# Supplementary material for: Niche-specific genome degradation and convergent evolution shaping Staphylococcus aureus adaptation during severe infections
Source: eLife journal article supplement (doi:10.7554/elife.77195), 2022-06-08

Adaption network of type II variants

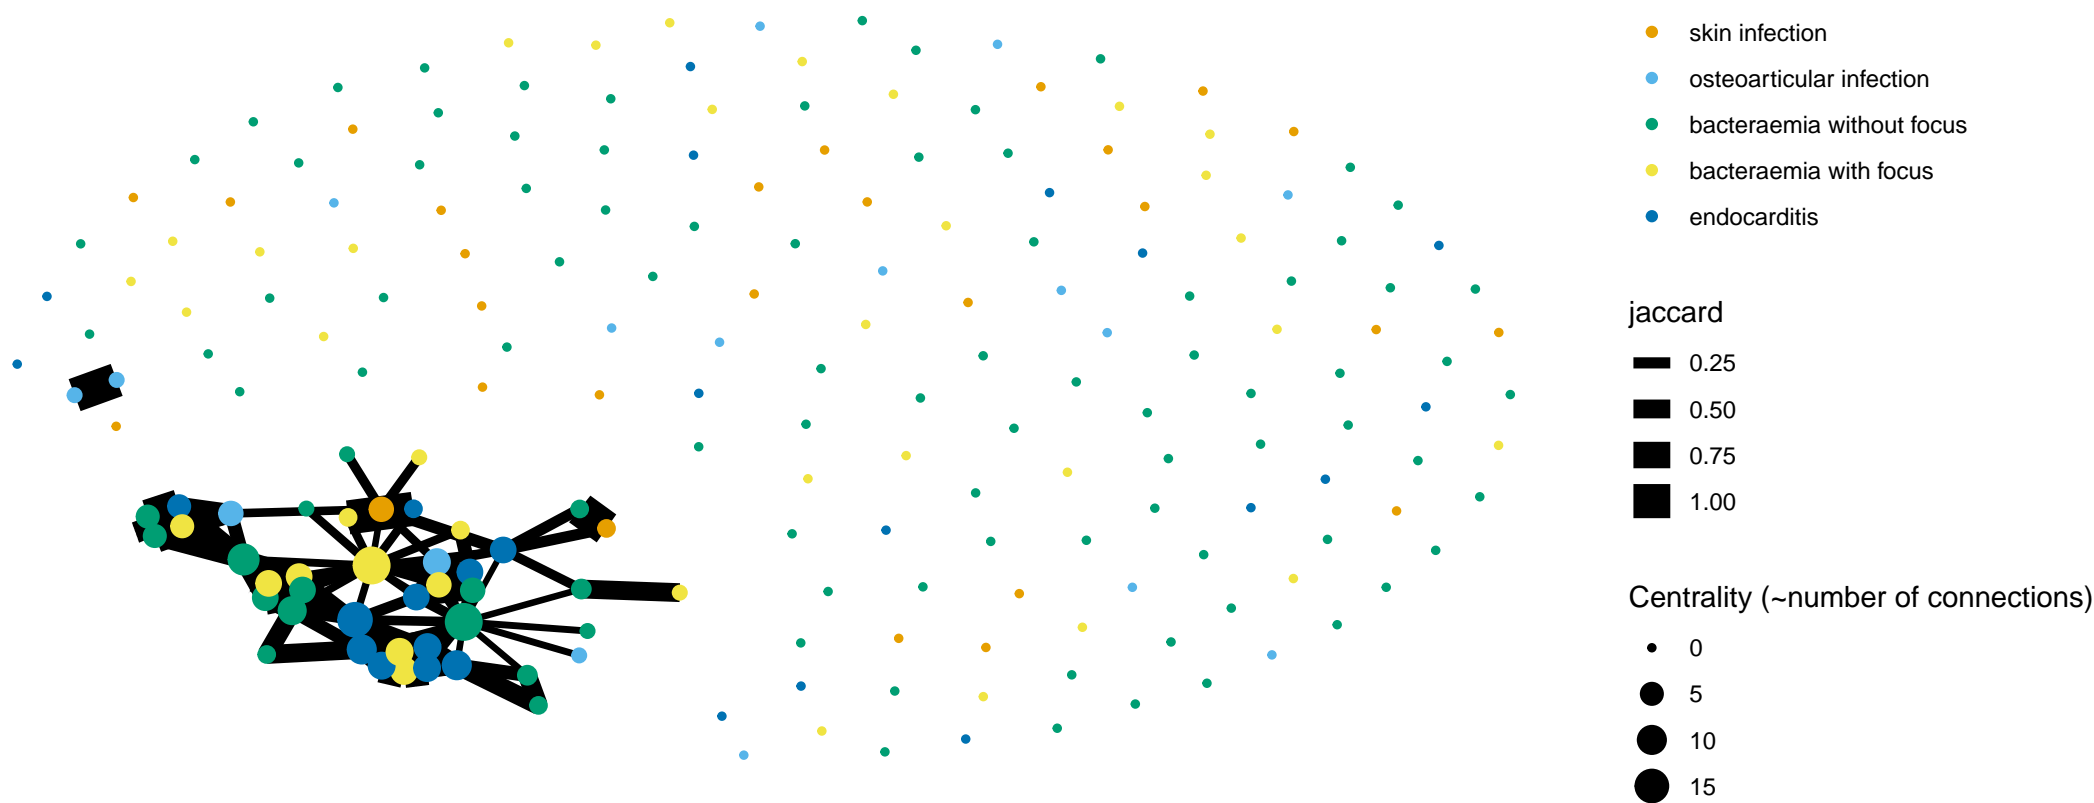

Adaptation network of type CC variants

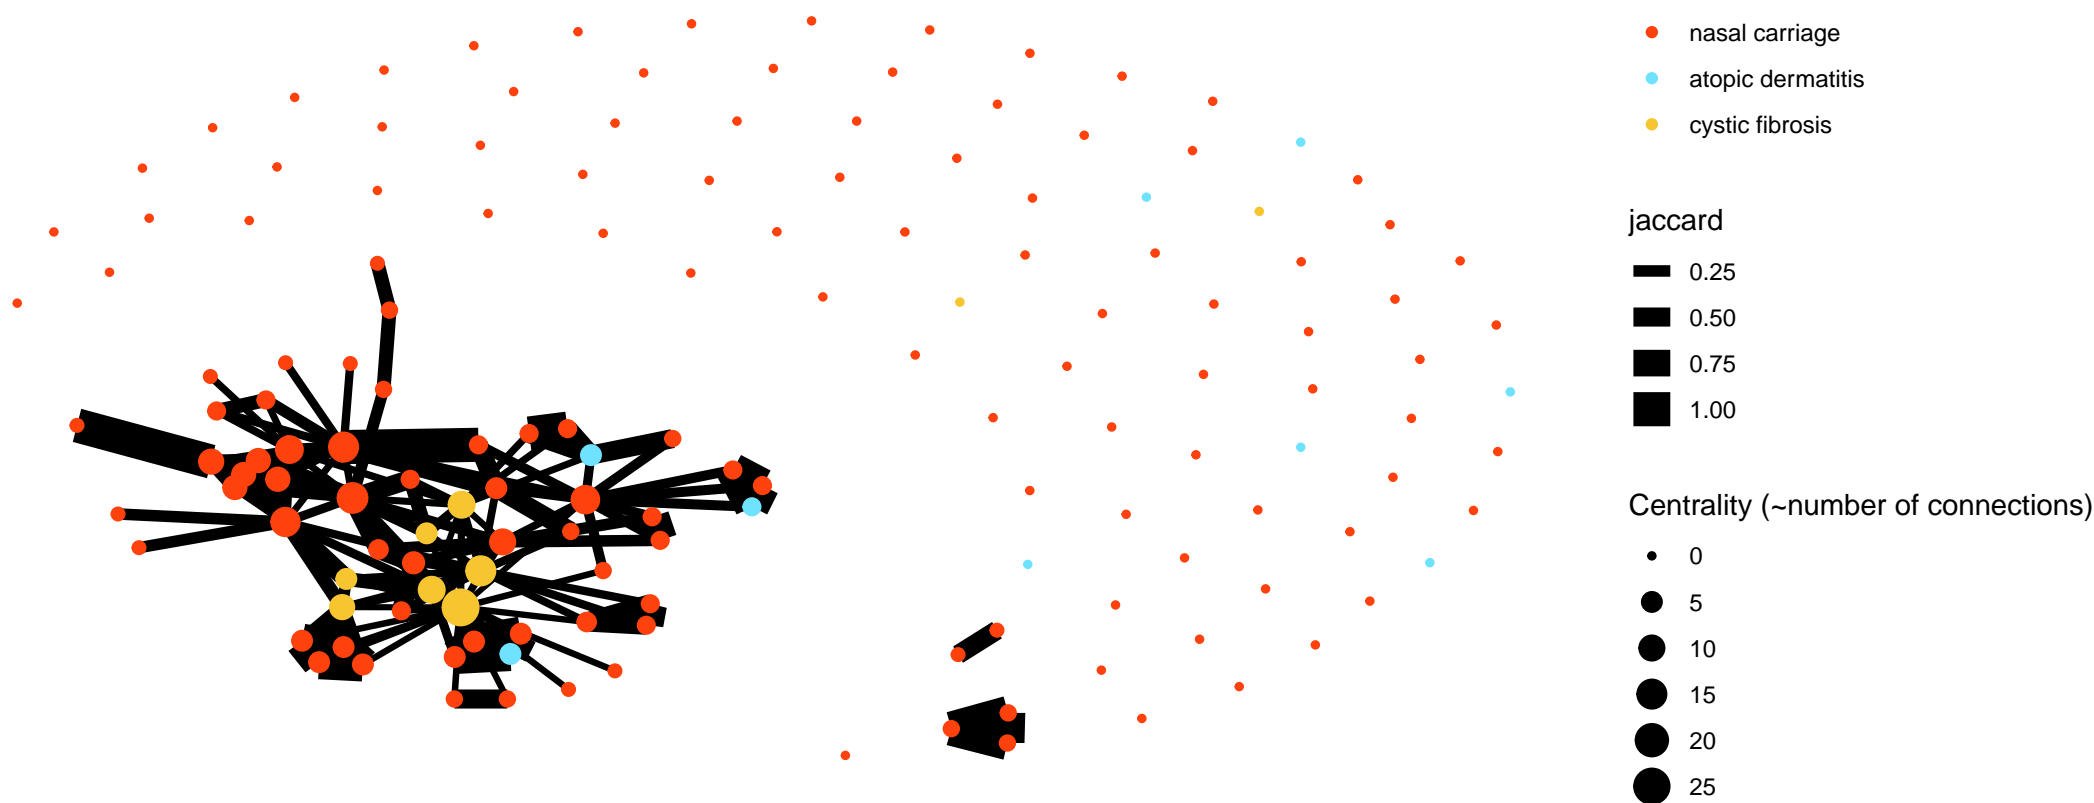

Adaptation network of type CI variants

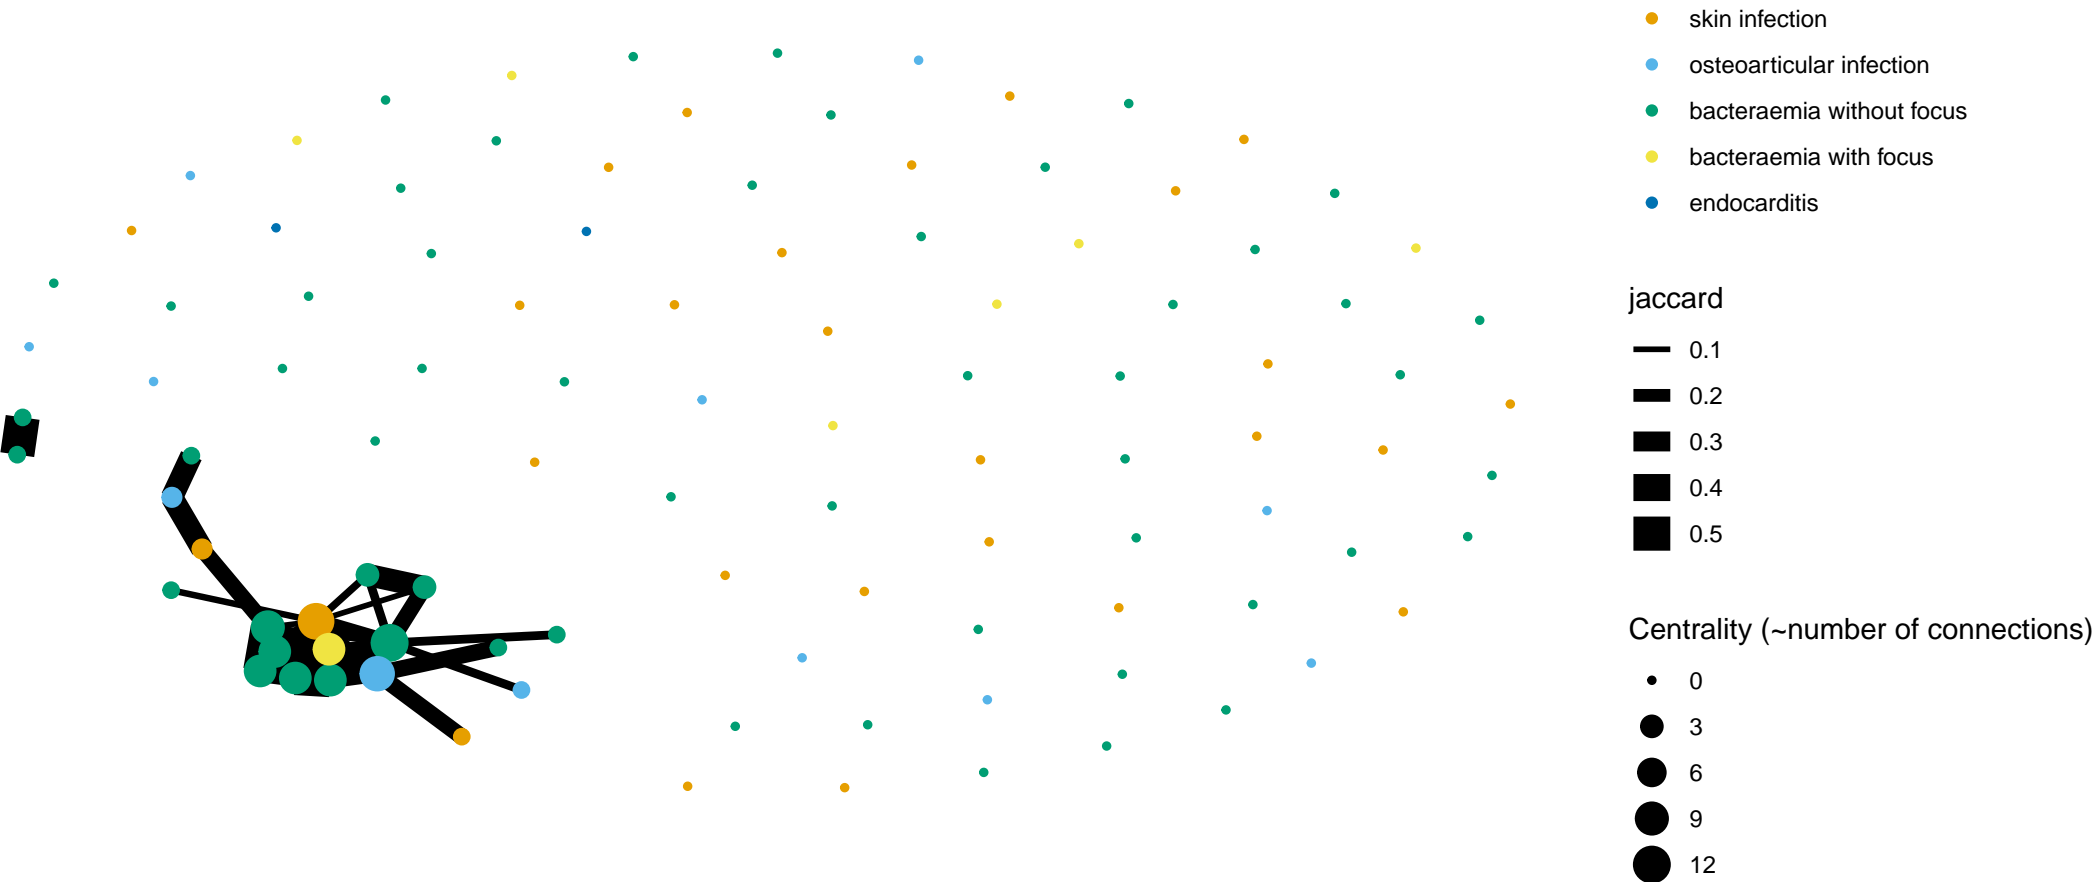

Supplement: supp [file elife-77195-supp-v1.zip]
