# Supplementary material for: Niche-specific genome degradation and convergent evolution shaping Staphylococcus aureus adaptation during severe infections
Source: eLife journal article supplement (doi:10.7554/elife.77195), 2022-06-08

**Homogeneity of Variance**  
Colonising

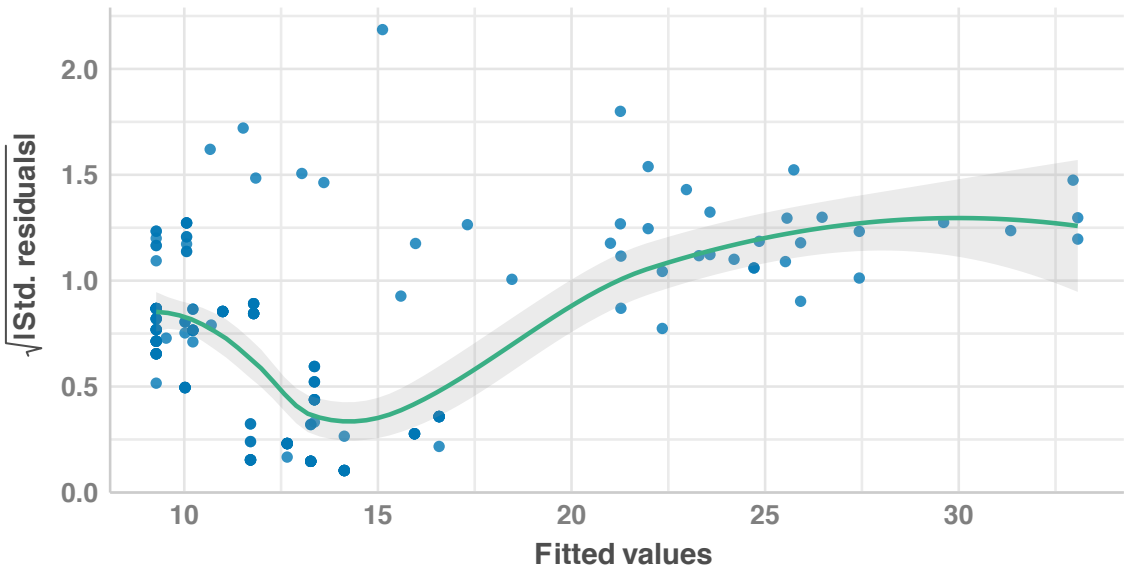

**Homogeneity of Variance**  
Invasive

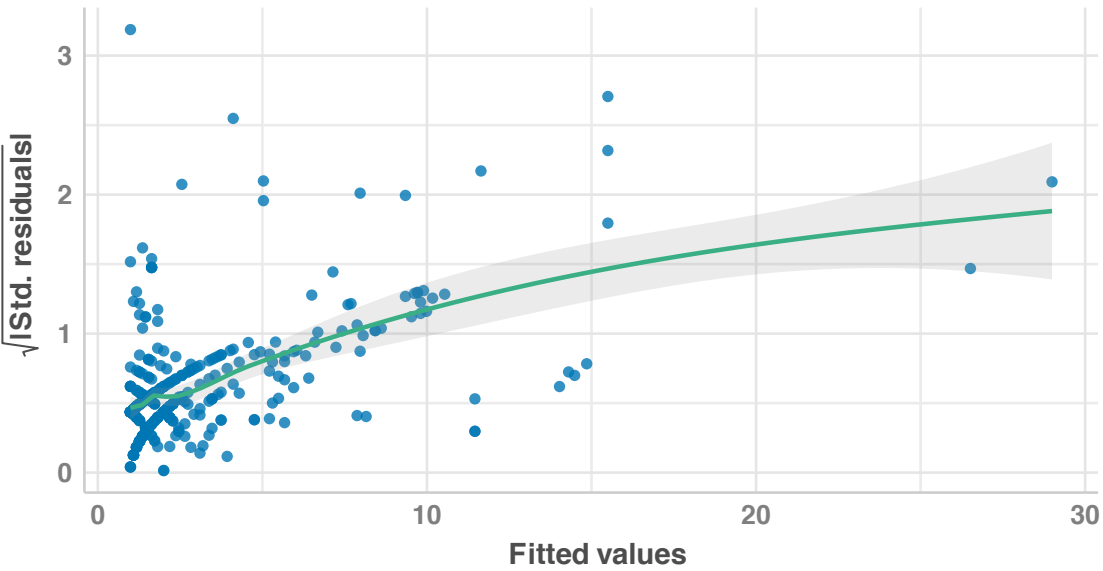

**Normality of Residuals**  
Colonising

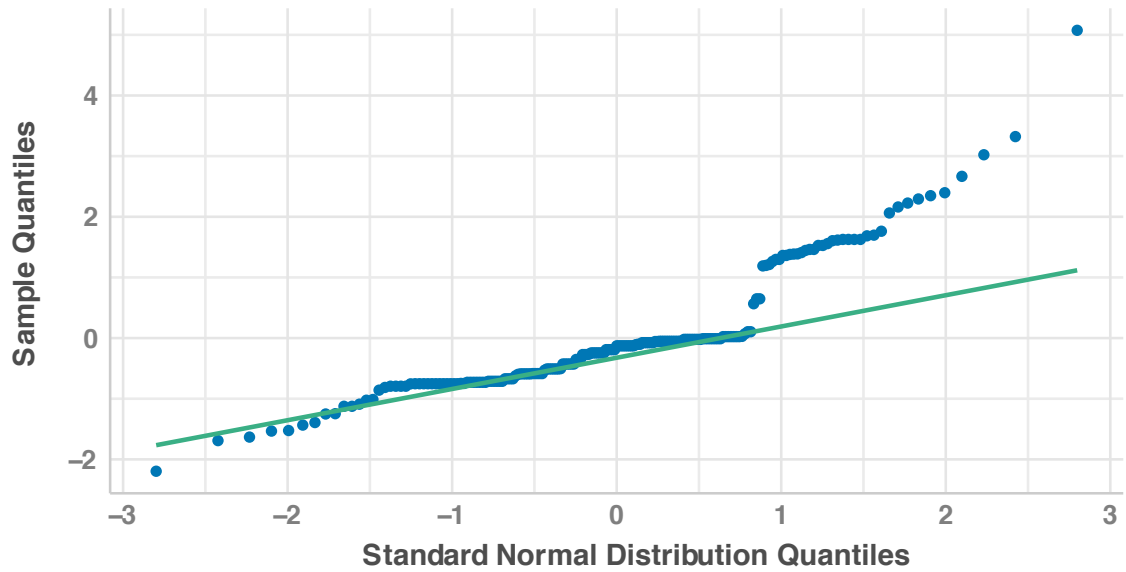

**Normality of Residuals**  
Invasive

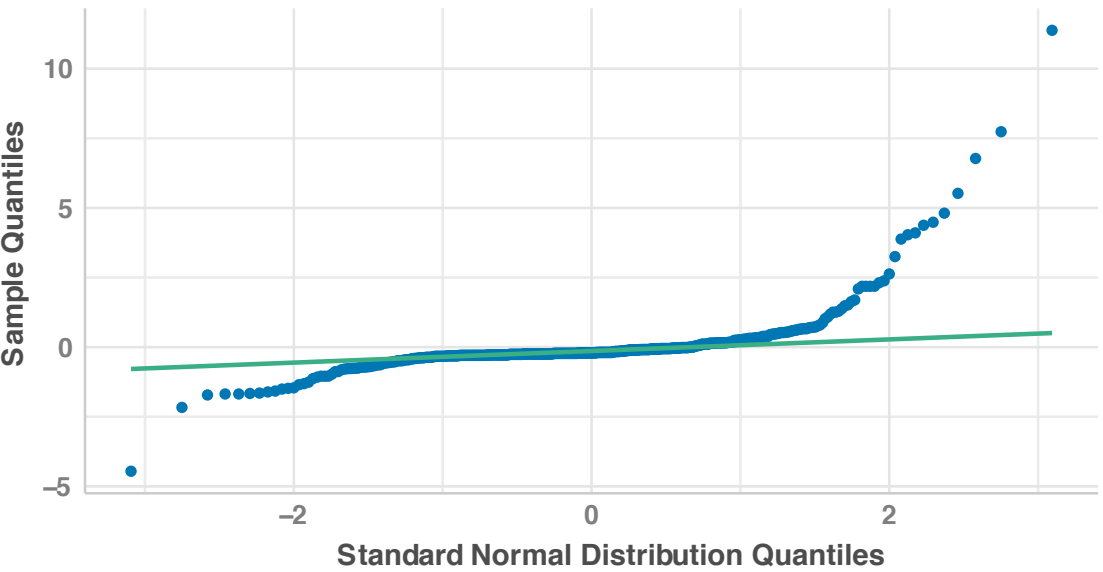

Supplement: supp [file elife-77195-supp-v1.zip]
