# Supplementary material for: Niche-specific genome degradation and convergent evolution shaping Staphylococcus aureus adaptation during severe infections
Source: eLife journal article supplement (doi:10.7554/elife.77195), 2022-06-08
Supplement: supp [file elife-77195-supp-v1.zip]

agrA

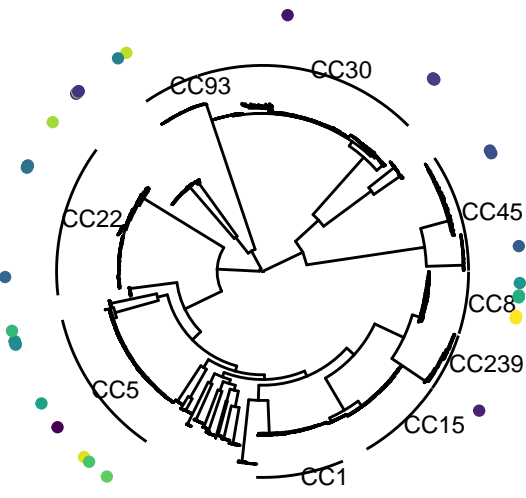

Mutation

- Q46\*
- I75N
- T88M
- L131fs
- Ter133Lext\*?
- D137fs
- Ter141fs
- G148D
- I150fs
- L162fs
- E163fs
- E163Y
- H174fs
- L186F
- F197fs
- R195C
- H208fs
- R218\*
- R218C
- E226fs
- I238fs
- Y238fs

agrC

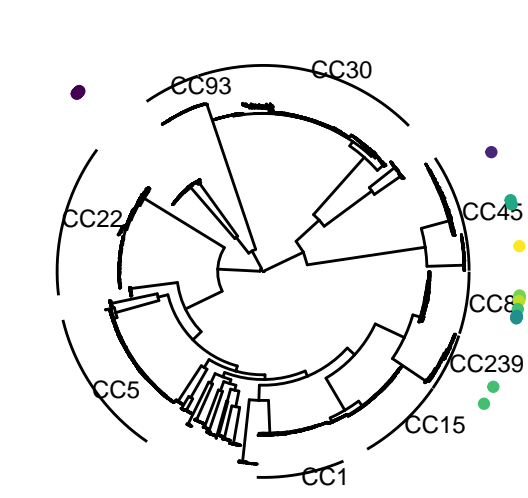

Mutation

- D2fs
- I30fs
- L38fs
- F117L
- F117LI139fs
- S28TI297V
- Y168fs
- IS insertion (intragenic)
- Q175E
- L193\*
- K206fs

stp1

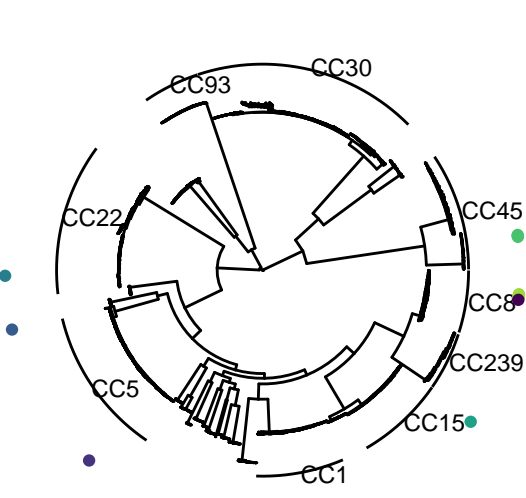

Mutation

- D9V
- Q70R
- N93\_K111del
- S136fs
- N137D
- Q149\*
- A226V
- V247L

mprF

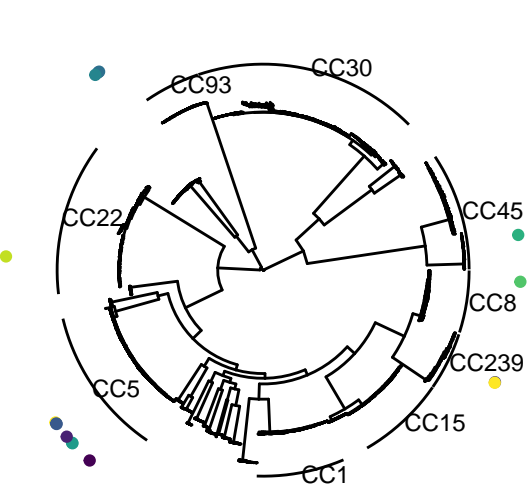

Mutation

- L78F
- S295A
- S295L
- P314L
- S337L
- I348del
- W424C
- L451\_V452delinsF
- T472K
- E593D
- L776S
- L826F

sucA

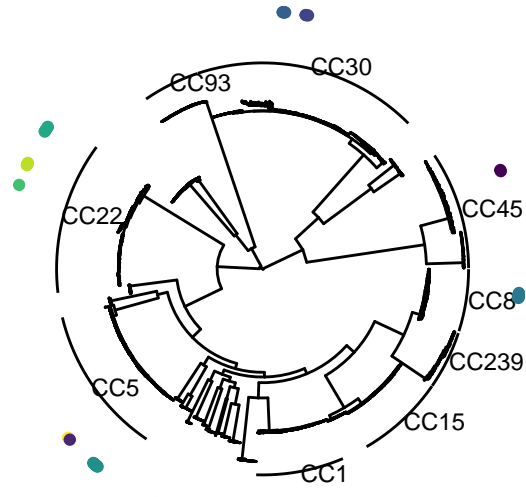

Mutation

- V42I
- H242Q
- V425D
- I500M
- P562T
- S622G
- S691P
- P717H
- P717T
- D897fs
- P909L

saeR

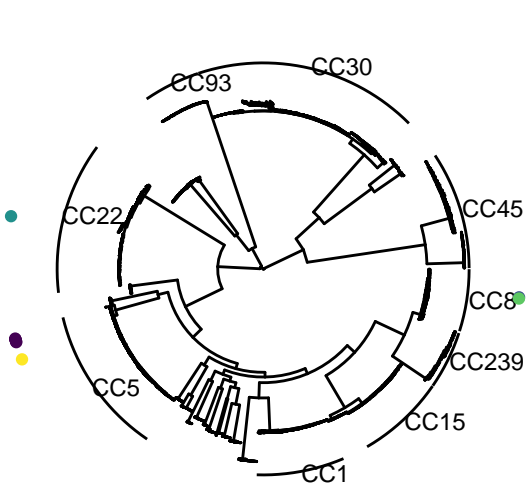

Mutation

- V49\_M53del
- P74S
- A165D
- E179K
- A190T

accB

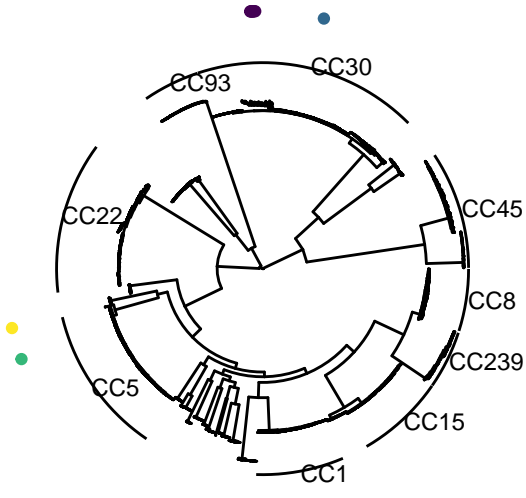

Mutation

- V53A
- A70T
- T112I
- I134V

SAUSA300\_1856

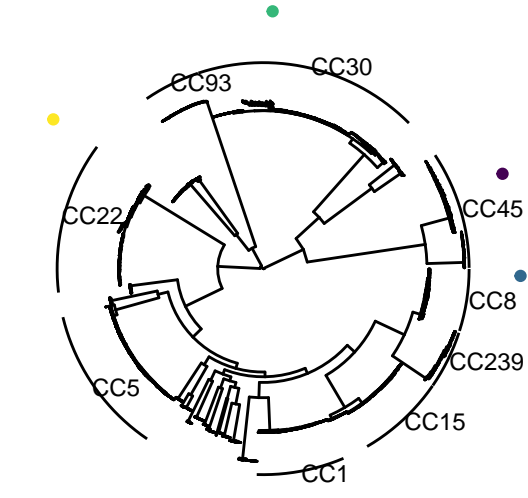

Mutation

- I32T
- G85A
- R86\*
- D157Y

xpaC

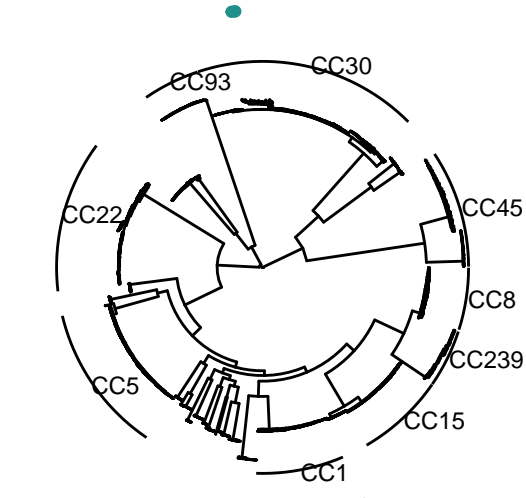

Mutation

- I31V
- Y132fs
- D179N

SAUSA300\_1613

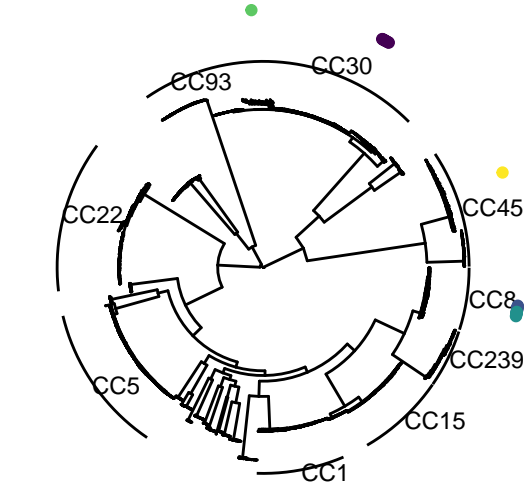

Mutation

- I92M
- L162F
- D171N
- I196T
- Ter356Yext\*?
