# Supplementary material for: Niche-specific genome degradation and convergent evolution shaping Staphylococcus aureus adaptation during severe infections
Source: eLife journal article supplement (doi:10.7554/elife.77195), 2022-06-08
Supplement: supp [file elife-77195-supp-v1.zip]

Archive with 23 entries (23 files):
- elife_poa_e77195_Figure_2_figure_supplement_1.pdf
- elife_poa_e77195_Figure_2_figure_supplement_2.pdf
- elife_poa_e77195_Figure_2_figure_supplement_3.pdf
- elife_poa_e77195_Figure_2_figure_supplement_4.pdf
- elife_poa_e77195_Figure_2_figure_supplement_5.pdf
- elife_poa_e77195_Figure_3_figure_supplement_1.pdf
- elife_poa_e77195_Figure_3_figure_supplement_2.pdf
- elife_poa_e77195_Figure_3_figure_supplement_3.pdf
- elife_poa_e77195_Figure_3_figure_supplement_4.pdf
- elife_poa_e77195_Figure_3_figure_supplement_5.pdf
- elife_poa_e77195_Figure_3_figure_supplement_6.pdf
- elife_poa_e77195_Figure_3_figure_supplement_7.pdf
- elife_poa_e77195_Figure_5_figure_supplement_1.pdf
- elife_poa_e77195_Figure_5_figure_supplement_2.pdf
- elife_poa_e77195_Figure_7_figure_supplement_1.pdf
- elife_poa_e77195_Figure_7_figure_supplement_2.pdf
- elife_poa_e77195_Supplementary_file_1.xlsx
- elife_poa_e77195_Supplementary_file_2.xlsx
- elife_poa_e77195_Supplementary_file_3.xlsx
- elife_poa_e77195_Supplementary_file_4.xlsx
- elife_poa_e77195_Supplementary_file_5.xlsx
- elife_poa_e77195_Supplementary_file_6.xlsx
- elife_poa_e77195_Table_1_source_data_1.docx
