# Supplementary material for: Niche-specific genome degradation and convergent evolution shaping Staphylococcus aureus adaptation during severe infections
Source: eLife journal article supplement (doi:10.7554/elife.77195), 2022-06-08
Supplement: supp [file elife-77195-supp-v1.zip › elife_poa_e77195_Supplementary_file_1.xlsx]

## Sheet: Dataset
List of colonisation/infection episodes
Study identifiers			Colonisation/infection episode data							Invasive infection characteristics										Colonisation/infection syndrome
first_author	pub_year	PMID	episode_id	n_colonising	n_invasive	colonising_sites	invasive_sites	timespan_colonising	timespan_invasive	bacteraemia	endocarditis	osteoarticular_infection	skin_infection	neurological_infection	neurological_infection_type	pulmonary_infection	abdominal_infection	implant_infection	implant_infection_type	colonising_group	invasive_group
Gao W	2015	28348811	WHM-2010-01-001	0	18		blood		116	Yes	No	Yes	No	No		No	No	No			bacteraemia with focus
Howden BP	2011	22102812	WHM-2011-01-001	0	2		blood		13	Yes	Yes	No	No	No		No	No	No			endocarditis
Howden BP	2011	22102812	WHM-2011-01-002	0	2		blood,skin		42	Yes	Yes	No	Yes	No		No	No	No			endocarditis
Howden BP	2011	22102812	WHM-2011-01-003	0	2		blood		15	Yes	No	No	No	No		No	Yes	No			bacteraemia without focus
Howden BP	2011	22102812	WHM-2011-01-004	0	2		blood		32	Yes	Yes	No	No	No		No	No	No			endocarditis
Howden BP	2011	22102812	WHM-2011-01-005	0	2		blood		8	Yes	No	No	No	No		No	No	Yes	Pacemaker		bacteraemia with focus
Young BC	2012	22393007	WHM-2012-04-001	57	11	nose	blood	450	0	Yes	No	No	No	No		No	No	No		nasal carriage	bacteraemia without focus
Young BC	2012	22393007	WHM-2012-04-002	21	0	nose		118												nasal carriage
Young BC	2012	22393007	WHM-2012-04-003	78	0	nose		599												nasal carriage
Golubchik T	2013	23658690	WHM-2013-02-001	10	0	nose		0												nasal carriage
Golubchik T	2013	23658690	WHM-2013-02-002	10	0	nose		0												nasal carriage
Golubchik T	2013	23658690	WHM-2013-02-003	11	0	nose		0												nasal carriage
Golubchik T	2013	23658690	WHM-2013-02-004	10	0	nose		0												nasal carriage
Golubchik T	2013	23658690	WHM-2013-02-005	6	0	nose		0												nasal carriage
Golubchik T	2013	23658690	WHM-2013-02-006	5	0	nose		0												nasal carriage
Golubchik T	2013	23658690	WHM-2013-02-007	11	0	nose		0												nasal carriage
Golubchik T	2013	23658690	WHM-2013-02-008	11	0	nose		0												nasal carriage
Golubchik T	2013	23658690	WHM-2013-02-009	7	0	nose		0												nasal carriage
Golubchik T	2013	23658690	WHM-2013-02-010	11	0	nose		0												nasal carriage
Golubchik T	2013	23658690	WHM-2013-02-011	10	0	nose		0												nasal carriage
Golubchik T	2013	23658690	WHM-2013-02-012	9	0	nose		0												nasal carriage
Golubchik T	2013	23658690	WHM-2013-02-013	9	0	nose		0												nasal carriage
Burd EM	2014	24850355	WHM-2014-01-001	0	3		blood		36	Yes	Yes	No	Yes	No		No	No	Yes	Pacemaker		endocarditis
Rishishwar L	2016	27446992	WHM-2016-01-001	0	3		blood		305	Yes	No	Yes	No	No		No	No	No			bacteraemia with focus
Trouillet-Assant S	2016	26918656	WHM-2016-03-001	0	2		bone		92	No	No	Yes	No	No		No	No	Yes	Other orthopaedic device		osteoarticular infection
Trouillet-Assant S	2016	26918656	WHM-2016-03-002	0	2		bone		214	No	No	Yes	No	No		No	No	Yes	Prosthetic join		osteoarticular infection
Trouillet-Assant S	2016	26918656	WHM-2016-03-003	0	2		bone		151	No	No	Yes	No	No		No	No	Yes	Prosthetic join		osteoarticular infection
Young BC	2017	29256859	WHM-2017-01-001	3	5	nose	skin	0	0	No	No	No	Yes	No		No	No	No		nasal carriage	skin infection
Young BC	2017	29256859	WHM-2017-01-002	5	5	nose	skin	1	0	No	No	No	Yes	No		No	No	No		nasal carriage	skin infection
Young BC	2017	29256859	WHM-2017-01-003	5	0	nose		0												nasal carriage
Young BC	2017	29256859	WHM-2017-01-004	5	5	nose	skin	4	0	No	No	No	Yes	No		No	No	No		nasal carriage	skin infection
Young BC	2017	29256859	WHM-2017-01-005	5	5	nose	blood	0	6	Yes	No	No	No	No		No	No	No		nasal carriage	bacteraemia without focus
Young BC	2017	29256859	WHM-2017-01-006	5	5	nose	skin	0	0	No	No	No	Yes	No		No	No	No		nasal carriage	skin infection
Young BC	2017	29256859	WHM-2017-01-007	5	5	nose	skin	2	0	No	No	No	Yes	No		No	No	No		nasal carriage	skin infection
Young BC	2017	29256859	WHM-2017-01-008	5	0	nose		0												nasal carriage
Young BC	2017	29256859	WHM-2017-01-009	5	5	nose	blood	0	0	Yes	No	No	No	No		No	No	No		nasal carriage	bacteraemia without focus
Young BC	2017	29256859	WHM-2017-01-010	5	10	nose	blood,skin	6	0	Yes	No	No	No	No		No	No	No		nasal carriage	bacteraemia without focus
Young BC	2017	29256859	WHM-2017-01-011	5	0	nose		0												nasal carriage
Young BC	2017	29256859	WHM-2017-01-012	5	0	nose		0												nasal carriage
Young BC	2017	29256859	WHM-2017-01-013	5	5	nose	blood	0	27	Yes	No	No	No	No		No	No	No		nasal carriage	bacteraemia without focus
Young BC	2017	29256859	WHM-2017-01-014	3	4	nose	skin	4	0	No	No	No	Yes	No		No	No	No		nasal carriage	skin infection
Young BC	2017	29256859	WHM-2017-01-015	5	4	nose	skin	0	2	No	No	No	Yes	No		No	Yes	No		nasal carriage	skin infection
Young BC	2017	29256859	WHM-2017-01-016	5	0	nose		0												nasal carriage
Young BC	2017	29256859	WHM-2017-01-017	5	5	nose	skin	0	0	No	No	No	Yes	No		No	No	No		nasal carriage	skin infection
Young BC	2017	29256859	WHM-2017-01-018	5	5	nose	skin	0	0	No	No	No	Yes	No		No	No	No		nasal carriage	skin infection
Young BC	2017	29256859	WHM-2017-01-019	5	5	nose	blood	0	1	Yes	No	No	No	No		No	No	No		nasal carriage	bacteraemia without focus
Young BC	2017	29256859	WHM-2017-01-020	5	3	nose	blood	0	1	Yes	No	No	No	No		No	No	No		nasal carriage	bacteraemia without focus
Young BC	2017	29256859	WHM-2017-01-021	5	5	nose	blood	2	0	Yes	No	No	No	No		No	No	No		nasal carriage	bacteraemia without focus
Young BC	2017	29256859	WHM-2017-01-022	5	5	nose	blood	0	0	Yes	No	No	No	No		No	No	No		nasal carriage	bacteraemia without focus
Young BC	2017	29256859	WHM-2017-01-023	5	9	nose	blood,skin	0	0	Yes	No	No	No	No		No	No	No		nasal carriage	bacteraemia without focus
Young BC	2017	29256859	WHM-2017-01-024	5	5	nose	bone	1	0	No	No	Yes	No	No		No	No	No		nasal carriage	osteoarticular infection
Young BC	2017	29256859	WHM-2017-01-025	4	5	nose	blood	0	1	Yes	No	No	No	No		No	No	No		nasal carriage	bacteraemia without focus
Young BC	2017	29256859	WHM-2017-01-026	5	5	nose	skin	0	0	No	No	No	Yes	No		No	No	No		nasal carriage	skin infection
Young BC	2017	29256859	WHM-2017-01-027	5	5	nose	bone	0	6	No	No	Yes	No	No		No	No	No		nasal carriage	osteoarticular infection
Young BC	2017	29256859	WHM-2017-01-028	4	5	nose	blood	0	0	Yes	No	No	No	No		No	No	No		nasal carriage	bacteraemia without focus
Young BC	2017	29256859	WHM-2017-01-029	4	5	nose	skin	0	0	No	No	No	Yes	No		No	No	No		nasal carriage	skin infection
Young BC	2017	29256859	WHM-2017-01-030	5	5	nose	skin	1	0	No	No	No	No	Yes	Spinal¬†epidural¬†abscess	No	No	No		nasal carriage	osteoarticular infection
Young BC	2017	29256859	WHM-2017-01-031	3	6	nose	blood,skin	3	7	Yes	No	No	No	No		No	No	No		nasal carriage	bacteraemia without focus
Young BC	2017	29256859	WHM-2017-01-032	5	5	nose	skin	0	0	No	No	No	Yes	No		No	No	No		nasal carriage	skin infection
Young BC	2017	29256859	WHM-2017-01-033	4	5	nose	skin	1	0	No	No	No	Yes	No		No	No	No		nasal carriage	skin infection
Young BC	2017	29256859	WHM-2017-01-034	5	4	nose	skin	1	0	No	No	No	Yes	No		No	No	No		nasal carriage	skin infection
Young BC	2017	29256859	WHM-2017-01-035	5	5	nose	bone	0	0	No	No	Yes	No	No		No	No	No		nasal carriage	osteoarticular infection
Young BC	2017	29256859	WHM-2017-01-036	4	4	nose	skin	3	0	No	No	No	Yes	No		No	No	No		nasal carriage	skin infection
Young BC	2017	29256859	WHM-2017-01-037	5	3	nose	blood	0	2	Yes	No	No	No	No		No	No	No		nasal carriage	bacteraemia without focus
Young BC	2017	29256859	WHM-2017-01-038	5	5	nose	blood	0	6	Yes	No	No	No	No		No	No	No		nasal carriage	bacteraemia without focus
Young BC	2017	29256859	WHM-2017-01-039	5	0	nose		0												nasal carriage
Young BC	2017	29256859	WHM-2017-01-040	5	5	nose	blood	0	2	Yes	No	No	No	No		No	No	No		nasal carriage	bacteraemia without focus
Young BC	2017	29256859	WHM-2017-01-041	3	5	nose	blood	7	0	Yes	No	No	No	No		No	No	No		nasal carriage	bacteraemia without focus
Young BC	2017	29256859	WHM-2017-01-042	4	5	nose	blood	0	2	Yes	No	No	No	No		No	No	No		nasal carriage	bacteraemia without focus
Young BC	2017	29256859	WHM-2017-01-043	4	5	nose	blood	0	6	Yes	No	No	No	No		No	No	No		nasal carriage	bacteraemia without focus
Young BC	2017	29256859	WHM-2017-01-044	5	5	nose	blood	0	0	Yes	No	No	No	No		No	No	No		nasal carriage	bacteraemia without focus
Young BC	2017	29256859	WHM-2017-01-045	3	5	nose	blood	0	1	Yes	No	No	No	No		No	No	No		nasal carriage	bacteraemia without focus
Young BC	2017	29256859	WHM-2017-01-046	5	0	nose		0												nasal carriage
Young BC	2017	29256859	WHM-2017-01-047	5	5	nose	blood	0	0	Yes	No	No	No	No		No	No	No		nasal carriage	bacteraemia without focus
Young BC	2017	29256859	WHM-2017-01-048	3	5	nose	blood	4	0	Yes	No	No	No	No		No	No	No		nasal carriage	bacteraemia without focus
Young BC	2017	29256859	WHM-2017-01-049	3	5	nose	blood	0	3	Yes	No	No	No	No		No	No	No		nasal carriage	bacteraemia without focus
Young BC	2017	29256859	WHM-2017-01-050	4	5	nose	blood	0	0	Yes	No	No	No	No		No	No	No		nasal carriage	bacteraemia without focus
Young BC	2017	29256859	WHM-2017-01-051	5	5	nose	blood	0	2	Yes	No	No	No	No		No	No	No		nasal carriage	bacteraemia without focus
Young BC	2017	29256859	WHM-2017-01-052	5	5	nose	blood	0	0	Yes	No	No	No	No		No	No	No		nasal carriage	bacteraemia without focus
Young BC	2017	29256859	WHM-2017-01-053	5	5	nose	blood	0	0	Yes	No	No	No	No		No	No	No		nasal carriage	bacteraemia without focus
Young BC	2017	29256859	WHM-2017-01-054	5	5	nose	blood	0	1	Yes	No	No	No	No		No	No	No		nasal carriage	bacteraemia without focus
Young BC	2017	29256859	WHM-2017-01-055	4	5	nose	blood	0	0	Yes	No	No	No	No		No	No	No		nasal carriage	bacteraemia without focus
Young BC	2017	29256859	WHM-2017-01-056	5	5	nose	blood	0	1	Yes	No	No	No	No		No	No	No		nasal carriage	bacteraemia without focus
Young BC	2017	29256859	WHM-2017-01-057	5	5	nose	blood	0	0	Yes	No	No	No	No		No	No	No		nasal carriage	bacteraemia without focus
Young BC	2017	29256859	WHM-2017-01-058	5	5	nose	blood	0	0	Yes	No	No	No	No		No	No	No		nasal carriage	bacteraemia without focus
Young BC	2017	29256859	WHM-2017-01-059	12	4	nose	blood	0	0	Yes	No	No	No	No		No	No	No		nasal carriage	bacteraemia without focus
Young BC	2017	29256859	WHM-2017-01-060	5	5	nose	blood	67	0	Yes	No	No	No	No		No	No	No		nasal carriage	bacteraemia without focus
Young BC	2017	29256859	WHM-2017-01-061	5	4	nose	blood	49	0	Yes	No	No	No	No		No	No	No		nasal carriage	bacteraemia without focus
Young BC	2017	29256859	WHM-2017-01-062	5	5	nose	blood	1	0	Yes	No	No	No	No		No	No	No		nasal carriage	bacteraemia without focus
Young BC	2017	29256859	WHM-2017-01-063	5	5	nose	blood	0	2	Yes	No	No	No	No		No	No	No		nasal carriage	bacteraemia without focus
Young BC	2017	29256859	WHM-2017-01-064	5	5	nose	blood	17	0	Yes	No	No	No	No		No	No	No		nasal carriage	bacteraemia without focus
Young BC	2017	29256859	WHM-2017-01-065	5	5	nose	blood	78	0	Yes	No	No	No	No		No	No	No		nasal carriage	bacteraemia without focus
Young BC	2017	29256859	WHM-2017-01-066	4	5	nose	blood	0	1	Yes	No	No	No	No		No	No	No		nasal carriage	bacteraemia without focus
Young BC	2017	29256859	WHM-2017-01-067	5	0	nose		0												nasal carriage
Young BC	2017	29256859	WHM-2017-01-068	5	5	nose	skin	14	0	No	No	No	Yes	No		No	No	No		nasal carriage	skin infection
Young BC	2017	29256859	WHM-2017-01-069	4	5	nose	bone	0	0	No	No	Yes	No	No		No	No	No		nasal carriage	osteoarticular infection
Young BC	2017	29256859	WHM-2017-01-070	5	5	nose	blood	0	1	Yes	No	No	No	No		No	No	No		nasal carriage	bacteraemia without focus
Young BC	2017	29256859	WHM-2017-01-071	5	5	nose	skin	3	0	No	No	No	Yes	No		No	No	No		nasal carriage	skin infection
Young BC	2017	29256859	WHM-2017-01-072	4	4	nose	skin	3	0	No	No	No	Yes	No		No	No	No		nasal carriage	skin infection
Young BC	2017	29256859	WHM-2017-01-073	5	5	nose	skin	16	0	No	No	Yes	No	No		No	No	No		nasal carriage	osteoarticular infection
Young BC	2017	29256859	WHM-2017-01-074	5	5	nose	bone	0	0	No	No	No	No	No		No	No	Yes	Pacemaker	nasal carriage	skin infection
Young BC	2017	29256859	WHM-2017-01-075	5	0	nose		0												nasal carriage
Young BC	2017	29256859	WHM-2017-01-076	5	5	nose	blood	0	3	Yes	No	No	No	No		No	No	No		nasal carriage	bacteraemia without focus
Young BC	2017	29256859	WHM-2017-01-077	4	0	nose		0												nasal carriage
Young BC	2017	29256859	WHM-2017-01-078	3	9	nose	blood,bone	13	13	Yes	No	Yes	No	No		No	No	No		nasal carriage	bacteraemia with focus
Young BC	2017	29256859	WHM-2017-01-079	5	5	nose	blood	0	1	Yes	No	No	No	No		No	No	No		nasal carriage	bacteraemia without focus
Young BC	2017	29256859	WHM-2017-01-080	5	5	nose	blood	0	4	Yes	No	No	No	No		No	No	No		nasal carriage	bacteraemia without focus
Young BC	2017	29256859	WHM-2017-01-081	5	5	nose	blood	0	0	Yes	No	No	No	No		No	No	No		nasal carriage	bacteraemia without focus
Young BC	2017	29256859	WHM-2017-01-082	4	5	nose	blood	0	0	Yes	No	No	No	No		No	No	No		nasal carriage	bacteraemia without focus
Young BC	2017	29256859	WHM-2017-01-083	5	0	nose		0												nasal carriage
Young BC	2017	29256859	WHM-2017-01-084	5	5	nose	bone	1	0	No	No	No	No	No		No	No	Yes	Pacemaker	nasal carriage	skin infection
Young BC	2017	29256859	WHM-2017-01-085	5	5	nose	skin	0	0	No	No	No	Yes	No		No	No	No		nasal carriage	skin infection
Young BC	2017	29256859	WHM-2017-01-086	3	5	nose	blood	0	0	Yes	No	No	No	No		No	No	No		nasal carriage	bacteraemia without focus
Young BC	2017	29256859	WHM-2017-01-087	5	5	nose	blood	1	0	Yes	No	No	No	No		No	No	No		nasal carriage	bacteraemia without focus
Young BC	2017	29256859	WHM-2017-01-088	5	5	nose	skin	0	1	No	No	No	Yes	No		No	No	No		nasal carriage	skin infection
Young BC	2017	29256859	WHM-2017-01-089	5	5	nose	skin	0	0	No	No	No	Yes	No		No	No	No		nasal carriage	skin infection
Young BC	2017	29256859	WHM-2017-01-090	10	9	nose	skin	2	0	No	No	No	Yes	No		No	No	No		nasal carriage	skin infection
Young BC	2017	29256859	WHM-2017-01-091	12	10	nose	skin	0	0	No	No	No	Yes	No		No	No	No		nasal carriage	skin infection
Young BC	2017	29256859	WHM-2017-01-092	12	12	nose	skin	2	0	No	No	Yes	No	No		No	No	No		nasal carriage	osteoarticular infection
Young BC	2017	29256859	WHM-2017-01-093	12	11	nose	skin	0	0	No	No	No	Yes	No		No	No	No		nasal carriage	skin infection
Young BC	2017	29256859	WHM-2017-01-094	10	12	nose	skin	0	0	No	No	No	No	No		No	Yes	No		nasal carriage	skin infection
Young BC	2017	29256859	WHM-2017-01-095	12	11	nose	skin	0	1	No	No	No	Yes	No		No	No	No		nasal carriage	skin infection
Young BC	2017	29256859	WHM-2017-01-096	9	12	nose	skin	3	0	No	No	No	Yes	No		No	No	No		nasal carriage	skin infection
Young BC	2017	29256859	WHM-2017-01-097	12	12	nose	skin	0	0	No	No	No	Yes	No		No	No	No		nasal carriage	skin infection
Young BC	2017	29256859	WHM-2017-01-098	11	12	nose	skin	0	0	No	No	No	Yes	No		No	No	No		nasal carriage	skin infection
Young BC	2017	29256859	WHM-2017-01-099	5	5	nose	bone	4	0	No	No	Yes	No	No		No	No	No		nasal carriage	osteoarticular infection
Young BC	2017	29256859	WHM-2017-01-100	5	5	nose	bone	1	0	No	No	Yes	No	No		No	No	No		nasal carriage	osteoarticular infection
Young BC	2017	29256859	WHM-2017-01-101	5	5	nose	skin	0	2	No	No	Yes	No	No		No	No	No		nasal carriage	osteoarticular infection
Young BC	2017	29256859	WHM-2017-01-102	5	0	nose		0												nasal carriage
Young BC	2017	29256859	WHM-2017-01-103	5	4	nose	bone	22	0	No	No	Yes	No	No		No	No	No		nasal carriage	osteoarticular infection
Young BC	2017	29256859	WHM-2017-01-104	5	5	nose	bone	10	0	No	No	Yes	No	No		No	No	No		nasal carriage	osteoarticular infection
Young BC	2017	29256859	WHM-2017-01-105	5	5	nose	skin	3	0	No	No	No	Yes	No		No	No	No		nasal carriage	skin infection
Rouard C	2018	30275089	WHM-2018-02-001	3	0	cystic fibrosis		1151												cystic fibrosis
Langhanki L	2018	30348081	WHM-2018-03-001	2	0	cystic fibrosis		1095												cystic fibrosis
Altman DR	2018	30061376	WHM-2018-04-035	1	1	nose	blood			Yes	No	No	No	No		Yes	No	No		nasal carriage	bacteraemia with focus
Altman DR	2018	30061376	WHM-2018-04-036	1	1	nose	blood			Yes	No	No	No	No		No	No	No		nasal carriage	bacteraemia without focus
Altman DR	2018	30061376	WHM-2018-04-045	1	1	nose	blood			Yes	Yes	No	No	No		No	No	No		nasal carriage	endocarditis
Altman DR	2018	30061376	WHM-2018-04-060	1	1	nose	blood			Yes	No	No	No	No		No	No	No		nasal carriage	bacteraemia without focus
Altman DR	2018	30061376	WHM-2018-04-063	1	1	nose	blood			Yes	No	No	No	No		No	No	No		nasal carriage	bacteraemia without focus
Altman DR	2018	30061376	WHM-2018-04-073	1	1	nose	blood			Yes	No	No	Yes	No		No	No	No		nasal carriage	bacteraemia without focus
Altman DR	2018	30061376	WHM-2018-04-108	1	1	nose	blood			Yes	No	Yes	No	No		No	No	No		nasal carriage	bacteraemia with focus
Altman DR	2018	30061376	WHM-2018-04-117	1	2	nose	blood,central nervous system			Yes	No	No	No	Yes		Yes	No	No		nasal carriage	bacteraemia with focus
Altman DR	2018	30061376	WHM-2018-04-135	1	2	nose	blood,skin			Yes	No	No	Yes	No		No	No	No		nasal carriage	bacteraemia without focus
Altman DR	2018	30061376	WHM-2018-04-152	1	2	nose	blood,skin			Yes	No	No	Yes	No		No	No	No		nasal carriage	bacteraemia without focus
Giulieri SG	2018	30103826	WHM-2018-05-001	0	2		blood		10	Yes	Yes	No	Yes	No		No	No	No			endocarditis
Giulieri SG	2018	30103826	WHM-2018-05-002	0	2		blood		5	Yes	No	Yes	No	No		No	No	No			bacteraemia with focus
Giulieri SG	2018	30103826	WHM-2018-05-003	1	2	nose	blood	38	25	Yes	No	No	No	No		No	No	No		nasal carriage	bacteraemia without focus
Giulieri SG	2018	30103826	WHM-2018-05-004	0	2		blood			Yes	No	No	No	No		No	No	No			bacteraemia without focus
Giulieri SG	2018	30103826	WHM-2018-05-005	0	2		blood		18	Yes	No	No	No	No		No	No	No			bacteraemia without focus
Giulieri SG	2018	30103826	WHM-2018-05-007	0	2		blood		4	Yes	No	Yes	No	Yes	Spinal epidural abscess	No	No	No			bacteraemia with focus
Giulieri SG	2018	30103826	WHM-2018-05-008	0	2		blood		3	Yes	No	No	No	No		No	No	No			bacteraemia without focus
Giulieri SG	2018	30103826	WHM-2018-05-009	0	2		blood		3	Yes	No	No	No	No		No	No	No			bacteraemia without focus
Giulieri SG	2018	30103826	WHM-2018-05-010	0	2		blood		31	Yes	No	No	Yes	No		No	No	No			bacteraemia without focus
Giulieri SG	2018	30103826	WHM-2018-05-011	0	2		blood		3	Yes	No	Yes	No	No		No	No	No			bacteraemia with focus
Giulieri SG	2018	30103826	WHM-2018-05-012	0	2		blood		5	Yes	No	Yes	No	No		No	No	No			bacteraemia with focus
Giulieri SG	2018	30103826	WHM-2018-05-013	0	2		blood		3	Yes	No	Yes	No	No		No	No	No			bacteraemia with focus
Giulieri SG	2018	30103826	WHM-2018-05-014	0	2		blood		4	Yes	No	No	No	Yes	Spinal epidural abscess	No	No	No			bacteraemia with focus
Giulieri SG	2018	30103826	WHM-2018-05-015	0	2		blood		5	Yes	Yes	No	No	No		No	No	Yes	Other		endocarditis
Giulieri SG	2018	30103826	WHM-2018-05-016	0	2		blood		5	Yes	No	No	No	No		No	No	No			bacteraemia without focus
Giulieri SG	2018	30103826	WHM-2018-05-017	0	2		blood		6	Yes	No	Yes	No	No		No	No	No			bacteraemia with focus
Giulieri SG	2018	30103826	WHM-2018-05-018	0	2		blood		3	Yes	No	Yes	No	No		No	No	No			bacteraemia with focus
Giulieri SG	2018	30103826	WHM-2018-05-021	0	2		blood		65	Yes	No	Yes	No	No		No	No	No			bacteraemia with focus
Giulieri SG	2018	30103826	WHM-2018-05-022	0	2		blood		9	Yes	No	No	No	No		No	No	No			bacteraemia without focus
Giulieri SG	2018	30103826	WHM-2018-05-023	0	3		blood		4	Yes	No	Yes	No	Yes	Spinal epidural abscess	No	No	No			bacteraemia with focus
Giulieri SG	2018	30103826	WHM-2018-05-024	0	3		blood		7	Yes	Yes	No	No	No		No	No	No			endocarditis
Giulieri SG	2018	30103826	WHM-2018-05-025	0	2		blood		3	Yes	No	No	No	No		No	No	No			bacteraemia without focus
Giulieri SG	2018	30103826	WHM-2018-05-026	0	3		blood		5	Yes	Yes	No	No	No		No	No	No			endocarditis
Giulieri SG	2018	30103826	WHM-2018-05-027	2	5	nose	blood	139	0	Yes	Yes	No	No	Yes	Brain abscess	No	No	No		nasal carriage	endocarditis
Giulieri SG	2018	30103826	WHM-2018-05-028	0	2		blood		5	Yes	Yes	Yes	No	No		No	No	No			endocarditis
Giulieri SG	2018	30103826	WHM-2018-05-029	0	3		blood		7	Yes	No	No	No	No		No	No	No			bacteraemia without focus
Giulieri SG	2018	30103826	WHM-2018-05-030	0	2		blood		14	Yes	No	No	No	No		No	No	No			bacteraemia without focus
Giulieri SG	2018	30103826	WHM-2018-05-031	0	2		blood		7	Yes	Yes	No	No	No		No	No	No			endocarditis
Giulieri SG	2018	30103826	WHM-2018-05-032	0	2		blood		15	Yes	No	No	No	No		No	No	No			bacteraemia without focus
Giulieri SG	2018	30103826	WHM-2018-05-033	0	2		blood		5	Yes	Yes	No	No	No		No	No	No			endocarditis
Giulieri SG	2018	30103826	WHM-2018-05-034	0	2		blood		9	Yes	No	No	No	No		No	No	No			bacteraemia without focus
Giulieri SG	2018	30103826	WHM-2018-05-035	0	2		blood		5	Yes	No	No	No	No		No	No	No			bacteraemia without focus
Giulieri SG	2018	30103826	WHM-2018-05-037	0	2		blood		13	Yes	No	Yes	No	No		No	No	No			bacteraemia with focus
Giulieri SG	2018	30103826	WHM-2018-05-038	0	5		blood		478	Yes	Yes	No	No	No		No	No	No			endocarditis
Giulieri SG	2018	30103826	WHM-2018-05-039	0	2		blood		23	Yes	No	No	Yes	No		No	No	No			bacteraemia without focus
Giulieri SG	2018	30103826	WHM-2018-05-040	0	2		blood		8	Yes	No	No	No	No		No	No	No			bacteraemia without focus
Giulieri SG	2018	30103826	WHM-2018-05-041	0	2		blood		8	Yes	No	No	No	No		No	No	No			bacteraemia without focus
Giulieri SG	2018	30103826	WHM-2018-05-042	0	2		blood		9	Yes	No	No	No	No		No	No	No			bacteraemia without focus
Giulieri SG	2018	30103826	WHM-2018-05-043	0	2		blood		30	Yes	No	No	No	No		No	No	No			bacteraemia without focus
Giulieri SG	2018	30103826	WHM-2018-05-046	0	2		blood		23	Yes	No	No	No	No		No	No	No			bacteraemia without focus
Giulieri SG	2018	30103826	WHM-2018-05-047	0	2		blood		38	Yes	No	No	No	No		No	No	No			bacteraemia without focus
Giulieri SG	2018	30103826	WHM-2018-05-048	0	2		blood		15	Yes	No	No	No	No		No	No	No			bacteraemia without focus
Giulieri SG	2018	30103826	WHM-2018-05-049	0	2		blood		10	Yes	No	No	No	No		No	No	No			bacteraemia without focus
Giulieri SG	2018	30103826	WHM-2018-05-050	0	2		blood		36	Yes	No	No	Yes	No		No	No	No			bacteraemia without focus
Giulieri SG	2018	30103826	WHM-2018-05-052	1	1	nose	blood	0	0	Yes	No	No	No	No		No	No	No		nasal carriage	bacteraemia without focus
Giulieri SG	2018	30103826	WHM-2018-05-053	1	1	nose	blood	8	16	Yes	No	No	No	No		No	Yes	No		nasal carriage	bacteraemia without focus
Giulieri SG	2018	30103826	WHM-2018-05-054	1	1	nose	blood	3	0	Yes	No	Yes	No	No		No	No	No		nasal carriage	bacteraemia with focus
Giulieri SG	2018	30103826	WHM-2018-05-055	1	1	nose	blood	0	0	Yes	No	No	No	No		No	No	No		nasal carriage	bacteraemia without focus
Giulieri SG	2018	30103826	WHM-2018-05-056	1	1	nose	blood	127	254	Yes	No	No	Yes	No		No	No	No		nasal carriage	bacteraemia without focus
Giulieri SG	2018	30103826	WHM-2018-05-057	1	1	nose	blood	85	0	Yes	No	No	No	No		No	No	No		nasal carriage	bacteraemia without focus
Benoit JB	2018	29723202	WHM-2018-06-001	7	0	nose		0												nasal carriage
Benoit JB	2018	29723202	WHM-2018-06-002	3	1	nose	blood	0	1076	Yes	No	No	No	No		Yes	No	No		nasal carriage	bacteraemia with focus
Benoit JB	2018	29723202	WHM-2018-06-003	8	1	nose	blood	0	824	Yes	No	No	No	No		No	No	No		nasal carriage	bacteraemia without focus
Benoit JB	2018	29723202	WHM-2018-06-004	3	0	nose		0												nasal carriage
Benoit JB	2018	29723202	WHM-2018-06-005	3	1	nose	blood	0	1106	Yes	No	No	No	No		No	No	No		nasal carriage	bacteraemia without focus
Benoit JB	2018	29723202	WHM-2018-06-006	4	1	nose	blood	0	1001	Yes	No	No	No	No		No	No	No		nasal carriage	bacteraemia without focus
Benoit JB	2018	29723202	WHM-2018-06-007	3	0	nose		0												nasal carriage
Benoit JB	2018	29723202	WHM-2018-06-008	6	1	nose	blood	0	535	Yes	No	No	No	No		No	No	No		nasal carriage	bacteraemia without focus
Suligoy CM	2018	29456969	WHM-2018-07-001	0	3		bone		390	No	No	Yes	No	No		No	No	No			osteoarticular infection
Harkins CP	2018	28951239	WHM-2018-08-001	25	0	nose,skin,skin (atopic dermatitis)		0												atopic dermatitis
Harkins CP	2018	28951239	WHM-2018-08-002	10	0	skin (atopic dermatitis)		0												atopic dermatitis
Harkins CP	2018	28951239	WHM-2018-08-003	22	0	skin,skin (atopic dermatitis)		0												atopic dermatitis
Harkins CP	2018	28951239	WHM-2018-08-004	28	0	nose,skin,skin (atopic dermatitis)		0												atopic dermatitis
Harkins CP	2018	28951239	WHM-2018-08-005	10	0	skin (atopic dermatitis)		0												atopic dermatitis
Harkins CP	2018	28951239	WHM-2018-08-006	11	0	skin,skin (atopic dermatitis)		0												atopic dermatitis
Harkins CP	2018	28951239	WHM-2018-08-008	17	0	nose,skin,skin (atopic dermatitis)		0												atopic dermatitis
Harkins CP	2018	28951239	WHM-2018-08-009	13	0	skin (atopic dermatitis)		0												atopic dermatitis
Harkins CP	2018	28951239	WHM-2018-08-010	26	0	nose,skin,skin (atopic dermatitis)		0												atopic dermatitis
Harkins CP	2018	28951239	WHM-2018-08-016	4	0	nose		0												nasal carriage
Harkins CP	2018	28951239	WHM-2018-08-026	5	0	nose		0												nasal carriage
Harkins CP	2018	28951239	WHM-2018-08-039	5	0	nose		0												nasal carriage
Harkins CP	2018	28951239	WHM-2018-08-045	5	0	nose		0												nasal carriage
Harkins CP	2018	28951239	WHM-2018-08-057	4	0	nose		0												nasal carriage
Harkins CP	2018	28951239	WHM-2018-08-059	5	0	nose		0												nasal carriage
Harkins CP	2018	28951239	WHM-2018-08-091	5	0	nose		0												nasal carriage
Harkins CP	2018	28951239	WHM-2018-08-094	4	0	nose		0												nasal carriage
Harkins CP	2018	28951239	WHM-2018-08-099	5	0	nose		0												nasal carriage
Harkins CP	2018	28951239	WHM-2018-08-105	5	0	nose		0												nasal carriage
Harkins CP	2018	28951239	WHM-2018-08-141	5	0	nose		0												nasal carriage
Harkins CP	2018	28951239	WHM-2018-08-147	5	0	nose		0												nasal carriage
Harkins CP	2018	28951239	WHM-2018-08-149	5	0	nose		0												nasal carriage
Harkins CP	2018	28951239	WHM-2018-08-153	5	0	nose		0												nasal carriage
Harkins CP	2018	28951239	WHM-2018-08-157	5	0	nose		0												nasal carriage
Harkins CP	2018	28951239	WHM-2018-08-250	5	0	nose		0												nasal carriage
Harkins CP	2018	28951239	WHM-2018-08-268	4	0	nose		0												nasal carriage
Harkins CP	2018	28951239	WHM-2018-08-303	5	0	nose		0												nasal carriage
Tan X	2019	30753350	WHM-2019-01-001	2	0	cystic fibrosis		1096												cystic fibrosis
Tan X	2019	30753350	WHM-2019-01-002	2	0	cystic fibrosis		1461												cystic fibrosis
Tan X	2019	30753350	WHM-2019-01-003	2	0	cystic fibrosis		2191												cystic fibrosis
Tan X	2019	30753350	WHM-2019-01-004	2	0	cystic fibrosis		3288												cystic fibrosis
Loss G	2019	31696062	WHM-2019-02-001	0	2		bone		1000	No	No	Yes	No	No		No	No	Yes	Prosthetic joint		osteoarticular infection
Kuroda M	2019	31474962	WHM-2019-03-001	0	16		blood		76	Yes	No	No	No	No		No	No	No			bacteraemia without focus
Azarian T	2019	31244886	WHM-2019-05-002	21	0	cystic fibrosis		1271												cystic fibrosis
Azarian T	2019	31244886	WHM-2019-05-003	21	0	cystic fibrosis		1759												cystic fibrosis
Azarian T	2019	31244886	WHM-2019-05-004	2	0	cystic fibrosis		688												cystic fibrosis
W‚àö¬∫thrich D	2019	30726929	WHM-2019-06-001	1	4	nose	blood,bone,pleural space	67	31	Yes	No	Yes	No	No		Yes	No	Yes	Other orthopaedic device	nasal carriage	bacteraemia with focus
Ji S	2020	32176794	WHM-2020-01-001	0	7		blood		19	Yes	Yes	No	No	No		No	No	Yes	Other		endocarditis
Ji S	2020	32176794	WHM-2020-01-002	0	5		blood		381	Yes	Yes	No	No	No		No	No	No			endocarditis
Ji S	2020	32176794	WHM-2020-01-003	0	8		blood		158	Yes	Yes	No	No	No		No	No	No			endocarditis
Miller CR	2020	31932377	WHM-2020-02-001	0	2		heart valve		0	Yes	Yes	No	No	No		No	No	No			endocarditis
Liu J	2020	31919223	WHM-2020-03-001	0	9		blood			Yes	Yes	No	No	No		No	No	Yes	Implantable defibrillator		endocarditis
Liu J	2020	31919223	WHM-2020-03-002	0	3		blood			Yes	No	No	No	No		No	No	No			bacteraemia without focus
Petrovic Fabijan A	2020	32066959	WHM-2020-04-001	0	2		blood		0	Yes	Yes	No	No	No		No	No	Yes	Other		endocarditis
Petrovic Fabijan A	2020	32066959	WHM-2020-04-003	0	10		blood,bone,heart valve		7	Yes	Yes	No	No	No		No	No	No			endocarditis
Petrovic Fabijan A	2020	32066959	WHM-2020-04-004	0	3		blood		1	Yes	No	Yes	No	Yes	Spinal epidural abscess	No	No	No			bacteraemia with focus
Petrovic Fabijan A	2020	32066959	WHM-2020-04-005	0	2		blood		1	Yes	No	Yes	No	Yes	Spinal epidural abscess	No	No	No			bacteraemia with focus
Petrovic Fabijan A	2020	32066959	WHM-2020-04-006	0	3		blood		0	Yes	Yes	No	No	No		No	No	Yes	Other		endocarditis
Petrovic Fabijan A	2020	32066959	WHM-2020-04-007	0	3		blood,bone		3	Yes	No	Yes	No	No		No	No	No			bacteraemia with focus
Petrovic Fabijan A	2020	32066959	WHM-2020-04-008	0	3		blood		2	Yes	Yes	No	No	No		Yes	No	No			endocarditis
Petrovic Fabijan A	2020	32066959	WHM-2020-04-009	0	2		blood		1	Yes	Yes	No	No	No		No	No	Yes	Other		endocarditis
Petrovic Fabijan A	2020	32066959	WHM-2020-04-010	0	5		blood,bone		11	Yes	Yes	No	No	No		No	No	Yes	Other		endocarditis
Petrovic Fabijan A	2020	32066959	WHM-2020-04-012	0	6		blood		1	Yes	No	No	No	Yes	Spinal epidural abscess	No	No	No			bacteraemia with focus
Petrovic Fabijan A	2020	32066959	WHM-2020-04-013	0	16		blood,bone,heart valve		6	Yes	Yes	No	No	No		No	No	Yes	Other		endocarditis
Petrovic Fabijan A	2020	32066959	WHM-2020-04-014	0	2		blood		0	Yes	Yes	No	No	No		No	No	No			endocarditis
Tong SYC	2020	32044943	WHT-0201-003				blood		5	Yes	No	No	Yes	No		No	No	No			bacteraemia without focus
Tong SYC	2020	32044943	WHT-0202-003				blood		3	Yes	No	No	Yes	No		Yes	No	No			bacteraemia with focus
Tong SYC	2020	32044943	WHT-0202-009				blood		3	Yes	No	No	Yes	No		No	No	No			bacteraemia without focus
Tong SYC	2020	32044943	WHT-0202-022				blood		1	Yes	Yes	No	No	No		No	No	No			endocarditis
Tong SYC	2020	32044943	WHT-0203-001				blood		10	Yes	Yes	No	No	No		No	No	Yes	Intravascular graft		endocarditis
Tong SYC	2020	32044943	WHT-0203-002				blood		5	Yes	No	No	Yes	No		No	No	No			bacteraemia without focus
Tong SYC	2020	32044943	WHT-0203-004				blood		3	Yes	Yes	No	No	No		No	Yes	No			endocarditis
Tong SYC	2020	32044943	WHT-0203-015				blood		3	Yes	No	No	No	No		No	No	No			bacteraemia without focus
Tong SYC	2020	32044943	WHT-0203-017				blood		2	Yes	No	No	Yes	No		Yes	No	No			bacteraemia with focus
Tong SYC	2020	32044943	WHT-0203-018				blood		3	Yes	No	No	No	No		No	No	Yes	Pacemaker		bacteraemia with focus
Tong SYC	2020	32044943	WHT-0301-001				blood		1	Yes	No	No	No	No		No	No	Yes	Prosthetic joint		bacteraemia with focus
Tong SYC	2020	32044943	WHT-0301-040				blood		2	Yes	No	No	Yes	No		No	No	No			bacteraemia without focus
Tong SYC	2020	32044943	WHT-0302-003				blood		366	Yes	No	Yes	No	No		No	No	No			bacteraemia with focus
Tong SYC	2020	32044943	WHT-0302-009				blood		2	Yes	No	Yes	No	No		No	No	No			bacteraemia with focus
Tong SYC	2020	32044943	WHT-0302-012				blood		5	Yes	No	No	No	No		No	No	Yes	Intravascular graft		bacteraemia with focus
Tong SYC	2020	32044943	WHT-0302-018				blood		30	Yes	No	Yes	No	No		No	No	No			bacteraemia with focus
Tong SYC	2020	32044943	WHT-0302-021				blood		2	Yes	No	No	Yes	No		No	No	No			bacteraemia without focus
Tong SYC	2020	32044943	WHT-0302-029				blood		2	Yes	No	No	No	No		Yes	No	No			bacteraemia with focus
Tong SYC	2020	32044943	WHT-0302-032				blood		0	Yes	No	No	Yes	No		No	No	No			bacteraemia without focus
Tong SYC	2020	32044943	WHT-0302-038				blood		2	Yes	No	No	Yes	No		No	No	No			bacteraemia without focus
Tong SYC	2020	32044943	WHT-0302-047				blood		14	Yes	Yes	No	Yes	No		No	No	No			endocarditis
Tong SYC	2020	32044943	WHT-0302-060				blood		2	Yes	No	No	No	No		No	No	No			bacteraemia without focus
Tong SYC	2020	32044943	WHT-0302-062				blood		6	Yes	No	Yes	Yes	No		Yes	No	No			bacteraemia with focus
Tong SYC	2020	32044943	WHT-0302-064				blood		1	Yes	No	No	No	No		No	No	No			bacteraemia without focus
Tong SYC	2020	32044943	WHT-0302-079				blood		1	Yes	No	No	No	No		No	Yes	No			bacteraemia without focus
Tong SYC	2020	32044943	WHT-0303-013				blood		8	Yes	No	Yes	No	No		No	No	No			bacteraemia with focus
Tong SYC	2020	32044943	WHT-0303-018				blood		20	Yes	No	No	No	No		No	No	Yes	Other		bacteraemia with focus
Tong SYC	2020	32044943	WHT-0303-021				blood		83	Yes	No	No	No	No		No	No	No			bacteraemia without focus
Tong SYC	2020	32044943	WHT-0303-026				blood		5	Yes	No	No	No	No		No	No	No			bacteraemia without focus
Tong SYC	2020	32044943	WHT-0303-029				blood		5	Yes	No	No	No	No		No	No	No			bacteraemia without focus
Tong SYC	2020	32044943	WHT-0303-031				blood		10	Yes	No	No	No	No		No	No	No			bacteraemia without focus
Tong SYC	2020	32044943	WHT-0304-016				blood		23	Yes	Yes	No	No	Yes	Brain abscess	No	No	Yes	Other,Other		endocarditis
Tong SYC	2020	32044943	WHT-0304-017				blood		14	Yes	No	No	No	No		No	No	No			bacteraemia without focus
Tong SYC	2020	32044943	WHT-0304-018				blood		97	Yes	No	No	No	No		No	No	No			bacteraemia without focus
Tong SYC	2020	32044943	WHT-0304-032				blood		19	Yes	No	Yes	No	No		No	No	No			bacteraemia with focus
Tong SYC	2020	32044943	WHT-0306-006				blood		3	Yes	No	No	Yes	No		No	No	No			bacteraemia without focus
Tong SYC	2020	32044943	WHT-0306-010				blood		5	Yes	No	No	No	No		No	No	No			bacteraemia without focus
Tong SYC	2020	32044943	WHT-0306-027				blood		1	Yes	No	No	Yes	No		No	No	No			bacteraemia without focus
Tong SYC	2020	32044943	WHT-0307-016				blood		1	Yes	No	No	No	No		No	No	No			bacteraemia without focus
Tong SYC	2020	32044943	WHT-0307-022				blood		5	Yes	No	No	No	No		No	No	No			bacteraemia without focus
Tong SYC	2020	32044943	WHT-0307-027				blood		1	Yes	No	No	No	No		No	No	No			bacteraemia without focus
Tong SYC	2020	32044943	WHT-0307-030				blood		4	Yes	No	Yes	No	No		No	No	No			bacteraemia with focus
Tong SYC	2020	32044943	WHT-0307-031				blood		96	Yes	No	No	Yes	No		No	No	No			bacteraemia without focus
Tong SYC	2020	32044943	WHT-0307-036				blood		6	Yes	No	Yes	Yes	Yes	Spinal epidural abscess	No	No	No			bacteraemia with focus
Tong SYC	2020	32044943	WHT-0307-037				blood		6	Yes	No	No	Yes	No		No	No	No			bacteraemia without focus
Tong SYC	2020	32044943	WHT-0307-039				blood		2	Yes	No	No	No	No		No	No	Yes	Implantable defibrillator		bacteraemia with focus
Tong SYC	2020	32044943	WHT-0307-046				blood		11	Yes	No	No	No	No		No	No	No			bacteraemia without focus
Tong SYC	2020	32044943	WHT-0308-008				blood		3	Yes	No	No	No	Yes	Spinal epidural abscess	No	No	No			bacteraemia with focus
Tong SYC	2020	32044943	WHT-0308-016				blood		5	Yes	No	No	No	No		No	No	Yes	Other orthopaedic device		bacteraemia with focus
Tong SYC	2020	32044943	WHT-0308-023				blood		2	Yes	Yes	No	Yes	No		No	No	No			endocarditis
Tong SYC	2020	32044943	WHT-0308-027				blood		5	Yes	No	No	Yes	No		Yes	No	No			bacteraemia with focus
Tong SYC	2020	32044943	WHT-0308-043				blood		2	Yes	No	No	Yes	No		No	No	No			bacteraemia without focus
Tong SYC	2020	32044943	WHT-0308-046				blood		8	Yes	Yes	Yes	Yes	No		No	No	No			endocarditis
Tong SYC	2020	32044943	WHT-0308-059				blood		4	Yes	No	Yes	No	No		No	No	No			bacteraemia with focus
Tong SYC	2020	32044943	WHT-0308-062				blood		5	Yes	No	Yes	No	No		No	No	No			bacteraemia with focus
Tong SYC	2020	32044943	WHT-0308-070				blood		8	Yes	No	No	No	No		No	No	No			bacteraemia without focus
Tong SYC	2020	32044943	WHT-0308-073				blood		4	Yes	No	No	Yes	No		No	Yes	No			bacteraemia without focus
Tong SYC	2020	32044943	WHT-0308-074				blood		1	Yes	No	Yes	No	No		No	No	No			bacteraemia with focus
Tong SYC	2020	32044943	WHT-0308-079				blood		9	Yes	No	No	No	Yes	Spinal epidural abscess	No	No	No			bacteraemia with focus
Tong SYC	2020	32044943	WHT-0308-084				blood		3	Yes	Yes	No	No	No		No	No	No			endocarditis
Tong SYC	2020	32044943	WHT-0309-012				blood		2	Yes	No	No	No	No		No	No	Yes	Prosthetic joint,Other		bacteraemia with focus
Tong SYC	2020	32044943	WHT-0309-014				blood		3	Yes	Yes	No	Yes	No		No	No	No			endocarditis
Tong SYC	2020	32044943	WHT-0309-030				blood		14	Yes	No	No	No	No		No	No	No			bacteraemia without focus
Tong SYC	2020	32044943	WHT-0309-032				blood		6	Yes	No	Yes	No	No		No	No	No			bacteraemia with focus
Tong SYC	2020	32044943	WHT-0309-033				blood		2	Yes	No	Yes	No	No		No	No	No			bacteraemia with focus
Tong SYC	2020	32044943	WHT-0401-006				blood		15	Yes	No	Yes	Yes	No		No	No	No			bacteraemia with focus
Tong SYC	2020	32044943	WHT-0401-017				blood		1	Yes	No	No	Yes	No		No	No	No			bacteraemia without focus
Tong SYC	2020	32044943	WHT-0401-027				blood		1	Yes	Yes	No	Yes	No		Yes	No	No			endocarditis
Tong SYC	2020	32044943	WHT-0401-038				blood		3	Yes	No	No	No	No		Yes	No	No			bacteraemia with focus
Tong SYC	2020	32044943	WHT-0401-041				blood		1	Yes	No	No	No	No		Yes	No	No			bacteraemia with focus
Tong SYC	2020	32044943	WHT-0401-044				blood		4	Yes	No	No	No	No		Yes	No	No			bacteraemia with focus
Tong SYC	2020	32044943	WHT-0401-053				blood			Yes	No	Yes	Yes	No		No	No	No			bacteraemia with focus
Tong SYC	2020	32044943	WHT-0402-001				blood		2	Yes	No	Yes	No	No		No	No	No			bacteraemia with focus
Tong SYC	2020	32044943	WHT-0402-005				blood		9	Yes	No	No	No	No		No	No	No			bacteraemia without focus
Tong SYC	2020	32044943	WHT-0402-006				blood		12	Yes	No	No	No	No		Yes	No	No			bacteraemia with focus
Tong SYC	2020	32044943	WHT-0402-007				blood		4	Yes	No	Yes	No	No		No	No	No			bacteraemia with focus
Tong SYC	2020	32044943	WHT-0402-008				blood		4	Yes	No	No	Yes	No		No	No	No			bacteraemia without focus
Tong SYC	2020	32044943	WHT-0402-012				blood		2	Yes	No	No	Yes	No		No	No	No			bacteraemia without focus
Tong SYC	2020	32044943	WHT-0402-014				blood		1	Yes	No	No	No	No		No	No	Yes	Other		bacteraemia with focus
Tong SYC	2020	32044943	WHT-0402-024				blood		5	Yes	No	No	Yes	No		No	No	No			bacteraemia without focus
Tong SYC	2020	32044943	WHT-0402-025				blood		7	Yes	No	Yes	Yes	No		Yes	No	No			bacteraemia with focus
Tong SYC	2020	32044943	WHT-0402-038				blood		5	Yes	No	No	No	No		No	No	Yes	Prosthetic joint		bacteraemia with focus
Tong SYC	2020	32044943	WHT-0403-002				blood		2	Yes	No	No	No	No		Yes	No	No			bacteraemia with focus
Tong SYC	2020	32044943	WHT-0403-006				blood		1	Yes	No	No	Yes	No		No	No	No			bacteraemia without focus
Tong SYC	2020	32044943	WHT-0403-013				blood		1	Yes	No	No	No	No		No	No	No			bacteraemia without focus
Tong SYC	2020	32044943	WHT-0403-018				blood		2	Yes	No	No	No	No		No	No	No			bacteraemia without focus
Tong SYC	2020	32044943	WHT-0501-005				blood		5	Yes	No	No	No	No		Yes	No	No			bacteraemia with focus
Tong SYC	2020	32044943	WHT-0501-073				blood		104	Yes	No	Yes	Yes	No		No	No	No			bacteraemia with focus
Tong SYC	2020	32044943	WHT-0502-010				blood		4	Yes	No	Yes	Yes	No		No	Yes	No			bacteraemia with focus
Tong SYC	2020	32044943	WHT-0502-026				blood		54	Yes	No	No	Yes	Yes	Spinal epidural abscess	Yes	No	No			bacteraemia with focus
Tong SYC	2020	32044943	WHT-0601-003				blood		1	Yes	No	No	No	No		No	No	No			bacteraemia without focus
Tong SYC	2020	32044943	WHT-0601-014				blood		1	Yes	No	No	No	No		No	No	No			bacteraemia without focus
Tong SYC	2020	32044943	WHT-0601-015				blood		39	Yes	No	No	No	No		Yes	No	Yes	Implantable defibrillator		bacteraemia with focus
Tong SYC	2020	32044943	WHT-0601-043				blood		2	Yes	No	Yes	No	No		No	No	No			bacteraemia with focus
Tong SYC	2020	32044943	WHT-0601-049				blood		1	Yes	No	Yes	No	No		No	No	No			bacteraemia with focus
Tong SYC	2020	32044943	WHT-0601-050				blood		73	Yes	No	Yes	No	No		No	No	Yes	Implantable defibrillator		bacteraemia with focus
Tong SYC	2020	32044943	WHT-0601-056				blood		1	Yes	No	No	Yes	No		No	No	No			bacteraemia without focus
Tong SYC	2020	32044943	WHT-0602-017				blood		6	Yes	No	No	No	No		Yes	No	No			bacteraemia with focus
Tong SYC	2020	32044943	WHT-0602-034				blood		8	Yes	No	No	No	No		No	No	No			bacteraemia without focus
Tong SYC	2020	32044943	WHT-0602-045				blood		7	Yes	Yes	No	No	No		No	No	No			endocarditis
Tong SYC	2020	32044943	WHT-0602-046				blood		0	Yes	No	No	Yes	No		No	No	No			bacteraemia without focus
Tong SYC	2020	32044943	WHT-0602-047				blood		2	Yes	No	No	No	No		Yes	No	No			bacteraemia with focus
Tong SYC	2020	32044943	WHT-0602-057				blood		3	Yes	No	No	Yes	No		Yes	No	No			bacteraemia with focus
Tong SYC	2020	32044943	WHT-0701-002				blood		14	Yes	No	No	No	No		No	No	No			bacteraemia without focus
Tong SYC	2020	32044943	WHT-0701-056				blood		54	Yes	No	No	No	No		No	No	No			bacteraemia without focus
Tong SYC	2020	32044943	WHT-0701-062				blood		1	Yes	No	No	Yes	No		No	No	No			bacteraemia without focus
Tong SYC	2020	32044943	WHT-0701-077				blood		18	Yes	No	No	No	No		No	No	No			bacteraemia without focus
Tong SYC	2020	32044943	WHT-0702-003				blood		6	Yes	No	No	No	No		No	No	No			bacteraemia without focus
Tong SYC	2020	32044943	WHT-0702-005				blood		91	Yes	No	Yes	Yes	No		No	No	No			bacteraemia with focus
Tong SYC	2020	32044943	WHT-0702-008				blood		377	Yes	No	Yes	Yes	No		No	No	No			bacteraemia with focus
Tong SYC	2020	32044943	WHT-0702-026				blood		2	Yes	No	Yes	No	No		No	No	No			bacteraemia with focus
Tong SYC	2020	32044943	WHT-0702-029				blood		6	Yes	No	No	Yes	No		No	No	No			bacteraemia without focus
Tong SYC	2020	32044943	WHT-0703-013				blood		16	Yes	No	No	No	No		No	No	No			bacteraemia without focus
Tong SYC	2020	32044943	WHT-0703-043				blood		3	Yes	Yes	No	No	No		No	No	No			endocarditis
Tong SYC	2020	32044943	WHT-0703-065				blood		81	Yes	Yes	No	Yes	No		No	No	No			endocarditis
Tong SYC	2020	32044943	WHT-0703-067				blood		1	Yes	No	No	No	No		No	No	No			bacteraemia without focus
Tong SYC	2020	32044943	WHT-0703-068				blood		2	Yes	Yes	No	Yes	No		No	No	No			endocarditis
Tong SYC	2020	32044943	WHT-0703-080				blood		23	Yes	Yes	No	No	No		No	No	No			endocarditis
Tong SYC	2020	32044943	WHT-0703-085				blood		4	Yes	Yes	Yes	No	No		No	No	No			endocarditis
Tong SYC	2020	32044943	WHT-0703-090				blood		30	Yes	Yes	Yes	No	No		No	No	No			endocarditis
Tong SYC	2020	32044943	WHT-0703-091				blood		1	Yes	No	No	No	No		No	No	No			bacteraemia without focus
Tong SYC	2020	32044943	WHT-0703-111				blood		2	Yes	No	No	Yes	No		No	No	No			bacteraemia without focus
Tong SYC	2020	32044943	WHT-0703-114				blood		13	Yes	No	No	No	No		No	No	No			bacteraemia without focus
Tong SYC	2020	32044943	WHT-0810-024				blood		6	Yes	No	Yes	Yes	No		No	No	No			bacteraemia with focus
Tong SYC	2020	32044943	WHT-0810-046				blood		3	Yes	No	Yes	Yes	No		No	No	No			bacteraemia with focus
Tong SYC	2020	32044943	WHT-0810-058				blood		4	Yes	No	No	Yes	No		Yes	No	No			bacteraemia with focus
Tong SYC	2020	32044943	WHT-0810-060				blood		13	Yes	No	Yes	No	No		No	No	No			bacteraemia with focus
Tong SYC	2020	32044943	WHT-0901-012				blood		18	Yes	No	No	No	No		No	No	Yes	Intravascular graft		bacteraemia with focus
Tong SYC	2020	32044943	WHT-0901-029				blood		4	Yes	No	No	No	No		No	No	No			bacteraemia without focus
Tong SYC	2020	32044943	WHT-0901-073				blood		3	Yes	No	No	No	No		No	No	No			bacteraemia without focus
Tong SYC	2020	32044943	WHT-0901-102				blood		23	Yes	No	No	No	Yes	Spinal epidural abscess	No	No	No			bacteraemia with focus
Tong SYC	2020	32044943	WHT-0901-112				blood		1	Yes	No	No	No	No		No	No	No			bacteraemia without focus
Tong SYC	2020	32044943	WHT-0901-115				blood		9	Yes	No	No	No	No		Yes	No	No			bacteraemia with focus
Tong SYC	2020	32044943	WHT-0901-122				blood		5	Yes	No	No	No	No		No	No	No			bacteraemia without focus
Tong SYC	2020	32044943	WHT-0901-123				blood		6	Yes	No	No	No	No		No	No	No			bacteraemia without focus
Tong SYC	2020	32044943	WHT-0901-124				blood		5	Yes	No	No	No	No		No	No	No			bacteraemia without focus
Tong SYC	2020	32044943	WHT-0901-129				blood		5	Yes	No	Yes	No	No		No	No	No			bacteraemia with focus
Tong SYC	2020	32044943	WHT-0901-131				blood		30	Yes	No	No	No	No		No	No	No			bacteraemia without focus

## Sheet: Variables
Variable	Comment
first_author
pub_year	Publication year
PMID	Pubmed ID f the publication
episode_id
n_colonising	Number of colonising strains
n_invasive	Number of invasive strains
colonising_sites
invasive_sites
timespan_colonising	Days between first and last colonising strain
timespan_invasive	Days between first and last colonising strain
bacteraemia
endocarditis
osteoarticular_infection
skin_infection
neurological_infection
neurological_infection_type
pulmonary_infection
abdominal_infection
implant_infection
implant_infection_type
colonising_group
invasive_group
