# Supplementary material for: Niche-specific genome degradation and convergent evolution shaping Staphylococcus aureus adaptation during severe infections
Source: eLife journal article supplement (doi:10.7554/elife.77195), 2022-06-08
Supplement: supp [file elife-77195-supp-v1.zip › elife_poa_e77195_Supplementary_file_2.xlsx]

## Sheet: Dataset
List of strains with metadata
sequence_accession	sample_alias	bioproject	biosample	first_author	pub_year	PMID	episode_id	internal_ref	index_invasive	site	compartment	collection_day	ST	mecA	n_snippy	n_noref	n_mask	mapping_ref	mash_distance	sequence_type	n_reads	reads_yield	reads_length	reads_depth	frac_reads_saureus	n_contigs	genome_size	N50	pct_GC
ERR866460	Staphylococcus aureus Sa_BPH1105	PRJEB9193	SAMEA3360141	Gao W	2015	28348811	WHM-2010-01-001			blood	invasive	6	5	Yes	5	5	5	Sa_JKD6210	0	reads	1301520	196529520	151	70	92.4	120	2747438	58707	32.72
ERR866461	Staphylococcus aureus Sa_BPH1106	PRJEB9193	SAMEA3360127	Gao W	2015	28348811	WHM-2010-01-001			blood	invasive	6	5	Yes	13	13	5	Sa_JKD6210	0	reads	1519902	391581678	257	140	93.95	76	2749449	113994	32.71
ERR866462	Staphylococcus aureus Sa_BPH1113	PRJEB9193	SAMEA3360128	Gao W	2015	28348811	WHM-2010-01-001			blood	invasive	13	5	Yes	3	3	3	Sa_JKD6210	0	reads	1180266	178220166	151	63	92.42	169	2738371	35958	32.75
ERR866463	Staphylococcus aureus Sa_BPH1115	PRJEB9193	SAMEA3360140	Gao W	2015	28348811	WHM-2010-01-001			blood	invasive	15	5	Yes	6	6	6	Sa_JKD6210	0	reads	1310602	197900902	151	70	93.87	107	2749915	65788	32.72
ERR866464	Staphylococcus aureus Sa_BPH1116	PRJEB9193	SAMEA3360131	Gao W	2015	28348811	WHM-2010-01-001			blood	invasive	46	5	Yes	6	6	6	Sa_JKD6210	0	reads	1359184	205236784	151	73	92.95	152	2717286	46818	32.78
ERR866465	Staphylococcus aureus Sa_BPH1116G20	PRJEB9193	SAMEA3360142	Gao W	2015	28348811	WHM-2010-01-001			blood	invasive	46	5	Yes	14	14	9	Sa_JKD6210	0	reads	1315346	336767139	256	120	92.77	51	2731021	272063	32.74
ERR866466	Staphylococcus aureus Sa_BPH1117	PRJEB9193	SAMEA3360139	Gao W	2015	28348811	WHM-2010-01-001			blood	invasive	46	5	Yes	8	8	8	Sa_JKD6210	0	reads	2417942	365109242	151	130	92.18	68	2737024	163096	32.77
ERR866467	Staphylococcus aureus Sa_BPH1118	PRJEB9193	SAMEA3360136	Gao W	2015	28348811	WHM-2010-01-001			blood	invasive	48	5	Yes	10	10	10	Sa_JKD6210	0	reads	2406792	363425592	151	130	94.75	66	2731663	169391	32.77
ERR866468	Staphylococcus aureus Sa_BPH1120	PRJEB9193	SAMEA3360125	Gao W	2015	28348811	WHM-2010-01-001			blood	invasive	49	5	Yes	8	8	8	Sa_JKD6210	0	reads	2999860	452978860	151	162	95.07	45	2733609	252775	32.76
ERR866469	Staphylococcus aureus Sa_BPH1122	PRJEB9193	SAMEA3360129	Gao W	2015	28348811	WHM-2010-01-001			blood	invasive	51	5	Yes	8	8	8	Sa_JKD6210	0	reads	608652	124364679	204	44	95.39	105	2725736	66081	32.75
ERR866470	Staphylococcus aureus Sa_BPH1123	PRJEB9193	SAMEA3360137	Gao W	2015	28348811	WHM-2010-01-001			blood	invasive	51	5	Yes	9	9	9	Sa_JKD6210	0	reads	1240608	187331808	151	67	77.69	110	2726064	69716	32.75
ERR866471	Staphylococcus aureus Sa_BPH1136	PRJEB9193	SAMEA3360132	Gao W	2015	28348811	WHM-2010-01-001			blood	invasive	58	5	Yes	10	10	10	Sa_JKD6210	0	reads	1105636	166951036	151	59	72.58	130	2721895	51363	32.76
ERR866472	Staphylococcus aureus Sa_BPH1141	PRJEB9193	SAMEA3360135	Gao W	2015	28348811	WHM-2010-01-001			blood	invasive	62	5	Yes	12	12	12	Sa_JKD6210	0	reads	2725166	411500066	151	147	95.17	85	2739355	163102	32.78
ERR866473	Staphylococcus aureus Sa_BPH1142	PRJEB9193	SAMEA3360138	Gao W	2015	28348811	WHM-2010-01-001			blood	invasive	114	5	Yes	11	11	11	Sa_JKD6210	0	reads	2677268	404267468	151	144	94.99	74	2737049	252730	32.77
ERR866474	Staphylococcus aureus Sa_BPH1143	PRJEB9193	SAMEA3360134	Gao W	2015	28348811	WHM-2010-01-001			blood	invasive	114	5	Yes	11	11	11	Sa_JKD6210	0	reads	2603468	393123668	151	140	94.3	73	2736668	169729	32.78
ERR866475	Staphylococcus aureus Sa_BPH1146	PRJEB9193	SAMEA3360133	Gao W	2015	28348811	WHM-2010-01-001			blood	invasive	114	5	Yes	10	10	10	Sa_JKD6210	0	reads	1797676	271449076	151	97	80.14	88	2724812	88151	32.75
Sa_JKD6210	Staphylococcus aureus Sa_JKD6210			Gao W	2015	28348811	WHM-2010-01-001	Yes	Yes	blood	invasive	0	5	Yes				Sa_JKD6210	0	assembly						2	2774905	2749902	32.8
Sa_JKD6229	Staphylococcus aureus Sa_JKD6229			Gao W	2015	28348811	WHM-2010-01-001			blood	invasive	116	-	Yes	37	37	36	Sa_JKD6210	0	assembly						1	2847259	2847259	32.8
SRR088295	Sa_JKD6000	SRA027352	SAMN00188869	Howden BP	2011	22102812	WHM-2011-01-001	Yes	Yes	blood	invasive	0	239	Yes				GCF_004136255.1	0	reads	16589316	597215376	36	214	45.42	1080	2986028	48882	32.66
SRR088296	Sa_JKD6001	SRA027352	SAMN00188872	Howden BP	2011	22102812	WHM-2011-01-001			blood	invasive	13	239	Yes	7	3	2	GCF_004136255.1	0	reads	15043422	541563192	36	194	73.23	991	2946356	52044	32.66
GCF_000145595.1	Sa_JKD6008	PRJNA29567	SAMN02603619	Howden BP	2011	22102812	WHM-2011-01-002			blood	invasive	42	239	Yes	69	69	63	GCF_000145595.1	0	assembly						1	2924344	2924344	32.89
GCF_000172855.1	Sa_JKD6009	PRJNA29569	SAMN02470553	Howden BP	2011	22102812	WHM-2011-01-002	Yes	Yes	skin	invasive	0	239	Yes				GCF_000145595.1	0	assembly						129	2819448	46109	32.68
SRR088299	Sa_JKD6021	SRA027352	SAMN00188875	Howden BP	2011	22102812	WHM-2011-01-003	Yes	Yes	blood	invasive	0	239	Yes				GCF_005890015.1	0	reads	11279396	406058256	36	145	50.63	1022	2907555	42517	32.75
SRR088300	Sa_JKD6023	SRA027352	SAMN00188876	Howden BP	2011	22102812	WHM-2011-01-003			blood	invasive	15	239	Yes	17	11	8	GCF_005890015.1	0	reads	12913626	464890536	36	166	70.04	1007	2896915	43018	32.75
SRR088301	Sa_JKD6051	SRA027352	SAMN00188877	Howden BP	2011	22102812	WHM-2011-01-004			blood	invasive	32	239	Yes	11	7	6	GCF_900607245.1	0	reads	8315482	299357352	36	107	53.21	798	2877061	42843	32.74
SRR088302	Sa_JKD6052	SRA027352	SAMN00188878	Howden BP	2011	22102812	WHM-2011-01-004	Yes	Yes	blood	invasive	0	239	Yes				GCF_900607245.1	0	reads	9439204	339811344	36	121	52.39	739	2875633	46187	32.73
SRR088297	Sa_JKD6004	SRA027352	SAMN00188873	Howden BP	2011	22102812	WHM-2011-01-005	Yes	Yes	blood	invasive	0	239	Yes				GCF_005890015.1	0	reads	9902862	356503032	36	127	54.04	1074	2878316	44756	32.76
SRR088298	Sa_JKD6005	SRA027352	SAMN00188874	Howden BP	2011	22102812	WHM-2011-01-005			blood	invasive	8	239	Yes	4	1	1	GCF_005890015.1	0	reads	10044162	361589832	36	129	49.07	1241	2904606	42230	32.76
ERR083741	C00001285	PRJEB2862	SAMEA1035575	Young BC	2012	22393007	WHM-2012-04-001			nose	colonising	56	15		2	1	0	GCF_001611325.1	0	reads	4191664	414974736	99	148	97.2	85	2680624	249798	32.72
ERR083742	C00001286	PRJEB2862	SAMEA1035627	Young BC	2012	22393007	WHM-2012-04-001			nose	colonising	56	15		3	1	0	GCF_001611325.1	0	reads	4588626	454273974	99	162	97.32	110	2682600	207990	32.73
ERR083743	C00001287	PRJEB2862	SAMEA1035656	Young BC	2012	22393007	WHM-2012-04-001			nose	colonising	56	15		3	1	0	GCF_001611325.1	0	reads	5592094	553617306	99	198	97.28	107	2682170	165333	32.73
ERR083744	C00001288	PRJEB2862	SAMEA1035667	Young BC	2012	22393007	WHM-2012-04-001			nose	colonising	56	15		3	1	1	GCF_001611325.1	0	reads	6925708	685645092	99	245	97.2	110	2682657	207943	32.73
ERR083745	C00001289	PRJEB2862	SAMEA1035512	Young BC	2012	22393007	WHM-2012-04-001	Yes		nose	colonising	56	15					GCF_001611325.1	0	reads	6036740	597637260	99	214	97.25	104	2681753	207943	32.72
ERR083746	C00001291	PRJEB2862	SAMEA1035538	Young BC	2012	22393007	WHM-2012-04-001			nose	colonising	56	15		6	5	4	GCF_001611325.1	0	reads	4551330	450581670	99	161	97.33	106	2681413	184741	32.72
ERR083747	C00001292	PRJEB2862	SAMEA1035568	Young BC	2012	22393007	WHM-2012-04-001			nose	colonising	56	15		1	0	0	GCF_001611325.1	0	reads	3755520	371796480	99	133	97.28	109	2682316	207943	32.73
ERR083748	C00001293	PRJEB2862	SAMEA1035597	Young BC	2012	22393007	WHM-2012-04-001			nose	colonising	56	15		2	0	0	GCF_001611325.1	0	reads	4202638	416061162	99	149	97.08	110	2682176	243016	32.72
ERR083749	C00001294	PRJEB2862	SAMEA1035614	Young BC	2012	22393007	WHM-2012-04-001			nose	colonising	56	15		2	1	1	GCF_001611325.1	0	reads	3876318	383755482	99	137	97.07	113	2683164	184741	32.73
ERR083750	C00001295	PRJEB2862	SAMEA1035604	Young BC	2012	22393007	WHM-2012-04-001			nose	colonising	56	15		6	5	4	GCF_001611325.1	0	reads	3270434	323772966	99	116	97.45	102	2681890	249796	32.73
ERR083751	C00001296	PRJEB2862	SAMEA1035626	Young BC	2012	22393007	WHM-2012-04-001			nose	colonising	56	15		2	1	0	GCF_001611325.1	0	reads	3917582	387840618	99	139	97.23	112	2682849	184746	32.73
ERR083752	C00001297	PRJEB2862	SAMEA1035638	Young BC	2012	22393007	WHM-2012-04-001			nose	colonising	56	15		5	5	4	GCF_001611325.1	0	reads	2988740	295885260	99	106	97.42	105	2682402	249798	32.73
ERR083753	C00001298	PRJEB2862	SAMEA1035664	Young BC	2012	22393007	WHM-2012-04-001			nose	colonising	56	15		2	1	1	GCF_001611325.1	0	reads	3028608	299832192	99	107	97.4	108	2682266	184741	32.73
ERR083754	C00001299	PRJEB2862	SAMEA1035610	Young BC	2012	22393007	WHM-2012-04-001			nose	colonising	56	15		6	4	3	GCF_001611325.1	0	reads	4941304	489189096	99	175	97.3	103	2682060	243016	32.72
ERR083755	C00001300	PRJEB2862	SAMEA1035602	Young BC	2012	22393007	WHM-2012-04-001			nose	colonising	56	15		7	7	6	GCF_001611325.1	0	reads	2741598	271418202	99	97	97.37	108	2682705	184746	32.73
ERR083756	C00001301	PRJEB2862	SAMEA1035620	Young BC	2012	22393007	WHM-2012-04-001			nose	colonising	56	15		4	3	2	GCF_001611325.1	0	reads	2691368	266445432	99	95	97.36	112	2682188	173268	32.73
ERR083757	C00001303	PRJEB2862	SAMEA1035561	Young BC	2012	22393007	WHM-2012-04-001			nose	colonising	56	15		4	3	2	GCF_001611325.1	0	reads	3154812	312326388	99	111	97.19	146	2685021	130979	32.74
ERR083758	C00001304	PRJEB2862	SAMEA1035588	Young BC	2012	22393007	WHM-2012-04-001			nose	colonising	56	15		6	5	4	GCF_001611325.1	0	reads	2846080	281761920	99	101	97.3	119	2683132	165378	32.73
ERR083759	C00001305	PRJEB2862	SAMEA1035526	Young BC	2012	22393007	WHM-2012-04-001			nose	colonising	56	15		3	2	1	GCF_001611325.1	0	reads	3293674	326073726	99	116	97.26	116	2683490	207943	32.73
ERR083760	C00001306	PRJEB2862	SAMEA1035546	Young BC	2012	22393007	WHM-2012-04-001			nose	colonising	56	15		5	5	4	GCF_001611325.1	0	reads	2900718	287171082	99	102	97.24	140	2684854	137624	32.73
ERR083761	C00001307	PRJEB2862	SAMEA1035534	Young BC	2012	22393007	WHM-2012-04-001			nose	colonising	126	15		5	4	3	GCF_001611325.1	0	reads	3504712	346966488	99	124	96.91	125	2683907	184741	32.74
ERR083762	C00001308	PRJEB2862	SAMEA1035654	Young BC	2012	22393007	WHM-2012-04-001			nose	colonising	126	15		2	1	1	GCF_001611325.1	0	reads	3637528	360115272	99	129	96.91	105	2682605	192448	32.73
ERR083763	C00001309	PRJEB2862	SAMEA1035644	Young BC	2012	22393007	WHM-2012-04-001			nose	colonising	126	15		5	4	3	GCF_001611325.1	0	reads	3512628	347750172	99	124	97.27	120	2683275	184741	32.73
ERR083764	C00001310	PRJEB2862	SAMEA1035532	Young BC	2012	22393007	WHM-2012-04-001			nose	colonising	126	15		6	5	4	GCF_001611325.1	0	reads	3307104	327403296	99	117	97.24	109	2682624	184746	32.73
ERR083765	C00001311	PRJEB2862	SAMEA1035506	Young BC	2012	22393007	WHM-2012-04-001			nose	colonising	126	15		5	4	3	GCF_001611325.1	0	reads	3559344	352375056	99	126	96.86	135	2684391	207943	32.74
ERR083766	C00001312	PRJEB2862	SAMEA1035523	Young BC	2012	22393007	WHM-2012-04-001			nose	colonising	126	15		5	4	3	GCF_001611325.1	0	reads	4020530	398032470	99	142	96.96	124	2684009	243021	32.74
ERR083767	C00001314	PRJEB2862	SAMEA1035584	Young BC	2012	22393007	WHM-2012-04-001			nose	colonising	126	15		3	2	1	GCF_001611325.1	0	reads	3609428	357333372	99	128	97.45	99	2680967	243016	32.72
ERR083768	C00001317	PRJEB2862	SAMEA1035567	Young BC	2012	22393007	WHM-2012-04-001			nose	colonising	126	15		4	3	3	GCF_001611325.1	0	reads	3846708	380824092	99	136	97.21	121	2683356	165378	32.73
ERR083769	C00001319	PRJEB2862	SAMEA1035611	Young BC	2012	22393007	WHM-2012-04-001			nose	colonising	183	15		4	3	2	GCF_001611325.1	0	reads	3521764	348654636	99	125	97.17	120	2683090	184741	32.73
ERR083770	C00001320	PRJEB2862	SAMEA1035635	Young BC	2012	22393007	WHM-2012-04-001			nose	colonising	183	15		4	3	2	GCF_001611325.1	0	reads	3434556	340021044	99	121	97.23	115	2683043	184741	32.73
ERR083771	C00001321	PRJEB2862	SAMEA1035651	Young BC	2012	22393007	WHM-2012-04-001			nose	colonising	183	15		4	3	2	GCF_001611325.1	0	reads	3639162	360277038	99	129	97.1	132	2684870	165333	32.74
ERR083772	C00001324	PRJEB2862	SAMEA1035643	Young BC	2012	22393007	WHM-2012-04-001			nose	colonising	183	15		3	2	2	GCF_001611325.1	0	reads	3379030	334523970	99	119	97.17	108	2682924	200116	32.73
ERR083773	C00001325	PRJEB2862	SAMEA1035530	Young BC	2012	22393007	WHM-2012-04-001			nose	colonising	183	15		3	3	2	GCF_001611325.1	0	reads	2665836	263917764	99	94	97.21	131	2684017	165378	32.73
ERR083774	C00001326	PRJEB2862	SAMEA1035551	Young BC	2012	22393007	WHM-2012-04-001			nose	colonising	183	15		3	2	2	GCF_001611325.1	0	reads	3587562	355168638	99	127	97.18	113	2682994	199936	32.73
ERR083775	C00001327	PRJEB2862	SAMEA1035581	Young BC	2012	22393007	WHM-2012-04-001			nose	colonising	183	15		3	3	2	GCF_001611325.1	0	reads	2339428	231603372	99	83	97.11	164	2685775	148137	32.74
ERR083776	C00001328	PRJEB2862	SAMEA1035615	Young BC	2012	22393007	WHM-2012-04-001			nose	colonising	242	15		6	4	3	GCF_001611325.1	0	reads	3268402	323571798	99	116	97.36	105	2681893	184741	32.73
ERR083777	C00001329	PRJEB2862	SAMEA1035607	Young BC	2012	22393007	WHM-2012-04-001			nose	colonising	242	15		6	4	3	GCF_001611325.1	0	reads	4452312	440778888	99	158	97.14	96	2681425	207943	32.72
ERR083778	C00001330	PRJEB2862	SAMEA1035618	Young BC	2012	22393007	WHM-2012-04-001			nose	colonising	242	15		5	4	3	GCF_001611325.1	0	reads	3181282	314946918	99	112	97.32	100	2681638	194158	32.72
ERR083779	C00001331	PRJEB2862	SAMEA1035639	Young BC	2012	22393007	WHM-2012-04-001			nose	colonising	242	15		5	3	2	GCF_001611325.1	0	reads	2776554	274878846	99	98	97.51	88	2680781	179435	32.72
ERR083780	C00001332	PRJEB2862	SAMEA1035672	Young BC	2012	22393007	WHM-2012-04-001			nose	colonising	242	15		5	3	3	GCF_001611325.1	0	reads	4216514	417434886	99	149	97.21	111	2682526	179480	32.73
ERR083781	C00001333	PRJEB2862	SAMEA1035522	Young BC	2012	22393007	WHM-2012-04-001			nose	colonising	242	15		5	4	3	GCF_001611325.1	0	reads	4109736	406863864	99	145	97.04	131	2683716	144989	32.73
ERR083782	C00001334	PRJEB2862	SAMEA1035547	Young BC	2012	22393007	WHM-2012-04-001			nose	colonising	242	15		3	2	2	GCF_001611325.1	0	reads	2870568	284186232	99	101	97.36	107	2682559	249798	32.73
ERR083783	C00001335	PRJEB2862	SAMEA1035560	Young BC	2012	22393007	WHM-2012-04-001			nose	colonising	242	15		4	3	2	GCF_001611325.1	0	reads	2654886	262833714	99	94	97.3	115	2682335	184746	32.73
ERR083784	C00001336	PRJEB2862	SAMEA1035637	Young BC	2012	22393007	WHM-2012-04-001			nose	colonising	242	15		3	2	2	GCF_001611325.1	0	reads	3081680	305086320	99	109	97.25	135	2684490	184741	32.74
ERR083785	C00001337	PRJEB2862	SAMEA1035659	Young BC	2012	22393007	WHM-2012-04-001			nose	colonising	242	15		5	4	3	GCF_001611325.1	0	reads	3669180	363248820	99	130	97.16	124	2683397	165367	32.73
ERR083786	C00001338	PRJEB2862	SAMEA1035606	Young BC	2012	22393007	WHM-2012-04-001			nose	colonising	358	15		12	10	9	GCF_001611325.1	0	reads	3534822	349947378	99	125	97.31	113	2683139	179480	32.73
ERR083787	C00001339	PRJEB2862	SAMEA1035622	Young BC	2012	22393007	WHM-2012-04-001			nose	colonising	358	15		13	12	11	GCF_001611325.1	0	reads	3467502	343282698	99	123	97.11	123	2683334	142030	32.73
ERR083788	C00001340	PRJEB2862	SAMEA1035631	Young BC	2012	22393007	WHM-2012-04-001			nose	colonising	358	15		13	11	10	GCF_001611325.1	0	reads	3674704	363795696	99	130	97.28	117	2682865	207943	32.73
ERR083789	C00001341	PRJEB2862	SAMEA1035563	Young BC	2012	22393007	WHM-2012-04-001			nose	colonising	358	15		11	10	9	GCF_001611325.1	0	reads	3093994	306305406	99	109	97.21	118	2682601	243016	32.73
ERR083790	C00001342	PRJEB2862	SAMEA1035590	Young BC	2012	22393007	WHM-2012-04-001			nose	colonising	358	15		11	9	9	GCF_001611325.1	0	reads	4025562	398530638	99	142	97.22	115	2683335	184740	32.73
ERR083791	C00001343	PRJEB2862	SAMEA1035514	Young BC	2012	22393007	WHM-2012-04-001			nose	colonising	358	15		10	10	10	GCF_001611325.1	0	reads	3118828	308763972	99	110	97.09	152	2685398	121464	32.74
ERR083792	C00001344	PRJEB2862	SAMEA1035533	Young BC	2012	22393007	WHM-2012-04-001			nose	colonising	358	15		13	12	11	GCF_001611325.1	0	reads	3287032	325416168	99	116	97.37	105	2681884	207943	32.72
ERR083793	C00001345	PRJEB2862	SAMEA1035642	Young BC	2012	22393007	WHM-2012-04-001			nose	colonising	358	15		11	11	11	GCF_001611325.1	0	reads	2779310	275151690	99	98	97.25	127	2683514	184745	32.74
ERR083794	C00001346	PRJEB2862	SAMEA1035621	Young BC	2012	22393007	WHM-2012-04-001			nose	colonising	358	15		13	11	11	GCF_001611325.1	0	reads	3213894	318175506	99	114	97.11	130	2684260	247952	32.74
ERR083795	C00001347	PRJEB2862	SAMEA1035609	Young BC	2012	22393007	WHM-2012-04-001			nose	colonising	358	15		12	11	11	GCF_001611325.1	0	reads	2770716	274300884	99	98	97.23	114	2682573	184740	32.73
ERR083796	C00001348	PRJEB2862	SAMEA1035592	Young BC	2012	22393007	WHM-2012-04-001			nose	colonising	358	15		10	10	10	GCF_001611325.1	0	reads	2459284	243469116	99	87	97.29	141	2684693	179480	32.74
ERR083797	C00001349	PRJEB2862	SAMEA1035570	Young BC	2012	22393007	WHM-2012-04-001			nose	colonising	358	15		12	12	12	GCF_001611325.1	0	reads	3094852	306390348	99	109	97.39	125	2683575	165358	32.73
ERR083798	C00001350	PRJEB2862	SAMEA1035542	Young BC	2012	22393007	WHM-2012-04-001			blood	invasive	450	15		13	11	10	GCF_001611325.1	0	reads	3364336	333069264	99	119	97.34	117	2682457	199994	32.73
ERR083799	C00001351	PRJEB2862	SAMEA1035540	Young BC	2012	22393007	WHM-2012-04-001			blood	invasive	450	15		12	11	10	GCF_001611325.1	0	reads	4469104	442441296	99	158	96.87	147	2684379	112193	32.73
ERR083800	C00001352	PRJEB2862	SAMEA1035505	Young BC	2012	22393007	WHM-2012-04-001			blood	invasive	450	15		12	11	10	GCF_001611325.1	0	reads	2846236	281777364	99	101	97.21	100	2682007	243016	32.72
ERR083801	C00001353	PRJEB2862	SAMEA1035510	Young BC	2012	22393007	WHM-2012-04-001			blood	invasive	450	15		12	11	10	GCF_001611325.1	0	reads	2975352	294559848	99	105	97.06	126	2684035	173019	32.73
ERR083802	C00001354	PRJEB2862	SAMEA1035545	Young BC	2012	22393007	WHM-2012-04-001			blood	invasive	450	15		12	11	10	GCF_001611325.1	0	reads	3642874	360644526	99	129	97.13	139	2684709	179480	32.74
ERR083803	C00001355	PRJEB2862	SAMEA1035558	Young BC	2012	22393007	WHM-2012-04-001			blood	invasive	450	15		12	11	10	GCF_001611325.1	0	reads	3277574	324479826	99	116	97.05	123	2683802	152662	32.74
ERR083804	C00001356	PRJEB2862	SAMEA1035619	Young BC	2012	22393007	WHM-2012-04-001			blood	invasive	450	15		12	11	10	GCF_001611325.1	0	reads	3174858	314310942	99	112	97.19	126	2683981	184740	32.73
ERR083805	C00001357	PRJEB2862	SAMEA1035605	Young BC	2012	22393007	WHM-2012-04-001			blood	invasive	450	15		12	11	10	GCF_001611325.1	0	reads	3468950	343426050	99	123	97.29	137	2684039	148200	32.73
ERR083806	C00001358	PRJEB2862	SAMEA1035662	Young BC	2012	22393007	WHM-2012-04-001		Yes	blood	invasive	450	15		12	11	10	GCF_001611325.1	0	reads	3047008	301653792	99	108	97.29	109	2683063	177813	32.73
ERR083807	C00001359	PRJEB2862	SAMEA1035647	Young BC	2012	22393007	WHM-2012-04-001			blood	invasive	450	15		12	10	10	GCF_001611325.1	0	reads	3178452	314666748	99	112	97.1	141	2684888	184740	32.73
ERR083808	C00001360	PRJEB2862	SAMEA1035531	Young BC	2012	22393007	WHM-2012-04-001			blood	invasive	450	15		11	11	10	GCF_001611325.1	0	reads	3247222	321474978	99	115	96.43	214	2682494	41729	32.74
ERR083719	C00000961	PRJEB2862	SAMEA1035507	Young BC	2012	22393007	WHM-2012-04-002			nose	colonising	60	20		51	46	28	GCF_003194165.1	0	reads	3434946	175182246	51	62	90.66	768	2772861	51278	32.69
ERR083720	C00000962	PRJEB2862	SAMEA1035520	Young BC	2012	22393007	WHM-2012-04-002			nose	colonising	60	20		45	41	26	GCF_003194165.1	0	reads	2687268	137050668	51	49	89.89	744	2769404	60584	32.71
ERR083721	C00000963	PRJEB2862	SAMEA1035586	Young BC	2012	22393007	WHM-2012-04-002			nose	colonising	60	20		20	15	0	GCF_003194165.1	0	reads	3129052	159581652	51	57	90.91	874	2773615	50342	32.73
ERR083722	C00000964	PRJEB2862	SAMEA1035571	Young BC	2012	22393007	WHM-2012-04-002			nose	colonising	60	20		46	41	28	GCF_003194165.1	0	reads	3023774	154212474	51	55	90.76	863	2772160	45881	32.72
ERR083723	C00000965	PRJEB2862	SAMEA1035599	Young BC	2012	22393007	WHM-2012-04-002			nose	colonising	60	20		23	19	0	GCF_003194165.1	0	reads	3027936	154424736	51	55	90.64	752	2773047	53406	32.71
ERR083724	C00000966	PRJEB2862	SAMEA1035617	Young BC	2012	22393007	WHM-2012-04-002			nose	colonising	60	20		13	8	0	GCF_003194165.1	0	reads	2474260	126187260	51	45	90.92	715	2765460	44415	32.72
ERR083725	C00000967	PRJEB2862	SAMEA1035636	Young BC	2012	22393007	WHM-2012-04-002			nose	colonising	60	20		39	35	27	GCF_003194165.1	0	reads	2464520	125690520	51	45	89.28	762	2764452	39841	32.72
ERR083726	C00000968	PRJEB2862	SAMEA1035583	Young BC	2012	22393007	WHM-2012-04-002			nose	colonising	60	20		39	35	24	GCF_003194165.1	0	reads	3056328	155872728	51	55	90.65	842	2771436	50601	32.73
ERR083727	C00000969	PRJEB2862	SAMEA1035569	Young BC	2012	22393007	WHM-2012-04-002			nose	colonising	60	20		11	6	0	GCF_003194165.1	0	reads	2387366	121755666	51	43	91.07	732	2761225	45883	32.72
ERR083728	C00000970	PRJEB2862	SAMEA1035543	Young BC	2012	22393007	WHM-2012-04-002	Yes		nose	colonising	60	20					GCF_003194165.1	0	reads	2719766	138708066	51	49	90.85	780	2772058	46338	32.7
ERR083729	C00000971	PRJEB2862	SAMEA1035519	Young BC	2012	22393007	WHM-2012-04-002			nose	colonising	60	20		46	42	26	GCF_003194165.1	0	reads	3133488	159807888	51	57	90.72	736	2769231	63426	32.71
ERR083730	C00000972	PRJEB2862	SAMEA1035663	Young BC	2012	22393007	WHM-2012-04-002			nose	colonising	60	20		13	8	0	GCF_003194165.1	0	reads	3006576	153335376	51	54	90.84	819	2773575	47692	32.71
ERR083731	C00000973	PRJEB2862	SAMEA1035660	Young BC	2012	22393007	WHM-2012-04-002			nose	colonising	118	20		50	45	30	GCF_003194165.1	0	reads	3164162	161372262	51	57	91.18	986	2780815	60234	32.73
ERR083732	C00000974	PRJEB2862	SAMEA1035645	Young BC	2012	22393007	WHM-2012-04-002			nose	colonising	118	20		41	36	28	GCF_003194165.1	0	reads	2048428	104469828	51	37	90.42	794	2770626	59118	32.71
ERR083733	C00000976	PRJEB2862	SAMEA1035666	Young BC	2012	22393007	WHM-2012-04-002			nose	colonising	118	20		38	34	28	GCF_003194165.1	0	reads	2282990	116432490	51	41	91.17	880	2773189	45637	32.74
ERR083734	C00000977	PRJEB2862	SAMEA1035598	Young BC	2012	22393007	WHM-2012-04-002			nose	colonising	118	20		34	30	26	GCF_003194165.1	0	reads	2089084	106543284	51	38	90.31	820	2749532	26662	32.77
ERR083735	C00000978	PRJEB2862	SAMEA1035624	Young BC	2012	22393007	WHM-2012-04-002			nose	colonising	118	20		49	44	30	GCF_003194165.1	0	reads	3112190	158721690	51	56	91.25	869	2763852	50907	32.73
ERR083736	C00000980	PRJEB2862	SAMEA1035591	Young BC	2012	22393007	WHM-2012-04-002			nose	colonising	118	20		37	32	27	GCF_003194165.1	0	reads	2282622	116413722	51	41	90.94	959	2760132	31338	32.78
ERR083737	C00000981	PRJEB2862	SAMEA1035579	Young BC	2012	22393007	WHM-2012-04-002			nose	colonising	118	20		41	36	30	GCF_003194165.1	0	reads	2476432	126298032	51	45	90.39	935	2749394	29470	32.8
ERR083739	C00000983	PRJEB2862	SAMEA1035529	Young BC	2012	22393007	WHM-2012-04-002			nose	colonising	118	20		35	30	26	GCF_003194165.1	0	reads	1996328	101812728	51	36	91.33	804	2759659	36903	32.74
ERR083740	C00000984	PRJEB2862	SAMEA1035525	Young BC	2012	22393007	WHM-2012-04-002			nose	colonising	118	20		44	39	30	GCF_003194165.1	0	reads	2196214	112006914	51	40	91.27	802	2767795	45407	32.73
ERR083697	C00000755	PRJEB2862	SAMEA1035665	Young BC	2012	22393007	WHM-2012-04-003	Yes		nose	colonising	59	30					GCF_009912675.1	0	reads	4567320	232933320	51	83	91.31	306	2762874	67525	32.71
ERR083698	C00000756	PRJEB2862	SAMEA1035650	Young BC	2012	22393007	WHM-2012-04-003			nose	colonising	59	30		4	3	2	GCF_009912675.1	0	reads	4691546	239268846	51	85	88.41	319	2762954	59010	32.71
ERR083699	C00000757	PRJEB2862	SAMEA1035585	Young BC	2012	22393007	WHM-2012-04-003			nose	colonising	59	30		5	4	3	GCF_009912675.1	0	reads	6309668	321793068	51	115	92.13	245	2759351	67614	32.69
ERR083700	C00000758	PRJEB2862	SAMEA1035603	Young BC	2012	22393007	WHM-2012-04-003			nose	colonising	59	30		2	1	0	GCF_009912675.1	0	reads	6840242	348852342	51	125	91.99	287	2761353	67280	32.7
ERR083701	C00000760	PRJEB2862	SAMEA1035633	Young BC	2012	22393007	WHM-2012-04-003			nose	colonising	59	30		5	4	3	GCF_009912675.1	0	reads	6105292	311369892	51	111	91.77	302	2762311	67562	32.7
ERR083702	C00000761	PRJEB2862	SAMEA1035648	Young BC	2012	22393007	WHM-2012-04-003			nose	colonising	59	30		4	3	2	GCF_009912675.1	0	reads	5565736	283852536	51	101	88.88	343	2764376	65873	32.71
ERR083703	C00000762	PRJEB2862	SAMEA1035671	Young BC	2012	22393007	WHM-2012-04-003			nose	colonising	59	30		5	4	3	GCF_009912675.1	0	reads	5924968	302173368	51	108	91.86	315	2763085	67137	32.71
ERR083704	C00000763	PRJEB2862	SAMEA1035655	Young BC	2012	22393007	WHM-2012-04-003			nose	colonising	59	30		4	3	2	GCF_009912675.1	0	reads	4986850	254329350	51	91	91.55	311	2762069	73581	32.7
ERR083705	C00000764	PRJEB2862	SAMEA1035513	Young BC	2012	22393007	WHM-2012-04-003			nose	colonising	59	30		5	4	3	GCF_009912675.1	0	reads	6841178	348900078	51	125	91.98	288	2761254	73920	32.69
ERR083706	C00000765	PRJEB2862	SAMEA1035528	Young BC	2012	22393007	WHM-2012-04-003			nose	colonising	59	30		5	5	4	GCF_009912675.1	0	reads	5039708	257025108	51	92	71.09	401	2764138	61667	32.71
ERR083707	C00000766	PRJEB2862	SAMEA1035572	Young BC	2012	22393007	WHM-2012-04-003			nose	colonising	59	30		4	4	3	GCF_009912675.1	0	reads	6590674	336124374	51	120	91.83	308	2762292	67137	32.71
ERR083708	C00000949	PRJEB2862	SAMEA1035594	Young BC	2012	22393007	WHM-2012-04-003			nose	colonising	114	30		18	18	17	GCF_009912675.1	0	reads	2281060	116334060	51	41	89.15	435	2759420	51550	32.73
ERR083709	C00000950	PRJEB2862	SAMEA1035668	Young BC	2012	22393007	WHM-2012-04-003			nose	colonising	114	30		8	8	7	GCF_009912675.1	0	reads	3016242	153828342	51	55	87.82	480	2764681	52760	32.73
ERR083710	C00000951	PRJEB2862	SAMEA1035612	Young BC	2012	22393007	WHM-2012-04-003			nose	colonising	114	30		8	8	7	GCF_009912675.1	0	reads	3177554	162055254	51	58	89.92	434	2762592	61628	32.73
ERR083711	C00000952	PRJEB2862	SAMEA1035634	Young BC	2012	22393007	WHM-2012-04-003			nose	colonising	114	30		8	8	7	GCF_009912675.1	0	reads	3314666	169047966	51	60	88.83	507	2764729	54256	32.74
ERR083712	C00000954	PRJEB2862	SAMEA1035554	Young BC	2012	22393007	WHM-2012-04-003			nose	colonising	114	30		9	8	7	GCF_009912675.1	0	reads	3616436	184438236	51	66	89.81	442	2762726	61684	32.73
ERR083713	C00000955	PRJEB2862	SAMEA1035580	Young BC	2012	22393007	WHM-2012-04-003			nose	colonising	114	30		8	8	7	GCF_009912675.1	0	reads	3037768	154926168	51	55	87.32	546	2763822	51550	32.75
ERR083714	C00000956	PRJEB2862	SAMEA1035515	Young BC	2012	22393007	WHM-2012-04-003			nose	colonising	114	30		19	19	18	GCF_009912675.1	0	reads	3471682	177055782	51	63	89.21	458	2764356	61684	32.74
ERR083715	C00000957	PRJEB2862	SAMEA1035517	Young BC	2012	22393007	WHM-2012-04-003			nose	colonising	114	30		8	8	7	GCF_009912675.1	0	reads	2282692	116417292	51	41	89.95	493	2759134	49584	32.73
ERR083717	C00000959	PRJEB2862	SAMEA1035640	Young BC	2012	22393007	WHM-2012-04-003			nose	colonising	114	30		8	8	7	GCF_009912675.1	0	reads	2478214	126388914	51	45	89.43	498	2757963	44528	32.74
ERR083718	C00000960	PRJEB2862	SAMEA1035673	Young BC	2012	22393007	WHM-2012-04-003			nose	colonising	114	30		19	19	18	GCF_009912675.1	0	reads	2728654	139161354	51	49	89.32	554	2766634	53694	32.74
ERR083809	C00002539	PRJEB2862	SAMEA1035596	Young BC	2012	22393007	WHM-2012-04-003			nose	colonising	239	30		23	22	12	GCF_009912675.1	0	reads	11206300	1109423700	99	397	94.94	79	2771748	174868	32.72
ERR083810	C00002540	PRJEB2862	SAMEA1035576	Young BC	2012	22393007	WHM-2012-04-003			nose	colonising	239	30		22	21	12	GCF_009912675.1	0	reads	8694724	860777676	99	308	94.91	85	2772767	170394	32.72
ERR083811	C00002541	PRJEB2862	SAMEA1035559	Young BC	2012	22393007	WHM-2012-04-003			nose	colonising	239	30		21	20	12	GCF_009912675.1	0	reads	9476900	938213100	99	336	94.95	77	2771468	174917	32.72
ERR083812	C00002542	PRJEB2862	SAMEA1035537	Young BC	2012	22393007	WHM-2012-04-003			nose	colonising	239	30		23	22	13	GCF_009912675.1	0	reads	8926382	883711818	99	316	95.01	81	2771813	150808	32.72
ERR083813	C00002543	PRJEB2862	SAMEA1035518	Young BC	2012	22393007	WHM-2012-04-003			nose	colonising	239	30		21	20	11	GCF_009912675.1	0	reads	8083892	800305308	99	286	94.96	89	2772683	155036	32.72
ERR083814	C00002544	PRJEB2862	SAMEA1035593	Young BC	2012	22393007	WHM-2012-04-003			nose	colonising	239	30		21	20	12	GCF_009912675.1	0	reads	9622068	952584732	99	341	94.85	97	2774183	125762	32.73
ERR083815	C00002545	PRJEB2862	SAMEA1035573	Young BC	2012	22393007	WHM-2012-04-003			nose	colonising	239	30		22	21	12	GCF_009912675.1	0	reads	10966356	1085669244	99	389	94.87	79	2771710	174917	32.72
ERR083816	C00002546	PRJEB2862	SAMEA1035553	Young BC	2012	22393007	WHM-2012-04-003			nose	colonising	239	30		24	23	13	GCF_009912675.1	0	reads	9815750	971759250	99	348	94.93	87	2771934	150808	32.72
ERR083817	C00002547	PRJEB2862	SAMEA1035535	Young BC	2012	22393007	WHM-2012-04-003			nose	colonising	239	30		23	22	12	GCF_009912675.1	0	reads	10061556	996094044	99	357	94.98	89	2773286	155036	32.73
ERR083818	C00002548	PRJEB2862	SAMEA1035516	Young BC	2012	22393007	WHM-2012-04-003			nose	colonising	239	30		20	19	11	GCF_009912675.1	0	reads	6618596	655241004	99	234	95.04	87	2772414	150808	32.72
ERR083819	C00002549	PRJEB2862	SAMEA1035616	Young BC	2012	22393007	WHM-2012-04-003			nose	colonising	239	30		23	22	12	GCF_009912675.1	0	reads	8821626	873340974	99	313	94.96	85	2772015	174868	32.72
ERR083820	C00002550	PRJEB2862	SAMEA1035629	Young BC	2012	22393007	WHM-2012-04-003			nose	colonising	309	30		22	21	12	GCF_009912675.1	0	reads	10232986	1013065614	99	363	94.99	77	2771493	174859	32.71
ERR083821	C00002551	PRJEB2862	SAMEA1035625	Young BC	2012	22393007	WHM-2012-04-003			nose	colonising	309	30		21	20	12	GCF_009912675.1	0	reads	8419270	833507730	99	298	94.92	89	2773026	174917	32.72
ERR083822	C00002552	PRJEB2862	SAMEA1035574	Young BC	2012	22393007	WHM-2012-04-003			nose	colonising	309	30		23	22	13	GCF_009912675.1	0	reads	9676746	957997854	99	343	94.89	90	2772885	139370	32.72
ERR083823	C00002553	PRJEB2862	SAMEA1035595	Young BC	2012	22393007	WHM-2012-04-003			nose	colonising	309	30		22	21	12	GCF_009912675.1	0	reads	9204594	911254806	99	326	95	90	2773419	150808	32.73
ERR083824	C00002554	PRJEB2862	SAMEA1035508	Young BC	2012	22393007	WHM-2012-04-003			nose	colonising	309	30		21	20	12	GCF_009912675.1	0	reads	8064898	798424902	99	286	94.9	89	2772963	174859	32.72
ERR083825	C00002555	PRJEB2862	SAMEA1035539	Young BC	2012	22393007	WHM-2012-04-003			nose	colonising	309	30		21	20	12	GCF_009912675.1	0	reads	8329856	824655744	99	295	94.92	87	2772472	174917	32.72
ERR083826	C00002556	PRJEB2862	SAMEA1035646	Young BC	2012	22393007	WHM-2012-04-003			nose	colonising	309	30		22	21	12	GCF_009912675.1	0	reads	11589878	1147397922	99	411	94.91	83	2772109	174859	32.72
ERR083827	C00002557	PRJEB2862	SAMEA1035649	Young BC	2012	22393007	WHM-2012-04-003			nose	colonising	309	30		22	21	12	GCF_009912675.1	0	reads	10384670	1028082330	99	368	95.03	83	2771795	174917	32.72
ERR083828	C00002558	PRJEB2862	SAMEA1035670	Young BC	2012	22393007	WHM-2012-04-003			nose	colonising	309	30		22	21	12	GCF_009912675.1	0	reads	7577196	750142404	99	268	94.9	89	2773207	155036	32.73
ERR083829	C00002559	PRJEB2862	SAMEA1035524	Young BC	2012	22393007	WHM-2012-04-003			nose	colonising	309	30		22	21	12	GCF_009912675.1	0	reads	7687554	761067846	99	272	94.97	78	2771982	174859	32.72
ERR083830	C00002560	PRJEB2862	SAMEA1035541	Young BC	2012	22393007	WHM-2012-04-003			nose	colonising	309	30		21	20	12	GCF_009912675.1	0	reads	10273038	1017030762	99	364	95.02	77	2771292	174859	32.71
ERR083831	C00002561	PRJEB2862	SAMEA1035564	Young BC	2012	22393007	WHM-2012-04-003			nose	colonising	354	30		22	21	13	GCF_009912675.1	0	reads	9044082	895364118	99	321	95	86	2771719	150808	32.71
ERR083832	C00002562	PRJEB2862	SAMEA1035556	Young BC	2012	22393007	WHM-2012-04-003			nose	colonising	354	30		22	21	13	GCF_009912675.1	0	reads	9246434	915396966	99	328	95.02	77	2771972	174859	32.72
ERR083833	C00002564	PRJEB2862	SAMEA1035578	Young BC	2012	22393007	WHM-2012-04-003			nose	colonising	354	30		23	22	13	GCF_009912675.1	0	reads	11823568	1170533232	99	419	94.88	92	2772686	125764	32.72
ERR083834	C00002565	PRJEB2862	SAMEA1035608	Young BC	2012	22393007	WHM-2012-04-003			nose	colonising	354	30		23	22	13	GCF_009912675.1	0	reads	6772394	670467006	99	240	94.88	90	2773363	174859	32.73
ERR083835	C00002566	PRJEB2862	SAMEA1035630	Young BC	2012	22393007	WHM-2012-04-003			nose	colonising	354	30		21	20	13	GCF_009912675.1	0	reads	6653310	658677690	99	236	94.93	85	2772129	139312	32.72
ERR083836	C00002567	PRJEB2862	SAMEA1035653	Young BC	2012	22393007	WHM-2012-04-003			nose	colonising	354	30		22	21	13	GCF_009912675.1	0	reads	5893362	583442838	99	209	95	85	2772611	170461	32.72
ERR083837	C00002568	PRJEB2862	SAMEA1035669	Young BC	2012	22393007	WHM-2012-04-003			nose	colonising	354	30		22	21	12	GCF_009912675.1	0	reads	10798352	1069036848	99	383	94.91	90	2772721	139370	32.72
ERR083838	C00002569	PRJEB2862	SAMEA1035658	Young BC	2012	22393007	WHM-2012-04-003			nose	colonising	354	30		21	20	13	GCF_009912675.1	0	reads	10148258	1004677542	99	360	94.89	87	2773031	150808	32.73
ERR083839	C00002570	PRJEB2862	SAMEA1035632	Young BC	2012	22393007	WHM-2012-04-003			nose	colonising	354	30		23	22	13	GCF_009912675.1	0	reads	7133996	706265604	99	253	94.87	88	2773180	170721	32.73
ERR083840	C00002571	PRJEB2862	SAMEA1035613	Young BC	2012	22393007	WHM-2012-04-003			nose	colonising	354	30		22	21	12	GCF_009912675.1	0	reads	9984502	988465698	99	354	94.87	97	2773367	174917	32.73
ERR083841	C00002572	PRJEB2862	SAMEA1035589	Young BC	2012	22393007	WHM-2012-04-003			nose	colonising	418	30		24	23	14	GCF_009912675.1	0	reads	11697360	1158038640	99	415	94.87	82	2772388	174917	32.72
ERR083842	C00002573	PRJEB2862	SAMEA1035565	Young BC	2012	22393007	WHM-2012-04-003			nose	colonising	418	30		24	23	14	GCF_009912675.1	0	reads	12296246	1217328354	99	436	94.75	93	2773215	139312	32.73
ERR083843	C00002574	PRJEB2862	SAMEA1035557	Young BC	2012	22393007	WHM-2012-04-003			nose	colonising	418	30		24	23	14	GCF_009912675.1	0	reads	9885992	978713208	99	350	94.67	92	2773206	174859	32.72
ERR083844	C00002575	PRJEB2862	SAMEA1035527	Young BC	2012	22393007	WHM-2012-04-003			nose	colonising	418	30		24	23	14	GCF_009912675.1	0	reads	11397846	1128386754	99	404	94.96	86	2771328	174859	32.71
ERR083845	C00002576	PRJEB2862	SAMEA1035511	Young BC	2012	22393007	WHM-2012-04-003			nose	colonising	418	30		23	22	14	GCF_009912675.1	0	reads	7373686	729994914	99	261	94.85	86	2772618	150808	32.72
ERR083846	C00002577	PRJEB2862	SAMEA1035641	Young BC	2012	22393007	WHM-2012-04-003			nose	colonising	418	30		23	22	14	GCF_009912675.1	0	reads	10269098	1016640702	99	364	95	85	2771559	174859	32.71
ERR083847	C00002578	PRJEB2862	SAMEA1035661	Young BC	2012	22393007	WHM-2012-04-003			nose	colonising	418	30		23	22	14	GCF_009912675.1	0	reads	9710684	961357716	99	344	95.04	89	2772963	155036	32.73
ERR083848	C00002579	PRJEB2862	SAMEA1035601	Young BC	2012	22393007	WHM-2012-04-003			nose	colonising	418	30		23	22	14	GCF_009912675.1	0	reads	6733786	666644814	99	239	94.9	87	2773180	174859	32.72
ERR083849	C00002580	PRJEB2862	SAMEA1035549	Young BC	2012	22393007	WHM-2012-04-003			nose	colonising	418	30		25	24	15	GCF_009912675.1	0	reads	10601500	1049548500	99	376	95.05	76	2771537	174859	32.72
ERR083850	C00002581	PRJEB2862	SAMEA1035509	Young BC	2012	22393007	WHM-2012-04-003			nose	colonising	552	30		24	23	15	GCF_009912675.1	0	reads	9977488	987771312	99	354	94.7	91	2772712	174859	32.72
ERR083851	C00002582	PRJEB2862	SAMEA1035577	Young BC	2012	22393007	WHM-2012-04-003			nose	colonising	552	30		24	23	15	GCF_009912675.1	0	reads	10147112	1004564088	99	360	94.52	99	2774993	150808	32.74
ERR083852	C00002583	PRJEB2862	SAMEA1035555	Young BC	2012	22393007	WHM-2012-04-003			nose	colonising	552	30		25	24	15	GCF_009912675.1	0	reads	12233780	1211144220	99	434	94.6	96	2773976	150808	32.73
ERR083853	C00002584	PRJEB2862	SAMEA1035628	Young BC	2012	22393007	WHM-2012-04-003			nose	colonising	552	30		24	23	15	GCF_009912675.1	0	reads	10346434	1024296966	99	367	95.02	80	2772137	182081	32.72
ERR083854	C00002585	PRJEB2862	SAMEA1035623	Young BC	2012	22393007	WHM-2012-04-003			nose	colonising	552	30		24	23	15	GCF_009912675.1	0	reads	11356558	1124299242	99	403	94.52	98	2774700	138310	32.73
ERR083855	C00002586	PRJEB2862	SAMEA1035600	Young BC	2012	22393007	WHM-2012-04-003			nose	colonising	552	30		25	24	15	GCF_009912675.1	0	reads	9548416	945293184	99	338	94.97	81	2772456	174859	32.72
ERR083856	C00002587	PRJEB2862	SAMEA1035657	Young BC	2012	22393007	WHM-2012-04-003			nose	colonising	599	30		25	24	15	GCF_009912675.1	0	reads	10872668	1076394132	99	385	94.91	85	2772169	174859	32.72
ERR083857	C00002588	PRJEB2862	SAMEA1035652	Young BC	2012	22393007	WHM-2012-04-003			nose	colonising	599	30		24	23	15	GCF_009912675.1	0	reads	4723870	467663130	99	167	94.4	88	2773610	167788	32.73
ERR083858	C00002589	PRJEB2862	SAMEA1035550	Young BC	2012	22393007	WHM-2012-04-003			nose	colonising	599	30		24	23	15	GCF_009912675.1	0	reads	9117316	902614284	99	323	94.28	113	2775562	135739	32.74
ERR083859	C00002590	PRJEB2862	SAMEA1035552	Young BC	2012	22393007	WHM-2012-04-003			nose	colonising	599	30		23	22	15	GCF_009912675.1	0	reads	5449556	539506044	99	193	94.87	98	2773295	155036	32.72
ERR083860	C00002591	PRJEB2862	SAMEA1035582	Young BC	2012	22393007	WHM-2012-04-003			nose	colonising	599	30		24	23	15	GCF_009912675.1	0	reads	9394224	930028176	99	333	94.82	100	2774962	155036	32.73
ERR083861	C00002592	PRJEB2862	SAMEA1035566	Young BC	2012	22393007	WHM-2012-04-003			nose	colonising	599	30		25	24	16	GCF_009912675.1	0	reads	8733432	864609768	99	310	94.74	91	2773029	125763	32.73
ERR083862	C00002593	PRJEB2862	SAMEA1035587	Young BC	2012	22393007	WHM-2012-04-003			nose	colonising	599	30		24	23	15	GCF_009912675.1	0	reads	9407528	931345272	99	333	95.11	82	2771723	174859	32.72
ERR083863	C00002594	PRJEB2862	SAMEA1035521	Young BC	2012	22393007	WHM-2012-04-003			nose	colonising	599	30		25	24	15	GCF_009912675.1	0	reads	10188646	1008675954	99	361	95	92	2773303	174859	32.72
ERR083864	C00002595	PRJEB2862	SAMEA1035548	Young BC	2012	22393007	WHM-2012-04-003			nose	colonising	599	30		25	24	15	GCF_009912675.1	0	reads	9180396	908859204	99	325	94.89	101	2774318	150808	32.73
ERR083865	C00002596	PRJEB2862	SAMEA1035536	Young BC	2012	22393007	WHM-2012-04-003			nose	colonising	599	30		24	23	15	GCF_009912675.1	0	reads	12103054	1198202346	99	429	95.13	83	2771459	155036	32.71
ERR1299254	C00000461	PRJEB2881	SAMEA3886483	Golubchik T	2013	23658690	WHM-2013-02-001			nose	colonising	0	22		2	2	1	GCF_014335895.1	0	reads	6858936	349805736	51	125	93.12	615	2736839	72990	32.74
ERR1299255	C00000462	PRJEB2881	SAMEA3886484	Golubchik T	2013	23658690	WHM-2013-02-001			nose	colonising	0	22		0	0	0	GCF_014335895.1	0	reads	3121244	159183444	51	57	93.76	636	2738070	72940	32.75
ERR1299256	C00000463	PRJEB2881	SAMEA3886485	Golubchik T	2013	23658690	WHM-2013-02-001			nose	colonising	0	22		0	0	0	GCF_014335895.1	0	reads	6392672	326026272	51	116	93.42	620	2738181	72940	32.75
ERR1299257	C00000465	PRJEB2881	SAMEA3886486	Golubchik T	2013	23658690	WHM-2013-02-001			nose	colonising	0	22		5	5	4	GCF_014335895.1	0	reads	6913540	352590540	51	126	92.95	648	2739402	74067	32.75
ERR1299258	C00000466	PRJEB2881	SAMEA3886487	Golubchik T	2013	23658690	WHM-2013-02-001			nose	colonising	0	22		3	3	2	GCF_014335895.1	0	reads	7119402	363089502	51	130	92.77	563	2736268	74067	32.74
ERR1299259	C00000467	PRJEB2881	SAMEA3886488	Golubchik T	2013	23658690	WHM-2013-02-001			nose	colonising	0	22		0	0	0	GCF_014335895.1	0	reads	3879140	197836140	51	70	91.27	687	2740009	73382	32.75
ERR1299260	C00000469	PRJEB2881	SAMEA3886489	Golubchik T	2013	23658690	WHM-2013-02-001			nose	colonising	0	22		1	1	0	GCF_014335895.1	0	reads	9598066	489501366	51	175	92.15	638	2738256	73382	32.75
ERR1299261	C00000470	PRJEB2881	SAMEA3886490	Golubchik T	2013	23658690	WHM-2013-02-001			nose	colonising	0	22		2	2	2	GCF_014335895.1	0	reads	2339052	119291652	51	42	92.97	686	2739183	72578	32.75
ERR1299262	C00000471	PRJEB2881	SAMEA3886491	Golubchik T	2013	23658690	WHM-2013-02-001			nose	colonising	0	22		2	2	2	GCF_014335895.1	0	reads	2506912	127852512	51	45	92.95	687	2739489	72549	32.75
ERR1299263	C00000472	PRJEB2881	SAMEA3886492	Golubchik T	2013	23658690	WHM-2013-02-001	Yes		nose	colonising	0	22					GCF_014335895.1	0	reads	3648884	186093084	51	66	93.26	660	2738948	73382	32.74
ERR1299284	C00000450	PRJEB2881	SAMEA3886473	Golubchik T	2013	23658690	WHM-2013-02-002			nose	colonising	0	2257		2	2	2	GCF_014335895.1	0	reads	2528824	128970024	51	46	93.68	625	2709994	72523	32.78
ERR1299285	C00000451	PRJEB2881	SAMEA3886474	Golubchik T	2013	23658690	WHM-2013-02-002			nose	colonising	0	2257		1	1	1	GCF_014335895.1	0	reads	3124686	159358986	51	57	93.25	632	2711147	73381	32.79
ERR1299286	C00000453	PRJEB2881		Golubchik T	2013	23658690	WHM-2013-02-002			nose	colonising	0	2257		6	6	5	GCF_014335895.1	0	reads	3581982	182681082	51	65	92.94	602	2709676	72940	32.77
ERR1299287	C00000454	PRJEB2881	SAMEA3886476	Golubchik T	2013	23658690	WHM-2013-02-002			nose	colonising	0	2257		0	0	0	GCF_014335895.1	0	reads	4473252	228135852	51	81	93.42	575	2708520	73381	32.76
ERR1299288	C00000455	PRJEB2881	SAMEA3886477	Golubchik T	2013	23658690	WHM-2013-02-002			nose	colonising	0	2257		5	5	5	GCF_014335895.1	0	reads	4145540	211422540	51	75	92.62	605	2709881	72906	32.78
ERR1299289	C00000456	PRJEB2881	SAMEA3886478	Golubchik T	2013	23658690	WHM-2013-02-002			nose	colonising	0	2257		2	2	1	GCF_014335895.1	0	reads	4242916	216388716	51	77	92.89	604	2709790	72906	32.77
ERR1299290	C00000457	PRJEB2881		Golubchik T	2013	23658690	WHM-2013-02-002			nose	colonising	0	2257		2	2	1	GCF_014335895.1	0	reads	4776972	243625572	51	87	93.23	614	2710208	73381	32.78
ERR1299291	C00000458	PRJEB2881	SAMEA3886480	Golubchik T	2013	23658690	WHM-2013-02-002			nose	colonising	0	2257		3	3	2	GCF_014335895.1	0	reads	5802992	295952592	51	106	93.49	530	2707177	72906	32.77
ERR1299292	C00000459	PRJEB2881		Golubchik T	2013	23658690	WHM-2013-02-002	Yes		nose	colonising	0	2257					GCF_014335895.1	0	reads	2571350	131138850	51	47	93.58	622	2709720	72494	32.78
ERR1299293	C00000460	PRJEB2881		Golubchik T	2013	23658690	WHM-2013-02-002			nose	colonising	0	2257		6	6	6	GCF_014335895.1	0	reads	3194258	162907158	51	58	93.43	644	2710951	73381	32.78
ERR1299264	C00000731	PRJEB2881	SAMEA3886572	Golubchik T	2013	23658690	WHM-2013-02-003			nose	colonising	0	22		7	7	7	GCF_900635245.1	0	reads	3205158	163463058	51	58	92.12	639	2760770	65949	32.8
ERR1299265	C00000732	PRJEB2881	SAMEA3886573	Golubchik T	2013	23658690	WHM-2013-02-003			nose	colonising	0	22		20	20	20	GCF_900635245.1	0	reads	4696486	239520786	51	85	92.12	679	2762274	62562	32.8
ERR1299266	C00000733	PRJEB2881	SAMEA3886574	Golubchik T	2013	23658690	WHM-2013-02-003			nose	colonising	0	22		5	5	5	GCF_900635245.1	0	reads	4585182	233844282	51	83	92.45	637	2760819	66176	32.8
ERR1299267	C00000734	PRJEB2881	SAMEA3886575	Golubchik T	2013	23658690	WHM-2013-02-003			nose	colonising	0	22		8	8	7	GCF_900635245.1	0	reads	6108544	311535744	51	111	92	671	2762136	65308	32.81
ERR1299268	C00000735	PRJEB2881	SAMEA3886576	Golubchik T	2013	23658690	WHM-2013-02-003			nose	colonising	0	22		8	8	7	GCF_900635245.1	0	reads	5368422	273789522	51	98	92.06	637	2760345	66201	32.8
ERR1299269	C00000737	PRJEB2881	SAMEA3886577	Golubchik T	2013	23658690	WHM-2013-02-003			nose	colonising	0	22		7	7	7	GCF_900635245.1	0	reads	2622766	133761066	51	47	92.45	683	2761580	62379	32.81
ERR1299270	C00000738	PRJEB2881		Golubchik T	2013	23658690	WHM-2013-02-003	Yes		nose	colonising	0	22					GCF_900635245.1	0	reads	3096348	157913748	51	56	92.35	714	2762345	64526	32.81
ERR1299271	C00000739	PRJEB2881	SAMEA3886579	Golubchik T	2013	23658690	WHM-2013-02-003			nose	colonising	0	22		3	3	3	GCF_900635245.1	0	reads	2220982	113270082	51	40	92.46	712	2762584	64751	32.81
ERR1299272	C00000740	PRJEB2881		Golubchik T	2013	23658690	WHM-2013-02-003			nose	colonising	0	22		8	8	7	GCF_900635245.1	0	reads	6579346	335546646	51	120	92.47	651	2761170	64526	32.8
ERR1299273	C00000741	PRJEB2881		Golubchik T	2013	23658690	WHM-2013-02-003			nose	colonising	0	22		8	8	7	GCF_900635245.1	0	reads	4628964	236077164	51	84	92.21	643	2760584	62532	32.8
ERR1299274	C00000742	PRJEB2881	SAMEA3886582	Golubchik T	2013	23658690	WHM-2013-02-003			nose	colonising	0	22		20	20	19	GCF_900635245.1	0	reads	4238002	216138102	51	77	92.38	621	2761253	64526	32.8
ERR1299194	C00000584	PRJEB2881	SAMEA3886493	Golubchik T	2013	23658690	WHM-2013-02-004			nose	colonising	0	22	Yes	3	2	2	GCF_900635905.1	0	reads	5922064	302025264	51	108	89.74	451	2782273	62521	32.74
ERR1299195	C00000585	PRJEB2881	SAMEA3886494	Golubchik T	2013	23658690	WHM-2013-02-004			nose	colonising	0	22	Yes	3	2	1	GCF_900635905.1	0	reads	4850176	247358976	51	88	88.92	591	2786131	54193	32.76
ERR1299196	C00000586	PRJEB2881	SAMEA3886495	Golubchik T	2013	23658690	WHM-2013-02-004			nose	colonising	0	22	Yes	2	1	1	GCF_900635905.1	0	reads	7758816	395699616	51	141	89.37	481	2783434	69167	32.74
ERR1299197	C00000587	PRJEB2881	SAMEA3886496	Golubchik T	2013	23658690	WHM-2013-02-004			nose	colonising	0	22	Yes	2	1	1	GCF_900635905.1	0	reads	5732142	292339242	51	104	89.63	470	2783449	63379	32.74
ERR1299199	C00000589	PRJEB2881	SAMEA3886498	Golubchik T	2013	23658690	WHM-2013-02-004			nose	colonising	0	22	Yes	5	4	3	GCF_900635905.1	0	reads	5759290	293723790	51	105	88.16	512	2785267	63574	32.74
ERR1299200	C00000590	PRJEB2881	SAMEA3886499	Golubchik T	2013	23658690	WHM-2013-02-004	Yes		nose	colonising	0	22	Yes				GCF_900635905.1	0	reads	10047932	512444532	51	183	89.1	522	2785423	54193	32.75
ERR1299202	C00000592	PRJEB2881	SAMEA3886501	Golubchik T	2013	23658690	WHM-2013-02-004			nose	colonising	0	22	Yes	3	2	2	GCF_900635905.1	0	reads	4697044	239549244	51	85	90.06	497	2784197	63377	32.74
ERR1299203	C00000593	PRJEB2881	SAMEA3886502	Golubchik T	2013	23658690	WHM-2013-02-004			nose	colonising	0	22	Yes	3	3	2	GCF_900635905.1	0	reads	4371176	222929976	51	79	89.96	580	2787079	62521	32.75
ERR1299204	C00000594	PRJEB2881	SAMEA3886503	Golubchik T	2013	23658690	WHM-2013-02-004			nose	colonising	0	22	Yes	3	3	2	GCF_900635905.1	0	reads	4026130	205332630	51	73	88.43	597	2787277	55186	32.76
ERR1299205	C00000595	PRJEB2881	SAMEA3886504	Golubchik T	2013	23658690	WHM-2013-02-004			nose	colonising	0	22	Yes	5	4	4	GCF_900635905.1	0	reads	4326212	220636812	51	79	88.12	601	2788380	69934	32.77
ERR1299206	C00000642	PRJEB2881	SAMEA3886546	Golubchik T	2013	23658690	WHM-2013-02-005	Yes		nose	colonising	0	22	Yes				GCF_001018835.2	0	reads	5667630	289049130	51	103	90.44	597	2771363	68063	32.72
ERR1299207	C00000643	PRJEB2881	SAMEA3886547	Golubchik T	2013	23658690	WHM-2013-02-005			nose	colonising	0	22	Yes	2	1	0	GCF_001018835.2	0	reads	6589432	336061032	51	120	86.37	583	2772132	70904	32.72
ERR1299208	C00000644	PRJEB2881	SAMEA3886548	Golubchik T	2013	23658690	WHM-2013-02-005			nose	colonising	0	22	Yes	3	2	0	GCF_001018835.2	0	reads	7483378	381652278	51	136	89.95	584	2771611	68063	32.72
ERR1299210	C00000646	PRJEB2881	SAMEA3886550	Golubchik T	2013	23658690	WHM-2013-02-005			nose	colonising	0	22	Yes	2	1	0	GCF_001018835.2	0	reads	9488814	483929514	51	173	79.18	670	2774806	72998	32.73
ERR1299212	C00000648	PRJEB2881	SAMEA3886552	Golubchik T	2013	23658690	WHM-2013-02-005			nose	colonising	0	22	Yes	2	1	0	GCF_001018835.2	0	reads	12465010	635715510	51	227	86.25	657	2774461	68063	32.73
ERR1299213	C00000649	PRJEB2881	SAMEA3886553	Golubchik T	2013	23658690	WHM-2013-02-005			nose	colonising	0	22	Yes	2	1	0	GCF_001018835.2	0	reads	5905268	301168668	51	107	89.96	591	2771927	68063	32.72
ERR1299275	C00000608	PRJEB2881		Golubchik T	2013	23658690	WHM-2013-02-006			nose	colonising	0	22	Yes	8	7	7	GCF_900635245.1	0	reads	7665610	390946110	51	140	90.28	517	2799306	73380	32.73
ERR1299276	C00000609	PRJEB2881		Golubchik T	2013	23658690	WHM-2013-02-006			nose	colonising	0	22	Yes	11	10	9	GCF_900635245.1	0	reads	3812768	194451168	51	69	89.59	484	2797557	72897	32.72
ERR1299279	C00000612	PRJEB2881		Golubchik T	2013	23658690	WHM-2013-02-006			nose	colonising	0	22	Yes	3	2	2	GCF_900635245.1	0	reads	5437628	277319028	51	99	89.18	493	2796875	69167	32.72
ERR1299281	C00000615	PRJEB2881		Golubchik T	2013	23658690	WHM-2013-02-006	Yes		nose	colonising	0	22	Yes				GCF_900635245.1	0	reads	6463990	329663490	51	118	89.62	591	2800367	70778	32.73
ERR1299283	C00000617	PRJEB2881	SAMEA3886524	Golubchik T	2013	23658690	WHM-2013-02-006			nose	colonising	0	22	Yes	8	8	7	GCF_900635245.1	0	reads	4564602	232794702	51	83	85.98	549	2800407	69167	32.74
ERR1299294	C00000425	PRJEB2881		Golubchik T	2013	23658690	WHM-2013-02-007			nose	colonising	0	22	Yes	1	0	0	GCF_900620235.1	0	reads	2989510	152465010	51	54	92.34	699	2742248	72941	32.8
ERR1299295	C00000426	PRJEB2881		Golubchik T	2013	23658690	WHM-2013-02-007			nose	colonising	0	22	Yes	0	0	0	GCF_900620235.1	0	reads	4086398	208406298	51	74	92.63	648	2740541	72299	32.79
ERR1299296	C00000427	PRJEB2881	SAMEA3886454	Golubchik T	2013	23658690	WHM-2013-02-007			nose	colonising	0	22	Yes	0	0	0	GCF_900620235.1	0	reads	3150330	160666830	51	57	92.29	695	2742003	70904	32.79
ERR1299297	C00000428	PRJEB2881		Golubchik T	2013	23658690	WHM-2013-02-007			nose	colonising	0	22	Yes	0	0	0	GCF_900620235.1	0	reads	1981234	101042934	51	36	92.52	669	2742148	72907	32.79
ERR1299298	C00000429	PRJEB2881	SAMEA3886456	Golubchik T	2013	23658690	WHM-2013-02-007			nose	colonising	0	22	Yes	2	0	0	GCF_900620235.1	0	reads	5583090	284737590	51	102	92.58	638	2740262	72439	32.79
ERR1299299	C00000430	PRJEB2881		Golubchik T	2013	23658690	WHM-2013-02-007			nose	colonising	0	22	Yes	2	0	0	GCF_900620235.1	0	reads	3965410	202235910	51	72	92.68	645	2741873	72439	32.8
ERR1299300	C00000431	PRJEB2881		Golubchik T	2013	23658690	WHM-2013-02-007			nose	colonising	0	22	Yes	1	0	0	GCF_900620235.1	0	reads	12157316	620023116	51	222	92.52	625	2739325	72897	32.78
ERR1299301	C00000433	PRJEB2881		Golubchik T	2013	23658690	WHM-2013-02-007			nose	colonising	0	22	Yes	1	0	0	GCF_900620235.1	0	reads	3316276	169130076	51	60	90.68	680	2783459	72439	32.79
ERR1299302	C00000434	PRJEB2881		Golubchik T	2013	23658690	WHM-2013-02-007	Yes		nose	colonising	0	22	Yes				GCF_900620235.1	0	reads	4081278	208145178	51	74	92.59	632	2739614	72439	32.79
ERR1299303	C00000435	PRJEB2881		Golubchik T	2013	23658690	WHM-2013-02-007			nose	colonising	0	22	Yes	1	0	0	GCF_900620235.1	0	reads	3149936	160646736	51	57	92.6	670	2741502	72907	32.8
ERR1299304	C00000436	PRJEB2881		Golubchik T	2013	23658690	WHM-2013-02-007			nose	colonising	0	22	Yes	0	0	0	GCF_900620235.1	0	reads	4524638	230756538	51	82	92.58	645	2740099	72439	32.79
ERR1299183	C00000596	PRJEB2881	SAMEA3886505	Golubchik T	2013	23658690	WHM-2013-02-008			nose	colonising	0	30		0	0	0	GCF_013467165.1	0	reads	5381520	274457520	51	98	88.46	245	2795443	74283	32.71
ERR1299184	C00000597	PRJEB2881	SAMEA3886506	Golubchik T	2013	23658690	WHM-2013-02-008			nose	colonising	0	30		1	0	0	GCF_013467165.1	0	reads	2772048	141374448	51	50	83.93	332	2795719	55250	32.72
ERR1299185	C00000598	PRJEB2881	SAMEA3886507	Golubchik T	2013	23658690	WHM-2013-02-008			nose	colonising	0	30		1	0	0	GCF_013467165.1	0	reads	7513344	383180544	51	137	73.42	244	2794752	65858	32.72
ERR1299186	C00000599	PRJEB2881	SAMEA3886508	Golubchik T	2013	23658690	WHM-2013-02-008			nose	colonising	0	30		1	0	0	GCF_013467165.1	0	reads	6854970	349603470	51	125	89.16	217	2793006	73903	32.71
ERR1299187	C00000600	PRJEB2881	SAMEA3886509	Golubchik T	2013	23658690	WHM-2013-02-008			nose	colonising	0	30		2	1	0	GCF_013467165.1	0	reads	6608252	337020852	51	120	87.21	227	2794055	74356	32.72
ERR1299188	C00000601	PRJEB2881	SAMEA3886510	Golubchik T	2013	23658690	WHM-2013-02-008			nose	colonising	0	30		3	2	0	GCF_013467165.1	0	reads	6274274	319987974	51	114	89.62	252	2793893	74473	32.71
ERR1299189	C00000602	PRJEB2881	SAMEA3886511	Golubchik T	2013	23658690	WHM-2013-02-008	Yes		nose	colonising	0	30					GCF_013467165.1	0	reads	6921354	352989054	51	126	86.86	214	2793587	67137	32.71
ERR1299190	C00000603	PRJEB2881	SAMEA3886512	Golubchik T	2013	23658690	WHM-2013-02-008			nose	colonising	0	30		2	1	0	GCF_013467165.1	0	reads	5368744	273805944	51	98	87.33	287	2795681	67065	32.72
ERR1299191	C00000604	PRJEB2881	SAMEA3886513	Golubchik T	2013	23658690	WHM-2013-02-008			nose	colonising	0	30		1	0	0	GCF_013467165.1	0	reads	7307354	372675054	51	133	88.5	253	2794429	73580	32.72
ERR1299192	C00000605	PRJEB2881	SAMEA3886514	Golubchik T	2013	23658690	WHM-2013-02-008			nose	colonising	0	30		0	0	0	GCF_013467165.1	0	reads	4594518	234320418	51	84	88.32	253	2794905	74425	32.72
ERR1299193	C00000606	PRJEB2881	SAMEA3886515	Golubchik T	2013	23658690	WHM-2013-02-008			nose	colonising	0	30		1	0	0	GCF_013467165.1	0	reads	5432058	277034958	51	99	87.09	258	2795029	74463	32.72
ERR1299214	C00000652	PRJEB2881	SAMEA3886554	Golubchik T	2013	23658690	WHM-2013-02-009			nose	colonising	0	30		7	4	2	GCF_009912155.1	0	reads	8874248	452586648	51	162	85.98	487	2844651	62993	32.76
ERR1299215	C00000653	PRJEB2881	SAMEA3886555	Golubchik T	2013	23658690	WHM-2013-02-009			nose	colonising	0	30		14	11	8	GCF_009912155.1	0	reads	8022174	409130874	51	146	84.64	500	2845446	54488	32.77
ERR1299217	C00000655	PRJEB2881	SAMEA3886557	Golubchik T	2013	23658690	WHM-2013-02-009			nose	colonising	0	30		8	5	4	GCF_009912155.1	0	reads	7086276	361400076	51	129	85.61	408	2842773	59015	32.75
ERR1299218	C00000656	PRJEB2881	SAMEA3886558	Golubchik T	2013	23658690	WHM-2013-02-009			nose	colonising	0	30		23	21	20	GCF_009912155.1	0	reads	7196122	367002222	51	131	86.84	489	2844624	62993	32.76
ERR1299219	C00000657	PRJEB2881	SAMEA3886559	Golubchik T	2013	23658690	WHM-2013-02-009			nose	colonising	0	30		9	7	7	GCF_009912155.1	0	reads	5881140	299938140	51	107	82.33	478	2845491	54488	32.76
ERR1299220	C00000658	PRJEB2881	SAMEA3886560	Golubchik T	2013	23658690	WHM-2013-02-009	Yes		nose	colonising	0	30					GCF_009912155.1	0	reads	6352020	323953020	51	116	85.89	457	2845071	65858	32.76
ERR1299221	C00000659	PRJEB2881	SAMEA3886561	Golubchik T	2013	23658690	WHM-2013-02-009			nose	colonising	0	30		26	23	22	GCF_009912155.1	0	reads	6872134	350478834	51	125	83.41	518	2846398	54486	32.77
ERR1299222	C00000618	PRJEB2881	SAMEA3886525	Golubchik T	2013	23658690	WHM-2013-02-010			nose	colonising	0	30		15	14	9	GCF_013467165.1	0	reads	12698760	647636760	51	232	87.79	349	2932945	60005	32.74
ERR1299223	C00000619	PRJEB2881	SAMEA3886526	Golubchik T	2013	23658690	WHM-2013-02-010			nose	colonising	0	30		23	22	14	GCF_013467165.1	0	reads	4397980	224296980	51	80	86.01	348	2816133	61432	32.73
ERR1299224	C00000620	PRJEB2881	SAMEA3886527	Golubchik T	2013	23658690	WHM-2013-02-010			nose	colonising	0	30		21	20	13	GCF_013467165.1	0	reads	4068472	207492072	51	74	86.15	390	2817034	67136	32.73
ERR1299225	C00000621	PRJEB2881	SAMEA3886528	Golubchik T	2013	23658690	WHM-2013-02-010			nose	colonising	0	30		5	4	0	GCF_013467165.1	0	reads	5689926	290186226	51	104	87.28	376	2842295	61415	32.74
ERR1299227	C00000623	PRJEB2881	SAMEA3886530	Golubchik T	2013	23658690	WHM-2013-02-010			nose	colonising	0	30		4	3	1	GCF_013467165.1	0	reads	3893324	198559524	51	71	87.45	365	2842692	61684	32.74
ERR1299228	C00000624	PRJEB2881	SAMEA3886531	Golubchik T	2013	23658690	WHM-2013-02-010			nose	colonising	0	30		21	20	12	GCF_013467165.1	0	reads	3096884	157941084	51	56	86.72	383	2815335	58177	32.72
ERR1299229	C00000625	PRJEB2881	SAMEA3886532	Golubchik T	2013	23658690	WHM-2013-02-010			nose	colonising	0	30		5	4	2	GCF_013467165.1	0	reads	3780514	192806214	51	69	88.52	345	2841850	61684	32.74
ERR1299230	C00000626	PRJEB2881	SAMEA3886533	Golubchik T	2013	23658690	WHM-2013-02-010			nose	colonising	0	30		14	13	9	GCF_013467165.1	0	reads	6565800	334855800	51	120	86.92	330	2842135	73884	32.74
ERR1299231	C00000627	PRJEB2881	SAMEA3886534	Golubchik T	2013	23658690	WHM-2013-02-010			nose	colonising	0	30		13	12	9	GCF_013467165.1	0	reads	2931814	149522514	51	53	87.79	424	2842324	58177	32.74
ERR1299232	C00000628	PRJEB2881	SAMEA3886535	Golubchik T	2013	23658690	WHM-2013-02-010	Yes		nose	colonising	0	30					GCF_013467165.1	0	reads	2481094	126535794	51	45	87.58	440	2843402	51549	32.74
ERR1299233	C00000629	PRJEB2881	SAMEA3886536	Golubchik T	2013	23658690	WHM-2013-02-010			nose	colonising	0	30		4	3	1	GCF_013467165.1	0	reads	3300526	168326826	51	60	87.02	393	2842157	61684	32.74
ERR1299234	C00000660	PRJEB2881	SAMEA3886562	Golubchik T	2013	23658690	WHM-2013-02-011			nose	colonising	0	-		2	2	2	GCF_003354625.1	0	reads	2659472	135633072	51	48	83.1	504	2767323	54515	32.77
ERR1299235	C00000661	PRJEB2881	SAMEA3886563	Golubchik T	2013	23658690	WHM-2013-02-011			nose	colonising	0	-		21	21	19	GCF_003354625.1	0	reads	4779588	243758988	51	87	87.91	424	2765484	73581	32.77
ERR1299236	C00000662	PRJEB2881	SAMEA3886564	Golubchik T	2013	23658690	WHM-2013-02-011			nose	colonising	0	-		6	5	2	GCF_003354625.1	0	reads	6474208	330184608	51	118	88.48	339	2763311	69305	32.75
ERR1299237	C00000663	PRJEB2881	SAMEA3886565	Golubchik T	2013	23658690	WHM-2013-02-011			nose	colonising	0	-		28	27	26	GCF_003354625.1	0	reads	4997458	254870358	51	91	84.79	419	2766816	69645	32.77
ERR1299238	C00000664	PRJEB2881	SAMEA3886566	Golubchik T	2013	23658690	WHM-2013-02-011			nose	colonising	0	-		7	6	3	GCF_003354625.1	0	reads	9167466	467540766	51	167	86.53	340	2763237	69646	32.75
ERR1299239	C00000666	PRJEB2881	SAMEA3886567	Golubchik T	2013	23658690	WHM-2013-02-011			nose	colonising	0	-		5	4	2	GCF_003354625.1	0	reads	4599702	234584802	51	84	83.73	417	2766095	69305	32.76
ERR1299240	C00000667	PRJEB2881	SAMEA3886568	Golubchik T	2013	23658690	WHM-2013-02-011	Yes		nose	colonising	0	-					GCF_003354625.1	0	reads	4808096	245212896	51	87	86.01	380	2764746	61627	32.76
ERR1299241	C00000668	PRJEB2881	SAMEA3886569	Golubchik T	2013	23658690	WHM-2013-02-011			nose	colonising	0	-		7	6	2	GCF_003354625.1	0	reads	6185548	315462948	51	113	90.06	285	2761515	73903	32.74
ERR1299242	C00000669	PRJEB2881	SAMEA3886570	Golubchik T	2013	23658690	WHM-2013-02-011			nose	colonising	0	-		3	2	1	GCF_003354625.1	0	reads	4066762	207404862	51	74	89.79	346	2763242	74425	32.75
ERR1299243	C00000670	PRJEB2881	SAMEA3886571	Golubchik T	2013	23658690	WHM-2013-02-011			nose	colonising	0	-		25	24	24	GCF_003354625.1	0	reads	5686554	290014254	51	103	89.95	308	2762200	69654	32.75
ERR1299244	C00000437	PRJEB2881	SAMEA3886463	Golubchik T	2013	23658690	WHM-2013-02-012			nose	colonising	0	30		2	2	1	GCF_009912715.1	0	reads	5028654	256461354	51	91	89.79	441	2849276	67385	32.78
ERR1299245	C00000438	PRJEB2881	SAMEA3886464	Golubchik T	2013	23658690	WHM-2013-02-012			nose	colonising	0	30		6	6	5	GCF_009912715.1	0	reads	6098030	310999530	51	111	89.97	365	2826713	67127	32.76
ERR1299246	C00000439	PRJEB2881	SAMEA3886465	Golubchik T	2013	23658690	WHM-2013-02-012	Yes		nose	colonising	0	30					GCF_009912715.1	0	reads	4266210	217576710	51	78	89.57	473	2829939	70221	32.78
ERR1299247	C00000440	PRJEB2881	SAMEA3886466	Golubchik T	2013	23658690	WHM-2013-02-012			nose	colonising	0	30		5	5	5	GCF_009912715.1	0	reads	5555670	283339170	51	101	89.87	423	2828154	61628	32.77
ERR1299248	C00000441	PRJEB2881	SAMEA3886467	Golubchik T	2013	23658690	WHM-2013-02-012			nose	colonising	0	30		1	1	1	GCF_009912715.1	0	reads	3562302	181677402	51	65	89.98	444	2828817	65858	32.77
ERR1299249	C00000442	PRJEB2881	SAMEA3886468	Golubchik T	2013	23658690	WHM-2013-02-012			nose	colonising	0	30		3	3	1	GCF_009912715.1	0	reads	8275104	422030304	51	151	90.15	391	2826765	64955	32.77
ERR1299250	C00000444	PRJEB2881	SAMEA3886469	Golubchik T	2013	23658690	WHM-2013-02-012			nose	colonising	0	30		2	2	1	GCF_009912715.1	0	reads	7119274	363082974	51	130	90.21	363	2826378	67127	32.76
ERR1299252	C00000447	PRJEB2881	SAMEA3886471	Golubchik T	2013	23658690	WHM-2013-02-012			nose	colonising	0	30		2	2	1	GCF_009912715.1	0	reads	2370884	120915084	51	43	89.95	455	2829012	70221	32.77
ERR1299253	C00000448	PRJEB2881	SAMEA3886472	Golubchik T	2013	23658690	WHM-2013-02-012			nose	colonising	0	30		4	4	2	GCF_009912715.1	0	reads	6726416	343047216	51	123	90.18	697	2983235	43116	32.69
ERR1299305	C00000630	PRJEB2881		Golubchik T	2013	23658690	WHM-2013-02-013			nose	colonising	0	36	Yes	7	5	5	GCF_900478245.1	0	reads	5805726	296092026	51	106	85.92	444	2912453	54487	32.76
ERR1299306	C00000631	PRJEB2881		Golubchik T	2013	23658690	WHM-2013-02-013			nose	colonising	0	36	Yes	7	6	6	GCF_900478245.1	0	reads	3990796	203530596	51	72	85.28	397	2910921	67234	32.75
ERR1299307	C00000632	PRJEB2881		Golubchik T	2013	23658690	WHM-2013-02-013			nose	colonising	0	36	Yes	8	5	5	GCF_900478245.1	0	reads	6183568	315361968	51	113	85.62	373	2909926	70632	32.74
ERR1299308	C00000633	PRJEB2881		Golubchik T	2013	23658690	WHM-2013-02-013			nose	colonising	0	36	Yes	4	2	2	GCF_900478245.1	0	reads	5722900	291867900	51	104	86.28	382	2909665	67136	32.74
ERR1299309	C00000634	PRJEB2881		Golubchik T	2013	23658690	WHM-2013-02-013			nose	colonising	0	36	Yes	9	7	5	GCF_900478245.1	0	reads	6360706	324396006	51	116	85.71	397	2911216	54489	32.75
ERR1299310	C00000635	PRJEB2881		Golubchik T	2013	23658690	WHM-2013-02-013	Yes		nose	colonising	0	36	Yes				GCF_900478245.1	0	reads	6542088	333646488	51	119	85.16	389	2910851	67136	32.75
ERR1299311	C00000636	PRJEB2881		Golubchik T	2013	23658690	WHM-2013-02-013			nose	colonising	0	36	Yes	8	5	5	GCF_900478245.1	0	reads	5882804	300023004	51	107	83	397	2910901	67136	32.75
ERR1299312	C00000638	PRJEB2881		Golubchik T	2013	23658690	WHM-2013-02-013			nose	colonising	0	36	Yes	3	3	3	GCF_900478245.1	0	reads	4062544	207189744	51	74	81.26	482	2913896	67514	32.76
ERR1299313	C00000641	PRJEB2881		Golubchik T	2013	23658690	WHM-2013-02-013			nose	colonising	0	36	Yes	8	7	6	GCF_900478245.1	0	reads	5219698	266204598	51	95	83.61	427	2911521	58186	32.75
SRR1301040	SA120339	PRJNA248678	SAMN02800614	Burd EM	2014	24850355	WHM-2014-01-001	Yes	Yes	blood	invasive	36	5	Yes				GCF_014336995.1	0	reads	15331440	1533144000	100	549	69.08	331	3049828	51227	32.56
SRR1301041	SA120340	PRJNA248678	SAMN02800615	Burd EM	2014	24850355	WHM-2014-01-001			blood	invasive	62	-	Yes	6	3	1	GCF_014336995.1	0	reads	12918214	1291821400	100	463	56.38	11982	4576093	672	32.63
SRR1301042	SA120341	PRJNA248678	SAMN02800616	Burd EM	2014	24850355	WHM-2014-01-001			blood	invasive	72	5	Yes	7	4	1	GCF_014336995.1	0	reads	14609142	1460914200	100	523	51.22	428	3067298	34483	32.58
SRR1561375	VISA-T3	PRJNA259801	SAMN03013099	Rishishwar L	2016	27446992	WHM-2016-01-001			blood	invasive	305	5	Yes	8	8	8	GCF_003073655.1	0	reads	5419050	1354762500	250	485	92.89	50	2821242	430064	32.73
SRR1561373	VSSA-T1	PRJNA259799	SAMN03013097	Rishishwar L	2016	27446992	WHM-2016-01-001	Yes	Yes	blood	invasive	0	5	Yes				GCF_003073655.1	0	reads	10142582	1494782530	147	536	93.04	56	2812775	243972	32.71
SRR1561374	VSSA-T2	PRJNA259800	SAMN03013098	Rishishwar L	2016	27446992	WHM-2016-01-001			blood	invasive	91	5	Yes	1	1	1	GCF_003073655.1	0	reads	9135028	1343767861	147	481	93.34	55	2813536	429931	32.71
GCF_001611425.1	ST20130939	PRJNA298748	SAMN04166389	Trouillet-Assant S	2016	26918656	WHM-2016-03-001			bone	invasive	92	15		66	66	66	GCF_001611405.1	0	assembly						2	2746828	2726196	32.86
GCF_001611405.1	ST20130938	PRJNA298722	SAMN04166246	Trouillet-Assant S	2016	26918656	WHM-2016-03-001	Yes	Yes	bone	invasive	0	15					GCF_001611405.1	0	assembly						2	2746874	2726242	32.86
GCF_001611385.1	ST20130943	PRJNA298761	SAMN04166545	Trouillet-Assant S	2016	26918656	WHM-2016-03-002			bone	invasive	214	25		46	46	46	GCF_001611365.1	0	assembly						2	2767194	2749890	32.79
GCF_001611365.1	ST20130942	PRJNA298756	SAMN04166544	Trouillet-Assant S	2016	26918656	WHM-2016-03-002	Yes	Yes	bone	invasive	0	25					GCF_001611365.1	0	assembly						2	2767127	2749822	32.79
GCF_001611345.1	ST20130941	PRJNA298754	SAMN04166543	Trouillet-Assant S	2016	26918656	WHM-2016-03-003			bone	invasive	151	15		59	59	59	GCF_001611325.1	0	assembly						1	2678878	2678881	32.86
GCF_001611325.1	ST20130940	PRJNA298753	SAMN04166494	Trouillet-Assant S	2016	26918656	WHM-2016-03-003	Yes	Yes	bone	invasive	0	15					GCF_001611325.1	0	assembly						2	2700358	2679642	32.83
SRR5249880	MMMOSAM:f681f5b6-1064-49e2-9bcf-be2f0d6e07b3	PRJNA369475	SAMN06327286	Young BC	2017	29256859	WHM-2017-01-001			skin	invasive	0	-		3	3	3	GCF_900620215.1	0	reads	2770482	418342782	151	150	96.19	27	2779842	714686	32.74
SRR5249920	MMMOSAM:efa97138-c749-4354-8555-4bdd9a71609a	PRJNA369475	SAMN06327326	Young BC	2017	29256859	WHM-2017-01-001			skin	invasive	0	-		3	3	3	GCF_900620215.1	0	reads	3337544	503969144	151	180	96.07	30	2780435	1443681	32.74
SRR5250272	MMMOSAM:a06a03ee-c538-4811-804d-2689c6513556	PRJNA369475	SAMN06327678	Young BC	2017	29256859	WHM-2017-01-001			nose	colonising	0	-		17	17	17	GCF_900620215.1	0	reads	2873206	433854106	151	155	95.98	27	2780022	1443803	32.74
SRR5250326	MMMOSAM:959f0907-7ea3-458c-a874-eab08886cad5	PRJNA369475	SAMN06327732	Young BC	2017	29256859	WHM-2017-01-001	Yes		nose	colonising	0	-					GCF_900620215.1	0	reads	3438458	519207158	151	186	96.03	26	2779869	714648	32.74
SRR5250439	MMMOSAM:782a9592-552f-4891-b523-674a37b570e0	PRJNA369475	SAMN06327845	Young BC	2017	29256859	WHM-2017-01-001			skin	invasive	0	-		3	3	3	GCF_900620215.1	0	reads	2941584	444179184	151	159	96.33	29	2780406	1443681	32.74
SRR5250514	MMMOSAM:68fba4c4-2ef5-4f7b-9274-06d1b9da80fd	PRJNA369475	SAMN06327920	Young BC	2017	29256859	WHM-2017-01-001		Yes	skin	invasive	0	-		3	3	3	GCF_900620215.1	0	reads	2859656	431808056	151	154	96.11	27	2779812	1443624	32.74
SRR5250695	MMMOSAM:432b6759-9305-4739-8224-02a3e54412c3	PRJNA369475	SAMN06328101	Young BC	2017	29256859	WHM-2017-01-001			nose	colonising	0	-		17	17	17	GCF_900620215.1	0	reads	3532058	533340758	151	191	95.97	28	2780160	1443802	32.74
SRR5251345	MMMOSAM:1117768b-a397-4db1-a025-6a65035d59da	PRJNA369475	SAMN06328715	Young BC	2017	29256859	WHM-2017-01-001			skin	invasive	0	-		3	3	3	GCF_900620215.1	0	reads	3148308	475394508	151	170	96.38	28	2779690	714849	32.74
SRR5249955	MMMOSAM:e5c7ab59-dd8a-42b0-8e9c-c16f37269b43	PRJNA369475	SAMN06327361	Young BC	2017	29256859	WHM-2017-01-002			nose	colonising	0	772	Yes	0	0	0	GCF_005705815.1	0	reads	3039838	459015538	151	164	95.41	80	2789336	250817	32.69
SRR5249964	MMMOSAM:e413aed4-4a23-48ed-ae5f-6b82bcf2b7fb	PRJNA369475	SAMN06327370	Young BC	2017	29256859	WHM-2017-01-002		Yes	skin	invasive	1	772	Yes	1	1	1	GCF_005705815.1	0	reads	2905058	438663758	151	157	95.87	84	2789083	250817	32.68
SRR5250178	MMMOSAM:b4b3cc05-2dda-4bcf-b6b6-1c9f74fbf49a	PRJNA369475	SAMN06327584	Young BC	2017	29256859	WHM-2017-01-002	Yes		nose	colonising	0	772	Yes				GCF_005705815.1	0	reads	2866656	432865056	151	155	96.07	78	2788867	250817	32.68
SRR5250255	MMMOSAM:a3fbfb71-e5f2-4f18-9330-59e92afc9125	PRJNA369475	SAMN06327661	Young BC	2017	29256859	WHM-2017-01-002			skin	invasive	1	772	Yes	1	1	1	GCF_005705815.1	0	reads	2847418	429960118	151	154	95.75	85	2789579	178470	32.69
SRR5250323	MMMOSAM:9642d23d-b6c0-4995-9927-d22960510bb2	PRJNA369475	SAMN06327729	Young BC	2017	29256859	WHM-2017-01-002			nose	colonising	0	772	Yes	0	0	0	GCF_005705815.1	0	reads	2780546	419862446	151	150	95.46	84	2789479	250817	32.69
SRR5250335	MMMOSAM:92eef40a-a565-4649-8dff-26155788dc94	PRJNA369475	SAMN06327741	Young BC	2017	29256859	WHM-2017-01-002			skin	invasive	1	772	Yes	1	1	1	GCF_005705815.1	0	reads	2268982	342616282	151	122	95.51	89	2790264	250817	32.69
SRR5250382	MMMOSAM:8510eaa6-e249-4f40-a25f-53ba3d45aa62	PRJNA369475	SAMN06327788	Young BC	2017	29256859	WHM-2017-01-002			nose	colonising	0	772	Yes	0	0	0	GCF_005705815.1	0	reads	2964294	447608394	151	160	96.04	83	2789489	250817	32.69
SRR5250395	MMMOSAM:8256cf74-d0f4-4559-a904-31199e0a35f5	PRJNA369475	SAMN06327801	Young BC	2017	29256859	WHM-2017-01-002			skin	invasive	1	772	Yes	1	1	1	GCF_005705815.1	0	reads	3207202	484287502	151	173	95.83	79	2788937	250817	32.69
SRR5250756	MMMOSAM:3366c179-821c-4be5-b463-cbd72f73f009	PRJNA369475	SAMN06328162	Young BC	2017	29256859	WHM-2017-01-002			skin	invasive	1	772	Yes	1	1	1	GCF_005705815.1	0	reads	3276476	494747876	151	177	95.56	79	2788686	250817	32.69
SRR5250803	MMMOSAM:2ab8000a-d474-4888-8a3e-0d9350586648	PRJNA369475	SAMN06328209	Young BC	2017	29256859	WHM-2017-01-002			nose	colonising	0	772	Yes	0	0	0	GCF_005705815.1	0	reads	2504958	378248658	151	135	96.08	96	2790703	186644	32.69
SRR5249901	MMMOSAM:f2e77868-70be-452a-874e-2cdfeb8d494e	PRJNA369475	SAMN06327307	Young BC	2017	29256859	WHM-2017-01-003			nose	colonising	0	30		2	2	2	GCF_013467165.1	0	reads	3594736	542805136	151	194	92.94	72	2878229	150885	32.77
SRR5250577	MMMOSAM:5c706a21-419a-4daf-a2a3-843f2428d170	PRJNA369475	SAMN06327983	Young BC	2017	29256859	WHM-2017-01-003			nose	colonising	0	30		2	2	1	GCF_013467165.1	0	reads	2763694	417317794	151	149	93.34	62	2877907	167037	32.77
SRR5250704	MMMOSAM:3f458004-a16b-431a-a298-56b7c6c8c84f	PRJNA369475	SAMN06328110	Young BC	2017	29256859	WHM-2017-01-003			nose	colonising	0	30		2	2	2	GCF_013467165.1	0	reads	2796384	422253984	151	151	93.25	67	2878627	167040	32.77
SRR5251295	MMMOSAM:1bfc995f-925c-484f-986e-99c922755a8a	PRJNA369475	SAMN06328665	Young BC	2017	29256859	WHM-2017-01-003			nose	colonising	0	30		2	0	0	GCF_013467165.1	0	reads	3018340	455769340	151	163	93.35	71	2878627	159744	32.77
SRR5251323	MMMOSAM:180fe968-0932-4856-936a-5475c837e83a	PRJNA369475	SAMN06328693	Young BC	2017	29256859	WHM-2017-01-003	Yes		nose	colonising	0	30					GCF_013467165.1	0	reads	2515054	379773154	151	136	93.46	69	2879016	167224	32.77
SRR5249990	MMMOSAM:df986cfb-0cd5-40fe-9c9e-2dd81f0df95b	PRJNA369475	SAMN06327396	Young BC	2017	29256859	WHM-2017-01-004	Yes		nose	colonising	0	30					GCF_003194105.1	0	reads	3229798	487699498	151	174	91.23	86	2877505	170888	32.79
SRR5250112	MMMOSAM:c697b112-8084-4351-8e7c-c4c16f601054	PRJNA369475	SAMN06327518	Young BC	2017	29256859	WHM-2017-01-004			nose	colonising	0	30		0	0	0	GCF_003194105.1	0	reads	2991880	451773880	151	161	91.24	91	2878278	143782	32.79
SRR5250137	MMMOSAM:bea48725-aef7-47cf-8e1c-533ff08696e1	PRJNA369475	SAMN06327543	Young BC	2017	29256859	WHM-2017-01-004			skin	invasive	4	30		5	5	5	GCF_003194105.1	0	reads	2770398	418330098	151	150	91.27	83	2877473	140785	32.79
SRR5250182	MMMOSAM:b3ff4f90-a8b6-4311-87c6-46e94beea1fa	PRJNA369475	SAMN06327588	Young BC	2017	29256859	WHM-2017-01-004		Yes	skin	invasive	4	30		5	5	5	GCF_003194105.1	0	reads	2624158	396247858	151	142	91.71	88	2877994	137529	32.78
SRR5250196	MMMOSAM:b059aec5-4c42-471f-8975-9c19d4bb0b36	PRJNA369475	SAMN06327602	Young BC	2017	29256859	WHM-2017-01-004			nose	colonising	0	30		0	0	0	GCF_003194105.1	0	reads	3043518	459571218	151	164	91.25	78	2876171	170888	32.79
SRR5250456	MMMOSAM:7588aaa0-2b83-4e6c-85d6-66c7938262fc	PRJNA369475	SAMN06327862	Young BC	2017	29256859	WHM-2017-01-004			skin	invasive	4	30		5	5	5	GCF_003194105.1	0	reads	2686908	405723108	151	145	91.2	85	2877435	170888	32.79
SRR5250563	MMMOSAM:5f1e3cd0-5e0f-4faa-a2be-cc236e2cdb98	PRJNA369475	SAMN06327969	Young BC	2017	29256859	WHM-2017-01-004			nose	colonising	0	30		0	0	0	GCF_003194105.1	0	reads	3320684	501423284	151	179	91.11	87	2877988	140785	32.79
SRR5250602	MMMOSAM:573c10a2-a27a-454d-9865-feeafcdb0584	PRJNA369475	SAMN06328008	Young BC	2017	29256859	WHM-2017-01-004			nose	colonising	0	30		0	0	0	GCF_003194105.1	0	reads	2804348	423456548	151	151	90.89	81	2877142	170888	32.79
SRR5250694	MMMOSAM:43326c38-9cdc-4f6a-b294-746a6755062a	PRJNA369475	SAMN06328100	Young BC	2017	29256859	WHM-2017-01-004			skin	invasive	4	30		5	5	5	GCF_003194105.1	0	reads	2479308	374375508	151	134	91.27	85	2876458	170888	32.79
SRR5250727	MMMOSAM:3bc2d0dd-8fe7-43f0-b4d8-7179aaa5a53e	PRJNA369475	SAMN06328133	Young BC	2017	29256859	WHM-2017-01-004			skin	invasive	4	30		5	5	5	GCF_003194105.1	0	reads	2637142	398208442	151	142	91.08	81	2877064	170888	32.79
SRR5249896	MMMOSAM:f40c5d6a-9609-45ab-8ec5-7a58f32f7910	PRJNA369475	SAMN06327302	Young BC	2017	29256859	WHM-2017-01-005			nose	colonising	0	59		1	1	1	GCF_009912335.1	0	reads	2775678	419127378	151	150	97.19	70	2750191	153701	32.72
SRR5249924	MMMOSAM:ef10b564-afde-4260-b2cf-5022a19598fd	PRJNA369475	SAMN06327330	Young BC	2017	29256859	WHM-2017-01-005			blood	invasive	-6	59		2	1	1	GCF_009912335.1	0	reads	3104546	468786446	151	168	97.07	72	2750794	149411	32.72
SRR5250113	MMMOSAM:c64fbf37-3a7b-4442-9b4b-4739b6e28eed	PRJNA369475	SAMN06327519	Young BC	2017	29256859	WHM-2017-01-005			nose	colonising	0	59		1	0	0	GCF_009912335.1	0	reads	2469444	372886044	151	133	97.22	68	2749435	153771	32.72
SRR5250143	MMMOSAM:bdcd575e-945b-48ad-b689-5386a9533550	PRJNA369475	SAMN06327549	Young BC	2017	29256859	WHM-2017-01-005	Yes		nose	colonising	0	59					GCF_009912335.1	0	reads	3123348	471625548	151	169	97.3	67	2749279	149387	32.72
SRR5250225	MMMOSAM:aa2eec1a-9a0e-4f16-a58f-9ae8f6fe4fba	PRJNA369475	SAMN06327631	Young BC	2017	29256859	WHM-2017-01-005			nose	colonising	0	59		1	0	0	GCF_009912335.1	0	reads	2712192	409540992	151	146	97.28	72	2749998	153771	32.72
SRR5250404	MMMOSAM:7f7823a3-939a-4fee-b51a-3ce14fd47c40	PRJNA369475	SAMN06327810	Young BC	2017	29256859	WHM-2017-01-005			blood	invasive	-6	59		2	1	1	GCF_009912335.1	0	reads	3009736	454470136	151	162	97.11	81	2751431	149411	32.72
SRR5250466	MMMOSAM:748751f2-570c-4d67-a2b2-8a7241a6a7d5	PRJNA369475	SAMN06327872	Young BC	2017	29256859	WHM-2017-01-005			blood	invasive	-6	59		2	1	1	GCF_009912335.1	0	reads	2700766	407815666	151	146	97.38	76	2751053	149387	32.73
SRR5251364	MMMOSAM:0e28a74d-5c1c-433c-b1af-2241d082a6be	PRJNA369475	SAMN06328734	Young BC	2017	29256859	WHM-2017-01-005			blood	invasive	-6	59		3	1	1	GCF_009912335.1	0	reads	4192664	633092264	151	227	97.07	71	2749745	135758	32.72
SRR5251384	MMMOSAM:0a098c72-6347-4e4f-84a9-1a92fd45bf2e	PRJNA369475	SAMN06328754	Young BC	2017	29256859	WHM-2017-01-005		Yes	blood	invasive	-6	59		1	1	1	GCF_009912335.1	0	reads	2688632	405983432	151	145	97.23	64	2749147	149387	32.72
SRR5251415	MMMOSAM:00fa595e-852a-4479-bae9-5f86172a61e9	PRJNA369475	SAMN06328785	Young BC	2017	29256859	WHM-2017-01-005			nose	colonising	0	59		1	0	0	GCF_009912335.1	0	reads	2677044	404233644	151	144	97.19	74	2750484	153978	32.72
SRR5249848	MMMOSAM:fd1ec5f3-2b02-41b9-ae74-364ff795d639	PRJNA369475	SAMN06327254	Young BC	2017	29256859	WHM-2017-01-006			nose	colonising	0	15		2	2	2	GCF_001611325.1	0	reads	2797016	422349416	151	151	98.4	54	2676836	299764	32.71
SRR5249852	MMMOSAM:fc7bfb39-fcb0-4b9f-bf09-4e14ce440f63	PRJNA369475	SAMN06327258	Young BC	2017	29256859	WHM-2017-01-006			skin	invasive	0	15		1	1	1	GCF_001611325.1	0	reads	2842250	429179750	151	153	98.62	58	2676373	311336	32.7
SRR5249933	MMMOSAM:ed065440-c5c8-4cab-9d42-83f4476e80f1	PRJNA369475	SAMN06327339	Young BC	2017	29256859	WHM-2017-01-006			skin	invasive	0	15		1	1	1	GCF_001611325.1	0	reads	2559246	386446146	151	138	98.33	61	2677637	311992	32.71
SRR5249978	MMMOSAM:e10c1901-ae17-4f00-bcf2-be1a6154edbf	PRJNA369475	SAMN06327384	Young BC	2017	29256859	WHM-2017-01-006		Yes	skin	invasive	0	15		1	1	1	GCF_001611325.1	0	reads	3535836	533911236	151	191	98.56	64	2676258	249930	32.7
SRR5250098	MMMOSAM:c8f7d8c8-a0fa-467b-b1b4-f9f202c2425a	PRJNA369475	SAMN06327504	Young BC	2017	29256859	WHM-2017-01-006			nose	colonising	0	15		2	2	2	GCF_001611325.1	0	reads	3443516	519970916	151	186	98.64	49	2676080	311339	32.7
SRR5250141	MMMOSAM:bde46f82-d43a-422e-82c1-34c8e6ce7d02	PRJNA369475	SAMN06327547	Young BC	2017	29256859	WHM-2017-01-006	Yes		nose	colonising	0	15					GCF_001611325.1	0	reads	2973600	449013600	151	161	98.67	58	2676515	299764	32.7
SRR5250205	MMMOSAM:aeb3b3a2-a970-43bc-a8af-ffbd440d91bc	PRJNA369475	SAMN06327611	Young BC	2017	29256859	WHM-2017-01-006			skin	invasive	0	15		1	1	1	GCF_001611325.1	0	reads	3267940	493458940	151	176	98.37	58	2676967	251897	32.7
SRR5250276	MMMOSAM:9f45e002-3d48-4d5e-b808-8decfa0e5377	PRJNA369475	SAMN06327682	Young BC	2017	29256859	WHM-2017-01-006			nose	colonising	0	15		2	2	1	GCF_001611325.1	0	reads	3037898	458722598	151	164	98.45	55	2676136	271735	32.7
SRR5250388	MMMOSAM:83feb899-0f3f-4b35-b18c-83a8be91d864	PRJNA369475	SAMN06327794	Young BC	2017	29256859	WHM-2017-01-006			skin	invasive	0	15		1	1	1	GCF_001611325.1	0	reads	3084796	465804196	151	167	98.25	51	2676418	251897	32.7
SRR5250407	MMMOSAM:7f26d285-8572-4ff2-adee-a49c1238789b	PRJNA369475	SAMN06327813	Young BC	2017	29256859	WHM-2017-01-006			nose	colonising	0	15		2	2	1	GCF_001611325.1	0	reads	3418762	516233062	151	185	98.56	58	2676153	311339	32.7
SRR5249864	MMMOSAM:fa7273c0-31ed-46e6-8f07-6d6fe3d1b3c3	PRJNA369475	SAMN06327270	Young BC	2017	29256859	WHM-2017-01-007			skin	invasive	2	7		4	4	4	GCF_009912355.1	0	reads	2950270	445490770	151	159	96.19	41	2785121	706995	32.74
SRR5250006	MMMOSAM:dade62ba-3e3b-4cc2-a48b-6cf8ee5db616	PRJNA369475	SAMN06327412	Young BC	2017	29256859	WHM-2017-01-007			nose	colonising	0	7		0	0	0	GCF_009912355.1	0	reads	2795062	422054362	151	151	96.02	52	2786470	488377	32.75
SRR5250100	MMMOSAM:c8c65af2-a1f5-4cf9-a0ad-06e27e35babc	PRJNA369475	SAMN06327506	Young BC	2017	29256859	WHM-2017-01-007			nose	colonising	0	7		0	0	0	GCF_009912355.1	0	reads	2421314	365618414	151	131	96.18	46	2785928	705280	32.75
SRR5250132	MMMOSAM:c022dd13-9687-4749-9b5d-2ee0254511f2	PRJNA369475	SAMN06327538	Young BC	2017	29256859	WHM-2017-01-007			nose	colonising	0	7		0	0	0	GCF_009912355.1	0	reads	3606026	544509926	151	195	96.23	45	2785517	488377	32.74
SRR5250231	MMMOSAM:a8b8d6dc-826b-45cb-a72d-a363968996ce	PRJNA369475	SAMN06327637	Young BC	2017	29256859	WHM-2017-01-007		Yes	skin	invasive	2	7		4	4	4	GCF_009912355.1	0	reads	3322186	501650086	151	179	95.56	78	2790147	319179	32.76
SRR5250315	MMMOSAM:97a92ca7-b454-4eb7-997f-3f9643ae7bd7	PRJNA369475	SAMN06327721	Young BC	2017	29256859	WHM-2017-01-007			skin	invasive	2	7		4	4	4	GCF_009912355.1	0	reads	2756756	416270156	151	149	95.86	62	2787591	388186	32.75
SRR5250469	MMMOSAM:726fef9f-2b95-4b83-bd74-e97014e68846	PRJNA369475	SAMN06327875	Young BC	2017	29256859	WHM-2017-01-007	Yes		nose	colonising	0	7					GCF_009912355.1	0	reads	3199410	483110910	151	173	96.07	43	2785787	707283	32.75
SRR5250601	MMMOSAM:5773d2dd-37ee-4394-a20d-bdca41f484fd	PRJNA369475	SAMN06328007	Young BC	2017	29256859	WHM-2017-01-007			skin	invasive	2	7		5	5	5	GCF_009912355.1	0	reads	3298650	498096150	151	178	96.5	47	2785914	488377	32.75
SRR5250740	MMMOSAM:38968c91-0401-4a2b-9b38-310f80e9073b	PRJNA369475	SAMN06328146	Young BC	2017	29256859	WHM-2017-01-007			nose	colonising	0	7		2	2	2	GCF_009912355.1	0	reads	2865062	432624362	151	155	96.29	46	2785422	488377	32.74
SRR5251309	MMMOSAM:1a01d925-822a-46d5-a7fd-bff91328b81e	PRJNA369475	SAMN06328679	Young BC	2017	29256859	WHM-2017-01-007			skin	invasive	2	7		4	4	4	GCF_009912355.1	0	reads	2765124	417533724	151	149	95.87	57	2787610	388425	32.75
SRR5249950	MMMOSAM:e669d2d7-fb69-4b31-92cd-08c7cd4e52bb	PRJNA369475	SAMN06327356	Young BC	2017	29256859	WHM-2017-01-008	Yes		nose	colonising	0	106					GCF_009912015.1	0	reads	2588914	390926014	151	140	97.8	28	2725606	635161	32.72
SRR5250199	MMMOSAM:afc6b76b-bfe3-4d90-8896-45195e9f81fa	PRJNA369475	SAMN06327605	Young BC	2017	29256859	WHM-2017-01-008			nose	colonising	0	106		1	1	1	GCF_009912015.1	0	reads	1830480	276402480	151	99	97.83	26	2725325	635230	32.71
SRR5250251	MMMOSAM:a4f9df26-642e-497a-90db-a27d76442814	PRJNA369475	SAMN06327657	Young BC	2017	29256859	WHM-2017-01-008			nose	colonising	0	106		0	0	0	GCF_009912015.1	0	reads	2578482	389350782	151	139	97.71	31	2725903	635206	32.72
SRR5250757	MMMOSAM:333e9ea4-e103-472e-9ea1-3017f4d318e7	PRJNA369475	SAMN06328163	Young BC	2017	29256859	WHM-2017-01-008			nose	colonising	0	106		0	0	0	GCF_009912015.1	0	reads	1898388	286656588	151	102	97.81	33	2726452	635230	32.72
SRR5251349	MMMOSAM:10ad925e-e645-4779-9757-2ab1b84b81af	PRJNA369475	SAMN06328719	Young BC	2017	29256859	WHM-2017-01-008			nose	colonising	0	106		0	0	0	GCF_009912015.1	0	reads	2221884	335504484	151	120	97.82	30	2725958	559491	32.71
SRR5249863	MMMOSAM:fa9e4357-7ef1-410c-b8af-06566b8e3d86	PRJNA369475	SAMN06327269	Young BC	2017	29256859	WHM-2017-01-009			nose	colonising	0	8		13	13	12	GCF_001018735.2	0	reads	2669564	403104164	151	144	96.84	39	2784790	922362	32.66
SRR5249937	MMMOSAM:ec90c589-9f36-4335-bd38-9ef885898134	PRJNA369475	SAMN06327343	Young BC	2017	29256859	WHM-2017-01-009			blood	invasive	0	8		6	6	6	GCF_001018735.2	0	reads	2183500	329708500	151	118	97.25	44	2784289	867506	32.66
SRR5250096	MMMOSAM:c95fbe72-5bcd-4d7a-bb5d-bf6e8cf291a8	PRJNA369475	SAMN06327502	Young BC	2017	29256859	WHM-2017-01-009			nose	colonising	0	8		16	16	15	GCF_001018735.2	0	reads	1940290	292983790	151	105	97.17	26	2783735	982654	32.66
SRR5250120	MMMOSAM:c45615ef-b3de-4f2c-b991-5802fb846897	PRJNA369475	SAMN06327526	Young BC	2017	29256859	WHM-2017-01-009			blood	invasive	0	8		6	6	6	GCF_001018735.2	0	reads	2026516	306003916	151	109	97.24	38	2784444	922362	32.66
SRR5250203	MMMOSAM:aececd66-2ac5-4d97-b620-468945c98348	PRJNA369475	SAMN06327609	Young BC	2017	29256859	WHM-2017-01-009			nose	colonising	0	8		15	15	15	GCF_001018735.2	0	reads	1901178	287077878	151	102	97.21	49	2784989	867524	32.66
SRR5250318	MMMOSAM:974b161f-0aab-4fcf-a387-5fec2d8307ac	PRJNA369475	SAMN06327724	Young BC	2017	29256859	WHM-2017-01-009	Yes		nose	colonising	0	8					GCF_001018735.2	0	reads	1788606	270079506	151	96	97.06	38	2784807	867506	32.66
SRR5250360	MMMOSAM:8c236eb1-a711-43d9-9c70-33fc0d905982	PRJNA369475	SAMN06327766	Young BC	2017	29256859	WHM-2017-01-009			nose	colonising	0	8		12	12	12	GCF_001018735.2	0	reads	2123004	320573604	151	114	97.1	46	2784774	867506	32.66
SRR5250362	MMMOSAM:8b6b9851-916a-47b7-8c5c-8f0eb882e33f	PRJNA369475	SAMN06327768	Young BC	2017	29256859	WHM-2017-01-009		Yes	blood	invasive	0	8		6	6	6	GCF_001018735.2	0	reads	2001426	302215326	151	108	97.17	29	2784029	982495	32.66
SRR5250376	MMMOSAM:86e0e71c-9352-4eaa-9f10-9bfc3053c7ec	PRJNA369475	SAMN06327782	Young BC	2017	29256859	WHM-2017-01-009			blood	invasive	0	8		6	6	6	GCF_001018735.2	0	reads	1722588	260110788	151	93	97.02	44	2784289	867506	32.66
SRR5250728	MMMOSAM:3baa7537-1e5d-4d3d-996e-8e7db4a018a9	PRJNA369475	SAMN06328134	Young BC	2017	29256859	WHM-2017-01-009			blood	invasive	0	8		7	7	6	GCF_001018735.2	0	reads	2902078	438213778	151	157	97.06	34	2784000	922362	32.66
SRR5249928	MMMOSAM:ee288796-328a-4a99-9884-3eba0f41275c	PRJNA369475	SAMN06327334	Young BC	2017	29256859	WHM-2017-01-010			blood	invasive	6	15		39	39	38	GCF_003354865.1	0	reads	2293204	346273804	151	124	97.77	49	2713816	363505	32.72
SRR5249948	MMMOSAM:e7c9c812-e0a0-466f-af08-c3f7f73bd14c	PRJNA369475	SAMN06327354	Young BC	2017	29256859	WHM-2017-01-010			blood	invasive	6	15		35	35	35	GCF_003354865.1	0	reads	1570036	237075436	151	85	97.81	49	2714164	294878	32.72
SRR5250105	MMMOSAM:c791218e-943e-48d1-8ac1-969cccae998b	PRJNA369475	SAMN06327511	Young BC	2017	29256859	WHM-2017-01-010		Yes	blood	invasive	6	15		39	39	38	GCF_003354865.1	0	reads	2367408	357478608	151	128	97.73	58	2714779	294878	32.72
SRR5250106	MMMOSAM:c7827d92-7fc1-4599-a488-af59946d0ee5	PRJNA369475	SAMN06327512	Young BC	2017	29256859	WHM-2017-01-010			skin	invasive	6	15		38	38	38	GCF_003354865.1	0	reads	2160202	326190502	151	116	97.87	50	2713927	363505	32.72
SRR5250188	MMMOSAM:b2e30b7e-2636-454f-9227-432cb6ee91b9	PRJNA369475	SAMN06327594	Young BC	2017	29256859	WHM-2017-01-010			skin	invasive	6	15		39	39	38	GCF_003354865.1	0	reads	1758174	265484274	151	95	97.94	58	2715093	294878	32.72
SRR5250219	MMMOSAM:ab693ca5-95d8-49c5-8239-9bd6627089bf	PRJNA369475	SAMN06327625	Young BC	2017	29256859	WHM-2017-01-010			nose	colonising	0	15		33	33	33	GCF_003354865.1	0	reads	3310816	499933216	151	179	97.71	54	2719404	242797	32.72
SRR5250245	MMMOSAM:a59ec8ad-1c88-4b31-aade-e69fba29082a	PRJNA369475	SAMN06327651	Young BC	2017	29256859	WHM-2017-01-010			nose	colonising	0	15		34	34	33	GCF_003354865.1	0	reads	2205064	332964664	151	119	97.77	50	2718775	294878	32.72
SRR5250322	MMMOSAM:9664d468-d202-48a8-82be-5847e6d1883d	PRJNA369475	SAMN06327728	Young BC	2017	29256859	WHM-2017-01-010			blood	invasive	6	15		38	38	38	GCF_003354865.1	0	reads	2430496	367004896	151	131	97.87	57	2714692	309788	32.72
SRR5250639	MMMOSAM:506add98-0900-4daf-a3b8-9dcacf31fa9f	PRJNA369475	SAMN06328045	Young BC	2017	29256859	WHM-2017-01-010			skin	invasive	6	15		40	40	39	GCF_003354865.1	0	reads	4609834	696084934	151	249	96.86	50	2714537	294878	32.72
SRR5250647	MMMOSAM:4e998240-cb66-4ba3-9382-af6963d81c2c	PRJNA369475	SAMN06328053	Young BC	2017	29256859	WHM-2017-01-010			nose	colonising	0	15		23	23	23	GCF_003354865.1	0	reads	2761426	416975326	151	149	97.87	54	2719277	363733	32.72
SRR5250690	MMMOSAM:43db422a-7ec8-4a05-9bf3-dda90c9ef95d	PRJNA369475	SAMN06328096	Young BC	2017	29256859	WHM-2017-01-010			skin	invasive	6	15		35	35	34	GCF_003354865.1	0	reads	2037046	307593946	151	110	97.78	60	2715198	309788	32.72
SRR5251272	MMMOSAM:1fa82a5c-992c-4bfe-b570-8fd8b79cd88c	PRJNA369475	SAMN06328642	Young BC	2017	29256859	WHM-2017-01-010			skin	invasive	6	15		40	40	39	GCF_003354865.1	0	reads	1914378	289071078	151	103	97.87	50	2713756	294878	32.71
SRR5251318	MMMOSAM:18cc132a-14f2-41a0-ad9e-db24d932b336	PRJNA369475	SAMN06328688	Young BC	2017	29256859	WHM-2017-01-010			nose	colonising	0	15		1	1	1	GCF_003354865.1	0	reads	3095086	467357986	151	167	97.71	52	2719250	294896	32.72
SRR5251375	MMMOSAM:0c25cfec-7867-4284-8fbb-09539a97f497	PRJNA369475	SAMN06328745	Young BC	2017	29256859	WHM-2017-01-010	Yes		nose	colonising	0	15					GCF_003354865.1	0	reads	1621790	244890290	151	87	98.04	49	2718929	436175	32.72
SRR5251399	MMMOSAM:04373ac6-f5f4-4d23-b2cc-45752d21bddb	PRJNA369475	SAMN06328769	Young BC	2017	29256859	WHM-2017-01-010			blood	invasive	6	15		38	38	38	GCF_003354865.1	0	reads	2190792	330809592	151	118	97.75	57	2714442	252093	32.72
SRR5250190	MMMOSAM:b1bfdc2a-52be-440a-8bea-262e14fc52a6	PRJNA369475	SAMN06327596	Young BC	2017	29256859	WHM-2017-01-011			nose	colonising	0	45		0	0	0	GCF_009912635.1	0	reads	2274896	343509296	151	123	96.8	36	2743779	601451	32.84
SRR5250536	MMMOSAM:64b45ecf-2766-4873-ae90-fff6d3dc38ca	PRJNA369475	SAMN06327942	Young BC	2017	29256859	WHM-2017-01-011			nose	colonising	0	45		0	0	0	GCF_009912635.1	0	reads	2189330	330588830	151	118	96.86	32	2743208	467750	32.84
SRR5250578	MMMOSAM:5c683d73-1e17-4139-a022-0abb3ce811f1	PRJNA369475	SAMN06327984	Young BC	2017	29256859	WHM-2017-01-011			nose	colonising	0	45		0	0	0	GCF_009912635.1	0	reads	2494322	376642622	151	135	96.77	30	2742832	601451	32.83
SRR5251262	MMMOSAM:21a17d4d-5bb0-482d-9c9d-d3d92e4eb7cc	PRJNA369475	SAMN06328632	Young BC	2017	29256859	WHM-2017-01-011			nose	colonising	0	45		0	0	0	GCF_009912635.1	0	reads	1824930	275564430	151	98	96.72	36	2743716	601271	32.84
SRR5251281	MMMOSAM:1e62ecc7-2f86-49de-8282-4ca41cb9b948	PRJNA369475	SAMN06328651	Young BC	2017	29256859	WHM-2017-01-011	Yes		nose	colonising	0	45					GCF_009912635.1	0	reads	2186356	330139756	151	118	96.97	37	2743582	467750	32.84
SRR5249897	MMMOSAM:f403d4f3-e740-40cb-9f80-0b1230964139	PRJNA369475	SAMN06327303	Young BC	2017	29256859	WHM-2017-01-012			nose	colonising	0	398		1	0	0	GCF_002089035.2	0	reads	2750478	415322178	151	148	97.74	55	2684538	407202	32.84
SRR5250003	MMMOSAM:dbd4d97b-1750-4f19-b5bd-6b6212510eea	PRJNA369475	SAMN06327409	Young BC	2017	29256859	WHM-2017-01-012			nose	colonising	0	398		1	0	0	GCF_002089035.2	0	reads	2596652	392094452	151	140	97.66	55	2684582	407202	32.84
SRR5250455	MMMOSAM:75be17c5-9a00-4740-9d87-af5b623f6f2e	PRJNA369475	SAMN06327861	Young BC	2017	29256859	WHM-2017-01-012			nose	colonising	0	398		0	0	0	GCF_002089035.2	0	reads	2105310	317901810	151	113	97.8	58	2684766	407202	32.84
SRR5250638	MMMOSAM:507c1e60-1834-42bd-be84-043f63cbb4b2	PRJNA369475	SAMN06328044	Young BC	2017	29256859	WHM-2017-01-012	Yes		nose	colonising	0	398					GCF_002089035.2	0	reads	1795392	271104192	151	97	97.83	57	2684766	408741	32.84
SRR5251314	MMMOSAM:19585e53-c18f-4e40-86a3-5efae1a19d18	PRJNA369475	SAMN06328684	Young BC	2017	29256859	WHM-2017-01-012			nose	colonising	0	398		1	0	0	GCF_002089035.2	0	reads	2551288	385244488	151	138	97.58	59	2684318	407202	32.84
SRR5249965	MMMOSAM:e3f1fb0e-0f2f-4add-ad7f-09ce7520382a	PRJNA369475	SAMN06327371	Young BC	2017	29256859	WHM-2017-01-013			nose	colonising	0	8		0	0	0	GCF_001019415.2	0	reads	2761182	416938482	151	149	97	36	2777472	720706	32.62
SRR5250040	MMMOSAM:d3b205fe-1cc4-4a88-aaa0-21cf7e30b155	PRJNA369475	SAMN06327446	Young BC	2017	29256859	WHM-2017-01-013			nose	colonising	0	8		0	0	0	GCF_001019415.2	0	reads	2390622	360983922	151	129	96.9	38	2778069	722470	32.62
SRR5250208	MMMOSAM:ad85654a-bc60-4a89-a1bc-7ec4d973978b	PRJNA369475	SAMN06327614	Young BC	2017	29256859	WHM-2017-01-013		Yes	blood	invasive	-27	8		1	1	1	GCF_001019415.2	0	reads	1999916	301987316	151	108	97	35	2778087	721718	32.62
SRR5250280	MMMOSAM:9ec9047c-250f-46cb-9eeb-d2c60484f647	PRJNA369475	SAMN06327686	Young BC	2017	29256859	WHM-2017-01-013			nose	colonising	0	8		1	0	0	GCF_001019415.2	0	reads	1932144	291753744	151	104	96.74	32	2777574	721718	32.62
SRR5250314	MMMOSAM:97e9529d-2f75-492d-844d-90cc4e7def5d	PRJNA369475	SAMN06327720	Young BC	2017	29256859	WHM-2017-01-013			blood	invasive	-27	8		1	1	1	GCF_001019415.2	0	reads	3550668	536150868	151	192	96.87	27	2777417	722470	32.62
SRR5250384	MMMOSAM:84e9493c-f97e-442a-b4ce-a2c26cf1b3fa	PRJNA369475	SAMN06327790	Young BC	2017	29256859	WHM-2017-01-013			nose	colonising	0	8		0	0	0	GCF_001019415.2	0	reads	1676050	253083550	151	90	96.72	48	2778609	722086	32.62
SRR5250427	MMMOSAM:7a01b780-902d-4e89-afd0-971a113a2006	PRJNA369475	SAMN06327833	Young BC	2017	29256859	WHM-2017-01-013			blood	invasive	-27	8		2	1	1	GCF_001019415.2	0	reads	2099384	317006984	151	113	96.8	33	2777746	721718	32.62
SRR5250429	MMMOSAM:79f2c0f8-2ef9-4a71-82aa-b5351b47fff3	PRJNA369475	SAMN06327835	Young BC	2017	29256859	WHM-2017-01-013			blood	invasive	-27	8		1	1	1	GCF_001019415.2	0	reads	2846428	429810628	151	154	96.98	37	2777818	722086	32.62
SRR5250589	MMMOSAM:5a156ca3-9f79-41b6-9f15-8eea4056a00a	PRJNA369475	SAMN06327995	Young BC	2017	29256859	WHM-2017-01-013	Yes		nose	colonising	0	8					GCF_001019415.2	0	reads	1780372	268836172	151	96	96.88	36	2777655	721090	32.62
SRR5250628	MMMOSAM:5362796e-5afa-4dd0-8c18-afad2c15de48	PRJNA369475	SAMN06328034	Young BC	2017	29256859	WHM-2017-01-013			blood	invasive	-27	8		1	1	1	GCF_001019415.2	0	reads	2547100	384612100	151	137	96.68	37	2777723	722470	32.62
SRR5249868	MMMOSAM:f9102fb3-ec08-4705-aae1-1d1d1a9a51d3	PRJNA369475	SAMN06327274	Young BC	2017	29256859	WHM-2017-01-014	Yes		nose	colonising	0	927	Yes				GCF_900620235.1	0	reads	3202418	483565118	151	173	93.02	72	2799021	167758	32.72
SRR5249958	MMMOSAM:e4ee9620-90c8-4840-9acf-744966863122	PRJNA369475	SAMN06327364	Young BC	2017	29256859	WHM-2017-01-014		Yes	skin	invasive	4	927	Yes	12	11	11	GCF_900620235.1	0	reads	3824574	577510674	151	207	93.79	71	2799519	174012	32.72
SRR5249961	MMMOSAM:e4ae5382-53be-4933-a1d6-1106ce4282c2	PRJNA369475	SAMN06327367	Young BC	2017	29256859	WHM-2017-01-014			skin	invasive	4	927	Yes	13	12	12	GCF_900620235.1	0	reads	3516830	531041330	151	190	93.31	72	2799547	156420	32.72
SRR5249975	MMMOSAM:e2241f11-309f-4e32-8cb4-a8f23026e924	PRJNA369475	SAMN06327381	Young BC	2017	29256859	WHM-2017-01-014			skin	invasive	4	927	Yes	12	11	11	GCF_900620235.1	0	reads	3324562	502008862	151	180	93.62	85	2800376	146382	32.73
SRR5250005	MMMOSAM:db75df1d-737a-4643-ab6d-c5b877ee096b	PRJNA369475	SAMN06327411	Young BC	2017	29256859	WHM-2017-01-014			nose	colonising	0	927	Yes	3	2	2	GCF_900620235.1	0	reads	2779240	419665240	151	150	93.5	85	2800215	146382	32.72
SRR5250492	MMMOSAM:6dd1b5d3-de87-41ef-b09b-47f2b28699f5	PRJNA369475	SAMN06327898	Young BC	2017	29256859	WHM-2017-01-014			nose	colonising	0	927	Yes	5	4	4	GCF_900620235.1	0	reads	2821866	426101766	151	152	93.96	88	2799421	167758	32.73
SRR5250764	MMMOSAM:319a8493-60e9-4d10-a9a9-980f8563eabf	PRJNA369475	SAMN06328170	Young BC	2017	29256859	WHM-2017-01-014			skin	invasive	4	927	Yes	12	11	11	GCF_900620235.1	0	reads	2482372	374838172	151	134	93.83	75	2799928	146924	32.72
SRR5249908	MMMOSAM:f1c15882-557c-413c-aeb9-1af1214d74e9	PRJNA369475	SAMN06327314	Young BC	2017	29256859	WHM-2017-01-015			nose	colonising	0	34		0	0	0	GCF_009912475.1	0	reads	3065804	462936404	151	166	95.25	60	2810333	174997	32.73
SRR5250067	MMMOSAM:cf7ad7d8-19dc-416c-a922-3932bacf8077	PRJNA369475	SAMN06327473	Young BC	2017	29256859	WHM-2017-01-015		Yes	skin	invasive	-2	34		0	0	0	GCF_009912475.1	0	reads	2987140	451058140	151	161	95.24	65	2815502	174997	32.73
SRR5250074	MMMOSAM:ceb6f0d6-8a75-4828-afc7-1e19dca9be9b	PRJNA369475	SAMN06327480	Young BC	2017	29256859	WHM-2017-01-015			nose	colonising	0	34		0	0	0	GCF_009912475.1	0	reads	2455494	370779594	151	132	95.42	59	2810646	174997	32.74
SRR5250230	MMMOSAM:a8ecac21-ae5c-4702-82e8-d5e03e7dc482	PRJNA369475	SAMN06327636	Young BC	2017	29256859	WHM-2017-01-015			skin	invasive	-2	34		1	1	0	GCF_009912475.1	0	reads	3126284	472068884	151	169	95.15	62	2810737	174993	32.74
SRR5250258	MMMOSAM:a34cbb8e-fd51-48fd-ba40-df4fe208dbe0	PRJNA369475	SAMN06327664	Young BC	2017	29256859	WHM-2017-01-015			skin	invasive	-2	34		0	0	0	GCF_009912475.1	0	reads	1996690	301500190	151	108	95.46	61	2810407	150398	32.74
SRR5250300	MMMOSAM:9b1905ab-0b6a-456d-9c29-82871c7608e3	PRJNA369475	SAMN06327706	Young BC	2017	29256859	WHM-2017-01-015	Yes		nose	colonising	0	34					GCF_009912475.1	0	reads	2715480	410037480	151	147	95.25	61	2810394	174997	32.73
SRR5250369	MMMOSAM:88902581-9c83-4dd4-a297-ff2bdcd47c28	PRJNA369475	SAMN06327775	Young BC	2017	29256859	WHM-2017-01-015			nose	colonising	0	34		1	1	1	GCF_009912475.1	0	reads	2404062	363013362	151	130	95.42	58	2810061	174997	32.74
SRR5251256	MMMOSAM:22558f0c-e4e3-4ff4-be47-9d87079819e7	PRJNA369475	SAMN06328626	Young BC	2017	29256859	WHM-2017-01-015			nose	colonising	0	34		1	1	1	GCF_009912475.1	0	reads	2833494	427857594	151	153	95.27	60	2810483	174997	32.74
SRR5251391	MMMOSAM:06341bb2-57df-4f04-875b-822978dd37f8	PRJNA369475	SAMN06328761	Young BC	2017	29256859	WHM-2017-01-015			skin	invasive	-2	34		1	1	0	GCF_009912475.1	0	reads	3429620	517872620	151	185	95.1	64	2810638	174993	32.74
SRR5250073	MMMOSAM:ceb9c38c-6aa8-4958-bd76-74f95fa6a80e	PRJNA369475	SAMN06327479	Young BC	2017	29256859	WHM-2017-01-016			nose	colonising	0	30		1	1	1	GCF_013467165.1	0	reads	3224048	486831248	151	174	93.67	108	2867552	150459	32.77
SRR5250286	MMMOSAM:9da9f1d9-eff5-47fd-825c-f9dfae3c4dc2	PRJNA369475	SAMN06327692	Young BC	2017	29256859	WHM-2017-01-016	Yes		nose	colonising	0	30					GCF_013467165.1	0	reads	2974506	449150406	151	161	93.79	109	2867494	150459	32.77
SRR5250308	MMMOSAM:9990ddb7-8e57-4834-a7b6-bc0204615320	PRJNA369475	SAMN06327714	Young BC	2017	29256859	WHM-2017-01-016			nose	colonising	0	30		1	1	1	GCF_013467165.1	0	reads	4289708	647745908	151	232	93.52	108	2867473	150459	32.77
SRR5250702	MMMOSAM:3fe981ba-f8bc-4a3f-9224-4304af59b2e2	PRJNA369475	SAMN06328108	Young BC	2017	29256859	WHM-2017-01-016			nose	colonising	0	30		1	1	1	GCF_013467165.1	0	reads	2727286	411820186	151	147	93.54	105	2866942	150459	32.77
SRR5251253	MMMOSAM:22bac885-b524-439a-9be1-3abf2d5e5ca4	PRJNA369475	SAMN06328623	Young BC	2017	29256859	WHM-2017-01-016			nose	colonising	0	30		1	1	1	GCF_013467165.1	0	reads	2770458	418339158	151	150	93.57	108	2867063	150459	32.76
SRR5249925	MMMOSAM:eeeafdcb-1c2c-4fcc-b0d0-fc2615f589de	PRJNA369475	SAMN06327331	Young BC	2017	29256859	WHM-2017-01-017			skin	invasive	0	1413		22	22	22	GCF_001444345.1	0	reads	2550012	385051812	151	138	97.27	65	2766119	167497	32.71
SRR5250009	MMMOSAM:da97f003-7288-4dae-ba13-25b77c8a9ea0	PRJNA369475	SAMN06327415	Young BC	2017	29256859	WHM-2017-01-017			nose	colonising	0	1413		0	0	0	GCF_001444345.1	0	reads	2573162	388547462	151	139	97.49	50	2764108	167497	32.71
SRR5250131	MMMOSAM:c08a8826-1538-4c0c-866c-9abe71a8a324	PRJNA369475	SAMN06327537	Young BC	2017	29256859	WHM-2017-01-017		Yes	skin	invasive	0	1413		22	22	22	GCF_001444345.1	0	reads	2834580	428021580	151	153	97.33	55	2764684	167497	32.71
SRR5250148	MMMOSAM:bd517e04-d7f4-4ebf-b0a3-12d23e163697	PRJNA369475	SAMN06327554	Young BC	2017	29256859	WHM-2017-01-017			skin	invasive	0	1413		23	23	23	GCF_001444345.1	0	reads	3715920	561103920	151	201	97.22	59	2765523	149035	32.71
SRR5250330	MMMOSAM:943a504c-5145-416c-87b9-9e1088ebfc0b	PRJNA369475	SAMN06327736	Young BC	2017	29256859	WHM-2017-01-017			skin	invasive	0	1413		21	21	21	GCF_001444345.1	0	reads	2746380	414703380	151	148	97.26	62	2765822	167497	32.72
SRR5250340	MMMOSAM:91a43964-c7fd-43fd-b5cb-98599eef878b	PRJNA369475	SAMN06327746	Young BC	2017	29256859	WHM-2017-01-017			nose	colonising	0	1413		0	0	0	GCF_001444345.1	0	reads	2948980	445295980	151	159	97.12	68	2766504	167497	32.71
SRR5250430	MMMOSAM:79758962-6ae0-432e-8b22-daa5df44bd30	PRJNA369475	SAMN06327836	Young BC	2017	29256859	WHM-2017-01-017			skin	invasive	0	1413		23	23	23	GCF_001444345.1	0	reads	3622856	547051256	151	196	97.26	60	2765371	149035	32.71
SRR5250716	MMMOSAM:3dd092d2-9c96-4ce3-b624-ab7e86f5faf4	PRJNA369475	SAMN06328122	Young BC	2017	29256859	WHM-2017-01-017	Yes		nose	colonising	0	1413					GCF_001444345.1	0	reads	2834720	428042720	151	153	97.55	57	2765296	167497	32.71
SRR5250822	MMMOSAM:252cdc30-850e-4f95-9b8d-ce70dbb892d8	PRJNA369475	SAMN06328228	Young BC	2017	29256859	WHM-2017-01-017			nose	colonising	0	1413		0	0	0	GCF_001444345.1	0	reads	3150740	475761740	151	170	97.32	67	2766398	167497	32.72
SRR5251301	MMMOSAM:1b1934b9-368e-457f-9e68-f4d36bbedd3b	PRJNA369475	SAMN06328671	Young BC	2017	29256859	WHM-2017-01-017			nose	colonising	0	1413		0	0	0	GCF_001444345.1	0	reads	2645650	399493150	151	143	97.24	67	2766539	166426	32.72
SRR5249922	MMMOSAM:ef83acc5-0c90-4b81-8cf4-f5ef064b1ec7	PRJNA369475	SAMN06327328	Young BC	2017	29256859	WHM-2017-01-018			nose	colonising	0	45		4	4	4	GCF_009912635.1	0	reads	2988104	451203704	151	161	97.36	31	2692768	468399	32.8
SRR5250244	MMMOSAM:a5e25fbb-81dd-4785-b4be-cbd6fb926a23	PRJNA369475	SAMN06327650	Young BC	2017	29256859	WHM-2017-01-018			skin	invasive	0	45		4	4	4	GCF_009912635.1	0	reads	2465368	372270568	151	133	97.61	32	2693202	468455	32.81
SRR5250304	MMMOSAM:9a881a41-d364-4d65-8e60-aec631a4124a	PRJNA369475	SAMN06327710	Young BC	2017	29256859	WHM-2017-01-018		Yes	skin	invasive	0	45		4	4	4	GCF_009912635.1	0	reads	2383992	359982792	151	129	97.67	31	2692827	468455	32.8
SRR5250356	MMMOSAM:8cbd03d9-0de9-4ccb-8a2c-f4a5748d9c8d	PRJNA369475	SAMN06327762	Young BC	2017	29256859	WHM-2017-01-018			nose	colonising	0	45		0	0	0	GCF_009912635.1	0	reads	2681904	404967504	151	145	97.43	34	2693169	468455	32.81
SRR5250484	MMMOSAM:706febf1-0330-4905-a1f6-4dc4272ca9de	PRJNA369475	SAMN06327890	Young BC	2017	29256859	WHM-2017-01-018			nose	colonising	0	45		0	0	0	GCF_009912635.1	0	reads	2811644	424558244	151	152	97.45	35	2693550	468455	32.81
SRR5250532	MMMOSAM:65fe19d9-4b40-459c-823f-26b3a236bded	PRJNA369475	SAMN06327938	Young BC	2017	29256859	WHM-2017-01-018			skin	invasive	0	45		5	5	5	GCF_009912635.1	0	reads	3024206	456655106	151	163	97.47	30	2692891	468455	32.81
SRR5250559	MMMOSAM:602e0002-c55b-47f1-9e27-e531880e8c6e	PRJNA369475	SAMN06327965	Young BC	2017	29256859	WHM-2017-01-018	Yes		nose	colonising	0	45					GCF_009912635.1	0	reads	2869420	433282420	151	155	97.56	32	2692945	468399	32.81
SRR5250660	MMMOSAM:4aac48fa-4487-4395-b666-bd7a6b50b9a9	PRJNA369475	SAMN06328066	Young BC	2017	29256859	WHM-2017-01-018			skin	invasive	0	45		4	4	4	GCF_009912635.1	0	reads	2698372	407454172	151	146	97.53	31	2693119	468455	32.81
SRR5250663	MMMOSAM:496aac71-4c02-4309-8d3b-79a0fadff10a	PRJNA369475	SAMN06328069	Young BC	2017	29256859	WHM-2017-01-018			skin	invasive	0	45		4	4	4	GCF_009912635.1	0	reads	3626052	547533852	151	196	97.64	30	2692750	468455	32.8
SRR5250755	MMMOSAM:33f29342-194b-477d-9edf-9adc1e93939c	PRJNA369475	SAMN06328161	Young BC	2017	29256859	WHM-2017-01-018			nose	colonising	0	45		3	3	3	GCF_009912635.1	0	reads	3162370	477517870	151	171	97.48	35	2693430	428321	32.81
SRR5249989	MMMOSAM:dfd730d6-673b-41d9-a348-28984c5855a3	PRJNA369475	SAMN06327395	Young BC	2017	29256859	WHM-2017-01-019			nose	colonising	0	39		0	0	0	GCF_003855575.1	0	reads	2290378	345847078	151	124	96.14	61	2783347	192117	32.78
SRR5250024	MMMOSAM:d7326f2b-9734-4691-be45-d625dbdb37d9	PRJNA369475	SAMN06327430	Young BC	2017	29256859	WHM-2017-01-019			nose	colonising	0	39		0	0	0	GCF_003855575.1	0	reads	2941860	444220860	151	159	96.2	61	2783163	192117	32.78
SRR5250165	MMMOSAM:b9a0a111-5b40-4037-8b9c-cc2a14dad3df	PRJNA369475	SAMN06327571	Young BC	2017	29256859	WHM-2017-01-019			nose	colonising	0	39		1	1	1	GCF_003855575.1	0	reads	3115170	470390670	151	168	95.73	49	2783831	175861	32.78
SRR5250381	MMMOSAM:85242bb7-93a5-416c-bbe2-280d31ea9727	PRJNA369475	SAMN06327787	Young BC	2017	29256859	WHM-2017-01-019		Yes	blood	invasive	-1	39		16	16	16	GCF_003855575.1	0	reads	2652490	400525990	151	143	96.67	60	2741396	170927	32.78
SRR5250393	MMMOSAM:831578f8-2b45-4f94-bc98-73592e6a5aa6	PRJNA369475	SAMN06327799	Young BC	2017	29256859	WHM-2017-01-019			blood	invasive	-1	39		16	16	16	GCF_003855575.1	0	reads	2782772	420198572	151	150	96.78	60	2741713	170740	32.78
SRR5250420	MMMOSAM:7caf5c0e-93b5-441d-9712-aa7d5890613c	PRJNA369475	SAMN06327826	Young BC	2017	29256859	WHM-2017-01-019			nose	colonising	0	39		9	9	9	GCF_003855575.1	0	reads	2858606	431649506	151	154	96.12	54	2782523	191929	32.78
SRR5250450	MMMOSAM:76101f03-74c8-4e99-b452-d9fe1dd84347	PRJNA369475	SAMN06327856	Young BC	2017	29256859	WHM-2017-01-019			blood	invasive	-1	39		16	16	16	GCF_003855575.1	0	reads	2736592	413225392	151	148	96.85	51	2740564	174983	32.78
SRR5250467	MMMOSAM:72cec570-23a0-409c-bb55-14267011e09b	PRJNA369475	SAMN06327873	Young BC	2017	29256859	WHM-2017-01-019			blood	invasive	-1	39		16	16	16	GCF_003855575.1	0	reads	2574516	388751916	151	139	96.97	56	2741313	174979	32.78
SRR5250550	MMMOSAM:618615aa-45fc-415c-aad7-4dd7914f4851	PRJNA369475	SAMN06327956	Young BC	2017	29256859	WHM-2017-01-019	Yes		nose	colonising	0	39					GCF_003855575.1	0	reads	2243360	338747360	151	121	96.14	54	2782524	192117	32.78
SRR5251324	MMMOSAM:17a3da84-5054-4002-b7a5-b04c14de7d6f	PRJNA369475	SAMN06328694	Young BC	2017	29256859	WHM-2017-01-019			blood	invasive	-1	39		16	16	16	GCF_003855575.1	0	reads	2406854	363434954	151	130	96.91	57	2741029	174979	32.78
SRR5250135	MMMOSAM:bed5afbe-bd3d-4d9e-9e51-d546c096756a	PRJNA369475	SAMN06327541	Young BC	2017	29256859	WHM-2017-01-020			blood	invasive	-1	45		4	4	4	GCF_009912635.1	0	reads	2704500	408379500	151	146	96.77	45	2733226	543543	32.74
SRR5250223	MMMOSAM:aa771c6a-40a3-45c0-b942-6d1769aae7cd	PRJNA369475	SAMN06327629	Young BC	2017	29256859	WHM-2017-01-020			nose	colonising	0	45		0	0	0	GCF_009912635.1	0	reads	2042092	308355892	151	110	96.68	48	2733592	543544	32.74
SRR5250329	MMMOSAM:9499f61d-16a8-4c59-8148-1f97de892616	PRJNA369475	SAMN06327735	Young BC	2017	29256859	WHM-2017-01-020	Yes		nose	colonising	0	45					GCF_009912635.1	0	reads	1969900	297454900	151	106	96.65	41	2732641	543544	32.74
SRR5250519	MMMOSAM:67b7fab8-2163-4cfc-b534-4771eb3c45a1	PRJNA369475	SAMN06327925	Young BC	2017	29256859	WHM-2017-01-020			nose	colonising	0	45		0	0	0	GCF_009912635.1	0	reads	2590196	391119596	151	140	96.6	37	2732176	543544	32.74
SRR5250672	MMMOSAM:473e5b14-caa1-4dd8-9bc0-3cabdb8d2162	PRJNA369475	SAMN06328078	Young BC	2017	29256859	WHM-2017-01-020			blood	invasive	-1	45		0	0	0	GCF_009912635.1	0	reads	2552082	385364382	151	138	96.8	43	2733799	544105	32.74
SRR5251298	MMMOSAM:1b882544-0ffe-43ae-bc0a-a75c202ffcd8	PRJNA369475	SAMN06328668	Young BC	2017	29256859	WHM-2017-01-020		Yes	blood	invasive	-1	45		0	0	0	GCF_009912635.1	0	reads	2742102	414057402	151	148	96.71	49	2734574	543544	32.75
SRR5251305	MMMOSAM:1ad551dd-9514-44c8-9df5-7ebc7c88eec3	PRJNA369475	SAMN06328675	Young BC	2017	29256859	WHM-2017-01-020			nose	colonising	0	45		0	0	0	GCF_009912635.1	0	reads	2991552	451724352	151	161	96.57	41	2733213	543544	32.74
SRR5251377	MMMOSAM:0bb30d9e-98d8-4d71-85be-a3aa967fb654	PRJNA369475	SAMN06328747	Young BC	2017	29256859	WHM-2017-01-020			nose	colonising	0	45		0	0	0	GCF_009912635.1	0	reads	2395992	361794792	151	129	96.67	37	2732428	543544	32.74
SRR5249860	MMMOSAM:fb228f3f-0080-4a61-8261-a0020ba4d10e	PRJNA369475	SAMN06327266	Young BC	2017	29256859	WHM-2017-01-021			blood	invasive	2	291		3	3	3	GCF_003609855.1	0	reads	2714914	409952014	151	147	98.13	75	2687771	154569	32.82
SRR5249883	MMMOSAM:f62e0887-fb8a-4c4e-a020-603fc03a5580	PRJNA369475	SAMN06327289	Young BC	2017	29256859	WHM-2017-01-021			nose	colonising	0	291		3	3	3	GCF_003609855.1	0	reads	2181696	329436096	151	118	97.64	69	2689158	211686	32.81
SRR5249988	MMMOSAM:e01d522f-cd0b-49ad-8a22-d498fb13850b	PRJNA369475	SAMN06327394	Young BC	2017	29256859	WHM-2017-01-021			blood	invasive	2	291		3	3	3	GCF_003609855.1	0	reads	1955228	295239428	151	105	98.23	62	2685941	211686	32.81
SRR5250305	MMMOSAM:9a7daed9-55c6-4f10-bd75-2ec8e1843020	PRJNA369475	SAMN06327711	Young BC	2017	29256859	WHM-2017-01-021			blood	invasive	2	291		3	3	3	GCF_003609855.1	0	reads	2531526	382260426	151	137	98.16	69	2686851	154486	32.81
SRR5250339	MMMOSAM:91d344f0-5e34-43e9-9a00-bc1714e54c17	PRJNA369475	SAMN06327745	Young BC	2017	29256859	WHM-2017-01-021			nose	colonising	0	291		0	0	0	GCF_003609855.1	0	reads	2792122	421610422	151	151	98.17	60	2686214	154501	32.81
SRR5250564	MMMOSAM:5ef76d8e-4791-499a-a7da-d4ab82e80c06	PRJNA369475	SAMN06327970	Young BC	2017	29256859	WHM-2017-01-021	Yes		nose	colonising	0	291					GCF_003609855.1	0	reads	2664138	402284838	151	144	98	71	2687561	149083	32.82
SRR5250595	MMMOSAM:585e9aef-45e1-4a59-a92d-582d5890e75e	PRJNA369475	SAMN06328001	Young BC	2017	29256859	WHM-2017-01-021			nose	colonising	0	291		4	4	4	GCF_003609855.1	0	reads	2243062	338702362	151	121	98.02	73	2687602	211685	32.82
SRR5250600	MMMOSAM:57c7605f-54de-462f-b4e2-e4f92150c8b0	PRJNA369475	SAMN06328006	Young BC	2017	29256859	WHM-2017-01-021			nose	colonising	0	291		5	5	5	GCF_003609855.1	0	reads	3172598	479062298	151	171	97.68	73	2689906	154426	32.81
SRR5251317	MMMOSAM:19208d4c-c928-40a5-891a-d64c6839bb5e	PRJNA369475	SAMN06328687	Young BC	2017	29256859	WHM-2017-01-021			blood	invasive	2	291		4	4	4	GCF_003609855.1	0	reads	2571726	388330626	151	139	98.05	74	2687760	149083	32.82
SRR5251334	MMMOSAM:1459810f-9555-4062-8373-0811caabb8f4	PRJNA369475	SAMN06328704	Young BC	2017	29256859	WHM-2017-01-021		Yes	blood	invasive	2	291		3	3	3	GCF_003609855.1	0	reads	2133752	322196552	151	115	98.17	66	2686646	211686	32.81
SRR5249835	MMMOSAM:ffb13071-6603-47c8-830b-919afb44898e	PRJNA369475	SAMN06327241	Young BC	2017	29256859	WHM-2017-01-022			nose	colonising	0	15		0	0	0	GCF_008694165.1	0	reads	2624250	396261750	151	142	97.11	66	2701607	249418	32.78
SRR5249851	MMMOSAM:fcaeef62-8434-4be0-a5e3-fbbba99e671b	PRJNA369475	SAMN06327257	Young BC	2017	29256859	WHM-2017-01-022			blood	invasive	0	15		9	9	9	GCF_008694165.1	0	reads	2350850	354978350	151	127	96.98	61	2701315	307455	32.78
SRR5249861	MMMOSAM:fb0e5ab8-8d15-4843-b173-08f5099880e7	PRJNA369475	SAMN06327267	Young BC	2017	29256859	WHM-2017-01-022			blood	invasive	0	15		9	9	9	GCF_008694165.1	0	reads	2793736	421854136	151	151	97.42	54	2700231	283525	32.77
SRR5249959	MMMOSAM:e4d7b17f-7119-44b4-a308-b086c8558682	PRJNA369475	SAMN06327365	Young BC	2017	29256859	WHM-2017-01-022	Yes		nose	colonising	0	15					GCF_008694165.1	0	reads	3441266	519631166	151	186	96.99	67	2701882	249418	32.78
SRR5250051	MMMOSAM:d224db4a-8bdc-464d-9c2d-c3623f721e61	PRJNA369475	SAMN06327457	Young BC	2017	29256859	WHM-2017-01-022			nose	colonising	0	15		2	1	1	GCF_008694165.1	0	reads	2656972	401202772	151	143	97.37	57	2700392	283525	32.77
SRR5250217	MMMOSAM:ab917411-51d5-49a8-a7c1-daca4527f3ba	PRJNA369475	SAMN06327623	Young BC	2017	29256859	WHM-2017-01-022			nose	colonising	0	15		1	1	1	GCF_008694165.1	0	reads	2809928	424299128	151	152	97.57	59	2700431	249418	32.77
SRR5250614	MMMOSAM:5571d203-d48e-475e-9258-ac7d15cd19e0	PRJNA369475	SAMN06328020	Young BC	2017	29256859	WHM-2017-01-022			blood	invasive	0	15		9	9	9	GCF_008694165.1	0	reads	2011838	303787538	151	108	97.14	75	2702633	283690	32.78
SRR5250802	MMMOSAM:2b46f430-e3bc-4020-abff-7752922590d8	PRJNA369475	SAMN06328208	Young BC	2017	29256859	WHM-2017-01-022			blood	invasive	0	15		9	9	9	GCF_008694165.1	0	reads	2362418	356725118	151	127	97.21	64	2701344	283386	32.77
SRR5250807	MMMOSAM:29b2aca8-ff82-4f8d-b289-e92f53aee336	PRJNA369475	SAMN06328213	Young BC	2017	29256859	WHM-2017-01-022		Yes	blood	invasive	0	15		9	9	9	GCF_008694165.1	0	reads	2969226	448353126	151	160	97.27	55	2700346	283525	32.77
SRR5251411	MMMOSAM:02328281-8d22-4203-b97a-6e8ebbf6c1ee	PRJNA369475	SAMN06328781	Young BC	2017	29256859	WHM-2017-01-022			nose	colonising	0	15		1	1	1	GCF_008694165.1	0	reads	3593808	542665008	151	194	97.08	63	2700955	249418	32.77
SRR5249943	MMMOSAM:e990a6e7-20ad-432a-b78a-1de7e9e7d758	PRJNA369475	SAMN06327349	Young BC	2017	29256859	WHM-2017-01-023			blood	invasive	0	1224		17	17	3	GCF_009912335.1	0	reads	2479682	374431982	151	134	98.55	72	2695396	149471	32.73
SRR5249984	MMMOSAM:e0632279-dd24-4cbe-8d90-a1343a79e818	PRJNA369475	SAMN06327390	Young BC	2017	29256859	WHM-2017-01-023			skin	invasive	0	1224		16	16	3	GCF_009912335.1	0	reads	3691748	557453948	151	199	98.19	80	2696254	127947	32.74
SRR5250316	MMMOSAM:9787d0ba-1051-479b-874c-05c5498b96d1	PRJNA369475	SAMN06327722	Young BC	2017	29256859	WHM-2017-01-023			skin	invasive	0	1224		17	17	3	GCF_009912335.1	0	reads	3643900	550228900	151	197	98.4	67	2694522	149291	32.73
SRR5250412	MMMOSAM:7dfcdc87-b0b8-4499-abef-acf824081336	PRJNA369475	SAMN06327818	Young BC	2017	29256859	WHM-2017-01-023			skin	invasive	0	1224		17	17	3	GCF_009912335.1	0	reads	3420790	516539290	151	185	98.51	69	2695091	149291	32.73
SRR5250419	MMMOSAM:7cbd9f3f-1451-466e-b8dd-8b35aa42e20e	PRJNA369475	SAMN06327825	Young BC	2017	29256859	WHM-2017-01-023			blood	invasive	0	1224		16	16	3	GCF_009912335.1	0	reads	2819524	425748124	151	152	98.22	63	2694136	149411	32.73
SRR5250515	MMMOSAM:68f854b4-4c77-4dbe-985c-6e814b0eee3a	PRJNA369475	SAMN06327921	Young BC	2017	29256859	WHM-2017-01-023			skin	invasive	0	1224		15	15	3	GCF_009912335.1	0	reads	2606764	393621364	151	141	98.55	62	2694478	184450	32.73
SRR5250538	MMMOSAM:64395de0-2055-4150-b2f7-21408746946a	PRJNA369475	SAMN06327944	Young BC	2017	29256859	WHM-2017-01-023			skin	invasive	0	1224		15	15	2	GCF_009912335.1	0	reads	2489854	375967954	151	134	98.46	69	2695076	184450	32.73
SRR5250676	MMMOSAM:46a5ac40-d6d4-4119-b90b-ea767e2c284f	PRJNA369475	SAMN06328082	Young BC	2017	29256859	WHM-2017-01-023			nose	colonising	0	1224		14	14	1	GCF_009912335.1	0	reads	3675080	554937080	151	198	98.22	75	2695993	149471	32.73
SRR5250703	MMMOSAM:3faea4e7-4e18-4731-b79d-b6d3667022a1	PRJNA369475	SAMN06328109	Young BC	2017	29256859	WHM-2017-01-023			nose	colonising	0	1224		13	13	0	GCF_009912335.1	0	reads	2959254	446847354	151	160	98.54	64	2694220	135651	32.73
SRR5250741	MMMOSAM:388d5f90-36e1-4448-a631-2e38bab7e755	PRJNA369475	SAMN06328147	Young BC	2017	29256859	WHM-2017-01-023			nose	colonising	0	1224		13	13	0	GCF_009912335.1	0	reads	3559128	537428328	151	192	98.32	69	2695632	127785	32.73
SRR5250804	MMMOSAM:2aa65c6d-924d-405f-a96a-caedcb0ec657	PRJNA369475	SAMN06328210	Young BC	2017	29256859	WHM-2017-01-023			blood	invasive	0	1224		16	16	3	GCF_009912335.1	0	reads	3052746	460964646	151	165	98.44	71	2695655	149411	32.73
SRR5251320	MMMOSAM:188d8b18-6c24-4546-9812-c7dc01fb32fe	PRJNA369475	SAMN06328690	Young BC	2017	29256859	WHM-2017-01-023			nose	colonising	0	1224		13	13	0	GCF_009912335.1	0	reads	2929568	442364768	151	158	98.39	66	2694518	153701	32.73
SRR5251380	MMMOSAM:0ad5ba70-9512-4c61-891e-1a284da1c1fd	PRJNA369475	SAMN06328750	Young BC	2017	29256859	WHM-2017-01-023	Yes		nose	colonising	0	1224					GCF_009912335.1	0	reads	2520124	380538724	151	136	98.59	70	2695308	154017	32.73
SRR5251385	MMMOSAM:09b12758-d905-4fb0-88f2-6fba7435d40d	PRJNA369475	SAMN06328755	Young BC	2017	29256859	WHM-2017-01-023		Yes	blood	invasive	0	1224		17	17	4	GCF_009912335.1	0	reads	2974986	449222886	151	161	98.47	69	2695447	127968	32.73
SRR5249886	MMMOSAM:f5b02f95-e9e8-4e1d-8b15-9c9232e79bfa	PRJNA369475	SAMN06327292	Young BC	2017	29256859	WHM-2017-01-024		Yes	bone	invasive	1	45		12	12	12	GCF_009912635.1	0	reads	2762826	417186726	151	149	97.5	41	2700998	844671	32.81
SRR5249957	MMMOSAM:e54e48bc-abad-49ab-a959-57fb89826ff9	PRJNA369475	SAMN06327363	Young BC	2017	29256859	WHM-2017-01-024			bone	invasive	1	45		12	12	12	GCF_009912635.1	0	reads	2065766	311930666	151	111	97.33	48	2702132	247079	32.81
SRR5250434	MMMOSAM:7915bf74-cd2a-4168-a2a6-4f5e87d17680	PRJNA369475	SAMN06327840	Young BC	2017	29256859	WHM-2017-01-024			nose	colonising	0	45		0	0	0	GCF_009912635.1	0	reads	2775592	419114392	151	150	97.24	54	2702787	247079	32.81
SRR5250448	MMMOSAM:76392d05-428e-4b08-b7a9-5590f2f0256b	PRJNA369475	SAMN06327854	Young BC	2017	29256859	WHM-2017-01-024			bone	invasive	1	45		12	12	12	GCF_009912635.1	0	reads	2815336	425115736	151	152	97.45	47	2701990	314298	32.81
SRR5250474	MMMOSAM:71ae86b3-4db5-4383-9e05-04b49d887edd	PRJNA369475	SAMN06327880	Young BC	2017	29256859	WHM-2017-01-024	Yes		nose	colonising	0	45					GCF_009912635.1	0	reads	2738698	413543398	151	148	97.68	40	2700833	636388	32.81
SRR5250527	MMMOSAM:66ad35bc-ad68-424a-916c-fc5cee7ccfdb	PRJNA369475	SAMN06327933	Young BC	2017	29256859	WHM-2017-01-024			nose	colonising	0	45		0	0	0	GCF_009912635.1	0	reads	2148934	324489034	151	116	97.65	47	2701894	844615	32.81
SRR5250539	MMMOSAM:64168dc7-5ccc-47d0-b7fc-6d1b44618c46	PRJNA369475	SAMN06327945	Young BC	2017	29256859	WHM-2017-01-024			bone	invasive	1	45		12	12	12	GCF_009912635.1	0	reads	3596572	543082372	151	194	97.39	49	2702352	343794	32.81
SRR5250770	MMMOSAM:30a1ac26-e528-4bc1-b8b9-70c3c474fea1	PRJNA369475	SAMN06328176	Young BC	2017	29256859	WHM-2017-01-024			nose	colonising	0	45		0	0	0	GCF_009912635.1	0	reads	2871956	433665356	151	155	97.59	41	2701196	636388	32.81
SRR5250810	MMMOSAM:29144cae-3457-4995-8807-4d934c002375	PRJNA369475	SAMN06328216	Young BC	2017	29256859	WHM-2017-01-024			nose	colonising	0	45		1	1	1	GCF_009912635.1	0	reads	2541024	383694624	151	137	97.27	47	2701909	523700	32.81
SRR5251352	MMMOSAM:10156d9e-1e5c-4076-a4c9-428e8e60ae09	PRJNA369475	SAMN06328722	Young BC	2017	29256859	WHM-2017-01-024			bone	invasive	1	45		12	12	12	GCF_009912635.1	0	reads	2141802	323412102	151	115	97.21	55	2703020	247079	32.82
SRR5250001	MMMOSAM:dc1a4f16-9a84-4791-88cd-ed9830967917	PRJNA369475	SAMN06327407	Young BC	2017	29256859	WHM-2017-01-025			nose	colonising	0	5		17	17	17	GCF_008630855.1	0	reads	2688934	406029034	151	145	96.34	51	2754733	706086	32.76
SRR5250155	MMMOSAM:bb113b78-fde7-486e-8f78-1a82da276882	PRJNA369475	SAMN06327561	Young BC	2017	29256859	WHM-2017-01-025			nose	colonising	0	5		0	0	0	GCF_008630855.1	0	reads	2358954	356202054	151	127	96.09	51	2754715	299856	32.76
SRR5250211	MMMOSAM:ac97b881-4776-4fd6-8be3-4cf889cded5e	PRJNA369475	SAMN06327617	Young BC	2017	29256859	WHM-2017-01-025			nose	colonising	0	5		0	0	0	GCF_008630855.1	0	reads	2010740	303621740	151	108	96.32	46	2754092	243587	32.76
SRR5250220	MMMOSAM:ab1f1e9c-6434-4c8d-944d-b395ab10809f	PRJNA369475	SAMN06327626	Young BC	2017	29256859	WHM-2017-01-025			blood	invasive	-1	5		17	17	17	GCF_008630855.1	0	reads	2309626	348753526	151	125	96.73	46	2754179	764217	32.76
SRR5250653	MMMOSAM:4cd6a77b-b456-479c-8ca5-f80515de5b68	PRJNA369475	SAMN06328059	Young BC	2017	29256859	WHM-2017-01-025			blood	invasive	-1	5		19	19	19	GCF_008630855.1	0	reads	2361070	356521570	151	127	96.71	47	2754212	764218	32.76
SRR5250659	MMMOSAM:4b688064-1cf9-4844-845f-b4a2dd57eba6	PRJNA369475	SAMN06328065	Young BC	2017	29256859	WHM-2017-01-025			blood	invasive	-1	5		16	16	16	GCF_008630855.1	0	reads	3114970	470360470	151	168	96.33	47	2757390	764217	32.75
SRR5250785	MMMOSAM:2eca6ca9-4b5a-49fd-88f1-dc4990eff55c	PRJNA369475	SAMN06328191	Young BC	2017	29256859	WHM-2017-01-025	Yes		nose	colonising	0	5					GCF_008630855.1	0	reads	3021748	456283948	151	163	96.33	43	2753634	764218	32.76
SRR5250794	MMMOSAM:2c76cac5-e37b-4aa0-afdc-1a86c0f1cfe8	PRJNA369475	SAMN06328200	Young BC	2017	29256859	WHM-2017-01-025			blood	invasive	-1	5		17	17	17	GCF_008630855.1	0	reads	2736792	413255592	151	148	96.6	47	2753673	764206	32.76
SRR5251403	MMMOSAM:036d8f5b-ba7f-43b8-bc01-5781f8a8d4b3	PRJNA369475	SAMN06328773	Young BC	2017	29256859	WHM-2017-01-025		Yes	blood	invasive	-1	5		19	19	19	GCF_008630855.1	0	reads	2555758	385919458	151	138	96.55	47	2754265	764206	32.76
SRR5249972	MMMOSAM:e2f7062e-0292-46b0-abb5-48ce75455949	PRJNA369475	SAMN06327378	Young BC	2017	29256859	WHM-2017-01-026			nose	colonising	0	189		3	1	0	GCF_009912475.1	0	reads	2958952	446801752	151	160	92.5	187	2968697	150349	32.72
SRR5249994	MMMOSAM:de0edf9e-79f4-49f2-b2f4-1baa64dcfa1f	PRJNA369475	SAMN06327400	Young BC	2017	29256859	WHM-2017-01-026			nose	colonising	0	189		1	1	0	GCF_009912475.1	0	reads	2876716	434384116	151	155	92.2	190	2969729	171057	32.72
SRR5250185	MMMOSAM:b31ba7f5-0399-4456-bb50-ee48e0d39a2a	PRJNA369475	SAMN06327591	Young BC	2017	29256859	WHM-2017-01-026			skin	invasive	0	189		10	10	6	GCF_009912475.1	0	reads	2880602	434970902	151	155	92.46	181	2968201	150349	32.72
SRR5250291	MMMOSAM:9c82e94e-fafa-4e92-9736-276117c94502	PRJNA369475	SAMN06327697	Young BC	2017	29256859	WHM-2017-01-026			skin	invasive	0	189		11	9	6	GCF_009912475.1	0	reads	2724296	411368696	151	147	92.35	180	2967783	171057	32.72
SRR5250332	MMMOSAM:93cc7ee1-25cb-4643-bf9b-2860e6428882	PRJNA369475	SAMN06327738	Young BC	2017	29256859	WHM-2017-01-026			nose	colonising	0	189		1	1	0	GCF_009912475.1	0	reads	3077784	464745384	151	166	92.44	179	2968499	171057	32.72
SRR5250415	MMMOSAM:7da90e59-0bb5-47ec-bf37-1ff96c627806	PRJNA369475	SAMN06327821	Young BC	2017	29256859	WHM-2017-01-026	Yes		nose	colonising	0	189					GCF_009912475.1	0	reads	3310494	499884594	151	179	92.19	186	2970071	139367	32.72
SRR5250477	MMMOSAM:711de7c3-9201-4cc3-acb4-1300cf7d4def	PRJNA369475	SAMN06327883	Young BC	2017	29256859	WHM-2017-01-026			skin	invasive	0	189		11	10	7	GCF_009912475.1	0	reads	2939404	443850004	151	159	92.29	187	2970128	128307	32.72
SRR5250483	MMMOSAM:70780462-6cb3-4ea3-9520-6684e250511f	PRJNA369475	SAMN06327889	Young BC	2017	29256859	WHM-2017-01-026			skin	invasive	0	189		8	8	6	GCF_009912475.1	0	reads	2528476	381799876	151	136	92.39	190	2968870	150349	32.72
SRR5250645	MMMOSAM:4f66b689-ed80-456f-831d-b33f8cb9de43	PRJNA369475	SAMN06328051	Young BC	2017	29256859	WHM-2017-01-026		Yes	skin	invasive	0	189		12	10	6	GCF_009912475.1	0	reads	2496832	377021632	151	135	92.7	183	2969080	171057	32.72
SRR5251402	MMMOSAM:03832f70-c631-4942-8bb4-7b277a6f9da8	PRJNA369475	SAMN06328772	Young BC	2017	29256859	WHM-2017-01-026			nose	colonising	0	189		3	1	0	GCF_009912475.1	0	reads	2850952	430493752	151	154	92.37	167	2966362	150349	32.72
SRR5249930	MMMOSAM:ee09cce1-72a7-49b7-910b-8c47fe037df2	PRJNA369475	SAMN06327336	Young BC	2017	29256859	WHM-2017-01-027			nose	colonising	0	59		1	0	0	GCF_009912335.1	0	reads	2618808	395440008	151	141	97.28	85	2755707	154018	32.74
SRR5250025	MMMOSAM:d71c23b6-1a36-4d5a-82c8-c05b8ef90f8b	PRJNA369475	SAMN06327431	Young BC	2017	29256859	WHM-2017-01-027			nose	colonising	0	59		2	2	2	GCF_009912335.1	0	reads	2451170	370126670	151	132	97.23	85	2755750	153702	32.74
SRR5250037	MMMOSAM:d3d070b8-65e3-486b-8794-9b01e5220644	PRJNA369475	SAMN06327443	Young BC	2017	29256859	WHM-2017-01-027			bone	invasive	-6	59		4	3	3	GCF_009912335.1	0	reads	3019122	455887422	151	163	97.07	85	2755739	149324	32.74
SRR5250039	MMMOSAM:d3cb3aaf-51bf-4b9a-a1c8-c61b6c56f3b2	PRJNA369475	SAMN06327445	Young BC	2017	29256859	WHM-2017-01-027	Yes		nose	colonising	0	59					GCF_009912335.1	0	reads	2407706	363563606	151	130	97.13	82	2755153	154018	32.74
SRR5250056	MMMOSAM:d171ab1a-ee46-41ca-a7a3-ee81f61bddbf	PRJNA369475	SAMN06327462	Young BC	2017	29256859	WHM-2017-01-027			nose	colonising	0	59		1	0	0	GCF_009912335.1	0	reads	2977324	449575924	151	161	97.2	85	2755704	154018	32.74
SRR5250309	MMMOSAM:99670528-ab95-4e4b-99b8-c19c370f1bb9	PRJNA369475	SAMN06327715	Young BC	2017	29256859	WHM-2017-01-027		Yes	bone	invasive	-6	59		4	3	3	GCF_009912335.1	0	reads	2258438	341024138	151	122	97.36	79	2754900	154018	32.74
SRR5250472	MMMOSAM:722be188-0c95-40c5-9b75-7483975ae5ce	PRJNA369475	SAMN06327878	Young BC	2017	29256859	WHM-2017-01-027			bone	invasive	-6	59		4	3	3	GCF_009912335.1	0	reads	2578176	389304576	151	139	96.62	83	2755430	154018	32.74
SRR5250609	MMMOSAM:568b67f3-f05b-44a0-9a11-4a02396e8079	PRJNA369475	SAMN06328015	Young BC	2017	29256859	WHM-2017-01-027			bone	invasive	-6	59		5	4	4	GCF_009912335.1	0	reads	2429420	366842420	151	131	97.03	78	2754674	154402	32.74
SRR5250634	MMMOSAM:5191c25c-b905-4fb6-a031-4b803e4d7e76	PRJNA369475	SAMN06328040	Young BC	2017	29256859	WHM-2017-01-027			bone	invasive	-6	59		4	3	3	GCF_009912335.1	0	reads	3346632	505341432	151	181	96.76	87	2755883	149324	32.74
SRR5251333	MMMOSAM:14836301-f07d-4a6b-aac9-d305512b0916	PRJNA369475	SAMN06328703	Young BC	2017	29256859	WHM-2017-01-027			nose	colonising	0	59		0	0	0	GCF_009912335.1	0	reads	2110454	318678554	151	114	97.04	80	2755591	154402	32.74
SRR5250086	MMMOSAM:cb37cb89-ac29-4080-bb3a-0b17e0329ed7	PRJNA369475	SAMN06327492	Young BC	2017	29256859	WHM-2017-01-028			blood	invasive	0	8	Yes	2	2	2	GCF_001580515.1	0	reads	2282214	344614314	151	123	92.76	40	2922939	627733	32.66
SRR5250092	MMMOSAM:ca6c2f63-46fa-4687-896f-7f2a73735aee	PRJNA369475	SAMN06327498	Young BC	2017	29256859	WHM-2017-01-028			nose	colonising	0	8	Yes	0	0	0	GCF_001580515.1	0	reads	2590778	391207478	151	140	92.83	40	2922613	705601	32.66
SRR5250193	MMMOSAM:b08fbf11-4056-4fb2-8e77-1aadd48ca471	PRJNA369475	SAMN06327599	Young BC	2017	29256859	WHM-2017-01-028			nose	colonising	0	8	Yes	0	0	0	GCF_001580515.1	0	reads	2558438	386324138	151	138	93.02	37	2922689	627853	32.66
SRR5250307	MMMOSAM:9a26fe4a-0b46-4715-9ae2-fae01dafbbed	PRJNA369475	SAMN06327713	Young BC	2017	29256859	WHM-2017-01-028		Yes	blood	invasive	0	8	Yes	2	2	2	GCF_001580515.1	0	reads	2614794	394833894	151	141	93.05	40	2922491	404896	32.66
SRR5250408	MMMOSAM:7ef856f1-0747-47df-9e44-165725a558a3	PRJNA369475	SAMN06327814	Young BC	2017	29256859	WHM-2017-01-028	Yes		nose	colonising	0	8	Yes				GCF_001580515.1	0	reads	2204188	332832388	151	119	92.94	41	2923347	705171	32.66
SRR5250413	MMMOSAM:7de154c8-a279-4145-bf7e-6ff1c0cb056e	PRJNA369475	SAMN06327819	Young BC	2017	29256859	WHM-2017-01-028			nose	colonising	0	8	Yes	0	0	0	GCF_001580515.1	0	reads	2824162	426448462	151	152	92.69	42	2922538	705601	32.66
SRR5250722	MMMOSAM:3cc7df64-5362-402a-bd00-c27eac29f5c8	PRJNA369475	SAMN06328128	Young BC	2017	29256859	WHM-2017-01-028			blood	invasive	0	8	Yes	2	2	2	GCF_001580515.1	0	reads	2252388	340110588	151	121	93.17	47	2922776	367205	32.66
SRR5250738	MMMOSAM:391ecf1e-2edd-4360-8dcf-6d4ccfddceb5	PRJNA369475	SAMN06328144	Young BC	2017	29256859	WHM-2017-01-028			blood	invasive	0	8	Yes	2	2	2	GCF_001580515.1	0	reads	3374706	509580606	151	182	93.37	54	2923463	713518	32.66
SRR5250820	MMMOSAM:25f0cfd1-0d91-422a-ab47-c160f9d17451	PRJNA369475	SAMN06328226	Young BC	2017	29256859	WHM-2017-01-028			blood	invasive	0	8	Yes	2	2	2	GCF_001580515.1	0	reads	2114802	319335102	151	114	92.91	56	2923366	705601	32.66
SRR5249876	MMMOSAM:f756149c-0f65-496b-88f6-cfede6485cb5	PRJNA369475	SAMN06327282	Young BC	2017	29256859	WHM-2017-01-029		Yes	skin	invasive	0	30		0	0	0	GCF_013467165.1	0	reads	2120808	320242008	151	114	93.51	121	2900405	123717	32.74
SRR5250071	MMMOSAM:cef3c14a-44d4-469d-a76b-61c09fc35fb8	PRJNA369475	SAMN06327477	Young BC	2017	29256859	WHM-2017-01-029			skin	invasive	0	30		1	1	0	GCF_013467165.1	0	reads	2145298	323939998	151	116	93.65	122	2901288	129729	32.74
SRR5250075	MMMOSAM:ce612731-5065-4f52-be78-eb9fa50e1072	PRJNA369475	SAMN06327481	Young BC	2017	29256859	WHM-2017-01-029	Yes		nose	colonising	0	30					GCF_013467165.1	0	reads	2442168	368767368	151	132	93.7	122	2900695	140425	32.74
SRR5250418	MMMOSAM:7d1459b6-d41f-45c4-b235-a5f49dfd650a	PRJNA369475	SAMN06327824	Young BC	2017	29256859	WHM-2017-01-029			nose	colonising	0	30		0	0	0	GCF_013467165.1	0	reads	2845090	429608590	151	154	93.76	119	2900306	140425	32.74
SRR5250422	MMMOSAM:7bb61fc8-8457-4ade-a2ad-304849fb9166	PRJNA369475	SAMN06327828	Young BC	2017	29256859	WHM-2017-01-029			skin	invasive	0	30		1	1	0	GCF_013467165.1	0	reads	2301200	347481200	151	124	93.43	125	2901560	115505	32.74
SRR5250432	MMMOSAM:7942d1de-6009-44e7-8953-39c3c640e05e	PRJNA369475	SAMN06327838	Young BC	2017	29256859	WHM-2017-01-029			nose	colonising	0	30		0	0	0	GCF_013467165.1	0	reads	2156812	325678612	151	116	93.52	122	2901102	134498	32.74
SRR5250505	MMMOSAM:6b51fbb4-cbce-4a1c-8854-d6645f048f47	PRJNA369475	SAMN06327911	Young BC	2017	29256859	WHM-2017-01-029			nose	colonising	0	30		0	0	0	GCF_013467165.1	0	reads	2661856	401940256	151	144	93.5	123	2901121	123717	32.74
SRR5250540	MMMOSAM:63f5fad2-c055-4e2e-ab39-ae52d34c5bcf	PRJNA369475	SAMN06327946	Young BC	2017	29256859	WHM-2017-01-029			skin	invasive	0	30		1	1	0	GCF_013467165.1	0	reads	1764278	266405978	151	95	93.75	116	2901246	140425	32.74
SRR5250619	MMMOSAM:54e9081c-97e2-4572-87d9-839987769d54	PRJNA369475	SAMN06328025	Young BC	2017	29256859	WHM-2017-01-029			skin	invasive	0	30		0	0	0	GCF_013467165.1	0	reads	3859460	385946000	100	138	92.26	203	2900331	127901	32.76
SRR5249855	MMMOSAM:fc12ee81-ff51-40b3-a0c5-b8f26b79e8de	PRJNA369475	SAMN06327261	Young BC	2017	29256859	WHM-2017-01-030			skin	invasive	1	1		0	0	0	GCF_002356655.1	0	reads	1841640	278087640	151	99	96.76	26	2781550	1402391	32.7
SRR5249916	MMMOSAM:f0134896-1483-4d8e-bf1a-1fe6a4ca1f99	PRJNA369475	SAMN06327322	Young BC	2017	29256859	WHM-2017-01-030			nose	colonising	0	1		3	3	3	GCF_002356655.1	0	reads	2361496	356585896	151	127	96.68	24	2781655	1402335	32.7
SRR5250159	MMMOSAM:bacea0c7-6120-4649-9dda-00145a39073e	PRJNA369475	SAMN06327565	Young BC	2017	29256859	WHM-2017-01-030			skin	invasive	1	1		0	0	0	GCF_002356655.1	0	reads	2736990	413285490	151	148	96.52	25	2781783	1402391	32.7
SRR5250218	MMMOSAM:ab85f5fe-6a87-4f89-b9d9-36f56a5d2c6f	PRJNA369475	SAMN06327624	Young BC	2017	29256859	WHM-2017-01-030			skin	invasive	1	1		0	0	0	GCF_002356655.1	0	reads	1742234	263077334	151	94	96.63	25	2781974	1402391	32.7
SRR5250227	MMMOSAM:a98a366b-9076-4c20-a05f-2c6260f8e10b	PRJNA369475	SAMN06327633	Young BC	2017	29256859	WHM-2017-01-030			nose	colonising	0	1		1	1	1	GCF_002356655.1	0	reads	1657156	250230556	151	89	96.39	23	2781517	1402391	32.7
SRR5250310	MMMOSAM:9948bfa6-2eab-46b3-8c9a-b5fd22e29ca8	PRJNA369475	SAMN06327716	Young BC	2017	29256859	WHM-2017-01-030			nose	colonising	0	1		16	16	16	GCF_002356655.1	0	reads	1812306	273658206	151	98	96.39	22	2782302	1030614	32.7
SRR5250423	MMMOSAM:7ba5310b-d51d-45d1-8075-d3d50e8171fc	PRJNA369475	SAMN06327829	Young BC	2017	29256859	WHM-2017-01-030		Yes	skin	invasive	1	1		0	0	0	GCF_002356655.1	0	reads	2489066	375848966	151	134	96.43	25	2781589	714295	32.7
SRR5250435	MMMOSAM:78b22b63-2175-4f74-888f-4dd24f07c54c	PRJNA369475	SAMN06327841	Young BC	2017	29256859	WHM-2017-01-030	Yes		nose	colonising	0	1					GCF_002356655.1	0	reads	2473294	373467394	151	133	96.35	27	2782196	1029592	32.7
SRR5250571	MMMOSAM:5d7013ac-3b8b-4d87-ae5d-352bfacf7e07	PRJNA369475	SAMN06327977	Young BC	2017	29256859	WHM-2017-01-030			skin	invasive	1	1		0	0	0	GCF_002356655.1	0	reads	1652090	249465590	151	89	96.51	24	2781822	1402391	32.7
SRR5250643	MMMOSAM:4f8edc3b-e49c-4c04-b913-e53ffc97f42f	PRJNA369475	SAMN06328049	Young BC	2017	29256859	WHM-2017-01-030			nose	colonising	0	1		16	16	16	GCF_002356655.1	0	reads	2260610	341352110	151	122	96.29	27	2783064	589859	32.7
SRR5249910	MMMOSAM:f180e433-cf3c-4ea6-8dd2-23f3a614911c	PRJNA369475	SAMN06327316	Young BC	2017	29256859	WHM-2017-01-031			skin	invasive	3	5		13	13	13	GCF_003194405.1	0	reads	2619850	395597350	151	141	93.71	68	2788030	212405	32.76
SRR5250325	MMMOSAM:95f641f5-fc4e-4881-849d-594a48317f7c	PRJNA369475	SAMN06327731	Young BC	2017	29256859	WHM-2017-01-031			skin	invasive	3	5		14	14	14	GCF_003194405.1	0	reads	1830398	276390098	151	99	94.2	61	2787247	212405	32.76
SRR5250338	MMMOSAM:926a749b-d8c0-4d27-b35c-e09131032cd7	PRJNA369475	SAMN06327744	Young BC	2017	29256859	WHM-2017-01-031		Yes	blood	invasive	-4	5		13	13	13	GCF_003194405.1	0	reads	1075114	162342214	151	58	93.86	68	2788002	212405	32.76
SRR5250363	MMMOSAM:8b69f90a-49a3-4d3d-97e5-1d7b0cee0791	PRJNA369475	SAMN06327769	Young BC	2017	29256859	WHM-2017-01-031			skin	invasive	3	5		13	13	13	GCF_003194405.1	0	reads	2199540	332130540	151	119	94.19	61	2787299	189603	32.76
SRR5250379	MMMOSAM:8621332d-0142-4beb-bc52-acdbc3df9166	PRJNA369475	SAMN06327785	Young BC	2017	29256859	WHM-2017-01-031	Yes		nose	colonising	0	5					GCF_003194405.1	0	reads	2134252	322272052	151	115	94.2	59	2787322	283708	32.76
SRR5250537	MMMOSAM:6479bb3d-92bd-4c70-97ab-1a2ec3faed9c	PRJNA369475	SAMN06327943	Young BC	2017	29256859	WHM-2017-01-031			nose	colonising	0	5		5	5	5	GCF_003194405.1	0	reads	2189328	330588528	151	118	94.44	55	2786651	283708	32.75
SRR5250652	MMMOSAM:4d921eca-c21e-43ea-a02f-4d6852aaae09	PRJNA369475	SAMN06328058	Young BC	2017	29256859	WHM-2017-01-031			skin	invasive	3	5		13	13	13	GCF_003194405.1	0	reads	1947496	294071896	151	105	94.43	51	2786170	325955	32.75
SRR5250829	MMMOSAM:242d58e5-71e8-45b4-8efb-65ba86c6468c	PRJNA369475	SAMN06328235	Young BC	2017	29256859	WHM-2017-01-031			skin	invasive	3	5		13	13	13	GCF_003194405.1	0	reads	2114280	319256280	151	114	94.61	53	2786255	326339	32.75
SRR5251368	MMMOSAM:0da963e0-45ef-4d49-958f-14c5e8d5d192	PRJNA369475	SAMN06328738	Young BC	2017	29256859	WHM-2017-01-031			nose	colonising	0	5		9	9	9	GCF_003194405.1	0	reads	1978520	298756520	151	107	94.4	52	2786253	326339	32.75
SRR5249902	MMMOSAM:f2d13fca-99f0-41c4-8ffa-70c62217bf80	PRJNA369475	SAMN06327308	Young BC	2017	29256859	WHM-2017-01-032	Yes		nose	colonising	0	5					GCF_014336995.1	0	reads	2521010	380672510	151	136	96.4	43	2742185	688889	32.78
SRR5250020	MMMOSAM:d89b676e-6ad8-417a-be21-1e3f79b9399b	PRJNA369475	SAMN06327426	Young BC	2017	29256859	WHM-2017-01-032			nose	colonising	0	5		3	3	3	GCF_014336995.1	0	reads	2182418	329545118	151	118	95.44	64	2745146	168367	32.79
SRR5250115	MMMOSAM:c5f3cf88-a651-4d58-ae02-b698fd5d169a	PRJNA369475	SAMN06327521	Young BC	2017	29256859	WHM-2017-01-032			skin	invasive	0	5		6	6	6	GCF_014336995.1	0	reads	2033528	307062728	151	110	96.4	49	2743061	690419	32.78
SRR5250513	MMMOSAM:69015916-9d52-4dbf-b2f3-4ca470cdaeab	PRJNA369475	SAMN06327919	Young BC	2017	29256859	WHM-2017-01-032			skin	invasive	0	5		6	6	6	GCF_014336995.1	0	reads	1983680	299535680	151	107	96.42	45	2742814	688889	32.78
SRR5250606	MMMOSAM:56ef32b0-c6c9-4990-af89-5924ea3969fd	PRJNA369475	SAMN06328012	Young BC	2017	29256859	WHM-2017-01-032			nose	colonising	0	5		16	16	16	GCF_014336995.1	0	reads	1819508	274745708	151	98	96.61	59	2744787	690308	32.78
SRR5250666	MMMOSAM:48c770f8-a94d-41b8-b0fc-aede54054257	PRJNA369475	SAMN06328072	Young BC	2017	29256859	WHM-2017-01-032			skin	invasive	0	5		6	6	6	GCF_014336995.1	0	reads	2258404	341019004	151	122	96.63	51	2743411	690308	32.78
SRR5250734	MMMOSAM:39fecc1d-2ec1-4400-a304-829142bc1b22	PRJNA369475	SAMN06328140	Young BC	2017	29256859	WHM-2017-01-032			nose	colonising	0	5		1	1	1	GCF_014336995.1	0	reads	2253440	340269440	151	122	96.24	60	2744610	690308	32.78
SRR5251286	MMMOSAM:1d96765a-4ab2-4774-a643-a92c80bca8ee	PRJNA369475	SAMN06328656	Young BC	2017	29256859	WHM-2017-01-032		Yes	skin	invasive	0	5		6	6	6	GCF_014336995.1	0	reads	1724388	260382588	151	93	96.61	55	2743971	690419	32.78
SRR5251303	MMMOSAM:1af60eef-5349-404d-ba4c-36c1c7e34e89	PRJNA369475	SAMN06328673	Young BC	2017	29256859	WHM-2017-01-032			nose	colonising	0	5		2	2	2	GCF_014336995.1	0	reads	2262296	341606696	151	122	96.06	49	2743274	348911	32.78
SRR5251372	MMMOSAM:0d3a99c6-9784-475e-9837-f93c6ea6584b	PRJNA369475	SAMN06328742	Young BC	2017	29256859	WHM-2017-01-032			skin	invasive	0	5		6	6	6	GCF_014336995.1	0	reads	1845344	278646944	151	99	96.52	60	2744231	690539	32.78
SRR5249971	MMMOSAM:e3396ce3-e40a-441e-be2c-b68c36a02a48	PRJNA369475	SAMN06327377	Young BC	2017	29256859	WHM-2017-01-033			nose	colonising	0	22	Yes	1	1	1	GCF_900620235.1	0	reads	1984800	299704800	151	107	95.61	86	2772064	146382	32.7
SRR5250117	MMMOSAM:c5b73a20-7bdc-46b3-aa5b-9c0922c12c7e	PRJNA369475	SAMN06327523	Young BC	2017	29256859	WHM-2017-01-033			skin	invasive	1	22	Yes	0	0	0	GCF_900620235.1	0	reads	2388990	360737490	151	129	95.83	72	2771507	150763	32.7
SRR5250195	MMMOSAM:b070a3df-8022-43ac-8a72-f82c8ad1a14d	PRJNA369475	SAMN06327601	Young BC	2017	29256859	WHM-2017-01-033			skin	invasive	1	22	Yes	0	0	0	GCF_900620235.1	0	reads	1985980	299882980	151	107	95.76	94	2775919	150186	32.7
SRR5250495	MMMOSAM:6d34068f-3da1-4c5c-b8f1-488d74632d6d	PRJNA369475	SAMN06327901	Young BC	2017	29256859	WHM-2017-01-033		Yes	skin	invasive	1	22	Yes	0	0	0	GCF_900620235.1	0	reads	1153790	174222290	151	62	95.79	96	2774168	141234	32.71
SRR5250615	MMMOSAM:5541840f-5bdc-4c94-98a1-a6fb6def0d92	PRJNA369475	SAMN06328021	Young BC	2017	29256859	WHM-2017-01-033	Yes		nose	colonising	0	22	Yes				GCF_900620235.1	0	reads	1797088	271360288	151	97	95.55	96	2774167	146382	32.7
SRR5250623	MMMOSAM:53d4756c-e54e-4c64-b595-b3f2b7a797f5	PRJNA369475	SAMN06328029	Young BC	2017	29256859	WHM-2017-01-033			skin	invasive	1	22	Yes	1	1	1	GCF_900620235.1	0	reads	1523816	230096216	151	82	95.58	81	2772582	150186	32.7
SRR5250679	MMMOSAM:4669f591-cefe-4824-81f1-811d736fb604	PRJNA369475	SAMN06328085	Young BC	2017	29256859	WHM-2017-01-033			nose	colonising	0	22	Yes	0	0	0	GCF_900620235.1	0	reads	1911482	288633782	151	103	95.2	85	2772504	150186	32.7
SRR5251315	MMMOSAM:19319f82-6454-4a4c-89fa-8622f41dec18	PRJNA369475	SAMN06328685	Young BC	2017	29256859	WHM-2017-01-033			nose	colonising	0	22	Yes	0	0	0	GCF_900620235.1	0	reads	2271544	343003144	151	122	95.47	81	2771899	146924	32.7
SRR5251389	MMMOSAM:079307f7-6dca-438e-8015-554b5bb07aaf	PRJNA369475	SAMN06328759	Young BC	2017	29256859	WHM-2017-01-033			skin	invasive	1	22	Yes	0	0	0	GCF_900620235.1	0	reads	2668910	403005410	151	144	95.53	80	2772805	146924	32.7
SRR5249847	MMMOSAM:fdb20974-2c3a-489f-af31-9f66e19ccccc	PRJNA369475	SAMN06327253	Young BC	2017	29256859	WHM-2017-01-034			skin	invasive	1	97		10	10	6	GCF_005153305.1	0	reads	1846638	278842338	151	99	97.58	38	2741970	672887	32.7
SRR5249932	MMMOSAM:ede8e297-eed2-44d8-a72c-6f7ff0cb8277	PRJNA369475	SAMN06327338	Young BC	2017	29256859	WHM-2017-01-034		Yes	skin	invasive	1	97		6	6	6	GCF_005153305.1	0	reads	2283694	344837794	151	123	97.08	50	2743767	237996	32.71
SRR5250064	MMMOSAM:cfbd6c26-a6eb-4a2b-a39c-5d04f69b57f7	PRJNA369475	SAMN06327470	Young BC	2017	29256859	WHM-2017-01-034			skin	invasive	1	97		6	6	6	GCF_005153305.1	0	reads	1836598	277326298	151	99	96.96	37	2741948	301531	32.7
SRR5250546	MMMOSAM:6211279a-8c5f-4085-94db-e05413ed5d5a	PRJNA369475	SAMN06327952	Young BC	2017	29256859	WHM-2017-01-034			nose	colonising	0	97		0	0	0	GCF_005153305.1	0	reads	1917898	289602598	151	103	97.16	39	2742245	301531	32.7
SRR5250626	MMMOSAM:539ca94c-3509-4966-9bf5-8010658abf96	PRJNA369475	SAMN06328032	Young BC	2017	29256859	WHM-2017-01-034			nose	colonising	0	97		2	2	2	GCF_005153305.1	0	reads	2253042	340209342	151	121	96.79	40	2742411	301398	32.7
SRR5250664	MMMOSAM:49548927-17f9-41c2-8f10-daf77dccd792	PRJNA369475	SAMN06328070	Young BC	2017	29256859	WHM-2017-01-034			skin	invasive	1	97		6	6	6	GCF_005153305.1	0	reads	1566370	236521870	151	84	97.05	45	2742992	301223	32.7
SRR5250691	MMMOSAM:4399f1cc-f81b-4b9b-9e93-7c7d216a5e73	PRJNA369475	SAMN06328097	Young BC	2017	29256859	WHM-2017-01-034	Yes		nose	colonising	0	97					GCF_005153305.1	0	reads	2139812	323111612	151	115	96.71	43	2742756	240140	32.7
SRR5250737	MMMOSAM:39248fbb-292f-4a1c-8e31-3f17313ecf86	PRJNA369475	SAMN06328143	Young BC	2017	29256859	WHM-2017-01-034			nose	colonising	0	97		0	0	0	GCF_005153305.1	0	reads	1615600	243955600	151	87	97.09	42	2742574	301398	32.7
SRR5251342	MMMOSAM:1173c9b3-58f4-4acf-841a-f35439d8bc7f	PRJNA369475	SAMN06328712	Young BC	2017	29256859	WHM-2017-01-034			nose	colonising	0	97		0	0	0	GCF_005153305.1	0	reads	2699080	407561080	151	146	96.91	41	2742489	301356	32.7
SRR5249837	MMMOSAM:ff537640-2994-4a70-9d0c-a19ea8061df4	PRJNA369475	SAMN06327243	Young BC	2017	29256859	WHM-2017-01-035			bone	invasive	0	-		1	1	1	GCF_009912875.1	0	reads	2584776	390301176	151	139	97.37	53	2720996	290540	32.78
SRR5249878	MMMOSAM:f7046a7e-10d0-4695-b865-760daceab287	PRJNA369475	SAMN06327284	Young BC	2017	29256859	WHM-2017-01-035	Yes		nose	colonising	0	-					GCF_009912875.1	0	reads	2106766	318121666	151	114	97.24	61	2722870	260204	32.79
SRR5249882	MMMOSAM:f631292b-b77f-4cbc-9bc4-df0c8b910eb9	PRJNA369475	SAMN06327288	Young BC	2017	29256859	WHM-2017-01-035		Yes	bone	invasive	0	-		3	3	3	GCF_009912875.1	0	reads	1729632	261174432	151	93	97.31	58	2700859	290542	32.82
SRR5250010	MMMOSAM:da969691-878e-475d-9962-e6357cd68ca0	PRJNA369475	SAMN06327416	Young BC	2017	29256859	WHM-2017-01-035			nose	colonising	0	-		0	0	0	GCF_009912875.1	0	reads	2022676	305424076	151	109	97.34	59	2722793	290540	32.79
SRR5250019	MMMOSAM:d8b3882d-8ab0-42f9-ae8e-4f9bda272462	PRJNA369475	SAMN06327425	Young BC	2017	29256859	WHM-2017-01-035			nose	colonising	0	-		1	1	1	GCF_009912875.1	0	reads	2313432	349328232	151	125	97.21	57	2721336	290540	32.78
SRR5250128	MMMOSAM:c0e28197-887d-4c96-8cb4-3192c36ea130	PRJNA369475	SAMN06327534	Young BC	2017	29256859	WHM-2017-01-035			bone	invasive	0	-		2	2	2	GCF_009912875.1	0	reads	2484600	375174600	151	134	97.2	53	2700334	290540	32.82
SRR5250130	MMMOSAM:c0ae35f0-c953-4e71-8036-da8a7386d048	PRJNA369475	SAMN06327536	Young BC	2017	29256859	WHM-2017-01-035			bone	invasive	0	-		2	2	2	GCF_009912875.1	0	reads	2488134	375708234	151	134	97.3	55	2700560	290540	32.82
SRR5250290	MMMOSAM:9c93fb1b-1c3c-4ec2-b71f-c916c5d89e9d	PRJNA369475	SAMN06327696	Young BC	2017	29256859	WHM-2017-01-035			nose	colonising	0	-		0	0	0	GCF_009912875.1	0	reads	2115158	319388858	151	114	97.3	54	2721962	290540	32.78
SRR5250553	MMMOSAM:6137cfc4-3a05-4b77-8d80-27db10ddbaf7	PRJNA369475	SAMN06327959	Young BC	2017	29256859	WHM-2017-01-035			bone	invasive	0	-		3	3	3	GCF_009912875.1	0	reads	1665224	251448824	151	90	97.33	57	2700691	265008	32.82
SRR5250622	MMMOSAM:5419fc12-a125-49fd-bc32-bb0f79063f58	PRJNA369475	SAMN06328028	Young BC	2017	29256859	WHM-2017-01-035			nose	colonising	0	-		4	4	4	GCF_009912875.1	0	reads	2261638	341507338	151	122	97.25	50	2720856	290540	32.78
SRR5249944	MMMOSAM:e95055c3-2c0e-446f-8dfe-e2219f0d9f63	PRJNA369475	SAMN06327350	Young BC	2017	29256859	WHM-2017-01-036			nose	colonising	0	37		0	0	0	GCF_013467165.1	0	reads	1780698	268885398	151	96	93.24	66	2824665	174707	32.78
SRR5249956	MMMOSAM:e579bf76-9388-490d-939e-9e0a462e7035	PRJNA369475	SAMN06327362	Young BC	2017	29256859	WHM-2017-01-036			nose	colonising	0	37		0	0	0	GCF_013467165.1	0	reads	2314888	349548088	151	125	93.89	66	2824483	174707	32.77
SRR5249973	MMMOSAM:e2a67538-f71b-423a-90b7-2bf67039411d	PRJNA369475	SAMN06327379	Young BC	2017	29256859	WHM-2017-01-036			nose	colonising	0	37		1	1	1	GCF_013467165.1	0	reads	2287870	345468370	151	123	93.89	66	2824624	174593	32.77
SRR5250053	MMMOSAM:d1e52ee6-89ec-4bee-adf2-73272c33f635	PRJNA369475	SAMN06327459	Young BC	2017	29256859	WHM-2017-01-036			skin	invasive	3	37		0	0	0	GCF_013467165.1	0	reads	2371736	358132136	151	128	93.37	66	2824561	174707	32.77
SRR5250069	MMMOSAM:cf4421c2-198e-4a31-8aa1-af6079ade390	PRJNA369475	SAMN06327475	Young BC	2017	29256859	WHM-2017-01-036		Yes	skin	invasive	3	37		0	0	0	GCF_013467165.1	0	reads	2273256	343261656	151	123	93.73	66	2824449	174707	32.77
SRR5250261	MMMOSAM:a2718f44-d38b-4862-a21e-112d76511c7c	PRJNA369475	SAMN06327667	Young BC	2017	29256859	WHM-2017-01-036	Yes		nose	colonising	0	37					GCF_013467165.1	0	reads	1980530	299060030	151	107	94.1	66	2824437	174707	32.77
SRR5250275	MMMOSAM:9f6848ee-8663-459c-a8d2-95dc3267bac5	PRJNA369475	SAMN06327681	Young BC	2017	29256859	WHM-2017-01-036			skin	invasive	3	37		0	0	0	GCF_013467165.1	0	reads	2434922	367673222	151	131	93.35	69	2824960	174707	32.78
SRR5250298	MMMOSAM:9b38a3a4-3038-4539-a4a2-f64b2a5daac5	PRJNA369475	SAMN06327704	Young BC	2017	29256859	WHM-2017-01-036			skin	invasive	3	37		0	0	0	GCF_013467165.1	0	reads	2284678	344986378	151	123	94.07	63	2824424	174593	32.77
SRR5249917	MMMOSAM:efea00d8-5eb7-403c-a1d9-1548a44e6da3	PRJNA369475	SAMN06327323	Young BC	2017	29256859	WHM-2017-01-037	Yes		nose	colonising	0	59					GCF_004772055.1	0	reads	1594442	240760742	151	86	98.5	100	2676710	135685	32.78
SRR5250260	MMMOSAM:a28f1cff-e494-48b8-bb63-8e8dcec3edb3	PRJNA369475	SAMN06327666	Young BC	2017	29256859	WHM-2017-01-037			nose	colonising	0	59		8	8	7	GCF_004772055.1	0	reads	1920948	290063148	151	104	98.63	86	2675006	149273	32.77
SRR5250365	MMMOSAM:8984041a-db2c-4856-942a-2b1e0659c396	PRJNA369475	SAMN06327771	Young BC	2017	29256859	WHM-2017-01-037			nose	colonising	0	59		7	7	6	GCF_004772055.1	0	reads	2096636	316592036	151	113	98.47	87	2675249	127947	32.77
SRR5250368	MMMOSAM:88bd2001-d1d3-4fc0-9300-a762b36a85cb	PRJNA369475	SAMN06327774	Young BC	2017	29256859	WHM-2017-01-037			blood	invasive	-2	59		2	2	1	GCF_004772055.1	0	reads	1807756	272971156	151	97	98.49	74	2674186	135686	32.77
SRR5250596	MMMOSAM:583a7c6c-7fe4-4639-a11c-dfbbf797ff5c	PRJNA369475	SAMN06328002	Young BC	2017	29256859	WHM-2017-01-037		Yes	blood	invasive	-2	59		9	9	7	GCF_004772055.1	0	reads	1781106	268947006	151	96	98.71	80	2674560	149453	32.77
SRR5250644	MMMOSAM:4f6aa010-f1f5-418b-984a-b8bb79102af0	PRJNA369475	SAMN06328050	Young BC	2017	29256859	WHM-2017-01-037			nose	colonising	0	59		8	8	6	GCF_004772055.1	0	reads	2054440	310220440	151	111	98.67	78	2673875	146571	32.77
SRR5250762	MMMOSAM:328ff176-3912-4a11-aa0d-c85fc258f6e9	PRJNA369475	SAMN06328168	Young BC	2017	29256859	WHM-2017-01-037			nose	colonising	0	59		3	3	1	GCF_004772055.1	0	reads	2182328	329531528	151	118	98.48	97	2676159	146571	32.78
SRR5250814	MMMOSAM:2824439a-d81e-4aab-9fb1-a4cc51d05961	PRJNA369475	SAMN06328220	Young BC	2017	29256859	WHM-2017-01-037			blood	invasive	-2	59		8	8	7	GCF_004772055.1	0	reads	2468252	372706052	151	133	98.28	81	2674575	127903	32.78
SRR5249911	MMMOSAM:f13c878e-910d-4fef-a7bc-543b7c892657	PRJNA369475	SAMN06327317	Young BC	2017	29256859	WHM-2017-01-038			nose	colonising	0	15		0	0	0	GCF_001611405.1	0	reads	1700162	256724462	151	92	96.04	59	2767347	319806	32.76
SRR5250021	MMMOSAM:d847fcb1-d760-4fb9-ab98-af388eed2bf1	PRJNA369475	SAMN06327427	Young BC	2017	29256859	WHM-2017-01-038			nose	colonising	0	15		0	0	0	GCF_001611405.1	0	reads	1376822	207900122	151	74	95.6	55	2766838	319015	32.76
SRR5250109	MMMOSAM:c6e11f19-90fe-4680-a840-16e37349f21d	PRJNA369475	SAMN06327515	Young BC	2017	29256859	WHM-2017-01-038	Yes		nose	colonising	0	15					GCF_001611405.1	0	reads	2074568	313259768	151	112	95.56	64	2767585	249932	32.77
SRR5250152	MMMOSAM:bbae36a2-89c9-4f24-aab4-3294d6649caa	PRJNA369475	SAMN06327558	Young BC	2017	29256859	WHM-2017-01-038			blood	invasive	-6	15		1	1	1	GCF_001611405.1	0	reads	1847648	278994848	151	100	95.82	70	2768406	249932	32.77
SRR5250184	MMMOSAM:b32fa9ee-d507-431c-bdd8-a550af32b916	PRJNA369475	SAMN06327590	Young BC	2017	29256859	WHM-2017-01-038			blood	invasive	-6	15		1	1	1	GCF_001611405.1	0	reads	2134320	322282320	151	115	95.66	65	2767962	249932	32.76
SRR5250506	MMMOSAM:6a8f5569-e0d4-4e82-8539-968aca84eb18	PRJNA369475	SAMN06327912	Young BC	2017	29256859	WHM-2017-01-038			nose	colonising	0	15		0	0	0	GCF_001611405.1	0	reads	1999896	301984296	151	108	95.37	66	2767919	252191	32.77
SRR5250512	MMMOSAM:69af710f-b9e1-4157-ac1c-6a741ae358c9	PRJNA369475	SAMN06327918	Young BC	2017	29256859	WHM-2017-01-038			blood	invasive	-6	15		1	1	1	GCF_001611405.1	0	reads	1516882	229049182	151	82	95.58	73	2768850	243778	32.77
SRR5250587	MMMOSAM:5a401134-d523-462f-a715-6522e69d9ee0	PRJNA369475	SAMN06327993	Young BC	2017	29256859	WHM-2017-01-038			nose	colonising	0	15		0	0	0	GCF_001611405.1	0	reads	2185792	330054592	151	118	95.08	58	2767205	252142	32.76
SRR5250675	MMMOSAM:46e3888c-bd71-469e-84eb-c83721a4b710	PRJNA369475	SAMN06328081	Young BC	2017	29256859	WHM-2017-01-038		Yes	blood	invasive	-6	15		1	1	1	GCF_001611405.1	0	reads	2363818	356936518	151	127	95.58	59	2767480	249932	32.76
SRR5251322	MMMOSAM:1829f657-91f6-4175-98f1-57a3c7b37e26	PRJNA369475	SAMN06328692	Young BC	2017	29256859	WHM-2017-01-038			blood	invasive	-6	15		1	1	1	GCF_001611405.1	0	reads	2112768	319027968	151	114	95.29	61	2767443	251810	32.77
SRR5249836	MMMOSAM:ff66fdff-938a-43ce-8694-a525caee960f	PRJNA369475	SAMN06327242	Young BC	2017	29256859	WHM-2017-01-039	Yes		nose	colonising	0	8					GCF_009912915.1	0	reads	1980264	299019864	151	107	96.73	32	2738456	982220	32.66
SRR5250464	MMMOSAM:74a60959-8cfc-4ab7-bccd-3e5843309da3	PRJNA369475	SAMN06327870	Young BC	2017	29256859	WHM-2017-01-039			nose	colonising	0	8		0	0	0	GCF_009912915.1	0	reads	2075574	313411674	151	112	96.74	47	2739864	982220	32.66
SRR5250497	MMMOSAM:6c797308-e297-4a6a-896d-482c7052d34b	PRJNA369475	SAMN06327903	Young BC	2017	29256859	WHM-2017-01-039			nose	colonising	0	8		0	0	0	GCF_009912915.1	0	reads	1611966	243406866	151	87	96.95	34	2737836	715550	32.66
SRR5250598	MMMOSAM:57db7c85-4544-4856-92d9-c8b99fc88dc6	PRJNA369475	SAMN06328004	Young BC	2017	29256859	WHM-2017-01-039			nose	colonising	0	8		0	0	0	GCF_009912915.1	0	reads	1633944	246725544	151	88	96.45	48	2740256	454248	32.67
SRR5251277	MMMOSAM:1ed60f64-0788-45de-a8fa-6fdd1cb32e24	PRJNA369475	SAMN06328647	Young BC	2017	29256859	WHM-2017-01-039			nose	colonising	0	8		0	0	0	GCF_009912915.1	0	reads	1760478	265832178	151	95	96.86	29	2738525	982220	32.66
SRR5249845	MMMOSAM:fe22ae8b-85db-4280-8a49-5d3211722ca1	PRJNA369475	SAMN06327251	Young BC	2017	29256859	WHM-2017-01-040			nose	colonising	0	3434		67	67	66	GCF_900620215.1	0	reads	1515934	228906034	151	82	96.67	41	2746146	313943	32.69
SRR5249879	MMMOSAM:f69ff2b4-06e1-4675-832c-94ae02d39d4d	PRJNA369475	SAMN06327285	Young BC	2017	29256859	WHM-2017-01-040			nose	colonising	0	3434		2	2	2	GCF_900620215.1	0	reads	1513570	228549070	151	81	96.52	35	2739958	368154	32.68
SRR5250346	MMMOSAM:8f762930-cba0-48bf-8cde-8808729f033e	PRJNA369475	SAMN06327752	Young BC	2017	29256859	WHM-2017-01-040	Yes		nose	colonising	0	3434					GCF_900620215.1	0	reads	1716886	259249786	151	92	96.37	40	2740623	313948	32.69
SRR5250574	MMMOSAM:5d45d8ec-9144-4fc1-9b3c-3cb294c98cbd	PRJNA369475	SAMN06327980	Young BC	2017	29256859	WHM-2017-01-040			nose	colonising	0	3434		65	65	65	GCF_900620215.1	0	reads	1888670	285189170	151	102	96.9	46	2746783	323661	32.69
SRR5250630	MMMOSAM:53078790-4747-4572-a212-94b9331f6d98	PRJNA369475	SAMN06328036	Young BC	2017	29256859	WHM-2017-01-040			blood	invasive	-2	3434		10	10	10	GCF_900620215.1	0	reads	1866130	281785630	151	101	97.25	36	2736766	730723	32.68
SRR5250635	MMMOSAM:516b085e-f997-463c-8ed7-2c3fd2739ea6	PRJNA369475	SAMN06328041	Young BC	2017	29256859	WHM-2017-01-040			blood	invasive	-2	3434		9	9	9	GCF_900620215.1	0	reads	1611252	243299052	151	87	97.06	26	2735494	730673	32.68
SRR5250642	MMMOSAM:5007c472-e4ee-4ecf-8134-9445305b6906	PRJNA369475	SAMN06328048	Young BC	2017	29256859	WHM-2017-01-040			blood	invasive	-2	3434		9	9	9	GCF_900620215.1	0	reads	1780036	268785436	151	96	97.44	26	2735502	730723	32.68
SRR5250687	MMMOSAM:44b5fe24-d235-4b14-b168-454b80993cd9	PRJNA369475	SAMN06328093	Young BC	2017	29256859	WHM-2017-01-040			nose	colonising	0	3434		2	2	2	GCF_900620215.1	0	reads	2121964	320416564	151	114	96.54	35	2739833	380232	32.68
SRR5250717	MMMOSAM:3dbf256d-c3f7-4832-8ed1-8f25452188f9	PRJNA369475	SAMN06328123	Young BC	2017	29256859	WHM-2017-01-040		Yes	blood	invasive	-2	3434		10	10	10	GCF_900620215.1	0	reads	1895682	286247982	151	102	97.07	33	2736577	368154	32.68
SRR5250812	MMMOSAM:28c34cd9-5c14-425e-8300-e45ddd040d63	PRJNA369475	SAMN06328218	Young BC	2017	29256859	WHM-2017-01-040			blood	invasive	-2	3434		10	10	10	GCF_900620215.1	0	reads	1776158	268199858	151	96	96.78	41	2737604	316529	32.69
SRR5249981	MMMOSAM:e0cf6a57-5158-4f0e-a965-8eb73e1b5190	PRJNA369475	SAMN06327387	Young BC	2017	29256859	WHM-2017-01-041			blood	invasive	7	15		5	5	5	GCF_001611325.1	0	reads	1761858	266040558	151	95	97.09	63	2723865	436476	32.74
SRR5250015	MMMOSAM:d922c58c-d410-4373-98a4-80a916d1da92	PRJNA369475	SAMN06327421	Young BC	2017	29256859	WHM-2017-01-041			nose	colonising	0	15		1	1	0	GCF_001611325.1	0	reads	1591850	240369350	151	86	97.51	68	2723472	249931	32.74
SRR5250284	MMMOSAM:9e0c40d8-d1cf-4905-9984-0a15db26004e	PRJNA369475	SAMN06327690	Young BC	2017	29256859	WHM-2017-01-041			blood	invasive	7	15		5	5	5	GCF_001611325.1	0	reads	1857734	280517834	151	100	96.94	76	2724782	243884	32.74
SRR5250324	MMMOSAM:9608930f-899e-4684-96ee-803b214fa400	PRJNA369475	SAMN06327730	Young BC	2017	29256859	WHM-2017-01-041			blood	invasive	7	15		6	6	5	GCF_001611325.1	0	reads	1938342	292689642	151	104	97.12	75	2724231	245143	32.74
SRR5250442	MMMOSAM:76d74f2e-093d-4e27-9183-a45078aa4a57	PRJNA369475	SAMN06327848	Young BC	2017	29256859	WHM-2017-01-041		Yes	blood	invasive	7	15		6	6	5	GCF_001611325.1	0	reads	1788506	270064406	151	96	97.39	62	2722682	249933	32.74
SRR5250526	MMMOSAM:670cd4bb-2220-499f-a77c-c815e889f7a9	PRJNA369475	SAMN06327932	Young BC	2017	29256859	WHM-2017-01-041			blood	invasive	7	15		5	5	5	GCF_001611325.1	0	reads	1925250	290712750	151	104	97.02	60	2723461	245143	32.74
SRR5250749	MMMOSAM:359f7f8b-c4ef-48ad-ad53-834b652c1522	PRJNA369475	SAMN06328155	Young BC	2017	29256859	WHM-2017-01-041			nose	colonising	0	15		3	3	2	GCF_001611325.1	0	reads	1447188	218525388	151	78	97.4	62	2723304	249933	32.74
SRR5251394	MMMOSAM:053aaacc-050e-4890-b59a-d21b0aea4de6	PRJNA369475	SAMN06328764	Young BC	2017	29256859	WHM-2017-01-041	Yes		nose	colonising	0	15					GCF_001611325.1	0	reads	1538052	232245852	151	83	97.09	76	2724896	249933	32.74
SRR5249941	MMMOSAM:ea2b2486-e09c-4394-8d06-cdfe0fa7d472	PRJNA369475	SAMN06327347	Young BC	2017	29256859	WHM-2017-01-042			blood	invasive	-2	59		10	10	10	GCF_009912335.1	0	reads	1962436	296327836	151	106	96.89	87	2750949	153948	32.74
SRR5250043	MMMOSAM:d35db9eb-6ba2-4c8e-b72c-e823c7a8da32	PRJNA369475	SAMN06327449	Young BC	2017	29256859	WHM-2017-01-042		Yes	blood	invasive	-2	59		10	10	10	GCF_009912335.1	0	reads	1655924	250044524	151	89	97.26	87	2750829	153632	32.74
SRR5250189	MMMOSAM:b2421484-4448-4ea1-8e06-b724a6a5bd8b	PRJNA369475	SAMN06327595	Young BC	2017	29256859	WHM-2017-01-042			blood	invasive	-2	59		10	10	10	GCF_009912335.1	0	reads	1774538	267955238	151	96	96.91	76	2749794	170618	32.73
SRR5250341	MMMOSAM:91907bee-47a8-43a9-96a9-3fd398cf3122	PRJNA369475	SAMN06327747	Young BC	2017	29256859	WHM-2017-01-042			nose	colonising	0	59		1	1	0	GCF_009912335.1	0	reads	1959194	295838294	151	106	96.77	83	2750373	153948	32.74
SRR5250657	MMMOSAM:4c25aa41-9592-49f4-a91d-9fc8bc249c7e	PRJNA369475	SAMN06328063	Young BC	2017	29256859	WHM-2017-01-042			blood	invasive	-2	59		10	10	10	GCF_009912335.1	0	reads	1442644	217839244	151	78	97.35	89	2751496	153632	32.74
SRR5250670	MMMOSAM:47b66a78-1315-4bfb-affd-778a756e8956	PRJNA369475	SAMN06328076	Young BC	2017	29256859	WHM-2017-01-042	Yes		nose	colonising	0	59					GCF_009912335.1	0	reads	1544572	233230372	151	83	97.3	85	2750519	153632	32.74
SRR5251255	MMMOSAM:2275a825-36b1-42a2-8755-d03c8d8307b7	PRJNA369475	SAMN06328625	Young BC	2017	29256859	WHM-2017-01-042			nose	colonising	0	59		9	9	8	GCF_009912335.1	0	reads	1899662	286848962	151	102	97.39	79	2749975	264247	32.73
SRR5251300	MMMOSAM:1b66167c-1958-4a2c-a4bb-0358ecdbbb5a	PRJNA369475	SAMN06328670	Young BC	2017	29256859	WHM-2017-01-042			nose	colonising	0	59		2	2	1	GCF_009912335.1	0	reads	1752292	264596092	151	94	97.28	73	2749122	153632	32.73
SRR5251307	MMMOSAM:1a748e94-9df5-4fc4-821d-7daf17f90fcc	PRJNA369475	SAMN06328677	Young BC	2017	29256859	WHM-2017-01-042			blood	invasive	-2	59		10	10	10	GCF_009912335.1	0	reads	1710712	258317512	151	92	97.33	84	2750261	153632	32.73
SRR5249867	MMMOSAM:f972a26d-2595-4061-9c61-345328ee2658	PRJNA369475	SAMN06327273	Young BC	2017	29256859	WHM-2017-01-043			blood	invasive	-6	30		1	1	1	GCF_009912835.1	0	reads	1948720	294256720	151	105	93.59	58	2847157	182162	32.76
SRR5250234	MMMOSAM:a86d850d-9d4f-4965-8631-4303aa3de674	PRJNA369475	SAMN06327640	Young BC	2017	29256859	WHM-2017-01-043			blood	invasive	-6	30		2	2	2	GCF_009912835.1	0	reads	1672838	252598538	151	90	94.3	59	2846767	181697	32.76
SRR5250282	MMMOSAM:9ea82efb-75c0-4a23-a86f-3361ce9b4f44	PRJNA369475	SAMN06327688	Young BC	2017	29256859	WHM-2017-01-043			nose	colonising	0	30		1	1	1	GCF_009912835.1	0	reads	1830468	276400668	151	99	94.09	57	2846759	182162	32.76
SRR5250302	MMMOSAM:9ad9ca26-1147-4249-930c-22437a4d0c40	PRJNA369475	SAMN06327708	Young BC	2017	29256859	WHM-2017-01-043			blood	invasive	-6	30		1	1	1	GCF_009912835.1	0	reads	1507470	227627970	151	81	93.89	62	2847375	182162	32.76
SRR5250479	MMMOSAM:70eaca46-e89c-4147-8e79-c618f89c8c17	PRJNA369475	SAMN06327885	Young BC	2017	29256859	WHM-2017-01-043		Yes	blood	invasive	-6	30		1	1	1	GCF_009912835.1	0	reads	1488868	224819068	151	80	94.37	57	2846562	182162	32.76
SRR5250681	MMMOSAM:4650b5b2-01f5-40be-a888-1923526d653d	PRJNA369475	SAMN06328087	Young BC	2017	29256859	WHM-2017-01-043			nose	colonising	0	30		0	0	0	GCF_009912835.1	0	reads	1891884	285674484	151	102	93.99	60	2847035	182162	32.76
SRR5250684	MMMOSAM:45fd158c-ad5d-4965-93b2-9a6f82e6d888	PRJNA369475	SAMN06328090	Young BC	2017	29256859	WHM-2017-01-043			blood	invasive	-6	30		1	1	1	GCF_009912835.1	0	reads	1740810	262862310	151	94	93.76	58	2846728	171248	32.76
SRR5251270	MMMOSAM:2059b26d-569c-4011-bfe0-ba4732e4d05f	PRJNA369475	SAMN06328640	Young BC	2017	29256859	WHM-2017-01-043			nose	colonising	0	30		0	0	0	GCF_009912835.1	0	reads	1716194	259145294	151	92	93.56	62	2847447	182162	32.76
SRR5251354	MMMOSAM:0ff04507-24f5-4e53-a955-7580a50dc71b	PRJNA369475	SAMN06328724	Young BC	2017	29256859	WHM-2017-01-043	Yes		nose	colonising	0	30					GCF_009912835.1	0	reads	1548004	233748604	151	83	93.99	63	2847625	182162	32.76
SRR5249874	MMMOSAM:f7e2a53f-af3e-4165-b660-112eabb35267	PRJNA369475	SAMN06327280	Young BC	2017	29256859	WHM-2017-01-044			nose	colonising	0	22	Yes	2	0	0	GCF_900635905.1	0	reads	2045686	308898586	151	110	93.2	181	2868743	135809	32.78
SRR5249894	MMMOSAM:f45edf93-fb36-407a-8a21-4d3ef37e7ce5	PRJNA369475	SAMN06327300	Young BC	2017	29256859	WHM-2017-01-044		Yes	blood	invasive	0	22	Yes	3	1	0	GCF_900635905.1	0	reads	3518946	531360846	151	190	93.62	161	2867333	131811	32.78
SRR5249931	MMMOSAM:edf6f104-b4f6-4021-95ac-e15a5f3fab17	PRJNA369475	SAMN06327337	Young BC	2017	29256859	WHM-2017-01-044			blood	invasive	0	22	Yes	3	1	0	GCF_900635905.1	0	reads	3094576	467280976	151	167	93.79	145	2865633	146381	32.77
SRR5249935	MMMOSAM:ecd2e226-dcaf-4306-8600-2ef930a991d9	PRJNA369475	SAMN06327341	Young BC	2017	29256859	WHM-2017-01-044			blood	invasive	0	22	Yes	2	0	0	GCF_900635905.1	0	reads	2937968	443633168	151	159	93.7	146	2865652	146381	32.77
SRR5249997	MMMOSAM:dc9a5f15-39b7-4a7f-b662-a576d8d6b5fd	PRJNA369475	SAMN06327403	Young BC	2017	29256859	WHM-2017-01-044			blood	invasive	0	22	Yes	3	1	0	GCF_900635905.1	0	reads	3280256	495318656	151	177	93.85	150	2866083	135809	32.77
SRR5250194	MMMOSAM:b07387a7-29fa-45c5-80d4-d8693383e0e7	PRJNA369475	SAMN06327600	Young BC	2017	29256859	WHM-2017-01-044			nose	colonising	0	22	Yes	2	1	0	GCF_900635905.1	0	reads	1725902	260611202	151	93	93.5	165	2867195	150807	32.77
SRR5250271	MMMOSAM:a06cc0a0-9052-4808-af1f-1359616e8282	PRJNA369475	SAMN06327677	Young BC	2017	29256859	WHM-2017-01-044			nose	colonising	0	22	Yes	1	0	0	GCF_900635905.1	0	reads	1555670	234906170	151	84	93.59	169	2867458	135809	32.78
SRR5250273	MMMOSAM:9fdcbabe-32a0-4e58-8134-1fc5d8c5e3eb	PRJNA369475	SAMN06327679	Young BC	2017	29256859	WHM-2017-01-044	Yes		nose	colonising	0	22	Yes				GCF_900635905.1	0	reads	2012750	303925250	151	108	93.36	173	2868157	135809	32.78
SRR5250788	MMMOSAM:2e022de3-6768-4950-9027-d8f63caa56eb	PRJNA369475	SAMN06328194	Young BC	2017	29256859	WHM-2017-01-044			blood	invasive	0	22	Yes	3	1	0	GCF_900635905.1	0	reads	3238186	488966086	151	175	93.72	156	2866502	125475	32.77
SRR5251378	MMMOSAM:0b72cc32-c567-4c12-8b45-ff5e965c5de9	PRJNA369475	SAMN06328748	Young BC	2017	29256859	WHM-2017-01-044			nose	colonising	0	22	Yes	1	0	0	GCF_900635905.1	0	reads	1650450	249217950	151	89	93.66	167	2868331	146381	32.78
SRR5249889	MMMOSAM:f51d4534-00d0-42ff-b232-f19b279e6c98	PRJNA369475	SAMN06327295	Young BC	2017	29256859	WHM-2017-01-045	Yes		nose	colonising	0	25					GCF_009913035.1	0	reads	3446730	520456230	151	186	96.97	31	2740072	566615	32.68
SRR5249927	MMMOSAM:ee76efd2-51d7-450a-8891-0d68fe42513a	PRJNA369475	SAMN06327333	Young BC	2017	29256859	WHM-2017-01-045		Yes	blood	invasive	-1	25		1	1	1	GCF_009913035.1	0	reads	3253180	491230180	151	176	96.92	33	2740381	566615	32.68
SRR5249938	MMMOSAM:ec24b95d-5e9b-4854-aa8c-491c87d40bae	PRJNA369475	SAMN06327344	Young BC	2017	29256859	WHM-2017-01-045			blood	invasive	-1	25		1	1	1	GCF_009913035.1	0	reads	2329386	351737286	151	126	97.13	32	2740707	614900	32.68
SRR5250090	MMMOSAM:ca7d36fb-9083-4480-b43f-a7e2cb55064b	PRJNA369475	SAMN06327496	Young BC	2017	29256859	WHM-2017-01-045			blood	invasive	-1	25		1	1	1	GCF_009913035.1	0	reads	2958288	446701488	151	160	96.59	35	2740696	566615	32.68
SRR5250170	MMMOSAM:b740b8ef-008d-4a43-b68d-9935461eca06	PRJNA369475	SAMN06327576	Young BC	2017	29256859	WHM-2017-01-045			blood	invasive	-1	25		1	1	1	GCF_009913035.1	0	reads	2904934	438645034	151	157	96.95	35	2740654	566615	32.68
SRR5250222	MMMOSAM:aad1f666-1e91-4672-93ba-133e8180f796	PRJNA369475	SAMN06327628	Young BC	2017	29256859	WHM-2017-01-045			blood	invasive	-1	25		1	1	1	GCF_009913035.1	0	reads	2940404	444001004	151	159	96.88	36	2740702	566615	32.68
SRR5250766	MMMOSAM:314ea0db-1b62-4425-8e37-aeeb35a193fc	PRJNA369475	SAMN06328172	Young BC	2017	29256859	WHM-2017-01-045			nose	colonising	0	25		0	0	0	GCF_009913035.1	0	reads	2836904	428372504	151	153	96.89	36	2740666	566615	32.68
SRR5251257	MMMOSAM:224cb067-ca72-4976-9755-549d97d1f8d6	PRJNA369475	SAMN06328627	Young BC	2017	29256859	WHM-2017-01-045			nose	colonising	0	25		0	0	0	GCF_009913035.1	0	reads	2586396	390545796	151	140	96.9	33	2740432	566615	32.68
SRR5250023	MMMOSAM:d782bd14-90f0-46d4-af7c-5dbd3e93eb3a	PRJNA369475	SAMN06327429	Young BC	2017	29256859	WHM-2017-01-046			nose	colonising	0	1		1	1	1	GCF_002356655.1	0	reads	2644794	399363894	151	143	97.48	41	2758000	738218	32.68
SRR5250068	MMMOSAM:cf4e995a-cc43-4bf4-ba71-3c43cc76d02f	PRJNA369475	SAMN06327474	Young BC	2017	29256859	WHM-2017-01-046	Yes		nose	colonising	0	1					GCF_002356655.1	0	reads	2948982	445296282	151	159	97.57	32	2756972	738038	32.68
SRR5250352	MMMOSAM:8d2b5c2f-1ab7-4e9f-8aaf-0ddb32581386	PRJNA369475	SAMN06327758	Young BC	2017	29256859	WHM-2017-01-046			nose	colonising	0	1		0	0	0	GCF_002356655.1	0	reads	3704144	559325744	151	200	97.48	33	2756991	737377	32.68
SRR5250529	MMMOSAM:665ac615-b031-470e-b9b9-23e63011ba67	PRJNA369475	SAMN06327935	Young BC	2017	29256859	WHM-2017-01-046			nose	colonising	0	1		0	0	0	GCF_002356655.1	0	reads	3527374	532633474	151	190	97.49	38	2757762	738221	32.68
SRR5250686	MMMOSAM:44c0632c-0c8d-40c6-81e7-4ad5cf368519	PRJNA369475	SAMN06328092	Young BC	2017	29256859	WHM-2017-01-046			nose	colonising	0	1		0	0	0	GCF_002356655.1	0	reads	3532846	533459746	151	191	97.54	37	2757356	737377	32.68
SRR5249934	MMMOSAM:ecd31d6e-83dd-4a85-a54b-38a73cef24e5	PRJNA369475	SAMN06327340	Young BC	2017	29256859	WHM-2017-01-047			blood	invasive	0	398		0	0	0	GCF_005931035.2	0	reads	2889502	436314802	151	156	95.38	61	2727798	307395	32.87
SRR5250082	MMMOSAM:cc18d3e0-2dd5-419f-a5cf-14a22010bef4	PRJNA369475	SAMN06327488	Young BC	2017	29256859	WHM-2017-01-047			nose	colonising	0	398		0	0	0	GCF_005931035.2	0	reads	2286264	345225864	151	123	95.92	63	2728429	307383	32.87
SRR5250104	MMMOSAM:c79dd78e-e84d-4f94-8a76-d9207b24ea70	PRJNA369475	SAMN06327510	Young BC	2017	29256859	WHM-2017-01-047			blood	invasive	0	398		0	0	0	GCF_005931035.2	0	reads	3172814	479094914	151	171	95.62	59	2727711	410468	32.87
SRR5250476	MMMOSAM:7170dec1-0869-44ca-afc9-cf928d92e71a	PRJNA369475	SAMN06327882	Young BC	2017	29256859	WHM-2017-01-047			blood	invasive	0	398		0	0	0	GCF_005931035.2	0	reads	2966996	448016396	151	160	95.62	66	2728942	410468	32.87
SRR5250504	MMMOSAM:6b662626-ecf7-4401-8a0d-4bb572fcfd92	PRJNA369475	SAMN06327910	Young BC	2017	29256859	WHM-2017-01-047		Yes	blood	invasive	0	398		0	0	0	GCF_005931035.2	0	reads	2674138	403794838	151	144	95.82	62	2728326	388307	32.87
SRR5250624	MMMOSAM:53cc2096-fe77-45dc-be55-7512b0294707	PRJNA369475	SAMN06328030	Young BC	2017	29256859	WHM-2017-01-047			nose	colonising	0	398		0	0	0	GCF_005931035.2	0	reads	2828530	427108030	151	153	95.7	58	2727752	410468	32.87
SRR5250671	MMMOSAM:475dc85a-4c92-405f-8bb0-da15bd89fa52	PRJNA369475	SAMN06328077	Young BC	2017	29256859	WHM-2017-01-047	Yes		nose	colonising	0	398					GCF_005931035.2	0	reads	2317730	349977230	151	125	95.83	65	2728651	410468	32.87
SRR5250701	MMMOSAM:409b8044-b06e-41c0-be92-52f335a85885	PRJNA369475	SAMN06328107	Young BC	2017	29256859	WHM-2017-01-047			blood	invasive	0	398		0	0	0	GCF_005931035.2	0	reads	3269920	493757920	151	177	95.38	66	2728742	335557	32.87
SRR5251302	MMMOSAM:1b06baf3-a85b-428f-8a0a-4b002156652c	PRJNA369475	SAMN06328672	Young BC	2017	29256859	WHM-2017-01-047			nose	colonising	0	398		1	1	1	GCF_005931035.2	0	reads	3178862	480008162	151	172	95.49	58	2727474	410468	32.87
SRR5251382	MMMOSAM:0a6646d4-f2d1-474d-ab7a-32145278c781	PRJNA369475	SAMN06328752	Young BC	2017	29256859	WHM-2017-01-047			nose	colonising	0	398		0	0	0	GCF_005931035.2	0	reads	2767746	417929646	151	149	95.84	59	2727738	410468	32.87
SRR5250035	MMMOSAM:d4e5a736-e962-419a-baa8-753fce6ccd3b	PRJNA369475	SAMN06327441	Young BC	2017	29256859	WHM-2017-01-048			nose	colonising	0	8		8	8	8	GCF_004193895.1	0	reads	1897998	286597698	151	102	96.2	74	2806880	704974	32.66
SRR5250169	MMMOSAM:b78e2807-f831-4498-ae0e-aee5f64a1208	PRJNA369475	SAMN06327575	Young BC	2017	29256859	WHM-2017-01-048		Yes	blood	invasive	4	8		71	71	70	GCF_004193895.1	0	reads	2478240	374214240	151	134	96.56	80	2782875	874566	32.63
SRR5250207	MMMOSAM:adef7094-19b2-4d4d-b9b5-f64c34283830	PRJNA369475	SAMN06327613	Young BC	2017	29256859	WHM-2017-01-048	Yes		nose	colonising	0	8					GCF_004193895.1	0	reads	2983514	450510614	151	161	96.14	63	2805457	894721	32.66
SRR5250489	MMMOSAM:6eb2aefe-b76e-4d47-8140-584b9632f016	PRJNA369475	SAMN06327895	Young BC	2017	29256859	WHM-2017-01-048			blood	invasive	4	8		71	71	70	GCF_004193895.1	0	reads	2929042	442285342	151	158	96.31	72	2782536	843733	32.63
SRR5250575	MMMOSAM:5d45a9dc-164c-4c00-88b0-0c00e7c47a3b	PRJNA369475	SAMN06327981	Young BC	2017	29256859	WHM-2017-01-048			blood	invasive	4	8		70	70	69	GCF_004193895.1	0	reads	3074454	464242554	151	166	96.23	77	2783574	843866	32.63
SRR5250629	MMMOSAM:532722e9-e01d-45bc-845a-5d46123c4888	PRJNA369475	SAMN06328035	Young BC	2017	29256859	WHM-2017-01-048			nose	colonising	0	8		10	10	10	GCF_004193895.1	0	reads	2988202	451218502	151	161	96.07	66	2806378	843735	32.66
SRR5250793	MMMOSAM:2d568d7e-c7dc-4869-80dc-782377d3c0c6	PRJNA369475	SAMN06328199	Young BC	2017	29256859	WHM-2017-01-048			blood	invasive	4	8		71	71	70	GCF_004193895.1	0	reads	2874166	433999066	151	155	96.37	74	2783142	942982	32.63
SRR5251346	MMMOSAM:110e729d-b6b1-4c74-9bc2-5e94ed2832a7	PRJNA369475	SAMN06328716	Young BC	2017	29256859	WHM-2017-01-048			blood	invasive	4	8		71	71	70	GCF_004193895.1	0	reads	2392116	361209516	151	129	96.48	78	2783517	671547	32.63
SRR5250062	MMMOSAM:d05f373d-be12-4186-85f8-aca9707663c4	PRJNA369475	SAMN06327468	Young BC	2017	29256859	WHM-2017-01-049			nose	colonising	0	30		1	1	0	GCF_009912675.1	0	reads	2963672	447514472	151	160	96.01	77	2769345	124396	32.7
SRR5250119	MMMOSAM:c4910c3c-2a3c-49bf-98ac-53ad6430b9c2	PRJNA369475	SAMN06327525	Young BC	2017	29256859	WHM-2017-01-049			blood	invasive	-3	30		5	5	4	GCF_009912675.1	0	reads	2823572	426359372	151	152	96.04	74	2768903	150397	32.7
SRR5250232	MMMOSAM:a88aad7c-f80f-4685-9662-1f2ac8e28515	PRJNA369475	SAMN06327638	Young BC	2017	29256859	WHM-2017-01-049		Yes	blood	invasive	-3	30		5	5	4	GCF_009912675.1	0	reads	2905272	438696072	151	157	96	65	2767796	150397	32.7
SRR5250259	MMMOSAM:a3069d77-f47b-4ad3-b910-56d23707fa4b	PRJNA369475	SAMN06327665	Young BC	2017	29256859	WHM-2017-01-049			blood	invasive	-3	30		6	6	5	GCF_009912675.1	0	reads	2783402	420293702	151	150	96.01	74	2768982	150397	32.7
SRR5250402	MMMOSAM:7fd35b0b-b99f-43bc-9f77-506a88eb5d12	PRJNA369475	SAMN06327808	Young BC	2017	29256859	WHM-2017-01-049			nose	colonising	0	30		6	6	5	GCF_009912675.1	0	reads	2823540	426354540	151	152	95.96	72	2768794	150397	32.7
SRR5250608	MMMOSAM:56d4f30d-23ff-4a64-a463-5b863fb4c9f5	PRJNA369475	SAMN06328014	Young BC	2017	29256859	WHM-2017-01-049			blood	invasive	-3	30		5	5	4	GCF_009912675.1	0	reads	2884130	435503630	151	156	96.26	80	2769465	150859	32.7
SRR5251319	MMMOSAM:18ba858c-5616-493d-8aa4-607e79dff3e7	PRJNA369475	SAMN06328689	Young BC	2017	29256859	WHM-2017-01-049			blood	invasive	-3	30		5	5	4	GCF_009912675.1	0	reads	2795264	422084864	151	151	96.04	68	2768350	150397	32.7
SRR5251396	MMMOSAM:04b28612-98f3-4bf4-99ce-9521f231dd83	PRJNA369475	SAMN06328766	Young BC	2017	29256859	WHM-2017-01-049	Yes		nose	colonising	0	30					GCF_009912675.1	0	reads	2800466	422870366	151	151	95.91	83	2770154	150397	32.7
SRR5249942	MMMOSAM:e9a06a8c-c76e-4449-9fb2-c89a682a4716	PRJNA369475	SAMN06327348	Young BC	2017	29256859	WHM-2017-01-050			nose	colonising	0	30		3	2	1	GCF_002633785.1	0	reads	2973476	448994876	151	161	94.87	66	2800686	167480	32.74
SRR5249946	MMMOSAM:e8bcd33f-8cad-4f75-9ca1-0de4e06c44df	PRJNA369475	SAMN06327352	Young BC	2017	29256859	WHM-2017-01-050			blood	invasive	0	30		3	3	3	GCF_002633785.1	0	reads	3502022	528805322	151	189	95.43	59	2799412	167293	32.74
SRR5249977	MMMOSAM:e19e4532-415f-4c52-923a-05a721dfb947	PRJNA369475	SAMN06327383	Young BC	2017	29256859	WHM-2017-01-050			nose	colonising	0	30		6	5	4	GCF_002633785.1	0	reads	2814414	424976514	151	152	95.07	64	2799861	159810	32.74
SRR5250101	MMMOSAM:c880161d-a30f-49d8-a1fa-8b2a93abb10b	PRJNA369475	SAMN06327507	Young BC	2017	29256859	WHM-2017-01-050			blood	invasive	0	30		4	3	2	GCF_002633785.1	0	reads	2854800	431074800	151	154	95.29	58	2799065	159810	32.74
SRR5250582	MMMOSAM:5bd89a2c-9ed3-436b-89df-02ac5c714564	PRJNA369475	SAMN06327988	Young BC	2017	29256859	WHM-2017-01-050	Yes		nose	colonising	0	30					GCF_002633785.1	0	reads	2753406	415764306	151	149	95.33	61	2799553	159810	32.74
SRR5250825	MMMOSAM:2484b9a7-ac18-4d1b-bfeb-6abd68193e59	PRJNA369475	SAMN06328231	Young BC	2017	29256859	WHM-2017-01-050		Yes	blood	invasive	0	30		4	3	2	GCF_002633785.1	0	reads	2881832	435156632	151	156	95.32	65	2799986	159810	32.74
SRR5251251	MMMOSAM:237a573f-98b4-4399-b592-2e64fcc8cefe	PRJNA369475	SAMN06328238	Young BC	2017	29256859	WHM-2017-01-050			blood	invasive	0	30		3	3	3	GCF_002633785.1	0	reads	2358238	356093938	151	127	95.51	59	2799620	167293	32.74
SRR5251367	MMMOSAM:0de470a2-04a0-4eae-af6e-03586046c035	PRJNA369475	SAMN06328737	Young BC	2017	29256859	WHM-2017-01-050			blood	invasive	0	30		6	5	3	GCF_002633785.1	0	reads	2946662	444945962	151	159	95.07	64	2800262	167480	32.74
SRR5251414	MMMOSAM:011f1bf8-4a16-45d2-a6b5-80874855ed5a	PRJNA369475	SAMN06328784	Young BC	2017	29256859	WHM-2017-01-050			nose	colonising	0	30		5	4	3	GCF_002633785.1	0	reads	3006950	454049450	151	162	95.27	61	2799769	167493	32.74
SRR5249903	MMMOSAM:f2ae2f21-4e5f-464e-a435-5047e74a5d3b	PRJNA369475	SAMN06327309	Young BC	2017	29256859	WHM-2017-01-051			blood	invasive	-2	45		1	1	1	GCF_009912875.1	0	reads	2521486	380744386	151	136	97.35	55	2728989	420082	32.77
SRR5249913	MMMOSAM:f1013e11-c93f-4aa7-b6d7-da0a357580bd	PRJNA369475	SAMN06327319	Young BC	2017	29256859	WHM-2017-01-051			nose	colonising	0	45		0	0	0	GCF_009912875.1	0	reads	1836044	277242644	151	99	97.05	49	2740255	618808	32.74
SRR5250110	MMMOSAM:c6d93779-ad86-4b59-9415-d7156d23944a	PRJNA369475	SAMN06327516	Young BC	2017	29256859	WHM-2017-01-051		Yes	blood	invasive	-2	45		1	1	1	GCF_009912875.1	0	reads	2685868	405566068	151	145	97.32	43	2727295	481606	32.76
SRR5250392	MMMOSAM:83539a6b-13c8-4236-9da9-5d9b13a2fde6	PRJNA369475	SAMN06327798	Young BC	2017	29256859	WHM-2017-01-051			nose	colonising	0	45		1	1	1	GCF_009912875.1	0	reads	2978646	449775546	151	161	96.61	62	2742072	482807	32.75
SRR5250410	MMMOSAM:7e465add-9c6c-426e-8525-67736e37d6e0	PRJNA369475	SAMN06327816	Young BC	2017	29256859	WHM-2017-01-051			nose	colonising	0	45		1	1	1	GCF_009912875.1	0	reads	2046386	309004286	151	110	97.09	49	2740113	618574	32.74
SRR5250465	MMMOSAM:74986f09-5b58-4a69-b955-facdec389af8	PRJNA369475	SAMN06327871	Young BC	2017	29256859	WHM-2017-01-051			nose	colonising	0	45		1	1	1	GCF_009912875.1	0	reads	2942330	444291830	151	159	96.69	69	2742717	420082	32.75
SRR5250567	MMMOSAM:5e8e0b39-2788-4238-b3d6-6406d566c8b1	PRJNA369475	SAMN06327973	Young BC	2017	29256859	WHM-2017-01-051			blood	invasive	-2	45		1	1	1	GCF_009912875.1	0	reads	3672786	554590686	151	198	97.34	45	2727599	481606	32.76
SRR5251264	MMMOSAM:216a0ab1-acd4-4e43-b255-1c685aac4f2a	PRJNA369475	SAMN06328634	Young BC	2017	29256859	WHM-2017-01-051	Yes		nose	colonising	0	45					GCF_009912875.1	0	reads	3052914	460990014	151	165	96.83	48	2740087	481606	32.74
SRR5251269	MMMOSAM:20a585c6-d981-4ea6-885d-8b80b9e0710c	PRJNA369475	SAMN06328639	Young BC	2017	29256859	WHM-2017-01-051			blood	invasive	-2	45		1	1	1	GCF_009912875.1	0	reads	1741420	262954420	151	94	97.38	52	2728521	481606	32.76
SRR5251291	MMMOSAM:1c6b9b16-945f-4425-a953-277f5ed9bfb7	PRJNA369475	SAMN06328661	Young BC	2017	29256859	WHM-2017-01-051			blood	invasive	-2	45		1	1	1	GCF_009912875.1	0	reads	2686912	405723712	151	145	97.4	45	2727702	618808	32.76
SRR5249899	MMMOSAM:f3445ec5-b12c-49e2-8d7d-54f8baf97bd0	PRJNA369475	SAMN06327305	Young BC	2017	29256859	WHM-2017-01-052			blood	invasive	0	30		7	6	5	GCF_003354625.1	0	reads	3135612	473477412	151	169	95.42	70	2800621	174973	32.74
SRR5250238	MMMOSAM:a770c8fa-b7e9-4bc1-ab19-0249c324ce60	PRJNA369475	SAMN06327644	Young BC	2017	29256859	WHM-2017-01-052	Yes		nose	colonising	0	30					GCF_003354625.1	0	reads	3377778	510044478	151	182	95.38	68	2800474	174976	32.74
SRR5250350	MMMOSAM:8dbad16b-6af3-4025-a31d-bdf1a858c6d9	PRJNA369475	SAMN06327756	Young BC	2017	29256859	WHM-2017-01-052			nose	colonising	0	30		1	0	0	GCF_003354625.1	0	reads	3384440	511050440	151	183	95.38	71	2800845	174973	32.74
SRR5250370	MMMOSAM:887c03bc-020f-4504-94ae-152b05a78b53	PRJNA369475	SAMN06327776	Young BC	2017	29256859	WHM-2017-01-052		Yes	blood	invasive	0	30		5	5	5	GCF_003354625.1	0	reads	3331412	503043212	151	180	95.46	67	2800401	174976	32.74
SRR5250531	MMMOSAM:660dae4d-6241-4fd1-a7c3-20c718ba2d8e	PRJNA369475	SAMN06327937	Young BC	2017	29256859	WHM-2017-01-052			blood	invasive	0	30		7	6	5	GCF_003354625.1	0	reads	2517586	380155486	151	136	95.52	71	2800593	174977	32.74
SRR5250544	MMMOSAM:62bbba5b-4cb8-4eff-a06d-913246274790	PRJNA369475	SAMN06327950	Young BC	2017	29256859	WHM-2017-01-052			nose	colonising	0	30		1	0	0	GCF_003354625.1	0	reads	3079680	465031680	151	166	96.93	69	2758814	174977	32.74
SRR5250683	MMMOSAM:462551fb-0841-4fbf-b450-921365698434	PRJNA369475	SAMN06328089	Young BC	2017	29256859	WHM-2017-01-052			blood	invasive	0	30		7	6	5	GCF_003354625.1	0	reads	3369802	508840102	151	182	95.35	67	2800248	174973	32.74
SRR5250705	MMMOSAM:3f283fd8-af97-4049-9422-45fd702ef7a9	PRJNA369475	SAMN06328111	Young BC	2017	29256859	WHM-2017-01-052			blood	invasive	0	30		5	5	5	GCF_003354625.1	0	reads	3445016	520197416	151	186	95.13	71	2800628	174976	32.74
SRR5250826	MMMOSAM:247b9520-b725-46f7-9ad3-bad028657844	PRJNA369475	SAMN06328232	Young BC	2017	29256859	WHM-2017-01-052			nose	colonising	0	30		1	1	1	GCF_003354625.1	0	reads	3123572	471659372	151	169	94.74	70	2800792	174976	32.74
SRR5251393	MMMOSAM:0549abb3-20b3-4e2f-885a-35ed89b77a93	PRJNA369475	SAMN06328763	Young BC	2017	29256859	WHM-2017-01-052			nose	colonising	0	30		1	0	0	GCF_003354625.1	0	reads	2948562	445232862	151	159	95.28	70	2800734	174977	32.74
SRR5249918	MMMOSAM:efe2cca2-9814-4222-9fff-11c5826b669a	PRJNA369475	SAMN06327324	Young BC	2017	29256859	WHM-2017-01-053			nose	colonising	0	45		5	5	5	GCF_009911815.1	0	reads	2806422	423769722	151	151	94.64	51	2815429	343783	32.83
SRR5250032	MMMOSAM:d56296bd-8c51-4bdd-a23a-27429853641f	PRJNA369475	SAMN06327438	Young BC	2017	29256859	WHM-2017-01-053			nose	colonising	0	45		2	2	2	GCF_009911815.1	0	reads	3122040	471428040	151	169	94.69	50	2814800	343817	32.82
SRR5250447	MMMOSAM:763e7d83-b110-4fb8-a966-d7bf9d2bf240	PRJNA369475	SAMN06327853	Young BC	2017	29256859	WHM-2017-01-053			nose	colonising	0	45		2	2	2	GCF_009911815.1	0	reads	3108790	469427290	151	168	94.42	49	2814742	468455	32.82
SRR5250511	MMMOSAM:69b0b794-c62d-42e6-b3c6-94c1984f9ab3	PRJNA369475	SAMN06327917	Young BC	2017	29256859	WHM-2017-01-053			blood	invasive	0	45		1	1	1	GCF_009911815.1	0	reads	2917620	440560620	151	157	94.7	44	2814779	468399	32.82
SRR5250566	MMMOSAM:5ebe7c32-776c-4592-baf6-9c6f2cea65d2	PRJNA369475	SAMN06327972	Young BC	2017	29256859	WHM-2017-01-053			blood	invasive	0	45		1	1	1	GCF_009911815.1	0	reads	3230402	487790702	151	174	94.61	51	2814974	343817	32.82
SRR5250583	MMMOSAM:5b74aa5e-07de-4ce3-8494-be9966733a40	PRJNA369475	SAMN06327989	Young BC	2017	29256859	WHM-2017-01-053			blood	invasive	0	45		2	2	2	GCF_009911815.1	0	reads	3058768	461873968	151	165	94.71	47	2814965	480936	32.82
SRR5250584	MMMOSAM:5b6c9afa-96dd-436f-a550-4757127b58f5	PRJNA369475	SAMN06327990	Young BC	2017	29256859	WHM-2017-01-053	Yes		nose	colonising	0	45					GCF_009911815.1	0	reads	2946392	444905192	151	159	95.08	43	2814375	605284	32.82
SRR5250633	MMMOSAM:51ddc5fd-7c7b-4caf-9556-9db2f32019c9	PRJNA369475	SAMN06328039	Young BC	2017	29256859	WHM-2017-01-053			blood	invasive	0	45		1	1	1	GCF_009911815.1	0	reads	3381822	510655122	151	183	94.63	52	2815475	419970	32.83
SRR5250641	MMMOSAM:500f88b8-3a6a-47db-b692-8de8e96b3052	PRJNA369475	SAMN06328047	Young BC	2017	29256859	WHM-2017-01-053			nose	colonising	0	45		4	4	4	GCF_009911815.1	0	reads	3916408	591377608	151	212	94.49	53	2815142	480936	32.82
SRR5251294	MMMOSAM:1c227f1c-c1fa-4517-a6b3-0887ad29c2cd	PRJNA369475	SAMN06328664	Young BC	2017	29256859	WHM-2017-01-053		Yes	blood	invasive	0	45		1	1	1	GCF_009911815.1	0	reads	3127250	472214750	151	169	94.6	48	2815074	343817	32.82
SRR5249909	MMMOSAM:f1b1cd17-757a-474b-b7ee-83ec0e8c5184	PRJNA369475	SAMN06327315	Young BC	2017	29256859	WHM-2017-01-054			blood	invasive	-1	59		8	8	3	GCF_004772055.1	0	reads	3509340	529910340	151	190	97.13	86	2714232	127649	32.78
SRR5250007	MMMOSAM:dabb889d-96c8-4128-8c85-ca73c9d9b08c	PRJNA369475	SAMN06327413	Young BC	2017	29256859	WHM-2017-01-054			nose	colonising	0	59		8	8	3	GCF_004772055.1	0	reads	3344224	504977824	151	181	97.34	87	2714037	149302	32.78
SRR5250049	MMMOSAM:d2584d70-53a4-40eb-8fb2-cf182a635641	PRJNA369475	SAMN06327455	Young BC	2017	29256859	WHM-2017-01-054	Yes		nose	colonising	0	59					GCF_004772055.1	0	reads	2704960	408448960	151	146	97.26	80	2714143	134926	32.78
SRR5250061	MMMOSAM:d09cb432-89f1-42fb-91b8-d94235a6b99c	PRJNA369475	SAMN06327467	Young BC	2017	29256859	WHM-2017-01-054			nose	colonising	0	59		5	5	1	GCF_004772055.1	0	reads	3049168	460424368	151	165	97.39	77	2712764	128135	32.77
SRR5250246	MMMOSAM:a58fb116-6d8e-4dee-82ef-c3c59b14fcbf	PRJNA369475	SAMN06327652	Young BC	2017	29256859	WHM-2017-01-054		Yes	blood	invasive	-1	59		5	5	1	GCF_004772055.1	0	reads	2410782	364028082	151	130	97.32	71	2711936	149482	32.77
SRR5250283	MMMOSAM:9e7dfce2-9ff5-40c1-aa12-73f84143ef3e	PRJNA369475	SAMN06327689	Young BC	2017	29256859	WHM-2017-01-054			nose	colonising	0	59		10	10	6	GCF_004772055.1	0	reads	2775964	419170564	151	150	97.17	79	2712851	134926	32.77
SRR5250607	MMMOSAM:56eb03e0-6e6b-4b03-b03c-6a1b16f1c163	PRJNA369475	SAMN06328013	Young BC	2017	29256859	WHM-2017-01-054			blood	invasive	-1	59		6	6	3	GCF_004772055.1	0	reads	2929278	442320978	151	158	97.12	77	2712574	149482	32.77
SRR5250758	MMMOSAM:3322d3bb-cf4b-457a-b274-5012db11b46a	PRJNA369475	SAMN06328164	Young BC	2017	29256859	WHM-2017-01-054			nose	colonising	0	59		3	3	2	GCF_004772055.1	0	reads	3142820	474565820	151	170	97.33	77	2708203	134926	32.78
SRR5250801	MMMOSAM:2b7af535-eb5f-40f0-a32f-3bf482df120b	PRJNA369475	SAMN06328207	Young BC	2017	29256859	WHM-2017-01-054			blood	invasive	-1	59		7	7	3	GCF_004772055.1	0	reads	2682958	405126658	151	145	97.29	67	2707464	134926	32.76
SRR5251254	MMMOSAM:22b6400b-1491-43da-8526-0cc9a0cece25	PRJNA369475	SAMN06328624	Young BC	2017	29256859	WHM-2017-01-054			blood	invasive	-1	59		7	7	3	GCF_004772055.1	0	reads	3276686	494779586	151	177	97.28	71	2711968	134926	32.77
SRR5249850	MMMOSAM:fcd82db0-1ae7-4ae3-9a8a-1ba98541cbde	PRJNA369475	SAMN06327256	Young BC	2017	29256859	WHM-2017-01-055		Yes	blood	invasive	0	30		5	5	5	GCF_004421085.1	0	reads	3104238	468739938	151	168	95.4	61	2850631	171310	32.69
SRR5249914	MMMOSAM:f0744f4a-3178-4246-8c0d-aeac8d1ccad1	PRJNA369475	SAMN06327320	Young BC	2017	29256859	WHM-2017-01-055	Yes		nose	colonising	0	30					GCF_004421085.1	0	reads	3186394	481145494	151	172	95.1	52	2849031	171314	32.69
SRR5250031	MMMOSAM:d59f64d8-c4f7-4d00-8db4-ff6984a9eeb7	PRJNA369475	SAMN06327437	Young BC	2017	29256859	WHM-2017-01-055			nose	colonising	0	30		7	7	7	GCF_004421085.1	0	reads	3434052	518541852	151	185	95.16	55	2849478	171310	32.69
SRR5250045	MMMOSAM:d31fe7d0-6025-4c76-9c84-eaeea257581c	PRJNA369475	SAMN06327451	Young BC	2017	29256859	WHM-2017-01-055			blood	invasive	0	30		6	6	6	GCF_004421085.1	0	reads	2564682	387266982	151	138	95.45	59	2815883	171310	32.71
SRR5250146	MMMOSAM:bd5e4909-090e-4c06-bcab-b03fa1159311	PRJNA369475	SAMN06327552	Young BC	2017	29256859	WHM-2017-01-055			nose	colonising	0	30		10	9	9	GCF_004421085.1	0	reads	2492740	376403740	151	134	95.47	62	2850822	171310	32.68
SRR5250662	MMMOSAM:498ca8e2-b85a-4a98-9632-e6e5ddf40742	PRJNA369475	SAMN06328068	Young BC	2017	29256859	WHM-2017-01-055			blood	invasive	0	30		7	6	5	GCF_004421085.1	0	reads	2496586	376984486	151	135	95.56	61	2850400	154557	32.68
SRR5250688	MMMOSAM:44493575-8e3b-48a2-baf8-4e6ea8774c69	PRJNA369475	SAMN06328094	Young BC	2017	29256859	WHM-2017-01-055			blood	invasive	0	30		6	6	6	GCF_004421085.1	0	reads	3298928	498138128	151	178	95.26	56	2849780	171310	32.69
SRR5250733	MMMOSAM:3a7003c3-1300-4eab-84d6-6e8045d2fd26	PRJNA369475	SAMN06328139	Young BC	2017	29256859	WHM-2017-01-055			blood	invasive	0	30		5	5	5	GCF_004421085.1	0	reads	2085726	314944626	151	112	95.46	58	2853914	171310	32.68
SRR5251279	MMMOSAM:1eb38d06-1fc4-413e-ab4c-ddc9c9eefc34	PRJNA369475	SAMN06328649	Young BC	2017	29256859	WHM-2017-01-055			nose	colonising	0	30		7	7	6	GCF_004421085.1	0	reads	2683732	405243532	151	145	95.33	57	2850046	171310	32.69
SRR5250084	MMMOSAM:cbc60081-db87-45f6-af2a-ebb91f6b6594	PRJNA369475	SAMN06327490	Young BC	2017	29256859	WHM-2017-01-056			nose	colonising	0	45		4	4	4	GCF_009912635.1	0	reads	2995350	452297850	151	162	97.37	46	2698234	605483	32.81
SRR5250150	MMMOSAM:bc7c3b51-d0b9-40e5-9649-ff6cea606089	PRJNA369475	SAMN06327556	Young BC	2017	29256859	WHM-2017-01-056			nose	colonising	0	45		2	2	2	GCF_009912635.1	0	reads	2741984	414039584	151	148	97.42	53	2699082	606684	32.81
SRR5250167	MMMOSAM:b8d64136-e91d-4737-9743-62ce01b065f6	PRJNA369475	SAMN06327573	Young BC	2017	29256859	WHM-2017-01-056			nose	colonising	0	45		5	5	5	GCF_009912635.1	0	reads	3122872	471553672	151	169	97.53	46	2697760	480880	32.8
SRR5250278	MMMOSAM:9ee517dc-90c5-4e64-9deb-9ae02800c509	PRJNA369475	SAMN06327684	Young BC	2017	29256859	WHM-2017-01-056			blood	invasive	-1	45		1	1	1	GCF_009912635.1	0	reads	3067000	463117000	151	166	97.41	56	2699329	480880	32.81
SRR5250343	MMMOSAM:9094c364-0c0c-426e-965b-4c34d4546658	PRJNA369475	SAMN06327749	Young BC	2017	29256859	WHM-2017-01-056			blood	invasive	-1	45		1	1	1	GCF_009912635.1	0	reads	2616362	395070662	151	141	97.5	45	2697875	420015	32.8
SRR5250438	MMMOSAM:783f85ea-bcb2-4f32-b5b7-c67e3a627fc7	PRJNA369475	SAMN06327844	Young BC	2017	29256859	WHM-2017-01-056			nose	colonising	0	45		1	1	1	GCF_009912635.1	0	reads	3844938	580585638	151	208	97.49	36	2697200	605483	32.8
SRR5250458	MMMOSAM:7527fee1-864b-42ac-88d9-20e92b4d6717	PRJNA369475	SAMN06327864	Young BC	2017	29256859	WHM-2017-01-056	Yes		nose	colonising	0	45					GCF_009912635.1	0	reads	3642806	550063706	151	197	97.29	56	2699505	480880	32.81
SRR5251260	MMMOSAM:22122b78-653d-4264-a0f5-b7acebeeda6c	PRJNA369475	SAMN06328630	Young BC	2017	29256859	WHM-2017-01-056		Yes	blood	invasive	-1	45		3	3	3	GCF_009912635.1	0	reads	3204578	483891278	151	173	97.6	39	2697224	605483	32.8
SRR5251285	MMMOSAM:1dba0fb9-3c25-4f59-a4e4-8c55344e50d4	PRJNA369475	SAMN06328655	Young BC	2017	29256859	WHM-2017-01-056			blood	invasive	-1	45		3	3	3	GCF_009912635.1	0	reads	3148030	475352530	151	170	97.39	46	2698171	605483	32.8
SRR5251363	MMMOSAM:0e3f6193-2416-47ba-a7fd-0b9354112427	PRJNA369475	SAMN06328733	Young BC	2017	29256859	WHM-2017-01-056			blood	invasive	-1	45		2	2	2	GCF_009912635.1	0	reads	2793848	421871048	151	151	97.6	48	2698368	605483	32.81
SRR5250044	MMMOSAM:d33de101-a815-41d3-ac08-339a772741cb	PRJNA369475	SAMN06327450	Young BC	2017	29256859	WHM-2017-01-057			blood	invasive	0	30		3	3	3	GCF_013467165.1	0	reads	3012168	454837368	151	163	95.32	93	2826420	152540	32.7
SRR5250050	MMMOSAM:d235cdb8-c569-40a3-ac1c-5629cb23f3b9	PRJNA369475	SAMN06327456	Young BC	2017	29256859	WHM-2017-01-057			nose	colonising	0	30		4	4	4	GCF_013467165.1	0	reads	2863336	432363736	151	155	95.08	87	2824541	174940	32.7
SRR5250129	MMMOSAM:c0e01f8b-65a3-4705-9b88-b1793daf9f75	PRJNA369475	SAMN06327535	Young BC	2017	29256859	WHM-2017-01-057			nose	colonising	0	30		4	4	4	GCF_013467165.1	0	reads	3030486	457603386	151	164	95.23	88	2825545	174940	32.7
SRR5250204	MMMOSAM:aec2a62c-5902-4f59-8c83-68bad0bb34d7	PRJNA369475	SAMN06327610	Young BC	2017	29256859	WHM-2017-01-057			blood	invasive	0	30		3	3	3	GCF_013467165.1	0	reads	2748224	414981824	151	148	95.27	92	2826649	152540	32.7
SRR5250383	MMMOSAM:85017591-3f07-46d5-903c-31bae5174b8a	PRJNA369475	SAMN06327789	Young BC	2017	29256859	WHM-2017-01-057			nose	colonising	0	30		1	1	0	GCF_013467165.1	0	reads	2805662	423654962	151	151	95.39	80	2823428	174940	32.7
SRR5250560	MMMOSAM:5f995a55-341e-474d-acb0-f8b52d72be15	PRJNA369475	SAMN06327966	Young BC	2017	29256859	WHM-2017-01-057			nose	colonising	0	30		0	0	0	GCF_013467165.1	0	reads	2773650	418821150	151	150	95.16	83	2824096	174940	32.7
SRR5250724	MMMOSAM:3c8c7ecc-48cf-472c-b6d5-d0f15b01c091	PRJNA369475	SAMN06328130	Young BC	2017	29256859	WHM-2017-01-057		Yes	blood	invasive	0	30		3	3	3	GCF_013467165.1	0	reads	2962334	447312434	151	160	95.2	94	2826921	152540	32.7
SRR5250798	MMMOSAM:2bf01194-ae07-4d9c-af93-73d382cee942	PRJNA369475	SAMN06328204	Young BC	2017	29256859	WHM-2017-01-057	Yes		nose	colonising	0	30					GCF_013467165.1	0	reads	3272362	494126662	151	177	95.15	82	2823539	174939	32.7
SRR5250821	MMMOSAM:25a23f3e-5550-4c93-a268-948e71aedae8	PRJNA369475	SAMN06328227	Young BC	2017	29256859	WHM-2017-01-057			blood	invasive	0	30		3	3	3	GCF_013467165.1	0	reads	3133254	473121354	151	169	95.06	99	2827598	152540	32.7
SRR5251365	MMMOSAM:0e216b2b-11ba-469c-b889-d089c52127ea	PRJNA369475	SAMN06328735	Young BC	2017	29256859	WHM-2017-01-057			blood	invasive	0	30		3	3	3	GCF_013467165.1	0	reads	3234270	488374770	151	175	95.15	94	2826744	152540	32.7
SRR5249843	MMMOSAM:fe4c6f28-8c67-462a-951a-e7b24aed9390	PRJNA369475	SAMN06327249	Young BC	2017	29256859	WHM-2017-01-058			nose	colonising	0	15		5	5	5	GCF_001611325.1	0	reads	3154118	476271818	151	170	95.97	45	2752048	306259	32.74
SRR5249966	MMMOSAM:e3a791ad-08cb-42c9-9eef-4c0b44ea5b0e	PRJNA369475	SAMN06327372	Young BC	2017	29256859	WHM-2017-01-058			nose	colonising	0	15		5	5	5	GCF_001611325.1	0	reads	3231178	487907878	151	174	95.54	47	2752572	306545	32.75
SRR5249985	MMMOSAM:e05dadd5-44aa-470f-ad4b-a44fd57e3525	PRJNA369475	SAMN06327391	Young BC	2017	29256859	WHM-2017-01-058			nose	colonising	0	15		3	3	3	GCF_001611325.1	0	reads	2714634	409909734	151	146	95.81	52	2753028	249877	32.75
SRR5250013	MMMOSAM:d9ee3dc2-ebda-4af3-9a6a-512344a307a2	PRJNA369475	SAMN06327419	Young BC	2017	29256859	WHM-2017-01-058	Yes		nose	colonising	0	15					GCF_001611325.1	0	reads	2622212	395954012	151	141	96.43	46	2751814	437201	32.74
SRR5250108	MMMOSAM:c70b6c52-f2a6-4003-a7bf-adc99adc2217	PRJNA369475	SAMN06327514	Young BC	2017	29256859	WHM-2017-01-058			blood	invasive	0	15		10	10	10	GCF_001611325.1	0	reads	2624844	396351444	151	142	95.99	46	2752429	437201	32.75
SRR5250320	MMMOSAM:96d2c3d6-d6ed-47b8-b36d-447478d6fbd6	PRJNA369475	SAMN06327726	Young BC	2017	29256859	WHM-2017-01-058			blood	invasive	0	15		11	11	11	GCF_001611325.1	0	reads	2996742	452508042	151	162	95.91	43	2751954	306545	32.75
SRR5250344	MMMOSAM:8fe6fc65-7959-4055-8f1e-97866ce8f062	PRJNA369475	SAMN06327750	Young BC	2017	29256859	WHM-2017-01-058			blood	invasive	0	15		10	10	10	GCF_001611325.1	0	reads	2292440	346158440	151	124	95.79	49	2752382	306545	32.75
SRR5251263	MMMOSAM:2193a645-ad75-40f8-8e37-131e2a9de99d	PRJNA369475	SAMN06328633	Young BC	2017	29256859	WHM-2017-01-058		Yes	blood	invasive	0	15		10	10	10	GCF_001611325.1	0	reads	2894636	437090036	151	156	95.92	46	2752023	307031	32.75
SRR5251327	MMMOSAM:16a02405-6b9f-4cd8-a685-a813cbe277ee	PRJNA369475	SAMN06328697	Young BC	2017	29256859	WHM-2017-01-058			nose	colonising	0	15		4	4	4	GCF_001611325.1	0	reads	3532492	533406292	151	191	95.79	48	2752499	249875	32.74
SRR5251398	MMMOSAM:04839354-443b-4cf8-85dd-ee4931c8cce0	PRJNA369475	SAMN06328768	Young BC	2017	29256859	WHM-2017-01-058			blood	invasive	0	15		10	10	10	GCF_001611325.1	0	reads	3309070	499669570	151	179	95.96	47	2752459	306545	32.75
SRR5249844	MMMOSAM:fe400493-87a4-4237-a547-3a1a62ce7e46	PRJNA369475	SAMN06327250	Young BC	2017	29256859	WHM-2017-01-059			blood	invasive	0	45		8	8	6	GCF_009912875.1	0	reads	1261144	190432744	151	68	96.88	50	2714783	422413	32.78
SRR5249849	MMMOSAM:fcf1f6e7-fa82-411c-af30-f1ceba805a70	PRJNA369475	SAMN06327255	Young BC	2017	29256859	WHM-2017-01-059			nose	colonising	0	45		2	2	2	GCF_009912875.1	0	reads	4748262	474826200	100	170	94.04	132	2725544	234643	32.81
SRR5249954	MMMOSAM:e5c80962-d809-4a1b-a883-269aa0917ea6	PRJNA369475	SAMN06327360	Young BC	2017	29256859	WHM-2017-01-059		Yes	blood	invasive	0	45		10	10	8	GCF_009912875.1	0	reads	3076246	464513146	151	166	96.96	52	2715081	422919	32.78
SRR5250026	MMMOSAM:d6f9775c-4b12-4777-8b9b-d0478ba7f410	PRJNA369475	SAMN06327432	Young BC	2017	29256859	WHM-2017-01-059	Yes		nose	colonising	0	45					GCF_009912875.1	0	reads	3383906	338390600	100	121	95.08	117	2719832	234643	32.81
SRR5250027	MMMOSAM:d6877a29-43e1-4ad3-a538-84aa4cc17ae8	PRJNA369475	SAMN06327433	Young BC	2017	29256859	WHM-2017-01-059			nose	colonising	0	45		1	1	1	GCF_009912875.1	0	reads	3323406	332340600	100	119	93.71	113	2723872	264221	32.81
SRR5250174	MMMOSAM:b673eba1-fb1e-4c35-8b1e-c589f909bd89	PRJNA369475	SAMN06327580	Young BC	2017	29256859	WHM-2017-01-059			nose	colonising	0	45		2	2	2	GCF_009912875.1	0	reads	3068308	306830800	100	110	94.31	128	2725220	234643	32.81
SRR5250279	MMMOSAM:9ece1848-5fa7-4a21-9799-a7224fbc8b08	PRJNA369475	SAMN06327685	Young BC	2017	29256859	WHM-2017-01-059			nose	colonising	0	45		10	10	10	GCF_009912875.1	0	reads	3937388	393738800	100	141	95.65	85	2720014	234643	32.77
SRR5250425	MMMOSAM:7b81488f-b4d5-4a7b-920e-ac308c0ebc91	PRJNA369475	SAMN06327831	Young BC	2017	29256859	WHM-2017-01-059			nose	colonising	0	45		14	14	14	GCF_009912875.1	0	reads	4333976	433397600	100	155	95.64	110	2715943	264278	32.8
SRR5250501	MMMOSAM:6bb2a049-d241-4ff3-9039-efe023a07d89	PRJNA369475	SAMN06327907	Young BC	2017	29256859	WHM-2017-01-059			nose	colonising	0	45		2	2	1	GCF_009912875.1	0	reads	4242616	424261600	100	152	93.96	121	2724748	264221	32.81
SRR5250649	MMMOSAM:4ddf2d88-ad2d-4174-a554-62ada60ec2d3	PRJNA369475	SAMN06328055	Young BC	2017	29256859	WHM-2017-01-059			blood	invasive	0	45		8	8	6	GCF_009912875.1	0	reads	1670254	252208354	151	90	96.76	66	2716859	422413	32.79
SRR5250721	MMMOSAM:3d08ee01-5a30-454f-87a1-d864878a1446	PRJNA369475	SAMN06328127	Young BC	2017	29256859	WHM-2017-01-059			nose	colonising	0	45		3	3	3	GCF_009912875.1	0	reads	4033118	403311800	100	144	95.1	118	2724507	422384	32.81
SRR5250816	MMMOSAM:27f6f9af-e89b-481f-b519-0f6a3ae95a0e	PRJNA369475	SAMN06328222	Young BC	2017	29256859	WHM-2017-01-059			nose	colonising	0	45		2	2	2	GCF_009912875.1	0	reads	4280718	428071800	100	153	94.07	106	2722951	264221	32.8
SRR5251267	MMMOSAM:20e68e0e-c82b-4793-bf8b-b9326009d15c	PRJNA369475	SAMN06328637	Young BC	2017	29256859	WHM-2017-01-059			nose	colonising	0	45		9	9	9	GCF_009912875.1	0	reads	4891048	489104800	100	175	95.18	95	2721956	264278	32.79
SRR5251273	MMMOSAM:1f51b026-0a62-49bb-84e3-ed557c33c0c2	PRJNA369475	SAMN06328643	Young BC	2017	29256859	WHM-2017-01-059			nose	colonising	0	45		1	1	1	GCF_009912875.1	0	reads	3881324	388132400	100	139	93.88	86	2720697	264221	32.78
SRR5251310	MMMOSAM:19b5a0f3-6166-4aeb-9cce-c3cc82d78c73	PRJNA369475	SAMN06328680	Young BC	2017	29256859	WHM-2017-01-059			nose	colonising	0	45		6	6	6	GCF_009912875.1	0	reads	3834716	383471600	100	137	95.2	118	2720318	246334	32.81
SRR5251360	MMMOSAM:0ee4e865-ad6e-4aaf-aa91-08f012148812	PRJNA369475	SAMN06328730	Young BC	2017	29256859	WHM-2017-01-059			blood	invasive	0	45		8	8	6	GCF_009912875.1	0	reads	1362486	205735386	151	73	96.76	51	2714859	422413	32.78
SRR5249853	MMMOSAM:fc5a4303-809e-4ccb-a13b-3bfcea6ead74	PRJNA369475	SAMN06327259	Young BC	2017	29256859	WHM-2017-01-060			nose	colonising	0	291		0	0	0	GCF_003609855.1	0	reads	1831218	276513918	151	99	96.56	70	2732973	304305	32.82
SRR5249885	MMMOSAM:f5be349e-b4a6-490d-ac57-3bd02804c346	PRJNA369475	SAMN06327291	Young BC	2017	29256859	WHM-2017-01-060			nose	colonising	0	291		0	0	0	GCF_003609855.1	0	reads	2655934	401046034	151	143	96.67	68	2732613	304195	32.82
SRR5250034	MMMOSAM:d54a0611-b323-4c94-a908-674b80ec500a	PRJNA369475	SAMN06327440	Young BC	2017	29256859	WHM-2017-01-060			blood	invasive	67	291		4	4	4	GCF_003609855.1	0	reads	2369984	357867584	151	128	96.61	72	2733108	249721	32.82
SRR5250046	MMMOSAM:d31d5a29-5885-4356-b9dd-3b441150b163	PRJNA369475	SAMN06327452	Young BC	2017	29256859	WHM-2017-01-060			blood	invasive	67	291		4	4	4	GCF_003609855.1	0	reads	1314402	198474702	151	71	96.49	73	2733079	204070	32.82
SRR5250202	MMMOSAM:af13b38b-f6a2-4b57-8fa7-c034732d87e6	PRJNA369475	SAMN06327608	Young BC	2017	29256859	WHM-2017-01-060	Yes		nose	colonising	0	291					GCF_003609855.1	0	reads	1602062	241911362	151	86	96.61	76	2733657	304195	32.82
SRR5250446	MMMOSAM:764d9a0a-30f4-4cec-8cf0-eccf1c5fe56f	PRJNA369475	SAMN06327852	Young BC	2017	29256859	WHM-2017-01-060			nose	colonising	0	291		0	0	0	GCF_003609855.1	0	reads	1221212	184403012	151	66	96.64	70	2732891	304303	32.82
SRR5250490	MMMOSAM:6e694afe-cfe3-4b22-883b-fd8ceac41405	PRJNA369475	SAMN06327896	Young BC	2017	29256859	WHM-2017-01-060		Yes	blood	invasive	67	291		4	4	4	GCF_003609855.1	0	reads	1113248	168100448	151	60	96.6	70	2732799	203916	32.82
SRR5250573	MMMOSAM:5d5daa71-f279-4ca5-b81f-fca55fdc3523	PRJNA369475	SAMN06327979	Young BC	2017	29256859	WHM-2017-01-060			nose	colonising	0	291		1	1	1	GCF_003609855.1	0	reads	1263870	190844370	151	68	96.65	91	2735441	169877	32.83
SRR5250648	MMMOSAM:4e979cf2-acf4-42af-8af2-97d442d562de	PRJNA369475	SAMN06328054	Young BC	2017	29256859	WHM-2017-01-060			blood	invasive	67	291		4	4	4	GCF_003609855.1	0	reads	2618560	395402560	151	141	96.81	73	2733480	304195	32.82
SRR5250745	MMMOSAM:37ffe51a-6682-4e9d-879d-44734594f484	PRJNA369475	SAMN06328151	Young BC	2017	29256859	WHM-2017-01-060			blood	invasive	67	291		4	4	4	GCF_003609855.1	0	reads	1062508	160438708	151	57	96.53	94	2736233	149070	32.83
SRR5249936	MMMOSAM:eca4640c-be17-44ff-8897-7ab5dbd35e14	PRJNA369475	SAMN06327342	Young BC	2017	29256859	WHM-2017-01-061		Yes	blood	invasive	49	30		3	3	1	GCF_003194185.1	0	reads	1641372	247847172	151	88	95.58	62	2812633	175403	32.72
SRR5250177	MMMOSAM:b4cbd2af-6bcb-499e-aada-3c18c4671780	PRJNA369475	SAMN06327583	Young BC	2017	29256859	WHM-2017-01-061	Yes		nose	colonising	0	30					GCF_003194185.1	0	reads	1108414	167370514	151	60	95.42	67	2813437	175403	32.72
SRR5250319	MMMOSAM:972034ab-a6d0-4f75-8c74-e8aea8ad787c	PRJNA369475	SAMN06327725	Young BC	2017	29256859	WHM-2017-01-061			nose	colonising	0	30		3	3	0	GCF_003194185.1	0	reads	1403486	211926386	151	75	95.59	65	2813074	175403	32.71
SRR5250507	MMMOSAM:6a52f1c8-0a81-484f-8688-8d95ae8403d7	PRJNA369475	SAMN06327913	Young BC	2017	29256859	WHM-2017-01-061			blood	invasive	49	30		0	0	0	GCF_003194185.1	0	reads	1638768	247453968	151	88	95.52	63	2813352	175403	32.71
SRR5250521	MMMOSAM:6789139d-d3b7-4239-9a13-c4078b67ba00	PRJNA369475	SAMN06327927	Young BC	2017	29256859	WHM-2017-01-061			blood	invasive	49	30		0	0	0	GCF_003194185.1	0	reads	974218	147106918	151	52	95.48	67	2813151	166203	32.72
SRR5250581	MMMOSAM:5c0a2f41-e02e-4b96-b269-c9b17e931a86	PRJNA369475	SAMN06327987	Young BC	2017	29256859	WHM-2017-01-061			nose	colonising	0	30		1	1	0	GCF_003194185.1	0	reads	1568734	236878834	151	84	95.38	66	2813262	175403	32.72
SRR5250585	MMMOSAM:5b0902a4-89cb-4fd9-8b0d-01dd10887e94	PRJNA369475	SAMN06327991	Young BC	2017	29256859	WHM-2017-01-061			nose	colonising	0	30		0	0	0	GCF_003194185.1	0	reads	3289990	496788490	151	178	95.6	64	2812909	175403	32.72
SRR5250605	MMMOSAM:56f05685-8bdb-4c49-8840-1ee04ae0c837	PRJNA369475	SAMN06328011	Young BC	2017	29256859	WHM-2017-01-061			nose	colonising	0	30		2	2	0	GCF_003194185.1	0	reads	3212620	485105620	151	173	95.42	69	2813576	175416	32.72
SRR5250815	MMMOSAM:27fbf0b7-1b6e-4082-9fc3-ca4d0422261b	PRJNA369475	SAMN06328221	Young BC	2017	29256859	WHM-2017-01-061			blood	invasive	49	30		1	1	0	GCF_003194185.1	0	reads	1388768	209703968	151	75	95.51	66	2813419	175403	32.72
SRR5249884	MMMOSAM:f5c04008-d457-4731-9849-2185e6b30318	PRJNA369475	SAMN06327290	Young BC	2017	29256859	WHM-2017-01-062			blood	invasive	1	1224		3	3	2	GCF_009912335.1	0	reads	1734748	261946948	151	93	98.02	72	2722655	198984	32.71
SRR5250042	MMMOSAM:d360665a-a7af-4f41-9a09-8c4689780661	PRJNA369475	SAMN06327448	Young BC	2017	29256859	WHM-2017-01-062			nose	colonising	0	1224		0	0	0	GCF_009912335.1	0	reads	1095690	165449190	151	59	97.87	85	2724657	135773	32.71
SRR5250236	MMMOSAM:a82bc0b3-35be-40ca-9d88-e3451a2fc0eb	PRJNA369475	SAMN06327642	Young BC	2017	29256859	WHM-2017-01-062			blood	invasive	1	1224		3	3	2	GCF_009912335.1	0	reads	2610776	394227176	151	141	98.02	74	2722835	198900	32.71
SRR5250481	MMMOSAM:70b86285-3199-4091-aaef-38c12b7a60f9	PRJNA369475	SAMN06327887	Young BC	2017	29256859	WHM-2017-01-062			nose	colonising	0	1224		0	0	0	GCF_009912335.1	0	reads	1291332	194991132	151	69	98.1	72	2722510	198984	32.71
SRR5250650	MMMOSAM:4da7b84d-80ec-411b-a31d-09b5bb6f39ae	PRJNA369475	SAMN06328056	Young BC	2017	29256859	WHM-2017-01-062			blood	invasive	1	1224		2	2	2	GCF_009912335.1	0	reads	1178722	177987022	151	63	97.89	74	2722888	198900	32.71
SRR5250678	MMMOSAM:46755f9b-924a-46a0-9562-5dc871d65b21	PRJNA369475	SAMN06328084	Young BC	2017	29256859	WHM-2017-01-062			nose	colonising	0	1224		0	0	0	GCF_009912335.1	0	reads	945118	142712818	151	51	97.9	89	2724530	146442	32.71
SRR5250693	MMMOSAM:4338466a-0760-4ded-9423-1b6fdad37af7	PRJNA369475	SAMN06328099	Young BC	2017	29256859	WHM-2017-01-062		Yes	blood	invasive	1	1224		2	2	2	GCF_009912335.1	0	reads	1279444	193196044	151	69	97.59	70	2722157	198900	32.72
SRR5250700	MMMOSAM:41b096c7-6bbe-4e3a-8707-b8da3d58ec1f	PRJNA369475	SAMN06328106	Young BC	2017	29256859	WHM-2017-01-062			blood	invasive	1	1224		2	2	2	GCF_009912335.1	0	reads	1402200	211732200	151	75	97.59	67	2721972	149400	32.71
SRR5250765	MMMOSAM:315fe2f1-42bc-4cae-a73f-85cd8d5af30c	PRJNA369475	SAMN06328171	Young BC	2017	29256859	WHM-2017-01-062			nose	colonising	0	1224		1	1	0	GCF_009912335.1	0	reads	1808024	273011624	151	97	97.61	71	2722393	135773	32.71
SRR5250828	MMMOSAM:244802a1-4e52-4603-b175-606fc77e77cf	PRJNA369475	SAMN06328234	Young BC	2017	29256859	WHM-2017-01-062	Yes		nose	colonising	0	1224					GCF_009912335.1	0	reads	3527184	532604784	151	190	97.75	73	2722493	198900	32.72
SRR5249859	MMMOSAM:fb5d0ce0-aa72-4469-b5ac-159a7b01ff4b	PRJNA369475	SAMN06327265	Young BC	2017	29256859	WHM-2017-01-063			blood	invasive	-2	15		18	18	18	GCF_003354865.1	0	reads	3315332	500615132	151	179	97.29	51	2727722	315361	32.72
SRR5249951	MMMOSAM:e65aacb5-d27b-417a-99e5-1e21f28347da	PRJNA369475	SAMN06327357	Young BC	2017	29256859	WHM-2017-01-063			nose	colonising	0	15		0	0	0	GCF_003354865.1	0	reads	2929924	442418524	151	158	97.27	55	2727467	314797	32.72
SRR5249962	MMMOSAM:e47d11b1-778d-4c48-96fc-aab04642986d	PRJNA369475	SAMN06327368	Young BC	2017	29256859	WHM-2017-01-063			nose	colonising	0	15		0	0	0	GCF_003354865.1	0	reads	2372950	358315450	151	128	97.46	61	2728784	314797	32.72
SRR5250033	MMMOSAM:d55cc306-f412-48ee-90fb-69b29099cc01	PRJNA369475	SAMN06327439	Young BC	2017	29256859	WHM-2017-01-063			blood	invasive	-2	15		8	8	8	GCF_003354865.1	0	reads	3448526	520727426	151	186	97.41	52	2727137	249933	32.71
SRR5250048	MMMOSAM:d25fa71b-0dae-4da5-814d-d7b48da389a7	PRJNA369475	SAMN06327454	Young BC	2017	29256859	WHM-2017-01-063	Yes		nose	colonising	0	15					GCF_003354865.1	0	reads	2498204	377228804	151	135	97.61	50	2727096	315361	32.71
SRR5250253	MMMOSAM:a4837eee-df46-44d4-91fa-1de7f0a1029e	PRJNA369475	SAMN06327659	Young BC	2017	29256859	WHM-2017-01-063			nose	colonising	0	15		0	0	0	GCF_003354865.1	0	reads	1224726	184933626	151	66	97.2	58	2727672	315361	32.72
SRR5250333	MMMOSAM:936b278e-1240-40ac-bc25-0526ecfe2635	PRJNA369475	SAMN06327739	Young BC	2017	29256859	WHM-2017-01-063			blood	invasive	-2	15		1	1	1	GCF_003354865.1	0	reads	3484806	526205706	151	188	97.34	46	2727709	411876	32.71
SRR5251287	MMMOSAM:1d544aee-9383-4b79-a243-5897aecfec28	PRJNA369475	SAMN06328657	Young BC	2017	29256859	WHM-2017-01-063			blood	invasive	-2	15		3	3	3	GCF_003354865.1	0	reads	3045118	459812818	151	164	97.35	53	2727418	249933	32.71
SRR5251331	MMMOSAM:15227778-0140-4489-8e0e-b5e0d9e5fca5	PRJNA369475	SAMN06328701	Young BC	2017	29256859	WHM-2017-01-063		Yes	blood	invasive	-2	15		3	3	3	GCF_003354865.1	0	reads	3050004	460550604	151	165	97.38	64	2728895	243822	32.72
SRR5251381	MMMOSAM:0a74f27b-8b1f-47f2-ba11-d587d8e36a40	PRJNA369475	SAMN06328751	Young BC	2017	29256859	WHM-2017-01-063			nose	colonising	0	15		0	0	0	GCF_003354865.1	0	reads	2236550	337719050	151	121	97.39	61	2728682	314797	32.72
SRR5249869	MMMOSAM:f8b06291-fdb4-4709-ace1-abf110447ec0	PRJNA369475	SAMN06327275	Young BC	2017	29256859	WHM-2017-01-064			nose	colonising	0	45		0	0	0	GCF_009912875.1	0	reads	855542	129186842	151	46	95.99	70	2760842	255362	32.83
SRR5249890	MMMOSAM:f495eff6-3bd4-4e4d-9cf2-7e371b1d1866	PRJNA369475	SAMN06327296	Young BC	2017	29256859	WHM-2017-01-064		Yes	blood	invasive	17	45		4	4	4	GCF_009912875.1	0	reads	2538612	383330412	151	137	97.07	50	2715531	463586	32.79
SRR5249952	MMMOSAM:e650ecb3-3268-4f29-99cc-bb92ee7ea4d1	PRJNA369475	SAMN06327358	Young BC	2017	29256859	WHM-2017-01-064			blood	invasive	17	45		4	4	4	GCF_009912875.1	0	reads	2865356	432668756	151	155	97.4	37	2713772	463694	32.78
SRR5250070	MMMOSAM:cf044acf-9f77-4b8e-b69e-1fd67fe1be65	PRJNA369475	SAMN06327476	Young BC	2017	29256859	WHM-2017-01-064			blood	invasive	17	45		4	4	4	GCF_009912875.1	0	reads	1224512	184901312	151	66	97.29	49	2715532	463892	32.79
SRR5250079	MMMOSAM:cc81f7a5-fcd6-4f39-954f-23284c345b18	PRJNA369475	SAMN06327485	Young BC	2017	29256859	WHM-2017-01-064			blood	invasive	17	45		4	4	4	GCF_009912875.1	0	reads	3843960	580437960	151	208	97.1	44	2715126	463705	32.79
SRR5250433	MMMOSAM:79206faf-2284-4b41-ac26-3a9608b4b00c	PRJNA369475	SAMN06327839	Young BC	2017	29256859	WHM-2017-01-064			nose	colonising	0	45		0	0	0	GCF_009912875.1	0	reads	1782018	269084718	151	96	95.92	45	2757472	463694	32.82
SRR5250470	MMMOSAM:72697f88-b19e-44dc-b47f-e2191211b143	PRJNA369475	SAMN06327876	Young BC	2017	29256859	WHM-2017-01-064			nose	colonising	0	45		0	0	0	GCF_009912875.1	0	reads	2049164	309423764	151	110	95.9	66	2760400	463694	32.83
SRR5250610	MMMOSAM:562fe76a-876a-4d7c-baff-a3c761297b8c	PRJNA369475	SAMN06328016	Young BC	2017	29256859	WHM-2017-01-064			blood	invasive	17	45		4	4	4	GCF_009912875.1	0	reads	1441436	217656836	151	78	97.26	47	2715103	463705	32.78
SRR5250719	MMMOSAM:3d3f9788-c430-46b6-839b-17e9c3b3dae4	PRJNA369475	SAMN06328125	Young BC	2017	29256859	WHM-2017-01-064			nose	colonising	0	45		1	1	1	GCF_009912875.1	0	reads	1519650	229467150	151	82	95.9	47	2758187	463892	32.82
SRR5251266	MMMOSAM:2102d2c0-1068-4d59-a01f-8cb28e53ea0f	PRJNA369475	SAMN06328636	Young BC	2017	29256859	WHM-2017-01-064	Yes		nose	colonising	0	45					GCF_009912875.1	0	reads	1572582	237459882	151	85	95.94	50	2758314	610507	32.82
SRR5249840	MMMOSAM:fefd3cca-5421-4cbc-a09d-a63225128827	PRJNA369475	SAMN06327246	Young BC	2017	29256859	WHM-2017-01-065		Yes	blood	invasive	78	22	Yes	3	3	3	GCF_900635245.1	0	reads	1503672	227054472	151	81	96.17	92	2766453	146693	32.71
SRR5249846	MMMOSAM:fe1494ba-f517-4722-8913-a766b69e5297	PRJNA369475	SAMN06327252	Young BC	2017	29256859	WHM-2017-01-065			blood	invasive	78	22	Yes	3	3	3	GCF_900635245.1	0	reads	1217042	183773342	151	65	96.3	85	2766043	150763	32.71
SRR5249865	MMMOSAM:fa440c53-b4ea-480c-a8b4-91732f63537c	PRJNA369475	SAMN06327271	Young BC	2017	29256859	WHM-2017-01-065	Yes		nose	colonising	0	22	Yes				GCF_900635245.1	0	reads	1773936	267864336	151	96	96.88	87	2763874	150763	32.71
SRR5250235	MMMOSAM:a83868ce-42ff-4f64-8e48-352c16bb0854	PRJNA369475	SAMN06327641	Young BC	2017	29256859	WHM-2017-01-065			nose	colonising	0	22	Yes	5	5	5	GCF_900635245.1	0	reads	1018920	153856920	151	55	95.18	95	2767020	146382	32.72
SRR5250270	MMMOSAM:a0886c94-366a-472e-9bab-ce49af8f94f1	PRJNA369475	SAMN06327676	Young BC	2017	29256859	WHM-2017-01-065			blood	invasive	78	22	Yes	3	3	3	GCF_900635245.1	0	reads	2583774	390149874	151	139	96.37	72	2764192	150763	32.7
SRR5250396	MMMOSAM:81ae2152-80db-43aa-8267-0a013d1c3fd0	PRJNA369475	SAMN06327802	Young BC	2017	29256859	WHM-2017-01-065			nose	colonising	0	22	Yes	4	4	4	GCF_900635245.1	0	reads	1485940	224376940	151	80	96.35	77	2764965	150763	32.7
SRR5250487	MMMOSAM:6f932b90-1664-4aa4-8ce9-3428396550ef	PRJNA369475	SAMN06327893	Young BC	2017	29256859	WHM-2017-01-065			blood	invasive	78	22	Yes	3	3	3	GCF_900635245.1	0	reads	1270576	191856976	151	68	96.33	88	2765825	146693	32.71
SRR5250725	MMMOSAM:3c77f46c-841b-4465-8340-8fcd86e0b4d6	PRJNA369475	SAMN06328131	Young BC	2017	29256859	WHM-2017-01-065			nose	colonising	0	22	Yes	4	4	4	GCF_900635245.1	0	reads	1332608	201223808	151	72	96.53	90	2766065	151246	32.71
SRR5250806	MMMOSAM:2a39f46c-17d0-4ae9-83c8-d8fe35c00e0d	PRJNA369475	SAMN06328212	Young BC	2017	29256859	WHM-2017-01-065			blood	invasive	78	22	Yes	3	3	3	GCF_900635245.1	0	reads	2094088	316207288	151	113	96.16	89	2766610	150763	32.71
SRR5251336	MMMOSAM:13acf4a4-dd74-42e7-96de-ae9c67d092e3	PRJNA369475	SAMN06328706	Young BC	2017	29256859	WHM-2017-01-065			nose	colonising	0	22	Yes	0	0	0	GCF_900635245.1	0	reads	1251332	188951132	151	67	97.07	71	2761762	167817	32.71
SRR5249875	MMMOSAM:f7a3881a-2a12-46cc-8074-2103c08738eb	PRJNA369475	SAMN06327281	Young BC	2017	29256859	WHM-2017-01-066	Yes		nose	colonising	0	6					GCF_011035105.1	0	reads	1398274	211139374	151	75	96.14	61	2806044	341557	32.72
SRR5250057	MMMOSAM:d1705ce8-ba99-4586-8324-7a334cc63838	PRJNA369475	SAMN06327463	Young BC	2017	29256859	WHM-2017-01-066			blood	invasive	-1	6		2	2	0	GCF_011035105.1	0	reads	2595990	391994490	151	140	96.1	67	2806762	341460	32.72
SRR5250094	MMMOSAM:c98c00f0-bc31-4e9b-94db-9d97669c7165	PRJNA369475	SAMN06327500	Young BC	2017	29256859	WHM-2017-01-066			blood	invasive	-1	6		2	2	0	GCF_011035105.1	0	reads	3333266	503323166	151	180	96.05	66	2806521	249686	32.72
SRR5250154	MMMOSAM:bb43a1b7-9722-4e77-ac4d-d408025896a1	PRJNA369475	SAMN06327560	Young BC	2017	29256859	WHM-2017-01-066			nose	colonising	0	6		1	1	0	GCF_011035105.1	0	reads	2630794	397249894	151	142	96.26	52	2804653	341558	32.71
SRR5250197	MMMOSAM:b035e6fe-4c72-4be2-8ed5-c20bbda6ed9b	PRJNA369475	SAMN06327603	Young BC	2017	29256859	WHM-2017-01-066			nose	colonising	0	6		0	0	0	GCF_011035105.1	0	reads	3514308	530660508	151	190	95.93	76	2808060	294378	32.72
SRR5250473	MMMOSAM:721c0355-2b86-438f-995c-ad8aca1e4baf	PRJNA369475	SAMN06327879	Young BC	2017	29256859	WHM-2017-01-066			nose	colonising	0	6		1	1	1	GCF_011035105.1	0	reads	1995220	301278220	151	108	96.11	54	2805084	341234	32.71
SRR5250530	MMMOSAM:662025a1-708d-43c1-9c2a-147497f698c3	PRJNA369475	SAMN06327936	Young BC	2017	29256859	WHM-2017-01-066			blood	invasive	-1	6		2	2	0	GCF_011035105.1	0	reads	2621912	395908712	151	141	96.17	68	2806767	354596	32.72
SRR5250651	MMMOSAM:4d9b78cc-4c0d-4ba9-abb1-82bb963b9ffc	PRJNA369475	SAMN06328057	Young BC	2017	29256859	WHM-2017-01-066		Yes	blood	invasive	-1	6		2	2	0	GCF_011035105.1	0	reads	1913368	288918568	151	103	95.59	47	2804362	491781	32.71
SRR5250776	MMMOSAM:301bae3f-bf71-4c15-81f8-cdc7ca9bf2fb	PRJNA369475	SAMN06328182	Young BC	2017	29256859	WHM-2017-01-066			blood	invasive	-1	6		2	2	0	GCF_011035105.1	0	reads	2215830	334590330	151	119	96.16	60	2806063	341271	32.72
SRR5250012	MMMOSAM:da25bd41-54e4-471d-afaf-06a283192954	PRJNA369475	SAMN06327418	Young BC	2017	29256859	WHM-2017-01-067	Yes		nose	colonising	0	59					GCF_009912335.1	0	reads	2994354	452147454	151	162	97.21	76	2754483	164928	32.74
SRR5250156	MMMOSAM:bb0806ac-63ef-4aac-905f-2bda9754bd68	PRJNA369475	SAMN06327562	Young BC	2017	29256859	WHM-2017-01-067			nose	colonising	0	59		3	2	2	GCF_009912335.1	0	reads	2387860	360566860	151	129	97.09	83	2755737	153702	32.74
SRR5250342	MMMOSAM:913bd072-2c1f-4348-aae0-58652e75c15f	PRJNA369475	SAMN06327748	Young BC	2017	29256859	WHM-2017-01-067			nose	colonising	0	59		3	1	1	GCF_009912335.1	0	reads	3007074	454068174	151	162	96.73	86	2755817	154018	32.74
SRR5250554	MMMOSAM:61272ffc-671c-426e-8a59-0b43f761a91f	PRJNA369475	SAMN06327960	Young BC	2017	29256859	WHM-2017-01-067			nose	colonising	0	59		3	1	1	GCF_009912335.1	0	reads	2031286	306724186	151	109	96.95	92	2756391	154018	32.74
SRR5251344	MMMOSAM:113bf6f6-0721-4cf6-829b-6883355f7bf2	PRJNA369475	SAMN06328714	Young BC	2017	29256859	WHM-2017-01-067			nose	colonising	0	59		4	2	2	GCF_009912335.1	0	reads	3209560	484643560	151	173	97.22	84	2755767	149504	32.74
SRR5249983	MMMOSAM:e09ce422-5629-4e78-ba01-c97ab5f43845	PRJNA369475	SAMN06327389	Young BC	2017	29256859	WHM-2017-01-068			nose	colonising	0	22	Yes	1	0	0	GCF_900635245.1	0	reads	3275684	494628284	151	177	93.58	119	2870650	131672	32.75
SRR5250078	MMMOSAM:cd225fe5-fe93-4bb4-ae49-9707183f6c07	PRJNA369475	SAMN06327484	Young BC	2017	29256859	WHM-2017-01-068			nose	colonising	0	22	Yes	1	0	0	GCF_900635245.1	0	reads	3133014	473085114	151	169	93.75	113	2871330	146381	32.75
SRR5250166	MMMOSAM:b8fba001-4c90-4a77-8127-9ae4bad6f1ae	PRJNA369475	SAMN06327572	Young BC	2017	29256859	WHM-2017-01-068			skin	invasive	14	22	Yes	4	3	3	GCF_900635245.1	0	reads	1138858	171967558	151	61	93.93	116	2871299	163800	32.75
SRR5250295	MMMOSAM:9b995e28-d6dc-4765-8aad-5fe908447910	PRJNA369475	SAMN06327701	Young BC	2017	29256859	WHM-2017-01-068			skin	invasive	14	22	Yes	2	1	1	GCF_900635245.1	0	reads	1310664	197910264	151	70	93.66	113	2870392	131673	32.75
SRR5250562	MMMOSAM:5f7a71a3-e29c-428f-947a-740ea531051e	PRJNA369475	SAMN06327968	Young BC	2017	29256859	WHM-2017-01-068			nose	colonising	0	22	Yes	1	0	0	GCF_900635245.1	0	reads	3335258	503623958	151	180	93.66	106	2870686	146381	32.75
SRR5250729	MMMOSAM:3ba5755e-072c-4bf8-ad41-142aa316e092	PRJNA369475	SAMN06328135	Young BC	2017	29256859	WHM-2017-01-068			skin	invasive	14	22	Yes	2	2	2	GCF_900635245.1	0	reads	1591206	240272106	151	86	93.74	119	2870936	131673	32.75
SRR5250736	MMMOSAM:39912c68-c71b-47c0-89b0-2ae894bc3173	PRJNA369475	SAMN06328142	Young BC	2017	29256859	WHM-2017-01-068			skin	invasive	14	22	Yes	2	1	1	GCF_900635245.1	0	reads	1706314	257653414	151	92	93.71	117	2870788	146381	32.75
SRR5250760	MMMOSAM:3307661d-798b-4f0a-a5e5-7b38a7bc7e64	PRJNA369475	SAMN06328166	Young BC	2017	29256859	WHM-2017-01-068	Yes		nose	colonising	0	22	Yes				GCF_900635245.1	0	reads	2907792	439076592	151	157	93.66	104	2870415	146381	32.74
SRR5250819	MMMOSAM:25f136ac-925e-4d9e-9b44-7e888d0963be	PRJNA369475	SAMN06328225	Young BC	2017	29256859	WHM-2017-01-068			nose	colonising	0	22	Yes	2	1	1	GCF_900635245.1	0	reads	2925686	441778586	151	158	93.64	103	2869761	146381	32.75
SRR5251321	MMMOSAM:18814101-a647-4341-a325-2c2645ee861c	PRJNA369475	SAMN06328691	Young BC	2017	29256859	WHM-2017-01-068		Yes	skin	invasive	14	22	Yes	3	2	2	GCF_900635245.1	0	reads	1413342	213414642	151	76	93.67	120	2870785	146381	32.75
SRR5250191	MMMOSAM:b16f0f7e-34bc-4cc0-8963-1473c872b6d0	PRJNA369475	SAMN06327597	Young BC	2017	29256859	WHM-2017-01-069			bone	invasive	0	109		5	5	5	GCF_003030225.1	0	reads	1129292	170523092	151	61	96.21	33	2802724	779876	32.68
SRR5250262	MMMOSAM:a23e0874-f3b3-48d1-9680-341162dd7a09	PRJNA369475	SAMN06327668	Young BC	2017	29256859	WHM-2017-01-069			nose	colonising	0	109		0	0	0	GCF_003030225.1	0	reads	1385754	209248854	151	75	95.95	31	2801743	902944	32.68
SRR5250457	MMMOSAM:753c580a-4865-43ef-bf67-f06ece0197a1	PRJNA369475	SAMN06327863	Young BC	2017	29256859	WHM-2017-01-069	Yes		nose	colonising	0	109					GCF_003030225.1	0	reads	1371148	207043348	151	74	95.8	41	2803639	635062	32.68
SRR5250494	MMMOSAM:6d950c71-3f02-4011-a38e-ac55f4652a2a	PRJNA369475	SAMN06327900	Young BC	2017	29256859	WHM-2017-01-069			nose	colonising	0	109		6	6	6	GCF_003030225.1	0	reads	1350116	203867516	151	73	96.07	25	2801457	903088	32.68
SRR5250551	MMMOSAM:6166a93c-d9cf-4ecd-90f9-a4ca19c70007	PRJNA369475	SAMN06327957	Young BC	2017	29256859	WHM-2017-01-069			bone	invasive	0	109		5	5	5	GCF_003030225.1	0	reads	1199278	181090978	151	64	96.17	29	2802000	903088	32.68
SRR5250773	MMMOSAM:30647369-3f07-41c0-8482-f211f70a5c7d	PRJNA369475	SAMN06328179	Young BC	2017	29256859	WHM-2017-01-069			bone	invasive	0	109		5	5	5	GCF_003030225.1	0	reads	1069346	161471246	151	57	96.17	31	2802146	623830	32.68
SRR5251252	MMMOSAM:230e959d-8f67-4b31-9f6d-36fc20e8613b	PRJNA369475	SAMN06328239	Young BC	2017	29256859	WHM-2017-01-069			bone	invasive	0	109		5	5	5	GCF_003030225.1	0	reads	2436954	367980054	151	131	96.33	28	2801880	903088	32.68
SRR5251329	MMMOSAM:16267ec1-981a-46c9-b10f-64a451b3e137	PRJNA369475	SAMN06328699	Young BC	2017	29256859	WHM-2017-01-069		Yes	bone	invasive	0	109		5	5	5	GCF_003030225.1	0	reads	1159130	175028630	151	62	96.18	34	2802273	767312	32.68
SRR5251343	MMMOSAM:11633484-ba00-4e35-aa1c-2de500f3e8ef	PRJNA369475	SAMN06328713	Young BC	2017	29256859	WHM-2017-01-069			nose	colonising	0	109		7	7	7	GCF_003030225.1	0	reads	3295296	497589696	151	178	96.01	29	2801543	623830	32.67
SRR5249923	MMMOSAM:ef51a5b9-c0b5-4af3-a32d-add2033a15c8	PRJNA369475	SAMN06327329	Young BC	2017	29256859	WHM-2017-01-070	Yes		nose	colonising	0	1535					GCF_001611345.1	0	reads	1412618	213305318	151	76	95.02	60	2751660	382714	32.72
SRR5250047	MMMOSAM:d2cbf3ac-5f0a-4e83-ae46-b7e5ceb4292e	PRJNA369475	SAMN06327453	Young BC	2017	29256859	WHM-2017-01-070			blood	invasive	-1	1535		4	3	2	GCF_001611345.1	0	reads	3002770	453418270	151	162	95.1	59	2751764	251609	32.72
SRR5250237	MMMOSAM:a77407ba-5248-494b-b3f6-99bea0369da3	PRJNA369475	SAMN06327643	Young BC	2017	29256859	WHM-2017-01-070			blood	invasive	-1	1535		3	2	2	GCF_001611345.1	0	reads	874072	131984872	151	47	95.06	82	2754717	222348	32.72
SRR5250424	MMMOSAM:7b82635f-cf20-4b62-b013-7d44550b0956	PRJNA369475	SAMN06327830	Young BC	2017	29256859	WHM-2017-01-070			nose	colonising	0	1535		1	0	0	GCF_001611345.1	0	reads	1207300	182302300	151	65	95.3	90	2755687	243688	32.73
SRR5250482	MMMOSAM:70952a7a-df2c-494f-ae68-b0af7caf4635	PRJNA369475	SAMN06327888	Young BC	2017	29256859	WHM-2017-01-070			nose	colonising	0	1535		1	0	0	GCF_001611345.1	0	reads	1289320	194687320	151	69	95.36	72	2754354	249933	32.72
SRR5250570	MMMOSAM:5da6407e-8895-4415-a02b-fb4718289205	PRJNA369475	SAMN06327976	Young BC	2017	29256859	WHM-2017-01-070			blood	invasive	-1	1535		3	2	2	GCF_001611345.1	0	reads	2770492	418344292	151	150	95.32	64	2752911	244641	32.72
SRR5250718	MMMOSAM:3d6574b5-ba5b-4313-b8c3-ab678a20676f	PRJNA369475	SAMN06328124	Young BC	2017	29256859	WHM-2017-01-070		Yes	blood	invasive	-1	1535		3	2	2	GCF_001611345.1	0	reads	2152410	325013910	151	116	95.22	52	2751264	251609	32.72
SRR5250811	MMMOSAM:28f59bfa-ee06-4867-bce9-a0504a88ad48	PRJNA369475	SAMN06328217	Young BC	2017	29256859	WHM-2017-01-070			blood	invasive	-1	1535		3	2	2	GCF_001611345.1	0	reads	2072476	312943876	151	112	95.1	62	2752389	249931	32.72
SRR5251348	MMMOSAM:10ead634-bd5d-4826-b04c-3917951a8e18	PRJNA369475	SAMN06328718	Young BC	2017	29256859	WHM-2017-01-070			nose	colonising	0	1535		1	0	0	GCF_001611345.1	0	reads	1066590	161055090	151	57	94.99	73	2754052	222064	32.72
SRR5251359	MMMOSAM:0f038d3e-b77e-41ba-a2fa-3914f2355509	PRJNA369475	SAMN06328729	Young BC	2017	29256859	WHM-2017-01-070			nose	colonising	0	1535		2	1	1	GCF_001611345.1	0	reads	3113412	470125212	151	168	95.22	69	2753006	249931	32.72
SRR5249969	MMMOSAM:e36396e2-2151-42d7-a306-8ae7a955e97f	PRJNA369475	SAMN06327375	Young BC	2017	29256859	WHM-2017-01-071			nose	colonising	0	22	Yes	1	0	0	GCF_001018835.2	0	reads	2811682	424563982	151	152	95.07	89	2863296	146746	32.7
SRR5250014	MMMOSAM:d92af02e-58fc-4880-baa5-5c4e244c19ca	PRJNA369475	SAMN06327420	Young BC	2017	29256859	WHM-2017-01-071			nose	colonising	0	22	Yes	1	0	0	GCF_001018835.2	0	reads	1644590	248333090	151	89	95.04	84	2861944	146692	32.69
SRR5250036	MMMOSAM:d437eef4-8eeb-4715-beb9-8dd2ec9251d8	PRJNA369475	SAMN06327442	Young BC	2017	29256859	WHM-2017-01-071			nose	colonising	0	22	Yes	0	0	0	GCF_001018835.2	0	reads	959022	144812322	151	51	95.04	98	2863245	170682	32.69
SRR5250411	MMMOSAM:7e033c5d-bbd0-40ea-9ccf-1590bb0e64a6	PRJNA369475	SAMN06327817	Young BC	2017	29256859	WHM-2017-01-071			skin	invasive	3	22	Yes	5	5	5	GCF_001018835.2	0	reads	1117000	168667000	151	60	94.89	87	2862935	150763	32.69
SRR5250493	MMMOSAM:6da9388f-dda6-470b-ab9c-e6a1ade7f0b5	PRJNA369475	SAMN06327899	Young BC	2017	29256859	WHM-2017-01-071			skin	invasive	3	22	Yes	6	5	5	GCF_001018835.2	0	reads	980978	148127678	151	53	95.25	92	2862932	146382	32.69
SRR5250516	MMMOSAM:68763968-d4f5-44c1-93f7-7a801143e440	PRJNA369475	SAMN06327922	Young BC	2017	29256859	WHM-2017-01-071			skin	invasive	3	22	Yes	5	5	5	GCF_001018835.2	0	reads	1082144	163403744	151	58	95.18	92	2862676	146382	32.69
SRR5250541	MMMOSAM:638ec67b-1715-4e56-9bb7-fed5bf34f333	PRJNA369475	SAMN06327947	Young BC	2017	29256859	WHM-2017-01-071			nose	colonising	0	22	Yes	1	0	0	GCF_001018835.2	0	reads	1869502	282294802	151	101	95.03	99	2863848	146382	32.7
SRR5250588	MMMOSAM:5a1c2df7-7c3b-4b45-b6a0-431aff252789	PRJNA369475	SAMN06327994	Young BC	2017	29256859	WHM-2017-01-071			skin	invasive	3	22	Yes	5	5	5	GCF_001018835.2	0	reads	1216614	183708714	151	65	95.22	87	2862351	167759	32.69
SRR5250817	MMMOSAM:27e1e14c-990c-45b3-90c6-c496df207bcf	PRJNA369475	SAMN06328223	Young BC	2017	29256859	WHM-2017-01-071		Yes	skin	invasive	3	22	Yes	6	5	5	GCF_001018835.2	0	reads	1867366	281972266	151	101	95.05	98	2863434	146692	32.7
SRR5251338	MMMOSAM:12acad47-226e-456b-a56c-f0d67d885652	PRJNA369475	SAMN06328708	Young BC	2017	29256859	WHM-2017-01-071	Yes		nose	colonising	0	22	Yes				GCF_001018835.2	0	reads	3126266	472066166	151	169	94.94	80	2861551	146692	32.69
SRR5250054	MMMOSAM:d19b7bff-ad54-46c7-9547-7c8b9260ac7b	PRJNA369475	SAMN06327460	Young BC	2017	29256859	WHM-2017-01-072			skin	invasive	3	1		24	24	24	GCF_002209325.1	0	reads	1205128	181974328	151	65	96.39	42	2799589	737850	32.69
SRR5250149	MMMOSAM:bce3a226-0d5e-4e22-90e3-74e662689257	PRJNA369475	SAMN06327555	Young BC	2017	29256859	WHM-2017-01-072			nose	colonising	0	1		5	5	5	GCF_002209325.1	0	reads	1426336	215376736	151	77	96.34	29	2797627	737376	32.69
SRR5250200	MMMOSAM:af9727e2-9b68-4b1e-9b04-370445033999	PRJNA369475	SAMN06327606	Young BC	2017	29256859	WHM-2017-01-072			skin	invasive	3	1		9	9	9	GCF_002209325.1	0	reads	1637888	247321088	151	88	96.37	39	2799461	314889	32.69
SRR5250503	MMMOSAM:6b76c46d-37f0-42dc-acdc-358dfd50db6b	PRJNA369475	SAMN06327909	Young BC	2017	29256859	WHM-2017-01-072			nose	colonising	0	1		5	5	5	GCF_002209325.1	0	reads	2309858	348788558	151	125	96.32	28	2799281	737338	32.69
SRR5251288	MMMOSAM:1d1701fe-925e-4784-9c99-3a9cdc47eb0a	PRJNA369475	SAMN06328658	Young BC	2017	29256859	WHM-2017-01-072			skin	invasive	3	1		24	24	24	GCF_002209325.1	0	reads	946642	142942942	151	51	96.49	29	2798066	737888	32.69
SRR5251306	MMMOSAM:1abaad9a-64ba-41ce-879d-77ebbd060408	PRJNA369475	SAMN06328676	Young BC	2017	29256859	WHM-2017-01-072			nose	colonising	0	1		4	4	4	GCF_002209325.1	0	reads	735206	111016106	151	39	96.54	42	2799727	737739	32.69
SRR5251326	MMMOSAM:17726ecc-95fb-4373-a57d-698e7773e0c3	PRJNA369475	SAMN06328696	Young BC	2017	29256859	WHM-2017-01-072		Yes	skin	invasive	3	1		23	23	23	GCF_002209325.1	0	reads	1162210	175493710	151	62	96.25	30	2798169	737888	32.69
SRR5251328	MMMOSAM:16942b79-eec3-498a-bdea-d418ad316ffc	PRJNA369475	SAMN06328698	Young BC	2017	29256859	WHM-2017-01-072	Yes		nose	colonising	0	1					GCF_002209325.1	0	reads	2413148	364385348	151	130	96.4	27	2797194	738220	32.69
SRR5249987	MMMOSAM:e033ae96-a897-47be-b3f6-8ac6f257670f	PRJNA369475	SAMN06327393	Young BC	2017	29256859	WHM-2017-01-073			nose	colonising	0	22	Yes	1	1	0	GCF_900635905.1	0	reads	1366134	206286234	151	73	95.56	78	2770407	156421	32.76
SRR5250059	MMMOSAM:d0bac838-2f39-42f1-8da9-69ff250dfdd3	PRJNA369475	SAMN06327465	Young BC	2017	29256859	WHM-2017-01-073			skin	invasive	16	22	Yes	49	49	49	GCF_900635905.1	0	reads	1200312	181247112	151	64	95.17	95	2845735	167739	32.68
SRR5250072	MMMOSAM:ceea9e2c-58ba-41f2-b752-8ed920b68353	PRJNA369475	SAMN06327478	Young BC	2017	29256859	WHM-2017-01-073			skin	invasive	16	22	Yes	51	51	50	GCF_900635905.1	0	reads	2432938	367373638	151	131	95.24	71	2843580	170642	32.68
SRR5250249	MMMOSAM:a566f0d3-0fe2-4449-8ac1-9136ede0f267	PRJNA369475	SAMN06327655	Young BC	2017	29256859	WHM-2017-01-073			nose	colonising	0	22	Yes	8	8	8	GCF_900635905.1	0	reads	1061014	160213114	151	57	95.49	87	2771737	167719	32.76
SRR5250397	MMMOSAM:81266f78-feba-4cc7-9c3b-e2fd5197ed68	PRJNA369475	SAMN06327803	Young BC	2017	29256859	WHM-2017-01-073			nose	colonising	0	22	Yes	9	9	8	GCF_900635905.1	0	reads	2561796	386831196	151	138	95.29	63	2769274	167846	32.76
SRR5250502	MMMOSAM:6b84d79e-3c0d-44d6-bf38-9f3c200396e8	PRJNA369475	SAMN06327908	Young BC	2017	29256859	WHM-2017-01-073			skin	invasive	16	22	Yes	50	50	49	GCF_900635905.1	0	reads	1965440	296781440	151	106	95.08	75	2843783	166491	32.68
SRR5250591	MMMOSAM:59dce6d6-2baa-49f0-b11e-c3dc0df46d4a	PRJNA369475	SAMN06327997	Young BC	2017	29256859	WHM-2017-01-073		Yes	skin	invasive	16	22	Yes	50	50	49	GCF_900635905.1	0	reads	1835434	277150534	151	99	95.06	67	2843024	170642	32.68
SRR5250697	MMMOSAM:424eb8ee-716d-43a3-b948-3532d388a7cd	PRJNA369475	SAMN06328103	Young BC	2017	29256859	WHM-2017-01-073			nose	colonising	0	22	Yes	8	8	8	GCF_900635905.1	0	reads	1292776	195209176	151	69	95.28	80	2770160	151227	32.76
SRR5250754	MMMOSAM:3422ef14-dc6c-4273-9773-585b5069e8a6	PRJNA369475	SAMN06328160	Young BC	2017	29256859	WHM-2017-01-073	Yes		nose	colonising	0	22	Yes				GCF_900635905.1	0	reads	1200598	181290298	151	65	95.96	80	2768071	150763	32.76
SRR5251371	MMMOSAM:0d67559a-42b5-483d-99a4-f18aaa213a34	PRJNA369475	SAMN06328741	Young BC	2017	29256859	WHM-2017-01-073			skin	invasive	16	22	Yes	50	50	49	GCF_900635905.1	0	reads	1615882	243998182	151	87	95.18	82	2845056	150789	32.68
SRR5250030	MMMOSAM:d605be12-fa43-47b4-a724-b8160619faeb	PRJNA369475	SAMN06327436	Young BC	2017	29256859	WHM-2017-01-074		Yes	bone	invasive	0	398		3	3	2	GCF_002089035.2	0	reads	1308896	197643296	151	70	97.22	61	2700955	409292	32.83
SRR5250055	MMMOSAM:d179bb32-45cc-4db5-b9c5-03e1994d6530	PRJNA369475	SAMN06327461	Young BC	2017	29256859	WHM-2017-01-074			nose	colonising	0	398		1	1	1	GCF_002089035.2	0	reads	948906	143284806	151	51	97.1	61	2700889	409292	32.83
SRR5250124	MMMOSAM:c3b4a853-1130-4b9b-83a2-ad6321d949a8	PRJNA369475	SAMN06327530	Young BC	2017	29256859	WHM-2017-01-074			bone	invasive	0	398		3	3	2	GCF_002089035.2	0	reads	1797242	271383542	151	97	97.16	55	2700064	409292	32.82
SRR5250172	MMMOSAM:b72048ba-0605-4b03-9851-9b709559fa89	PRJNA369475	SAMN06327578	Young BC	2017	29256859	WHM-2017-01-074			bone	invasive	0	398		3	3	2	GCF_002089035.2	0	reads	1170504	176746104	151	63	96.83	60	2700523	409292	32.83
SRR5250299	MMMOSAM:9b2c4d3c-6d74-46a2-a570-26b3cf466a43	PRJNA369475	SAMN06327705	Young BC	2017	29256859	WHM-2017-01-074			bone	invasive	0	398		3	3	2	GCF_002089035.2	0	reads	1652718	249560418	151	89	97.16	61	2700825	409292	32.83
SRR5250656	MMMOSAM:4c766df4-fce5-47e6-acc3-b6158c954793	PRJNA369475	SAMN06328062	Young BC	2017	29256859	WHM-2017-01-074			nose	colonising	0	398		0	0	0	GCF_002089035.2	0	reads	1491516	225218916	151	80	97.13	62	2700806	211479	32.83
SRR5250739	MMMOSAM:38fb1154-d003-4027-bcd2-3d8e492c8a65	PRJNA369475	SAMN06328145	Young BC	2017	29256859	WHM-2017-01-074			bone	invasive	0	398		3	3	2	GCF_002089035.2	0	reads	2385426	360199326	151	129	97.36	60	2700611	409292	32.82
SRR5251356	MMMOSAM:0fa5ac7c-5edb-4c03-a3ac-9c3cd738893b	PRJNA369475	SAMN06328726	Young BC	2017	29256859	WHM-2017-01-074			nose	colonising	0	398		1	1	0	GCF_002089035.2	0	reads	3503734	529063834	151	189	97.12	56	2700412	409292	32.82
SRR5251357	MMMOSAM:0f5b2408-9e18-4970-a99e-6641bb42b610	PRJNA369475	SAMN06328727	Young BC	2017	29256859	WHM-2017-01-074	Yes		nose	colonising	0	398					GCF_002089035.2	0	reads	962262	145301562	151	52	96.83	58	2700643	409292	32.83
SRR5251390	MMMOSAM:06fc4329-e2d2-4a1b-b448-ebf0c236d8d1	PRJNA369475	SAMN06328760	Young BC	2017	29256859	WHM-2017-01-074			nose	colonising	0	398		1	1	0	GCF_002089035.2	0	reads	2738424	413502024	151	148	97	55	2700124	409292	32.82
SRR5249871	MMMOSAM:f846fbd3-278e-42dc-bcde-4a0d4086312d	PRJNA369475	SAMN06327277	Young BC	2017	29256859	WHM-2017-01-075			nose	colonising	0	-		0	0	0	GCF_009912475.1	0	reads	2410788	364028988	151	130	94.18	60	2866278	169401	32.71
SRR5250790	MMMOSAM:2d894a32-168b-407e-ad45-3406b23c368a	PRJNA369475	SAMN06328196	Young BC	2017	29256859	WHM-2017-01-075			nose	colonising	0	-		0	0	0	GCF_009912475.1	0	reads	1165074	175926174	151	63	94.34	58	2865912	169401	32.71
SRR5250792	MMMOSAM:2d64be65-032b-4f7d-a6c0-f2297ed89ed9	PRJNA369475	SAMN06328198	Young BC	2017	29256859	WHM-2017-01-075			nose	colonising	0	-		0	0	0	GCF_009912475.1	0	reads	1023504	154549104	151	55	94.42	60	2866015	169401	32.71
SRR5251292	MMMOSAM:1c6818e2-5f4d-457b-abeb-d7807de380ea	PRJNA369475	SAMN06328662	Young BC	2017	29256859	WHM-2017-01-075			nose	colonising	0	-		1	1	1	GCF_009912475.1	0	reads	1114558	168298258	151	60	94.32	62	2866396	169401	32.71
SRR5251353	MMMOSAM:0ff257d2-94ee-4f6a-b08f-9b2a6a961056	PRJNA369475	SAMN06328723	Young BC	2017	29256859	WHM-2017-01-075	Yes		nose	colonising	0	-					GCF_009912475.1	0	reads	1300174	196326274	151	70	94.5	58	2865886	169401	32.71
SRR5249887	MMMOSAM:f5241377-5e11-405c-854d-3a80b6421866	PRJNA369475	SAMN06327293	Young BC	2017	29256859	WHM-2017-01-076			nose	colonising	0	88		0	0	0	GCF_900096745.1	0	reads	1421636	214667036	151	76	96.66	48	2746965	701589	32.76
SRR5249967	MMMOSAM:e3a7095a-e582-48f2-8c65-8750c5188f1d	PRJNA369475	SAMN06327373	Young BC	2017	29256859	WHM-2017-01-076			blood	invasive	-3	88		8	8	8	GCF_900096745.1	0	reads	3041684	459294284	151	164	96.78	40	2746071	700975	32.76
SRR5249976	MMMOSAM:e1d2a9f4-6344-49c3-ac1d-12cf1ffc4aed	PRJNA369475	SAMN06327382	Young BC	2017	29256859	WHM-2017-01-076			nose	colonising	0	88		0	0	0	GCF_900096745.1	0	reads	2997392	452606192	151	162	96.61	42	2747045	701589	32.76
SRR5250163	MMMOSAM:ba1e0db8-847a-4c01-9159-3837c3e347c6	PRJNA369475	SAMN06327569	Young BC	2017	29256859	WHM-2017-01-076			blood	invasive	-3	88		9	9	9	GCF_900096745.1	0	reads	3651004	365100400	100	130	95.66	137	2750188	298011	32.79
SRR5250488	MMMOSAM:6f5cbd00-3c2e-4619-9639-3ef528e07e55	PRJNA369475	SAMN06327894	Young BC	2017	29256859	WHM-2017-01-076			blood	invasive	-3	88		8	8	8	GCF_900096745.1	0	reads	1600580	241687580	151	86	96.79	70	2747218	699067	32.76
SRR5250496	MMMOSAM:6cbdb90e-113e-407d-9cc6-3f3c8738734d	PRJNA369475	SAMN06327902	Young BC	2017	29256859	WHM-2017-01-076			blood	invasive	-3	88		8	8	8	GCF_900096745.1	0	reads	2515560	379849560	151	136	96.78	67	2748686	699649	32.76
SRR5250592	MMMOSAM:59106c47-9005-4d34-96eb-cc284f0fe82a	PRJNA369475	SAMN06327998	Young BC	2017	29256859	WHM-2017-01-076			nose	colonising	0	88		0	0	0	GCF_900096745.1	0	reads	1363812	205935612	151	73	96.61	66	2748596	700437	32.76
SRR5250632	MMMOSAM:529c59da-96c6-4a75-a0c1-38908eeef43a	PRJNA369475	SAMN06328038	Young BC	2017	29256859	WHM-2017-01-076		Yes	blood	invasive	-3	88		8	8	8	GCF_900096745.1	0	reads	1437742	217099042	151	77	96.86	64	2746754	698716	32.76
SRR5250813	MMMOSAM:2848ab4c-c572-4b03-ace0-2783a9afb23e	PRJNA369475	SAMN06328219	Young BC	2017	29256859	WHM-2017-01-076	Yes		nose	colonising	0	88					GCF_900096745.1	0	reads	2124184	320751784	151	115	97.05	55	2747774	700437	32.76
SRR5251388	MMMOSAM:07d00339-b036-46d5-a900-e095f23839e7	PRJNA369475	SAMN06328758	Young BC	2017	29256859	WHM-2017-01-076			nose	colonising	0	88		0	0	0	GCF_900096745.1	0	reads	1181148	178353348	151	63	96.7	75	2749343	700053	32.76
SRR5249870	MMMOSAM:f886b46b-f096-4560-bd1e-bea0d8bf4326	PRJNA369475	SAMN06327276	Young BC	2017	29256859	WHM-2017-01-077	Yes		nose	colonising	0	291					GCF_003609855.1	0	reads	1318204	199048804	151	71	96.61	110	2737094	183416	32.84
SRR5249980	MMMOSAM:e0d10687-9e49-4351-8e22-a9a2af0dd142	PRJNA369475	SAMN06327386	Young BC	2017	29256859	WHM-2017-01-077			nose	colonising	0	291		2	2	2	GCF_003609855.1	0	reads	1363532	205893332	151	73	96.71	95	2735292	170270	32.83
SRR5250547	MMMOSAM:62069516-3b13-4355-9b6b-da1cd4b8f07c	PRJNA369475	SAMN06327953	Young BC	2017	29256859	WHM-2017-01-077			nose	colonising	0	291		5	5	5	GCF_003609855.1	0	reads	1789142	270160442	151	96	96.73	84	2733792	165520	32.83
SRR5251278	MMMOSAM:1ebd29f6-e824-486c-a310-940d269cf999	PRJNA369475	SAMN06328648	Young BC	2017	29256859	WHM-2017-01-077			nose	colonising	0	291		6	5	5	GCF_003609855.1	0	reads	1537644	232184244	151	83	96.74	79	2733631	170561	32.83
SRR5249854	MMMOSAM:fc557915-6c3f-4794-91bd-7233f145df34	PRJNA369475	SAMN06327260	Young BC	2017	29256859	WHM-2017-01-078			bone	invasive	13	3437		3	3	3	GCF_009912835.1	0	reads	1474986	222722886	151	79	95.5	93	2800522	150298	32.74
SRR5249881	MMMOSAM:f6686eaa-3c2b-42fe-b7ee-5ae1f134d0a6	PRJNA369475	SAMN06327287	Young BC	2017	29256859	WHM-2017-01-078		Yes	blood	invasive	0	3437		3	3	3	GCF_009912835.1	0	reads	1283822	193857122	151	69	95.13	87	2799216	149764	32.74
SRR5249898	MMMOSAM:f3b19d36-7fd5-4205-a64b-e14a2069732b	PRJNA369475	SAMN06327304	Young BC	2017	29256859	WHM-2017-01-078	Yes		nose	colonising	0	3437					GCF_009912835.1	0	reads	2741520	413969520	151	148	94.42	90	2830322	145270	32.71
SRR5249929	MMMOSAM:ee125d05-f9b2-40a8-831e-99216772a621	PRJNA369475	SAMN06327335	Young BC	2017	29256859	WHM-2017-01-078			blood	invasive	0	3437		3	3	3	GCF_009912835.1	0	reads	2215672	334566472	151	119	94.54	90	2800296	149761	32.74
SRR5250002	MMMOSAM:dc1793ae-8131-4f1b-979b-08b3c9391d5c	PRJNA369475	SAMN06327408	Young BC	2017	29256859	WHM-2017-01-078			blood	invasive	0	3437		3	3	3	GCF_009912835.1	0	reads	2529142	381900442	151	136	94.26	89	2800176	149764	32.74
SRR5250011	MMMOSAM:da4f0bed-6836-4dd0-a131-60bd45407a08	PRJNA369475	SAMN06327417	Young BC	2017	29256859	WHM-2017-01-078			nose	colonising	0	3437		3	3	3	GCF_009912835.1	0	reads	1224048	184831248	151	66	94.7	101	2802063	150298	32.74
SRR5250443	MMMOSAM:7676f2c8-88e7-45a6-836e-6f3ae6c881ee	PRJNA369475	SAMN06327849	Young BC	2017	29256859	WHM-2017-01-078			nose	colonising	0	3437		0	0	0	GCF_009912835.1	0	reads	1671860	252450860	151	90	94.07	98	2831261	149764	32.71
SRR5250462	MMMOSAM:74ac8d21-5076-4264-a67c-dd8026bbcaca	PRJNA369475	SAMN06327868	Young BC	2017	29256859	WHM-2017-01-078			bone	invasive	13	3437		3	3	3	GCF_009912835.1	0	reads	1074040	162180040	151	58	95.59	101	2801111	149531	32.74
SRR5250510	MMMOSAM:69c9b4be-4847-404a-b99d-b81e87faa95f	PRJNA369475	SAMN06327916	Young BC	2017	29256859	WHM-2017-01-078			bone	invasive	13	3437		3	3	3	GCF_009912835.1	0	reads	1748142	263969442	151	94	95.16	95	2800913	145283	32.74
SRR5250631	MMMOSAM:52b0bf07-cf4c-480d-807e-cde933233f3b	PRJNA369475	SAMN06328037	Young BC	2017	29256859	WHM-2017-01-078			bone	invasive	13	3437		3	3	3	GCF_009912835.1	0	reads	1500798	226620498	151	81	95.16	98	2801484	150298	32.74
SRR5250661	MMMOSAM:4a61dfcc-885d-4f1e-a34f-46fccd4a8c5b	PRJNA369475	SAMN06328067	Young BC	2017	29256859	WHM-2017-01-078			blood	invasive	0	3437		4	4	3	GCF_009912835.1	0	reads	3273964	327396400	100	117	93.58	162	2800671	145183	32.78
SRR5251274	MMMOSAM:1f34bc3e-90d8-4e1f-b274-b76b5e57891e	PRJNA369475	SAMN06328644	Young BC	2017	29256859	WHM-2017-01-078			bone	invasive	13	3437		3	3	3	GCF_009912835.1	0	reads	2548858	384877558	151	138	95.23	96	2801262	150298	32.74
SRR5249986	MMMOSAM:e04cddb5-8c73-4d83-9398-2483e34fe8d5	PRJNA369475	SAMN06327392	Young BC	2017	29256859	WHM-2017-01-079	Yes		nose	colonising	0	8					GCF_009912915.1	0	reads	1577896	238262296	151	85	97.01	45	2759844	702120	32.64
SRR5249991	MMMOSAM:df614838-6860-4754-bc16-a6d8abfdf393	PRJNA369475	SAMN06327397	Young BC	2017	29256859	WHM-2017-01-079		Yes	blood	invasive	-1	8		3	3	3	GCF_009912915.1	0	reads	1563462	236082762	151	84	97.13	42	2758374	702120	32.64
SRR5250028	MMMOSAM:d658b902-2068-46c7-a8b5-54df07715c0a	PRJNA369475	SAMN06327434	Young BC	2017	29256859	WHM-2017-01-079			blood	invasive	-1	8		3	3	3	GCF_009912915.1	0	reads	1234276	186375676	151	66	97.37	57	2760707	1009727	32.63
SRR5250060	MMMOSAM:d0a1f700-9bd1-4ab2-9450-6dfeef5fe4d9	PRJNA369475	SAMN06327466	Young BC	2017	29256859	WHM-2017-01-079			blood	invasive	-1	8		3	3	3	GCF_009912915.1	0	reads	3622924	362292400	100	129	96.01	127	2764140	212104	32.67
SRR5250247	MMMOSAM:a5857b63-78bc-4972-9650-ba8c7c8a935f	PRJNA369475	SAMN06327653	Young BC	2017	29256859	WHM-2017-01-079			nose	colonising	0	8		2	2	2	GCF_009912915.1	0	reads	2585794	390454894	151	140	97.14	32	2758204	702120	32.63
SRR5250277	MMMOSAM:9f44bcd3-1655-4df6-8e0b-2f4da00ae3bb	PRJNA369475	SAMN06327683	Young BC	2017	29256859	WHM-2017-01-079			nose	colonising	0	8		1	1	1	GCF_009912915.1	0	reads	1573334	237573434	151	85	97.04	32	2758293	1031385	32.64
SRR5250327	MMMOSAM:9504f265-4809-47bb-9cea-dcead3913416	PRJNA369475	SAMN06327733	Young BC	2017	29256859	WHM-2017-01-079			nose	colonising	0	8		2	2	2	GCF_009912915.1	0	reads	1097144	165668744	151	59	97.35	33	2758325	702120	32.64
SRR5250480	MMMOSAM:70cb5c60-6ebb-4605-9945-8f84ca60de1c	PRJNA369475	SAMN06327886	Young BC	2017	29256859	WHM-2017-01-079			blood	invasive	-1	8		3	3	3	GCF_009912915.1	0	reads	3354382	506511682	151	181	97.18	26	2758338	1031385	32.64
SRR5250669	MMMOSAM:47f4931c-6041-4cb7-8cfb-43008e4bc767	PRJNA369475	SAMN06328075	Young BC	2017	29256859	WHM-2017-01-079			blood	invasive	-1	8		3	3	3	GCF_009912915.1	0	reads	1841958	278135658	151	99	96.86	27	2758450	1031385	32.64
SRR5251397	MMMOSAM:0496c3d8-a744-4565-97cc-91d7aa7e54ec	PRJNA369475	SAMN06328767	Young BC	2017	29256859	WHM-2017-01-079			nose	colonising	0	8		1	1	1	GCF_009912915.1	0	reads	2164162	326788462	151	117	97.3	56	2760687	511124	32.63
SRR5249907	MMMOSAM:f230c324-ec7c-4729-8522-1ccdb57d9455	PRJNA369475	SAMN06327313	Young BC	2017	29256859	WHM-2017-01-080			nose	colonising	0	30		26	24	22	GCF_003031425.1	0	reads	1151554	173884654	151	62	94.52	80	2841952	150886	32.74
SRR5250076	MMMOSAM:ce19034d-8450-4440-a2c0-78b393b77454	PRJNA369475	SAMN06327482	Young BC	2017	29256859	WHM-2017-01-080			blood	invasive	-4	30		12	11	11	GCF_003031425.1	0	reads	2140714	323247814	151	115	94.6	69	2841134	150886	32.74
SRR5250229	MMMOSAM:a912b20a-4cff-4ad5-87ab-960e7be97b19	PRJNA369475	SAMN06327635	Young BC	2017	29256859	WHM-2017-01-080			blood	invasive	-4	30		10	10	10	GCF_003031425.1	0	reads	1383252	208871052	151	74	94.03	79	2842421	150397	32.74
SRR5250361	MMMOSAM:8ba544a2-6670-431a-94e7-175c0ce4c820	PRJNA369475	SAMN06327767	Young BC	2017	29256859	WHM-2017-01-080			nose	colonising	0	30		27	27	27	GCF_003031425.1	0	reads	1378852	208206652	151	74	94.28	74	2841442	150886	32.74
SRR5250391	MMMOSAM:839abb20-432e-493c-af09-acf2720650b1	PRJNA369475	SAMN06327797	Young BC	2017	29256859	WHM-2017-01-080		Yes	blood	invasive	-4	30		12	10	10	GCF_003031425.1	0	reads	1158954	175002054	151	62	94.39	76	2842070	150886	32.74
SRR5250520	MMMOSAM:67b46d67-5ad8-4f80-bf80-050d381188fc	PRJNA369475	SAMN06327926	Young BC	2017	29256859	WHM-2017-01-080			blood	invasive	-4	30		11	11	11	GCF_003031425.1	0	reads	1882734	284292834	151	101	94.28	80	2842038	150886	32.74
SRR5250576	MMMOSAM:5cfd755f-08da-4fce-9487-ef51632abc40	PRJNA369475	SAMN06327982	Young BC	2017	29256859	WHM-2017-01-080			nose	colonising	0	30		29	27	26	GCF_003031425.1	0	reads	1473468	222493668	151	79	93.92	77	2841998	150886	32.74
SRR5250677	MMMOSAM:4679cb9f-03ea-4355-b0d7-5eab8bfff50a	PRJNA369475	SAMN06328083	Young BC	2017	29256859	WHM-2017-01-080			blood	invasive	-4	30		13	11	11	GCF_003031425.1	0	reads	3340092	504353892	151	180	93.85	79	2842453	150886	32.74
SRR5250797	MMMOSAM:2c24eb6d-8ef5-44e4-bd9f-93be45b524fa	PRJNA369475	SAMN06328203	Young BC	2017	29256859	WHM-2017-01-080	Yes		nose	colonising	0	30					GCF_003031425.1	0	reads	1542614	232934714	151	83	93.93	77	2842039	150886	32.74
SRR5250824	MMMOSAM:250262cb-8d6b-464f-93a0-adef6377d857	PRJNA369475	SAMN06328230	Young BC	2017	29256859	WHM-2017-01-080			nose	colonising	0	30		27	25	25	GCF_003031425.1	0	reads	1567738	236728438	151	84	94.28	80	2841885	170401	32.74
SRR5249856	MMMOSAM:fbb724ad-2108-4be2-9e2e-62509f90649f	PRJNA369475	SAMN06327262	Young BC	2017	29256859	WHM-2017-01-081			blood	invasive	0	789		4	4	4	GCF_009912355.1	0	reads	3677006	367700600	100	131	96.03	240	2752417	168784	32.79
SRR5250083	MMMOSAM:cc00d87c-0489-4b36-b74a-a6de1c1bd63d	PRJNA369475	SAMN06327489	Young BC	2017	29256859	WHM-2017-01-081		Yes	blood	invasive	0	789		4	4	4	GCF_009912355.1	0	reads	2869800	433339800	151	155	97.31	55	2740506	319098	32.72
SRR5250180	MMMOSAM:b45ec7ea-b7cb-46e0-92da-fc8d28d6729c	PRJNA369475	SAMN06327586	Young BC	2017	29256859	WHM-2017-01-081			nose	colonising	0	789		0	0	0	GCF_009912355.1	0	reads	1419354	214322454	151	76	97.22	75	2742879	319043	32.73
SRR5250301	MMMOSAM:9aea84d0-4034-49d0-aba9-cee0b6d948b9	PRJNA369475	SAMN06327707	Young BC	2017	29256859	WHM-2017-01-081			blood	invasive	0	789		4	4	4	GCF_009912355.1	0	reads	1571418	237284118	151	85	97.09	76	2742904	278928	32.73
SRR5250535	MMMOSAM:64f931b0-6c3e-4da1-bdc8-b1756f948ad4	PRJNA369475	SAMN06327941	Young BC	2017	29256859	WHM-2017-01-081			nose	colonising	0	789		0	0	0	GCF_009912355.1	0	reads	2936640	443432640	151	159	97.36	70	2742268	278928	32.73
SRR5250689	MMMOSAM:44433433-2c39-450e-93f4-ccd367227a21	PRJNA369475	SAMN06328095	Young BC	2017	29256859	WHM-2017-01-081			nose	colonising	0	789		0	0	0	GCF_009912355.1	0	reads	2585646	390432546	151	140	97.15	72	2742682	319436	32.73
SRR5250787	MMMOSAM:2e2a3be5-00fd-4980-b72e-fe173d334761	PRJNA369475	SAMN06328193	Young BC	2017	29256859	WHM-2017-01-081			nose	colonising	0	789		0	0	0	GCF_009912355.1	0	reads	1858476	280629876	151	100	96.94	84	2743912	278925	32.73
SRR5251261	MMMOSAM:21f78e88-0712-4a45-bef5-9a96b1f8e30b	PRJNA369475	SAMN06328631	Young BC	2017	29256859	WHM-2017-01-081			blood	invasive	0	789		4	4	4	GCF_009912355.1	0	reads	3085410	465896910	151	167	97.37	53	2740301	365460	32.72
SRR5251366	MMMOSAM:0e0aad98-4d76-4d66-87bb-01661c62e967	PRJNA369475	SAMN06328736	Young BC	2017	29256859	WHM-2017-01-081	Yes		nose	colonising	0	789					GCF_009912355.1	0	reads	1096438	165562138	151	59	97.45	68	2742235	319166	32.73
SRR5251413	MMMOSAM:01f6c174-f90d-41bc-af7b-4ffde403da1d	PRJNA369475	SAMN06328783	Young BC	2017	29256859	WHM-2017-01-081			blood	invasive	0	789		4	4	4	GCF_009912355.1	0	reads	2835342	428136642	151	153	97.29	64	2741335	278925	32.72
SRR5249895	MMMOSAM:f412342d-5f04-4f18-ae92-63dcee473939	PRJNA369475	SAMN06327301	Young BC	2017	29256859	WHM-2017-01-082	Yes		nose	colonising	0	54					GCF_009912635.1	0	reads	1853206	279834106	151	100	97.14	54	2704850	478809	32.8
SRR5249912	MMMOSAM:f1040fe1-95df-48a4-b62b-fadd73c74ad5	PRJNA369475	SAMN06327318	Young BC	2017	29256859	WHM-2017-01-082			nose	colonising	0	54		1	1	1	GCF_009912635.1	0	reads	1753244	264739844	151	94	97.06	61	2705556	478720	32.8
SRR5250041	MMMOSAM:d3785bae-611b-4804-ac34-2f665ad0f19f	PRJNA369475	SAMN06327447	Young BC	2017	29256859	WHM-2017-01-082			nose	colonising	0	54		0	0	0	GCF_009912635.1	0	reads	1331124	200999724	151	72	97.33	45	2703721	603457	32.79
SRR5250087	MMMOSAM:cac334b7-0a3f-4d3c-b1ab-5ab49e06a42a	PRJNA369475	SAMN06327493	Young BC	2017	29256859	WHM-2017-01-082			blood	invasive	0	54		0	0	0	GCF_009912635.1	0	reads	2792438	421658138	151	151	97.38	40	2702825	603457	32.79
SRR5250181	MMMOSAM:b40584b2-366c-46cc-9ace-81a62dbfc226	PRJNA369475	SAMN06327587	Young BC	2017	29256859	WHM-2017-01-082		Yes	blood	invasive	0	54		0	0	0	GCF_009912635.1	0	reads	3555236	355523600	100	127	96.46	148	2711570	235730	32.83
SRR5250348	MMMOSAM:8eeb6d9d-ab08-4645-878b-d9e76769bf24	PRJNA369475	SAMN06327754	Young BC	2017	29256859	WHM-2017-01-082			blood	invasive	0	54		0	0	0	GCF_009912635.1	0	reads	1405124	212173724	151	76	97.26	47	2703959	603457	32.79
SRR5250545	MMMOSAM:62657df2-7c9d-421b-9513-4f8907971f84	PRJNA369475	SAMN06327951	Young BC	2017	29256859	WHM-2017-01-082			nose	colonising	0	54		2	2	2	GCF_009912635.1	0	reads	1225386	185033286	151	66	97.33	50	2704429	603401	32.79
SRR5250743	MMMOSAM:386c5985-9839-4dc7-a9bd-11abbaaf847e	PRJNA369475	SAMN06328149	Young BC	2017	29256859	WHM-2017-01-082			blood	invasive	0	54		0	0	0	GCF_009912635.1	0	reads	1342902	202778202	151	72	97.38	49	2704114	467934	32.79
SRR5251280	MMMOSAM:1eae9bee-eaf6-4455-804c-d2af82159b92	PRJNA369475	SAMN06328650	Young BC	2017	29256859	WHM-2017-01-082			blood	invasive	0	54		0	0	0	GCF_009912635.1	0	reads	1240818	187363518	151	67	97.35	54	2704564	478832	32.79
SRR5250136	MMMOSAM:bed04888-f0df-4b78-aac7-7fd04941860c	PRJNA369475	SAMN06327542	Young BC	2017	29256859	WHM-2017-01-083	Yes		nose	colonising	0	30					GCF_003354625.1	0	reads	3143388	474651588	151	170	97.67	56	2721598	171313	32.7
SRR5250347	MMMOSAM:8f673a80-4b31-418d-864e-d3c5bc8fdf58	PRJNA369475	SAMN06327753	Young BC	2017	29256859	WHM-2017-01-083			nose	colonising	0	30		2	0	0	GCF_003354625.1	0	reads	3779606	570720506	151	204	97.68	58	2721848	171313	32.7
SRR5250451	MMMOSAM:75f29c33-d15f-4d21-a979-e5d7363cf99e	PRJNA369475	SAMN06327857	Young BC	2017	29256859	WHM-2017-01-083			nose	colonising	0	30		0	0	0	GCF_003354625.1	0	reads	3124020	471727020	151	169	97.79	60	2721956	171313	32.69
SRR5250640	MMMOSAM:504e62f8-c17f-4f00-bada-902b88aa28b7	PRJNA369475	SAMN06328046	Young BC	2017	29256859	WHM-2017-01-083			nose	colonising	0	30		1	0	0	GCF_003354625.1	0	reads	3373692	509427492	151	182	97.68	55	2721374	171313	32.7
SRR5250668	MMMOSAM:4827342d-1064-41eb-b152-8c6c9baa9308	PRJNA369475	SAMN06328074	Young BC	2017	29256859	WHM-2017-01-083			nose	colonising	0	30		1	1	1	GCF_003354625.1	0	reads	2519556	380452956	151	136	97.93	56	2721395	171313	32.7
SRR5249841	MMMOSAM:fe914d0b-03f6-4297-925f-418e8a9b94c1	PRJNA369475	SAMN06327247	Young BC	2017	29256859	WHM-2017-01-084			bone	invasive	1	-		0	0	0	GCF_009912815.1	0	reads	2968522	448246822	151	160	96.38	35	2719240	938680	32.84
SRR5249993	MMMOSAM:deb31be4-6cef-48b6-b6ee-013ca0e08402	PRJNA369475	SAMN06327399	Young BC	2017	29256859	WHM-2017-01-084			nose	colonising	0	-		0	0	0	GCF_009912815.1	0	reads	3267576	493403976	151	176	96.33	31	2718795	938680	32.84
SRR5250093	MMMOSAM:ca394c71-9180-46a1-839a-0e9272f3318a	PRJNA369475	SAMN06327499	Young BC	2017	29256859	WHM-2017-01-084			nose	colonising	0	-		0	0	0	GCF_009912815.1	0	reads	1609414	243021514	151	87	96.35	42	2720133	938680	32.84
SRR5250157	MMMOSAM:bb03edb4-3e45-4008-920a-9237d4d749e7	PRJNA369475	SAMN06327563	Young BC	2017	29256859	WHM-2017-01-084			nose	colonising	0	-		0	0	0	GCF_009912815.1	0	reads	1492702	225398002	151	80	96.32	39	2719888	938680	32.84
SRR5250161	MMMOSAM:ba451aa0-828c-4166-937c-36c1f44e41db	PRJNA369475	SAMN06327567	Young BC	2017	29256859	WHM-2017-01-084			bone	invasive	1	-		0	0	0	GCF_009912815.1	0	reads	3483160	525957160	151	188	96.47	32	2718892	938680	32.83
SRR5250186	MMMOSAM:b3155e05-6f3a-4693-bc91-da73825a1c18	PRJNA369475	SAMN06327592	Young BC	2017	29256859	WHM-2017-01-084		Yes	bone	invasive	1	-		0	0	0	GCF_009912815.1	0	reads	1318456	199086856	151	71	96.35	41	2720137	938680	32.84
SRR5250198	MMMOSAM:b0128e67-1fec-417e-860d-915246c314a9	PRJNA369475	SAMN06327604	Young BC	2017	29256859	WHM-2017-01-084			bone	invasive	1	-		0	0	0	GCF_009912815.1	0	reads	1141050	172298550	151	61	96.55	37	2719521	938680	32.84
SRR5250808	MMMOSAM:299e240f-9813-46ff-b3d1-1a24f403cd76	PRJNA369475	SAMN06328214	Young BC	2017	29256859	WHM-2017-01-084			nose	colonising	0	-		0	0	0	GCF_009912815.1	0	reads	1698040	256404040	151	91	96.26	34	2719227	938680	32.84
SRR5251330	MMMOSAM:1560d7fd-6299-4aa0-922f-38d0438c25f6	PRJNA369475	SAMN06328700	Young BC	2017	29256859	WHM-2017-01-084	Yes		nose	colonising	0	-					GCF_009912815.1	0	reads	1638360	247392360	151	88	96.3	37	2719631	938680	32.84
SRR5251400	MMMOSAM:04120a02-fd72-4032-b6ac-ce5c26c03314	PRJNA369475	SAMN06328770	Young BC	2017	29256859	WHM-2017-01-084			bone	invasive	1	-		0	0	0	GCF_009912815.1	0	reads	1734354	261887454	151	93	96.3	46	2720738	938680	32.84
SRR5250004	MMMOSAM:db8e4cf3-9762-49af-91d3-7c0e960fa29d	PRJNA369475	SAMN06327410	Young BC	2017	29256859	WHM-2017-01-085			skin	invasive	0	30		3	2	2	GCF_013467165.1	0	reads	3008960	454352960	151	162	93.78	79	2889551	140059	32.76
SRR5250171	MMMOSAM:b73059ef-0368-4e1b-80de-51f996f1ee1c	PRJNA369475	SAMN06327577	Young BC	2017	29256859	WHM-2017-01-085		Yes	skin	invasive	0	30		3	2	2	GCF_013467165.1	0	reads	1247690	188401190	151	67	93.74	86	2891103	150393	32.76
SRR5250221	MMMOSAM:ab167301-4155-4559-9ca9-e1e1486f2785	PRJNA369475	SAMN06327627	Young BC	2017	29256859	WHM-2017-01-085			skin	invasive	0	30		2	2	2	GCF_013467165.1	0	reads	1516288	228959488	151	82	93.51	82	2889901	150393	32.76
SRR5250386	MMMOSAM:84834ced-df05-474f-bbc6-77d80923b584	PRJNA369475	SAMN06327792	Young BC	2017	29256859	WHM-2017-01-085			skin	invasive	0	30		2	2	2	GCF_013467165.1	0	reads	2661060	401820060	151	144	93.95	77	2890077	150885	32.76
SRR5250431	MMMOSAM:79593526-fdc9-4e90-a6df-ea452e08abeb	PRJNA369475	SAMN06327837	Young BC	2017	29256859	WHM-2017-01-085			nose	colonising	0	30		4	3	3	GCF_013467165.1	0	reads	1207952	182400752	151	65	93.9	85	2889977	150393	32.76
SRR5250471	MMMOSAM:7232d308-237f-464b-8599-6202d703336b	PRJNA369475	SAMN06327877	Young BC	2017	29256859	WHM-2017-01-085			skin	invasive	0	30		4	2	2	GCF_013467165.1	0	reads	1656994	250206094	151	89	93.69	89	2889911	150393	32.76
SRR5250548	MMMOSAM:61e2e3ca-c6b4-4987-a6cb-6ca3016c1957	PRJNA369475	SAMN06327954	Young BC	2017	29256859	WHM-2017-01-085			nose	colonising	0	30		9	7	7	GCF_013467165.1	0	reads	1664890	251398390	151	90	93.72	85	2887429	150393	32.76
SRR5250698	MMMOSAM:4231a830-d814-4eaa-b28d-7e19fdc72576	PRJNA369475	SAMN06328104	Young BC	2017	29256859	WHM-2017-01-085			nose	colonising	0	30		2	0	0	GCF_013467165.1	0	reads	1634830	246859330	151	88	93.22	83	2889723	140059	32.76
SRR5251361	MMMOSAM:0eb79817-c26c-4a5d-aebd-d9d19ae64301	PRJNA369475	SAMN06328731	Young BC	2017	29256859	WHM-2017-01-085	Yes		nose	colonising	0	30					GCF_013467165.1	0	reads	2726340	411677340	151	147	93.83	73	2889411	150883	32.76
SRR5251409	MMMOSAM:029f4aae-ae6a-461b-8d03-dee18d879fac	PRJNA369475	SAMN06328779	Young BC	2017	29256859	WHM-2017-01-085			nose	colonising	0	30		2	2	2	GCF_013467165.1	0	reads	1772744	267684344	151	95	93.77	86	2889590	150393	32.76
SRR5249974	MMMOSAM:e282b2e1-4dbd-4462-85d5-3b7be3c54360	PRJNA369475	SAMN06327380	Young BC	2017	29256859	WHM-2017-01-086			nose	colonising	0	2255		5	0	0	GCF_001611405.1	0	reads	1570676	237172076	151	85	97.08	58	2715264	249927	32.75
SRR5250192	MMMOSAM:b1109fcd-7fac-496a-81d0-6faaecf3f760	PRJNA369475	SAMN06327598	Young BC	2017	29256859	WHM-2017-01-086			blood	invasive	0	2255		11	9	9	GCF_001611405.1	0	reads	2705700	408560700	151	146	97.14	51	2714687	281171	32.75
SRR5250292	MMMOSAM:9be9c555-6309-4d69-817d-374df7978161	PRJNA369475	SAMN06327698	Young BC	2017	29256859	WHM-2017-01-086			blood	invasive	0	2255		14	9	9	GCF_001611405.1	0	reads	1377050	207934550	151	74	97.07	57	2715453	281171	32.75
SRR5250351	MMMOSAM:8d402940-7bc9-49bb-bb74-c6141cbb7174	PRJNA369475	SAMN06327757	Young BC	2017	29256859	WHM-2017-01-086			blood	invasive	0	2255		14	9	9	GCF_001611405.1	0	reads	1950510	294527010	151	105	96.8	53	2714433	255058	32.75
SRR5250710	MMMOSAM:3eb74683-bf45-4dcd-ab8b-1baffc361035	PRJNA369475	SAMN06328116	Young BC	2017	29256859	WHM-2017-01-086	Yes		nose	colonising	0	2255					GCF_001611405.1	0	reads	1041906	157327806	151	56	97.37	57	2715258	281094	32.75
SRR5251311	MMMOSAM:199ba07d-0532-4159-bc97-e5f0408cc333	PRJNA369475	SAMN06328681	Young BC	2017	29256859	WHM-2017-01-086		Yes	blood	invasive	0	2255		14	9	9	GCF_001611405.1	0	reads	3269666	493719566	151	177	97.16	56	2714785	249927	32.75
SRR5251355	MMMOSAM:0fc3a631-37b1-4691-8f4d-c93cf4591e27	PRJNA369475	SAMN06328725	Young BC	2017	29256859	WHM-2017-01-086			nose	colonising	0	2255		10	5	5	GCF_001611405.1	0	reads	1734356	261887756	151	93	96.86	50	2714504	255060	32.75
SRR5251405	MMMOSAM:03487f84-db96-4067-8f92-cf7e208f956c	PRJNA369475	SAMN06328775	Young BC	2017	29256859	WHM-2017-01-086			blood	invasive	0	2255		14	9	9	GCF_001611405.1	0	reads	1655084	249917684	151	89	96.62	67	2716548	243829	32.76
SRR5249888	MMMOSAM:f521fc12-845e-4920-9f5a-6f8b5ebdeea0	PRJNA369475	SAMN06327294	Young BC	2017	29256859	WHM-2017-01-087			nose	colonising	0	1		0	0	0	GCF_001879545.1	0	reads	1409620	212852620	151	76	97.75	27	2748777	1395283	32.68
SRR5250294	MMMOSAM:9b9c192e-e318-4a3a-ab3a-99325c91cb1d	PRJNA369475	SAMN06327700	Young BC	2017	29256859	WHM-2017-01-087			blood	invasive	1	1		0	0	0	GCF_001879545.1	0	reads	2906590	438895090	151	157	96.62	30	2791998	731277	32.69
SRR5250328	MMMOSAM:94b7ece5-711c-4283-bd1c-1bb44cd815ea	PRJNA369475	SAMN06327734	Young BC	2017	29256859	WHM-2017-01-087			nose	colonising	0	1		0	0	0	GCF_001879545.1	0	reads	1872090	282685590	151	101	97.5	28	2748706	730342	32.68
SRR5250406	MMMOSAM:7f4a691d-3ad8-4c43-a8fb-09fa7310cc68	PRJNA369475	SAMN06327812	Young BC	2017	29256859	WHM-2017-01-087			blood	invasive	1	1		0	0	0	GCF_001879545.1	0	reads	3268320	493516320	151	176	96.78	23	2790453	1395442	32.68
SRR5250421	MMMOSAM:7c93bc1b-b0aa-4bb9-adc5-afe44db066c6	PRJNA369475	SAMN06327827	Young BC	2017	29256859	WHM-2017-01-087		Yes	blood	invasive	1	1		0	0	0	GCF_001879545.1	0	reads	1819540	274750540	151	98	96.54	25	2790704	730253	32.68
SRR5250500	MMMOSAM:6bc26b62-3ef9-4de1-bb3c-488869a628d2	PRJNA369475	SAMN06327906	Young BC	2017	29256859	WHM-2017-01-087			blood	invasive	1	1		0	0	0	GCF_001879545.1	0	reads	1592302	240437602	151	86	96.66	31	2792109	577958	32.68
SRR5250579	MMMOSAM:5c444e95-c871-4f7a-9b73-f618261c2ae3	PRJNA369475	SAMN06327985	Young BC	2017	29256859	WHM-2017-01-087			nose	colonising	0	1		0	0	0	GCF_001879545.1	0	reads	1853212	279835012	151	100	97.44	25	2748634	730253	32.68
SRR5250618	MMMOSAM:55157b03-f60d-48ee-b91b-814c76ba503f	PRJNA369475	SAMN06328024	Young BC	2017	29256859	WHM-2017-01-087			blood	invasive	1	1		0	0	0	GCF_001879545.1	0	reads	1703760	257267760	151	92	96.87	30	2791836	730870	32.68
SRR5250709	MMMOSAM:3ebb076b-c612-4005-bf25-121cc59f0de0	PRJNA369475	SAMN06328115	Young BC	2017	29256859	WHM-2017-01-087			nose	colonising	0	1		0	0	0	GCF_001879545.1	0	reads	1443474	217964574	151	78	97.54	36	2729354	1395442	32.71
SRR5251265	MMMOSAM:21256aea-97b7-4315-8ad9-0e861cb17a2a	PRJNA369475	SAMN06328635	Young BC	2017	29256859	WHM-2017-01-087	Yes		nose	colonising	0	1					GCF_001879545.1	0	reads	1173704	177229304	151	63	97.67	41	2750348	730486	32.68
SRR5249900	MMMOSAM:f32df08f-4a40-4361-af04-b0cbfed41c4e	PRJNA369475	SAMN06327306	Young BC	2017	29256859	WHM-2017-01-088			nose	colonising	0	188		0	0	0	GCF_003573855.1	0	reads	1728362	260982662	151	93	96.02	55	2758254	632110	32.76
SRR5250038	MMMOSAM:d3cb7000-97d1-4033-84a2-4015362bc2ec	PRJNA369475	SAMN06327444	Young BC	2017	29256859	WHM-2017-01-088			nose	colonising	0	188		0	0	0	GCF_003573855.1	0	reads	1628814	245950914	151	88	96.39	40	2757104	632110	32.75
SRR5250088	MMMOSAM:cab797cb-550e-4ef2-a413-112f54920705	PRJNA369475	SAMN06327494	Young BC	2017	29256859	WHM-2017-01-088			nose	colonising	0	188		0	0	0	GCF_003573855.1	0	reads	1641360	247845360	151	88	96.21	48	2757337	632110	32.76
SRR5250312	MMMOSAM:988e4517-64ae-48eb-a7a8-20dd1989c9e6	PRJNA369475	SAMN06327718	Young BC	2017	29256859	WHM-2017-01-088			skin	invasive	-1	188		1	1	1	GCF_003573855.1	0	reads	3001274	453192374	151	162	96.58	52	2758015	632110	32.76
SRR5250491	MMMOSAM:6dede366-b558-4913-ab2f-b6cb07700e09	PRJNA369475	SAMN06327897	Young BC	2017	29256859	WHM-2017-01-088			skin	invasive	-1	188		1	1	1	GCF_003573855.1	0	reads	1463732	221023532	151	79	96.53	43	2757105	632110	32.76
SRR5250768	MMMOSAM:30e82210-1770-4e82-8b0c-c0102efac41f	PRJNA369475	SAMN06328174	Young BC	2017	29256859	WHM-2017-01-088			skin	invasive	-1	188		1	1	1	GCF_003573855.1	0	reads	1527406	230638306	151	82	96.34	49	2757591	632110	32.76
SRR5250780	MMMOSAM:2f52c75d-7696-40e4-bf12-8c7395d6bdeb	PRJNA369475	SAMN06328186	Young BC	2017	29256859	WHM-2017-01-088	Yes		nose	colonising	0	188					GCF_003573855.1	0	reads	1582736	238993136	151	85	96.35	42	2757011	632110	32.76
SRR5250789	MMMOSAM:2d8bb1cc-584d-4016-acf8-e9df72469f6b	PRJNA369475	SAMN06328195	Young BC	2017	29256859	WHM-2017-01-088			nose	colonising	0	188		0	0	0	GCF_003573855.1	0	reads	3397116	512964516	151	183	96.13	50	2757558	632110	32.76
SRR5251395	MMMOSAM:04f7a649-9d66-4e16-8bbf-e38456e07804	PRJNA369475	SAMN06328765	Young BC	2017	29256859	WHM-2017-01-088			skin	invasive	-1	188		1	1	1	GCF_003573855.1	0	reads	1588146	239810046	151	85	96.35	51	2757506	632110	32.75
SRR5251410	MMMOSAM:028d2145-ab90-4682-9a75-1c7e5954ff03	PRJNA369475	SAMN06328780	Young BC	2017	29256859	WHM-2017-01-088		Yes	skin	invasive	-1	188		1	1	1	GCF_003573855.1	0	reads	2994436	452159836	151	162	96.47	52	2758077	632110	32.76
SRR5250213	MMMOSAM:ac65b8eb-2f46-4244-9c0a-66893584adc3	PRJNA369475	SAMN06327619	Young BC	2017	29256859	WHM-2017-01-089			skin	invasive	0	5		7	7	7	GCF_003203655.1	0	reads	1211362	182915662	151	65	97.58	43	2690958	696205	32.77
SRR5250345	MMMOSAM:8fad5afd-7edc-4780-810c-5c14e7b7198d	PRJNA369475	SAMN06327751	Young BC	2017	29256859	WHM-2017-01-089			nose	colonising	0	5		4	4	4	GCF_003203655.1	0	reads	1345058	203103758	151	72	97.89	48	2690875	696291	32.77
SRR5250353	MMMOSAM:8d26178a-322c-4622-b542-44d0dc137d31	PRJNA369475	SAMN06327759	Young BC	2017	29256859	WHM-2017-01-089			nose	colonising	0	5		4	4	4	GCF_003203655.1	0	reads	1688008	254889208	151	91	97.24	52	2692003	547784	32.77
SRR5250389	MMMOSAM:83bbef42-2fd0-4565-85fe-46f865f23b32	PRJNA369475	SAMN06327795	Young BC	2017	29256859	WHM-2017-01-089		Yes	skin	invasive	0	5		7	7	7	GCF_003203655.1	0	reads	1780722	268889022	151	96	97.75	44	2690973	765417	32.77
SRR5250522	MMMOSAM:6786d793-d173-4566-9cd3-eb3dc41b5485	PRJNA369475	SAMN06327928	Young BC	2017	29256859	WHM-2017-01-089			nose	colonising	0	5		4	4	4	GCF_003203655.1	0	reads	3543336	535043736	151	191	97.48	48	2690875	696291	32.77
SRR5250555	MMMOSAM:61179ffb-3769-4769-8ccd-d0808fd6b441	PRJNA369475	SAMN06327961	Young BC	2017	29256859	WHM-2017-01-089	Yes		nose	colonising	0	5					GCF_003203655.1	0	reads	2412390	364270890	151	130	97.73	49	2691509	740295	32.77
SRR5250699	MMMOSAM:41dbb7d0-a99e-4725-b10a-37a1ac8a2520	PRJNA369475	SAMN06328105	Young BC	2017	29256859	WHM-2017-01-089			skin	invasive	0	5		7	7	7	GCF_003203655.1	0	reads	2062822	311486122	151	111	97.62	43	2690894	765414	32.77
SRR5250783	MMMOSAM:2f135c55-db98-4c8c-bda4-274a23febe5c	PRJNA369475	SAMN06328189	Young BC	2017	29256859	WHM-2017-01-089			nose	colonising	0	5		4	4	4	GCF_003203655.1	0	reads	1624762	245339062	151	87	97.43	46	2690917	697351	32.77
SRR5250791	MMMOSAM:2d773a14-0b76-4a33-a10b-6b1b69b29c04	PRJNA369475	SAMN06328197	Young BC	2017	29256859	WHM-2017-01-089			skin	invasive	0	5		7	7	7	GCF_003203655.1	0	reads	1664292	251308092	151	90	97.6	55	2692320	300147	32.77
SRR5251313	MMMOSAM:1976478e-231c-401e-80c8-3e41caad7364	PRJNA369475	SAMN06328683	Young BC	2017	29256859	WHM-2017-01-089			skin	invasive	0	5		7	7	7	GCF_003203655.1	0	reads	1612208	243443408	151	87	97.46	42	2690941	765414	32.77
SRR5249953	MMMOSAM:e64112f7-a4b0-4626-b3a9-f12eda11f942	PRJNA369475	SAMN06327359	Young BC	2017	29256859	WHM-2017-01-090			nose	colonising	0	8		9	6	6	GCF_004193895.1	0	reads	4663388	466338800	100	167	96.74	156	2740323	283304	32.73
SRR5250077	MMMOSAM:cd6a3a80-33ad-475d-ad96-46e7d0dd7847	PRJNA369475	SAMN06327483	Young BC	2017	29256859	WHM-2017-01-090			nose	colonising	0	8		4	1	1	GCF_004193895.1	0	reads	3517836	351783600	100	126	96.76	117	2739121	394265	32.74
SRR5250145	MMMOSAM:bd658a57-11ab-420d-a628-6c9b9b3f2de5	PRJNA369475	SAMN06327551	Young BC	2017	29256859	WHM-2017-01-090		Yes	skin	invasive	2	8		79	77	77	GCF_004193895.1	0	reads	3010162	301016200	100	107	96.76	146	2742762	305390	32.73
SRR5250212	MMMOSAM:ac786f01-69e0-4c1f-a289-be2487ed2ada	PRJNA369475	SAMN06327618	Young BC	2017	29256859	WHM-2017-01-090			nose	colonising	0	8		3	2	2	GCF_004193895.1	0	reads	2816026	281602600	100	100	96.75	132	2739108	283316	32.74
SRR5250224	MMMOSAM:aa44e632-276f-435c-a523-e5eff6d62b34	PRJNA369475	SAMN06327630	Young BC	2017	29256859	WHM-2017-01-090			skin	invasive	2	8		83	80	78	GCF_004193895.1	0	reads	4176544	417654400	100	149	96.72	143	2742323	305390	32.73
SRR5250250	MMMOSAM:a5564a3d-159b-4ca4-811c-e02a3e7c9df7	PRJNA369475	SAMN06327656	Young BC	2017	29256859	WHM-2017-01-090			nose	colonising	0	8		9	6	6	GCF_004193895.1	0	reads	3765036	376503600	100	135	96.81	144	2740007	326314	32.73
SRR5250297	MMMOSAM:9b4c742e-7201-49d9-922f-0bee28a3cc4c	PRJNA369475	SAMN06327703	Young BC	2017	29256859	WHM-2017-01-090			nose	colonising	0	8		3	1	1	GCF_004193895.1	0	reads	2991378	299137800	100	107	96.75	148	2738933	283316	32.74
SRR5250452	MMMOSAM:75edc11c-4b61-4299-a2b3-952f8c8acea7	PRJNA369475	SAMN06327858	Young BC	2017	29256859	WHM-2017-01-090			nose	colonising	0	8		9	6	6	GCF_004193895.1	0	reads	3678866	367886600	100	131	96.76	148	2740181	315545	32.73
SRR5250485	MMMOSAM:7063f20e-9216-4ee2-aeb7-103b11a349b7	PRJNA369475	SAMN06327891	Young BC	2017	29256859	WHM-2017-01-090			nose	colonising	0	8		4	1	1	GCF_004193895.1	0	reads	3596288	359628800	100	128	96.65	163	2740945	305270	32.73
SRR5250523	MMMOSAM:67587d54-cea9-4059-9428-f2f8138edf6f	PRJNA369475	SAMN06327929	Young BC	2017	29256859	WHM-2017-01-090			nose	colonising	0	8		9	6	6	GCF_004193895.1	0	reads	3040082	304008200	100	109	96.57	160	2741128	283351	32.73
SRR5250561	MMMOSAM:5f933f47-99e2-4bb3-b789-bc4daf42c609	PRJNA369475	SAMN06327967	Young BC	2017	29256859	WHM-2017-01-090			nose	colonising	0	8		4	1	1	GCF_004193895.1	0	reads	3795660	379566000	100	136	96.67	158	2742646	280572	32.73
SRR5250625	MMMOSAM:53b208d6-0e1d-40ed-ba2f-cf062849c47e	PRJNA369475	SAMN06328031	Young BC	2017	29256859	WHM-2017-01-090			skin	invasive	2	8		80	77	77	GCF_004193895.1	0	reads	2785966	278596600	100	99	96.68	149	2742968	267015	32.73
SRR5250654	MMMOSAM:4cc8dcfc-89d2-4fbe-8ceb-5a1f64530239	PRJNA369475	SAMN06328060	Young BC	2017	29256859	WHM-2017-01-090			skin	invasive	2	8		79	76	74	GCF_004193895.1	0	reads	3415278	341527800	100	122	97.01	149	2742904	138802	32.71
SRR5250682	MMMOSAM:464bad00-6557-49c6-b961-6c1af0a4ba33	PRJNA369475	SAMN06328088	Young BC	2017	29256859	WHM-2017-01-090			skin	invasive	2	8		80	77	77	GCF_004193895.1	0	reads	3573980	357398000	100	128	96.65	151	2743204	305271	32.73
SRR5250753	MMMOSAM:3476b3e3-2305-47b7-907a-3cae388d2584	PRJNA369475	SAMN06328159	Young BC	2017	29256859	WHM-2017-01-090			skin	invasive	2	8		73	71	68	GCF_004193895.1	0	reads	3762782	376278200	100	134	96.74	175	2746229	158976	32.73
SRR5250759	MMMOSAM:33202365-d4e8-4518-8157-027f9e77da41	PRJNA369475	SAMN06328165	Young BC	2017	29256859	WHM-2017-01-090			skin	invasive	2	8		82	79	79	GCF_004193895.1	0	reads	3633004	363300400	100	130	96.7	129	2741833	286424	32.72
SRR5250772	MMMOSAM:3071b562-b9e6-4834-bb6d-98d21a2baa63	PRJNA369475	SAMN06328178	Young BC	2017	29256859	WHM-2017-01-090			skin	invasive	2	8		66	63	63	GCF_004193895.1	0	reads	4021050	402105000	100	144	96.71	155	2743411	286463	32.73
SRR5251282	MMMOSAM:1e5c889d-1253-460e-88b6-de617375cd73	PRJNA369475	SAMN06328652	Young BC	2017	29256859	WHM-2017-01-090	Yes		nose	colonising	0	8					GCF_004193895.1	0	reads	3361524	336152400	100	120	96.79	136	2739276	305270	32.74
SRR5251373	MMMOSAM:0caeede0-21f1-45c6-b801-a7ed95abd6f4	PRJNA369475	SAMN06328743	Young BC	2017	29256859	WHM-2017-01-090			skin	invasive	2	8		74	73	70	GCF_004193895.1	0	reads	3356246	335624600	100	120	96.64	244	2872004	105798	32.61
SRR5249893	MMMOSAM:f46cad8d-c47a-4a8d-ad48-bc722777b5a9	PRJNA369475	SAMN06327299	Young BC	2017	29256859	WHM-2017-01-091			skin	invasive	0	573		0	0	0	GCF_005707335.1	0	reads	4238146	423814600	100	151	96.2	309	2955632	51582	32.59
SRR5249915	MMMOSAM:f054b911-a4cc-4d7e-9086-ea85814e8ca6	PRJNA369475	SAMN06327321	Young BC	2017	29256859	WHM-2017-01-091			skin	invasive	0	573		0	0	0	GCF_005707335.1	0	reads	4464114	446411400	100	160	96.12	139	2744495	147623	32.73
SRR5249919	MMMOSAM:efbb410b-f256-45b0-919f-6b84433285aa	PRJNA369475	SAMN06327325	Young BC	2017	29256859	WHM-2017-01-091			nose	colonising	0	573		0	0	0	GCF_005707335.1	0	reads	3322612	332261200	100	119	95.95	142	2743317	170998	32.73
SRR5250065	MMMOSAM:cfa39bbc-ea56-492b-8a9e-52175ad0ffeb	PRJNA369475	SAMN06327471	Young BC	2017	29256859	WHM-2017-01-091			skin	invasive	0	573		0	0	0	GCF_005707335.1	0	reads	3738270	373827000	100	134	96.16	165	2744644	149071	32.74
SRR5250118	MMMOSAM:c4a0abbc-7e29-45c5-a309-a4cce8f72d6f	PRJNA369475	SAMN06327524	Young BC	2017	29256859	WHM-2017-01-091			skin	invasive	0	573		0	0	0	GCF_005707335.1	0	reads	3609852	360985200	100	129	96.12	138	2743637	149071	32.73
SRR5250122	MMMOSAM:c3ef416f-746f-4fbb-ac1e-8984b46c3ba7	PRJNA369475	SAMN06327528	Young BC	2017	29256859	WHM-2017-01-091			nose	colonising	0	573		0	0	0	GCF_005707335.1	0	reads	2750298	275029800	100	98	96.2	146	2743290	148889	32.74
SRR5250187	MMMOSAM:b305df63-259b-4728-9322-500536785074	PRJNA369475	SAMN06327593	Young BC	2017	29256859	WHM-2017-01-091			skin	invasive	0	573		0	0	0	GCF_005707335.1	0	reads	2774512	277451200	100	99	95.56	199	2791666	126248	32.72
SRR5250201	MMMOSAM:af4251d8-dfdb-4f40-9f78-46faaa734767	PRJNA369475	SAMN06327607	Young BC	2017	29256859	WHM-2017-01-091			nose	colonising	0	573		0	0	0	GCF_005707335.1	0	reads	3278612	327861200	100	117	96.22	142	2742908	147623	32.74
SRR5250216	MMMOSAM:abad6be8-5363-4ed8-9fdf-a026efc1b300	PRJNA369475	SAMN06327622	Young BC	2017	29256859	WHM-2017-01-091			nose	colonising	0	573		0	0	0	GCF_005707335.1	0	reads	4841148	484114800	100	173	96.21	140	2746222	149022	32.73
SRR5250252	MMMOSAM:a4d476d4-67c2-487f-9bb3-ca249870e980	PRJNA369475	SAMN06327658	Young BC	2017	29256859	WHM-2017-01-091			nose	colonising	0	573		0	0	0	GCF_005707335.1	0	reads	3768656	376865600	100	135	96.23	147	2743242	170922	32.73
SRR5250372	MMMOSAM:880aeb5a-1b37-4e25-ab88-da3e995e430b	PRJNA369475	SAMN06327778	Young BC	2017	29256859	WHM-2017-01-091			nose	colonising	0	573		0	0	0	GCF_005707335.1	0	reads	3349280	334928000	100	120	96.23	135	2742249	149071	32.73
SRR5250375	MMMOSAM:87192003-4320-4a35-adbd-e78232ab8440	PRJNA369475	SAMN06327781	Young BC	2017	29256859	WHM-2017-01-091			nose	colonising	0	573		0	0	0	GCF_005707335.1	0	reads	4059204	405920400	100	145	95.9	135	2742507	147393	32.72
SRR5250440	MMMOSAM:78205467-d8b3-4736-a1be-49202e702a28	PRJNA369475	SAMN06327846	Young BC	2017	29256859	WHM-2017-01-091			skin	invasive	0	573		0	0	0	GCF_005707335.1	0	reads	3644550	364455000	100	130	95.49	162	2744714	148924	32.74
SRR5250459	MMMOSAM:750a7bc0-8e2b-4a32-a301-be4a3449a67b	PRJNA369475	SAMN06327865	Young BC	2017	29256859	WHM-2017-01-091			nose	colonising	0	573		0	0	0	GCF_005707335.1	0	reads	3174356	317435600	100	113	96.19	146	2743394	148952	32.73
SRR5250463	MMMOSAM:74a899c6-2869-4cd9-bd59-9bb7e97f0077	PRJNA369475	SAMN06327869	Young BC	2017	29256859	WHM-2017-01-091			nose	colonising	0	573		0	0	0	GCF_005707335.1	0	reads	3922728	392272800	100	140	95.75	121	2741997	182296	32.73
SRR5250528	MMMOSAM:6664c3cb-2eba-450c-af96-aba25802c1d5	PRJNA369475	SAMN06327934	Young BC	2017	29256859	WHM-2017-01-091	Yes		nose	colonising	0	573					GCF_005707335.1	0	reads	3302708	330270800	100	118	95.92	146	2743503	148907	32.74
SRR5250612	MMMOSAM:55e78c52-8b72-4bac-a213-0f73c3dc115d	PRJNA369475	SAMN06328018	Young BC	2017	29256859	WHM-2017-01-091			skin	invasive	0	573		1	1	1	GCF_005707335.1	0	reads	3077332	307733200	100	110	96.17	136	2748474	147668	32.71
SRR5250620	MMMOSAM:5483d145-bbb3-4f94-b142-65c9e435d1ea	PRJNA369475	SAMN06328026	Young BC	2017	29256859	WHM-2017-01-091			skin	invasive	0	573		0	0	0	GCF_005707335.1	0	reads	3992838	399283800	100	143	96.15	147	2743416	288913	32.73
SRR5250746	MMMOSAM:37da0c4e-2060-4f9c-adc1-50f6f177990c	PRJNA369475	SAMN06328152	Young BC	2017	29256859	WHM-2017-01-091			nose	colonising	0	573		0	0	0	GCF_005707335.1	0	reads	3678292	367829200	100	131	96.25	108	2740867	182296	32.72
SRR5250747	MMMOSAM:365a81b3-fd54-49d2-925e-26466ddc2b7a	PRJNA369475	SAMN06328153	Young BC	2017	29256859	WHM-2017-01-091			skin	invasive	0	573		2	2	2	GCF_005707335.1	0	reads	3305668	330566800	100	118	96.12	150	2752026	121036	32.73
SRR5250795	MMMOSAM:2c62cee2-88f3-469d-bbdf-1f8956e66135	PRJNA369475	SAMN06328201	Young BC	2017	29256859	WHM-2017-01-091			nose	colonising	0	573		0	0	0	GCF_005707335.1	0	reads	4282430	428243000	100	153	95.53	163	2744775	171069	32.74
SRR5251392	MMMOSAM:05e9f602-6f86-4bdf-ba2c-4c5d4b8fef43	PRJNA369475	SAMN06328762	Young BC	2017	29256859	WHM-2017-01-091		Yes	skin	invasive	0	573		0	0	0	GCF_005707335.1	0	reads	2548446	254844600	100	91	96.13	153	2744101	147308	32.74
SRR5249873	MMMOSAM:f82301c1-5576-4e5d-81bd-89908d915499	PRJNA369475	SAMN06327279	Young BC	2017	29256859	WHM-2017-01-092	Yes		nose	colonising	0	22					GCF_014335895.1	0	reads	3539302	353930200	100	126	96.4	189	2743258	152122	32.75
SRR5249949	MMMOSAM:e6bdd20a-1587-4d9f-9b0d-d40dfba17c49	PRJNA369475	SAMN06327355	Young BC	2017	29256859	WHM-2017-01-092			skin	invasive	2	22		2	0	0	GCF_014335895.1	0	reads	3766770	376677000	100	135	96.36	174	2742836	153647	32.75
SRR5249960	MMMOSAM:e4b90370-1a4e-4014-b499-4478cbc7c567	PRJNA369475	SAMN06327366	Young BC	2017	29256859	WHM-2017-01-092			skin	invasive	2	22		1	0	0	GCF_014335895.1	0	reads	4868466	486846600	100	174	96.48	369	2933944	51071	32.59
SRR5249968	MMMOSAM:e36491d0-49ba-4608-870b-b55af402e1c0	PRJNA369475	SAMN06327374	Young BC	2017	29256859	WHM-2017-01-092			nose	colonising	0	22		3	1	0	GCF_014335895.1	0	reads	4576112	457611200	100	164	96.43	161	2741669	146760	32.74
SRR5250160	MMMOSAM:ba95044a-648e-4d6f-902d-a4c7fb0547e7	PRJNA369475	SAMN06327566	Young BC	2017	29256859	WHM-2017-01-092			skin	invasive	2	22		1	0	0	GCF_014335895.1	0	reads	4226522	422652200	100	151	96.41	390	2953056	58075	32.59
SRR5250263	MMMOSAM:a1c8ee17-8411-420c-b692-83e7f2b9cb58	PRJNA369475	SAMN06327669	Young BC	2017	29256859	WHM-2017-01-092			skin	invasive	2	22		2	0	0	GCF_014335895.1	0	reads	3565080	356508000	100	127	96.37	190	2743276	152122	32.75
SRR5250266	MMMOSAM:a14c0525-9443-4c4a-8278-032343bffbb7	PRJNA369475	SAMN06327672	Young BC	2017	29256859	WHM-2017-01-092			nose	colonising	0	22		3	2	1	GCF_014335895.1	0	reads	3298626	329862600	100	118	96.51	198	2742562	152122	32.74
SRR5250267	MMMOSAM:a13b891a-e522-49e6-99ef-6ba33c0fb3f3	PRJNA369475	SAMN06327673	Young BC	2017	29256859	WHM-2017-01-092			nose	colonising	0	22		0	0	0	GCF_014335895.1	0	reads	3736454	373645400	100	133	96.44	193	2742149	152122	32.74
SRR5250281	MMMOSAM:9ebf8e11-c178-4a9a-acd7-a9430d5d1b75	PRJNA369475	SAMN06327687	Young BC	2017	29256859	WHM-2017-01-092			nose	colonising	0	22		2	1	1	GCF_014335895.1	0	reads	3299938	329993800	100	118	96.33	180	2742312	153647	32.74
SRR5250289	MMMOSAM:9cb7afbb-7a58-4e4e-869f-46256cced236	PRJNA369475	SAMN06327695	Young BC	2017	29256859	WHM-2017-01-092			nose	colonising	0	22		1	0	0	GCF_014335895.1	0	reads	3394016	339401600	100	121	96.51	187	2741178	124821	32.74
SRR5250373	MMMOSAM:87bcde28-9804-44c9-b2c6-829418c62b86	PRJNA369475	SAMN06327779	Young BC	2017	29256859	WHM-2017-01-092			nose	colonising	0	22		1	0	0	GCF_014335895.1	0	reads	3816298	381629800	100	136	96.37	192	2741395	115787	32.75
SRR5250394	MMMOSAM:829101c9-438b-452c-82af-6bab57845ac8	PRJNA369475	SAMN06327800	Young BC	2017	29256859	WHM-2017-01-092			nose	colonising	0	22		2	0	0	GCF_014335895.1	0	reads	5951734	595173400	100	213	96.38	203	2741728	124725	32.74
SRR5250444	MMMOSAM:766e3ef5-641c-43be-8d11-6356a119c2a3	PRJNA369475	SAMN06327850	Young BC	2017	29256859	WHM-2017-01-092			skin	invasive	2	22		1	0	0	GCF_014335895.1	0	reads	3987060	398706000	100	142	96.28	219	2744357	152102	32.75
SRR5250508	MMMOSAM:69d739e2-c34e-4f2d-b80d-c046301e8a4f	PRJNA369475	SAMN06327914	Young BC	2017	29256859	WHM-2017-01-092			nose	colonising	0	22		2	0	0	GCF_014335895.1	0	reads	4947452	494745200	100	177	96.48	203	2743280	124821	32.75
SRR5250517	MMMOSAM:6851631f-d5f3-4083-8319-9d55a699a947	PRJNA369475	SAMN06327923	Young BC	2017	29256859	WHM-2017-01-092			skin	invasive	2	22		2	0	0	GCF_014335895.1	0	reads	3588528	358852800	100	128	96.36	197	2743336	152122	32.75
SRR5250580	MMMOSAM:5c3cf5ca-36e7-41f9-b78c-aba1441bb76a	PRJNA369475	SAMN06327986	Young BC	2017	29256859	WHM-2017-01-092			skin	invasive	2	22		3	1	1	GCF_014335895.1	0	reads	3801936	380193600	100	136	96.46	186	2741877	124821	32.74
SRR5250637	MMMOSAM:50f76e30-1276-465c-a3fa-5e5ce70ae96a	PRJNA369475	SAMN06328043	Young BC	2017	29256859	WHM-2017-01-092			nose	colonising	0	22		3	1	1	GCF_014335895.1	0	reads	3274490	327449000	100	117	96.46	219	2743659	152122	32.75
SRR5250667	MMMOSAM:48569797-9f43-4523-bc1a-6ef3ee589298	PRJNA369475	SAMN06328073	Young BC	2017	29256859	WHM-2017-01-092			skin	invasive	2	22		1	0	0	GCF_014335895.1	0	reads	3150892	315089200	100	112	96.44	199	2741681	152102	32.74
SRR5250707	MMMOSAM:3f10a184-661a-4bf4-943a-0f6492402811	PRJNA369475	SAMN06328113	Young BC	2017	29256859	WHM-2017-01-092			nose	colonising	0	22		1	0	0	GCF_014335895.1	0	reads	2184256	218425600	100	78	96.51	211	2743466	124821	32.75
SRR5250711	MMMOSAM:3eb62949-cf56-49b7-ab62-b2d3cbd05662	PRJNA369475	SAMN06328117	Young BC	2017	29256859	WHM-2017-01-092			nose	colonising	0	22		2	0	0	GCF_014335895.1	0	reads	4493636	449363600	100	161	96.3	377	2927168	72802	32.64
SRR5251299	MMMOSAM:1b81f64e-1b3c-4285-a179-8b8d3c0ebded	PRJNA369475	SAMN06328669	Young BC	2017	29256859	WHM-2017-01-092			skin	invasive	2	22		2	1	0	GCF_014335895.1	0	reads	3723400	372340000	100	133	96.42	178	2742373	153531	32.75
SRR5251369	MMMOSAM:0d9f91b1-704e-461f-8dcc-1ee0e22c8299	PRJNA369475	SAMN06328739	Young BC	2017	29256859	WHM-2017-01-092		Yes	skin	invasive	2	22		1	0	0	GCF_014335895.1	0	reads	3921248	392124800	100	140	96.44	180	2741681	124821	32.74
SRR5251376	MMMOSAM:0c0dd924-1884-4c6b-823e-1d2a0f5cf789	PRJNA369475	SAMN06328746	Young BC	2017	29256859	WHM-2017-01-092			skin	invasive	2	22		2	1	1	GCF_014335895.1	0	reads	2565366	256536600	100	91	96.49	207	2742166	152122	32.75
SRR5251383	MMMOSAM:0a2f07cf-d838-435e-be30-d5fb47fcb666	PRJNA369475	SAMN06328753	Young BC	2017	29256859	WHM-2017-01-092			skin	invasive	2	22		2	0	0	GCF_014335895.1	0	reads	3460012	346001200	100	124	96.45	167	2741174	153647	32.74
SRR5249939	MMMOSAM:ebecefea-f84a-4a66-a64a-43c7db6b3a49	PRJNA369475	SAMN06327345	Young BC	2017	29256859	WHM-2017-01-093			nose	colonising	0	582		5	3	3	GCF_009912415.1	0	reads	3257670	325767000	100	116	95.24	155	2722687	177673	32.75
SRR5249992	MMMOSAM:df413583-ac1d-4a19-ad55-f5b58086b3c2	PRJNA369475	SAMN06327398	Young BC	2017	29256859	WHM-2017-01-093			nose	colonising	0	582		5	3	3	GCF_009912415.1	0	reads	3695112	369511200	100	132	95.68	152	2722484	169448	32.75
SRR5250091	MMMOSAM:ca7b9e07-c2e3-4df6-a261-41daef3f31e9	PRJNA369475	SAMN06327497	Young BC	2017	29256859	WHM-2017-01-093			skin	invasive	0	582		4	2	2	GCF_009912415.1	0	reads	4363258	436325800	100	156	95.79	122	2720597	231014	32.74
SRR5250121	MMMOSAM:c3feb08e-5860-4a8c-92b4-577aecde88e5	PRJNA369475	SAMN06327527	Young BC	2017	29256859	WHM-2017-01-093			nose	colonising	0	582		4	2	2	GCF_009912415.1	0	reads	3608526	360852600	100	129	95.67	151	2723058	231014	32.76
SRR5250125	MMMOSAM:c3268152-d8a6-4387-94ab-a9ab390ba1f6	PRJNA369475	SAMN06327531	Young BC	2017	29256859	WHM-2017-01-093			skin	invasive	0	582		4	2	2	GCF_009912415.1	0	reads	4159984	415998400	100	149	95.73	140	2721600	197332	32.75
SRR5250153	MMMOSAM:bb6ebf93-7c95-4fa0-afeb-86826fe8eda2	PRJNA369475	SAMN06327559	Young BC	2017	29256859	WHM-2017-01-093	Yes		nose	colonising	0	582					GCF_009912415.1	0	reads	3764354	376435400	100	134	95.76	140	2722177	184736	32.75
SRR5250164	MMMOSAM:b9b6c613-c8fa-4274-9fca-594fe4a6f243	PRJNA369475	SAMN06327570	Young BC	2017	29256859	WHM-2017-01-093			nose	colonising	0	582		4	2	2	GCF_009912415.1	0	reads	3434076	343407600	100	123	95.73	166	2723213	152689	32.76
SRR5250233	MMMOSAM:a886e10e-af6c-4205-88bf-8015ad6adb5c	PRJNA369475	SAMN06327639	Young BC	2017	29256859	WHM-2017-01-093			skin	invasive	0	582		5	3	3	GCF_009912415.1	0	reads	4626980	462698000	100	165	95.71	146	2721664	249844	32.75
SRR5250285	MMMOSAM:9ddce145-61ef-44a4-b06b-dd0ece16d11c	PRJNA369475	SAMN06327691	Young BC	2017	29256859	WHM-2017-01-093			skin	invasive	0	582		4	2	2	GCF_009912415.1	0	reads	4182942	418294200	100	149	95.7	124	2721402	251794	32.75
SRR5250313	MMMOSAM:980987fd-20e5-4909-8f94-a47df2d1c9a1	PRJNA369475	SAMN06327719	Young BC	2017	29256859	WHM-2017-01-093			skin	invasive	0	582		5	3	3	GCF_009912415.1	0	reads	4642230	464223000	100	166	95.76	145	2722731	169496	32.76
SRR5250317	MMMOSAM:977d9a50-9df1-4cd3-ba4b-b7fbc27fb43a	PRJNA369475	SAMN06327723	Young BC	2017	29256859	WHM-2017-01-093			nose	colonising	0	582		5	3	3	GCF_009912415.1	0	reads	3534872	353487200	100	126	95.94	141	2722574	249844	32.75
SRR5250331	MMMOSAM:93df02ae-8355-45b6-b624-4840de40aded	PRJNA369475	SAMN06327737	Young BC	2017	29256859	WHM-2017-01-093			nose	colonising	0	582		4	2	2	GCF_009912415.1	0	reads	3400326	340032600	100	121	95.92	132	2721061	169496	32.75
SRR5250354	MMMOSAM:8d0cc637-a070-4823-86f6-b53ba530acc3	PRJNA369475	SAMN06327760	Young BC	2017	29256859	WHM-2017-01-093			skin	invasive	0	582		4	2	2	GCF_009912415.1	0	reads	4389680	438968000	100	157	95.66	144	2721654	169618	32.75
SRR5250358	MMMOSAM:8c37f06b-9a12-477b-a454-5049f9287dbb	PRJNA369475	SAMN06327764	Young BC	2017	29256859	WHM-2017-01-093			nose	colonising	0	582		3	2	2	GCF_009912415.1	0	reads	2901446	290144600	100	104	95.58	132	2721586	191948	32.75
SRR5250364	MMMOSAM:8b001ae1-66c2-4540-96ca-a4e7b3ca036a	PRJNA369475	SAMN06327770	Young BC	2017	29256859	WHM-2017-01-093			nose	colonising	0	582		4	2	2	GCF_009912415.1	0	reads	3910900	391090000	100	140	95.85	126	2721048	170294	32.74
SRR5250416	MMMOSAM:7d98d24c-3ab6-4d10-bab1-5a52b150eeb6	PRJNA369475	SAMN06327822	Young BC	2017	29256859	WHM-2017-01-093			skin	invasive	0	582		4	2	2	GCF_009912415.1	0	reads	4624224	462422400	100	165	95.67	131	2721519	177673	32.75
SRR5250436	MMMOSAM:786deef2-a934-45c1-b398-0815d907dc7a	PRJNA369475	SAMN06327842	Young BC	2017	29256859	WHM-2017-01-093		Yes	skin	invasive	0	582		4	2	2	GCF_009912415.1	0	reads	3011622	301162200	100	107	82.02	2888	5619089	38306	34.61
SRR5250509	MMMOSAM:69d2dba5-56ff-420a-8271-7801b2d69ec0	PRJNA369475	SAMN06327915	Young BC	2017	29256859	WHM-2017-01-093			nose	colonising	0	582		4	3	3	GCF_009912415.1	0	reads	3434346	343434600	100	123	95.75	128	2721502	249844	32.75
SRR5250708	MMMOSAM:3eee4445-3823-4645-b912-f01caef41579	PRJNA369475	SAMN06328114	Young BC	2017	29256859	WHM-2017-01-093			skin	invasive	0	582		5	3	3	GCF_009912415.1	0	reads	4345158	434515800	100	155	95.84	149	2722201	231014	32.75
SRR5250748	MMMOSAM:35edc569-c4e1-49b6-9da6-d9b71fbe1695	PRJNA369475	SAMN06328154	Young BC	2017	29256859	WHM-2017-01-093			skin	invasive	0	582		4	2	2	GCF_009912415.1	0	reads	4809016	480901600	100	172	95.86	144	2722417	184736	32.75
SRR5250750	MMMOSAM:35653067-3a41-4a57-8e18-54d948aaa3b3	PRJNA369475	SAMN06328156	Young BC	2017	29256859	WHM-2017-01-093			skin	invasive	0	582		5	3	3	GCF_009912415.1	0	reads	4704052	470405200	100	168	92.74	200	2763374	191880	32.8
SRR5251258	MMMOSAM:222c81c4-409e-42ce-a486-858497d4826b	PRJNA369475	SAMN06328628	Young BC	2017	29256859	WHM-2017-01-093			nose	colonising	0	582		4	2	2	GCF_009912415.1	0	reads	4049718	404971800	100	145	95.87	116	2720321	249844	32.74
SRR5251297	MMMOSAM:1bb16d2a-6269-497e-9be7-7ae2adfdfed0	PRJNA369475	SAMN06328667	Young BC	2017	29256859	WHM-2017-01-093			nose	colonising	0	582		4	2	2	GCF_009912415.1	0	reads	3403356	340335600	100	122	95.8	125	2721269	184736	32.75
SRR5249926	MMMOSAM:ee8a79cf-8d45-411e-9190-3c4d27bf59f4	PRJNA369475	SAMN06327332	Young BC	2017	29256859	WHM-2017-01-094			nose	colonising	0	36	Yes	2	2	2	GCF_900478245.1	0	reads	3666802	366680200	100	131	91.27	132	2904684	158468	32.77
SRR5249963	MMMOSAM:e41ca0e1-53b0-45dc-a303-487c665be8f4	PRJNA369475	SAMN06327369	Young BC	2017	29256859	WHM-2017-01-094			nose	colonising	0	36	Yes	1	1	1	GCF_900478245.1	0	reads	3630448	363044800	100	130	91.27	123	2903938	158468	32.77
SRR5249995	MMMOSAM:de08ae4b-4a2d-42b3-8361-649793ea73d8	PRJNA369475	SAMN06327401	Young BC	2017	29256859	WHM-2017-01-094			nose	colonising	0	36	Yes	2	2	2	GCF_900478245.1	0	reads	3431678	343167800	100	123	91.27	123	2904066	150309	32.77
SRR5249996	MMMOSAM:ddb845a6-4bda-4ea8-8034-44ebd8f50f43	PRJNA369475	SAMN06327402	Young BC	2017	29256859	WHM-2017-01-094			skin	invasive	0	36	Yes	1	1	1	GCF_900478245.1	0	reads	3555510	355551000	100	127	90.98	117	2904141	158468	32.77
SRR5250140	MMMOSAM:be5caa3f-d218-4cc6-ae71-94b68595f8f4	PRJNA369475	SAMN06327546	Young BC	2017	29256859	WHM-2017-01-094	Yes		nose	colonising	0	36	Yes				GCF_900478245.1	0	reads	5381880	538188000	100	192	91.29	119	2903762	158468	32.77
SRR5250239	MMMOSAM:a7459664-3442-4e6e-8c3e-6f718c8af5c6	PRJNA369475	SAMN06327645	Young BC	2017	29256859	WHM-2017-01-094			skin	invasive	0	36	Yes	1	1	1	GCF_900478245.1	0	reads	3271210	327121000	100	117	91.16	129	2904290	150799	32.77
SRR5250241	MMMOSAM:a6fbb8e6-7fe3-4984-a891-4268d16ae9b3	PRJNA369475	SAMN06327647	Young BC	2017	29256859	WHM-2017-01-094			nose	colonising	0	36	Yes	2	2	2	GCF_900478245.1	0	reads	3000878	300087800	100	107	90.83	130	2904318	150798	32.77
SRR5250248	MMMOSAM:a57b15ba-6d9c-41f2-be13-f405f63f85dd	PRJNA369475	SAMN06327654	Young BC	2017	29256859	WHM-2017-01-094			skin	invasive	0	36	Yes	1	1	1	GCF_900478245.1	0	reads	4072854	407285400	100	146	91.14	117	2903725	158468	32.76
SRR5250274	MMMOSAM:9fd6262f-86c0-460e-9eee-55ca9d346f4d	PRJNA369475	SAMN06327680	Young BC	2017	29256859	WHM-2017-01-094			skin	invasive	0	36	Yes	1	1	1	GCF_900478245.1	0	reads	2949078	294907800	100	105	90.95	140	2905439	158468	32.77
SRR5250311	MMMOSAM:98a338c1-495b-444f-8fe3-cefd23e17179	PRJNA369475	SAMN06327717	Young BC	2017	29256859	WHM-2017-01-094			nose	colonising	0	36	Yes	2	2	2	GCF_900478245.1	0	reads	3830408	383040800	100	137	91.28	148	2915009	141891	32.77
SRR5250401	MMMOSAM:7fda7de9-3834-4350-812e-19e9e93ae8e0	PRJNA369475	SAMN06327807	Young BC	2017	29256859	WHM-2017-01-094			nose	colonising	0	36	Yes	1	1	1	GCF_900478245.1	0	reads	3198158	319815800	100	114	91.23	122	2903833	150798	32.77
SRR5250468	MMMOSAM:72c614be-cfdb-4243-817e-6fffad24a7d9	PRJNA369475	SAMN06327874	Young BC	2017	29256859	WHM-2017-01-094			nose	colonising	0	36	Yes	1	1	1	GCF_900478245.1	0	reads	4317038	431703800	100	154	91.28	113	2903207	150799	32.76
SRR5250557	MMMOSAM:609e90cd-b0b2-4869-83be-55739e2157b8	PRJNA369475	SAMN06327963	Young BC	2017	29256859	WHM-2017-01-094			skin	invasive	0	36	Yes	1	1	1	GCF_900478245.1	0	reads	4074588	407458800	100	146	91.27	125	2903844	150799	32.77
SRR5250572	MMMOSAM:5d60afc0-3c6c-47cb-84d7-fd1c0e4a5ae0	PRJNA369475	SAMN06327978	Young BC	2017	29256859	WHM-2017-01-094			skin	invasive	0	36	Yes	1	1	1	GCF_900478245.1	0	reads	4261682	426168200	100	152	91.1	124	2904405	158468	32.77
SRR5250621	MMMOSAM:542b108f-f173-4ce1-a192-3d0371ef3cea	PRJNA369475	SAMN06328027	Young BC	2017	29256859	WHM-2017-01-094			skin	invasive	0	36	Yes	1	1	1	GCF_900478245.1	0	reads	3827594	382759400	100	137	90.93	113	2902547	150799	32.76
SRR5250674	MMMOSAM:46fb7ef2-d492-499e-b421-f727e8355db1	PRJNA369475	SAMN06328080	Young BC	2017	29256859	WHM-2017-01-094			nose	colonising	0	36	Yes	2	2	2	GCF_900478245.1	0	reads	3547620	354762000	100	127	91.27	125	2904069	158468	32.77
SRR5250769	MMMOSAM:30c469a1-95d0-4265-a7f6-6dfdba0e5382	PRJNA369475	SAMN06328175	Young BC	2017	29256859	WHM-2017-01-094			nose	colonising	0	36	Yes	2	2	2	GCF_900478245.1	0	reads	3170018	317001800	100	113	91.37	129	2903811	150798	32.77
SRR5250830	MMMOSAM:241f8db0-62f4-46bd-9213-d40b199a6fea	PRJNA369475	SAMN06328236	Young BC	2017	29256859	WHM-2017-01-094			skin	invasive	0	36	Yes	1	1	1	GCF_900478245.1	0	reads	3590178	359017800	100	128	91.05	131	2904390	150799	32.77
SRR5251275	MMMOSAM:1f260978-2034-43db-a591-94cd3d2b6386	PRJNA369475	SAMN06328645	Young BC	2017	29256859	WHM-2017-01-094			skin	invasive	0	36	Yes	1	1	1	GCF_900478245.1	0	reads	4000136	400013600	100	143	91.13	129	2904646	158468	32.77
SRR5251293	MMMOSAM:1c48f22c-bfc5-4313-ad09-2c49751254b8	PRJNA369475	SAMN06328663	Young BC	2017	29256859	WHM-2017-01-094		Yes	skin	invasive	0	36	Yes	1	1	1	GCF_900478245.1	0	reads	3550734	355073400	100	127	91	127	2904159	150799	32.77
SRR5251350	MMMOSAM:1084d83d-a94e-4299-8ea7-68ddf0679455	PRJNA369475	SAMN06328720	Young BC	2017	29256859	WHM-2017-01-094			skin	invasive	0	36	Yes	1	1	1	GCF_900478245.1	0	reads	4850184	485018400	100	173	91.31	123	2904072	158468	32.77
SRR5251406	MMMOSAM:03365127-49c6-49d4-908c-dd923f0ee1d5	PRJNA369475	SAMN06328776	Young BC	2017	29256859	WHM-2017-01-094			skin	invasive	0	36	Yes	1	1	1	GCF_900478245.1	0	reads	3893066	389306600	100	139	91.25	127	2904165	150798	32.77
SRR5249904	MMMOSAM:f2ac1864-f35d-454c-9922-7cab54209081	PRJNA369475	SAMN06327310	Young BC	2017	29256859	WHM-2017-01-095			nose	colonising	0	-		7	7	7	GCF_013467165.1	0	reads	4423350	442335000	100	158	93.74	97	2812295	170632	32.73
SRR5249947	MMMOSAM:e84b8a6b-cde7-4e5e-b24b-9d89eb39591b	PRJNA369475	SAMN06327353	Young BC	2017	29256859	WHM-2017-01-095			skin	invasive	-1	-		9	9	9	GCF_013467165.1	0	reads	4640478	464047800	100	166	93.74	114	2813386	165296	32.75
SRR5250029	MMMOSAM:d64a5880-3f0e-4c7a-8145-593d4124daed	PRJNA369475	SAMN06327435	Young BC	2017	29256859	WHM-2017-01-095			nose	colonising	0	-		5	5	5	GCF_013467165.1	0	reads	4153498	415349800	100	148	93.9	107	2813016	165296	32.74
SRR5250162	MMMOSAM:ba3650f8-89ed-49a8-b8e6-600af06ccb52	PRJNA369475	SAMN06327568	Young BC	2017	29256859	WHM-2017-01-095			nose	colonising	0	-		7	7	7	GCF_013467165.1	0	reads	3476358	347635800	100	124	93.45	127	2851685	150799	32.76
SRR5250183	MMMOSAM:b3d2145a-d805-4c2a-82d8-a31b0215f2cf	PRJNA369475	SAMN06327589	Young BC	2017	29256859	WHM-2017-01-095			nose	colonising	0	-		4	4	4	GCF_013467165.1	0	reads	4218216	421821600	100	151	93.91	100	2811721	170634	32.73
SRR5250210	MMMOSAM:acc7a8c1-e5e2-4f2c-878a-d15853b4ae71	PRJNA369475	SAMN06327616	Young BC	2017	29256859	WHM-2017-01-095			nose	colonising	0	-		8	8	8	GCF_013467165.1	0	reads	3346324	334632400	100	119	93.8	116	2813657	165296	32.75
SRR5250254	MMMOSAM:a40d8959-112d-4d1d-b830-c05032f717a7	PRJNA369475	SAMN06327660	Young BC	2017	29256859	WHM-2017-01-095			nose	colonising	0	-		5	5	5	GCF_013467165.1	0	reads	3869264	386926400	100	138	93.65	117	2813654	165296	32.74
SRR5250265	MMMOSAM:a16f70b8-3743-425f-9be2-0a33a2eb5ddc	PRJNA369475	SAMN06327671	Young BC	2017	29256859	WHM-2017-01-095			skin	invasive	-1	-		9	9	9	GCF_013467165.1	0	reads	4565578	456557800	100	163	93.85	100	2812666	170632	32.74
SRR5250288	MMMOSAM:9d24962c-368e-4de2-a05b-0b0bbc077fb4	PRJNA369475	SAMN06327694	Young BC	2017	29256859	WHM-2017-01-095			skin	invasive	-1	-		9	9	9	GCF_013467165.1	0	reads	3927462	392746200	100	140	93.78	111	2813039	165296	32.74
SRR5250306	MMMOSAM:9a6d69a3-cac2-4bc9-a018-913e908de9af	PRJNA369475	SAMN06327712	Young BC	2017	29256859	WHM-2017-01-095			nose	colonising	0	-		9	9	9	GCF_013467165.1	0	reads	3215374	321537400	100	115	93.7	114	2813266	165296	32.74
SRR5250387	MMMOSAM:841daa87-2541-4111-8bd4-821e681f19b6	PRJNA369475	SAMN06327793	Young BC	2017	29256859	WHM-2017-01-095			nose	colonising	0	-		11	11	11	GCF_013467165.1	0	reads	2920966	292096600	100	104	93.65	116	2814801	150799	32.74
SRR5250398	MMMOSAM:80d54867-9d12-4db2-b570-203ab600cb83	PRJNA369475	SAMN06327804	Young BC	2017	29256859	WHM-2017-01-095			skin	invasive	-1	-		9	9	9	GCF_013467165.1	0	reads	5007234	500723400	100	179	94.01	111	2813366	165296	32.74
SRR5250441	MMMOSAM:77c70616-9bed-4ef5-8c27-c3dc99152029	PRJNA369475	SAMN06327847	Young BC	2017	29256859	WHM-2017-01-095	Yes		nose	colonising	0	-					GCF_013467165.1	0	reads	3951170	395117000	100	141	93.87	104	2812730	170632	32.74
SRR5250475	MMMOSAM:7191a871-be14-4345-9874-55783c1932f5	PRJNA369475	SAMN06327881	Young BC	2017	29256859	WHM-2017-01-095		Yes	skin	invasive	-1	-		9	9	9	GCF_013467165.1	0	reads	4999396	499939600	100	179	93.72	111	2812811	170634	32.74
SRR5250616	MMMOSAM:553c8b24-5b7e-436f-8a9c-38e64f60917d	PRJNA369475	SAMN06328022	Young BC	2017	29256859	WHM-2017-01-095			nose	colonising	0	-		2	2	2	GCF_013467165.1	0	reads	3070360	307036000	100	110	93.26	119	2850551	137151	32.76
SRR5250696	MMMOSAM:42901024-9197-4c04-a3a7-e26d167b1062	PRJNA369475	SAMN06328102	Young BC	2017	29256859	WHM-2017-01-095			skin	invasive	-1	-		9	9	9	GCF_013467165.1	0	reads	4829672	482967200	100	173	93.9	113	2813850	170634	32.74
SRR5250744	MMMOSAM:3865badb-e694-4039-999e-085eea74fa2f	PRJNA369475	SAMN06328150	Young BC	2017	29256859	WHM-2017-01-095			nose	colonising	0	-		0	0	0	GCF_013467165.1	0	reads	3743986	374398600	100	134	93.59	107	2812728	165296	32.74
SRR5250775	MMMOSAM:304e5b29-ff0d-4cd8-9cc4-a5e587db1db4	PRJNA369475	SAMN06328181	Young BC	2017	29256859	WHM-2017-01-095			skin	invasive	-1	-		9	9	9	GCF_013467165.1	0	reads	4324196	432419600	100	155	93.77	103	2812626	165296	32.74
SRR5250823	MMMOSAM:25291180-ed0d-4033-8bfd-7d61e0cf9145	PRJNA369475	SAMN06328229	Young BC	2017	29256859	WHM-2017-01-095			skin	invasive	-1	-		9	9	9	GCF_013467165.1	0	reads	4559574	455957400	100	163	93.78	113	2813603	165296	32.75
SRR5250831	MMMOSAM:23d179f9-54ac-48d4-a775-eb55c59dd8e7	PRJNA369475	SAMN06328237	Young BC	2017	29256859	WHM-2017-01-095			skin	invasive	-1	-		9	9	9	GCF_013467165.1	0	reads	3695020	369502000	100	132	93.9	115	2813685	165296	32.74
SRR5251362	MMMOSAM:0e81a8e3-13c3-4203-9830-be961ce53a73	PRJNA369475	SAMN06328732	Young BC	2017	29256859	WHM-2017-01-095			skin	invasive	-1	-		9	9	9	GCF_013467165.1	0	reads	3545156	354515600	100	127	93.82	114	2813216	170634	32.74
SRR5251379	MMMOSAM:0b43aac2-fbf8-4140-9147-c1162df653b7	PRJNA369475	SAMN06328749	Young BC	2017	29256859	WHM-2017-01-095			skin	invasive	-1	-		10	10	10	GCF_013467165.1	0	reads	3916930	391693000	100	140	93.72	116	2813607	170821	32.74
SRR5251401	MMMOSAM:03db2829-2060-4e75-842f-cf2dc399b3ea	PRJNA369475	SAMN06328771	Young BC	2017	29256859	WHM-2017-01-095			nose	colonising	0	-		8	8	8	GCF_013467165.1	0	reads	3077870	307787000	100	110	93.63	114	2813308	165296	32.74
SRR5249839	MMMOSAM:ff16d134-43f9-4a33-b786-830586d038ec	PRJNA369475	SAMN06327245	Young BC	2017	29256859	WHM-2017-01-096			skin	invasive	3	22		29	27	27	GCF_003184985.1	0	reads	5201894	520189400	100	186	95.36	120	2766211	151952	32.78
SRR5250018	MMMOSAM:d8d33e54-a0c1-41ec-a7ff-55059986dd0f	PRJNA369475	SAMN06327424	Young BC	2017	29256859	WHM-2017-01-096			skin	invasive	3	22		28	27	27	GCF_003184985.1	0	reads	5536236	553623600	100	198	95.34	140	2767404	151952	32.79
SRR5250022	MMMOSAM:d7abf558-679e-4c5f-88c1-e58ba2874cc3	PRJNA369475	SAMN06327428	Young BC	2017	29256859	WHM-2017-01-096			skin	invasive	3	22		28	27	27	GCF_003184985.1	0	reads	4035520	403552000	100	144	95.29	98	2766324	173305	32.79
SRR5250138	MMMOSAM:be85ab53-5c0e-427d-8649-b4f45d482a6e	PRJNA369475	SAMN06327544	Young BC	2017	29256859	WHM-2017-01-096			skin	invasive	3	22		30	28	28	GCF_003184985.1	0	reads	5886268	588626800	100	211	95.17	112	2766872	173305	32.8
SRR5250168	MMMOSAM:b87c019c-01da-46ed-9730-0f71ea2096c7	PRJNA369475	SAMN06327574	Young BC	2017	29256859	WHM-2017-01-096			skin	invasive	3	22		29	28	28	GCF_003184985.1	0	reads	4068368	406836800	100	145	95.49	123	2766579	151952	32.79
SRR5250209	MMMOSAM:ad515c0d-7706-4f88-9422-1e37a7522405	PRJNA369475	SAMN06327615	Young BC	2017	29256859	WHM-2017-01-096			nose	colonising	0	22		4	3	3	GCF_003184985.1	0	reads	4475056	447505600	100	160	95.24	124	2768755	155708	32.79
SRR5250336	MMMOSAM:92c9d076-0228-4791-98ca-445574b874a1	PRJNA369475	SAMN06327742	Young BC	2017	29256859	WHM-2017-01-096			nose	colonising	0	22		2	0	0	GCF_003184985.1	0	reads	4439600	443960000	100	159	95.25	149	2769349	138697	32.79
SRR5250377	MMMOSAM:86c3e893-5a0a-4b9b-8ebd-d51b2483a04d	PRJNA369475	SAMN06327783	Young BC	2017	29256859	WHM-2017-01-096			nose	colonising	0	22		7	5	5	GCF_003184985.1	0	reads	4105410	410541000	100	147	95.18	159	2768949	131993	32.79
SRR5250405	MMMOSAM:7f707196-ed6f-41fb-9da6-2794bea37476	PRJNA369475	SAMN06327811	Young BC	2017	29256859	WHM-2017-01-096			nose	colonising	0	22		6	4	4	GCF_003184985.1	0	reads	3506004	350600400	100	125	95.4	145	2768764	138697	32.79
SRR5250524	MMMOSAM:673e5f91-777a-443f-bbd9-cc900344fb35	PRJNA369475	SAMN06327930	Young BC	2017	29256859	WHM-2017-01-096			skin	invasive	3	22		27	25	25	GCF_003184985.1	0	reads	2995116	299511600	100	107	95.38	140	2768223	151952	32.79
SRR5250597	MMMOSAM:5831cedc-07a4-467a-b555-394452b2edcf	PRJNA369475	SAMN06328003	Young BC	2017	29256859	WHM-2017-01-096	Yes		nose	colonising	0	22					GCF_003184985.1	0	reads	5152818	515281800	100	184	95.35	128	2769195	151952	32.79
SRR5250599	MMMOSAM:57cc6ab9-9e98-4964-ac10-f53373f6ccef	PRJNA369475	SAMN06328005	Young BC	2017	29256859	WHM-2017-01-096			skin	invasive	3	22		29	27	27	GCF_003184985.1	0	reads	3973326	397332600	100	142	95.45	137	2766751	151952	32.79
SRR5250604	MMMOSAM:571b9485-8ed0-4a45-9b1f-46dc5265024c	PRJNA369475	SAMN06328010	Young BC	2017	29256859	WHM-2017-01-096			skin	invasive	3	22		30	28	28	GCF_003184985.1	0	reads	3328228	332822800	100	119	95.44	132	2766966	155708	32.79
SRR5250730	MMMOSAM:3b9205fd-c900-463c-b348-6d860c23142b	PRJNA369475	SAMN06328136	Young BC	2017	29256859	WHM-2017-01-096			nose	colonising	0	22		5	4	4	GCF_003184985.1	0	reads	3991690	399169000	100	143	95.36	119	2768432	151952	32.79
SRR5250805	MMMOSAM:2a4cdb50-45ce-46c0-abfd-f2713d1f747b	PRJNA369475	SAMN06328211	Young BC	2017	29256859	WHM-2017-01-096			nose	colonising	0	22		6	5	5	GCF_003184985.1	0	reads	4983058	498305800	100	178	95.38	106	2767193	151952	32.78
SRR5251284	MMMOSAM:1e29dd31-9de6-4648-bee3-9a378ead2498	PRJNA369475	SAMN06328654	Young BC	2017	29256859	WHM-2017-01-096			skin	invasive	3	22		28	27	27	GCF_003184985.1	0	reads	4524998	452499800	100	162	95.07	106	2765881	151952	32.79
SRR5251308	MMMOSAM:1a5af555-1238-4859-a875-f9fb9a94925b	PRJNA369475	SAMN06328678	Young BC	2017	29256859	WHM-2017-01-096			nose	colonising	0	22		2	0	0	GCF_003184985.1	0	reads	3897184	389718400	100	139	95.53	129	2767954	138697	32.78
SRR5251312	MMMOSAM:198ed200-e8d0-4253-b938-0987d3a48d18	PRJNA369475	SAMN06328682	Young BC	2017	29256859	WHM-2017-01-096			skin	invasive	3	22		28	27	27	GCF_003184985.1	0	reads	4082768	408276800	100	146	95.36	129	2767057	151952	32.79
SRR5251339	MMMOSAM:12857f8a-debc-4350-8e9d-5d13ace720c5	PRJNA369475	SAMN06328709	Young BC	2017	29256859	WHM-2017-01-096			skin	invasive	3	22		29	27	27	GCF_003184985.1	0	reads	3787104	378710400	100	135	95.19	132	2766335	138697	32.79
SRR5251358	MMMOSAM:0f0cda69-b10b-4163-bdca-8356a426bb48	PRJNA369475	SAMN06328728	Young BC	2017	29256859	WHM-2017-01-096			nose	colonising	0	22		6	4	4	GCF_003184985.1	0	reads	3762592	376259200	100	134	95.21	113	2768288	150547	32.79
SRR5251370	MMMOSAM:0d8f48d3-7dc4-470d-9c49-d6d642112eb9	PRJNA369475	SAMN06328740	Young BC	2017	29256859	WHM-2017-01-096		Yes	skin	invasive	3	22		28	27	27	GCF_003184985.1	0	reads	3948078	394807800	100	141	95.22	134	2766759	132224	32.79
SRR5249877	MMMOSAM:f72c0279-ae8e-438b-bad8-28cfa710282a	PRJNA369475	SAMN06327283	Young BC	2017	29256859	WHM-2017-01-097	Yes		nose	colonising	0	1	Yes				GCF_002356655.1	0	reads	3630342	363034200	100	130	95.31	102	2781422	299215	32.7
SRR5250123	MMMOSAM:c3ddc436-0394-4258-a3de-507fa77b5efd	PRJNA369475	SAMN06327529	Young BC	2017	29256859	WHM-2017-01-097			nose	colonising	0	1	Yes	0	0	0	GCF_002356655.1	0	reads	3943084	394308400	100	141	95.88	79	2780091	317564	32.69
SRR5250243	MMMOSAM:a682e250-5264-4fe0-ad59-4fc79e8220eb	PRJNA369475	SAMN06327649	Young BC	2017	29256859	WHM-2017-01-097			nose	colonising	0	1	Yes	0	0	0	GCF_002356655.1	0	reads	3234948	323494800	100	116	96.02	85	2780618	458536	32.7
SRR5250257	MMMOSAM:a3652c81-0585-4ab7-b745-15ed8766fd09	PRJNA369475	SAMN06327663	Young BC	2017	29256859	WHM-2017-01-097			nose	colonising	0	1	Yes	0	0	0	GCF_002356655.1	0	reads	2220356	222035600	100	79	95.95	78	2779723	435880	32.69
SRR5250303	MMMOSAM:9a91a1b1-90dc-42f4-b163-493531f26b7d	PRJNA369475	SAMN06327709	Young BC	2017	29256859	WHM-2017-01-097			skin	invasive	0	1	Yes	0	0	0	GCF_002356655.1	0	reads	3499872	349987200	100	125	95.33	77	2779844	458536	32.69
SRR5250399	MMMOSAM:8004e4d3-45f9-4b52-923c-f7366fc3547a	PRJNA369475	SAMN06327805	Young BC	2017	29256859	WHM-2017-01-097			nose	colonising	0	1	Yes	0	0	0	GCF_002356655.1	0	reads	2935524	293552400	100	105	95.41	86	2780547	317226	32.7
SRR5250417	MMMOSAM:7d4afd2d-3e16-4ad7-b82e-349885150612	PRJNA369475	SAMN06327823	Young BC	2017	29256859	WHM-2017-01-097			skin	invasive	0	1	Yes	0	0	0	GCF_002356655.1	0	reads	2572832	257283200	100	92	95.35	96	2780779	435880	32.7
SRR5250437	MMMOSAM:78545479-5682-4143-99f9-2b12a511d6e1	PRJNA369475	SAMN06327843	Young BC	2017	29256859	WHM-2017-01-097			nose	colonising	0	1	Yes	1	1	1	GCF_002356655.1	0	reads	3108914	310891400	100	111	95.2	81	2780324	452977	32.69
SRR5250445	MMMOSAM:7656cf26-e909-4fd2-810e-891fd3c809aa	PRJNA369475	SAMN06327851	Young BC	2017	29256859	WHM-2017-01-097			nose	colonising	0	1	Yes	0	0	0	GCF_002356655.1	0	reads	3508966	350896600	100	125	95.05	85	2780493	296170	32.7
SRR5250454	MMMOSAM:75e31d5c-abdf-4cef-8158-22fd92edac48	PRJNA369475	SAMN06327860	Young BC	2017	29256859	WHM-2017-01-097			nose	colonising	0	1	Yes	0	0	0	GCF_002356655.1	0	reads	2894246	289424600	100	103	95.96	88	2780658	244849	32.7
SRR5250552	MMMOSAM:614f2735-52c5-4b7c-9850-b915025f1c62	PRJNA369475	SAMN06327958	Young BC	2017	29256859	WHM-2017-01-097			skin	invasive	0	1	Yes	0	0	0	GCF_002356655.1	0	reads	2972090	297209000	100	106	95.31	97	2781043	317260	32.7
SRR5250558	MMMOSAM:60511b96-2cd0-4a35-b66d-cbc55074364a	PRJNA369475	SAMN06327964	Young BC	2017	29256859	WHM-2017-01-097			skin	invasive	0	1	Yes	0	0	0	GCF_002356655.1	0	reads	3114614	311461400	100	111	95.46	86	2780175	458536	32.7
SRR5250568	MMMOSAM:5e1d018e-7033-46a9-93b7-9111f15feeae	PRJNA369475	SAMN06327974	Young BC	2017	29256859	WHM-2017-01-097			skin	invasive	0	1	Yes	0	0	0	GCF_002356655.1	0	reads	3369626	336962600	100	120	96.04	81	2779916	458487	32.69
SRR5250611	MMMOSAM:55f23cda-97b4-4ab3-b024-147f6b35e4d6	PRJNA369475	SAMN06328017	Young BC	2017	29256859	WHM-2017-01-097			nose	colonising	0	1	Yes	0	0	0	GCF_002356655.1	0	reads	2599428	259942800	100	93	96.01	96	2781075	336226	32.7
SRR5250627	MMMOSAM:53976a71-04ad-419b-9981-0aadafd6e149	PRJNA369475	SAMN06328033	Young BC	2017	29256859	WHM-2017-01-097			skin	invasive	0	1	Yes	0	0	0	GCF_002356655.1	0	reads	2957624	295762400	100	106	95.88	103	2781453	458478	32.7
SRR5250646	MMMOSAM:4ef0eca7-0411-4723-9c13-a634f5187480	PRJNA369475	SAMN06328052	Young BC	2017	29256859	WHM-2017-01-097		Yes	skin	invasive	0	1	Yes	0	0	0	GCF_002356655.1	0	reads	2778780	277878000	100	99	96.09	85	2780377	458536	32.69
SRR5250692	MMMOSAM:433e431f-c609-4682-b7b3-8c18b426e3f8	PRJNA369475	SAMN06328098	Young BC	2017	29256859	WHM-2017-01-097			skin	invasive	0	1	Yes	0	0	0	GCF_002356655.1	0	reads	3592608	359260800	100	128	95.79	62	2779379	458591	32.69
SRR5250723	MMMOSAM:3c90b721-7746-43d5-b441-dd42b5096746	PRJNA369475	SAMN06328129	Young BC	2017	29256859	WHM-2017-01-097			skin	invasive	0	1	Yes	0	0	0	GCF_002356655.1	0	reads	3030312	303031200	100	108	95.61	82	2779811	458432	32.69
SRR5250771	MMMOSAM:308b3244-d495-4fc3-8afa-19bc5c1bb638	PRJNA369475	SAMN06328177	Young BC	2017	29256859	WHM-2017-01-097			skin	invasive	0	1	Yes	0	0	0	GCF_002356655.1	0	reads	3111870	311187000	100	111	95.2	65	2779222	458536	32.69
SRR5251290	MMMOSAM:1cbdb8c6-11fb-4df2-b4fc-49f0fb2c01a9	PRJNA369475	SAMN06328660	Young BC	2017	29256859	WHM-2017-01-097			nose	colonising	0	1	Yes	0	0	0	GCF_002356655.1	0	reads	3119838	311983800	100	111	96.03	90	2780706	317605	32.7
SRR5251304	MMMOSAM:1aed8cc4-b8b8-44c4-91b7-5cf81e16d0eb	PRJNA369475	SAMN06328674	Young BC	2017	29256859	WHM-2017-01-097			skin	invasive	0	1	Yes	0	0	0	GCF_002356655.1	0	reads	2869856	286985600	100	102	96	91	2780760	453080	32.7
SRR5251386	MMMOSAM:08e4a31c-d43c-4b7d-8293-959078b68980	PRJNA369475	SAMN06328756	Young BC	2017	29256859	WHM-2017-01-097			skin	invasive	0	1	Yes	0	0	0	GCF_002356655.1	0	reads	3754500	375450000	100	134	96	84	2779934	314667	32.7
SRR5251387	MMMOSAM:0872a8e2-9569-4e59-9a2d-2c6a3d9fccb4	PRJNA369475	SAMN06328757	Young BC	2017	29256859	WHM-2017-01-097			nose	colonising	0	1	Yes	1	1	1	GCF_002356655.1	0	reads	2935646	293564600	100	105	95.37	94	2780597	336067	32.7
SRR5251412	MMMOSAM:021c57bd-5bbd-497f-acf2-80caa9bd2ffe	PRJNA369475	SAMN06328782	Young BC	2017	29256859	WHM-2017-01-097			nose	colonising	0	1	Yes	0	0	0	GCF_002356655.1	0	reads	2777100	277710000	100	99	95.61	88	2780882	458536	32.7
SRR5249834	MMMOSAM:ffde30fe-e83b-4741-858c-c2e489c366db	PRJNA369475	SAMN06327240	Young BC	2017	29256859	WHM-2017-01-098	Yes		nose	colonising	0	101					GCF_009912015.1	0	reads	2701234	270123400	100	96	94.78	92	2766143	250440	32.81
SRR5249921	MMMOSAM:ef8458c0-9285-444b-a05e-ed1ea2675782	PRJNA369475	SAMN06327327	Young BC	2017	29256859	WHM-2017-01-098			skin	invasive	0	101		4	4	3	GCF_009912015.1	0	reads	3990206	399020600	100	143	95.08	74	2764761	272266	32.8
SRR5249999	MMMOSAM:dc976560-d5ac-4514-aab5-2673018dc7eb	PRJNA369475	SAMN06327405	Young BC	2017	29256859	WHM-2017-01-098			skin	invasive	0	101		3	3	3	GCF_009912015.1	0	reads	3233322	323332200	100	115	95.22	99	2766470	293159	32.8
SRR5250016	MMMOSAM:d9098602-341b-44eb-b0f6-31d43c8dd06d	PRJNA369475	SAMN06327422	Young BC	2017	29256859	WHM-2017-01-098			nose	colonising	0	101		2	2	1	GCF_009912015.1	0	reads	2947634	294763400	100	105	95.03	106	2766620	250440	32.81
SRR5250114	MMMOSAM:c60f3eb2-1c7f-4724-b559-93041f9b6acc	PRJNA369475	SAMN06327520	Young BC	2017	29256859	WHM-2017-01-098			nose	colonising	0	101		0	0	0	GCF_009912015.1	0	reads	2692504	269250400	100	96	94.79	100	2765918	187950	32.8
SRR5250158	MMMOSAM:bad86cb0-08fe-4510-96ca-0795bf842c2c	PRJNA369475	SAMN06327564	Young BC	2017	29256859	WHM-2017-01-098			nose	colonising	0	101		1	1	1	GCF_009912015.1	0	reads	3761452	376145200	100	134	94.87	98	2765701	328487	32.8
SRR5250206	MMMOSAM:ae4cb01f-564d-4144-94a6-57beaadc407f	PRJNA369475	SAMN06327612	Young BC	2017	29256859	WHM-2017-01-098			skin	invasive	0	101		4	4	3	GCF_009912015.1	0	reads	3862590	386259000	100	138	95.16	72	2764525	383458	32.79
SRR5250226	MMMOSAM:aa13e293-f1f9-4556-a95c-cad426248919	PRJNA369475	SAMN06327632	Young BC	2017	29256859	WHM-2017-01-098			skin	invasive	0	101		4	4	4	GCF_009912015.1	0	reads	4043806	404380600	100	145	94.78	77	2765240	311579	32.8
SRR5250240	MMMOSAM:a7247f4e-9c3f-4036-9de8-e9234d25f32b	PRJNA369475	SAMN06327646	Young BC	2017	29256859	WHM-2017-01-098			skin	invasive	0	101		3	3	3	GCF_009912015.1	0	reads	3649572	364957200	100	130	94.88	84	2765141	272397	32.8
SRR5250269	MMMOSAM:a08e9170-fb17-4a4f-b97d-7a3bd0082841	PRJNA369475	SAMN06327675	Young BC	2017	29256859	WHM-2017-01-098			nose	colonising	0	101		2	2	1	GCF_009912015.1	0	reads	2516802	251680200	100	90	94.9	78	2764603	250509	32.8
SRR5250374	MMMOSAM:87289e53-3f89-470c-b216-f63b90c15c7b	PRJNA369475	SAMN06327780	Young BC	2017	29256859	WHM-2017-01-098			nose	colonising	0	101		1	1	0	GCF_009912015.1	0	reads	2665500	266550000	100	95	95.1	99	2766598	341139	32.81
SRR5250400	MMMOSAM:8000221e-ef67-4644-bbf7-aba782fc82e1	PRJNA369475	SAMN06327806	Young BC	2017	29256859	WHM-2017-01-098			skin	invasive	0	101		4	4	3	GCF_009912015.1	0	reads	3379320	337932000	100	121	94.78	66	2763826	469601	32.79
SRR5250409	MMMOSAM:7ecea960-594d-48a5-8c06-e9afceceda75	PRJNA369475	SAMN06327815	Young BC	2017	29256859	WHM-2017-01-098			skin	invasive	0	101		4	4	3	GCF_009912015.1	0	reads	3826638	382663800	100	137	94.92	77	2765221	502699	32.8
SRR5250449	MMMOSAM:762b4035-8689-4d13-b809-8a9ad816569b	PRJNA369475	SAMN06327855	Young BC	2017	29256859	WHM-2017-01-098			nose	colonising	0	101		1	1	1	GCF_009912015.1	0	reads	2357404	235740400	100	84	94.66	103	2766171	231386	32.8
SRR5250461	MMMOSAM:74acec62-d1f1-4123-8e7a-9993b8118dda	PRJNA369475	SAMN06327867	Young BC	2017	29256859	WHM-2017-01-098			nose	colonising	0	101		1	1	1	GCF_009912015.1	0	reads	3279944	327994400	100	117	95.06	88	2765666	383284	32.81
SRR5250486	MMMOSAM:6fb72b03-ca8b-4146-9f29-78154a6f97ce	PRJNA369475	SAMN06327892	Young BC	2017	29256859	WHM-2017-01-098		Yes	skin	invasive	0	101		4	4	3	GCF_009912015.1	0	reads	3567264	356726400	100	127	95.11	89	2766065	383284	32.8
SRR5250525	MMMOSAM:671ae72d-40f6-4335-ac3c-fe7792e875db	PRJNA369475	SAMN06327931	Young BC	2017	29256859	WHM-2017-01-098			nose	colonising	0	101		0	0	0	GCF_009912015.1	0	reads	3388678	338867800	100	121	94.86	78	2765195	250335	32.8
SRR5250613	MMMOSAM:557a8797-c310-4cfe-9e4d-23afa11df5db	PRJNA369475	SAMN06328019	Young BC	2017	29256859	WHM-2017-01-098			nose	colonising	0	101		1	1	0	GCF_009912015.1	0	reads	2765658	276565800	100	99	95.11	89	2765635	250335	32.8
SRR5250636	MMMOSAM:514a9b88-9aea-4310-8e1f-cc56f9368f3c	PRJNA369475	SAMN06328042	Young BC	2017	29256859	WHM-2017-01-098			skin	invasive	0	101		3	3	3	GCF_009912015.1	0	reads	3788088	378808800	100	135	94.94	74	2764485	469664	32.79
SRR5250751	MMMOSAM:35527f23-4173-480c-866d-1c214453fd87	PRJNA369475	SAMN06328157	Young BC	2017	29256859	WHM-2017-01-098			skin	invasive	0	101		3	3	3	GCF_009912015.1	0	reads	3185168	318516800	100	114	95.06	74	2764780	383284	32.8
SRR5251259	MMMOSAM:2219cbcb-df80-4bd2-8253-71443e668b8a	PRJNA369475	SAMN06328629	Young BC	2017	29256859	WHM-2017-01-098			skin	invasive	0	101		4	4	3	GCF_009912015.1	0	reads	4730382	473038200	100	169	95.17	99	2766677	383284	32.81
SRR5251404	MMMOSAM:034cd6a2-50a6-4298-872c-bcef99b2378e	PRJNA369475	SAMN06328774	Young BC	2017	29256859	WHM-2017-01-098			skin	invasive	0	101		5	5	4	GCF_009912015.1	0	reads	3622518	362251800	100	129	94.77	73	2764532	383284	32.8
SRR5251407	MMMOSAM:030f7422-7a2b-4cb5-a5a5-c695aa80e499	PRJNA369475	SAMN06328777	Young BC	2017	29256859	WHM-2017-01-098			nose	colonising	0	101		0	0	0	GCF_009912015.1	0	reads	2883284	288328400	100	103	94.83	76	2764881	293042	32.8
SRR5250296	MMMOSAM:9b8d3ebf-a1e5-4abb-bd58-10c0591bcc02	PRJNA369475	SAMN06327702	Young BC	2017	29256859	WHM-2017-01-099			nose	colonising	0	239	Yes	0	0	0	GCF_013389715.1	0	reads	3929566	593364466	151	212	91.06	135	2918478	105168	32.72
SRR5250366	MMMOSAM:89582559-7ce2-4889-83e8-0c603058a91c	PRJNA369475	SAMN06327772	Young BC	2017	29256859	WHM-2017-01-099			nose	colonising	0	239	Yes	0	0	0	GCF_013389715.1	0	reads	2665438	402481138	151	144	91.55	110	2917599	107453	32.72
SRR5250385	MMMOSAM:84e568f7-fd4d-4e6e-8d0b-b1cf69a36801	PRJNA369475	SAMN06327791	Young BC	2017	29256859	WHM-2017-01-099			nose	colonising	0	239	Yes	1	1	1	GCF_013389715.1	0	reads	3782092	571095892	151	204	91.22	127	2917857	105168	32.72
SRR5250390	MMMOSAM:839b9d39-00c2-4255-88f2-3afca86db868	PRJNA369475	SAMN06327796	Young BC	2017	29256859	WHM-2017-01-099			bone	invasive	4	239	Yes	4	4	4	GCF_013389715.1	0	reads	2948872	445279672	151	159	91.33	120	2917835	105168	32.72
SRR5250453	MMMOSAM:75ed1b74-2a22-47cd-bed0-cc14a816cada	PRJNA369475	SAMN06327859	Young BC	2017	29256859	WHM-2017-01-099			nose	colonising	0	239	Yes	0	0	0	GCF_013389715.1	0	reads	3062664	462462264	151	165	91.39	128	2919482	105168	32.72
SRR5250680	MMMOSAM:465248f1-d24f-429e-ac6e-ecc622c52e26	PRJNA369475	SAMN06328086	Young BC	2017	29256859	WHM-2017-01-099			bone	invasive	4	239	Yes	4	4	4	GCF_013389715.1	0	reads	3186350	481138850	151	172	91.01	122	2918085	107453	32.72
SRR5250731	MMMOSAM:3b3f3bf3-80d5-4b4f-9f17-cef506caaad5	PRJNA369475	SAMN06328137	Young BC	2017	29256859	WHM-2017-01-099			bone	invasive	4	239	Yes	4	4	4	GCF_013389715.1	0	reads	4008958	605352658	151	217	90.98	128	2917882	105168	32.72
SRR5250767	MMMOSAM:314a5214-51a8-4521-9794-dc740838f0bd	PRJNA369475	SAMN06328173	Young BC	2017	29256859	WHM-2017-01-099	Yes		nose	colonising	0	239	Yes				GCF_013389715.1	0	reads	2916294	440360394	151	157	91.35	127	2918693	105168	32.72
SRR5250800	MMMOSAM:2b9571e1-39e9-47a6-ac72-b37f2224250c	PRJNA369475	SAMN06328206	Young BC	2017	29256859	WHM-2017-01-099			bone	invasive	4	239	Yes	3	3	3	GCF_013389715.1	0	reads	3357306	506953206	151	181	91.25	131	2918549	105168	32.72
SRR5251374	MMMOSAM:0c2f8b5f-133d-406d-a9fc-25cff75eb3d4	PRJNA369475	SAMN06328744	Young BC	2017	29256859	WHM-2017-01-099		Yes	bone	invasive	4	239	Yes	4	4	4	GCF_013389715.1	0	reads	2771624	418515224	151	150	91.32	119	2918021	105168	32.72
SRR5249857	MMMOSAM:fbade3b7-eb78-4f69-9e0b-43ce13a21076	PRJNA369475	SAMN06327263	Young BC	2017	29256859	WHM-2017-01-100			nose	colonising	0	582		3	0	0	GCF_009912295.1	0	reads	3213740	485274740	151	174	97.33	82	2744285	243722	32.72
SRR5250116	MMMOSAM:c5ce3e06-d24e-4673-b38b-d4a7953f0217	PRJNA369475	SAMN06327522	Young BC	2017	29256859	WHM-2017-01-100			nose	colonising	0	582		4	1	1	GCF_009912295.1	0	reads	2489396	375898796	151	134	97.88	80	2743760	249934	32.71
SRR5250134	MMMOSAM:bfc3e845-546f-4689-a756-9ba5b39a7861	PRJNA369475	SAMN06327540	Young BC	2017	29256859	WHM-2017-01-100			bone	invasive	1	582		3	0	0	GCF_009912295.1	0	reads	3478896	525313296	151	188	97.42	85	2744300	237849	32.72
SRR5250499	MMMOSAM:6c38b320-2b95-48ec-9db5-e0697d38e22e	PRJNA369475	SAMN06327905	Young BC	2017	29256859	WHM-2017-01-100	Yes		nose	colonising	0	582					GCF_009912295.1	0	reads	3839412	579751212	151	207	97.39	74	2744056	389766	32.72
SRR5250569	MMMOSAM:5e0fb515-5c32-4b8e-b232-5acbdef015a0	PRJNA369475	SAMN06327975	Young BC	2017	29256859	WHM-2017-01-100			bone	invasive	1	582		3	0	0	GCF_009912295.1	0	reads	3715138	560985838	151	201	97.48	89	2744825	249934	32.72
SRR5250706	MMMOSAM:3f1ea70c-7fb1-4d94-bad9-39e4851b620f	PRJNA369475	SAMN06328112	Young BC	2017	29256859	WHM-2017-01-100			bone	invasive	1	582		3	0	0	GCF_009912295.1	0	reads	3288896	496623296	151	178	97.56	79	2743850	243722	32.72
SRR5250712	MMMOSAM:3e6256b0-61ec-4fde-965b-d378eccd8a0c	PRJNA369475	SAMN06328118	Young BC	2017	29256859	WHM-2017-01-100		Yes	bone	invasive	1	582		3	0	0	GCF_009912295.1	0	reads	3263130	492732630	151	176	97.56	83	2744649	249934	32.72
SRR5250732	MMMOSAM:3aa96081-a74b-436c-bb47-822b84910959	PRJNA369475	SAMN06328138	Young BC	2017	29256859	WHM-2017-01-100			nose	colonising	0	582		3	0	0	GCF_009912295.1	0	reads	3275938	494666638	151	177	97.45	99	2750429	243722	32.72
SRR5250782	MMMOSAM:2f1ae770-0739-4f2f-a76c-79aa21730d83	PRJNA369475	SAMN06328188	Young BC	2017	29256859	WHM-2017-01-100			nose	colonising	0	582		4	1	1	GCF_009912295.1	0	reads	4091388	617799588	151	221	97.43	76	2744217	329232	32.72
SRR5251268	MMMOSAM:20b9c1ae-6252-4821-bef9-d342a8c6b892	PRJNA369475	SAMN06328638	Young BC	2017	29256859	WHM-2017-01-100			bone	invasive	1	582		3	0	0	GCF_009912295.1	0	reads	3098874	467929974	151	167	97.48	81	2744204	243722	32.72
SRR5249842	MMMOSAM:fe6f881d-af0c-4082-a5fc-f0c9f4e7c3a2	PRJNA369475	SAMN06327248	Young BC	2017	29256859	WHM-2017-01-101			nose	colonising	0	45		0	0	0	GCF_009912875.1	0	reads	3092846	467019746	151	167	96.76	49	2720099	407494	32.77
SRR5249872	MMMOSAM:f83e953e-9e42-4e5c-b367-ab1d9cbc2651	PRJNA369475	SAMN06327278	Young BC	2017	29256859	WHM-2017-01-101		Yes	skin	invasive	-2	45		7	7	7	GCF_009912875.1	0	reads	3637822	549311122	151	196	96.97	55	2720757	407504	32.78
SRR5250173	MMMOSAM:b68dde30-97d2-4d91-8232-b320220556e2	PRJNA369475	SAMN06327579	Young BC	2017	29256859	WHM-2017-01-101	Yes		nose	colonising	0	45					GCF_009912875.1	0	reads	3408168	514633368	151	184	97.25	40	2718808	407504	32.77
SRR5250414	MMMOSAM:7de013f4-f5ec-49b6-a30f-857f8b584043	PRJNA369475	SAMN06327820	Young BC	2017	29256859	WHM-2017-01-101			nose	colonising	0	45		5	5	5	GCF_009912875.1	0	reads	2890584	436478184	151	156	97.41	38	2718278	407504	32.76
SRR5250586	MMMOSAM:5af863e4-973d-4d48-93ee-07029bc12939	PRJNA369475	SAMN06327992	Young BC	2017	29256859	WHM-2017-01-101			skin	invasive	-2	45		10	10	10	GCF_009912875.1	0	reads	2601528	392830728	151	140	97.32	35	2718095	407494	32.76
SRR5250594	MMMOSAM:58b2632e-5a63-439f-b01e-5d1bd75d3d23	PRJNA369475	SAMN06328000	Young BC	2017	29256859	WHM-2017-01-101			skin	invasive	-2	45		12	12	12	GCF_009912875.1	0	reads	3224266	486864166	151	174	96.89	47	2719543	407494	32.77
SRR5250603	MMMOSAM:57350c92-94cf-4498-a2e4-4c18563eee0f	PRJNA369475	SAMN06328009	Young BC	2017	29256859	WHM-2017-01-101			skin	invasive	-2	45		8	8	8	GCF_009912875.1	0	reads	2864400	432524400	151	155	97.16	39	2718603	315382	32.76
SRR5250685	MMMOSAM:45b0f1b5-b4fd-402b-8ae2-e7f57bf52d20	PRJNA369475	SAMN06328091	Young BC	2017	29256859	WHM-2017-01-101			skin	invasive	-2	45		10	10	10	GCF_009912875.1	0	reads	3466496	523440896	151	187	96.92	42	2719328	407494	32.77
SRR5250742	MMMOSAM:3887103d-9a3b-4933-a2f6-91ce021b83ac	PRJNA369475	SAMN06328148	Young BC	2017	29256859	WHM-2017-01-101			nose	colonising	0	45		71	71	71	GCF_009912875.1	0	reads	2828258	427066958	151	153	94.93	56	2749362	237483	32.72
SRR5250786	MMMOSAM:2e628629-d7be-42da-b9c4-c2547026a3db	PRJNA369475	SAMN06328192	Young BC	2017	29256859	WHM-2017-01-101			nose	colonising	0	45		1	1	1	GCF_009912875.1	0	reads	3175634	479520734	151	171	97.07	50	2720034	407504	32.77
SRR5249858	MMMOSAM:fb7777c8-1aa6-42ef-aec5-85137cef5008	PRJNA369475	SAMN06327264	Young BC	2017	29256859	WHM-2017-01-102			nose	colonising	0	-		1	1	0	GCF_003354865.1	0	reads	3314558	500498258	151	179	95.53	68	2730150	249930	32.72
SRR5249979	MMMOSAM:e0f2f125-13fe-4dd7-9576-2e2d64d926e7	PRJNA369475	SAMN06327385	Young BC	2017	29256859	WHM-2017-01-102			nose	colonising	0	-		0	0	0	GCF_003354865.1	0	reads	3042444	459409044	151	164	95.31	61	2730115	237953	32.72
SRR5250133	MMMOSAM:bfeb44d5-0454-42d0-adab-223b9c29db04	PRJNA369475	SAMN06327539	Young BC	2017	29256859	WHM-2017-01-102			nose	colonising	0	-		0	0	0	GCF_003354865.1	0	reads	2701402	407911702	151	146	94.98	57	2729678	243760	32.72
SRR5250726	MMMOSAM:3c17bcff-6375-4400-a48f-20e4a9c6ab15	PRJNA369475	SAMN06328132	Young BC	2017	29256859	WHM-2017-01-102	Yes		nose	colonising	0	-					GCF_003354865.1	0	reads	2983834	450558934	151	161	94.79	67	2730302	237953	32.72
SRR5250761	MMMOSAM:32b4ce07-d6b7-4739-abc1-37fc7cc54e3c	PRJNA369475	SAMN06328167	Young BC	2017	29256859	WHM-2017-01-102			nose	colonising	0	-		0	0	0	GCF_003354865.1	0	reads	3093388	467101588	151	167	95.28	63	2730091	243098	32.72
SRR5250008	MMMOSAM:daa7d923-8ee9-456c-ae2b-a30f0c94bb57	PRJNA369475	SAMN06327414	Young BC	2017	29256859	WHM-2017-01-103			bone	invasive	22	8	Yes	14	12	12	GCF_001018735.2	0	reads	3274264	494413864	151	177	94.41	93	2846624	358194	32.7
SRR5250058	MMMOSAM:d115ee88-849d-44ad-92c9-ab575869d564	PRJNA369475	SAMN06327464	Young BC	2017	29256859	WHM-2017-01-103			nose	colonising	0	8	Yes	3	1	1	GCF_001018735.2	0	reads	3754788	566972988	151	203	94.71	95	2846325	250543	32.7
SRR5250081	MMMOSAM:cc5fe5df-665d-4161-8e57-6bd12918aa0e	PRJNA369475	SAMN06327487	Young BC	2017	29256859	WHM-2017-01-103			nose	colonising	0	8	Yes	1	0	0	GCF_001018735.2	0	reads	3261736	492522136	151	176	94.39	101	2847535	284700	32.7
SRR5250139	MMMOSAM:be6949eb-f6ea-4614-ba5e-8ca10afe17e1	PRJNA369475	SAMN06327545	Young BC	2017	29256859	WHM-2017-01-103			nose	colonising	0	8	Yes	2	0	0	GCF_001018735.2	0	reads	2753988	415852188	151	149	94.63	104	2847637	284682	32.7
SRR5250287	MMMOSAM:9d9bb75b-fe82-468b-aeb0-13f5a345a262	PRJNA369475	SAMN06327693	Young BC	2017	29256859	WHM-2017-01-103			bone	invasive	22	8	Yes	12	12	12	GCF_001018735.2	0	reads	4280324	646328924	151	231	94.22	108	2848178	284698	32.7
SRR5250357	MMMOSAM:8cb4fec6-5876-40d5-833f-db6d781c7dd0	PRJNA369475	SAMN06327763	Young BC	2017	29256859	WHM-2017-01-103			nose	colonising	0	8	Yes	3	1	1	GCF_001018735.2	0	reads	2297258	346885958	151	124	94.96	79	2845976	401885	32.7
SRR5250774	MMMOSAM:3057614b-f0e9-44ad-99f9-3dd55fc9adcb	PRJNA369475	SAMN06328180	Young BC	2017	29256859	WHM-2017-01-103	Yes		nose	colonising	0	8	Yes				GCF_001018735.2	0	reads	3758206	567489106	151	203	94.37	74	2845317	362948	32.7
SRR5250827	MMMOSAM:2470c1e1-6e95-4605-93a3-ee3827b8230c	PRJNA369475	SAMN06328233	Young BC	2017	29256859	WHM-2017-01-103		Yes	bone	invasive	22	8	Yes	14	12	12	GCF_001018735.2	0	reads	2811726	424570626	151	152	94.7	88	2845725	285181	32.7
SRR5251351	MMMOSAM:106c482f-4ddf-4da7-b3df-1c69f28dc384	PRJNA369475	SAMN06328721	Young BC	2017	29256859	WHM-2017-01-103			bone	invasive	22	8	Yes	14	12	12	GCF_001018735.2	0	reads	2820076	425831476	151	152	94.36	84	2846322	250525	32.7
SRR5250099	MMMOSAM:c8c908db-26d4-43fa-adb8-47dbf1e2c12d	PRJNA369475	SAMN06327505	Young BC	2017	29256859	WHM-2017-01-104			nose	colonising	0	582		3	2	2	GCF_009912415.1	0	reads	3218224	485951824	151	174	95.05	78	2769553	249933	32.76
SRR5250144	MMMOSAM:bd7e040a-ee96-43b3-814c-fff9ff0e5510	PRJNA369475	SAMN06327550	Young BC	2017	29256859	WHM-2017-01-104			nose	colonising	0	582		2	1	1	GCF_009912415.1	0	reads	2833090	427796590	151	153	95.97	86	2768062	249933	32.77
SRR5250179	MMMOSAM:b4970cb0-386f-40dd-816d-179f7b37ea89	PRJNA369475	SAMN06327585	Young BC	2017	29256859	WHM-2017-01-104			bone	invasive	10	582		4	3	2	GCF_009912415.1	0	reads	3462922	522901222	151	187	95.43	80	2773936	249933	32.76
SRR5250355	MMMOSAM:8d059e16-84a9-4809-a12d-be9d2a14ef6d	PRJNA369475	SAMN06327761	Young BC	2017	29256859	WHM-2017-01-104	Yes		nose	colonising	0	582					GCF_009912415.1	0	reads	3075028	464329228	151	166	95.18	80	2769546	249933	32.76
SRR5250359	MMMOSAM:8c272828-1c28-47b3-a182-e202c935c995	PRJNA369475	SAMN06327765	Young BC	2017	29256859	WHM-2017-01-104			nose	colonising	0	582		8	7	3	GCF_009912415.1	0	reads	2746138	414666838	151	148	95.29	81	2769402	249933	32.76
SRR5250380	MMMOSAM:85559f1c-071c-4dbf-bb3a-0abf48fd7b7f	PRJNA369475	SAMN06327786	Young BC	2017	29256859	WHM-2017-01-104		Yes	bone	invasive	10	582		4	3	2	GCF_009912415.1	0	reads	3555718	536913418	151	192	95.04	82	2770111	315702	32.77
SRR5250478	MMMOSAM:71071fc3-3c61-42d7-a584-636ac0bfbe01	PRJNA369475	SAMN06327884	Young BC	2017	29256859	WHM-2017-01-104			bone	invasive	10	582		3	2	2	GCF_009912415.1	0	reads	3268526	493547426	151	176	95.28	80	2769982	249270	32.76
SRR5250715	MMMOSAM:3e05457a-9bfb-4d5f-ae85-3622477b2cf7	PRJNA369475	SAMN06328121	Young BC	2017	29256859	WHM-2017-01-104			bone	invasive	10	582		3	2	2	GCF_009912415.1	0	reads	3419674	516370774	151	185	94.82	86	2770928	249933	32.77
SRR5251271	MMMOSAM:204035e4-aded-44ed-9167-e941668dd85f	PRJNA369475	SAMN06328641	Young BC	2017	29256859	WHM-2017-01-104			nose	colonising	0	582		1	0	0	GCF_009912415.1	0	reads	3295260	497584260	151	178	95.28	80	2769457	249933	32.76
SRR5251347	MMMOSAM:10ef1e96-e78c-4c66-ab05-f88a66130fee	PRJNA369475	SAMN06328717	Young BC	2017	29256859	WHM-2017-01-104			bone	invasive	10	582		3	2	2	GCF_009912415.1	0	reads	2997056	452555456	151	162	95.32	87	2770303	249933	32.76
SRR5250151	MMMOSAM:bbc64775-5f0e-411c-8e98-6eb53c5415f2	PRJNA369475	SAMN06327557	Young BC	2017	29256859	WHM-2017-01-105			nose	colonising	0	97		6	6	6	GCF_900635305.1	0	reads	3295856	497674256	151	178	96.12	39	2775972	672481	32.73
SRR5250268	MMMOSAM:a0a9fb4f-3ade-4218-88c6-f49fbcb1ae34	PRJNA369475	SAMN06327674	Young BC	2017	29256859	WHM-2017-01-105			nose	colonising	0	97		3	3	3	GCF_900635305.1	0	reads	2701982	407999282	151	146	96.11	45	2777066	286973	32.74
SRR5250534	MMMOSAM:65431a50-59e3-4194-a4bc-2e4395332d3a	PRJNA369475	SAMN06327940	Young BC	2017	29256859	WHM-2017-01-105			skin	invasive	3	97		11	11	11	GCF_900635305.1	0	reads	3442180	519769180	151	186	96.38	39	2776109	672481	32.73
SRR5250658	MMMOSAM:4be33f77-d4be-4461-824c-8d4042e1d707	PRJNA369475	SAMN06328064	Young BC	2017	29256859	WHM-2017-01-105			nose	colonising	0	97		6	6	6	GCF_900635305.1	0	reads	3111064	469770664	151	168	95.92	43	2776937	286973	32.74
SRR5250713	MMMOSAM:3e410e83-bb8a-467f-ad2b-e02b63b6242c	PRJNA369475	SAMN06328119	Young BC	2017	29256859	WHM-2017-01-105			skin	invasive	3	97		11	11	11	GCF_900635305.1	0	reads	2851728	430610928	151	154	96.48	39	2775971	672481	32.73
SRR5250779	MMMOSAM:2f72591d-bcc7-4afe-98e4-385e0db0071e	PRJNA369475	SAMN06328185	Young BC	2017	29256859	WHM-2017-01-105		Yes	skin	invasive	3	97		12	12	12	GCF_900635305.1	0	reads	2069866	312549766	151	112	96.62	41	2776557	672612	32.73
SRR5251289	MMMOSAM:1d07e6e4-8503-43e7-8cf1-40e9d7d35f6e	PRJNA369475	SAMN06328659	Young BC	2017	29256859	WHM-2017-01-105			skin	invasive	3	97		11	11	11	GCF_900635305.1	0	reads	3473606	524514506	151	188	95.97	55	2780371	286973	32.73
SRR5251296	MMMOSAM:1bbec8f2-3d6d-47cb-8bab-60c426268f42	PRJNA369475	SAMN06328666	Young BC	2017	29256859	WHM-2017-01-105	Yes		nose	colonising	0	97					GCF_900635305.1	0	reads	3403892	513987692	151	184	96.3	46	2776139	286973	32.73
SRR5251325	MMMOSAM:177eaec5-d8ee-44aa-8789-ad1360504c4e	PRJNA369475	SAMN06328695	Young BC	2017	29256859	WHM-2017-01-105			skin	invasive	3	97		11	11	11	GCF_900635305.1	0	reads	2540998	383690698	151	137	96.11	54	2778325	293217	32.74
SRR5251340	MMMOSAM:127eb248-aeed-44fe-b47e-f01cfd014741	PRJNA369475	SAMN06328710	Young BC	2017	29256859	WHM-2017-01-105			nose	colonising	0	97		6	6	6	GCF_900635305.1	0	reads	3203184	483680784	151	173	95.86	52	2777884	286973	32.74
SRR6762207	Lim R1	PRJNA434495	SAMN08563480	Rouard C	2018	30275089	WHM-2018-02-001			cystic fibrosis	colonising	432	72	Yes	78	75	74	GCF_002214665.1	0	reads	3349932	614128889	183	220	91.85	58	2742121	272521	32.72
SRR6762204	Lim R3	PRJNA434495	SAMN08563481	Rouard C	2018	30275089	WHM-2018-02-001			cystic fibrosis	colonising	1151	72	Yes	46	43	42	GCF_002214665.1	0	reads	4134012	669610778	161	240	93.03	58	2740916	268125	32.72
SRR6762206	Lim S	PRJNA434495	SAMN08563479	Rouard C	2018	30275089	WHM-2018-02-001	Yes		cystic fibrosis	colonising	0	72	Yes				GCF_002214665.1	0	reads	4571306	726308324	158	260	93.88	57	2740296	268125	32.72
ERR2118972	t012#00	PRJEB22600	SAMEA104289927	Langhanki L	2018	30348081	WHM-2018-03-001			cystic fibrosis	colonising	1095	30		21	19	19	GCF_013467165.1	0	reads	4774470	482221470	101	172	93.33	127	2890163	181459	32.72
ERR2118832	t012#97	PRJEB22600	SAMEA104289887	Langhanki L	2018	30348081	WHM-2018-03-001	Yes		cystic fibrosis	colonising	0	30					GCF_013467165.1	0	reads	7911730	735790890	93	263	92.26	119	2858368	168725	32.74
GCF_003354905.1	78	PRJNA393749	SAMN07340892	Altman DR	2018	30061376	WHM-2018-04-035	Yes		nose	colonising		121					GCF_003354905.1	0	assembly						2	2853623	2814270	32.8
GCF_003354545.1	27	PRJNA393749	SAMN07340891	Altman DR	2018	30061376	WHM-2018-04-035		Yes	blood	invasive		121		2	2	2	GCF_003354905.1	0	assembly						1	2814328	2814328	32.87
GCF_003425885.1	82	PRJNA393749	SAMN08997831	Altman DR	2018	30061376	WHM-2018-04-036	Yes		nose	colonising		8					GCF_003425885.1	0	assembly						3	2840232	2823570	32.79
GCF_003425835.1	28	PRJNA393749	SAMN08997832	Altman DR	2018	30061376	WHM-2018-04-036		Yes	blood	invasive		8		2	2	2	GCF_003425885.1	0	assembly						3	2841780	2823570	32.78
GCF_003354925.1	135	PRJNA393749	SAMN07340894	Altman DR	2018	30061376	WHM-2018-04-045	Yes		nose	colonising		15					GCF_003354925.1	0	assembly						2	2751719	2730989	32.84
GCF_003354865.1	45	PRJNA393749	SAMN07340893	Altman DR	2018	30061376	WHM-2018-04-045		Yes	blood	invasive		15		1	1	1	GCF_003354925.1	0	assembly						2	2751719	2730989	32.84
GCF_003354765.1	191	PRJNA393749	SAMN07340898	Altman DR	2018	30061376	WHM-2018-04-060	Yes		nose	colonising		228	Yes				GCF_003354765.1	0	assembly						1	2911744	2911744	32.9
GCF_003354705.1	61	PRJNA393749	SAMN07340897	Altman DR	2018	30061376	WHM-2018-04-060		Yes	blood	invasive		228	Yes	5	5	5	GCF_003354765.1	0	assembly						1	2911744	2911744	32.9
GCF_003425915.1	64	PRJNA393749	SAMN08997834	Altman DR	2018	30061376	WHM-2018-04-063	Yes		nose	colonising		-					GCF_003425915.1	0	assembly						3	2896441	2875880	32.81
GCF_003425545.1	199	PRJNA393749	SAMN08997833	Altman DR	2018	30061376	WHM-2018-04-063		Yes	blood	invasive		-		3	3	3	GCF_003425915.1	0	assembly						3	2896441	2875880	32.81
GCF_003354785.1	85	PRJNA393749	SAMN07340899	Altman DR	2018	30061376	WHM-2018-04-073		Yes	blood	invasive		30		27	27	27	GCF_003354685.1	0	assembly						1	2806113	2806113	32.8
GCF_003354685.1	277	PRJNA393749	SAMN07340900	Altman DR	2018	30061376	WHM-2018-04-073	Yes		nose	colonising		30					GCF_003354685.1	0	assembly						1	2805047	2805047	32.8
GCF_003354645.1	128	PRJNA393749	SAMN07340901	Altman DR	2018	30061376	WHM-2018-04-108		Yes	blood	invasive		121		3	3	3	GCF_003354605.1	0	assembly						1	2824809	2824816	32.91
GCF_003354605.1	422	PRJNA393749	SAMN07340902	Altman DR	2018	30061376	WHM-2018-04-108	Yes		nose	colonising		121					GCF_003354605.1	0	assembly						1	2824814	2824814	32.91
GCF_003354725.1	143	PRJNA393749	SAMN07340903	Altman DR	2018	30061376	WHM-2018-04-117			blood	invasive		30		5	5	5	GCF_003354745.1	0	assembly						1	2813908	2813908	32.82
GCF_003354745.1	466	PRJNA393749	SAMN07340905	Altman DR	2018	30061376	WHM-2018-04-117	Yes		nose	colonising		30					GCF_003354745.1	0	assembly						1	2813964	2813964	32.82
GCF_003354625.1	468	PRJNA393749	SAMN07340904	Altman DR	2018	30061376	WHM-2018-04-117		Yes	central nervous system	invasive		30		4	4	4	GCF_003354745.1	0	assembly						1	2813963	2813963	32.82
GCF_003354965.1	546	PRJNA393749	SAMN07340907	Altman DR	2018	30061376	WHM-2018-04-135		Yes	skin	invasive		254	Yes	7	7	7	GCF_003354945.1	0	assembly						2	2920487	2892914	32.87
GCF_003354945.1	545	PRJNA393749	SAMN07340908	Altman DR	2018	30061376	WHM-2018-04-135	Yes		nose	colonising		254	Yes				GCF_003354945.1	0	assembly						2	2961703	2935463	32.91
GCF_003354665.1	165	PRJNA393749	SAMN07340906	Altman DR	2018	30061376	WHM-2018-04-135			blood	invasive		254	Yes	8	8	8	GCF_003354945.1	0	assembly						1	2892907	2892907	32.9
GCF_003354985.1	628	PRJNA393749	SAMN07340911	Altman DR	2018	30061376	WHM-2018-04-152	Yes		nose	colonising		228	Yes				GCF_003354985.1	0	assembly						1	2911773	2911773	32.9
GCF_003354585.1	629	PRJNA393749	SAMN07340910	Altman DR	2018	30061376	WHM-2018-04-152		Yes	skin	invasive		228	Yes	6	6	6	GCF_003354985.1	0	assembly						1	2913334	2913334	32.9
GCF_003354565.1	187	PRJNA393749	SAMN07340909	Altman DR	2018	30061376	WHM-2018-04-152			blood	invasive		228	Yes	6	6	6	GCF_003354985.1	0	assembly						1	2913163	2913163	32.9
ERR2137016	BPH2704	PRJEB27932	SAMEA104317316	Giulieri SG	2018	30103826	WHM-2018-05-001	Yes	Yes	blood	invasive	0	93	Yes				GCF_003609895.1	0	reads	1626306	309805307	190	111	93.41	51	2808359	645672	32.68
ERR2137017	BPH2705	PRJEB27932	SAMEA104317317	Giulieri SG	2018	30103826	WHM-2018-05-001			blood	invasive	10	93	Yes	0	0	0	GCF_003609895.1	0	reads	819346	186774690	227	66	94.52	66	2808200	152614	32.69
ERR2137020	BPH2708	PRJEB27932	SAMEA104317320	Giulieri SG	2018	30103826	WHM-2018-05-002	Yes	Yes	blood	invasive	0	97					GCF_005153305.1	0	reads	1285392	258525017	201	92	95.7	43	2725709	281495	32.72
ERR2137021	BPH2709	PRJEB27932	SAMEA104317321	Giulieri SG	2018	30103826	WHM-2018-05-002			blood	invasive	5	97		0	0	0	GCF_005153305.1	0	reads	582800	137040513	235	49	96.6	47	2723339	183743	32.72
ERR2137040	BPH2728	PRJEB27932	SAMEA104317340	Giulieri SG	2018	30103826	WHM-2018-05-003		Yes	blood	invasive	13	45	Yes	63	62	0	GCF_900323925.1	0	reads	1018844	206258044	202	73	93.42	75	2812313	168321	32.7
ERR2137041	BPH2729	PRJEB27932	SAMEA104317341	Giulieri SG	2018	30103826	WHM-2018-05-003			blood	invasive	38	45	Yes	76	75	5	GCF_900323925.1	0	reads	851948	155913488	183	55	91.88	82	2812248	182900	32.7
ERR2137042	BPH2730	PRJEB27932	SAMEA104317342	Giulieri SG	2018	30103826	WHM-2018-05-003	Yes		nose	colonising	-13	45	Yes				GCF_900323925.1	0	reads	690342	158081735	228	56	94.42	153	2793654	51788	32.75
ERR2137044	BPH2732	PRJEB27932	SAMEA104317344	Giulieri SG	2018	30103826	WHM-2018-05-004	Yes		blood	invasive	0	45					GCF_009912375.1	0	reads	876516	175515567	200	62	94.43	50	2750970	295868	32.81
ERR2137045	BPH2733	PRJEB27932	SAMEA104317345	Giulieri SG	2018	30103826	WHM-2018-05-004			blood	invasive	4	45		6	5	0	GCF_009912375.1	0	reads	979392	233553075	238	83	95.76	113	2762217	158532	32.87
ERR2137049	BPH2737	PRJEB27932	SAMEA104317349	Giulieri SG	2018	30103826	WHM-2018-05-005	Yes	Yes	blood	invasive	0	-					GCF_001611325.1	0	reads	1003418	223220361	222	80	94.34	112	2805362	95685	32.8
ERR2137050	BPH2738	PRJEB27932	SAMEA104317350	Giulieri SG	2018	30103826	WHM-2018-05-005			blood	invasive	18	-		5	4	1	GCF_001611325.1	0	reads	584622	135635523	232	48	94.64	157	2790837	47358	32.84
ERR2137062	BPH2750	PRJEB27932	SAMEA104317362	Giulieri SG	2018	30103826	WHM-2018-05-007	Yes	Yes	blood	invasive	0	39					GCF_003354625.1	0	reads	781970	165317324	211	59	93.9	78	2776719	121824	32.79
ERR2137063	BPH2751	PRJEB27932	SAMEA104317363	Giulieri SG	2018	30103826	WHM-2018-05-007			blood	invasive	4	39		7	7	2	GCF_003354625.1	0	reads	1026678	199829702	194	71	93.66	63	2779588	133225	32.78
ERR2137066	BPH2754	PRJEB27932	SAMEA104317366	Giulieri SG	2018	30103826	WHM-2018-05-008	Yes	Yes	blood	invasive	0	5					GCF_900620225.1	0	reads	669984	155636527	232	55	96.69	67	2729919	137892	32.73
ERR2137067	BPH2755	PRJEB27932	SAMEA104317367	Giulieri SG	2018	30103826	WHM-2018-05-008			blood	invasive	3	5		27	27	0	GCF_900620225.1	0	reads	1003910	194868856	194	69	95.41	46	2731461	243818	32.72
ERR2137088	BPH2777	PRJEB27932	SAMEA104317388	Giulieri SG	2018	30103826	WHM-2018-05-009	Yes	Yes	blood	invasive	0	30					GCF_002633785.1	0	reads	4775558	716333700	150	256	93.77	79	2860613	141913	32.74
ERR2137089	BPH2778	PRJEB27932	SAMEA104317389	Giulieri SG	2018	30103826	WHM-2018-05-009			blood	invasive	3	30		0	0	0	GCF_002633785.1	0	reads	2204658	330698700	150	118	93.87	79	2860492	141913	32.74
ERR2137112	BPH2801	PRJEB27932	SAMEA104317412	Giulieri SG	2018	30103826	WHM-2018-05-010	Yes	Yes	blood	invasive	0	59					GCF_004772055.1	0	reads	3766868	565030200	150	202	96.53	64	2728027	154156	32.75
ERR2137114	BPH2803	PRJEB27932	SAMEA104317414	Giulieri SG	2018	30103826	WHM-2018-05-010			blood	invasive	31	59		27	27	25	GCF_004772055.1	0	reads	541780	127857597	236	45	96.42	55	2715602	184141	32.76
ERR2137126	BPH2819	PRJEB27932	SAMEA104317426	Giulieri SG	2018	30103826	WHM-2018-05-011	Yes	Yes	blood	invasive	0	5					GCF_900620225.1	0	reads	4064902	609735300	150	218	92.89	69	2745257	222893	32.74
ERR2137127	BPH2820	PRJEB27932	SAMEA104317427	Giulieri SG	2018	30103826	WHM-2018-05-011			blood	invasive	3	5		2	2	2	GCF_900620225.1	0	reads	3321066	498159900	150	178	96.71	43	2730123	222893	32.7
ERR2137145	BPH2840	PRJEB27932	SAMEA104317445	Giulieri SG	2018	30103826	WHM-2018-05-012	Yes	Yes	blood	invasive	0	8					GCF_009912915.1	0	reads	1090772	228466623	209	81	94.76	53	2825853	597573	32.64
ERR2137146	BPH2841	PRJEB27932	SAMEA104317446	Giulieri SG	2018	30103826	WHM-2018-05-012			blood	invasive	5	8		7	6	0	GCF_009912915.1	0	reads	3023822	456597122	151	163	95.84	52	2826600	550766	32.64
ERR2137165	BPH2861	PRJEB27932	SAMEA104317465	Giulieri SG	2018	30103826	WHM-2018-05-013	Yes	Yes	blood	invasive	0	39					GCF_003855575.1	0	reads	3431580	514737000	150	184	93.01	57	2736130	175267	32.76
ERR2137166	BPH2862	PRJEB27932	SAMEA104317466	Giulieri SG	2018	30103826	WHM-2018-05-013			blood	invasive	3	39		1	1	1	GCF_003855575.1	0	reads	1188324	207825577	174	74	93.92	69	2725562	126715	32.75
ERR2137167	BPH2863	PRJEB27932	SAMEA104317467	Giulieri SG	2018	30103826	WHM-2018-05-014	Yes	Yes	blood	invasive	0	3381					GCF_009912675.1	0	reads	948062	192679732	203	69	94.43	70	2803193	145359	32.71
ERR2137168	BPH2864	PRJEB27932	SAMEA104317468	Giulieri SG	2018	30103826	WHM-2018-05-014			blood	invasive	4	3381		4	4	0	GCF_009912675.1	0	reads	1500996	274372888	182	98	93.66	75	2803152	145359	32.72
ERR2137175	BPH2872	PRJEB27932	SAMEA104317475	Giulieri SG	2018	30103826	WHM-2018-05-015	Yes	Yes	blood	invasive	0	-					GCF_009911855.1	0	reads	3582358	537353700	150	192	95.34	69	2797785	202660	32.71
ERR2137176	BPH2873	PRJEB27932	SAMEA104317476	Giulieri SG	2018	30103826	WHM-2018-05-015			blood	invasive	5	-		0	0	0	GCF_009911855.1	0	reads	4765224	714783600	150	256	95.31	56	2796262	378535	32.71
ERR2137185	BPH2883	PRJEB27932	SAMEA104317485	Giulieri SG	2018	30103826	WHM-2018-05-016	Yes	Yes	blood	invasive	0	5					GCF_002633865.1	0	reads	748996	168284905	224	60	96.39	51	2735766	188421	32.7
ERR2137186	BPH2884	PRJEB27932	SAMEA104317486	Giulieri SG	2018	30103826	WHM-2018-05-016			blood	invasive	5	5		26	24	0	GCF_002633865.1	0	reads	4253512	642280312	151	230	97.03	52	2737042	359742	32.7
ERR2137189	BPH2887	PRJEB27932	SAMEA104317489	Giulieri SG	2018	30103826	WHM-2018-05-017	Yes	Yes	blood	invasive	0	45	Yes				GCF_900323925.1	0	reads	3187412	481299212	151	172	92.44	122	2915594	197141	32.73
ERR2137190	BPH2888	PRJEB27932	SAMEA104317490	Giulieri SG	2018	30103826	WHM-2018-05-017			blood	invasive	6	45	Yes	1	0	0	GCF_900323925.1	0	reads	2947042	445003342	151	159	92.59	125	2913417	157026	32.73
ERR2137198	BPH2897	PRJEB27932	SAMEA104317498	Giulieri SG	2018	30103826	WHM-2018-05-018	Yes	Yes	blood	invasive	0	34					GCF_009912475.1	0	reads	2938770	443754270	151	159	95.16	69	2808891	150281	32.72
ERR2137199	BPH2898	PRJEB27932	SAMEA104317499	Giulieri SG	2018	30103826	WHM-2018-05-018			blood	invasive	3	34		3	2	0	GCF_009912475.1	0	reads	601130	156201538	259	56	94.84	66	2810848	154491	32.72
ERR2137239	BPH2942	PRJEB27932	SAMEA104317539	Giulieri SG	2018	30103826	WHM-2018-05-021	Yes	Yes	blood	invasive	0	5					GCF_900620225.1	0	reads	1452102	345489578	237	123	95.99	58	2753694	181032	32.7
ERR2137240	BPH2943	PRJEB27932	SAMEA104317540	Giulieri SG	2018	30103826	WHM-2018-05-021			blood	invasive	65	5		13	12	0	GCF_900620225.1	0	reads	2329644	351776244	151	126	96.65	56	2736915	207340	32.7
ERR2137244	BPH2947	PRJEB27932	SAMEA104317544	Giulieri SG	2018	30103826	WHM-2018-05-022	Yes	Yes	blood	invasive	0	239	Yes				GCF_900607265.1	0	reads	2732774	412648874	151	147	91.22	106	3025529	143057	32.66
ERR2137245	BPH2948	PRJEB27932	SAMEA104317545	Giulieri SG	2018	30103826	WHM-2018-05-022			blood	invasive	9	239	Yes	1	1	0	GCF_900607265.1	0	reads	2712016	409514416	151	146	91.34	101	3024420	143057	32.65
ERR2137256	BPH2959	PRJEB27932	SAMEA104317556	Giulieri SG	2018	30103826	WHM-2018-05-023	Yes	Yes	blood	invasive	0	5					GCF_009911835.1	0	reads	2407346	363509246	151	130	96.33	63	2740071	302689	32.77
ERR2137257	BPH2960	PRJEB27932	SAMEA104317557	Giulieri SG	2018	30103826	WHM-2018-05-023			blood	invasive	3	5		0	0	0	GCF_009911835.1	0	reads	2661682	401913982	151	144	96.45	62	2739894	312082	32.77
ERR2137258	BPH2961	PRJEB27932	SAMEA104317558	Giulieri SG	2018	30103826	WHM-2018-05-023			blood	invasive	4	5		0	0	0	GCF_009911835.1	0	reads	2497302	377092602	151	135	96.43	58	2739849	311857	32.77
ERR2137259	BPH2962	PRJEB27932	SAMEA104317559	Giulieri SG	2018	30103826	WHM-2018-05-024	Yes	Yes	blood	invasive	0	20					GCF_009912535.1	0	reads	3541532	534771332	151	191	97.03	115	2766184	268639	32.69
ERR2137260	BPH2963	PRJEB27932	SAMEA104317560	Giulieri SG	2018	30103826	WHM-2018-05-024			blood	invasive	3	20		5	5	5	GCF_009912535.1	0	reads	2196916	331734316	151	118	96.97	128	2767945	198285	32.69
ERR2137261	BPH2964	PRJEB27932	SAMEA104317561	Giulieri SG	2018	30103826	WHM-2018-05-024			blood	invasive	7	20		0	0	0	GCF_009912535.1	0	reads	3223472	486744272	151	174	97.11	113	2766234	198400	32.69
ERR2137262	BPH2965	PRJEB27932	SAMEA104317562	Giulieri SG	2018	30103826	WHM-2018-05-025	Yes	Yes	blood	invasive	0	8					GCF_001019415.2	0	reads	1991862	300771162	151	107	97.07	79	2804482	307281	32.67
ERR2137263	BPH2966	PRJEB27932	SAMEA104317563	Giulieri SG	2018	30103826	WHM-2018-05-025			blood	invasive	3	8		0	0	0	GCF_001019415.2	0	reads	2712458	409581158	151	146	97.12	90	2805010	285657	32.67
ERR2137270	BPH2973	PRJEB27932	SAMEA104317570	Giulieri SG	2018	30103826	WHM-2018-05-026	Yes	Yes	blood	invasive	0	39					GCF_003855575.1	0	reads	2872938	433813638	151	155	86.67	52	2778003	176070	32.81
ERR2137271	BPH2974	PRJEB27932	SAMEA104317571	Giulieri SG	2018	30103826	WHM-2018-05-026			blood	invasive	3	39		1	0	0	GCF_003855575.1	0	reads	2896296	437340696	151	156	86.8	62	2779451	175455	32.81
ERR2137272	BPH2975	PRJEB27932	SAMEA104317572	Giulieri SG	2018	30103826	WHM-2018-05-026			blood	invasive	5	39		1	0	0	GCF_003855575.1	0	reads	2803504	423329104	151	151	87.82	49	2777776	176070	32.81
ERR2137273	BPH2976	PRJEB27932	SAMEA104317573	Giulieri SG	2018	30103826	WHM-2018-05-027		Yes	blood	invasive	139	-	Yes	38	37	16	GCF_900607265.1	0	reads	2500952	377643752	151	135	91.59	116	3044392	142784	32.69
ERR2137274	BPH2977	PRJEB27932	SAMEA104317574	Giulieri SG	2018	30103826	WHM-2018-05-027			blood	invasive	3	-	Yes	37	37	16	GCF_900607265.1	0	reads	2524688	381227888	151	136	91.61	123	3044323	142784	32.69
ERR2137275	BPH2978	PRJEB27932	SAMEA104317575	Giulieri SG	2018	30103826	WHM-2018-05-027			blood	invasive	6	-	Yes	38	38	17	GCF_900607265.1	0	reads	2654660	400853660	151	143	91.65	114	3044908	133956	32.69
ERR2137276	BPH2979	PRJEB27932	SAMEA104317576	Giulieri SG	2018	30103826	WHM-2018-05-027			blood	invasive	8	-	Yes	39	38	17	GCF_900607265.1	0	reads	3238844	489065444	151	175	91.41	105	3043893	142784	32.69
ERR2137277	BPH2980	PRJEB27932	SAMEA104317577	Giulieri SG	2018	30103826	WHM-2018-05-027			blood	invasive	12	-	Yes	40	39	18	GCF_900607265.1	0	reads	2197212	331779012	151	118	91.42	113	3043265	133956	32.69
ERR2137278	BPH2981	PRJEB27932	SAMEA104317578	Giulieri SG	2018	30103826	WHM-2018-05-027			nose	colonising	5	-	Yes	35	34	13	GCF_900607265.1	0	reads	3153100	476118100	151	170	91.66	130	3046958	133956	32.69
ERR2137279	BPH2982	PRJEB27932	SAMEA104317579	Giulieri SG	2018	30103826	WHM-2018-05-027	Yes		nose	colonising	-139	-	Yes				GCF_900607265.1	0	reads	3148324	475396924	151	170	90.4	116	3063746	155477	32.67
ERR2137284	BPH2987	PRJEB27932	SAMEA104317584	Giulieri SG	2018	30103826	WHM-2018-05-028	Yes	Yes	blood	invasive	0	39					GCF_003855575.1	0	reads	2415086	364677986	151	130	95.35	53	2785853	224333	32.76
ERR2137285	BPH2988	PRJEB27932	SAMEA104317585	Giulieri SG	2018	30103826	WHM-2018-05-028			blood	invasive	5	39		0	0	0	GCF_003855575.1	0	reads	3032732	457942532	151	164	95.42	51	2785545	224735	32.76
ERR2137286	BPH2989	PRJEB27932	SAMEA104317586	Giulieri SG	2018	30103826	WHM-2018-05-029	Yes	Yes	blood	invasive	0	2176					GCF_009912915.1	0	reads	2570760	388184760	151	139	95.08	75	2819739	348945	32.69
ERR2137287	BPH2990	PRJEB27932	SAMEA104317587	Giulieri SG	2018	30103826	WHM-2018-05-029			blood	invasive	6	2176		0	0	0	GCF_009912915.1	0	reads	3072580	463959580	151	166	95.18	48	2817817	352748	32.69
ERR2137288	BPH2991	PRJEB27932	SAMEA104317588	Giulieri SG	2018	30103826	WHM-2018-05-029			blood	invasive	7	2176		0	0	0	GCF_009912915.1	0	reads	3001952	453294752	151	162	95.34	62	2819495	348945	32.69
ERR2137428	BPH3336	PRJEB27932	SAMEA104317728	Giulieri SG	2018	30103826	WHM-2018-05-030	Yes	Yes	blood	invasive	0	5	Yes				GCF_003031485.1	0	reads	2591596	372270586	143	133	88.74	99	2788849	145028	33.32
ERR2145246	BPH3733	PRJEB27932	SAMEA104325287	Giulieri SG	2018	30103826	WHM-2018-05-030			blood	invasive	14	5	Yes	29	12	2	GCF_003031485.1	0	reads	2282192	337437605	147	120	92.07	54	2747207	289537	32.69
ERR2137429	BPH3337	PRJEB27932	SAMEA104317729	Giulieri SG	2018	30103826	WHM-2018-05-031	Yes	Yes	blood	invasive	0	8					GCF_006364675.1	0	reads	2052196	298827954	145	107	90.44	133	2856922	113288	33.14
ERR2145247	BPH3734	PRJEB27932	SAMEA104325288	Giulieri SG	2018	30103826	WHM-2018-05-031			blood	invasive	7	8		29	17	3	GCF_006364675.1	0	reads	2203438	326074059	147	116	92.56	100	2806361	74083	32.68
ERR2137440	BPH3348	PRJEB27932	SAMEA104317740	Giulieri SG	2018	30103826	WHM-2018-05-032	Yes	Yes	blood	invasive	0	239	Yes				GCF_900607265.1	0	reads	1826266	268358329	146	96	88.18	747	3074886	30265	32.77
ERR2145248	BPH3735	PRJEB27932	SAMEA104325289	Giulieri SG	2018	30103826	WHM-2018-05-032			blood	invasive	15	239	Yes	19	6	1	GCF_900607265.1	0	reads	1914458	284225984	148	101	87.71	139	3005370	83964	32.68
ERR2137444	BPH3352	PRJEB27932	SAMEA104317744	Giulieri SG	2018	30103826	WHM-2018-05-033	Yes	Yes	blood	invasive	0	45	Yes				GCF_001594205.1	0	reads	2186724	317174899	145	113	90.66	164	2883397	103409	32.73
ERR2145249	BPH3736	PRJEB27932	SAMEA104325290	Giulieri SG	2018	30103826	WHM-2018-05-033			blood	invasive	5	45	Yes	28	24	1	GCF_001594205.1	0	reads	2672046	394157936	147	141	91.18	84	2873006	187885	32.67
ERR2137448	BPH3356	PRJEB27932	SAMEA104317748	Giulieri SG	2018	30103826	WHM-2018-05-034	Yes	Yes	blood	invasive	0	239	Yes				GCF_004136255.1	0	reads	2068184	300753730	145	107	89.62	183	3013625	82857	32.64
ERR2145250	BPH3737	PRJEB27932	SAMEA104325291	Giulieri SG	2018	30103826	WHM-2018-05-034			blood	invasive	9	239	Yes	14	12	0	GCF_004136255.1	0	reads	2152322	318251779	147	114	89.67	131	3001147	76434	32.65
ERR2137473	BPH3381	PRJEB27932	SAMEA104317773	Giulieri SG	2018	30103826	WHM-2018-05-035	Yes	Yes	blood	invasive	0	1795					GCF_009912375.1	0	reads	2750718	396668830	144	142	93.09	193	2778590	134136	32.9
ERR2145251	BPH3738	PRJEB27932	SAMEA104325292	Giulieri SG	2018	30103826	WHM-2018-05-035			blood	invasive	5	1795		16	5	2	GCF_009912375.1	0	reads	2077826	307764450	148	110	92.57	46	2755343	257446	32.8
ERR2137489	BPH3399	PRJEB27932	SAMEA104317789	Giulieri SG	2018	30103826	WHM-2018-05-037	Yes	Yes	blood	invasive	0	93	Yes				GCF_003609895.1	0	reads	1816002	267960638	147	96	93.02	67	2803455	261324	32.66
ERR2145253	BPH3740	PRJEB27932	SAMEA104325294	Giulieri SG	2018	30103826	WHM-2018-05-037			blood	invasive	13	93	Yes	13	9	0	GCF_003609895.1	0	reads	2358068	348307232	147	124	92.78	77	2809048	152285	32.66
ERR2137491	BPH3401	PRJEB27932	SAMEA104317791	Giulieri SG	2018	30103826	WHM-2018-05-038	Yes	Yes	blood	invasive	0	239	Yes				GCF_003264815.1	0	reads	1805228	266308773	147	95	90.12	116	3002085	155435	32.65
ERR2145254	BPH3741	PRJEB27932	SAMEA104325295	Giulieri SG	2018	30103826	WHM-2018-05-038			blood	invasive	20	239	Yes	11	8	6	GCF_003264815.1	0	reads	2270566	334158645	147	119	89.61	140	2996474	85132	32.67
ERR2145255	BPH3742	PRJEB27932	SAMEA104325296	Giulieri SG	2018	30103826	WHM-2018-05-038			blood	invasive	47	239	Yes	12	6	4	GCF_003264815.1	0	reads	2160802	319781853	147	114	89.97	432	3045537	37949	32.73
ERR2145256	BPH3743	PRJEB27932	SAMEA104325297	Giulieri SG	2018	30103826	WHM-2018-05-038			blood	invasive	78	239	Yes	14	11	9	GCF_003264815.1	0	reads	2469902	364124698	147	130	89.42	156	2995797	75802	32.68
ERR2145257	BPH3744	PRJEB27932	SAMEA104325298	Giulieri SG	2018	30103826	WHM-2018-05-038			blood	invasive	478	239	Yes	14	10	9	GCF_003264815.1	0	reads	2466956	363821890	147	130	89.63	170	2993520	51036	32.68
ERR2137506	BPH3417	PRJEB27932	SAMEA104317806	Giulieri SG	2018	30103826	WHM-2018-05-039			blood	invasive	23	239	Yes	9	3	1	GCF_003264815.1	0	reads	2094420	304138930	145	109	88.73	787	3071049	29730	32.82
ERR2145258	BPH3745	PRJEB27932	SAMEA104325299	Giulieri SG	2018	30103826	WHM-2018-05-039	Yes	Yes	blood	invasive	0	239	Yes				GCF_003264815.1	0	reads	2790938	416517470	149	149	91.35	111	3006249	155362	32.66
ERR2137512	BPH3423	PRJEB27932	SAMEA104317812	Giulieri SG	2018	30103826	WHM-2018-05-040			blood	invasive	8	20		15	7	1	GCF_003194145.1	0	reads	1807582	267662717	148	95	95.17	85	2758386	248300	32.66
ERR2145259	BPH3746	PRJEB27932	SAMEA104325300	Giulieri SG	2018	30103826	WHM-2018-05-040	Yes	Yes	blood	invasive	0	20					GCF_003194145.1	0	reads	2142232	317573343	148	113	95.05	452	2804719	40741	32.74
ERR2137516	BPH3427	PRJEB27932	SAMEA104317816	Giulieri SG	2018	30103826	WHM-2018-05-041	Yes	Yes	blood	invasive	0	22	Yes				GCF_001018835.2	0	reads	2999680	447908984	149	160	95.56	78	2762566	170173	32.69
ERR2145260	BPH3747	PRJEB27932	SAMEA104325301	Giulieri SG	2018	30103826	WHM-2018-05-041			blood	invasive	8	22	Yes	7	2	1	GCF_001018835.2	0	reads	2321928	340559860	146	122	93.94	107	2757232	103394	32.71
ERR2137522	BPH3433	PRJEB27932	SAMEA104317822	Giulieri SG	2018	30103826	WHM-2018-05-042	Yes	Yes	blood	invasive	0	239	Yes				GCF_003264815.1	0	reads	1981810	292138677	147	104	90.12	143	3003677	129677	32.65
ERR2145261	BPH3748	PRJEB27932	SAMEA104325302	Giulieri SG	2018	30103826	WHM-2018-05-042			blood	invasive	9	239	Yes	7	2	0	GCF_003264815.1	0	reads	2349426	347774983	148	124	89.37	130	2998280	91053	32.67
ERR2137526	BPH3437	PRJEB27932	SAMEA104317826	Giulieri SG	2018	30103826	WHM-2018-05-043	Yes	Yes	blood	invasive	0	22	Yes				GCF_900620235.1	0	reads	1918830	282455869	147	101	92.36	806	2880356	38845	32.88
ERR2145262	BPH3749	PRJEB27932	SAMEA104325303	Giulieri SG	2018	30103826	WHM-2018-05-043			blood	invasive	30	22	Yes	21	12	4	GCF_900620235.1	0	reads	2300796	339889553	147	121	91.54	104	2799674	94626	32.71
ERR2137622	BPH3535	PRJEB27932	SAMEA104317922	Giulieri SG	2018	30103826	WHM-2018-05-046	Yes	Yes	blood	invasive	0	239	Yes				GCF_900607265.1	0	reads	1649172	244834899	148	87	89.2	100	3017874	143057	32.61
ERR2145265	BPH3752	PRJEB27932	SAMEA104325306	Giulieri SG	2018	30103826	WHM-2018-05-046			blood	invasive	23	239	Yes	10	8	0	GCF_900607265.1	0	reads	2485372	366945449	147	131	87.63	124	3012929	76526	32.66
ERR2145187	BPH3674	PRJEB27932	SAMEA104325228	Giulieri SG	2018	30103826	WHM-2018-05-047	Yes	Yes	blood	invasive	0	239	Yes				GCF_005890015.1	0	reads	3113684	458290434	147	164	91.01	144	2903609	114081	32.72
ERR2145266	BPH3753	PRJEB27932	SAMEA104325307	Giulieri SG	2018	30103826	WHM-2018-05-047			blood	invasive	38	239	Yes	3	0	0	GCF_005890015.1	0	reads	2473726	365472336	147	131	90.39	435	2942811	38877	32.81
ERR2145203	BPH3690	PRJEB27932	SAMEA104325244	Giulieri SG	2018	30103826	WHM-2018-05-048	Yes	Yes	blood	invasive	0	22	Yes				GCF_900620235.1	0	reads	1670382	247230912	148	88	91.47	163	2786024	50726	32.75
ERR2145267	BPH3754	PRJEB27932	SAMEA104325308	Giulieri SG	2018	30103826	WHM-2018-05-048			blood	invasive	15	22	Yes	62	47	0	GCF_900620235.1	0	reads	2380982	349723351	146	125	91.25	125	2785270	86865	32.73
ERR2145207	BPH3694	PRJEB27932	SAMEA104325248	Giulieri SG	2018	30103826	WHM-2018-05-049	Yes	Yes	blood	invasive	0	239	Yes				GCF_900607295.1	0	reads	2541742	374843213	147	134	91.19	118	2878560	62506	32.74
ERR2145268	BPH3755	PRJEB27932	SAMEA104325309	Giulieri SG	2018	30103826	WHM-2018-05-049			blood	invasive	10	239	Yes	28	10	0	GCF_900607295.1	0	reads	2371106	349158375	147	125	90.6	129	2883116	67447	32.76
ERR2145219	BPH3706	PRJEB27932	SAMEA104325260	Giulieri SG	2018	30103826	WHM-2018-05-050	Yes	Yes	blood	invasive	0	239	Yes				GCF_005890015.1	0	reads	2457796	364858993	148	130	90.49	104	2907847	109451	32.73
ERR2145269	BPH3757	PRJEB27932	SAMEA104325310	Giulieri SG	2018	30103826	WHM-2018-05-050			blood	invasive	36	239	Yes	10	9	1	GCF_005890015.1	0	reads	2372530	346290951	145	124	90.12	235	2920425	55890	32.75
ERR2137038	BPH2726	PRJEB27932	SAMEA104317338	Giulieri SG	2018	30103826	WHM-2018-05-052		Yes	blood	invasive	0	239		27	26	16	GCF_004136255.1	0	reads	793526	186614647	235	66	93.56	87	2935488	143092	32.67
ERR2137039	BPH2727	PRJEB27932	SAMEA104317339	Giulieri SG	2018	30103826	WHM-2018-05-052	Yes		nose	colonising	0	239					GCF_004136255.1	0	reads	1192042	256297771	215	91	93.01	81	2934607	129665	32.67
ERR2137059	BPH2747	PRJEB27932	SAMEA104317359	Giulieri SG	2018	30103826	WHM-2018-05-053		Yes	blood	invasive	-8	239	Yes	46	44	2	GCF_003264815.1	0	reads	4215600	650015082	154	233	91.26	120	3008024	155449	32.67
ERR2137060	BPH2748	PRJEB27932	SAMEA104317360	Giulieri SG	2018	30103826	WHM-2018-05-053	Yes		nose	colonising	8	239	Yes				GCF_003264815.1	0	reads	767748	162339172	211	58	90.78	132	2996563	53996	32.71
ERR2137075	BPH2763	PRJEB27932	SAMEA104317375	Giulieri SG	2018	30103826	WHM-2018-05-054		Yes	blood	invasive	3	78	Yes	49	46	30	GCF_900096745.1	0	reads	1462840	297576433	203	106	93.99	59	2806092	420812	32.73
ERR2137076	BPH2764	PRJEB27932	SAMEA104317376	Giulieri SG	2018	30103826	WHM-2018-05-054	Yes		nose	colonising	-3	78	Yes				GCF_900096745.1	0	reads	921188	185466483	201	66	93.77	116	2801156	78993	32.74
ERR2137082	BPH2770	PRJEB27932	SAMEA104317382	Giulieri SG	2018	30103826	WHM-2018-05-055		Yes	blood	invasive	0	45	Yes	8	7	2	GCF_900323925.1	0	reads	1609874	277142466	172	99	89.14	90	2834457	92096	32.7
ERR2137083	BPH2771	PRJEB27932	SAMEA104317383	Giulieri SG	2018	30103826	WHM-2018-05-055	Yes		nose	colonising	0	45	Yes				GCF_900323925.1	0	reads	1504614	273553198	181	98	89.96	85	2834959	85423	32.7
ERR2137183	BPH2881	PRJEB27932	SAMEA104317483	Giulieri SG	2018	30103826	WHM-2018-05-056		Yes	blood	invasive	-127	1756	Yes	46	45	13	GCF_003203655.1	0	reads	1646768	291266029	176	104	90.2	39	2818977	244218	32.7
ERR2137184	BPH2882	PRJEB27932	SAMEA104317484	Giulieri SG	2018	30103826	WHM-2018-05-056	Yes		nose	colonising	127	1756	Yes				GCF_003203655.1	0	reads	831574	188118978	226	67	92.94	56	2817306	130271	32.71
ERR2137249	BPH2952	PRJEB27932	SAMEA104317549	Giulieri SG	2018	30103826	WHM-2018-05-057		Yes	blood	invasive	85	45	Yes	2	2	2	GCF_009912875.1	0	reads	3445126	520214026	151	186	94.86	57	2779529	692808	32.77
ERR2137250	BPH2953	PRJEB27932	SAMEA104317550	Giulieri SG	2018	30103826	WHM-2018-05-057	Yes		nose	colonising	-85	45	Yes				GCF_009912875.1	0	reads	2424508	366100708	151	131	95	40	2777505	704339	32.76
GCF_002983455.1	Case1_N0a	PRJNA414752	SAMN07811176	Benoit JB	2018	29723202	WHM-2018-06-001			nose	colonising	0	8		51	51	43	GCF_001018685.2	0	assembly						52	2878037	242260	32.69
GCF_002983415.1	Case1_N0c	PRJNA414752	SAMN07811178	Benoit JB	2018	29723202	WHM-2018-06-001	Yes		nose	colonising	0	8					GCF_001018685.2	0	assembly						72	2886549	796924	32.67
GCF_002983425.1	Case1_N0b	PRJNA414752	SAMN07811177	Benoit JB	2018	29723202	WHM-2018-06-001			nose	colonising	0	8		6	6	2	GCF_001018685.2	0	assembly						72	2888974	652680	32.67
GCF_002983395.1	Case1_N11	PRJNA414752	SAMN07811179	Benoit JB	2018	29723202	WHM-2018-06-001			nose	colonising	0	8		12	12	4	GCF_001018685.2	0	assembly						38	2860306	342506	32.68
GCF_002983375.1	Case1_N15a	PRJNA414752	SAMN07811180	Benoit JB	2018	29723202	WHM-2018-06-001			nose	colonising	0	8		51	51	43	GCF_001018685.2	0	assembly						39	2871248	228272	32.68
GCF_002983355.1	Case1_N15b	PRJNA414752	SAMN07811181	Benoit JB	2018	29723202	WHM-2018-06-001			nose	colonising	0	8		7	7	2	GCF_001018685.2	0	assembly						82	2893539	651911	32.66
GCF_002983335.1	Case1_N15c	PRJNA414752	SAMN07811182	Benoit JB	2018	29723202	WHM-2018-06-001			nose	colonising	0	8		2	2	0	GCF_001018685.2	0	assembly						102	2908982	798802	32.62
GCF_002983315.1	Case2_B0	PRJNA414752	SAMN07811183	Benoit JB	2018	29723202	WHM-2018-06-002		Yes	blood	invasive	-1076	8	Yes	51	51	29	GCF_001580515.1	0	assembly						28	2883437	194999	32.64
GCF_002983295.1	Case2_N13b	PRJNA414752	SAMN07811185	Benoit JB	2018	29723202	WHM-2018-06-002	Yes		nose	colonising	0	8	Yes				GCF_001580515.1	0	assembly						128	2955997	405555	32.56
GCF_002983275.1	Case2_N13a	PRJNA414752	SAMN07811184	Benoit JB	2018	29723202	WHM-2018-06-002			nose	colonising	0	8	Yes	24	24	2	GCF_001580515.1	0	assembly						27	2888389	326844	32.64
GCF_002983255.1	Case2_N13c	PRJNA414752	SAMN07811186	Benoit JB	2018	29723202	WHM-2018-06-002			nose	colonising	0	8	Yes	28	28	3	GCF_001580515.1	0	assembly						85	2927452	561604	32.61
GCF_002983235.1	Case3_B0	PRJNA414752	SAMN07811187	Benoit JB	2018	29723202	WHM-2018-06-003		Yes	blood	invasive	-824	5		20	20	11	GCF_009911835.1	0	assembly						21	2807738	222503	32.79
GCF_002983215.1	Case3_N108a	PRJNA414752	SAMN07811188	Benoit JB	2018	29723202	WHM-2018-06-003			nose	colonising	0	5		17	17	8	GCF_009911835.1	0	assembly						24	2807797	218871	32.79
GCF_002983165.1	Case3_N108c	PRJNA414752	SAMN07811190	Benoit JB	2018	29723202	WHM-2018-06-003			nose	colonising	0	5		8	8	4	GCF_009911835.1	0	assembly						32	2813655	220611	32.79
GCF_002983155.1	Case3_N2a	PRJNA414752	SAMN07811191	Benoit JB	2018	29723202	WHM-2018-06-003			nose	colonising	0	5		20	20	11	GCF_009911835.1	0	assembly						27	2807362	220446	32.79
GCF_002983175.1	Case3_N108b	PRJNA414752	SAMN07811189	Benoit JB	2018	29723202	WHM-2018-06-003	Yes		nose	colonising	0	5					GCF_009911835.1	0	assembly						45	2820299	220611	32.78
GCF_002983135.1	Case3_N2b	PRJNA414752	SAMN07811192	Benoit JB	2018	29723202	WHM-2018-06-003			nose	colonising	0	5		14	14	11	GCF_009911835.1	0	assembly						72	2840199	220611	32.76
GCF_002983115.1	Case3_N2c	PRJNA414752	SAMN07811193	Benoit JB	2018	29723202	WHM-2018-06-003			nose	colonising	0	5		10	10	7	GCF_009911835.1	0	assembly						26	2810253	220611	32.79
GCF_002983095.1	Case3_N49	PRJNA414752	SAMN07811194	Benoit JB	2018	29723202	WHM-2018-06-003			nose	colonising	0	5		14	14	6	GCF_009911835.1	0	assembly						35	2810151	184239	32.8
GCF_002983075.1	Case3_N89	PRJNA414752	SAMN07811195	Benoit JB	2018	29723202	WHM-2018-06-003			nose	colonising	0	5		16	16	7	GCF_009911835.1	0	assembly						24	2810565	222619	32.79
GCF_002982975.1	Case4_N208	PRJNA414752	SAMN07811200	Benoit JB	2018	29723202	WHM-2018-06-004			nose	colonising	0	5	Yes	10	10	10	GCF_003203675.1	0	assembly						93	2907388	55156	32.71
GCF_002982955.1	Case4_N229	PRJNA414752	SAMN07811201	Benoit JB	2018	29723202	WHM-2018-06-004			nose	colonising	0	5	Yes	5	5	5	GCF_003203675.1	0	assembly						37	2913617	370908	32.71
GCF_002982925.1	Case4_N326	PRJNA414752	SAMN07811202	Benoit JB	2018	29723202	WHM-2018-06-004	Yes		nose	colonising	0	5	Yes				GCF_003203675.1	0	assembly						32	2905539	271437	32.7
GCF_002982855.1	Case5_B0	PRJNA414752	SAMN07811206	Benoit JB	2018	29723202	WHM-2018-06-005		Yes	blood	invasive	-1106	5	Yes	51	51	23	GCF_003073655.1	0	assembly						47	2900642	168602	32.77
GCF_002982825.1	Case5_N0a	PRJNA414752	SAMN07811207	Benoit JB	2018	29723202	WHM-2018-06-005			nose	colonising	0	5	Yes	44	44	15	GCF_003073655.1	0	assembly						36	2898303	190307	32.77
GCF_002982815.1	Case5_N0c	PRJNA414752	SAMN07811209	Benoit JB	2018	29723202	WHM-2018-06-005			nose	colonising	0	5	Yes	10	10	4	GCF_003073655.1	0	assembly						60	2909738	168602	32.79
GCF_002982795.1	Case5_N0b	PRJNA414752	SAMN07811208	Benoit JB	2018	29723202	WHM-2018-06-005	Yes		nose	colonising	0	5	Yes				GCF_003073655.1	0	assembly						57	2908358	170404	32.78
GCF_002982775.1	Case6_N0a	PRJNA414752	SAMN07811211	Benoit JB	2018	29723202	WHM-2018-06-006			nose	colonising	0	5	Yes	2	2	2	GCF_009912995.1	0	assembly						27	2880535	221739	32.74
GCF_002982755.1	Case6_B0	PRJNA414752	SAMN07811210	Benoit JB	2018	29723202	WHM-2018-06-006		Yes	blood	invasive	-1001	5	Yes	1	1	1	GCF_009912995.1	0	assembly						25	2880497	282201	32.74
GCF_002982735.1	Case6_N0c	PRJNA414752	SAMN07811213	Benoit JB	2018	29723202	WHM-2018-06-006	Yes		nose	colonising	0	5	Yes				GCF_009912995.1	0	assembly						34	2884764	220701	32.74
GCF_002982715.1	Case6_N0b	PRJNA414752	SAMN07811212	Benoit JB	2018	29723202	WHM-2018-06-006			nose	colonising	0	5	Yes	1	1	1	GCF_009912995.1	0	assembly						35	2885393	220695	32.76
GCF_002982675.1	Case6_N25	PRJNA414752	SAMN07811217	Benoit JB	2018	29723202	WHM-2018-06-006			nose	colonising	0	5	Yes	7	7	7	GCF_009912995.1	0	assembly						30	2874751	193490	32.73
GCF_002982555.1	Case7_N1a	PRJNA414752	SAMN07811222	Benoit JB	2018	29723202	WHM-2018-06-007	Yes		nose	colonising	0	87					GCF_008693765.1	0	assembly						142	2752356	41790	32.79
GCF_002982535.1	Case7_N1b	PRJNA414752	SAMN07811223	Benoit JB	2018	29723202	WHM-2018-06-007			nose	colonising	0	87		111	111	11	GCF_008693765.1	0	assembly						45	2774740	151418	32.78
GCF_002982495.1	Case7_N1c	PRJNA414752	SAMN07811224	Benoit JB	2018	29723202	WHM-2018-06-007			nose	colonising	0	87		113	113	12	GCF_008693765.1	0	assembly						55	2780583	128762	32.8
GCF_002982515.1	Case8_B0	PRJNA414752	SAMN07811225	Benoit JB	2018	29723202	WHM-2018-06-008		Yes	blood	invasive	-535	5	Yes	5	5	5	GCF_003029665.1	0	assembly						34	2878987	420804	32.83
GCF_002982475.1	Case8_N0a	PRJNA414752	SAMN07811226	Benoit JB	2018	29723202	WHM-2018-06-008			nose	colonising	0	5	Yes	5	5	5	GCF_003029665.1	0	assembly						32	2878230	420724	32.83
GCF_002982455.1	Case8_N0b	PRJNA414752	SAMN07811227	Benoit JB	2018	29723202	WHM-2018-06-008	Yes		nose	colonising	0	5	Yes				GCF_003029665.1	0	assembly						40	2882951	420804	32.84
GCF_002982435.1	Case8_N0c	PRJNA414752	SAMN07811228	Benoit JB	2018	29723202	WHM-2018-06-008			nose	colonising	0	5	Yes	6	6	6	GCF_003029665.1	0	assembly						37	2881530	387972	32.83
GCF_002982415.1	Case8_N25a	PRJNA414752	SAMN07811229	Benoit JB	2018	29723202	WHM-2018-06-008			nose	colonising	0	5	Yes	11	11	11	GCF_003029665.1	0	assembly						40	2883962	420747	32.83
GCF_002982395.1	Case8_N25b	PRJNA414752	SAMN07811230	Benoit JB	2018	29723202	WHM-2018-06-008			nose	colonising	0	5	Yes	8	8	8	GCF_003029665.1	0	assembly						43	2884343	420804	32.84
GCF_002982375.1	Case8_N25c	PRJNA414752	SAMN07811231	Benoit JB	2018	29723202	WHM-2018-06-008			nose	colonising	0	5	Yes	8	8	8	GCF_003029665.1	0	assembly						39	2882015	388026	32.84
SRR6327761	HU-85a	PRJNA414566	SAMN07782090	Suligoy CM	2018	29456969	WHM-2018-07-001	Yes	Yes	bone	invasive	0	188					GCF_003573855.1	0	reads	4041790	1014489290	251	363	94.41	357	2641153	12556	32.98
GCF_002930565.1	HU-85a	PRJNA414566	SAMN07782090	Suligoy CM	2018	29456969	WHM-2018-07-001			bone	invasive	0	188		254	142	54	GCF_003573855.1	0	assembly						42	2732949	115212	32.7
SRR6327760	HU-85c	PRJNA414566	SAMN07793308	Suligoy CM	2018	29456969	WHM-2018-07-001			bone	invasive	390	188		198	77	10	GCF_003573855.1	0	reads	3645108	914922108	251	328	97.93	172	2732888	37093	32.75
ERR1904173	PSAE01-E1-18-c1	PRJEB20148	SAMEA103948742	Harkins CP	2018	28951239	WHM-2018-08-001			skin (atopic dermatitis)	colonising	0	188		8	8	6	GCF_003010875.1	0	reads	1399502	191376481	136	68	90.39	123	2779550	118190	32.69
ERR1904174	PSAE01-E1-18-c2	PRJEB20148	SAMEA103948743	Harkins CP	2018	28951239	WHM-2018-08-001			skin (atopic dermatitis)	colonising	0	188		8	8	6	GCF_003010875.1	0	reads	1618270	210919712	130	75	90.47	131	2777762	76694	32.7
ERR1904175	PSAE01-E1-18-c3	PRJEB20148	SAMEA103948744	Harkins CP	2018	28951239	WHM-2018-08-001			skin (atopic dermatitis)	colonising	0	188		3	3	3	GCF_003010875.1	0	reads	728710	108072527	148	38	91.11	195	2774857	43300	32.71
ERR1904176	PSAE01-E1-18-c4	PRJEB20148	SAMEA103948745	Harkins CP	2018	28951239	WHM-2018-08-001			skin (atopic dermatitis)	colonising	0	188		7	7	6	GCF_003010875.1	0	reads	1733812	255250704	147	91	91.06	94	2780284	208870	32.69
ERR1904177	PSAE01-E1-18-c5	PRJEB20148	SAMEA103948746	Harkins CP	2018	28951239	WHM-2018-08-001			skin (atopic dermatitis)	colonising	0	188		2	2	2	GCF_003010875.1	0	reads	861394	123160712	142	44	90.75	115	2773621	81603	32.71
ERR1904178	PSAE01-E1-ic1	PRJEB20148	SAMEA103948747	Harkins CP	2018	28951239	WHM-2018-08-001			skin (atopic dermatitis)	colonising	0	188		8	8	6	GCF_003010875.1	0	reads	1721920	244516498	142	87	90.6	71	2780069	394660	32.69
ERR1904179	PSAE01-E1-ic2	PRJEB20148	SAMEA103948748	Harkins CP	2018	28951239	WHM-2018-08-001			skin (atopic dermatitis)	colonising	0	188		8	8	6	GCF_003010875.1	0	reads	1337982	192834033	144	69	90.88	88	2778950	128491	32.7
ERR1904180	PSAE01-E1-ic3	PRJEB20148	SAMEA103948749	Harkins CP	2018	28951239	WHM-2018-08-001	Yes		skin (atopic dermatitis)	colonising	0	188					GCF_003010875.1	0	reads	1868344	270046068	144	96	90.38	68	2779240	317554	32.7
ERR1904181	PSAE01-E1-ic4	PRJEB20148	SAMEA103948750	Harkins CP	2018	28951239	WHM-2018-08-001			skin (atopic dermatitis)	colonising	0	188		5	5	3	GCF_003010875.1	0	reads	1904702	283654649	148	101	90.83	90	2779674	246092	32.7
ERR1904182	PSAE01-E1-ic5	PRJEB20148	SAMEA103948751	Harkins CP	2018	28951239	WHM-2018-08-001			skin (atopic dermatitis)	colonising	0	188		11	11	10	GCF_003010875.1	0	reads	2422354	347197205	143	124	90.91	70	2780500	246086	32.7
ERR1904183	PSAE01-E2-ic1	PRJEB20148	SAMEA103948752	Harkins CP	2018	28951239	WHM-2018-08-001			skin (atopic dermatitis)	colonising	0	188		7	7	7	GCF_003010875.1	0	reads	1760644	259181839	147	92	91.18	97	2778245	135024	32.69
ERR1904184	PSAE01-E2-ic2	PRJEB20148	SAMEA103948753	Harkins CP	2018	28951239	WHM-2018-08-001			skin (atopic dermatitis)	colonising	0	188		19	19	17	GCF_003010875.1	0	reads	1183552	171989055	145	61	91.63	100	2758110	222238	32.73
ERR1904185	PSAE01-E2-ic3	PRJEB20148	SAMEA103948754	Harkins CP	2018	28951239	WHM-2018-08-001			skin (atopic dermatitis)	colonising	0	188		8	8	6	GCF_003010875.1	0	reads	1237846	177345156	143	63	90.62	83	2779841	159869	32.7
ERR1904186	PSAE01-E2-ic4	PRJEB20148	SAMEA103948755	Harkins CP	2018	28951239	WHM-2018-08-001			skin (atopic dermatitis)	colonising	0	188		2	2	2	GCF_003010875.1	0	reads	1065126	154616056	145	55	90.71	134	2780158	103405	32.69
ERR1904187	PSAE01-E2-ic5	PRJEB20148	SAMEA103948756	Harkins CP	2018	28951239	WHM-2018-08-001			skin (atopic dermatitis)	colonising	0	188		6	6	6	GCF_003010875.1	0	reads	912654	133865103	146	48	90.95	157	2776788	56613	32.7
ERR1904188	PSAE01-N-c1	PRJEB20148	SAMEA103948759	Harkins CP	2018	28951239	WHM-2018-08-001			nose	colonising	0	188		6	6	4	GCF_003010875.1	0	reads	1503096	215791306	143	77	91.09	80	2779409	317681	32.7
ERR1904189	PSAE01-N-c2	PRJEB20148	SAMEA103948760	Harkins CP	2018	28951239	WHM-2018-08-001			nose	colonising	0	188		20	20	18	GCF_003010875.1	0	reads	1153392	167575864	145	60	92.11	130	2759388	91677	32.73
ERR1904190	PSAE01-N18-c1	PRJEB20148	SAMEA103948757	Harkins CP	2018	28951239	WHM-2018-08-001			nose	colonising	0	188		5	5	3	GCF_003010875.1	0	reads	1802792	260069920	144	93	90.73	67	2758055	283417	32.73
ERR1904191	PSAE01-N18-c3	PRJEB20148	SAMEA103948758	Harkins CP	2018	28951239	WHM-2018-08-001			nose	colonising	0	188		23	23	21	GCF_003010875.1	0	reads	1460814	211491913	144	75	91.66	94	2760151	158067	32.73
ERR1904192	PSAE01-U1-ic1	PRJEB20148	SAMEA103948761	Harkins CP	2018	28951239	WHM-2018-08-001			skin	colonising	0	188		9	9	7	GCF_003010875.1	0	reads	1575814	222474620	141	79	90.58	76	2778241	199942	32.7
ERR1904193	PSAE01-U1-ic2	PRJEB20148	SAMEA103948762	Harkins CP	2018	28951239	WHM-2018-08-001			skin	colonising	0	188		7	7	7	GCF_003010875.1	0	reads	1745120	235366220	134	84	89.67	111	2779597	152665	32.69
ERR1904194	PSAE01-U1-ic3	PRJEB20148	SAMEA103948763	Harkins CP	2018	28951239	WHM-2018-08-001			skin	colonising	0	188		8	8	6	GCF_003010875.1	0	reads	2093852	300953403	143	107	90.68	79	2778717	189139	32.7
ERR1904195	PSAE01-U1-ic4	PRJEB20148	SAMEA103948764	Harkins CP	2018	28951239	WHM-2018-08-001			skin	colonising	0	188		9	9	7	GCF_003010875.1	0	reads	2187680	306375262	140	109	90.55	128	2781066	208876	32.69
ERR1904196	PSAE01-U1-ic5	PRJEB20148	SAMEA103948765	Harkins CP	2018	28951239	WHM-2018-08-001			skin	colonising	0	188		8	8	6	GCF_003010875.1	0	reads	1746962	252808529	144	90	90.69	74	2780347	204499	32.7
ERR2094464	PSAE01-N18-c4	PRJEB20148	SAMEA104210746	Harkins CP	2018	28951239	WHM-2018-08-001			nose	colonising	0	188		7	7	7	GCF_003010875.1	0	reads	1067458	247014386	231	88	95.34	30	2779060	878460	32.7
ERR1904223	PSAE02-E1-c1-24	PRJEB20148	SAMEA103948766	Harkins CP	2018	28951239	WHM-2018-08-002			skin (atopic dermatitis)	colonising	0	59		19	14	0	GCF_004772055.1	0	reads	2078916	215138135	103	77	82.75	230	2701487	43776	32.81
ERR1904224	PSAE02-E1-c2-24	PRJEB20148	SAMEA103948767	Harkins CP	2018	28951239	WHM-2018-08-002			skin (atopic dermatitis)	colonising	0	59		21	16	0	GCF_004772055.1	0	reads	1861300	191904249	103	68	84	259	2707698	33766	32.81
ERR1904225	PSAE02-E1-c3-24	PRJEB20148	SAMEA103948768	Harkins CP	2018	28951239	WHM-2018-08-002			skin (atopic dermatitis)	colonising	0	59		17	13	1	GCF_004772055.1	0	reads	1825502	184842527	101	66	82.85	328	2705244	23767	32.81
ERR1904226	PSAE02-E1-c4-24	PRJEB20148	SAMEA103948769	Harkins CP	2018	28951239	WHM-2018-08-002			skin (atopic dermatitis)	colonising	0	59		14	9	0	GCF_004772055.1	0	reads	2052730	206682470	100	74	85.14	378	2700222	18177	32.82
ERR1904228	PSAE02-E1-ic10-BP	PRJEB20148	SAMEA103948770	Harkins CP	2018	28951239	WHM-2018-08-002			skin (atopic dermatitis)	colonising	0	59		17	12	0	GCF_004772055.1	0	reads	1877326	199815438	106	71	85.47	302	2704399	25647	32.81
ERR1904230	PSAE02-E1-ic3-BP	PRJEB20148	SAMEA103948773	Harkins CP	2018	28951239	WHM-2018-08-002			skin (atopic dermatitis)	colonising	0	59		17	12	0	GCF_004772055.1	0	reads	1973406	199048473	100	71	84.91	268	2706951	33253	32.81
ERR1904232	PSAE02-E1-ic5-BP	PRJEB20148	SAMEA103948775	Harkins CP	2018	28951239	WHM-2018-08-002			skin (atopic dermatitis)	colonising	0	59		16	11	0	GCF_004772055.1	0	reads	1557426	160712826	103	57	82.21	348	2705133	20381	32.81
ERR1904234	PSAE02-E1-ic7-BP	PRJEB20148	SAMEA103948777	Harkins CP	2018	28951239	WHM-2018-08-002			skin (atopic dermatitis)	colonising	0	59		10	6	0	GCF_004772055.1	0	reads	1661086	178694587	107	64	84.11	400	2696684	15499	32.84
ERR1904235	PSAE02-E1-ic8-BP	PRJEB20148	SAMEA103948778	Harkins CP	2018	28951239	WHM-2018-08-002	Yes		skin (atopic dermatitis)	colonising	0	59					GCF_004772055.1	0	reads	1944724	205044422	105	73	84.16	462	2685858	13396	32.86
ERR1904236	PSAE02-E1-ic9-BP	PRJEB20148	SAMEA103948779	Harkins CP	2018	28951239	WHM-2018-08-002			skin (atopic dermatitis)	colonising	0	59		21	16	0	GCF_004772055.1	0	reads	2031966	210875297	103	75	83.77	305	2707039	23642	32.81
ERR1904067	PSAE003-E1-Col1	PRJEB20148	SAMEA103948780	Harkins CP	2018	28951239	WHM-2018-08-003			skin (atopic dermatitis)	colonising	0	1		11	10	1	GCF_002209325.1	0	reads	1066900	240952920	225	86	95.87	38	2780374	315036	32.71
ERR1904068	PSAE003-E1-Col2	PRJEB20148	SAMEA103948781	Harkins CP	2018	28951239	WHM-2018-08-003			skin (atopic dermatitis)	colonising	0	1		15	14	3	GCF_002209325.1	0	reads	1298398	292937285	225	105	95.53	59	2783515	315036	32.72
ERR1904069	PSAE003-E1-Col3	PRJEB20148	SAMEA103948782	Harkins CP	2018	28951239	WHM-2018-08-003			skin (atopic dermatitis)	colonising	0	1		27	26	4	GCF_002209325.1	0	reads	953012	219578863	230	78	96.51	29	2780857	686683	32.71
ERR1904070	PSAE003-E1-Col4	PRJEB20148	SAMEA103948783	Harkins CP	2018	28951239	WHM-2018-08-003	Yes		skin (atopic dermatitis)	colonising	0	1					GCF_002209325.1	0	reads	879794	202536962	230	72	96.09	57	2784259	315864	32.72
ERR1904071	PSAE003-E1-Col5	PRJEB20148	SAMEA103948784	Harkins CP	2018	28951239	WHM-2018-08-003			skin (atopic dermatitis)	colonising	0	1		16	15	1	GCF_002209325.1	0	reads	1072832	238976809	222	85	95.7	146	2800455	168532	32.77
ERR1904072	PSAE003-E1-Col6	PRJEB20148	SAMEA103948785	Harkins CP	2018	28951239	WHM-2018-08-003			skin (atopic dermatitis)	colonising	0	1		19	18	4	GCF_002209325.1	0	reads	1096460	253319786	231	90	96.17	31	2780360	686172	32.71
ERR1904073	PSAE003-E2-Col1	PRJEB20148	SAMEA103948787	Harkins CP	2018	28951239	WHM-2018-08-003			skin (atopic dermatitis)	colonising	0	1		25	24	5	GCF_002209325.1	0	reads	882108	203954615	231	73	96.49	30	2780438	424600	32.71
ERR1904074	PSAE003-E2-Col10	PRJEB20148	SAMEA103948786	Harkins CP	2018	28951239	WHM-2018-08-003			skin (atopic dermatitis)	colonising	0	1		14	13	2	GCF_002209325.1	0	reads	855174	197499389	230	70	96.25	38	2780402	493566	32.71
ERR1904075	PSAE003-E2-Col2	PRJEB20148	SAMEA103948788	Harkins CP	2018	28951239	WHM-2018-08-003			skin (atopic dermatitis)	colonising	0	1		21	20	1	GCF_002209325.1	0	reads	1069968	247982999	231	88	96.43	34	2781063	570395	32.71
ERR1904076	PSAE003-E2-Col3	PRJEB20148	SAMEA103948789	Harkins CP	2018	28951239	WHM-2018-08-003			skin (atopic dermatitis)	colonising	0	1		27	26	5	GCF_002209325.1	0	reads	1907398	439215206	230	157	96.28	52	2784012	686503	32.72
ERR1904077	PSAE003-E2-Col4	PRJEB20148	SAMEA103948790	Harkins CP	2018	28951239	WHM-2018-08-003			skin (atopic dermatitis)	colonising	0	1		23	22	3	GCF_002209325.1	0	reads	994742	229155546	230	82	96.22	38	2781416	569846	32.71
ERR1904078	PSAE003-E2-Col5	PRJEB20148	SAMEA103948791	Harkins CP	2018	28951239	WHM-2018-08-003			skin (atopic dermatitis)	colonising	0	1		15	14	3	GCF_002209325.1	0	reads	990738	229360856	231	82	96.45	26	2780008	687070	32.71
ERR1904079	PSAE003-E2-Col6	PRJEB20148	SAMEA103948792	Harkins CP	2018	28951239	WHM-2018-08-003			skin (atopic dermatitis)	colonising	0	1		17	16	5	GCF_002209325.1	0	reads	984230	228158606	231	81	96.34	144	2800475	267763	32.78
ERR1904080	PSAE003-E2-Col7	PRJEB20148	SAMEA103948793	Harkins CP	2018	28951239	WHM-2018-08-003			skin (atopic dermatitis)	colonising	0	1		15	15	4	GCF_002209325.1	0	reads	996610	228238476	229	81	95.89	162	2803709	168947	32.79
ERR1904081	PSAE003-E2-Col9	PRJEB20148	SAMEA103948794	Harkins CP	2018	28951239	WHM-2018-08-003			skin (atopic dermatitis)	colonising	0	1		20	19	3	GCF_002209325.1	0	reads	989936	221600062	223	79	95.25	1103	2943944	30675	33.42
ERR1904082	PSAE003-U2-18HR-Col1	PRJEB20148	SAMEA103948795	Harkins CP	2018	28951239	WHM-2018-08-003			skin	colonising	0	1		14	13	3	GCF_002209325.1	0	reads	1055746	242617405	229	86	96.16	192	2808568	188167	32.82
ERR1904083	PSAE003-U2-18HR-Col2	PRJEB20148	SAMEA103948796	Harkins CP	2018	28951239	WHM-2018-08-003			skin	colonising	0	1		11	10	2	GCF_002209325.1	0	reads	999834	229399146	229	82	95.9	149	2800827	147946	32.78
ERR1904084	PSAE003-U2-18HR-Col3	PRJEB20148	SAMEA103948797	Harkins CP	2018	28951239	WHM-2018-08-003			skin	colonising	0	1		12	11	3	GCF_002209325.1	0	reads	974496	222451127	228	79	95.81	101	2788803	133662	32.74
ERR1904085	PSAE003-U2-18HR-Col4	PRJEB20148	SAMEA103948798	Harkins CP	2018	28951239	WHM-2018-08-003			skin	colonising	0	1		15	14	3	GCF_002209325.1	0	reads	976154	221143811	226	79	96.09	37	2780788	424600	32.71
ERR1904086	PSAE003-U2-18HR-Col5	PRJEB20148	SAMEA103948799	Harkins CP	2018	28951239	WHM-2018-08-003			skin	colonising	0	1		24	23	3	GCF_002209325.1	0	reads	1656948	371942720	224	133	95.82	41	2782559	687104	32.71
ERR1904087	PSAE003-U2-IC1	PRJEB20148	SAMEA103948800	Harkins CP	2018	28951239	WHM-2018-08-003			skin	colonising	0	1		14	13	3	GCF_002209325.1	0	reads	960448	216875824	225	77	95.8	105	2790674	210865	32.74
ERR2094465	PSAE003-E2-Col8	PRJEB20148	SAMEA104210747	Harkins CP	2018	28951239	WHM-2018-08-003			skin (atopic dermatitis)	colonising	0	1		26	25	4	GCF_002209325.1	0	reads	1341678	311120816	231	111	96.54	29	2780280	687070	32.71
ERR1904088	PSAE004-E1-C1	PRJEB20148	SAMEA103948801	Harkins CP	2018	28951239	WHM-2018-08-004			skin (atopic dermatitis)	colonising	0	1		12	12	1	GCF_003952625.1	0	reads	868122	197678354	227	70	93.95	52	2840301	176618	32.7
ERR1904089	PSAE004-E1-C2	PRJEB20148	SAMEA103948802	Harkins CP	2018	28951239	WHM-2018-08-004			skin (atopic dermatitis)	colonising	0	1		17	17	2	GCF_003952625.1	0	reads	978124	217305156	222	77	93.76	30	2838195	882453	32.7
ERR1904090	PSAE004-E1-C3	PRJEB20148	SAMEA103948803	Harkins CP	2018	28951239	WHM-2018-08-004			skin (atopic dermatitis)	colonising	0	1		17	17	1	GCF_003952625.1	0	reads	952602	219488417	230	78	94.05	36	2839559	564816	32.7
ERR1904091	PSAE004-E1-C4	PRJEB20148	SAMEA103948804	Harkins CP	2018	28951239	WHM-2018-08-004			skin (atopic dermatitis)	colonising	0	1		20	20	6	GCF_003952625.1	0	reads	1151846	264640833	229	94	94.2	759	2949993	39673	33.16
ERR1904092	PSAE004-E2-C2	PRJEB20148	SAMEA103948805	Harkins CP	2018	28951239	WHM-2018-08-004			skin (atopic dermatitis)	colonising	0	1		36	36	16	GCF_003952625.1	0	reads	1403610	310278562	221	111	93.72	1007	2988005	52257	33.36
ERR1904093	PSAE004-E2-C3	PRJEB20148	SAMEA103948806	Harkins CP	2018	28951239	WHM-2018-08-004			skin (atopic dermatitis)	colonising	0	1		18	18	1	GCF_003952625.1	0	reads	1166924	266173835	228	95	94.03	807	2958016	38736	33.22
ERR1904094	PSAE004-E2-C4	PRJEB20148	SAMEA103948807	Harkins CP	2018	28951239	WHM-2018-08-004			skin (atopic dermatitis)	colonising	0	1		34	34	14	GCF_003952625.1	0	reads	1986826	448383737	225	160	93.51	46	2841645	314976	32.71
ERR1904095	PSAE004-E2-C5	PRJEB20148	SAMEA103948808	Harkins CP	2018	28951239	WHM-2018-08-004			skin (atopic dermatitis)	colonising	0	1		35	35	19	GCF_003952625.1	0	reads	776868	169844026	218	60	93.86	57	2841616	308090	32.71
ERR1904096	PSAE004-E3-C1	PRJEB20148	SAMEA103948809	Harkins CP	2018	28951239	WHM-2018-08-004			skin (atopic dermatitis)	colonising	0	1		23	23	3	GCF_003952625.1	0	reads	1489596	341075265	228	122	94.35	38	2840196	485669	32.71
ERR1904097	PSAE004-E3-C2	PRJEB20148	SAMEA103948810	Harkins CP	2018	28951239	WHM-2018-08-004	Yes		skin (atopic dermatitis)	colonising	0	1					GCF_003952625.1	0	reads	1191538	268933930	225	96	94.25	212	2870171	116195	32.83
ERR1904098	PSAE004-E3-C3	PRJEB20148	SAMEA103948811	Harkins CP	2018	28951239	WHM-2018-08-004			skin (atopic dermatitis)	colonising	0	1		21	21	1	GCF_003952625.1	0	reads	1756678	403490940	229	144	94.32	32	2839641	315987	32.7
ERR1904099	PSAE004-E3-C5	PRJEB20148	SAMEA103948812	Harkins CP	2018	28951239	WHM-2018-08-004			skin (atopic dermatitis)	colonising	0	1		31	31	6	GCF_003952625.1	0	reads	1731952	401158503	231	143	94.55	37	2839937	1437860	32.7
ERR1904100	PSAE004-E4-C1	PRJEB20148	SAMEA103948813	Harkins CP	2018	28951239	WHM-2018-08-004			skin (atopic dermatitis)	colonising	0	1		30	30	5	GCF_003952625.1	0	reads	1607724	365829562	227	131	94.31	36	2839592	564815	32.7
ERR1904101	PSAE004-E4-C2	PRJEB20148	SAMEA103948814	Harkins CP	2018	28951239	WHM-2018-08-004			skin (atopic dermatitis)	colonising	0	1		33	33	15	GCF_003952625.1	0	reads	1190126	274440666	230	98	94.38	33	2838715	385239	32.7
ERR1904102	PSAE004-E4-C3	PRJEB20148	SAMEA103948815	Harkins CP	2018	28951239	WHM-2018-08-004			skin (atopic dermatitis)	colonising	0	1		22	22	2	GCF_003952625.1	0	reads	1506700	344520837	228	123	94.31	30	2838443	564816	32.7
ERR1904103	PSAE004-NC1	PRJEB20148	SAMEA103948816	Harkins CP	2018	28951239	WHM-2018-08-004			nose	colonising	0	1		23	23	3	GCF_003952625.1	0	reads	1303166	297129491	228	106	94.41	151	2860352	138138	32.79
ERR1904104	PSAE004-NC2	PRJEB20148	SAMEA103948817	Harkins CP	2018	28951239	WHM-2018-08-004			nose	colonising	0	1		38	38	14	GCF_003952625.1	0	reads	1566602	346494588	221	124	94.22	34	2839162	879817	32.7
ERR1904105	PSAE004-NC3	PRJEB20148	SAMEA103948818	Harkins CP	2018	28951239	WHM-2018-08-004			nose	colonising	0	1		23	23	6	GCF_003952625.1	0	reads	1056854	240384725	227	86	93.89	150	2856141	121054	32.79
ERR1904106	PSAE004-NC4	PRJEB20148	SAMEA103948819	Harkins CP	2018	28951239	WHM-2018-08-004			nose	colonising	0	1		25	25	15	GCF_003952625.1	0	reads	984160	223970507	227	80	94.1	658	2931662	48304	33.14
ERR1904107	PSAE004-NC5	PRJEB20148	SAMEA103948820	Harkins CP	2018	28951239	WHM-2018-08-004			nose	colonising	0	1		12	12	5	GCF_003952625.1	0	reads	752712	169608265	225	60	93.19	113	2837940	49697	32.72
ERR1904108	PSAE004-U1-C1	PRJEB20148	SAMEA103948821	Harkins CP	2018	28951239	WHM-2018-08-004			skin	colonising	0	1		17	17	2	GCF_003952625.1	0	reads	1133624	255180857	225	91	93.75	1353	3040103	37758	33.69
ERR1904109	PSAE004-U1-C2	PRJEB20148	SAMEA103948822	Harkins CP	2018	28951239	WHM-2018-08-004			skin	colonising	0	1		21	21	3	GCF_003952625.1	0	reads	855858	196415178	229	70	94.27	54	2839709	423241	32.71
ERR1904110	PSAE004-U1-C3	PRJEB20148	SAMEA103948823	Harkins CP	2018	28951239	WHM-2018-08-004			skin	colonising	0	1		23	23	2	GCF_003952625.1	0	reads	1238636	279188230	225	100	94.15	68	2845543	247414	32.71
ERR1904111	PSAE004-U1-C4	PRJEB20148	SAMEA103948824	Harkins CP	2018	28951239	WHM-2018-08-004			skin	colonising	0	1		25	25	9	GCF_003952625.1	0	reads	1154870	259258499	224	92	93.71	46	2840505	315543	32.7
ERR1904112	PSAE004-U2-C1	PRJEB20148	SAMEA103948825	Harkins CP	2018	28951239	WHM-2018-08-004			skin	colonising	0	1		33	33	10	GCF_003952625.1	0	reads	2128594	491645330	230	176	94.57	34	2839648	558011	32.7
ERR1904113	PSAE004-U2-C2	PRJEB20148	SAMEA103948826	Harkins CP	2018	28951239	WHM-2018-08-004			skin	colonising	0	1		24	24	10	GCF_003952625.1	0	reads	757796	173757131	229	62	94.3	44	2837473	315159	32.71
ERR1904114	PSAE004-U2-C3	PRJEB20148	SAMEA103948827	Harkins CP	2018	28951239	WHM-2018-08-004			skin	colonising	0	1		22	22	10	GCF_003952625.1	0	reads	1265596	288520513	227	103	94.01	1009	2986115	29260	33.31
ERR1904115	PSAE004-U2-C5	PRJEB20148	SAMEA103948828	Harkins CP	2018	28951239	WHM-2018-08-004			skin	colonising	0	1		20	20	15	GCF_003952625.1	0	reads	898600	206655689	229	74	94.3	49	2838019	259208	32.71
ERR1904116	PSAE005-E1-C1	PRJEB20148	SAMEA103948829	Harkins CP	2018	28951239	WHM-2018-08-005			skin (atopic dermatitis)	colonising	0	30		36	36	25	GCF_009912715.1	0	reads	748752	171144327	228	61	94.61	71	2811320	115077	32.74
ERR1904117	PSAE005-E1C2	PRJEB20148	SAMEA103948830	Harkins CP	2018	28951239	WHM-2018-08-005			skin (atopic dermatitis)	colonising	0	30		54	53	25	GCF_009912715.1	0	reads	1432540	323490056	225	115	94.47	60	2811584	209240	32.74
ERR1904118	PSAE005-E1C3	PRJEB20148	SAMEA103948831	Harkins CP	2018	28951239	WHM-2018-08-005			skin (atopic dermatitis)	colonising	0	30		47	46	27	GCF_009912715.1	0	reads	1175784	269507479	229	96	94.15	970	2946882	41404	33.24
ERR1904119	PSAE005-E1C4	PRJEB20148	SAMEA103948832	Harkins CP	2018	28951239	WHM-2018-08-005			skin (atopic dermatitis)	colonising	0	30		38	38	24	GCF_009912715.1	0	reads	1276752	277689405	217	99	93.84	65	2811054	145709	32.74
ERR1904120	PSAE005-E1C5	PRJEB20148	SAMEA103948833	Harkins CP	2018	28951239	WHM-2018-08-005			skin (atopic dermatitis)	colonising	0	30		29	29	24	GCF_009912715.1	0	reads	1292628	283106424	219	101	92.5	110	2787243	53912	32.79
ERR1904121	PSAE005-E2-C4	PRJEB20148	SAMEA103948837	Harkins CP	2018	28951239	WHM-2018-08-005	Yes		skin (atopic dermatitis)	colonising	0	30					GCF_009912715.1	0	reads	924422	206824314	223	74	94.61	71	2785497	100302	32.76
ERR1904122	PSAE005-E2C1	PRJEB20148	SAMEA103948834	Harkins CP	2018	28951239	WHM-2018-08-005			skin (atopic dermatitis)	colonising	0	30		8	8	0	GCF_009912715.1	0	reads	1321244	266378634	201	95	92.47	163	2792776	66322	32.8
ERR1904123	PSAE005-E2C2	PRJEB20148	SAMEA103948835	Harkins CP	2018	28951239	WHM-2018-08-005			skin (atopic dermatitis)	colonising	0	30		21	20	0	GCF_009912715.1	0	reads	1315484	285427373	216	102	93.3	66	2781470	90943	32.77
ERR1904124	PSAE005-E2C3	PRJEB20148	SAMEA103948836	Harkins CP	2018	28951239	WHM-2018-08-005			skin (atopic dermatitis)	colonising	0	30		14	13	0	GCF_009912715.1	0	reads	1261696	269912892	213	96	93.77	110	2788944	92844	32.78
ERR1904125	PSAE005-E2C5	PRJEB20148	SAMEA103948838	Harkins CP	2018	28951239	WHM-2018-08-005			skin (atopic dermatitis)	colonising	0	30		6	6	0	GCF_009912715.1	0	reads	1071818	227480247	212	81	92.76	95	2772804	53987	32.78
ERR1904126	PSAE006-E3-18HR-col2	PRJEB20148	SAMEA103948839	Harkins CP	2018	28951239	WHM-2018-08-006			skin (atopic dermatitis)	colonising	0	5		17	14	1	GCF_009911855.1	0	reads	1033756	238785356	230	85	95.35	204	2810687	168274	32.83
ERR1904127	PSAE006-E3-18HR-col4	PRJEB20148	SAMEA103948840	Harkins CP	2018	28951239	WHM-2018-08-006			skin (atopic dermatitis)	colonising	0	5		18	15	1	GCF_009911855.1	0	reads	1653080	379043842	229	135	95.27	43	2782458	325837	32.71
ERR1904128	PSAE006-E3-18HR-col6	PRJEB20148	SAMEA103948841	Harkins CP	2018	28951239	WHM-2018-08-006			skin (atopic dermatitis)	colonising	0	5		12	10	1	GCF_009911855.1	0	reads	1199964	275414228	229	98	95.23	40	2781908	715111	32.71
ERR1904129	PSAE006-E3-ic1	PRJEB20148	SAMEA103948842	Harkins CP	2018	28951239	WHM-2018-08-006			skin (atopic dermatitis)	colonising	0	5		19	16	1	GCF_009911855.1	0	reads	1537084	354493452	230	127	95.27	39	2781850	432821	32.7
ERR1904130	PSAE006-E3-ic2	PRJEB20148	SAMEA103948843	Harkins CP	2018	28951239	WHM-2018-08-006			skin (atopic dermatitis)	colonising	0	5		24	21	1	GCF_009911855.1	0	reads	897284	206249943	229	73	95.65	35	2781473	325837	32.7
ERR1904131	PSAE006-E4-18HR-col2	PRJEB20148	SAMEA103948844	Harkins CP	2018	28951239	WHM-2018-08-006			skin (atopic dermatitis)	colonising	0	5		12	9	1	GCF_009911855.1	0	reads	1429770	326840879	228	117	95.07	149	2801614	165896	32.79
ERR1904132	PSAE006-E4-ic2	PRJEB20148	SAMEA103948845	Harkins CP	2018	28951239	WHM-2018-08-006			skin (atopic dermatitis)	colonising	0	5		17	14	1	GCF_009911855.1	0	reads	1398892	317132870	226	113	95.04	42	2782186	302689	32.71
ERR1904133	PSAE006-E4-ic3	PRJEB20148	SAMEA103948846	Harkins CP	2018	28951239	WHM-2018-08-006			skin (atopic dermatitis)	colonising	0	5		19	16	3	GCF_009911855.1	0	reads	1599496	358046804	223	128	95.03	43	2782445	325837	32.71
ERR1904134	PSAE006-E4-ic4	PRJEB20148	SAMEA103948847	Harkins CP	2018	28951239	WHM-2018-08-006			skin (atopic dermatitis)	colonising	0	5		19	16	2	GCF_009911855.1	0	reads	2087728	474350278	227	170	95.08	44	2782399	325837	32.71
ERR1904135	PSAE006-U2-ic1	PRJEB20148	SAMEA103948848	Harkins CP	2018	28951239	WHM-2018-08-006			skin	colonising	0	5		13	10	0	GCF_009911855.1	0	reads	1034728	232232734	224	83	94.57	71	2782608	135005	32.71
ERR1904136	PSAE006-U2-ic2	PRJEB20148	SAMEA103948849	Harkins CP	2018	28951239	WHM-2018-08-006	Yes		skin	colonising	0	5					GCF_009911855.1	0	reads	1022570	234865656	229	84	94.99	189	2806069	135332	32.81
ERR1904137	PSAE008-E1-C1	PRJEB20148	SAMEA103948850	Harkins CP	2018	28951239	WHM-2018-08-008			skin (atopic dermatitis)	colonising	0	123		2	2	2	GCF_003354605.1	0	reads	689080	155397563	225	55	93.78	132	2769061	50712	32.81
ERR1904139	PSAE008-E1-C3	PRJEB20148	SAMEA103948852	Harkins CP	2018	28951239	WHM-2018-08-008			skin (atopic dermatitis)	colonising	0	123		3	3	1	GCF_003354605.1	0	reads	932966	212192526	227	76	94.44	85	2779425	109614	32.78
ERR1904143	PSAE008-E2-C2	PRJEB20148	SAMEA103948856	Harkins CP	2018	28951239	WHM-2018-08-008			skin (atopic dermatitis)	colonising	0	123		5	5	2	GCF_003354605.1	0	reads	814826	186149652	228	66	94.79	92	2778640	99330	32.78
ERR1904144	PSAE008-E2-C3	PRJEB20148	SAMEA103948857	Harkins CP	2018	28951239	WHM-2018-08-008			skin (atopic dermatitis)	colonising	0	123		7	7	2	GCF_003354605.1	0	reads	1159502	266979683	230	95	94.85	207	2803201	95066	32.89
ERR1904145	PSAE008-E2-C4	PRJEB20148	SAMEA103948858	Harkins CP	2018	28951239	WHM-2018-08-008			skin (atopic dermatitis)	colonising	0	123		4	4	3	GCF_003354605.1	0	reads	702920	161985010	230	58	94.75	95	2779180	81647	32.79
ERR1904146	PSAE008-E2-C5	PRJEB20148	SAMEA103948859	Harkins CP	2018	28951239	WHM-2018-08-008			skin (atopic dermatitis)	colonising	0	123		3	3	1	GCF_003354605.1	0	reads	923516	211243610	228	75	94.61	85	2779870	100208	32.78
ERR1904147	PSAE008-E4-C1	PRJEB20148	SAMEA103948860	Harkins CP	2018	28951239	WHM-2018-08-008			skin (atopic dermatitis)	colonising	0	123		2	2	1	GCF_003354605.1	0	reads	814782	186066365	228	66	94.59	92	2779354	81558	32.78
ERR1904148	PSAE008-E4-C2	PRJEB20148	SAMEA103948861	Harkins CP	2018	28951239	WHM-2018-08-008			skin (atopic dermatitis)	colonising	0	123		4	4	2	GCF_003354605.1	0	reads	1066566	242711122	227	87	94.46	1049	2924570	31835	33.39
ERR1904149	PSAE008-E4-C3	PRJEB20148	SAMEA103948862	Harkins CP	2018	28951239	WHM-2018-08-008			skin (atopic dermatitis)	colonising	0	123		2	2	2	GCF_003354605.1	0	reads	708896	161340181	227	57	94.73	107	2779425	76799	32.79
ERR1904150	PSAE008-E4-C4	PRJEB20148	SAMEA103948863	Harkins CP	2018	28951239	WHM-2018-08-008			skin (atopic dermatitis)	colonising	0	123		4	4	2	GCF_003354605.1	0	reads	744248	169391751	227	60	94.7	108	2778334	72642	32.79
ERR1904151	PSAE008-E4-C5	PRJEB20148	SAMEA103948864	Harkins CP	2018	28951239	WHM-2018-08-008			skin (atopic dermatitis)	colonising	0	123		3	3	1	GCF_003354605.1	0	reads	837772	192862765	230	69	94.75	75	2777636	89752	32.78
ERR1904152	PSAE008-NC1	PRJEB20148	SAMEA103948865	Harkins CP	2018	28951239	WHM-2018-08-008			nose	colonising	0	123		2	2	0	GCF_003354605.1	0	reads	796178	181188024	227	64	94.16	106	2771147	62446	32.79
ERR1904153	PSAE008-NC2	PRJEB20148	SAMEA103948866	Harkins CP	2018	28951239	WHM-2018-08-008			nose	colonising	0	123		1	1	0	GCF_003354605.1	0	reads	1022664	235112493	229	84	94.51	958	2914344	47612	33.37
ERR1904154	PSAE008-NC3	PRJEB20148	SAMEA103948867	Harkins CP	2018	28951239	WHM-2018-08-008	Yes		nose	colonising	0	123					GCF_003354605.1	0	reads	854964	197065015	230	70	94.87	81	2779323	111513	32.78
ERR1904156	PSAE008-NC5	PRJEB20148	SAMEA103948869	Harkins CP	2018	28951239	WHM-2018-08-008			nose	colonising	0	123		4	4	3	GCF_003354605.1	0	reads	850878	199093257	233	71	94.79	76	2779570	132273	32.78
ERR1904157	PSAE008-U2-C1	PRJEB20148	SAMEA103948870	Harkins CP	2018	28951239	WHM-2018-08-008			skin	colonising	0	123		4	4	1	GCF_003354605.1	0	reads	862864	197797029	229	70	94.77	97	2780377	111513	32.79
ERR1904159	PSAE008-U2-C3	PRJEB20148	SAMEA103948872	Harkins CP	2018	28951239	WHM-2018-08-008			skin	colonising	0	123		1	1	1	GCF_003354605.1	0	reads	779802	178687928	229	64	94.67	106	2779032	76797	32.79
ERR1904160	PSAE009-E1-C1	PRJEB20148	SAMEA103948873	Harkins CP	2018	28951239	WHM-2018-08-009			skin (atopic dermatitis)	colonising	0	2867		1	1	0	GCF_014334635.1	0	reads	955606	220201272	230	78	97.02	43	2749910	412441	32.74
ERR1904161	PSAE009-E1-C2	PRJEB20148	SAMEA103948874	Harkins CP	2018	28951239	WHM-2018-08-009			skin (atopic dermatitis)	colonising	0	2867		1	1	0	GCF_014334635.1	0	reads	764946	179163496	234	64	97.37	38	2748777	925537	32.74
ERR1904162	PSAE009-E1-C3	PRJEB20148	SAMEA103948875	Harkins CP	2018	28951239	WHM-2018-08-009			skin (atopic dermatitis)	colonising	0	2867		6	6	3	GCF_014334635.1	0	reads	1422208	321475225	226	115	96.67	36	2748407	812838	32.74
ERR1904163	PSAE009-E1-C4	PRJEB20148	SAMEA103948876	Harkins CP	2018	28951239	WHM-2018-08-009			skin (atopic dermatitis)	colonising	0	2867		3	3	0	GCF_014334635.1	0	reads	1177902	269862576	229	96	96.81	41	2750788	305143	32.74
ERR1904164	PSAE009-E1-C5	PRJEB20148	SAMEA103948877	Harkins CP	2018	28951239	WHM-2018-08-009	Yes		skin (atopic dermatitis)	colonising	0	2867					GCF_014334635.1	0	reads	999176	231250965	231	82	97.11	43	2749449	601848	32.74
ERR1904165	PSAE009-E2-C1	PRJEB20148	SAMEA103948878	Harkins CP	2018	28951239	WHM-2018-08-009			skin (atopic dermatitis)	colonising	0	2867		3	3	2	GCF_014334635.1	0	reads	573978	130889670	228	46	96.79	78	2748235	108350	32.75
ERR1904166	PSAE009-E2-C2	PRJEB20148	SAMEA103948879	Harkins CP	2018	28951239	WHM-2018-08-009			skin (atopic dermatitis)	colonising	0	2867		4	4	1	GCF_014334635.1	0	reads	1132058	262381287	231	94	97.19	39	2747980	714937	32.74
ERR1904167	PSAE009-E2-C3	PRJEB20148	SAMEA103948880	Harkins CP	2018	28951239	WHM-2018-08-009			skin (atopic dermatitis)	colonising	0	2867		5	5	2	GCF_014334635.1	0	reads	997164	230954909	231	82	96.96	42	2750765	486171	32.74
ERR1904168	PSAE009-E2-C4	PRJEB20148	SAMEA103948881	Harkins CP	2018	28951239	WHM-2018-08-009			skin (atopic dermatitis)	colonising	0	2867		1	1	0	GCF_014334635.1	0	reads	1434054	318119296	221	114	96.38	50	2752045	219649	32.75
ERR1904169	PSAE009-E2-C5	PRJEB20148	SAMEA103948882	Harkins CP	2018	28951239	WHM-2018-08-009			skin (atopic dermatitis)	colonising	0	2867		3	3	2	GCF_014334635.1	0	reads	1009000	232996425	230	83	97.12	50	2751611	785244	32.75
ERR1904170	PSAE009-E4-C1	PRJEB20148	SAMEA103948883	Harkins CP	2018	28951239	WHM-2018-08-009			skin (atopic dermatitis)	colonising	0	2867		5	5	2	GCF_014334635.1	0	reads	1161454	265890457	228	95	96.6	58	2751965	261768	32.76
ERR1904171	PSAE009-E4-C2	PRJEB20148	SAMEA103948884	Harkins CP	2018	28951239	WHM-2018-08-009			skin (atopic dermatitis)	colonising	0	2867		4	4	1	GCF_014334635.1	0	reads	1174624	264380439	225	94	96.91	30	2748516	876804	32.74
ERR1904172	PSAE009-E4-C3	PRJEB20148	SAMEA103948885	Harkins CP	2018	28951239	WHM-2018-08-009			skin (atopic dermatitis)	colonising	0	2867		10	10	7	GCF_014334635.1	0	reads	906428	213075422	235	76	97.43	28	2748673	990133	32.74
ERR1904197	PSAE010-E2-18HR-C1	PRJEB20148	SAMEA103948886	Harkins CP	2018	28951239	WHM-2018-08-010			skin (atopic dermatitis)	colonising	0	-		7	7	7	GCF_002356655.1	0	reads	622470	144503126	232	51	97.29	34	2729891	314927	32.71
ERR1904198	PSAE010-E2-IC1	PRJEB20148	SAMEA103948887	Harkins CP	2018	28951239	WHM-2018-08-010			skin (atopic dermatitis)	colonising	0	-		3	3	3	GCF_002356655.1	0	reads	640316	149192001	233	53	97.41	29	2729210	734204	32.72
ERR1904199	PSAE010-E2-IC2	PRJEB20148	SAMEA103948888	Harkins CP	2018	28951239	WHM-2018-08-010			skin (atopic dermatitis)	colonising	0	-		10	10	10	GCF_002356655.1	0	reads	583904	136142075	233	48	97.56	45	2730996	342706	32.72
ERR1904200	PSAE010-E2-IC3	PRJEB20148	SAMEA103948889	Harkins CP	2018	28951239	WHM-2018-08-010			skin (atopic dermatitis)	colonising	0	-		3	3	3	GCF_002356655.1	0	reads	649376	151789993	233	54	97.62	39	2730007	565603	32.72
ERR1904201	PSAE010-E2-IC4	PRJEB20148	SAMEA103948890	Harkins CP	2018	28951239	WHM-2018-08-010			skin (atopic dermatitis)	colonising	0	-		6	6	6	GCF_002356655.1	0	reads	1340968	307097649	229	110	97.2	31	2729461	734203	32.72
ERR1904202	PSAE010-E3-IC1	PRJEB20148	SAMEA103948891	Harkins CP	2018	28951239	WHM-2018-08-010			skin (atopic dermatitis)	colonising	0	-		6	6	6	GCF_002356655.1	0	reads	600322	138073087	230	49	96.87	43	2728843	338467	32.72
ERR1904203	PSAE010-E3-IC2	PRJEB20148	SAMEA103948892	Harkins CP	2018	28951239	WHM-2018-08-010			skin (atopic dermatitis)	colonising	0	-		7	7	8	GCF_002356655.1	0	reads	808700	186991023	231	67	97.24	42	2729960	264099	32.72
ERR1904204	PSAE010-E3-IC3	PRJEB20148	SAMEA103948893	Harkins CP	2018	28951239	WHM-2018-08-010			skin (atopic dermatitis)	colonising	0	-		5	5	5	GCF_002356655.1	0	reads	818074	189039027	231	67	97.38	26	2728335	735032	32.72
ERR1904205	PSAE010-E3-IC4	PRJEB20148	SAMEA103948894	Harkins CP	2018	28951239	WHM-2018-08-010			skin (atopic dermatitis)	colonising	0	-		6	6	6	GCF_002356655.1	0	reads	696388	161761088	232	58	97.45	31	2728065	566545	32.72
ERR1904206	PSAE010-E3-IC5	PRJEB20148	SAMEA103948895	Harkins CP	2018	28951239	WHM-2018-08-010			skin (atopic dermatitis)	colonising	0	-		7	7	7	GCF_002356655.1	0	reads	609896	141893094	232	50	97.65	28	2728840	734203	32.72
ERR1904207	PSAE010-E4-IC1	PRJEB20148	SAMEA103948896	Harkins CP	2018	28951239	WHM-2018-08-010			skin (atopic dermatitis)	colonising	0	-		14	14	14	GCF_002356655.1	0	reads	592866	137963744	232	49	97.39	37	2729535	684716	32.72
ERR1904208	PSAE010-E4-IC2	PRJEB20148	SAMEA103948897	Harkins CP	2018	28951239	WHM-2018-08-010			skin (atopic dermatitis)	colonising	0	-		8	8	8	GCF_002356655.1	0	reads	779122	181329854	232	65	97.42	25	2728635	735032	32.72
ERR1904209	PSAE010-E4-IC3	PRJEB20148	SAMEA103948898	Harkins CP	2018	28951239	WHM-2018-08-010			skin (atopic dermatitis)	colonising	0	-		7	7	7	GCF_002356655.1	0	reads	493800	114781194	232	41	97.33	45	2729295	300432	32.72
ERR1904210	PSAE010-E4-IC4	PRJEB20148	SAMEA103948899	Harkins CP	2018	28951239	WHM-2018-08-010			skin (atopic dermatitis)	colonising	0	-		9	9	9	GCF_002356655.1	0	reads	685912	157963374	230	56	97.23	35	2729849	487061	32.72
ERR1904211	PSAE010-E4-IC5	PRJEB20148	SAMEA103948900	Harkins CP	2018	28951239	WHM-2018-08-010			skin (atopic dermatitis)	colonising	0	-		6	6	6	GCF_002356655.1	0	reads	769656	180097076	234	64	97.42	36	2728638	314099	32.72
ERR1904212	PSAE010-N18HR-C1	PRJEB20148	SAMEA103948901	Harkins CP	2018	28951239	WHM-2018-08-010			nose	colonising	0	-		0	0	0	GCF_002356655.1	0	reads	648110	149828477	231	53	97.43	28	2728617	566362	32.72
ERR1904213	PSAE010-N18HR-C2	PRJEB20148	SAMEA103948902	Harkins CP	2018	28951239	WHM-2018-08-010			nose	colonising	0	-		0	0	0	GCF_002356655.1	0	reads	593904	137183805	230	49	97.36	34	2728748	488590	32.72
ERR1904214	PSAE010-N18HR-C3	PRJEB20148	SAMEA103948903	Harkins CP	2018	28951239	WHM-2018-08-010			nose	colonising	0	-		0	0	0	GCF_002356655.1	0	reads	1295616	294284373	227	105	97.19	34	2729845	684536	32.72
ERR1904215	PSAE010-N18HR-C4	PRJEB20148	SAMEA103948904	Harkins CP	2018	28951239	WHM-2018-08-010			nose	colonising	0	-		0	0	0	GCF_002356655.1	0	reads	777470	180952686	232	64	97.43	34	2729153	453911	32.72
ERR1904216	PSAE010-N18HR-C5	PRJEB20148	SAMEA103948905	Harkins CP	2018	28951239	WHM-2018-08-010	Yes		nose	colonising	0	-					GCF_002356655.1	0	reads	710768	165323235	232	59	97.48	34	2729496	566164	32.72
ERR1904217	PSAE010-N18HR-C6	PRJEB20148	SAMEA103948906	Harkins CP	2018	28951239	WHM-2018-08-010			nose	colonising	0	-		0	0	0	GCF_002356655.1	0	reads	1084408	254958940	235	91	97.67	36	2730042	342706	32.72
ERR1904218	PSAE010-U1-IC1	PRJEB20148	SAMEA103948907	Harkins CP	2018	28951239	WHM-2018-08-010			skin	colonising	0	-		4	4	4	GCF_002356655.1	0	reads	835682	193346662	231	69	97.3	30	2729150	735032	32.72
ERR1904219	PSAE010-U1-IC2	PRJEB20148	SAMEA103948908	Harkins CP	2018	28951239	WHM-2018-08-010			skin	colonising	0	-		7	7	7	GCF_002356655.1	0	reads	521930	121001827	231	43	97.42	37	2729764	378817	32.72
ERR1904220	PSAE010-U1-IC3	PRJEB20148	SAMEA103948909	Harkins CP	2018	28951239	WHM-2018-08-010			skin	colonising	0	-		6	6	8	GCF_002356655.1	0	reads	886968	203975860	229	73	97.02	83	2735164	134659	32.74
ERR1904221	PSAE010-U1-IC4	PRJEB20148	SAMEA103948910	Harkins CP	2018	28951239	WHM-2018-08-010			skin	colonising	0	-		3	3	3	GCF_002356655.1	0	reads	709342	163117490	229	58	97.1	26	2728590	735032	32.71
ERR1904222	PSAE010-U1-IC5	PRJEB20148	SAMEA103948911	Harkins CP	2018	28951239	WHM-2018-08-010			skin	colonising	0	-		7	7	7	GCF_002356655.1	0	reads	534018	122961709	230	44	97.3	37	2729604	301459	32.71
ERR1903978	016-NC2	PRJEB20148	SAMEA103948913	Harkins CP	2018	28951239	WHM-2018-08-016	Yes		nose	colonising	0	45					GCF_009912875.1	0	reads	1581954	368577110	232	132	96.76	35	2704038	393594	32.78
ERR1903979	016-NC3	PRJEB20148	SAMEA103948914	Harkins CP	2018	28951239	WHM-2018-08-016			nose	colonising	0	45		5	1	0	GCF_009912875.1	0	reads	964526	224541075	232	80	96.41	39	2703329	260267	32.79
ERR1903980	016-NC4	PRJEB20148	SAMEA103948915	Harkins CP	2018	28951239	WHM-2018-08-016			nose	colonising	0	45		5	1	1	GCF_009912875.1	0	reads	1286304	300655126	233	107	96.73	33	2703513	393575	32.78
ERR1903981	016-NC5	PRJEB20148	SAMEA103948916	Harkins CP	2018	28951239	WHM-2018-08-016			nose	colonising	0	45		4	0	0	GCF_009912875.1	0	reads	1427596	332759685	233	119	96.67	36	2704311	260668	32.78
ERR1903982	026-NC1	PRJEB20148	SAMEA103948917	Harkins CP	2018	28951239	WHM-2018-08-026			nose	colonising	0	30		5	5	5	GCF_002633785.1	0	reads	1084438	253302248	233	90	95.06	65	2824220	150370	32.73
ERR1903983	026-NC2	PRJEB20148	SAMEA103948918	Harkins CP	2018	28951239	WHM-2018-08-026			nose	colonising	0	30		3	3	3	GCF_002633785.1	0	reads	1406206	329870830	234	118	94.8	62	2823776	129149	32.73
ERR1903984	026-NC3	PRJEB20148	SAMEA103948919	Harkins CP	2018	28951239	WHM-2018-08-026			nose	colonising	0	30		4	4	4	GCF_002633785.1	0	reads	1310022	305210886	232	109	94.69	66	2824221	129149	32.73
ERR1903985	026-NC4	PRJEB20148	SAMEA103948920	Harkins CP	2018	28951239	WHM-2018-08-026			nose	colonising	0	30		5	5	5	GCF_002633785.1	0	reads	1948190	454254569	233	162	94.87	66	2824426	150370	32.73
ERR1903986	026-NC5	PRJEB20148	SAMEA103948921	Harkins CP	2018	28951239	WHM-2018-08-026	Yes		nose	colonising	0	30					GCF_002633785.1	0	reads	1364208	317387855	232	113	94.9	68	2824017	150370	32.74
ERR1903987	039-NC1	PRJEB20148	SAMEA103948922	Harkins CP	2018	28951239	WHM-2018-08-039	Yes		nose	colonising	0	30					GCF_001018975.2	0	reads	1404292	318795044	227	114	94.15	115	2839346	150881	32.73
ERR1903988	039-NC2	PRJEB20148	SAMEA103948923	Harkins CP	2018	28951239	WHM-2018-08-039			nose	colonising	0	30		24	21	4	GCF_001018975.2	0	reads	1728752	390428184	225	140	93.94	141	2843627	92264	32.75
ERR1903989	039-NC3	PRJEB20148	SAMEA103948924	Harkins CP	2018	28951239	WHM-2018-08-039			nose	colonising	0	30		20	17	8	GCF_001018975.2	0	reads	2240966	501676935	223	179	93.61	130	2839914	78428	32.73
ERR1903990	039-NC4	PRJEB20148	SAMEA103948925	Harkins CP	2018	28951239	WHM-2018-08-039			nose	colonising	0	30		20	16	4	GCF_001018975.2	0	reads	894146	196263681	219	70	93.89	722	2934892	36019	33.13
ERR1903991	039-NC5	PRJEB20148	SAMEA103948926	Harkins CP	2018	28951239	WHM-2018-08-039			nose	colonising	0	30		35	32	7	GCF_001018975.2	0	reads	1682906	385397171	229	138	94.53	107	2839677	150975	32.72
ERR1903992	045-NC1	PRJEB20148	SAMEA103948927	Harkins CP	2018	28951239	WHM-2018-08-045			nose	colonising	0	15		2	2	2	GCF_003354865.1	0	reads	1239918	288030680	232	103	97.37	36	2698055	314837	32.74
ERR1903993	045-NC2	PRJEB20148	SAMEA103948928	Harkins CP	2018	28951239	WHM-2018-08-045			nose	colonising	0	15		4	4	4	GCF_003354865.1	0	reads	1138346	264433560	232	94	97.28	42	2698142	249963	32.74
ERR1903994	045-NC3	PRJEB20148	SAMEA103948929	Harkins CP	2018	28951239	WHM-2018-08-045	Yes		nose	colonising	0	15					GCF_003354865.1	0	reads	1204928	281487441	233	100	97.52	48	2699266	251897	32.74
ERR1903995	045-NC4	PRJEB20148	SAMEA103948930	Harkins CP	2018	28951239	WHM-2018-08-045			nose	colonising	0	15		2	2	2	GCF_003354865.1	0	reads	1163090	270876113	232	97	97.4	45	2698830	318483	32.74
ERR1903996	045-NC5	PRJEB20148	SAMEA103948931	Harkins CP	2018	28951239	WHM-2018-08-045			nose	colonising	0	15		1	1	1	GCF_003354865.1	0	reads	1392238	315752181	226	113	97.19	43	2698803	318483	32.74
ERR1903997	057-NC1	PRJEB20148	SAMEA103948932	Harkins CP	2018	28951239	WHM-2018-08-057			nose	colonising	0	582		2	2	0	GCF_009912415.1	0	reads	1681184	368495378	219	132	95.85	55	2683537	251918	32.71
ERR1903998	057-NC2	PRJEB20148	SAMEA103948933	Harkins CP	2018	28951239	WHM-2018-08-057			nose	colonising	0	582		2	0	0	GCF_009912415.1	0	reads	1371798	322909115	235	115	92.72	65	2685178	252269	32.71
ERR1903999	057-NC3	PRJEB20148	SAMEA103948934	Harkins CP	2018	28951239	WHM-2018-08-057			nose	colonising	0	582		1	0	0	GCF_009912415.1	0	reads	1151128	271300894	235	97	95.29	64	2684466	251036	32.71
ERR1904000	057-NC4	PRJEB20148	SAMEA103948935	Harkins CP	2018	28951239	WHM-2018-08-057	Yes		nose	colonising	0	582					GCF_009912415.1	0	reads	1293180	304430727	235	109	95.85	71	2685376	252269	32.71
ERR1904002	059-NC1	PRJEB20148	SAMEA103948937	Harkins CP	2018	28951239	WHM-2018-08-059			nose	colonising	0	30		0	0	0	GCF_013467165.1	0	reads	1218850	285199494	233	102	95.59	73	2804650	162592	32.73
ERR1904003	059-NC2	PRJEB20148	SAMEA103948938	Harkins CP	2018	28951239	WHM-2018-08-059			nose	colonising	0	30		0	0	0	GCF_013467165.1	0	reads	1046060	244560922	233	87	95.49	67	2803917	162592	32.73
ERR1904004	059-NC3	PRJEB20148	SAMEA103948939	Harkins CP	2018	28951239	WHM-2018-08-059			nose	colonising	0	30		0	0	0	GCF_013467165.1	0	reads	1503416	351745731	233	126	95.45	62	2802625	162280	32.73
ERR1904005	059-NC4	PRJEB20148	SAMEA103948940	Harkins CP	2018	28951239	WHM-2018-08-059	Yes		nose	colonising	0	30					GCF_013467165.1	0	reads	1195198	280511301	234	100	95.49	64	2803071	162592	32.73
ERR1904006	059-NC5	PRJEB20148	SAMEA103948941	Harkins CP	2018	28951239	WHM-2018-08-059			nose	colonising	0	30		0	0	0	GCF_013467165.1	0	reads	1077208	252853882	234	90	95.6	65	2803665	162592	32.73
ERR1904007	091-NC1	PRJEB20148	SAMEA103948942	Harkins CP	2018	28951239	WHM-2018-08-091	Yes		nose	colonising	0	30					GCF_009912675.1	0	reads	1300300	297204671	228	106	94.29	81	2805849	86789	32.72
ERR1904008	091-NC2	PRJEB20148	SAMEA103948943	Harkins CP	2018	28951239	WHM-2018-08-091			nose	colonising	0	30		43	33	2	GCF_009912675.1	0	reads	1393780	316556115	227	113	94.49	75	2810318	150918	32.72
ERR1904009	091-NC3	PRJEB20148	SAMEA103948944	Harkins CP	2018	28951239	WHM-2018-08-091			nose	colonising	0	30		85	74	3	GCF_009912675.1	0	reads	1496270	342114323	228	122	94.93	72	2811980	181791	32.72
ERR1904010	091-NC4	PRJEB20148	SAMEA103948945	Harkins CP	2018	28951239	WHM-2018-08-091			nose	colonising	0	30		78	67	2	GCF_009912675.1	0	reads	1717012	395075095	230	141	94.98	84	2813722	181791	32.72
ERR1904011	091-NC5	PRJEB20148	SAMEA103948946	Harkins CP	2018	28951239	WHM-2018-08-091			nose	colonising	0	30		68	57	3	GCF_009912675.1	0	reads	1537552	348559776	226	124	94.66	111	2816982	170951	32.75
ERR1904012	094-NC1	PRJEB20148	SAMEA103948947	Harkins CP	2018	28951239	WHM-2018-08-094			nose	colonising	0	5		0	0	0	GCF_003203655.1	0	reads	436732	102491577	234	36	95	43	2765201	287804	32.74
ERR1904013	094-NC2	PRJEB20148	SAMEA103948948	Harkins CP	2018	28951239	WHM-2018-08-094			nose	colonising	0	5		1	1	0	GCF_003203655.1	0	reads	1691312	381641330	225	136	93.91	33	2765289	324837	32.74
ERR1904014	094-NC3	PRJEB20148	SAMEA103948949	Harkins CP	2018	28951239	WHM-2018-08-094	Yes		nose	colonising	0	5					GCF_003203655.1	0	reads	1402842	325057723	231	116	95.33	35	2763131	325578	32.74
ERR1904015	094-NC4	PRJEB20148	SAMEA103948950	Harkins CP	2018	28951239	WHM-2018-08-094			nose	colonising	0	5		1	1	0	GCF_003203655.1	0	reads	1597710	368837234	230	132	93.01	33	2765842	428370	32.74
ERR1904017	099-NC1	PRJEB20148	SAMEA103948952	Harkins CP	2018	28951239	WHM-2018-08-099			nose	colonising	0	30		5	0	0	GCF_009912675.1	0	reads	1251132	295766301	236	106	95.96	72	2812088	174965	32.72
ERR1904018	099-NC2	PRJEB20148	SAMEA103948953	Harkins CP	2018	28951239	WHM-2018-08-099			nose	colonising	0	30		6	0	0	GCF_009912675.1	0	reads	825428	193926735	234	69	95.92	75	2811698	174964	32.72
ERR1904019	099-NC3	PRJEB20148	SAMEA103948954	Harkins CP	2018	28951239	WHM-2018-08-099	Yes		nose	colonising	0	30					GCF_009912675.1	0	reads	1353330	316077625	233	113	95.78	77	2812374	174965	32.72
ERR1904020	099-NC4	PRJEB20148	SAMEA103948955	Harkins CP	2018	28951239	WHM-2018-08-099			nose	colonising	0	30		6	0	0	GCF_009912675.1	0	reads	1124740	265052607	235	95	95.9	72	2812577	209117	32.72
ERR1904021	099-NC5	PRJEB20148	SAMEA103948956	Harkins CP	2018	28951239	WHM-2018-08-099			nose	colonising	0	30		6	0	0	GCF_009912675.1	0	reads	1442142	339733354	235	121	95.87	72	2811669	174965	32.72
ERR1904022	105-NC1	PRJEB20148	SAMEA103948957	Harkins CP	2018	28951239	WHM-2018-08-105			nose	colonising	0	39		15	15	15	GCF_003194185.1	0	reads	1234604	289987671	234	103	95.89	61	2773548	174828	32.77
ERR1904023	105-NC2	PRJEB20148	SAMEA103948958	Harkins CP	2018	28951239	WHM-2018-08-105			nose	colonising	0	39		17	17	17	GCF_003194185.1	0	reads	1158216	272199412	235	97	95.92	58	2772375	174829	32.77
ERR1904024	105-NC3	PRJEB20148	SAMEA103948959	Harkins CP	2018	28951239	WHM-2018-08-105			nose	colonising	0	39		15	15	15	GCF_003194185.1	0	reads	1387704	319503801	230	114	95.62	62	2773005	174829	32.76
ERR1904025	105-NC4	PRJEB20148	SAMEA103948960	Harkins CP	2018	28951239	WHM-2018-08-105			nose	colonising	0	39		18	18	20	GCF_003194185.1	0	reads	1400288	324816952	231	116	95.74	58	2772674	175059	32.76
ERR1904026	105-NC5	PRJEB20148	SAMEA103948961	Harkins CP	2018	28951239	WHM-2018-08-105	Yes		nose	colonising	0	39					GCF_003194185.1	0	reads	1065988	251218445	235	90	96	59	2773108	174828	32.76
ERR1904027	141-NC1	PRJEB20148	SAMEA103948962	Harkins CP	2018	28951239	WHM-2018-08-141			nose	colonising	0	22		7	1	0	GCF_003184985.1	0	reads	1252138	295253756	235	105	96.68	67	2780667	191419	32.69
ERR1904028	141-NC2	PRJEB20148	SAMEA103948963	Harkins CP	2018	28951239	WHM-2018-08-141			nose	colonising	0	22		12	4	4	GCF_003184985.1	0	reads	1211492	284973828	235	102	97.01	73	2780445	173935	32.69
ERR1904029	141-NC3	PRJEB20148	SAMEA103948964	Harkins CP	2018	28951239	WHM-2018-08-141			nose	colonising	0	22		9	1	0	GCF_003184985.1	0	reads	1041516	242292501	232	86	96.85	75	2780149	173935	32.69
ERR1904030	141-NC4	PRJEB20148	SAMEA103948965	Harkins CP	2018	28951239	WHM-2018-08-141	Yes		nose	colonising	0	22					GCF_003184985.1	0	reads	1284502	301600353	234	108	96.93	67	2780324	176740	32.69
ERR1904031	141-NC5	PRJEB20148	SAMEA103948966	Harkins CP	2018	28951239	WHM-2018-08-141			nose	colonising	0	22		12	4	4	GCF_003184985.1	0	reads	995280	233330935	234	83	96.99	79	2780151	173936	32.69
ERR1904032	147-NC1	PRJEB20148	SAMEA103948967	Harkins CP	2018	28951239	WHM-2018-08-147			nose	colonising	0	30		1	1	1	GCF_013467165.1	0	reads	1086022	254130731	234	91	95.22	95	2826077	134623	32.71
ERR1904033	147-NC2	PRJEB20148	SAMEA103948968	Harkins CP	2018	28951239	WHM-2018-08-147			nose	colonising	0	30		0	0	0	GCF_013467165.1	0	reads	1163070	273089608	234	97	95.27	87	2825143	134623	32.71
ERR1904034	147-NC3	PRJEB20148	SAMEA103948969	Harkins CP	2018	28951239	WHM-2018-08-147	Yes		nose	colonising	0	30					GCF_013467165.1	0	reads	1113482	259672889	233	93	95.21	88	2827444	128878	32.72
ERR1904035	147-NC4	PRJEB20148	SAMEA103948970	Harkins CP	2018	28951239	WHM-2018-08-147			nose	colonising	0	30		1	1	1	GCF_013467165.1	0	reads	922082	216262350	234	77	95.15	77	2822894	134623	32.71
ERR1904036	147-NC5	PRJEB20148	SAMEA103948971	Harkins CP	2018	28951239	WHM-2018-08-147			nose	colonising	0	30		1	1	1	GCF_013467165.1	0	reads	1510902	354448434	234	127	95.22	81	2823567	134623	32.71
ERR1904037	149-NC1	PRJEB20148	SAMEA103948972	Harkins CP	2018	28951239	WHM-2018-08-149			nose	colonising	0	30		4	4	3	GCF_001018975.2	0	reads	1688444	383199256	226	137	93.72	83	2814480	132249	32.72
ERR1904038	149-NC2	PRJEB20148	SAMEA103948973	Harkins CP	2018	28951239	WHM-2018-08-149			nose	colonising	0	30		1	1	1	GCF_001018975.2	0	reads	637196	144180251	226	51	94.38	143	2815372	71339	32.76
ERR1904039	149-NC3	PRJEB20148	SAMEA103948974	Harkins CP	2018	28951239	WHM-2018-08-149			nose	colonising	0	30		1	1	0	GCF_001018975.2	0	reads	1600042	359083376	224	128	94.21	97	2817987	150918	32.73
ERR1904040	149-NC4	PRJEB20148	SAMEA103948975	Harkins CP	2018	28951239	WHM-2018-08-149			nose	colonising	0	30		21	21	21	GCF_001018975.2	0	reads	1416092	326271389	230	116	94.57	88	2817309	150919	32.72
ERR1904041	149-NC5	PRJEB20148	SAMEA103948976	Harkins CP	2018	28951239	WHM-2018-08-149	Yes		nose	colonising	0	30					GCF_001018975.2	0	reads	1411034	325993287	231	116	94.83	85	2815429	138592	32.72
ERR1904042	153-NC1	PRJEB20148	SAMEA103948977	Harkins CP	2018	28951239	WHM-2018-08-153			nose	colonising	0	582		3	2	0	GCF_009912415.1	0	reads	636870	149547275	234	53	98.61	51	2681433	318712	32.7
ERR1904043	153-NC2	PRJEB20148	SAMEA103948978	Harkins CP	2018	28951239	WHM-2018-08-153	Yes		nose	colonising	0	582					GCF_009912415.1	0	reads	1288344	301757472	234	108	98.56	49	2681548	243857	32.7
ERR1904044	153-NC3	PRJEB20148	SAMEA103948979	Harkins CP	2018	28951239	WHM-2018-08-153			nose	colonising	0	582		5	4	0	GCF_009912415.1	0	reads	1560032	360502923	231	129	98.34	52	2682445	300407	32.7
[truncated: 772 more rows]

## Sheet: Variables
Variable	Comment
[truncated: 30 more rows]
