# Supplementary material for: Niche-specific genome degradation and convergent evolution shaping Staphylococcus aureus adaptation during severe infections
Source: eLife journal article supplement (doi:10.7554/elife.77195), 2022-06-08
Supplement: supp [file elife-77195-supp-v1.zip › elife_poa_e77195_Supplementary_file_5.xlsx]

## Sheet: all
Operon enrichment analysis (complete dataset)
OPERON	operon_gene_list	n_mutations	operon_length	enrichment	glm.pval
agrB-agrD-agrC-agrA	SAUSA300_1989,SAUSA300_1990,SAUSA300_1991,SAUSA300_1992	28	2.758	12.7356	1.13144e-21
SAUSA300_pUSA030010-SAUSA300_pUSA030011-SAUSA300_pUSA030012-SAUSA300_pUSA030013-SAUSA300_pUSA030014-SAUSA300_pUSA030015-SAUSA300_pUSA030016-SAUSA300_pUSA030017-SAUSA300_pUSA030018-SAUSA300_pUSA030019-SAUSA300_pUSA030020	SAUSA300_pUSA030010,SAUSA300_pUSA030011,SAUSA300_pUSA030012,SAUSA300_pUSA030013,SAUSA300_pUSA030014,SAUSA300_pUSA030015,SAUSA300_pUSA030016,SAUSA300_pUSA030017,SAUSA300_pUSA030018,SAUSA300_pUSA030019,SAUSA300_pUSA030020	0	11.594	0	1.64661e-05
sucB-sucA	SAUSA300_1305,SAUSA300_1306	13	4.08	3.99705	4.58358e-05
walR-walK-walH-walI	SAUSA300_0020,SAUSA300_0021,SAUSA300_0022,SAUSA300_0023	13	4.656	3.50257	0.00017426
recU-pbp2	SAUSA300_1340,SAUSA300_1341	8	2.806	3.5765	0.00286263
secE-nusG	SAUSA300_0520,SAUSA300_0521	4	0.743	6.75347	0.00360016
SAUSA300_0072-SAUSA300_0073-opp-3B-opp-3C-SAUSA300_0076-SAUSA300_0077	SAUSA300_0072,SAUSA300_0073,SAUSA300_0074,SAUSA300_0075,SAUSA300_0076,SAUSA300_0077	0	5.276	0	0.00369661
arcC-arcD-arcB-arcA	SAUSA300_2567,SAUSA300_2568,SAUSA300_2569,SAUSA300_2570	0	4.757	0	0.00584727
SAUSA300_2398-SAUSA300_2399	SAUSA300_2398,SAUSA300_2399	5	1.431	4.38315	0.00782881
sigB-rsbW-rsbV-rsbU	SAUSA300_2022,SAUSA300_2023,SAUSA300_2024,SAUSA300_2025	7	2.672	3.28638	0.00843896
acyP-xpaC-SAUSA300_1299	SAUSA300_1297,SAUSA300_1298,SAUSA300_1299	6	2.085	3.60995	0.00940103
thiE-thiM-thiD-tenA	SAUSA300_2047,SAUSA300_2048,SAUSA300_2049,SAUSA300_2050	7	2.93	2.997	0.0138511
dat-SAUSA300_1697	SAUSA300_1696,SAUSA300_1697	6	2.261	3.32895	0.0138898
holA-comEC-comEB	SAUSA300_1546,SAUSA300_1547,SAUSA300_1548	8	3.668	2.736	0.0145134
addB-addA	SAUSA300_0869,SAUSA300_0870	1	7.13	0.175941	0.015042
cstA-cstB-sqr	SAUSA300_0085,SAUSA300_0086,SAUSA300_0087	0	3.644	0	0.0158712
coaBC-priA	SAUSA300_1104,SAUSA300_1105	0	3.607	0	0.0164143
hisI-hisF-hisA-hisH-hisB-SAUSA300_2610-hisD-hisG-hisZ	SAUSA300_2605,SAUSA300_2606,SAUSA300_2607,SAUSA300_2608,SAUSA300_2609,SAUSA300_2610,SAUSA300_2611,SAUSA300_2612,SAUSA300_2613	1	6.925	0.181149	0.0175379
yjbH-SAUSA300_0904	SAUSA300_0903,SAUSA300_0904	4	1.194	4.20254	0.0201682
sbnA-sbnB-sbnC-sbnD-sbnE-sbnF-sbnG-sbnH-sbnI	SAUSA300_0118,SAUSA300_0119,SAUSA300_0120,SAUSA300_0121,SAUSA300_0122,SAUSA300_0123,SAUSA300_0124,SAUSA300_0125,SAUSA300_0126	3	11.157	0.33731	0.0213513
SAUSA300_1217-SAUSA300_1218-SAUSA300_1219-SAUSA300_1220	SAUSA300_1217,SAUSA300_1218,SAUSA300_1219,SAUSA300_1220	0	3.302	0	0.0216897
gatB-gatA-gatC	SAUSA300_1880,SAUSA300_1881,SAUSA300_1882	0	3.201	0	0.0238005
SAUSA300_1660-thiI-nifZ	SAUSA300_1660,SAUSA300_1661,SAUSA300_1662	0	3.176	0	0.0243551
rpoB-rpoC	SAUSA300_0527,SAUSA300_0528	12	7.311	2.05902	0.0250104
recD2-SAUSA300_1577	SAUSA300_1576,SAUSA300_1577	0	3.147	0	0.0250153
def2-fmt-sun-rlmN-stp1-pknB	SAUSA300_1108,SAUSA300_1109,SAUSA300_1110,SAUSA300_1111,SAUSA300_1112,SAUSA300_1113	11	6.558	2.10415	0.0276304
vraF-vraG	SAUSA300_0647,SAUSA300_0648	6	2.64	2.85104	0.0285502
cntM-cntL-cntK	SAUSA300_2412,SAUSA300_2413,SAUSA300_2414	0	2.944	0	0.0301891
SAUSA300_2406-cntF-cntD-cnzC-cntB-cntA	SAUSA300_2406,SAUSA300_2407,SAUSA300_2408,SAUSA300_2409,SAUSA300_2410,SAUSA300_2411	1	6.171	0.203283	0.0307708
SAUSA300_0931-SAUSA300_0932	SAUSA300_0931,SAUSA300_0932	3	0.793	4.74574	0.0317361
SAUSA300_1439-SAUSA300_1440	SAUSA300_1439,SAUSA300_1440	0	2.888	0	0.0318041
SAUSA300_1118-fakA	SAUSA300_1118,SAUSA300_1119	5	2.035	3.08221	0.0336794
apt-recJ	SAUSA300_1591,SAUSA300_1592	0	2.813	0	0.0341093
vraR-vraS-vraT-vraU	SAUSA300_1865,SAUSA300_1866,SAUSA300_1867,SAUSA300_1868	6	2.761	2.72609	0.0349211
SAUSA300_2425-SAUSA300_2426-SAUSA300_2427-SAUSA300_2428-SAUSA300_2429	SAUSA300_2425,SAUSA300_2426,SAUSA300_2427,SAUSA300_2428,SAUSA300_2429	0	2.721	0	0.0371777
SAUSA300_1182-SAUSA300_1183	SAUSA300_1182,SAUSA300_1183	0	2.627	0	0.0406125
copA-SAUSA300_0079	SAUSA300_0078,SAUSA300_0079	0	2.587	0	0.0421737
SAUSA300_0298-SAUSA300_0299-SAUSA300_0300-SAUSA300_0301-SAUSA300_0302	SAUSA300_0298,SAUSA300_0299,SAUSA300_0300,SAUSA300_0301,SAUSA300_0302	0	2.533	0	0.044382
gcp-rimI-tsaB-tsaE	SAUSA300_2002,SAUSA300_2003,SAUSA300_2004,SAUSA300_2005	0	2.532	0	0.044424
saeS-saeR-saeQ	SAUSA300_0690,SAUSA300_0691,SAUSA300_0692	5	2.189	2.86537	0.044798
hflX-SAUSA300_1199	SAUSA300_1198,SAUSA300_1199	0	2.495	0	0.0460086
opuBA-opuBB	SAUSA300_0706,SAUSA300_0707	0	2.484	0	0.0464911
lytS-lytR	SAUSA300_0254,SAUSA300_0255	0	2.482	0	0.0465794
ausA-SAUSA300_0182	SAUSA300_0181,SAUSA300_0182	2	7.832	0.320342	0.0468978
pgpB-murG-SAUSA300_1312	SAUSA300_1310,SAUSA300_1311,SAUSA300_1312	5	2.222	2.82281	0.0474584
ilvD-ilvB-ilvH	SAUSA300_2006,SAUSA300_2007,SAUSA300_2008	7	3.739	2.34854	0.0474746
tatC-tatA	SAUSA300_0347,SAUSA300_0348	3	0.942	3.99509	0.0507448
cydA-cydB	SAUSA300_0986,SAUSA300_0987	0	2.377	0	0.0514726
SAUSA300_2086-hmrA	SAUSA300_2086,SAUSA300_2087	0	2.377	0	0.0514726
arcC-arcB-SAUSA300_0063-arcD-arcA	SAUSA300_0061,SAUSA300_0062,SAUSA300_0063,SAUSA300_0064,SAUSA300_0065	1	5.458	0.229838	0.0521522
ltaA-ugtP	SAUSA300_0917,SAUSA300_0918	0	2.343	0	0.0531711
recO-era-cdd-dgkA-ybeY-phoH	SAUSA300_1526,SAUSA300_1527,SAUSA300_1528,SAUSA300_1529,SAUSA300_1530,SAUSA300_1531	7	3.851	2.28024	0.054634
sek-seq-SAUSA300_0802-SAUSA300_0803	SAUSA300_0800,SAUSA300_0801,SAUSA300_0802,SAUSA300_0803	0	2.299	0	0.0554577
SAUSA300_0383-SAUSA300_0384-SAUSA300_0385	SAUSA300_0383,SAUSA300_0384,SAUSA300_0385	0	2.286	0	0.0561531
folP-folB-folK	SAUSA300_0492,SAUSA300_0493,SAUSA300_0494	4	1.619	3.09934	0.0565035
treP-treC-treR	SAUSA300_0448,SAUSA300_0449,SAUSA300_0450	7	3.884	2.26087	0.0568767
trnaG-trnaC-trnaQ-trnaH-trnaW-trnaY-trnaT-trnaL-trnaD-trnaM-trnaS-trnaD-trnaS-trnaM-trnaM-trnaA-trnaP-trnaR-trnaL-trnaG-trnaL-trnaK-trnaT-trnaV-rrfC	SAUSA300_1813,SAUSA300_1814,SAUSA300_1815,SAUSA300_1816,SAUSA300_1817,SAUSA300_1818,SAUSA300_1819,SAUSA300_1820,SAUSA300_1821,SAUSA300_1822,SAUSA300_1823,SAUSA300_1824,SAUSA300_1825,SAUSA300_1826,SAUSA300_1827,SAUSA300_1828,SAUSA300_1829,SAUSA300_1830,SAUSA300_1831,SAUSA300_1832,SAUSA300_1833,SAUSA300_1834,SAUSA300_1835,SAUSA300_1836,SAUSA300_1837	0	2.258	0	0.0576824
rbsK-rbsD-rbsU	SAUSA300_0262,SAUSA300_0263,SAUSA300_0264	0	2.242	0	0.0585761
ssl11-SAUSA300_0408	SAUSA300_0407,SAUSA300_0408	0	2.207	0	0.0605827
SAUSA300_1741-SAUSA300_1742-SAUSA300_1743	SAUSA300_1741,SAUSA300_1742,SAUSA300_1743	3	1.011	3.72243	0.0612825
cdr-SAUSA300_0874	SAUSA300_0873,SAUSA300_0874	0	2.192	0	0.0614649
greA-udk-SAUSA300_1569-SAUSA300_1570-SAUSA300_1571	SAUSA300_1567,SAUSA300_1568,SAUSA300_1569,SAUSA300_1570,SAUSA300_1571	7	3.971	2.21133	0.0630876
rpsP-rimM-trmD-rplS	SAUSA300_1131,SAUSA300_1132,SAUSA300_1133,SAUSA300_1134	0	2.156	0	0.0636385
budA1-budB	SAUSA300_2165,SAUSA300_2166	5	2.405	2.60802	0.0640768
SAUSA300_1532-SAUSA300_1533-SAUSA300_1534	SAUSA300_1532,SAUSA300_1533,SAUSA300_1534	5	2.405	2.60802	0.0640768
recN-argR	SAUSA300_1468,SAUSA300_1469	0	2.147	0	0.0641946
SAUSA300_0824-SAUSA300_0825	SAUSA300_0824,SAUSA300_0825	0	2.121	0	0.0658304
zur-znuB-znuC	SAUSA300_1514,SAUSA300_1515,SAUSA300_1516	0	2.087	0	0.0680369
fabZ-murA1-SAUSA300_2056	SAUSA300_2054,SAUSA300_2055,SAUSA300_2056	0	2.083	0	0.0683017
SAUSA300_0039-SAUSA300_0040	SAUSA300_0039,SAUSA300_0040	0	2.077	0	0.0687009
deoD1-tet38	SAUSA300_0138,SAUSA300_0139	0	2.066	0	0.0694392
SAUSA300_1376-SAUSA300_1377-SAUSA300_1378	SAUSA300_1376,SAUSA300_1377,SAUSA300_1378	0	2.006	0	0.0736188
groEL-groES	SAUSA300_1982,SAUSA300_1983	0	1.976	0	0.075809
SAUSA300_1519-trmK	SAUSA300_1519,SAUSA300_1520	4	1.78	2.81901	0.0766376
argF-arcC1	SAUSA300_1062,SAUSA300_1063	0	1.956	0	0.077308
SAUSA300_1785-ecsA	SAUSA300_1785,SAUSA300_1786	0	1.956	0	0.077308
rocD-gudB	SAUSA300_0860,SAUSA300_0861	5	2.543	2.46649	0.0787712
SAUSA300_0567-SAUSA300_0568	SAUSA300_0567,SAUSA300_0568	3	1.115	3.37522	0.079244
sepA-sdrM	SAUSA300_2127,SAUSA300_2128	0	1.915	0	0.0804815
truB-ribC	SAUSA300_1164,SAUSA300_1165	0	1.903	0	0.0814367
SAUSA300_1479-SAUSA300_1480-SAUSA300_1481-SAUSA300_1482	SAUSA300_1479,SAUSA300_1480,SAUSA300_1481,SAUSA300_1482	1	4.843	0.259025	0.0818997
SAUSA300_0442-SAUSA300_0443	SAUSA300_0442,SAUSA300_0443	0	1.891	0	0.0824041
nos-pheA	SAUSA300_1895,SAUSA300_1896	0	1.89	0	0.0824852
SAUSA300_2020-SAUSA300_2021	SAUSA300_2020,SAUSA300_2021	5	2.598	2.41428	0.0851602
comGD-comGC-comGB-comGA-SAUSA300_1505-SAUSA300_1506-glk-SAUSA300_1508-SAUSA300_1509-SAUSA300_1510	SAUSA300_1501,SAUSA300_1502,SAUSA300_1503,SAUSA300_1504,SAUSA300_1505,SAUSA300_1506,SAUSA300_1507,SAUSA300_1508,SAUSA300_1509,SAUSA300_1510	10	6.947	1.80575	0.0878775
queE-queD-queC	SAUSA300_0695,SAUSA300_0696,SAUSA300_0697	0	1.806	0	0.0896223
SAUSA300_0778-SAUSA300_0779	SAUSA300_0778,SAUSA300_0779	2	0.564	4.44843	0.0901604
bmfBB-bfmBAB-bfmBAA-lpdA	SAUSA300_1464,SAUSA300_1465,SAUSA300_1466,SAUSA300_1467	1	4.699	0.266963	0.0909761
SAUSA300_1684-SAUSA300_1685	SAUSA300_1684,SAUSA300_1685	0	1.764	0	0.0934393
gntP-gntK-gntR-SAUSA300_2445	SAUSA300_2442,SAUSA300_2443,SAUSA300_2444,SAUSA300_2445	1	4.65	0.269776	0.0942836
SAUSA300_2095-manA	SAUSA300_2095,SAUSA300_2096	3	1.199	3.13876	0.0955545
glnR-glnA	SAUSA300_1200,SAUSA300_1201	0	1.727	0	0.0969485
SAUSA300_0666-SAUSA300_0667-SAUSA300_0668	SAUSA300_0666,SAUSA300_0667,SAUSA300_0668	0	1.712	0	0.0984118
clpX-tig	SAUSA300_1621,SAUSA300_1622	5	2.714	2.31109	0.099645
SAUSA300_0091-SAUSA300_0092	SAUSA300_0091,SAUSA300_0092	0	1.674	0	0.102228
SAUSA300_1703-leuS	SAUSA300_1703,SAUSA300_1704	5	2.75	2.28083	0.104421
rnpA-rpmH	SAUSA300_2647,SAUSA300_2648	2	0.611	4.10624	0.105115
efp-pepQ2	SAUSA300_1490,SAUSA300_1491	0	1.644	0	0.105355
SAUSA300_2216-SAUSA300_2217	SAUSA300_2216,SAUSA300_2217	0	1.644	0	0.105355
esaA-essA-esaB-essB-essC-esxC-esxB-esaE-esxD-esaD-esaG	SAUSA300_0279,SAUSA300_0280,SAUSA300_0281,SAUSA300_0282,SAUSA300_0283,SAUSA300_0284,SAUSA300_0285,SAUSA300_0286,SAUSA300_0287,SAUSA300_0288,SAUSA300_0289	6	13.608	0.553112	0.106201
mnaA-upp-glyA-SAUSA300_2068	SAUSA300_2065,SAUSA300_2066,SAUSA300_2067,SAUSA300_2068	6	3.597	2.09251	0.106613
menF-menD-menH-menB	SAUSA300_0945,SAUSA300_0946,SAUSA300_0947,SAUSA300_0948	1	4.475	0.280326	0.107084
smc-ftsY-SAUSA300_1129-ffh	SAUSA300_1127,SAUSA300_1128,SAUSA300_1129,SAUSA300_1130	2	6.528	0.384331	0.107424
SAUSA300_2451-SAUSA300_2452	SAUSA300_2451,SAUSA300_2452	0	1.62	0	0.107932
cspR-queG	SAUSA300_1805,SAUSA300_1806	0	1.602	0	0.10991
uppS-cdsA	SAUSA300_1153,SAUSA300_1154	0	1.559	0	0.114799
SAUSA300_1623-SAUSA300_1624	SAUSA300_1623,SAUSA300_1624	0	1.556	0	0.115149
SAUSA300_1795-SAUSA300_1796	SAUSA300_1795,SAUSA300_1796	0	1.537	0	0.117392
vraA-vraB-vraC	SAUSA300_0559,SAUSA300_0560,SAUSA300_0561	5	2.857	2.19541	0.119401
SAUSA300_0476-glmU	SAUSA300_0476,SAUSA300_0477	0	1.506	0	0.121157
lspA-SAUSA300_1090	SAUSA300_1089,SAUSA300_1090	0	1.408	0	0.133969
dnaE-pde2	SAUSA300_1649,SAUSA300_1650	1	4.159	0.301625	0.134627
ctaB-ctaM	SAUSA300_1016,SAUSA300_1017	0	1.397	0	0.135499
xerD-fur	SAUSA300_1447,SAUSA300_1448	0	1.385	0	0.137191
trmB-SAUSA300_1695	SAUSA300_1694,SAUSA300_1695	0	1.384	0	0.137333
SAUSA300_pUSA030034-SAUSA300_pUSA030035	SAUSA300_pUSA030034,SAUSA300_pUSA030035	0	1.372	0	0.13905
SAUSA300_1884-ligA-pcrA-pcrB	SAUSA300_1884,SAUSA300_1885,SAUSA300_1886,SAUSA300_1887	2	6.1	0.411298	0.139926
fakB2-dfrA	SAUSA300_1318,SAUSA300_1319	0	1.333	0	0.144799
SAUSA300_pUSA030021-SAUSA300_pUSA030022	SAUSA300_pUSA030021,SAUSA300_pUSA030022	0	1.326	0	0.145859
rplK-rplA	SAUSA300_0522,SAUSA300_0523	0	1.322	0	0.146468
czrA-czrB	SAUSA300_2098,SAUSA300_2099	0	1.302	0	0.149559
pyrH-frr	SAUSA300_1151,SAUSA300_1152	0	1.295	0	0.150659
ptpA-SAUSA300_1863	SAUSA300_1862,SAUSA300_1863	2	0.746	3.36316	0.152947
SAUSA300_0275-SAUSA300_0276	SAUSA300_0275,SAUSA300_0276	0	1.274	0	0.154012
dck-dgk	SAUSA300_0541,SAUSA300_0542	0	1.272	0	0.154336
ugpQ-maoC	SAUSA300_0030,SAUSA300_0031	0	1.268	0	0.154986
SAUSA300_0259-bglA	SAUSA300_0259,SAUSA300_0260	4	2.243	2.23711	0.155054
SAUSA300_0056-SAUSA300_0057-SAUSA300_0058-SAUSA300_0059	SAUSA300_0056,SAUSA300_0057,SAUSA300_0058,SAUSA300_0059	0	1.267	0	0.155149
mnmA-iscS	SAUSA300_1578,SAUSA300_1579	4	2.261	2.2193	0.158706
folC-valS	SAUSA300_1610,SAUSA300_1611	1	3.914	0.320505	0.16062
SAUSA300_0393-SAUSA300_0394	SAUSA300_0393,SAUSA300_0394	0	1.223	0	0.162514
mecR1-rplL	SAUSA300_0033,SAUSA300_0035	0	1.218	0	0.163376
ptpB-SAUSA300_2070-prmC-prfA-tdk	SAUSA300_2069,SAUSA300_2070,SAUSA300_2071,SAUSA300_2072,SAUSA300_2073	6	4.045	1.86075	0.167235
ulaA-SAUSA300_0331-SAUSA300_0332-SAUSA300_0333	SAUSA300_0330,SAUSA300_0331,SAUSA300_0332,SAUSA300_0333	6	4.05	1.85846	0.168002
SAUSA300_0655-SAUSA300_0656	SAUSA300_0655,SAUSA300_0656	0	1.189	0	0.16848
gpsA-engA	SAUSA300_1363,SAUSA300_1364	4	2.325	2.15821	0.172043
rplT-rpmI-infC	SAUSA300_1625,SAUSA300_1626,SAUSA300_1627	0	1.159	0	0.173952
lrgA-lrgB	SAUSA300_0256,SAUSA300_0257	0	1.137	0	0.178095
rpsF-ssb-rpsR	SAUSA300_0366,SAUSA300_0367,SAUSA300_0368	0	1.114	0	0.182549
SAUSA300_pUSA030004-SAUSA300_pUSA030005	SAUSA300_pUSA030004,SAUSA300_pUSA030005	0	1.102	0	0.184924
SAUSA300_1210-SAUSA300_1211-SAUSA300_1212-SAUSA300_1213	SAUSA300_1210,SAUSA300_1211,SAUSA300_1212,SAUSA300_1213	0	1.084	0	0.188553
srtB-isdG	SAUSA300_1034,SAUSA300_1035	0	1.076	0	0.190193
SAUSA300_0704-recQ1	SAUSA300_0704,SAUSA300_0705	1	3.676	0.341256	0.190502
SAUSA300_0670-SAUSA300_0671	SAUSA300_0670,SAUSA300_0671	5	3.301	1.90012	0.194007
SAUSA300_2322-cobI	SAUSA300_2322,SAUSA300_2323	3	1.613	2.33315	0.197938
SAUSA300_1329-ilvA1-ald1	SAUSA300_1329,SAUSA300_1330,SAUSA300_1331	1	3.606	0.347881	0.200272
rsmD-coaD	SAUSA300_1023,SAUSA300_1024	0	1.026	0	0.200827
ipk-purR-yabJ-spoVG	SAUSA300_0472,SAUSA300_0473,SAUSA300_0474,SAUSA300_0475	4	2.457	2.04226	0.201241
gapR-gapA-pgk-tpiA-pgm-eno	SAUSA300_0755,SAUSA300_0756,SAUSA300_0757,SAUSA300_0758,SAUSA300_0759,SAUSA300_0760	3	7.242	0.519659	0.202354
tauE-cstR	SAUSA300_0083,SAUSA300_0084	0	1.015	0	0.20326
SAUSA300_0293-SAUSA300_0294	SAUSA300_0293,SAUSA300_0294	0	1.011	0	0.204153
rbgA-rnhB	SAUSA300_1136,SAUSA300_1137	3	1.635	2.30176	0.204314
pitR-pitA	SAUSA300_0649,SAUSA300_0650	3	1.64	2.29474	0.205775
aroA-aroB-aroC	SAUSA300_1355,SAUSA300_1356,SAUSA300_1357	1	3.564	0.35198	0.206364
menC-menE	SAUSA300_1735,SAUSA300_1737	4	2.484	2.02006	0.207486
nrdI-nrdE-nrdF	SAUSA300_0715,SAUSA300_0716,SAUSA300_0717	1	3.555	0.352871	0.207693
SAUSA300_0792-SAUSA300_0793	SAUSA300_0792,SAUSA300_0793	0	0.993	0	0.208229
pepT-SAUSA300_0728-SAUSA300_0729	SAUSA300_0727,SAUSA300_0728,SAUSA300_0729	4	2.513	1.99675	0.214294
SAUSA300_0866-spsA-spsB	SAUSA300_0866,SAUSA300_0867,SAUSA300_0868	3	1.695	2.22028	0.222132
pheS-pheT	SAUSA300_1037,SAUSA300_1038	1	3.46	0.36256	0.22223
rpmA-SAUSA300_1602-rplU	SAUSA300_1601,SAUSA300_1602,SAUSA300_1603	0	0.93	0	0.223276
hemY-hemH-hemE	SAUSA300_1781,SAUSA300_1782,SAUSA300_1783	1	3.442	0.364456	0.225093
SAUSA300_2102-SAUSA300_2103	SAUSA300_2102,SAUSA300_2103	3	1.707	2.20467	0.225769
dhaK-dhaL-dhaM-SAUSA300_0639	SAUSA300_0636,SAUSA300_0637,SAUSA300_0638,SAUSA300_0639	4	2.562	1.95856	0.226029
rplJ-rplL	SAUSA300_0524,SAUSA300_0525	0	0.911	0	0.228067
argH-argG	SAUSA300_0863,SAUSA300_0864	4	2.574	1.94943	0.228947
SAUSA300_2294-SAUSA300_2295	SAUSA300_2294,SAUSA300_2295	0	0.907	0	0.229091
SAUSA300_0338-SAUSA300_0339-SAUSA300_0340	SAUSA300_0338,SAUSA300_0339,SAUSA300_0340	4	2.581	1.94414	0.230657
SAUSA300_2310-SAUSA300_2311	SAUSA300_2310,SAUSA300_2311	0	0.895	0	0.232197
SAUSA300_pUSA030023-SAUSA300_pUSA030024	SAUSA300_pUSA030023,SAUSA300_pUSA030024	0	0.879	0	0.236418
tarI-tarJ-tarL-tarS	SAUSA300_0249,SAUSA300_0250,SAUSA300_0251,SAUSA300_0252	2	5.201	0.482391	0.240088
SAUSA300_2419-SAUSA300_2420	SAUSA300_2419,SAUSA300_2420	0	0.856	0	0.242649
lytH-dtd-relA	SAUSA300_1588,SAUSA300_1589,SAUSA300_1590	5	3.546	1.76883	0.243399
graX-graR-graS	SAUSA300_0644,SAUSA300_0645,SAUSA300_0646	4	2.646	1.89638	0.246807
SAUSA300_0806-SAUSA300_0807-SAUSA300_0808	SAUSA300_0806,SAUSA300_0807,SAUSA300_0808	0	0.837	0	0.247948
ilvC-leuA-leuB-leuC-leuD-ilvA2	SAUSA300_2009,SAUSA300_2010,SAUSA300_2011,SAUSA300_2012,SAUSA300_2013,SAUSA300_2014	3	6.852	0.549237	0.248054
SAUSA300_2641-SAUSA300_2642	SAUSA300_2641,SAUSA300_2642	0	0.816	0	0.253971
SAUSA300_2213-femX	SAUSA300_2213,SAUSA300_2214	6	4.549	1.65459	0.254184
truA-ecfT-cbiO1-cbiO	SAUSA300_2173,SAUSA300_2174,SAUSA300_2175,SAUSA300_2176	1	3.27	0.383626	0.254304
SAUSA300_1492-SAUSA300_1493	SAUSA300_1492,SAUSA300_1493	0	0.813	0	0.254846
est-rnr-smpB	SAUSA300_0763,SAUSA300_0764,SAUSA300_0765	5	3.632	1.72695	0.262026
SAUSA300_1803-SAUSA300_1804	SAUSA300_1803,SAUSA300_1804	0	0.776	0	0.26595
psmβ1-psmβ2	SAUSA300_1067,SAUSA300_1068	1	0.325	3.85987	0.26938
SAUSA300_1669-serA	SAUSA300_1669,SAUSA300_1670	4	2.751	1.824	0.273903
ung-SAUSA300_0564	SAUSA300_0563,SAUSA300_0564	2	1.037	2.4194	0.275615
deoC1-deoB	SAUSA300_0140,SAUSA300_0141	3	1.868	2.01465	0.276773
SAUSA300_1303-SAUSA300_1304	SAUSA300_1303,SAUSA300_1304	2	1.041	2.4101	0.277446
cysE-cysS-mrnC-SAUSA300_0517-SAUSA300_0518	SAUSA300_0514,SAUSA300_0515,SAUSA300_0516,SAUSA300_0517,SAUSA300_0518	5	3.706	1.69247	0.278563
isdI-SAUSA300_0169	SAUSA300_0168,SAUSA300_0169	0	0.716	0	0.28527
tagG-tagB-tagX	SAUSA300_0625,SAUSA300_0626,SAUSA300_0627	1	3.072	0.408352	0.292446
mnhG-mnhF-mnhE-mnhD-mnhC-mnhB-mnhA	SAUSA300_0849,SAUSA300_0850,SAUSA300_0851,SAUSA300_0852,SAUSA300_0853,SAUSA300_0854,SAUSA300_0855	7	5.764	1.52346	0.296811
purE-purK-purC-purS-purQ-purL-purF-purM-purN-purH-purD	SAUSA300_0966,SAUSA300_0967,SAUSA300_0968,SAUSA300_0969,SAUSA300_0970,SAUSA300_0971,SAUSA300_0972,SAUSA300_0973,SAUSA300_0974,SAUSA300_0975,SAUSA300_0976	6	11.171	0.673775	0.298869
SAUSA300_0794-SAUSA300_0795	SAUSA300_0794,SAUSA300_0795	0	0.675	0	0.299502
SAUSA300_2624-SAUSA300_2625	SAUSA300_2624,SAUSA300_2625	2	1.095	2.29125	0.30247
SAUSA300_1351-SAUSA300_1352-SAUSA300_1353-SAUSA300_1354	SAUSA300_1351,SAUSA300_1352,SAUSA300_1353,SAUSA300_1354	1	3.021	0.415246	0.303125
ccrB-ccrA	SAUSA300_0037,SAUSA300_0038	1	2.999	0.418292	0.307846
mvaK1-mvaD-mvaK2	SAUSA300_0572,SAUSA300_0573,SAUSA300_0574	1	2.997	0.418571	0.308278
SAUSA300_0609-mnhA2-mnhB2-mnhC2-mnhD2-mnhE2-mnhF2-mnhG2	SAUSA300_0609,SAUSA300_0610,SAUSA300_0611,SAUSA300_0612,SAUSA300_0613,SAUSA300_0614,SAUSA300_0615,SAUSA300_0616	3	6.414	0.586743	0.309958
uvrB-uvrA	SAUSA300_0741,SAUSA300_0742	6	4.839	1.55543	0.312523
SAUSA300_1488-SAUSA300_1489	SAUSA300_1488,SAUSA300_1489	0	0.636	0	0.313898
trnaK-trnaQ-trnaY-trnaV-trnaE-trnaN-rrfF	SAUSA300_2116,SAUSA300_2117,SAUSA300_2118,SAUSA300_2119,SAUSA300_2120,SAUSA300_2121,SAUSA300_2122	0	0.631	0	0.315809
yajC-tgt-queA-ruvB-ruvA-thrR-obgE	SAUSA300_1594,SAUSA300_1595,SAUSA300_1596,SAUSA300_1597,SAUSA300_1598,SAUSA300_1599,SAUSA300_1600	7	5.88	1.4934	0.318749
pdhA-pdhB-pdhC-pdhD	SAUSA300_0993,SAUSA300_0994,SAUSA300_0995,SAUSA300_0996	6	4.886	1.54047	0.322499
hsdS2-hsdM2	SAUSA300_1751,SAUSA300_1752	1	2.931	0.427996	0.322885
SAUSA300_0934-SAUSA300_0935-SAUSA300_0936	SAUSA300_0934,SAUSA300_0935,SAUSA300_0936	1	2.925	0.428874	0.324245
pyrP-pyrB-pyrC-carA-carB-pyrF-pyrE-SAUSA300_1099	SAUSA300_1092,SAUSA300_1093,SAUSA300_1094,SAUSA300_1095,SAUSA300_1096,SAUSA300_1097,SAUSA300_1098,SAUSA300_1099	5	9.431	0.665071	0.326442
panD-panC-panB	SAUSA300_2532,SAUSA300_2533,SAUSA300_2534	3	2.02	1.86306	0.328318
rasP-proS	SAUSA300_1155,SAUSA300_1156	1	2.907	0.43153	0.328359
trnaE-trnaN-trnaG-trnaH-trnaF-trnaD-trnaM	SAUSA300_1773,SAUSA300_1774,SAUSA300_1775,SAUSA300_1776,SAUSA300_1777,SAUSA300_1778,SAUSA300_1779	0	0.599	0	0.328402
hutI-hutU	SAUSA300_2277,SAUSA300_2278	1	2.899	0.432721	0.330203
SAUSA300_0595-argS	SAUSA300_0595,SAUSA300_0596	3	2.041	1.84389	0.335668
SAUSA300_0900-trfB-pepF	SAUSA300_0900,SAUSA300_0901,SAUSA300_0902	1	2.841	0.441555	0.343871
SAUSA300_0826-SAUSA300_0827-SAUSA300_0828	SAUSA300_0826,SAUSA300_0827,SAUSA300_0828	4	3.034	1.65387	0.352545
holB-SAUSA300_0462-SAUSA300_0463	SAUSA300_0461,SAUSA300_0462,SAUSA300_0463	3	2.094	1.79722	0.354443
SAUSA300_1698-SAUSA300_1699-SAUSA300_1700	SAUSA300_1698,SAUSA300_1699,SAUSA300_1700	1	2.792	0.449304	0.355836
thiX-thiW-thiV	SAUSA300_0977,SAUSA300_0978,SAUSA300_0979	1	2.789	0.449788	0.356581
lpl9-SAUSA300_0420-SAUSA300_0421-SAUSA300_0422	SAUSA300_0419,SAUSA300_0420,SAUSA300_0421,SAUSA300_0422	1	2.783	0.450757	0.358076
malK-malE-malF-SAUSA300_0211	SAUSA300_0208,SAUSA300_0209,SAUSA300_0210,SAUSA300_0211	2	4.493	0.558405	0.360896
hsdM1-hsdS1	SAUSA300_0405,SAUSA300_0406	1	2.76	0.454514	0.363863
SAUSA300_2352-SAUSA300_2353	SAUSA300_2352,SAUSA300_2353	0	0.517	0	0.363896
SAUSA300_2042-SAUSA300_2043	SAUSA300_2042,SAUSA300_2043	0	0.514	0	0.365292
ispA-xseB-xseA-nusB-SAUSA300_1474-accC-accB	SAUSA300_1470,SAUSA300_1471,SAUSA300_1472,SAUSA300_1473,SAUSA300_1474,SAUSA300_1475,SAUSA300_1476	6	5.081	1.48135	0.365323
mutS-mutL-glpP	SAUSA300_1188,SAUSA300_1189,SAUSA300_1190	6	5.092	1.47815	0.367804
SAUSA300_0804-SAUSA300_0805	SAUSA300_0804,SAUSA300_0805	0	0.507	0	0.368578
fadD-fadE-fadX	SAUSA300_0227,SAUSA300_0228,SAUSA300_0229	2	4.431	0.566219	0.373686
rsgA-cfxE-thiN	SAUSA300_1114,SAUSA300_1115,SAUSA300_1116	3	2.168	1.73587	0.38116
SAUSA300_2496-SAUSA300_2497	SAUSA300_2496,SAUSA300_2497	3	2.175	1.73029	0.383716
sbcD-sbcC	SAUSA300_1242,SAUSA300_1243	5	4.154	1.50994	0.387751
SAUSA300_1332-dynA	SAUSA300_1332,SAUSA300_1333	2	4.338	0.578358	0.393612
SAUSA300_0607-SAUSA300_0608	SAUSA300_0607,SAUSA300_0608	0	0.444	0	0.400115
SAUSA300_0362-SAUSA300_0363-ychF	SAUSA300_0362,SAUSA300_0363,SAUSA300_0364	3	2.223	1.69293	0.401365
feoB-feoA	SAUSA300_2487,SAUSA300_2488	3	2.233	1.68534	0.405068
emrB-SAUSA300_2299	SAUSA300_2298,SAUSA300_2299	1	2.591	0.48416	0.409179
nfo-cshB	SAUSA300_1517,SAUSA300_1518	3	2.246	1.67559	0.409896
SAUSA300_0767-SAUSA300_0768	SAUSA300_0767,SAUSA300_0768	1	0.485	2.58651	0.411594
femA-femB	SAUSA300_1269,SAUSA300_1270	1	2.579	0.486412	0.412592
comEA-SAUSA300_1550-rsfS-SAUSA300_1552-nadD-SAUSA300_1554-aroE-SAUSA300_1556-SAUSA300_1557-mtnN	SAUSA300_1549,SAUSA300_1550,SAUSA300_1551,SAUSA300_1552,SAUSA300_1553,SAUSA300_1554,SAUSA300_1555,SAUSA300_1556,SAUSA300_1557,SAUSA300_1558	7	6.393	1.37357	0.423935
mpsA-mpsB	SAUSA300_0425,SAUSA300_0426	2	4.202	0.597076	0.424411
murE-SAUSA300_0920-prfC	SAUSA300_0919,SAUSA300_0920,SAUSA300_0921	4	3.287	1.52657	0.428692
SAUSA300_1997-SAUSA300_1998	SAUSA300_1997,SAUSA300_1998	2	1.363	1.84073	0.433124
SAUSA300_1523-ccpN	SAUSA300_1523,SAUSA300_1524	2	1.368	1.834	0.435636
asp23-SAUSA300_2143-amaP	SAUSA300_2142,SAUSA300_2143,SAUSA300_2144	2	1.372	1.82866	0.437647
mreD-mreC	SAUSA300_1604,SAUSA300_1605	2	1.372	1.82866	0.437647
nreC-nreB-nreA-narI-narJ-narH-narG	SAUSA300_2337,SAUSA300_2338,SAUSA300_2339,SAUSA300_2340,SAUSA300_2341,SAUSA300_2342,SAUSA300_2343	5	8.682	0.722447	0.440883
SAUSA300_0201-SAUSA300_0202-SAUSA300_0203-ggt	SAUSA300_0201,SAUSA300_0202,SAUSA300_0203,SAUSA300_0204	7	6.483	1.3545	0.443613
SAUSA300_1581-csbD	SAUSA300_1581,SAUSA300_1582	0	0.368	0	0.443667
SAUSA300_2401-SAUSA300_2402	SAUSA300_2401,SAUSA300_2402	1	0.523	2.39858	0.444796
alr-acpS-SAUSA300_2029-SAUSA300_2030-SAUSA300_2031	SAUSA300_2027,SAUSA300_2028,SAUSA300_2029,SAUSA300_2030,SAUSA300_2031	2	4.11	0.610442	0.446401
radA-SAUSA300_0512	SAUSA300_0511,SAUSA300_0512	1	2.462	0.509528	0.447304
nanT-nanA	SAUSA300_0314,SAUSA300_0315	1	2.453	0.511397	0.450085
dltA-dltB-dltC-dltD	SAUSA300_0835,SAUSA300_0836,SAUSA300_0837,SAUSA300_0838	2	4.094	0.612827	0.450323
SAUSA300_2447-SAUSA300_2448	SAUSA300_2447,SAUSA300_2448	1	2.447	0.512651	0.451948
parE-parC	SAUSA300_1250,SAUSA300_1251	5	4.399	1.42584	0.453058
murF-ddl	SAUSA300_2038,SAUSA300_2039	1	2.443	0.513491	0.453194
miaB-SAUSA300_1186-SAUSA300_1187	SAUSA300_1185,SAUSA300_1186,SAUSA300_1187	1	2.428	0.516663	0.457895
lytN-fmhC	SAUSA300_1140,SAUSA300_1141	1	2.423	0.517729	0.459472
phoU-pstB-pstA-pstC	SAUSA300_1279,SAUSA300_1280,SAUSA300_1281,SAUSA300_1282	4	3.391	1.47975	0.461283
lpl3-lpl4-lpl5	SAUSA300_0413,SAUSA300_0414,SAUSA300_0415	1	2.415	0.519444	0.462007
SAUSA300_0350-SAUSA300_0351-SAUSA300_0352-SAUSA300_0353	SAUSA300_0350,SAUSA300_0351,SAUSA300_0352,SAUSA300_0353	1	2.409	0.520738	0.463916
SAUSA300_2616-SAUSA300_2617-SAUSA300_2618-SAUSA300_2619	SAUSA300_2616,SAUSA300_2617,SAUSA300_2618,SAUSA300_2619	2	4.026	0.623178	0.467321
epiG-epiE-epiF-epiP-epiD-epiC-epiB-epiA	SAUSA300_1760,SAUSA300_1761,SAUSA300_1762,SAUSA300_1763,SAUSA300_1764,SAUSA300_1765,SAUSA300_1766,SAUSA300_1767	5	8.523	0.735925	0.468756
rumA-dgkB	SAUSA300_1878,SAUSA300_1879	1	2.389	0.525097	0.470334
crtN-crtM-crtQ-crtP-crtO	SAUSA300_2498,SAUSA300_2499,SAUSA300_2500,SAUSA300_2501,SAUSA300_2502	6	5.527	1.36181	0.470917
comFA-comFC-saHPF	SAUSA300_0734,SAUSA300_0735,SAUSA300_0736	1	2.382	0.52664	0.472599
SAUSA300_2519-SAUSA300_2520-SAUSA300_2521	SAUSA300_2519,SAUSA300_2520,SAUSA300_2521	4	3.428	1.46378	0.473031
sufC-sufD-sufS-sufU-sufB	SAUSA300_0818,SAUSA300_0819,SAUSA300_0820,SAUSA300_0821,SAUSA300_0822	3	5.524	0.681277	0.476873
SAUSA300_1561-pxpA-SAUSA300_1563-SAUSA300_1564-SAUSA300_1565-SAUSA300_1566	SAUSA300_1561,SAUSA300_1562,SAUSA300_1563,SAUSA300_1564,SAUSA300_1565,SAUSA300_1566	3	5.521	0.681647	0.47754
nasF-nasE-nasD-nirR	SAUSA300_2344,SAUSA300_2345,SAUSA300_2346,SAUSA300_2347	5	4.488	1.39757	0.477572
pdxS-pdxT	SAUSA300_0504,SAUSA300_0505	2	1.451	1.72909	0.477589
phoR-phoP	SAUSA300_1638,SAUSA300_1639	1	2.365	0.530426	0.478144
SAUSA300_0591-SAUSA300_0592-SAUSA300_0593	SAUSA300_0591,SAUSA300_0592,SAUSA300_0593	1	2.36	0.53155	0.479787
qoxD-qoxC-qoxB-qoxA	SAUSA300_0960,SAUSA300_0961,SAUSA300_0962,SAUSA300_0963	2	3.97	0.631969	0.481724
fruC-scrB	SAUSA300_1993,SAUSA300_1994	3	2.44	1.54237	0.483477
ctsR-mcsA-mcsB-clpC	SAUSA300_0507,SAUSA300_0508,SAUSA300_0509,SAUSA300_0510	5	4.513	1.38983	0.484525
rplY-pth-mfd-SAUSA300_0482-SAUSA300_0483-SAUSA300_0484-divIC	SAUSA300_0479,SAUSA300_0480,SAUSA300_0481,SAUSA300_0482,SAUSA300_0483,SAUSA300_0484,SAUSA300_0485	5	8.421	0.744839	0.487322
pabA-pabB-SAUSA300_0700	SAUSA300_0698,SAUSA300_0699,SAUSA300_0700	1	2.336	0.537011	0.487745
adk-secY-rplO-rpmD-rpsE-rplR-rplF-rpsH-rpsN-rplE-rplX-rplN-rpsQ-rpmC-rplP-rpsC-rplV-rpsS-rplB-rplW-rplD-rplC-rpsJ	SAUSA300_2183,SAUSA300_2184,SAUSA300_2185,SAUSA300_2186,SAUSA300_2187,SAUSA300_2188,SAUSA300_2189,SAUSA300_2190,SAUSA300_2191,SAUSA300_2192,SAUSA300_2193,SAUSA300_2194,SAUSA300_2195,SAUSA300_2196,SAUSA300_2197,SAUSA300_2198,SAUSA300_2199,SAUSA300_2200,SAUSA300_2201,SAUSA300_2202,SAUSA300_2203,SAUSA300_2204,SAUSA300_2205	11	11.154	1.23714	0.493668
gcvPB-gcvPA-gcvT	SAUSA300_1496,SAUSA300_1497,SAUSA300_1498	2	3.922	0.639703	0.494365
SAUSA300_0458-tmk-pstA	SAUSA300_0458,SAUSA300_0459,SAUSA300_0460	1	2.313	0.542351	0.495486
mhqE-mhqD	SAUSA300_2457,SAUSA300_2458	2	1.487	1.68723	0.495906
SAUSA300_0998-potA-potB-potC-potD-SAUSA300_1003	SAUSA300_0998,SAUSA300_0999,SAUSA300_1000,SAUSA300_1001,SAUSA300_1002,SAUSA300_1003	3	5.417	0.694734	0.501117
SAUSA300_2374-SAUSA300_2375	SAUSA300_2374,SAUSA300_2375	4	3.521	1.42512	0.50288
nadE-pncB	SAUSA300_1893,SAUSA300_1894	1	2.283	0.549478	0.505757
pmtD-pmtC-pmtB-pmtA-pmtR	SAUSA300_1910,SAUSA300_1911,SAUSA300_1912,SAUSA300_1913,SAUSA300_1914	4	3.563	1.40832	0.516497
SAUSA300_0842-sufA	SAUSA300_0842,SAUSA300_0843	1	0.608	2.06325	0.517865
SAUSA300_2512-SAUSA300_2513-SAUSA300_2514	SAUSA300_2512,SAUSA300_2513,SAUSA300_2514	2	1.534	1.63554	0.519898
pncA-ppaC	SAUSA300_1899,SAUSA300_1900	2	1.542	1.62705	0.523989
ssl13-ssl14	SAUSA300_1060,SAUSA300_1061	2	1.545	1.62389	0.525523
metN1-metP1-metQ1	SAUSA300_0796,SAUSA300_0797,SAUSA300_0798	3	2.552	1.47468	0.527018
tcyC-tcyB-tcyA	SAUSA300_2357,SAUSA300_2358,SAUSA300_2359	1	2.207	0.568399	0.532669
rplQ-rpoA-rpsK-rpsM-rpmJ-infA	SAUSA300_2177,SAUSA300_2178,SAUSA300_2179,SAUSA300_2180,SAUSA300_2181,SAUSA300_2182	3	2.568	1.46549	0.533286
SAUSA300_0105-norC	SAUSA300_0105,SAUSA300_0106	3	2.568	1.46549	0.533286
hepT-ubiE	SAUSA300_1359,SAUSA300_1360	2	1.563	1.60519	0.534735
fabH-fabF	SAUSA300_0885,SAUSA300_0886	1	2.197	0.570987	0.536308
nhaC-SAUSA300_2251	SAUSA300_2250,SAUSA300_2251	3	2.577	1.46037	0.536817
SAUSA300_1081-SAUSA300_1082-sepF-SAUSA300_1084-SAUSA300_1085-SAUSA300_1086	SAUSA300_1081,SAUSA300_1082,SAUSA300_1083,SAUSA300_1084,SAUSA300_1085,SAUSA300_1086	2	3.749	0.669222	0.542248
hprK-lgt-SAUSA300_0745-SAUSA300_0746-trxB	SAUSA300_0743,SAUSA300_0744,SAUSA300_0745,SAUSA300_0746,SAUSA300_0747	5	4.719	1.32916	0.542807
glnQ-SAUSA300_1808	SAUSA300_1807,SAUSA300_1808	1	2.172	0.577559	0.545506
gnd-SAUSA300_1460	SAUSA300_1459,SAUSA300_1460	3	2.607	1.44356	0.548608
SAUSA300_1010-SAUSA300_1011	SAUSA300_1010,SAUSA300_1011	1	0.651	1.92697	0.554113
xerC-clpQ-hslU-codY	SAUSA300_1145,SAUSA300_1146,SAUSA300_1147,SAUSA300_1148	2	3.705	0.67717	0.555019
htrA2-ktrD	SAUSA300_0923,SAUSA300_0924	2	3.684	0.68103	0.5612
sdaAA-sdaAB-SAUSA300_2471	SAUSA300_2469,SAUSA300_2470,SAUSA300_2471	3	2.639	1.42606	0.561221
SAUSA300_1572-SAUSA300_1573-SAUSA300_1574-alaS	SAUSA300_1572,SAUSA300_1573,SAUSA300_1574,SAUSA300_1575	4	3.708	1.35324	0.564064
SAUSA300_1194-miaA-hfq	SAUSA300_1194,SAUSA300_1195,SAUSA300_1196	1	2.115	0.593124	0.567025
rrfC-trnaA	SAUSA300_0497,SAUSA300_0498	0	0.202	0	0.570367
galE-SAUSA300_0131	SAUSA300_0130,SAUSA300_0131	2	1.635	1.5345	0.571631
fruR-fruB-fruA	SAUSA300_0683,SAUSA300_0684,SAUSA300_0685	2	3.642	0.688884	0.573731
sucC-sucD	SAUSA300_1138,SAUSA300_1139	1	2.096	0.598501	0.574371
lukG-lukH	SAUSA300_1974,SAUSA300_1975	1	2.093	0.599359	0.575539
trnaL-SAUSA300_1812	SAUSA300_1811,SAUSA300_1812	0	0.196	0	0.576149
malA-malR	SAUSA300_1456,SAUSA300_1457	3	2.684	1.40215	0.579012
spoIIIE-SAUSA300_1170-SAUSA300_1171-SAUSA300_1172-SAUSA300_1173-SAUSA300_1174-SAUSA300_1175-pgsA	SAUSA300_1169,SAUSA300_1170,SAUSA300_1171,SAUSA300_1172,SAUSA300_1173,SAUSA300_1174,SAUSA300_1175,SAUSA300_1176	8	8.202	1.22356	0.5797
SAUSA300_2575-manP-pmi	SAUSA300_2575,SAUSA300_2576,SAUSA300_2577	5	4.855	1.29192	0.582107
fepA-fepB-fepC	SAUSA300_0344,SAUSA300_0345,SAUSA300_0346	4	3.773	1.32993	0.585623
pykA-pfkA	SAUSA300_1644,SAUSA300_1645	3	2.702	1.39281	0.586144
gltB-gltD	SAUSA300_0445,SAUSA300_0446	6	5.98	1.25865	0.586499
cbf1-SAUSA300_1792-SAUSA300_1793	SAUSA300_1791,SAUSA300_1792,SAUSA300_1793	3	5.06	0.74375	0.589027
ureA-ureB-ureC-ureE-ureF-ureG-ureD	SAUSA300_2238,SAUSA300_2239,SAUSA300_2240,SAUSA300_2241,SAUSA300_2242,SAUSA300_2243,SAUSA300_2244	3	5.048	0.745518	0.592173
gatD-murT	SAUSA300_1872,SAUSA300_1873	1	2.046	0.613127	0.594124
trnaG-trnaL	SAUSA300_2018,SAUSA300_2019	0	0.178	0	0.59422
SAUSA300_0132-SAUSA300_0133-SAUSA300_0134	SAUSA300_0132,SAUSA300_0133,SAUSA300_0134	4	3.805	1.31875	0.596281
mccA-mccB	SAUSA300_0433,SAUSA300_0434	1	2.04	0.61493	0.596536
rplGB-rpsL-rpsG-fusA-tuf	SAUSA300_0529,SAUSA300_0530,SAUSA300_0531,SAUSA300_0532,SAUSA300_0533	5	4.907	1.27823	0.597273
SAUSA300_2168-SAUSA300_2169-SAUSA300_2170	SAUSA300_2168,SAUSA300_2169,SAUSA300_2170	2	3.563	0.704158	0.597914
dinG-birA-papS-bshA	SAUSA300_1346,SAUSA300_1347,SAUSA300_1348,SAUSA300_1349	6	6.024	1.24946	0.598048
splF-splE-splD-splC-splB-splA	SAUSA300_1753,SAUSA300_1754,SAUSA300_1755,SAUSA300_1756,SAUSA300_1757,SAUSA300_1758	5	4.915	1.27615	0.599613
phnE1-phnE2-phnC-phnD	SAUSA300_0142,SAUSA300_0143,SAUSA300_0144,SAUSA300_0145	2	3.557	0.705346	0.599784
fni-corA	SAUSA300_2292,SAUSA300_2293	1	2.027	0.618874	0.601792
SAUSA300_1839-SAUSA300_1840	SAUSA300_1839,SAUSA300_1840	0	0.17	0	0.602631
nagB-hxlA-hxlB	SAUSA300_0554,SAUSA300_0555,SAUSA300_0556	1	2.017	0.621942	0.605865
trnaS-trnaN	SAUSA300_0926,SAUSA300_0927	0	0.165	0	0.608017
ssuB-ssuA-ssuC-SAUSA300_0177	SAUSA300_0174,SAUSA300_0175,SAUSA300_0176,SAUSA300_0177	2	3.53	0.710741	0.608256
SAUSA300_0846-SAUSA300_0847	SAUSA300_0846,SAUSA300_0847	2	1.709	1.46806	0.609565
opuCD-opuCC-opuCB-opuCA	SAUSA300_2390,SAUSA300_2391,SAUSA300_2392,SAUSA300_2393	2	3.511	0.714587	0.614274
hrtA-htrB	SAUSA300_2306,SAUSA300_2307	2	1.72	1.45867	0.615199
SAUSA300_0576-SAUSA300_0577	SAUSA300_0576,SAUSA300_0577	2	1.725	1.45444	0.61776
ptsH-ptsI	SAUSA300_0983,SAUSA300_0984	1	1.987	0.631332	0.618234
lacG-lacE-lacF-lacD-lacC-lacB-lacA	SAUSA300_2149,SAUSA300_2150,SAUSA300_2151,SAUSA300_2152,SAUSA300_2153,SAUSA300_2154,SAUSA300_2155	4	6.369	0.787852	0.618733
dapI-alr2-lysA	SAUSA300_1291,SAUSA300_1292,SAUSA300_1293	2	3.496	0.717653	0.619059
trnaE-trnaD	SAUSA300_0018,SAUSA300_0019	0	0.154	0	0.62024
SAUSA300_1906-SAUSA300_1907-SAUSA300_1908	SAUSA300_1906,SAUSA300_1907,SAUSA300_1908	1	1.98	0.633564	0.621154
SAUSA300_1851-SAUSA300_1852-SAUSA300_1853-recX	SAUSA300_1851,SAUSA300_1852,SAUSA300_1853,SAUSA300_1854	2	3.487	0.719505	0.621945
SAUSA300_0957-SAUSA300_0958	SAUSA300_0957,SAUSA300_0958	2	1.735	1.44606	0.622879
SAUSA300_1215-cls1	SAUSA300_1215,SAUSA300_1216	2	1.736	1.44523	0.623391
SAUSA300_0308-SAUSA300_0309	SAUSA300_0308,SAUSA300_0309	2	1.739	1.44273	0.624926
fadA-fadB	SAUSA300_0225,SAUSA300_0226	2	3.475	0.72199	0.625808
SAUSA300_1607-radC-comC	SAUSA300_1607,SAUSA300_1608,SAUSA300_1609	2	1.742	1.44025	0.626461
vraD-vraE-SAUSA300_2635-SAUSA300_2636	SAUSA300_2633,SAUSA300_2634,SAUSA300_2635,SAUSA300_2636	2	3.46	0.72512	0.630664
perR-SAUSA300_1843-SAUSA300_1844	SAUSA300_1842,SAUSA300_1843,SAUSA300_1844	1	1.954	0.641995	0.632108
airR-airS	SAUSA300_1798,SAUSA300_1799	2	1.757	1.42795	0.634134
SAUSA300_1891-SAUSA300_1892	SAUSA300_1891,SAUSA300_1892	1	0.756	1.65934	0.640358
folE2-bshB2-SAUSA300_0553	SAUSA300_0551,SAUSA300_0552,SAUSA300_0553	1	1.932	0.649305	0.641515
hlgC-hlgB	SAUSA300_2366,SAUSA300_2367	1	1.926	0.651328	0.644102
SAUSA300_0238-SAUSA300_0239-SAUSA300_0240	SAUSA300_0238,SAUSA300_0239,SAUSA300_0240	3	2.849	1.32095	0.644618
tarI'-tarJ'-tarL'	SAUSA300_0245,SAUSA300_0246,SAUSA300_0247	2	3.408	0.736184	0.647729
rnjA-rpoY	SAUSA300_0989,SAUSA300_0990	1	1.915	0.655069	0.648871
SAUSA300_0879-SAUSA300_0880-SAUSA300_0881-SAUSA300_0882	SAUSA300_0879,SAUSA300_0880,SAUSA300_0881,SAUSA300_0882	2	3.38	0.742283	0.657067
murI-SAUSA300_1050-SAUSA300_1051	SAUSA300_1049,SAUSA300_1050,SAUSA300_1051	1	1.895	0.661983	0.657623
acuA-acuC	SAUSA300_1680,SAUSA300_1681	2	1.826	1.374	0.669345
SAUSA300_1321-cvfC-SAUSA300_1323	SAUSA300_1321,SAUSA300_1322,SAUSA300_1323	1	1.866	0.672271	0.670505
SAUSA300_2474-SAUSA300_2475	SAUSA300_2474,SAUSA300_2475	1	0.796	1.57595	0.672311
hemL-hemB-hemD-hemC-hemX-hemA	SAUSA300_1614,SAUSA300_1615,SAUSA300_1616,SAUSA300_1617,SAUSA300_1618,SAUSA300_1619	4	6.152	0.815642	0.672488
SAUSA300_2377-SAUSA300_2378	SAUSA300_2377,SAUSA300_2378	1	1.861	0.674077	0.672749
SAUSA300_1366-cmk	SAUSA300_1366,SAUSA300_1367	1	0.806	1.5564	0.680219
tilS-hprT	SAUSA300_0487,SAUSA300_0488	1	1.839	0.682141	0.682704
SAUSA300_1026-rpmF	SAUSA300_1026,SAUSA300_1027	1	0.81	1.54871	0.683373
rpsB-tsf	SAUSA300_1149,SAUSA300_1150	1	1.83	0.685496	0.686815
eutD-lipL	SAUSA300_0570,SAUSA300_0571	1	1.825	0.687374	0.689108
moaA-mobA-moaD-moaE-mobB-moeA	SAUSA300_2219,SAUSA300_2220,SAUSA300_2221,SAUSA300_2222,SAUSA300_2223,SAUSA300_2224	4	4.088	1.22745	0.691399
opp-2F-opp-2D-opp-2C-opp-2B	SAUSA300_1273,SAUSA300_1274,SAUSA300_1275,SAUSA300_1276	2	3.263	0.768898	0.69722
mepR-mepA	SAUSA300_0334,SAUSA300_0335	2	1.881	1.33382	0.697284
SAUSA300_0464-SAUSA300_0465-rsmI	SAUSA300_0464,SAUSA300_0465,SAUSA300_0466	1	1.807	0.694221	0.697422
SAUSA300_2431-SAUSA300_2432	SAUSA300_2431,SAUSA300_2432	2	3.255	0.770788	0.700033
accA-accD	SAUSA300_1646,SAUSA300_1647	1	1.801	0.696534	0.700214
mtlF-mtlR-mtlA-mtlD	SAUSA300_2105,SAUSA300_2106,SAUSA300_2107,SAUSA300_2108	5	5.257	1.19313	0.700748
SAUSA300_0311-psuG-SAUSA300_0313	SAUSA300_0311,SAUSA300_0312,SAUSA300_0313	2	3.247	0.772687	0.702855
sdhC-sdhA-sdhB	SAUSA300_1046,SAUSA300_1047,SAUSA300_1048	2	3.247	0.772687	0.702855
SAUSA300_2556-SAUSA300_2557-nsaS-nsaR-SAUSA300_2560	SAUSA300_2556,SAUSA300_2557,SAUSA300_2558,SAUSA300_2559,SAUSA300_2560	3	4.649	0.809502	0.703958
sirC-sirB-sirA	SAUSA300_0115,SAUSA300_0116,SAUSA300_0117	3	2.998	1.25529	0.70404
gmk-rpoZ	SAUSA300_1102,SAUSA300_1103	1	0.841	1.49163	0.707638
icaB-icaC	SAUSA300_2601,SAUSA300_2602	2	1.911	1.31288	0.712463
SAUSA300_0003-recF-gyrB-gyrA	SAUSA300_0003,SAUSA300_0004,SAUSA300_0005,SAUSA300_0006	4	5.998	0.836584	0.712484
SAUSA300_0938-tarM	SAUSA300_0938,SAUSA300_0939	1	1.774	0.707135	0.7129
rpsI-rplM	SAUSA300_2171,SAUSA300_2172	1	0.849	1.47757	0.713848
lysC-asd-dapA-dapB-dapD	SAUSA300_1286,SAUSA300_1287,SAUSA300_1288,SAUSA300_1289,SAUSA300_1290	3	4.612	0.815996	0.71503
bioX-bioW-bioF-bioB-bioA-bioD	SAUSA300_2368,SAUSA300_2369,SAUSA300_2370,SAUSA300_2371,SAUSA300_2372,SAUSA300_2373	5	5.305	1.18234	0.715059
gbaA-gbaB-SAUSA300_2517-SAUSA300_2518	SAUSA300_2515,SAUSA300_2516,SAUSA300_2517,SAUSA300_2518	2	3.212	0.781107	0.7153
SAUSA300_0981-SAUSA300_0982	SAUSA300_0981,SAUSA300_0982	1	1.768	0.709535	0.715747
lukD-lukE	SAUSA300_1768,SAUSA300_1769	2	1.92	1.30673	0.717007
atpC-atpD-atpG-atpA-atpH-atpF	SAUSA300_2057,SAUSA300_2058,SAUSA300_2059,SAUSA300_2060,SAUSA300_2061,SAUSA300_2062	5	5.345	1.17349	0.726995
SAUSA300_0440-SAUSA300_0441	SAUSA300_0440,SAUSA300_0441	1	0.87	1.44191	0.730049
SAUSA300_0212-SAUSA300_0213-SAUSA300_0214	SAUSA300_0212,SAUSA300_0213,SAUSA300_0214	2	3.164	0.792957	0.732637
capA-capB-capC-capD-capE-capF-capG-capH-capI-capJ-capK-capL-capM-capN-capO-capP	SAUSA300_0152,SAUSA300_0153,SAUSA300_0154,SAUSA300_0155,SAUSA300_0156,SAUSA300_0157,SAUSA300_0158,SAUSA300_0159,SAUSA300_0160,SAUSA300_0161,SAUSA300_0162,SAUSA300_0163,SAUSA300_0164,SAUSA300_0165,SAUSA300_0166,SAUSA300_0167	12	16.569	0.908533	0.73416
SAUSA300_0295-SAUSA300_0296	SAUSA300_0295,SAUSA300_0296	1	0.888	1.41268	0.743817
SAUSA300_1483-SAUSA300_1484-SAUSA300_1485-SAUSA300_1486	SAUSA300_1483,SAUSA300_1484,SAUSA300_1485,SAUSA300_1486	4	4.245	1.18206	0.74446
SAUSA300_0659-SAUSA300_0660	SAUSA300_0659,SAUSA300_0660	1	1.705	0.735752	0.746266
glmM-SAUSA300_2112-dacA	SAUSA300_2111,SAUSA300_2112,SAUSA300_2113	2	3.125	0.802853	0.746953
SAUSA300_0701-SAUSA300_0702	SAUSA300_0701,SAUSA300_0702	1	1.698	0.738785	0.749727
SAUSA300_2246-sarY-SAUSA300_2248	SAUSA300_2246,SAUSA300_2247,SAUSA300_2248	2	3.114	0.805689	0.751028
dprA-topA	SAUSA300_1142,SAUSA300_1143	3	3.121	1.20582	0.752962
rluB-scpB-scpA	SAUSA300_1443,SAUSA300_1444,SAUSA300_1445	2	1.996	1.25697	0.755192
SAUSA300_1314-crr-msrB-msrA1	SAUSA300_1314,SAUSA300_1315,SAUSA300_1316,SAUSA300_1317	1	1.687	0.743603	0.755196
SAUSA300_0146-SAUSA300_0147	SAUSA300_0146,SAUSA300_0147	3	3.13	1.20236	0.756532
SAUSA300_1342-nth-dnaD	SAUSA300_1342,SAUSA300_1343,SAUSA300_1344	1	1.681	0.746257	0.758195
argB-argJ-argC-argD	SAUSA300_0184,SAUSA300_0185,SAUSA300_0186,SAUSA300_0187	4	4.287	1.17048	0.758646
arlS-arlR	SAUSA300_1307,SAUSA300_1308	2	2.011	1.2476	0.762685
kdpC-kdpB-kdpA	SAUSA300_2032,SAUSA300_2033,SAUSA300_2034	4	4.302	1.16639	0.763709
SAUSA300_0453-recR	SAUSA300_0453,SAUSA300_0454	1	0.92	1.36354	0.768024
SAUSA300_0579-SAUSA300_0580	SAUSA300_0579,SAUSA300_0580	2	2.039	1.23046	0.776629
hssR-hssS	SAUSA300_2308,SAUSA300_2309	2	2.04	1.22986	0.777126
aspS-hisS	SAUSA300_1586,SAUSA300_1587	2	3.044	0.824216	0.777344
SAUSA300_2334-SAUSA300_2335-SAUSA300_2336	SAUSA300_2334,SAUSA300_2335,SAUSA300_2336	1	1.633	0.768192	0.782564
arsR-arsB-arsC	SAUSA300_1717,SAUSA300_1718,SAUSA300_1719	2	2.052	1.22267	0.783083
pflB-pflA	SAUSA300_0220,SAUSA300_0221	2	3.027	0.828845	0.783836
SAUSA300_2522-SAUSA300_2523-SAUSA300_2524	SAUSA300_2522,SAUSA300_2523,SAUSA300_2524	1	0.945	1.32747	0.786694
fapR-plsX-fabD-fabG	SAUSA300_1121,SAUSA300_1122,SAUSA300_1123,SAUSA300_1124	3	3.209	1.17276	0.787782
lpl7-lpl8	SAUSA300_0417,SAUSA300_0418	1	1.619	0.774835	0.789802
modC-modB-modA	SAUSA300_2228,SAUSA300_2229,SAUSA300_2230	2	2.073	1.21028	0.793483
SAUSA300_1859-ampS-SAUSA300_1861	SAUSA300_1859,SAUSA300_1860,SAUSA300_1861	2	2.079	1.20679	0.796448
htsC-htsB-htsA	SAUSA300_2134,SAUSA300_2135,SAUSA300_2136	2	2.991	0.838821	0.797711
SAUSA300_0271-SAUSA300_0272-SAUSA300_0273-SAUSA300_0274	SAUSA300_0271,SAUSA300_0272,SAUSA300_0273,SAUSA300_0274	3	4.347	0.86574	0.797774
opp-4A-opp-4D-opp-4F-opp-4B-opp-4C	SAUSA300_0892,SAUSA300_0893,SAUSA300_0894,SAUSA300_0895,SAUSA300_0896	5	5.583	1.12346	0.798046
rimP-nusA-SAUSA300_1160-SAUSA300_1161-infB	SAUSA300_1158,SAUSA300_1159,SAUSA300_1160,SAUSA300_1161,SAUSA300_1162	4	4.404	1.13938	0.798085
dsbA-SAUSA300_2355	SAUSA300_2354,SAUSA300_2355	1	0.965	1.29996	0.801475
SAUSA300_0321-SAUSA300_0322	SAUSA300_0321,SAUSA300_0322	2	2.099	1.19529	0.80631
ahpF-ahpC	SAUSA300_0379,SAUSA300_0380	2	2.108	1.19019	0.810738
SAUSA300_0748-SAUSA300_0749-whiA	SAUSA300_0748,SAUSA300_0749,SAUSA300_0750	2	2.957	0.848466	0.810976
msrA3-SAUSA300_2595	SAUSA300_2594,SAUSA300_2595	1	0.979	1.28137	0.811741
hptR-hptS-hptA	SAUSA300_0217,SAUSA300_0218,SAUSA300_0219	3	3.272	1.15017	0.812578
atpE-atpB	SAUSA300_2063,SAUSA300_2064	1	0.983	1.27615	0.814662
mupG-murQ-murP-murR	SAUSA300_0192,SAUSA300_0193,SAUSA300_0194,SAUSA300_0195	3	4.295	0.876222	0.814708
SAUSA300_2287-SAUSA300_2288	SAUSA300_2287,SAUSA300_2288	2	2.124	1.18122	0.818592
cap1C-cap1B-cap1A	SAUSA300_2596,SAUSA300_2597,SAUSA300_2598	2	2.135	1.17514	0.82398
ribH-ribA-ribB-ribD	SAUSA300_1712,SAUSA300_1713,SAUSA300_1714,SAUSA300_1715	3	3.312	1.13628	0.828254
moaB-moeB	SAUSA300_2226,SAUSA300_2227	1	1.541	0.814054	0.831219
opp-3B-opp-3C-opp-3D-opp-3F-opp-3A	SAUSA300_0887,SAUSA300_0888,SAUSA300_0889,SAUSA300_0890,SAUSA300_0891	5	5.7	1.1004	0.832878
glpK-glpD	SAUSA300_1192,SAUSA300_1193	3	3.327	1.13116	0.834118
SAUSA300_0010-SAUSA300_0011	SAUSA300_0010,SAUSA300_0011	1	1.021	1.22866	0.842133
kdpD-kdpE	SAUSA300_2035,SAUSA300_2036	3	3.352	1.12272	0.843871
SAUSA300_1706-SAUSA300_1707	SAUSA300_1706,SAUSA300_1707	1	1.513	0.829119	0.846546
SAUSA300_0197-SAUSA300_0198-SAUSA300_0199	SAUSA300_0197,SAUSA300_0198,SAUSA300_0199	2	2.866	0.875406	0.847243
cidC-cidB-cidA	SAUSA300_2477,SAUSA300_2478,SAUSA300_2479	2	2.863	0.876324	0.848457
fhuC-fhuB-fhuG	SAUSA300_0633,SAUSA300_0634,SAUSA300_0635	2	2.85	0.880321	0.853734
SAUSA300_0832-nagD-SAUSA300_0834	SAUSA300_0832,SAUSA300_0833,SAUSA300_0834	2	2.205	1.13783	0.858013
coaE-mutM-polA	SAUSA300_1634,SAUSA300_1635,SAUSA300_1636	3	4.157	0.90531	0.860724
SAUSA300_1018-SAUSA300_1019	SAUSA300_1018,SAUSA300_1019	1	1.487	0.843616	0.860999
murC-ftsK-SAUSA300_1688-SAUSA300_1689-SAUSA300_1690-SAUSA300_1691	SAUSA300_1686,SAUSA300_1687,SAUSA300_1688,SAUSA300_1689,SAUSA300_1690,SAUSA300_1691	7	8.216	1.06879	0.86139
SAUSA300_2318-iruO	SAUSA300_2318,SAUSA300_2319	1	1.471	0.852792	0.869999
hom-thrC-thrB-SAUSA300_1229	SAUSA300_1226,SAUSA300_1227,SAUSA300_1228,SAUSA300_1229	3	4.124	0.912554	0.871954
cls2-SAUSA300_2045	SAUSA300_2044,SAUSA300_2045	2	2.234	1.12306	0.871979
SAUSA300_2453-SAUSA300_2454	SAUSA300_2453,SAUSA300_2454	1	1.467	0.855118	0.872262
SAUSA300_2257-fdhA	SAUSA300_2257,SAUSA300_2258	3	3.427	1.09815	0.872977
ackA-SAUSA300_1658	SAUSA300_1657,SAUSA300_1658	2	2.237	1.12155	0.873419
dnaI-dnaB-nrdR	SAUSA300_1630,SAUSA300_1631,SAUSA300_1632	2	2.791	0.89893	0.877963
SAUSA300_0544-azo1	SAUSA300_0544,SAUSA300_0545	1	1.456	0.861578	0.878511
SAUSA300_0324-gcvH-L-SAUSA300_0326-sirTM-lplA2	SAUSA300_0324,SAUSA300_0325,SAUSA300_0326,SAUSA300_0327,SAUSA300_0328	3	4.102	0.917448	0.879489
metS-SAUSA300_0468	SAUSA300_0467,SAUSA300_0468	2	2.777	0.903462	0.883779
mdh-metE-metF-metC-metI	SAUSA300_0356,SAUSA300_0357,SAUSA300_0358,SAUSA300_0359,SAUSA300_0360	6	7.09	1.0616	0.884437
SAUSA300_0429-SAUSA300_0430	SAUSA300_0429,SAUSA300_0430	1	1.445	0.868137	0.884799
rnmV-ksgA	SAUSA300_0469,SAUSA300_0470	1	1.44	0.871151	0.88767
gtfB-gtfA-secA2-asp3-asp2-asp1-secY2	SAUSA300_2582,SAUSA300_2583,SAUSA300_2584,SAUSA300_2585,SAUSA300_2586,SAUSA300_2587,SAUSA300_2588	8	10.527	0.953326	0.891207
SAUSA300_1462-SAUSA300_1463	SAUSA300_1462,SAUSA300_1463	1	1.431	0.87663	0.892858
SAUSA300_0906-relQ-ppnK-SAUSA300_0909-mgtE-cpaA	SAUSA300_0906,SAUSA300_0907,SAUSA300_0908,SAUSA300_0909,SAUSA300_0910,SAUSA300_0911	5	5.936	1.05665	0.902616
SAUSA300_1770-SAUSA300_1771	SAUSA300_1770,SAUSA300_1771	1	1.109	1.13116	0.903839
sfnaC-sfnaB-sfnaA	SAUSA300_2137,SAUSA300_2138,SAUSA300_2139	3	4.014	0.937562	0.91
mraZ-mraW-ftsL-pbp1	SAUSA300_1072,SAUSA300_1073,SAUSA300_1074,SAUSA300_1075	3	4.012	0.938029	0.9107
recQ2-SAUSA300_1372	SAUSA300_1371,SAUSA300_1372	2	2.322	1.0805	0.913848
mtaB-rsmE-prmA-dnaJ-dnaK-grpE-hrcA	SAUSA300_1536,SAUSA300_1537,SAUSA300_1538,SAUSA300_1539,SAUSA300_1540,SAUSA300_1541,SAUSA300_1542	6	7.86	0.957601	0.914643
SAUSA300_0241-SAUSA300_0242-SAUSA300_0243-SAUSA300_0244	SAUSA300_0241,SAUSA300_0242,SAUSA300_0243,SAUSA300_0244	3	3.547	1.061	0.919005
queF-SAUSA300_0714	SAUSA300_0713,SAUSA300_0714	1	1.386	0.905092	0.919192
SAUSA300_1301-SAUSA300_1302	SAUSA300_1301,SAUSA300_1302	2	2.691	0.932336	0.920069
galM-SAUSA300_2286	SAUSA300_2285,SAUSA300_2286	1	1.375	0.912333	0.92573
SAUSA300_2465-SAUSA300_2466	SAUSA300_2465,SAUSA300_2466	1	1.372	0.914328	0.92752
SAUSA300_0013-gdpP-rplI-dnaC	SAUSA300_0013,SAUSA300_0014,SAUSA300_0015,SAUSA300_0016	4	4.795	1.04647	0.928034
sspC-sspB-sspA	SAUSA300_0949,SAUSA300_0950,SAUSA300_0951	2	2.64	0.950347	0.94204
nrdG-nrdD	SAUSA300_2550,SAUSA300_2551	2	2.383	1.05284	0.942395
isdC-isdD-isdE-isdF	SAUSA300_1030,SAUSA300_1031,SAUSA300_1032,SAUSA300_1033	3	3.612	1.04191	0.943625
SAUSA300_0233-hmp	SAUSA300_0233,SAUSA300_0234	1	1.344	0.933376	0.944368
xpt-pbuX-guaB-guaA	SAUSA300_0386,SAUSA300_0387,SAUSA300_0388,SAUSA300_0389	4	4.916	1.02071	0.967347
citC-citZ	SAUSA300_1640,SAUSA300_1641	2	2.438	1.02909	0.967782
noc-gidB-gidA-trmE	SAUSA300_2643,SAUSA300_2644,SAUSA300_2645,SAUSA300_2646	4	4.924	1.01906	0.969927
mraY-murD-divIB-ftsA-ftsZ	SAUSA300_1076,SAUSA300_1077,SAUSA300_1078,SAUSA300_1079,SAUSA300_1080	5	6.374	0.984043	0.971166
zapA-SAUSA300_1041-polX-mutS2	SAUSA300_1040,SAUSA300_1041,SAUSA300_1042,SAUSA300_1043	4	4.931	1.01761	0.972183
SAUSA300_2129-SAUSA300_2130-SAUSA300_2131	SAUSA300_2129,SAUSA300_2130,SAUSA300_2131	2	2.448	1.02488	0.97236
metN2-metP2-metQ2	SAUSA300_0435,SAUSA300_0436,SAUSA300_0437	2	2.567	0.977372	0.974057
srrB-srrA	SAUSA300_1441,SAUSA300_1442	2	2.457	1.02113	0.976471
lpl1-SAUSA300_0411-SAUSA300_0412	SAUSA300_0410,SAUSA300_0411,SAUSA300_0412	2	2.46	1.01988	0.97784
sstA-sstB-sstC-sstD	SAUSA300_0718,SAUSA300_0719,SAUSA300_0720,SAUSA300_0721	3	3.819	0.985434	0.979648
SAUSA300_0674-SAUSA300_0675	SAUSA300_0674,SAUSA300_0675	1	1.23	1.01988	0.984336
SAUSA300_1733-rppH	SAUSA300_1733,SAUSA300_1734	1	1.23	1.01988	0.984336
trpE-trpG-trpD-trpC-trpF-trpB-trpA	SAUSA300_1262,SAUSA300_1263,SAUSA300_1264,SAUSA300_1265,SAUSA300_1266,SAUSA300_1267,SAUSA300_1268	5	6.317	0.992922	0.987284
SAUSA300_0586-SAUSA300_0587	SAUSA300_0586,SAUSA300_0587	1	1.241	1.01084	0.991406
gpsB-SAUSA300_1338-SAUSA300_1339	SAUSA300_1337,SAUSA300_1338,SAUSA300_1339	1	1.264	0.992451	0.993943
mntC-mntB-mntA	SAUSA300_0618,SAUSA300_0619,SAUSA300_0620	2	2.499	1.00397	0.995531
SAUSA300_0599-SAUSA300_0600-SAUSA300_0601	SAUSA300_0599,SAUSA300_0600,SAUSA300_0601	2	2.508	1.00036	0.999588

## Sheet: type C>C
Operon enrichment analysis (type C>C variants)
OPERON	operon_gene_list	n_mutations	operon_length	enrichment	glm.pval
agrB-agrD-agrC-agrA	SAUSA300_1989,SAUSA300_1990,SAUSA300_1991,SAUSA300_1992	8	2.758	6.69647	3.96156e-05
SAUSA300_2398-SAUSA300_2399	SAUSA300_2398,SAUSA300_2399	5	1.431	8.06641	0.000491447
SAUSA300_pUSA030010-SAUSA300_pUSA030011-SAUSA300_pUSA030012-SAUSA300_pUSA030013-SAUSA300_pUSA030014-SAUSA300_pUSA030015-SAUSA300_pUSA030016-SAUSA300_pUSA030017-SAUSA300_pUSA030018-SAUSA300_pUSA030019-SAUSA300_pUSA030020	SAUSA300_pUSA030010,SAUSA300_pUSA030011,SAUSA300_pUSA030012,SAUSA300_pUSA030013,SAUSA300_pUSA030014,SAUSA300_pUSA030015,SAUSA300_pUSA030016,SAUSA300_pUSA030017,SAUSA300_pUSA030018,SAUSA300_pUSA030019,SAUSA300_pUSA030020	0	11.594	0	0.00149477
recU-pbp2	SAUSA300_1340,SAUSA300_1341	6	2.806	4.93644	0.00191663
SAUSA300_1118-fakA	SAUSA300_1118,SAUSA300_1119	5	2.035	5.67225	0.00249223
acyP-xpaC-SAUSA300_1299	SAUSA300_1297,SAUSA300_1298,SAUSA300_1299	5	2.085	5.53623	0.00277989
sucB-sucA	SAUSA300_1305,SAUSA300_1306	7	4.08	3.96084	0.00293183
dat-SAUSA300_1697	SAUSA300_1696,SAUSA300_1697	5	2.261	5.10528	0.0039915
SAUSA300_0931-SAUSA300_0932	SAUSA300_0931,SAUSA300_0932	3	0.793	8.73369	0.0055174
epiG-epiE-epiF-epiP-epiD-epiC-epiB-epiA	SAUSA300_1760,SAUSA300_1761,SAUSA300_1762,SAUSA300_1763,SAUSA300_1764,SAUSA300_1765,SAUSA300_1766,SAUSA300_1767	0	8.523	0	0.0065016
ilvD-ilvB-ilvH	SAUSA300_2006,SAUSA300_2007,SAUSA300_2008	6	3.739	3.70464	0.00821814
SAUSA300_1703-leuS	SAUSA300_1703,SAUSA300_1704	5	2.75	4.19747	0.00937113
addB-addA	SAUSA300_0869,SAUSA300_0870	0	7.13	0	0.0128306
pgpB-murG-SAUSA300_1312	SAUSA300_1310,SAUSA300_1311,SAUSA300_1312	4	2.222	4.15591	0.0208876
arcC-arcB-SAUSA300_0063-arcD-arcA	SAUSA300_0061,SAUSA300_0062,SAUSA300_0063,SAUSA300_0064,SAUSA300_0065	0	5.458	0	0.0295132
SAUSA300_0072-SAUSA300_0073-opp-3B-opp-3C-SAUSA300_0076-SAUSA300_0077	SAUSA300_0072,SAUSA300_0073,SAUSA300_0074,SAUSA300_0075,SAUSA300_0076,SAUSA300_0077	0	5.276	0	0.032363
sigB-rsbW-rsbV-rsbU	SAUSA300_2022,SAUSA300_2023,SAUSA300_2024,SAUSA300_2025	4	2.672	3.456	0.0392785
folP-folB-folK	SAUSA300_0492,SAUSA300_0493,SAUSA300_0494	3	1.619	4.27784	0.0420844
arcC-arcD-arcB-arcA	SAUSA300_2567,SAUSA300_2568,SAUSA300_2569,SAUSA300_2570	0	4.757	0	0.0421802
rbgA-rnhB	SAUSA300_1136,SAUSA300_1137	3	1.635	4.23598	0.0432242
gntP-gntK-gntR-SAUSA300_2445	SAUSA300_2442,SAUSA300_2443,SAUSA300_2444,SAUSA300_2445	0	4.65	0	0.0445668
SAUSA300_2556-SAUSA300_2557-nsaS-nsaR-SAUSA300_2560	SAUSA300_2556,SAUSA300_2557,SAUSA300_2558,SAUSA300_2559,SAUSA300_2560	0	4.649	0	0.0445897
SAUSA300_0866-spsA-spsB	SAUSA300_0866,SAUSA300_0867,SAUSA300_0868	3	1.695	4.08603	0.0476536
vraA-vraB-vraC	SAUSA300_0559,SAUSA300_0560,SAUSA300_0561	4	2.857	3.23221	0.0490755
fadD-fadE-fadX	SAUSA300_0227,SAUSA300_0228,SAUSA300_0229	0	4.431	0	0.0499055
SAUSA300_1519-trmK	SAUSA300_1519,SAUSA300_1520	3	1.78	3.89091	0.054349
dnaE-pde2	SAUSA300_1649,SAUSA300_1650	0	4.159	0	0.0574925
alr-acpS-SAUSA300_2029-SAUSA300_2030-SAUSA300_2031	SAUSA300_2027,SAUSA300_2028,SAUSA300_2029,SAUSA300_2030,SAUSA300_2031	0	4.11	0	0.0589846
gltB-gltD	SAUSA300_0445,SAUSA300_0446	6	5.98	2.31633	0.0701599
xerC-clpQ-hslU-codY	SAUSA300_1145,SAUSA300_1146,SAUSA300_1147,SAUSA300_1148	0	3.705	0	0.073016
tatC-tatA	SAUSA300_0347,SAUSA300_0348	2	0.942	4.9015	0.0746207
cstA-cstB-sqr	SAUSA300_0085,SAUSA300_0086,SAUSA300_0087	0	3.644	0	0.0754215
coaBC-priA	SAUSA300_1104,SAUSA300_1105	0	3.607	0	0.0769219
SAUSA300_1329-ilvA1-ald1	SAUSA300_1329,SAUSA300_1330,SAUSA300_1331	0	3.606	0	0.0769629
SAUSA300_0595-argS	SAUSA300_0595,SAUSA300_0596	3	2.041	3.39335	0.0779897
phnE1-phnE2-phnC-phnD	SAUSA300_0142,SAUSA300_0143,SAUSA300_0144,SAUSA300_0145	0	3.557	0	0.0790007
opuCD-opuCC-opuCB-opuCA	SAUSA300_2390,SAUSA300_2391,SAUSA300_2392,SAUSA300_2393	0	3.511	0	0.0809665
SAUSA300_1741-SAUSA300_1742-SAUSA300_1743	SAUSA300_1741,SAUSA300_1742,SAUSA300_1743	2	1.011	4.56698	0.0856017
uvrB-uvrA	SAUSA300_0741,SAUSA300_0742	5	4.839	2.38542	0.0886044
nreC-nreB-nreA-narI-narJ-narH-narG	SAUSA300_2337,SAUSA300_2338,SAUSA300_2339,SAUSA300_2340,SAUSA300_2341,SAUSA300_2342,SAUSA300_2343	1	8.682	0.265907	0.0894328
SAUSA300_1217-SAUSA300_1218-SAUSA300_1219-SAUSA300_1220	SAUSA300_1217,SAUSA300_1218,SAUSA300_1219,SAUSA300_1220	0	3.302	0	0.0905877
pdhA-pdhB-pdhC-pdhD	SAUSA300_0993,SAUSA300_0994,SAUSA300_0995,SAUSA300_0996	5	4.886	2.36247	0.091749
truA-ecfT-cbiO1-cbiO	SAUSA300_2173,SAUSA300_2174,SAUSA300_2175,SAUSA300_2176	0	3.27	0	0.0921669
gbaA-gbaB-SAUSA300_2517-SAUSA300_2518	SAUSA300_2515,SAUSA300_2516,SAUSA300_2517,SAUSA300_2518	0	3.212	0	0.095106
gatB-gatA-gatC	SAUSA300_1880,SAUSA300_1881,SAUSA300_1882	0	3.201	0	0.0956748
SAUSA300_1660-thiI-nifZ	SAUSA300_1660,SAUSA300_1661,SAUSA300_1662	0	3.176	0	0.0969814
SAUSA300_0362-SAUSA300_0363-ychF	SAUSA300_0362,SAUSA300_0363,SAUSA300_0364	3	2.223	3.11553	0.0971973
recD2-SAUSA300_1577	SAUSA300_1576,SAUSA300_1577	0	3.147	0	0.0985215
SAUSA300_2624-SAUSA300_2625	SAUSA300_2624,SAUSA300_2625	2	1.095	4.21663	0.0998128
dprA-topA	SAUSA300_1142,SAUSA300_1143	0	3.121	0	0.0999248
mnmA-iscS	SAUSA300_1578,SAUSA300_1579	3	2.261	3.06317	0.101485
SAUSA300_0567-SAUSA300_0568	SAUSA300_0567,SAUSA300_0568	2	1.115	4.141	0.103328
ispA-xseB-xseA-nusB-SAUSA300_1474-accC-accB	SAUSA300_1470,SAUSA300_1471,SAUSA300_1472,SAUSA300_1473,SAUSA300_1474,SAUSA300_1475,SAUSA300_1476	5	5.081	2.2718	0.105509
ccrB-ccrA	SAUSA300_0037,SAUSA300_0038	0	2.999	0	0.106808
cntM-cntL-cntK	SAUSA300_2412,SAUSA300_2413,SAUSA300_2414	0	2.944	0	0.11008
hsdS2-hsdM2	SAUSA300_1751,SAUSA300_1752	0	2.931	0	0.110869
hutI-hutU	SAUSA300_2277,SAUSA300_2278	0	2.899	0	0.112838
SAUSA300_1439-SAUSA300_1440	SAUSA300_1439,SAUSA300_1440	0	2.888	0	0.113524
SAUSA300_0197-SAUSA300_0198-SAUSA300_0199	SAUSA300_0197,SAUSA300_0198,SAUSA300_0199	0	2.866	0	0.11491
fhuC-fhuB-fhuG	SAUSA300_0633,SAUSA300_0634,SAUSA300_0635	0	2.85	0	0.115929
SAUSA300_0900-trfB-pepF	SAUSA300_0900,SAUSA300_0901,SAUSA300_0902	0	2.841	0	0.116507
apt-recJ	SAUSA300_1591,SAUSA300_1592	0	2.813	0	0.118324
budA1-budB	SAUSA300_2165,SAUSA300_2166	3	2.405	2.87976	0.118582
SAUSA300_1532-SAUSA300_1533-SAUSA300_1534	SAUSA300_1532,SAUSA300_1533,SAUSA300_1534	3	2.405	2.87976	0.118582
SAUSA300_2095-manA	SAUSA300_2095,SAUSA300_2096	2	1.199	3.85089	0.118618
lpl9-SAUSA300_0420-SAUSA300_0421-SAUSA300_0422	SAUSA300_0419,SAUSA300_0420,SAUSA300_0421,SAUSA300_0422	0	2.783	0	0.120307
vraR-vraS-vraT-vraU	SAUSA300_1865,SAUSA300_1866,SAUSA300_1867,SAUSA300_1868	0	2.761	0	0.121784
hsdM1-hsdS1	SAUSA300_0405,SAUSA300_0406	0	2.76	0	0.121852
SAUSA300_2425-SAUSA300_2426-SAUSA300_2427-SAUSA300_2428-SAUSA300_2429	SAUSA300_2425,SAUSA300_2426,SAUSA300_2427,SAUSA300_2428,SAUSA300_2429	0	2.721	0	0.124522
ausA-SAUSA300_0182	SAUSA300_0181,SAUSA300_0182	1	7.832	0.294766	0.125189
menC-menE	SAUSA300_1735,SAUSA300_1737	3	2.484	2.78817	0.128523
SAUSA300_1182-SAUSA300_1183	SAUSA300_1182,SAUSA300_1183	0	2.627	0	0.131228
pepT-SAUSA300_0728-SAUSA300_0729	SAUSA300_0727,SAUSA300_0728,SAUSA300_0729	3	2.513	2.756	0.13227
copA-SAUSA300_0079	SAUSA300_0078,SAUSA300_0079	0	2.587	0	0.134203
SAUSA300_0298-SAUSA300_0299-SAUSA300_0300-SAUSA300_0301-SAUSA300_0302	SAUSA300_0298,SAUSA300_0299,SAUSA300_0300,SAUSA300_0301,SAUSA300_0302	0	2.533	0	0.138339
gcp-rimI-tsaB-tsaE	SAUSA300_2002,SAUSA300_2003,SAUSA300_2004,SAUSA300_2005	0	2.532	0	0.138417
SAUSA300_0599-SAUSA300_0600-SAUSA300_0601	SAUSA300_0599,SAUSA300_0600,SAUSA300_0601	0	2.508	0	0.140302
argH-argG	SAUSA300_0863,SAUSA300_0864	3	2.574	2.69068	0.140321
hflX-SAUSA300_1199	SAUSA300_1198,SAUSA300_1199	0	2.495	0	0.141335
opuBA-opuBB	SAUSA300_0706,SAUSA300_0707	0	2.484	0	0.142216
lytS-lytR	SAUSA300_0254,SAUSA300_0255	0	2.482	0	0.142377
sbnA-sbnB-sbnC-sbnD-sbnE-sbnF-sbnG-sbnH-sbnI	SAUSA300_0118,SAUSA300_0119,SAUSA300_0120,SAUSA300_0121,SAUSA300_0122,SAUSA300_0123,SAUSA300_0124,SAUSA300_0125,SAUSA300_0126	2	11.157	0.41384	0.142617
SAUSA300_2020-SAUSA300_2021	SAUSA300_2020,SAUSA300_2021	3	2.598	2.66583	0.143551
ipk-purR-yabJ-spoVG	SAUSA300_0472,SAUSA300_0473,SAUSA300_0474,SAUSA300_0475	0	2.457	0	0.144405
gnd-SAUSA300_1460	SAUSA300_1459,SAUSA300_1460	3	2.607	2.65662	0.144771
SAUSA300_2447-SAUSA300_2448	SAUSA300_2447,SAUSA300_2448	0	2.447	0	0.145225
miaB-SAUSA300_1186-SAUSA300_1187	SAUSA300_1185,SAUSA300_1186,SAUSA300_1187	0	2.428	0	0.146798
rumA-dgkB	SAUSA300_1878,SAUSA300_1879	0	2.389	0	0.150086
graX-graR-graS	SAUSA300_0644,SAUSA300_0645,SAUSA300_0646	3	2.646	2.61747	0.150114
SAUSA300_1997-SAUSA300_1998	SAUSA300_1997,SAUSA300_1998	2	1.363	3.38754	0.150772
cydA-cydB	SAUSA300_0986,SAUSA300_0987	0	2.377	0	0.151115
SAUSA300_2086-hmrA	SAUSA300_2086,SAUSA300_2087	0	2.377	0	0.151115
SAUSA300_1523-ccpN	SAUSA300_1523,SAUSA300_1524	2	1.368	3.37516	0.151797
ltaA-ugtP	SAUSA300_0917,SAUSA300_0918	0	2.343	0	0.154073
recQ2-SAUSA300_1372	SAUSA300_1371,SAUSA300_1372	0	2.322	0	0.155933
sbcD-sbcC	SAUSA300_1242,SAUSA300_1243	4	4.154	2.22302	0.15756
gapR-gapA-pgk-tpiA-pgm-eno	SAUSA300_0755,SAUSA300_0756,SAUSA300_0757,SAUSA300_0758,SAUSA300_0759,SAUSA300_0760	1	7.242	0.31878	0.15784
sek-seq-SAUSA300_0802-SAUSA300_0803	SAUSA300_0800,SAUSA300_0801,SAUSA300_0802,SAUSA300_0803	0	2.299	0	0.157999
SAUSA300_0383-SAUSA300_0384-SAUSA300_0385	SAUSA300_0383,SAUSA300_0384,SAUSA300_0385	0	2.286	0	0.15918
nadE-pncB	SAUSA300_1893,SAUSA300_1894	0	2.283	0	0.159454
clpX-tig	SAUSA300_1621,SAUSA300_1622	3	2.714	2.55189	0.159645
trnaG-trnaC-trnaQ-trnaH-trnaW-trnaY-trnaT-trnaL-trnaD-trnaM-trnaS-trnaD-trnaS-trnaM-trnaM-trnaA-trnaP-trnaR-trnaL-trnaG-trnaL-trnaK-trnaT-trnaV-rrfC	SAUSA300_1813,SAUSA300_1814,SAUSA300_1815,SAUSA300_1816,SAUSA300_1817,SAUSA300_1818,SAUSA300_1819,SAUSA300_1820,SAUSA300_1821,SAUSA300_1822,SAUSA300_1823,SAUSA300_1824,SAUSA300_1825,SAUSA300_1826,SAUSA300_1827,SAUSA300_1828,SAUSA300_1829,SAUSA300_1830,SAUSA300_1831,SAUSA300_1832,SAUSA300_1833,SAUSA300_1834,SAUSA300_1835,SAUSA300_1836,SAUSA300_1837	0	2.258	0	0.16176
rbsK-rbsD-rbsU	SAUSA300_0262,SAUSA300_0263,SAUSA300_0264	0	2.242	0	0.163255
cls2-SAUSA300_2045	SAUSA300_2044,SAUSA300_2045	0	2.234	0	0.164008
ssl11-SAUSA300_0408	SAUSA300_0407,SAUSA300_0408	0	2.207	0	0.166581
tcyC-tcyB-tcyA	SAUSA300_2357,SAUSA300_2358,SAUSA300_2359	0	2.207	0	0.166581
SAUSA300_0832-nagD-SAUSA300_0834	SAUSA300_0832,SAUSA300_0833,SAUSA300_0834	0	2.205	0	0.166773
fabH-fabF	SAUSA300_0885,SAUSA300_0886	0	2.197	0	0.167545
cdr-SAUSA300_0874	SAUSA300_0873,SAUSA300_0874	0	2.192	0	0.16803
rpsP-rimM-trmD-rplS	SAUSA300_1131,SAUSA300_1132,SAUSA300_1133,SAUSA300_1134	0	2.156	0	0.171567
recN-argR	SAUSA300_1468,SAUSA300_1469	0	2.147	0	0.172465
SAUSA300_2287-SAUSA300_2288	SAUSA300_2287,SAUSA300_2288	0	2.124	0	0.174783
SAUSA300_0824-SAUSA300_0825	SAUSA300_0824,SAUSA300_0825	0	2.121	0	0.175088
SAUSA300_1194-miaA-hfq	SAUSA300_1194,SAUSA300_1195,SAUSA300_1196	0	2.115	0	0.1757
mhqE-mhqD	SAUSA300_2457,SAUSA300_2458	2	1.487	3.10505	0.176919
lukG-lukH	SAUSA300_1974,SAUSA300_1975	0	2.093	0	0.177965
zur-znuB-znuC	SAUSA300_1514,SAUSA300_1515,SAUSA300_1516	0	2.087	0	0.178588
hisI-hisF-hisA-hisH-hisB-SAUSA300_2610-hisD-hisG-hisZ	SAUSA300_2605,SAUSA300_2606,SAUSA300_2607,SAUSA300_2608,SAUSA300_2609,SAUSA300_2610,SAUSA300_2611,SAUSA300_2612,SAUSA300_2613	1	6.925	0.333373	0.178655
fabZ-murA1-SAUSA300_2056	SAUSA300_2054,SAUSA300_2055,SAUSA300_2056	0	2.083	0	0.179005
SAUSA300_0238-SAUSA300_0239-SAUSA300_0240	SAUSA300_0238,SAUSA300_0239,SAUSA300_0240	3	2.849	2.43097	0.179359
SAUSA300_1859-ampS-SAUSA300_1861	SAUSA300_1859,SAUSA300_1860,SAUSA300_1861	0	2.079	0	0.179424
SAUSA300_0039-SAUSA300_0040	SAUSA300_0039,SAUSA300_0040	0	2.077	0	0.179633
deoD1-tet38	SAUSA300_0138,SAUSA300_0139	0	2.066	0	0.180791
hssR-hssS	SAUSA300_2308,SAUSA300_2309	0	2.04	0	0.183561
mccA-mccB	SAUSA300_0433,SAUSA300_0434	0	2.04	0	0.183561
SAUSA300_0579-SAUSA300_0580	SAUSA300_0579,SAUSA300_0580	0	2.039	0	0.183668
ilvC-leuA-leuB-leuC-leuD-ilvA2	SAUSA300_2009,SAUSA300_2010,SAUSA300_2011,SAUSA300_2012,SAUSA300_2013,SAUSA300_2014	1	6.852	0.336924	0.183813
nagB-hxlA-hxlB	SAUSA300_0554,SAUSA300_0555,SAUSA300_0556	0	2.017	0	0.186052
SAUSA300_2512-SAUSA300_2513-SAUSA300_2514	SAUSA300_2512,SAUSA300_2513,SAUSA300_2514	2	1.534	3.00992	0.187206
SAUSA300_1376-SAUSA300_1377-SAUSA300_1378	SAUSA300_1376,SAUSA300_1377,SAUSA300_1378	0	2.006	0	0.187258
rluB-scpB-scpA	SAUSA300_1443,SAUSA300_1444,SAUSA300_1445	0	1.996	0	0.188362
ptsH-ptsI	SAUSA300_0983,SAUSA300_0984	0	1.987	0	0.189362
SAUSA300_1906-SAUSA300_1907-SAUSA300_1908	SAUSA300_1906,SAUSA300_1907,SAUSA300_1908	0	1.98	0	0.190144
groEL-groES	SAUSA300_1982,SAUSA300_1983	0	1.976	0	0.190592
thiE-thiM-thiD-tenA	SAUSA300_2047,SAUSA300_2048,SAUSA300_2049,SAUSA300_2050	3	2.93	2.36376	0.191675
argF-arcC1	SAUSA300_1062,SAUSA300_1063	0	1.956	0	0.192853
SAUSA300_1785-ecsA	SAUSA300_1785,SAUSA300_1786	0	1.956	0	0.192853
perR-SAUSA300_1843-SAUSA300_1844	SAUSA300_1842,SAUSA300_1843,SAUSA300_1844	0	1.954	0	0.193081
nasF-nasE-nasD-nirR	SAUSA300_2344,SAUSA300_2345,SAUSA300_2346,SAUSA300_2347	4	4.488	2.05758	0.19664
rnjA-rpoY	SAUSA300_0989,SAUSA300_0990	0	1.915	0	0.197588
sepA-sdrM	SAUSA300_2127,SAUSA300_2128	0	1.915	0	0.197588
truB-ribC	SAUSA300_1164,SAUSA300_1165	0	1.903	0	0.198999
murI-SAUSA300_1050-SAUSA300_1051	SAUSA300_1049,SAUSA300_1050,SAUSA300_1051	0	1.895	0	0.199946
SAUSA300_0442-SAUSA300_0443	SAUSA300_0442,SAUSA300_0443	0	1.891	0	0.200422
nos-pheA	SAUSA300_1895,SAUSA300_1896	0	1.89	0	0.200541
mepR-mepA	SAUSA300_0334,SAUSA300_0335	0	1.881	0	0.201617
sirC-sirB-sirA	SAUSA300_0115,SAUSA300_0116,SAUSA300_0117	3	2.998	2.31015	0.202287
SAUSA300_2213-femX	SAUSA300_2213,SAUSA300_2214	4	4.549	2.02999	0.204235
eutD-lipL	SAUSA300_0570,SAUSA300_0571	0	1.825	0	0.208467
smc-ftsY-SAUSA300_1129-ffh	SAUSA300_1127,SAUSA300_1128,SAUSA300_1129,SAUSA300_1130	1	6.528	0.353647	0.208494
galE-SAUSA300_0131	SAUSA300_0130,SAUSA300_0131	2	1.635	2.82398	0.209956
queE-queD-queC	SAUSA300_0695,SAUSA300_0696,SAUSA300_0697	0	1.806	0	0.210853
pitR-pitA	SAUSA300_0649,SAUSA300_0650	2	1.64	2.81537	0.211104
SAUSA300_0767-SAUSA300_0768	SAUSA300_0767,SAUSA300_0768	1	0.485	4.76001	0.214369
SAUSA300_0981-SAUSA300_0982	SAUSA300_0981,SAUSA300_0982	0	1.768	0	0.215723
SAUSA300_1684-SAUSA300_1685	SAUSA300_1684,SAUSA300_1685	0	1.764	0	0.216243
glnR-glnA	SAUSA300_1200,SAUSA300_1201	0	1.727	0	0.221128
SAUSA300_0576-SAUSA300_0577	SAUSA300_0576,SAUSA300_0577	0	1.725	0	0.221395
SAUSA300_0666-SAUSA300_0667-SAUSA300_0668	SAUSA300_0666,SAUSA300_0667,SAUSA300_0668	0	1.712	0	0.223145
SAUSA300_0659-SAUSA300_0660	SAUSA300_0659,SAUSA300_0660	0	1.705	0	0.224095
SAUSA300_0701-SAUSA300_0702	SAUSA300_0701,SAUSA300_0702	0	1.698	0	0.225049
SAUSA300_2102-SAUSA300_2103	SAUSA300_2102,SAUSA300_2103	2	1.707	2.70487	0.226676
SAUSA300_0846-SAUSA300_0847	SAUSA300_0846,SAUSA300_0847	2	1.709	2.7017	0.227146
SAUSA300_0091-SAUSA300_0092	SAUSA300_0091,SAUSA300_0092	0	1.674	0	0.228357
efp-pepQ2	SAUSA300_1490,SAUSA300_1491	0	1.644	0	0.232574
SAUSA300_2216-SAUSA300_2217	SAUSA300_2216,SAUSA300_2217	0	1.644	0	0.232574
SAUSA300_0957-SAUSA300_0958	SAUSA300_0957,SAUSA300_0958	2	1.735	2.66122	0.233284
SAUSA300_2334-SAUSA300_2335-SAUSA300_2336	SAUSA300_2334,SAUSA300_2335,SAUSA300_2336	0	1.633	0	0.234144
SAUSA300_2451-SAUSA300_2452	SAUSA300_2451,SAUSA300_2452	0	1.62	0	0.236016
lpl7-lpl8	SAUSA300_0417,SAUSA300_0418	0	1.619	0	0.236161
fapR-plsX-fabD-fabG	SAUSA300_1121,SAUSA300_1122,SAUSA300_1123,SAUSA300_1124	3	3.209	2.15825	0.236722
airR-airS	SAUSA300_1798,SAUSA300_1799	2	1.757	2.6279	0.238516
cspR-queG	SAUSA300_1805,SAUSA300_1806	0	1.602	0	0.238638
SAUSA300_2406-cntF-cntD-cnzC-cntB-cntA	SAUSA300_2406,SAUSA300_2407,SAUSA300_2408,SAUSA300_2409,SAUSA300_2410,SAUSA300_2411	1	6.171	0.374106	0.239391
hemL-hemB-hemD-hemC-hemX-hemA	SAUSA300_1614,SAUSA300_1615,SAUSA300_1616,SAUSA300_1617,SAUSA300_1618,SAUSA300_1619	1	6.152	0.375261	0.241153
uppS-cdsA	SAUSA300_1153,SAUSA300_1154	0	1.559	0	0.245046
SAUSA300_1623-SAUSA300_1624	SAUSA300_1623,SAUSA300_1624	0	1.556	0	0.245501
pncA-ppaC	SAUSA300_1899,SAUSA300_1900	0	1.542	0	0.247637
moaB-moeB	SAUSA300_2226,SAUSA300_2227	0	1.541	0	0.24779
SAUSA300_1795-SAUSA300_1796	SAUSA300_1795,SAUSA300_1796	0	1.537	0	0.248405
murE-SAUSA300_0920-prfC	SAUSA300_0919,SAUSA300_0920,SAUSA300_0921	3	3.287	2.10703	0.249999
SAUSA300_0670-SAUSA300_0671	SAUSA300_0670,SAUSA300_0671	3	3.301	2.0981	0.252411
SAUSA300_0476-glmU	SAUSA300_0476,SAUSA300_0477	0	1.506	0	0.253236
ribH-ribA-ribB-ribD	SAUSA300_1712,SAUSA300_1713,SAUSA300_1714,SAUSA300_1715	3	3.312	2.09113	0.254313
acuA-acuC	SAUSA300_1680,SAUSA300_1681	2	1.826	2.52859	0.255143
SAUSA300_2318-iruO	SAUSA300_2318,SAUSA300_2319	0	1.471	0	0.258828
SAUSA300_0544-azo1	SAUSA300_0544,SAUSA300_0545	0	1.456	0	0.261272
deoC1-deoB	SAUSA300_0140,SAUSA300_0141	2	1.868	2.47174	0.265418
lspA-SAUSA300_1090	SAUSA300_1089,SAUSA300_1090	0	1.408	0	0.269286
ctaB-ctaM	SAUSA300_1016,SAUSA300_1017	0	1.397	0	0.271166
xerD-fur	SAUSA300_1447,SAUSA300_1448	0	1.385	0	0.273235
trmB-SAUSA300_1695	SAUSA300_1694,SAUSA300_1695	0	1.384	0	0.273408
SAUSA300_2465-SAUSA300_2466	SAUSA300_2465,SAUSA300_2466	0	1.372	0	0.275499
SAUSA300_pUSA030034-SAUSA300_pUSA030035	SAUSA300_pUSA030034,SAUSA300_pUSA030035	0	1.372	0	0.275499
rnpA-rpmH	SAUSA300_2647,SAUSA300_2648	1	0.611	3.77841	0.275571
icaB-icaC	SAUSA300_2601,SAUSA300_2602	2	1.911	2.41612	0.276052
mutS-mutL-glpP	SAUSA300_1188,SAUSA300_1189,SAUSA300_1190	4	5.092	1.81352	0.277625
SAUSA300_0233-hmp	SAUSA300_0233,SAUSA300_0234	0	1.344	0	0.280455
fakB2-dfrA	SAUSA300_1318,SAUSA300_1319	0	1.333	0	0.282433
SAUSA300_pUSA030021-SAUSA300_pUSA030022	SAUSA300_pUSA030021,SAUSA300_pUSA030022	0	1.326	0	0.283701
rplK-rplA	SAUSA300_0522,SAUSA300_0523	0	1.322	0	0.284429
czrA-czrB	SAUSA300_2098,SAUSA300_2099	0	1.302	0	0.288104
pyrH-frr	SAUSA300_1151,SAUSA300_1152	0	1.295	0	0.289404
SAUSA300_0275-SAUSA300_0276	SAUSA300_0275,SAUSA300_0276	0	1.274	0	0.29335
comGD-comGC-comGB-comGA-SAUSA300_1505-SAUSA300_1506-glk-SAUSA300_1508-SAUSA300_1509-SAUSA300_1510	SAUSA300_1501,SAUSA300_1502,SAUSA300_1503,SAUSA300_1504,SAUSA300_1505,SAUSA300_1506,SAUSA300_1507,SAUSA300_1508,SAUSA300_1509,SAUSA300_1510	5	6.947	1.66159	0.293718
dck-dgk	SAUSA300_0541,SAUSA300_0542	0	1.272	0	0.293729
ugpQ-maoC	SAUSA300_0030,SAUSA300_0031	0	1.268	0	0.29449
SAUSA300_0056-SAUSA300_0057-SAUSA300_0058-SAUSA300_0059	SAUSA300_0056,SAUSA300_0057,SAUSA300_0058,SAUSA300_0059	0	1.267	0	0.29468
SAUSA300_0241-SAUSA300_0242-SAUSA300_0243-SAUSA300_0244	SAUSA300_0241,SAUSA300_0242,SAUSA300_0243,SAUSA300_0244	3	3.547	1.95259	0.296196
SAUSA300_0586-SAUSA300_0587	SAUSA300_0586,SAUSA300_0587	0	1.241	0	0.299691
SAUSA300_0393-SAUSA300_0394	SAUSA300_0393,SAUSA300_0394	0	1.223	0	0.303224
panD-panC-panB	SAUSA300_2532,SAUSA300_2533,SAUSA300_2534	2	2.02	2.28575	0.30349
mecR1-rplL	SAUSA300_0033,SAUSA300_0035	0	1.218	0	0.304215
mnaA-upp-glyA-SAUSA300_2068	SAUSA300_2065,SAUSA300_2066,SAUSA300_2067,SAUSA300_2068	3	3.597	1.92544	0.305399
SAUSA300_0655-SAUSA300_0656	SAUSA300_0655,SAUSA300_0656	0	1.189	0	0.310045
est-rnr-smpB	SAUSA300_0763,SAUSA300_0764,SAUSA300_0765	3	3.632	1.90689	0.311899
mdh-metE-metF-metC-metI	SAUSA300_0356,SAUSA300_0357,SAUSA300_0358,SAUSA300_0359,SAUSA300_0360	5	7.09	1.62807	0.311989
rplT-rpmI-infC	SAUSA300_1625,SAUSA300_1626,SAUSA300_1627	0	1.159	0	0.316231
lrgA-lrgB	SAUSA300_0256,SAUSA300_0257	0	1.137	0	0.32087
holB-SAUSA300_0462-SAUSA300_0463	SAUSA300_0461,SAUSA300_0462,SAUSA300_0463	2	2.094	2.20497	0.322477
SAUSA300_0321-SAUSA300_0322	SAUSA300_0321,SAUSA300_0322	2	2.099	2.19972	0.32377
rpsF-ssb-rpsR	SAUSA300_0366,SAUSA300_0367,SAUSA300_0368	0	1.114	0	0.325816
SAUSA300_1770-SAUSA300_1771	SAUSA300_1770,SAUSA300_1771	0	1.109	0	0.326904
SAUSA300_pUSA030004-SAUSA300_pUSA030005	SAUSA300_pUSA030004,SAUSA300_pUSA030005	0	1.102	0	0.328437
atpC-atpD-atpG-atpA-atpH-atpF	SAUSA300_2057,SAUSA300_2058,SAUSA300_2059,SAUSA300_2060,SAUSA300_2061,SAUSA300_2062	1	5.345	0.431919	0.328637
SAUSA300_1210-SAUSA300_1211-SAUSA300_1212-SAUSA300_1213	SAUSA300_1210,SAUSA300_1211,SAUSA300_1212,SAUSA300_1213	0	1.084	0	0.33242
srtB-isdG	SAUSA300_1034,SAUSA300_1035	0	1.076	0	0.334211
fepA-fepB-fepC	SAUSA300_0344,SAUSA300_0345,SAUSA300_0346	3	3.773	1.83563	0.338535
secE-nusG	SAUSA300_0520,SAUSA300_0521	1	0.743	3.10714	0.33963
mtlF-mtlR-mtlA-mtlD	SAUSA300_2105,SAUSA300_2106,SAUSA300_2107,SAUSA300_2108	1	5.257	0.439149	0.339831
ptpA-SAUSA300_1863	SAUSA300_1862,SAUSA300_1863	1	0.746	3.09465	0.341081
ung-SAUSA300_0564	SAUSA300_0563,SAUSA300_0564	0	1.037	0	0.343131
SAUSA300_2496-SAUSA300_2497	SAUSA300_2496,SAUSA300_2497	2	2.175	2.12286	0.343557
rsmD-coaD	SAUSA300_1023,SAUSA300_1024	0	1.026	0	0.345704
SAUSA300_0010-SAUSA300_0011	SAUSA300_0010,SAUSA300_0011	0	1.021	0	0.346883
tarI-tarJ-tarL-tarS	SAUSA300_0249,SAUSA300_0250,SAUSA300_0251,SAUSA300_0252	1	5.201	0.443877	0.347143
saeS-saeR-saeQ	SAUSA300_0690,SAUSA300_0691,SAUSA300_0692	2	2.189	2.10928	0.34723
tauE-cstR	SAUSA300_0083,SAUSA300_0084	0	1.015	0	0.348304
SAUSA300_0293-SAUSA300_0294	SAUSA300_0293,SAUSA300_0294	0	1.011	0	0.349256
SAUSA300_0792-SAUSA300_0793	SAUSA300_0792,SAUSA300_0793	0	0.993	0	0.353584
atpE-atpB	SAUSA300_2063,SAUSA300_2064	0	0.983	0	0.35602
feoB-feoA	SAUSA300_2487,SAUSA300_2488	2	2.233	2.06772	0.358824
treP-treC-treR	SAUSA300_0448,SAUSA300_0449,SAUSA300_0450	3	3.884	1.78317	0.359982
SAUSA300_0259-bglA	SAUSA300_0259,SAUSA300_0260	2	2.243	2.0585	0.36147
SAUSA300_2474-SAUSA300_2475	SAUSA300_2474,SAUSA300_2475	1	0.796	2.90026	0.365213
SAUSA300_2522-SAUSA300_2523-SAUSA300_2524	SAUSA300_2522,SAUSA300_2523,SAUSA300_2524	0	0.945	0	0.365489
cbf1-SAUSA300_1792-SAUSA300_1793	SAUSA300_1791,SAUSA300_1792,SAUSA300_1793	1	5.06	0.456246	0.36622
rpmA-SAUSA300_1602-rplU	SAUSA300_1601,SAUSA300_1602,SAUSA300_1603	0	0.93	0	0.369324
SAUSA300_0453-recR	SAUSA300_0453,SAUSA300_0454	0	0.92	0	0.371912
SAUSA300_1026-rpmF	SAUSA300_1026,SAUSA300_1027	1	0.81	2.85013	0.371952
rplJ-rplL	SAUSA300_0524,SAUSA300_0525	0	0.911	0	0.374262
SAUSA300_2294-SAUSA300_2295	SAUSA300_2294,SAUSA300_2295	0	0.907	0	0.375313
greA-udk-SAUSA300_1569-SAUSA300_1570-SAUSA300_1571	SAUSA300_1567,SAUSA300_1568,SAUSA300_1569,SAUSA300_1570,SAUSA300_1571	3	3.971	1.7441	0.377064
SAUSA300_2310-SAUSA300_2311	SAUSA300_2310,SAUSA300_2311	0	0.895	0	0.378491
SAUSA300_pUSA030023-SAUSA300_pUSA030024	SAUSA300_pUSA030023,SAUSA300_pUSA030024	0	0.879	0	0.382789
gpsA-engA	SAUSA300_1363,SAUSA300_1364	2	2.325	1.9859	0.383303
noc-gidB-gidA-trmE	SAUSA300_2643,SAUSA300_2644,SAUSA300_2645,SAUSA300_2646	1	4.924	0.468848	0.38556
gmk-rpoZ	SAUSA300_1102,SAUSA300_1103	1	0.841	2.74507	0.386842
splF-splE-splD-splC-splB-splA	SAUSA300_1753,SAUSA300_1754,SAUSA300_1755,SAUSA300_1756,SAUSA300_1757,SAUSA300_1758	1	4.915	0.469706	0.386873
SAUSA300_2419-SAUSA300_2420	SAUSA300_2419,SAUSA300_2420	0	0.856	0	0.389088
rpsI-rplM	SAUSA300_2171,SAUSA300_2172	1	0.849	2.71921	0.390677
ulaA-SAUSA300_0331-SAUSA300_0332-SAUSA300_0333	SAUSA300_0330,SAUSA300_0331,SAUSA300_0332,SAUSA300_0333	3	4.05	1.71008	0.392767
SAUSA300_0806-SAUSA300_0807-SAUSA300_0808	SAUSA300_0806,SAUSA300_0807,SAUSA300_0808	0	0.837	0	0.394405
SAUSA300_1479-SAUSA300_1480-SAUSA300_1481-SAUSA300_1482	SAUSA300_1479,SAUSA300_1480,SAUSA300_1481,SAUSA300_1482	1	4.843	0.476689	0.397534
nrdG-nrdD	SAUSA300_2550,SAUSA300_2551	2	2.383	1.93756	0.398884
moaA-mobA-moaD-moaE-mobB-moeA	SAUSA300_2219,SAUSA300_2220,SAUSA300_2221,SAUSA300_2222,SAUSA300_2223,SAUSA300_2224	3	4.088	1.69418	0.400382
SAUSA300_2641-SAUSA300_2642	SAUSA300_2641,SAUSA300_2642	0	0.816	0	0.400403
SAUSA300_0440-SAUSA300_0441	SAUSA300_0440,SAUSA300_0441	1	0.87	2.65357	0.400728
SAUSA300_1492-SAUSA300_1493	SAUSA300_1492,SAUSA300_1493	0	0.813	0	0.40127
SAUSA300_1366-cmk	SAUSA300_1366,SAUSA300_1367	0	0.806	0	0.403306
esaA-essA-esaB-essB-essC-esxC-esxB-esaE-esxD-esaD-esaG	SAUSA300_0279,SAUSA300_0280,SAUSA300_0281,SAUSA300_0282,SAUSA300_0283,SAUSA300_0284,SAUSA300_0285,SAUSA300_0286,SAUSA300_0287,SAUSA300_0288,SAUSA300_0289	4	13.608	0.678603	0.405141
SAUSA300_0906-relQ-ppnK-SAUSA300_0909-mgtE-cpaA	SAUSA300_0906,SAUSA300_0907,SAUSA300_0908,SAUSA300_0909,SAUSA300_0910,SAUSA300_0911	4	5.936	1.55566	0.409233
SAUSA300_0295-SAUSA300_0296	SAUSA300_0295,SAUSA300_0296	1	0.888	2.59978	0.409325
SAUSA300_1803-SAUSA300_1804	SAUSA300_1803,SAUSA300_1804	0	0.776	0	0.412201
fruC-scrB	SAUSA300_1993,SAUSA300_1994	2	2.44	1.8923	0.414296
SAUSA300_2129-SAUSA300_2130-SAUSA300_2131	SAUSA300_2129,SAUSA300_2130,SAUSA300_2131	2	2.448	1.88612	0.416466
SAUSA300_1891-SAUSA300_1892	SAUSA300_1891,SAUSA300_1892	0	0.756	0	0.418292
srrB-srrA	SAUSA300_1441,SAUSA300_1442	2	2.457	1.87921	0.418909
bmfBB-bfmBAB-bfmBAA-lpdA	SAUSA300_1464,SAUSA300_1465,SAUSA300_1466,SAUSA300_1467	1	4.699	0.491297	0.419692
dinG-birA-papS-bshA	SAUSA300_1346,SAUSA300_1347,SAUSA300_1348,SAUSA300_1349	4	6.024	1.53294	0.423942
isdI-SAUSA300_0169	SAUSA300_0168,SAUSA300_0169	0	0.716	0	0.430885
argB-argJ-argC-argD	SAUSA300_0184,SAUSA300_0185,SAUSA300_0186,SAUSA300_0187	3	4.287	1.61554	0.440854
rocD-gudB	SAUSA300_0860,SAUSA300_0861	2	2.543	1.81566	0.44236
mupG-murQ-murP-murR	SAUSA300_0192,SAUSA300_0193,SAUSA300_0194,SAUSA300_0195	3	4.295	1.61253	0.4425
SAUSA300_0794-SAUSA300_0795	SAUSA300_0794,SAUSA300_0795	0	0.675	0	0.444397
metN1-metP1-metQ1	SAUSA300_0796,SAUSA300_0797,SAUSA300_0798	2	2.552	1.80925	0.444824
dsbA-SAUSA300_2355	SAUSA300_2354,SAUSA300_2355	1	0.965	2.39234	0.445885
dhaK-dhaL-dhaM-SAUSA300_0639	SAUSA300_0636,SAUSA300_0637,SAUSA300_0638,SAUSA300_0639	2	2.562	1.80219	0.447564
msrA3-SAUSA300_2595	SAUSA300_2594,SAUSA300_2595	1	0.979	2.35813	0.452492
SAUSA300_1010-SAUSA300_1011	SAUSA300_1010,SAUSA300_1011	0	0.651	0	0.452613
menF-menD-menH-menB	SAUSA300_0945,SAUSA300_0946,SAUSA300_0947,SAUSA300_0948	1	4.475	0.51589	0.456486
SAUSA300_1488-SAUSA300_1489	SAUSA300_1488,SAUSA300_1489	0	0.636	0	0.457869
trnaK-trnaQ-trnaY-trnaV-trnaE-trnaN-rrfF	SAUSA300_2116,SAUSA300_2117,SAUSA300_2118,SAUSA300_2119,SAUSA300_2120,SAUSA300_2121,SAUSA300_2122	0	0.631	0	0.459642
parE-parC	SAUSA300_1250,SAUSA300_1251	3	4.399	1.57441	0.464024
SAUSA300_0842-sufA	SAUSA300_0842,SAUSA300_0843	0	0.608	0	0.467942
sdaAA-sdaAB-SAUSA300_2471	SAUSA300_2469,SAUSA300_2470,SAUSA300_2471	2	2.639	1.74961	0.468725
vraF-vraG	SAUSA300_0647,SAUSA300_0648	2	2.64	1.74894	0.469001
murC-ftsK-SAUSA300_1688-SAUSA300_1689-SAUSA300_1690-SAUSA300_1691	SAUSA300_1686,SAUSA300_1687,SAUSA300_1688,SAUSA300_1689,SAUSA300_1690,SAUSA300_1691	5	8.216	1.40495	0.470385
trnaE-trnaN-trnaG-trnaH-trnaF-trnaD-trnaM	SAUSA300_1773,SAUSA300_1774,SAUSA300_1775,SAUSA300_1776,SAUSA300_1777,SAUSA300_1778,SAUSA300_1779	0	0.599	0	0.471255
SAUSA300_0271-SAUSA300_0272-SAUSA300_0273-SAUSA300_0274	SAUSA300_0271,SAUSA300_0272,SAUSA300_0273,SAUSA300_0274	1	4.347	0.53108	0.478848
SAUSA300_1303-SAUSA300_1304	SAUSA300_1303,SAUSA300_1304	1	1.041	2.21768	0.481593
SAUSA300_0778-SAUSA300_0779	SAUSA300_0778,SAUSA300_0779	0	0.564	0	0.484508
pykA-pfkA	SAUSA300_1644,SAUSA300_1645	2	2.702	1.70881	0.486115
ctsR-mcsA-mcsB-clpC	SAUSA300_0507,SAUSA300_0508,SAUSA300_0509,SAUSA300_0510	3	4.513	1.53464	0.487856
SAUSA300_1483-SAUSA300_1484-SAUSA300_1485-SAUSA300_1486	SAUSA300_1483,SAUSA300_1484,SAUSA300_1485,SAUSA300_1486	1	4.245	0.543841	0.497397
SAUSA300_1669-serA	SAUSA300_1669,SAUSA300_1670	2	2.751	1.67838	0.499678
SAUSA300_2401-SAUSA300_2402	SAUSA300_2401,SAUSA300_2402	0	0.523	0	0.500835
SAUSA300_2352-SAUSA300_2353	SAUSA300_2352,SAUSA300_2353	0	0.517	0	0.503302
SAUSA300_2042-SAUSA300_2043	SAUSA300_2042,SAUSA300_2043	0	0.514	0	0.504543
metS-SAUSA300_0468	SAUSA300_0467,SAUSA300_0468	2	2.777	1.66266	0.506887
SAUSA300_0804-SAUSA300_0805	SAUSA300_0804,SAUSA300_0805	0	0.507	0	0.50746
lysC-asd-dapA-dapB-dapD	SAUSA300_1286,SAUSA300_1287,SAUSA300_1288,SAUSA300_1289,SAUSA300_1290	3	4.612	1.5017	0.50873
SAUSA300_0324-gcvH-L-SAUSA300_0326-sirTM-lplA2	SAUSA300_0324,SAUSA300_0325,SAUSA300_0326,SAUSA300_0327,SAUSA300_0328	1	4.102	0.5628	0.524532
cidC-cidB-cidA	SAUSA300_2477,SAUSA300_2478,SAUSA300_2479	2	2.863	1.61272	0.530778
SAUSA300_0607-SAUSA300_0608	SAUSA300_0607,SAUSA300_0608	0	0.444	0	0.535098
ptpB-SAUSA300_2070-prmC-prfA-tdk	SAUSA300_2069,SAUSA300_2070,SAUSA300_2071,SAUSA300_2072,SAUSA300_2073	1	4.045	0.570731	0.535726
SAUSA300_2616-SAUSA300_2617-SAUSA300_2618-SAUSA300_2619	SAUSA300_2616,SAUSA300_2617,SAUSA300_2618,SAUSA300_2619	1	4.026	0.573424	0.539507
mraZ-mraW-ftsL-pbp1	SAUSA300_1072,SAUSA300_1073,SAUSA300_1074,SAUSA300_1075	1	4.012	0.575425	0.542308
yjbH-SAUSA300_0904	SAUSA300_0903,SAUSA300_0904	1	1.194	1.93351	0.552174
SAUSA300_2575-manP-pmi	SAUSA300_2575,SAUSA300_2576,SAUSA300_2577	3	4.855	1.42653	0.56053
gcvPB-gcvPA-gcvT	SAUSA300_1496,SAUSA300_1497,SAUSA300_1498	1	3.922	0.58863	0.560641
folC-valS	SAUSA300_1610,SAUSA300_1611	1	3.914	0.589833	0.562298
SAUSA300_0674-SAUSA300_0675	SAUSA300_0674,SAUSA300_0675	1	1.23	1.87692	0.568505
SAUSA300_1733-rppH	SAUSA300_1733,SAUSA300_1734	1	1.23	1.87692	0.568505
rplGB-rpsL-rpsG-fusA-tuf	SAUSA300_0529,SAUSA300_0530,SAUSA300_0531,SAUSA300_0532,SAUSA300_0533	3	4.907	1.41142	0.571698
pyrP-pyrB-pyrC-carA-carB-pyrF-pyrE-SAUSA300_1099	SAUSA300_1092,SAUSA300_1093,SAUSA300_1094,SAUSA300_1095,SAUSA300_1096,SAUSA300_1097,SAUSA300_1098,SAUSA300_1099	3	9.431	0.734367	0.571768
SAUSA300_1581-csbD	SAUSA300_1581,SAUSA300_1582	0	0.368	0	0.572304
SAUSA300_0826-SAUSA300_0827-SAUSA300_0828	SAUSA300_0826,SAUSA300_0827,SAUSA300_0828	2	3.034	1.52182	0.578403
sstA-sstB-sstC-sstD	SAUSA300_0718,SAUSA300_0719,SAUSA300_0720,SAUSA300_0721	1	3.819	0.604505	0.582324
gpsB-SAUSA300_1338-SAUSA300_1339	SAUSA300_1337,SAUSA300_1338,SAUSA300_1339	1	1.264	1.82643	0.583827
psmβ1-psmβ2	SAUSA300_1067,SAUSA300_1068	0	0.325	0	0.595666
SAUSA300_1081-SAUSA300_1082-sepF-SAUSA300_1084-SAUSA300_1085-SAUSA300_1086	SAUSA300_1081,SAUSA300_1082,SAUSA300_1083,SAUSA300_1084,SAUSA300_1085,SAUSA300_1086	1	3.749	0.615793	0.597498
SAUSA300_0146-SAUSA300_0147	SAUSA300_0146,SAUSA300_0147	2	3.13	1.47515	0.605151
SAUSA300_1572-SAUSA300_1573-SAUSA300_1574-alaS	SAUSA300_1572,SAUSA300_1573,SAUSA300_1574,SAUSA300_1575	1	3.708	0.622602	0.606553
htrA2-ktrD	SAUSA300_0923,SAUSA300_0924	1	3.684	0.626658	0.611912
SAUSA300_0704-recQ1	SAUSA300_0704,SAUSA300_0705	1	3.676	0.628021	0.613708
SAUSA300_0609-mnhA2-mnhB2-mnhC2-mnhD2-mnhE2-mnhF2-mnhG2	SAUSA300_0609,SAUSA300_0610,SAUSA300_0611,SAUSA300_0612,SAUSA300_0613,SAUSA300_0614,SAUSA300_0615,SAUSA300_0616	2	6.414	0.719865	0.622182
isdC-isdD-isdE-isdF	SAUSA300_1030,SAUSA300_1031,SAUSA300_1032,SAUSA300_1033	1	3.612	0.639149	0.628251
mraY-murD-divIB-ftsA-ftsZ	SAUSA300_1076,SAUSA300_1077,SAUSA300_1078,SAUSA300_1079,SAUSA300_1080	2	6.374	0.724382	0.629205
lacG-lacE-lacF-lacD-lacC-lacB-lacA	SAUSA300_2149,SAUSA300_2150,SAUSA300_2151,SAUSA300_2152,SAUSA300_2153,SAUSA300_2154,SAUSA300_2155	2	6.369	0.724951	0.630088
asp23-SAUSA300_2143-amaP	SAUSA300_2142,SAUSA300_2143,SAUSA300_2144	1	1.372	1.68266	0.631813
mreD-mreC	SAUSA300_1604,SAUSA300_1605	1	1.372	1.68266	0.631813
galM-SAUSA300_2286	SAUSA300_2285,SAUSA300_2286	1	1.375	1.67899	0.63313
queF-SAUSA300_0714	SAUSA300_0713,SAUSA300_0714	1	1.386	1.66566	0.637955
aroA-aroB-aroC	SAUSA300_1355,SAUSA300_1356,SAUSA300_1357	1	3.564	0.647757	0.639363
pmtD-pmtC-pmtB-pmtA-pmtR	SAUSA300_1910,SAUSA300_1911,SAUSA300_1912,SAUSA300_1913,SAUSA300_1914	1	3.563	0.647939	0.639597
SAUSA300_2168-SAUSA300_2169-SAUSA300_2170	SAUSA300_2168,SAUSA300_2169,SAUSA300_2170	1	3.563	0.647939	0.639597
nrdI-nrdE-nrdF	SAUSA300_0715,SAUSA300_0716,SAUSA300_0717	1	3.555	0.649397	0.641467
ssuB-ssuA-ssuC-SAUSA300_0177	SAUSA300_0174,SAUSA300_0175,SAUSA300_0176,SAUSA300_0177	1	3.53	0.653996	0.647343
rpoB-rpoC	SAUSA300_0527,SAUSA300_0528	4	7.311	1.26309	0.652083
SAUSA300_1851-SAUSA300_1852-SAUSA300_1853-recX	SAUSA300_1851,SAUSA300_1852,SAUSA300_1853,SAUSA300_1854	1	3.487	0.662061	0.657564
SAUSA300_1462-SAUSA300_1463	SAUSA300_1462,SAUSA300_1463	1	1.431	1.61328	0.657574
fadA-fadB	SAUSA300_0225,SAUSA300_0226	1	3.475	0.664347	0.660443
rnmV-ksgA	SAUSA300_0469,SAUSA300_0470	1	1.44	1.6032	0.661475
SAUSA300_0429-SAUSA300_0430	SAUSA300_0429,SAUSA300_0430	1	1.445	1.59765	0.663639
pheS-pheT	SAUSA300_1037,SAUSA300_1038	1	3.46	0.667227	0.664057
vraD-vraE-SAUSA300_2635-SAUSA300_2636	SAUSA300_2633,SAUSA300_2634,SAUSA300_2635,SAUSA300_2636	1	3.46	0.667227	0.664057
pdxS-pdxT	SAUSA300_0504,SAUSA300_0505	1	1.451	1.59105	0.666233
kdpD-kdpE	SAUSA300_2035,SAUSA300_2036	2	3.352	1.37745	0.666825
hemY-hemH-hemE	SAUSA300_1781,SAUSA300_1782,SAUSA300_1783	1	3.442	0.670717	0.668418
SAUSA300_2519-SAUSA300_2520-SAUSA300_2521	SAUSA300_2519,SAUSA300_2520,SAUSA300_2521	1	3.428	0.673456	0.671828
SAUSA300_2453-SAUSA300_2454	SAUSA300_2453,SAUSA300_2454	1	1.467	1.57369	0.673132
rrfC-trnaA	SAUSA300_0497,SAUSA300_0498	0	0.202	0	0.675702
tarI'-tarJ'-tarL'	SAUSA300_0245,SAUSA300_0246,SAUSA300_0247	1	3.408	0.677408	0.676727
phoU-pstB-pstA-pstC	SAUSA300_1279,SAUSA300_1280,SAUSA300_1281,SAUSA300_1282	2	3.391	1.36161	0.677613
SAUSA300_1884-ligA-pcrA-pcrB	SAUSA300_1884,SAUSA300_1885,SAUSA300_1886,SAUSA300_1887	2	6.1	0.75692	0.679002
trnaL-SAUSA300_1812	SAUSA300_1811,SAUSA300_1812	0	0.196	0	0.680284
SAUSA300_1018-SAUSA300_1019	SAUSA300_1018,SAUSA300_1019	1	1.487	1.55253	0.681722
SAUSA300_0879-SAUSA300_0880-SAUSA300_0881-SAUSA300_0882	SAUSA300_0879,SAUSA300_0880,SAUSA300_0881,SAUSA300_0882	1	3.38	0.68302	0.683639
SAUSA300_2257-fdhA	SAUSA300_2257,SAUSA300_2258	2	3.427	1.3473	0.687555
SAUSA300_1706-SAUSA300_1707	SAUSA300_1706,SAUSA300_1707	1	1.513	1.52585	0.69283
trnaG-trnaL	SAUSA300_2018,SAUSA300_2019	0	0.178	0	0.694544
glpK-glpD	SAUSA300_1192,SAUSA300_1193	1	3.327	0.6939	0.696898
SAUSA300_1839-SAUSA300_1840	SAUSA300_1839,SAUSA300_1840	0	0.17	0	0.701149
SAUSA300_1561-pxpA-SAUSA300_1563-SAUSA300_1564-SAUSA300_1565-SAUSA300_1566	SAUSA300_1561,SAUSA300_1562,SAUSA300_1563,SAUSA300_1564,SAUSA300_1565,SAUSA300_1566	3	5.521	1.25445	0.704575
sufC-sufD-sufS-sufU-sufB	SAUSA300_0818,SAUSA300_0819,SAUSA300_0820,SAUSA300_0821,SAUSA300_0822	3	5.524	1.25377	0.705225
trnaS-trnaN	SAUSA300_0926,SAUSA300_0927	0	0.165	0	0.705368
crtN-crtM-crtQ-crtP-crtO	SAUSA300_2498,SAUSA300_2499,SAUSA300_2500,SAUSA300_2501,SAUSA300_2502	3	5.527	1.25309	0.705875
ssl13-ssl14	SAUSA300_1060,SAUSA300_1061	1	1.545	1.49424	0.706412
dapI-alr2-lysA	SAUSA300_1291,SAUSA300_1292,SAUSA300_1293	2	3.496	1.32071	0.706562
hptR-hptS-hptA	SAUSA300_0217,SAUSA300_0218,SAUSA300_0219	1	3.272	0.705564	0.710902
opp-2F-opp-2D-opp-2C-opp-2B	SAUSA300_1273,SAUSA300_1274,SAUSA300_1275,SAUSA300_1276	1	3.263	0.70751	0.713218
SAUSA300_2374-SAUSA300_2375	SAUSA300_2374,SAUSA300_2375	2	3.521	1.31134	0.713431
hepT-ubiE	SAUSA300_1359,SAUSA300_1360	1	1.563	1.47704	0.714008
trnaE-trnaD	SAUSA300_0018,SAUSA300_0019	0	0.154	0	0.714915
SAUSA300_2431-SAUSA300_2432	SAUSA300_2431,SAUSA300_2432	1	3.255	0.709249	0.715282
SAUSA300_0311-psuG-SAUSA300_0313	SAUSA300_0311,SAUSA300_0312,SAUSA300_0313	1	3.247	0.710997	0.717351
sdhC-sdhA-sdhB	SAUSA300_1046,SAUSA300_1047,SAUSA300_1048	1	3.247	0.710997	0.717351
opp-4A-opp-4D-opp-4F-opp-4B-opp-4C	SAUSA300_0892,SAUSA300_0893,SAUSA300_0894,SAUSA300_0895,SAUSA300_0896	3	5.583	1.24052	0.718005
lytH-dtd-relA	SAUSA300_1588,SAUSA300_1589,SAUSA300_1590	2	3.546	1.30209	0.720289
rplY-pth-mfd-SAUSA300_0482-SAUSA300_0483-SAUSA300_0484-divIC	SAUSA300_0479,SAUSA300_0480,SAUSA300_0481,SAUSA300_0482,SAUSA300_0483,SAUSA300_0484,SAUSA300_0485	3	8.421	0.822446	0.725635
SAUSA300_2322-cobI	SAUSA300_2322,SAUSA300_2323	1	1.613	1.43125	0.734941
SAUSA300_0212-SAUSA300_0213-SAUSA300_0214	SAUSA300_0212,SAUSA300_0213,SAUSA300_0214	1	3.164	0.729648	0.739141
opp-3B-opp-3C-opp-3D-opp-3F-opp-3A	SAUSA300_0887,SAUSA300_0888,SAUSA300_0889,SAUSA300_0890,SAUSA300_0891	3	5.7	1.21506	0.743307
fruR-fruB-fruA	SAUSA300_0683,SAUSA300_0684,SAUSA300_0685	2	3.642	1.26777	0.746528
glmM-SAUSA300_2112-dacA	SAUSA300_2111,SAUSA300_2112,SAUSA300_2113	1	3.125	0.738754	0.749582
SAUSA300_2246-sarY-SAUSA300_2248	SAUSA300_2246,SAUSA300_2247,SAUSA300_2248	1	3.114	0.741364	0.752551
mtaB-rsmE-prmA-dnaJ-dnaK-grpE-hrcA	SAUSA300_1536,SAUSA300_1537,SAUSA300_1538,SAUSA300_1539,SAUSA300_1540,SAUSA300_1541,SAUSA300_1542	4	7.86	1.17486	0.752922
holA-comEC-comEB	SAUSA300_1546,SAUSA300_1547,SAUSA300_1548	2	3.668	1.25878	0.753605
mnhG-mnhF-mnhE-mnhD-mnhC-mnhB-mnhA	SAUSA300_0849,SAUSA300_0850,SAUSA300_0851,SAUSA300_0852,SAUSA300_0853,SAUSA300_0854,SAUSA300_0855	3	5.764	1.20156	0.757117
capA-capB-capC-capD-capE-capF-capG-capH-capI-capJ-capK-capL-capM-capN-capO-capP	SAUSA300_0152,SAUSA300_0153,SAUSA300_0154,SAUSA300_0155,SAUSA300_0156,SAUSA300_0157,SAUSA300_0158,SAUSA300_0159,SAUSA300_0160,SAUSA300_0161,SAUSA300_0162,SAUSA300_0163,SAUSA300_0164,SAUSA300_0165,SAUSA300_0166,SAUSA300_0167	8	16.569	1.11466	0.761582
SAUSA300_1342-nth-dnaD	SAUSA300_1342,SAUSA300_1343,SAUSA300_1344	1	1.681	1.37335	0.763011
cysE-cysS-mrnC-SAUSA300_0517-SAUSA300_0518	SAUSA300_0514,SAUSA300_0515,SAUSA300_0516,SAUSA300_0517,SAUSA300_0518	2	3.706	1.24588	0.763924
tagG-tagB-tagX	SAUSA300_0625,SAUSA300_0626,SAUSA300_0627	1	3.072	0.751499	0.763983
SAUSA300_1314-crr-msrB-msrA1	SAUSA300_1314,SAUSA300_1315,SAUSA300_1316,SAUSA300_1317	1	1.687	1.36847	0.765466
aspS-hisS	SAUSA300_1586,SAUSA300_1587	1	3.044	0.758412	0.77169
pflB-pflA	SAUSA300_0220,SAUSA300_0221	1	3.027	0.762671	0.776403
SAUSA300_1351-SAUSA300_1352-SAUSA300_1353-SAUSA300_1354	SAUSA300_1351,SAUSA300_1352,SAUSA300_1353,SAUSA300_1354	1	3.021	0.764186	0.778072
hrtA-htrB	SAUSA300_2306,SAUSA300_2307	1	1.72	1.34221	0.778902
yajC-tgt-queA-ruvB-ruvA-thrR-obgE	SAUSA300_1594,SAUSA300_1595,SAUSA300_1596,SAUSA300_1597,SAUSA300_1598,SAUSA300_1599,SAUSA300_1600	3	5.88	1.17786	0.782081
mvaK1-mvaD-mvaK2	SAUSA300_0572,SAUSA300_0573,SAUSA300_0574	1	2.997	0.770306	0.784782
SAUSA300_1215-cls1	SAUSA300_1215,SAUSA300_1216	1	1.736	1.32984	0.785376
htsC-htsB-htsA	SAUSA300_2134,SAUSA300_2135,SAUSA300_2136	1	2.991	0.771851	0.786467
SAUSA300_0308-SAUSA300_0309	SAUSA300_0308,SAUSA300_0309	1	1.739	1.32755	0.786588
SAUSA300_1607-radC-comC	SAUSA300_1607,SAUSA300_1608,SAUSA300_1609	1	1.742	1.32526	0.787798
SAUSA300_0132-SAUSA300_0133-SAUSA300_0134	SAUSA300_0132,SAUSA300_0133,SAUSA300_0134	2	3.805	1.21346	0.790665
SAUSA300_0748-SAUSA300_0749-whiA	SAUSA300_0748,SAUSA300_0749,SAUSA300_0750	1	2.957	0.780726	0.796079
SAUSA300_0938-tarM	SAUSA300_0938,SAUSA300_0939	1	1.774	1.30136	0.800651
recO-era-cdd-dgkA-ybeY-phoH	SAUSA300_1526,SAUSA300_1527,SAUSA300_1528,SAUSA300_1529,SAUSA300_1530,SAUSA300_1531	2	3.851	1.19896	0.803015
SAUSA300_0934-SAUSA300_0935-SAUSA300_0936	SAUSA300_0934,SAUSA300_0935,SAUSA300_0936	1	2.925	0.789267	0.805219
SAUSA300_0003-recF-gyrB-gyrA	SAUSA300_0003,SAUSA300_0004,SAUSA300_0005,SAUSA300_0006	3	5.998	1.15469	0.807365
rasP-proS	SAUSA300_1155,SAUSA300_1156	1	2.907	0.794154	0.810402
accA-accD	SAUSA300_1646,SAUSA300_1647	1	1.801	1.28185	0.811415
SAUSA300_0464-SAUSA300_0465-rsmI	SAUSA300_0464,SAUSA300_0465,SAUSA300_0466	1	1.807	1.27759	0.813797
spoIIIE-SAUSA300_1170-SAUSA300_1171-SAUSA300_1172-SAUSA300_1173-SAUSA300_1174-SAUSA300_1175-pgsA	SAUSA300_1169,SAUSA300_1170,SAUSA300_1171,SAUSA300_1172,SAUSA300_1173,SAUSA300_1174,SAUSA300_1175,SAUSA300_1176	4	8.202	1.12587	0.815588
SAUSA300_0998-potA-potB-potC-potD-SAUSA300_1003	SAUSA300_0998,SAUSA300_0999,SAUSA300_1000,SAUSA300_1001,SAUSA300_1002,SAUSA300_1003	2	5.417	0.852356	0.816135
rpsB-tsf	SAUSA300_1149,SAUSA300_1150	1	1.83	1.26153	0.822893
tilS-hprT	SAUSA300_0487,SAUSA300_0488	1	1.839	1.25536	0.826439
qoxD-qoxC-qoxB-qoxA	SAUSA300_0960,SAUSA300_0961,SAUSA300_0962,SAUSA300_0963	2	3.97	1.16303	0.834727
SAUSA300_2377-SAUSA300_2378	SAUSA300_2377,SAUSA300_2378	1	1.861	1.24052	0.83507
SAUSA300_1321-cvfC-SAUSA300_1323	SAUSA300_1321,SAUSA300_1322,SAUSA300_1323	1	1.866	1.2372	0.837024
gtfB-gtfA-secA2-asp3-asp2-asp1-secY2	SAUSA300_2582,SAUSA300_2583,SAUSA300_2584,SAUSA300_2585,SAUSA300_2586,SAUSA300_2587,SAUSA300_2588	5	10.527	1.09652	0.838598
bioX-bioW-bioF-bioB-bioA-bioD	SAUSA300_2368,SAUSA300_2369,SAUSA300_2370,SAUSA300_2371,SAUSA300_2372,SAUSA300_2373	2	5.305	0.870351	0.840398
SAUSA300_1698-SAUSA300_1699-SAUSA300_1700	SAUSA300_1698,SAUSA300_1699,SAUSA300_1700	1	2.792	0.826865	0.844208
dnaI-dnaB-nrdR	SAUSA300_1630,SAUSA300_1631,SAUSA300_1632	1	2.791	0.827161	0.844507
thiX-thiW-thiV	SAUSA300_0977,SAUSA300_0978,SAUSA300_0979	1	2.789	0.827754	0.845106
sfnaC-sfnaB-sfnaA	SAUSA300_2137,SAUSA300_2138,SAUSA300_2139	2	4.014	1.15028	0.84636
lukD-lukE	SAUSA300_1768,SAUSA300_1769	1	1.92	1.2024	0.857974
hlgC-hlgB	SAUSA300_2366,SAUSA300_2367	1	1.926	1.19865	0.860283
folE2-bshB2-SAUSA300_0553	SAUSA300_0551,SAUSA300_0552,SAUSA300_0553	1	1.932	1.19493	0.862589
dltA-dltB-dltC-dltD	SAUSA300_0835,SAUSA300_0836,SAUSA300_0837,SAUSA300_0838	2	4.094	1.1278	0.867376
SAUSA300_1301-SAUSA300_1302	SAUSA300_1301,SAUSA300_1302	1	2.691	0.857899	0.874908
trpE-trpG-trpD-trpC-trpF-trpB-trpA	SAUSA300_1262,SAUSA300_1263,SAUSA300_1264,SAUSA300_1265,SAUSA300_1266,SAUSA300_1267,SAUSA300_1268	3	6.317	1.09638	0.874992
hom-thrC-thrB-SAUSA300_1229	SAUSA300_1226,SAUSA300_1227,SAUSA300_1228,SAUSA300_1229	2	4.124	1.1196	0.875211
malA-malR	SAUSA300_1456,SAUSA300_1457	1	2.684	0.860137	0.877072
coaE-mutM-polA	SAUSA300_1634,SAUSA300_1635,SAUSA300_1636	2	4.157	1.11071	0.883799
sspC-sspB-sspA	SAUSA300_0949,SAUSA300_0950,SAUSA300_0951	1	2.64	0.874472	0.890775
comEA-SAUSA300_1550-rsfS-SAUSA300_1552-nadD-SAUSA300_1554-aroE-SAUSA300_1556-SAUSA300_1557-mtnN	SAUSA300_1549,SAUSA300_1550,SAUSA300_1551,SAUSA300_1552,SAUSA300_1553,SAUSA300_1554,SAUSA300_1555,SAUSA300_1556,SAUSA300_1557,SAUSA300_1558	3	6.393	1.08334	0.890916
arlS-arlR	SAUSA300_1307,SAUSA300_1308	1	2.011	1.14799	0.892605
mpsA-mpsB	SAUSA300_0425,SAUSA300_0426	2	4.202	1.09881	0.895458
ureA-ureB-ureC-ureE-ureF-ureG-ureD	SAUSA300_2238,SAUSA300_2239,SAUSA300_2240,SAUSA300_2241,SAUSA300_2242,SAUSA300_2243,SAUSA300_2244	2	5.048	0.914662	0.897933
fni-corA	SAUSA300_2292,SAUSA300_2293	1	2.027	1.13893	0.898607
gatD-murT	SAUSA300_1872,SAUSA300_1873	1	2.046	1.12835	0.9057
emrB-SAUSA300_2299	SAUSA300_2298,SAUSA300_2299	1	2.591	0.89101	0.906254
arsR-arsB-arsC	SAUSA300_1717,SAUSA300_1718,SAUSA300_1719	1	2.052	1.12505	0.907933
SAUSA300_0338-SAUSA300_0339-SAUSA300_0340	SAUSA300_0338,SAUSA300_0339,SAUSA300_0340	1	2.581	0.894462	0.909441
SAUSA300_0201-SAUSA300_0202-SAUSA300_0203-ggt	SAUSA300_0201,SAUSA300_0202,SAUSA300_0203,SAUSA300_0204	3	6.483	1.0683	0.909667
femA-femB	SAUSA300_1269,SAUSA300_1270	1	2.579	0.895156	0.910079
nhaC-SAUSA300_2251	SAUSA300_2250,SAUSA300_2251	1	2.577	0.89585	0.910718
rplQ-rpoA-rpsK-rpsM-rpmJ-infA	SAUSA300_2177,SAUSA300_2178,SAUSA300_2179,SAUSA300_2180,SAUSA300_2181,SAUSA300_2182	1	2.568	0.89899	0.913598
SAUSA300_0105-norC	SAUSA300_0105,SAUSA300_0106	1	2.568	0.89899	0.913598
metN2-metP2-metQ2	SAUSA300_0435,SAUSA300_0436,SAUSA300_0437	1	2.567	0.89934	0.913919
modC-modB-modA	SAUSA300_2228,SAUSA300_2229,SAUSA300_2230	1	2.073	1.11365	0.915718
kdpC-kdpB-kdpA	SAUSA300_2032,SAUSA300_2033,SAUSA300_2034	2	4.302	1.07327	0.921147
sucC-sucD	SAUSA300_1138,SAUSA300_1139	1	2.096	1.10143	0.924192
zapA-SAUSA300_1041-polX-mutS2	SAUSA300_1040,SAUSA300_1041,SAUSA300_1042,SAUSA300_1043	2	4.931	0.936364	0.924971
def2-fmt-sun-rlmN-stp1-pknB	SAUSA300_1108,SAUSA300_1109,SAUSA300_1110,SAUSA300_1111,SAUSA300_1112,SAUSA300_1113	3	6.558	1.05609	0.925199
xpt-pbuX-guaB-guaA	SAUSA300_0386,SAUSA300_0387,SAUSA300_0388,SAUSA300_0389	2	4.916	0.939222	0.928474
ahpF-ahpC	SAUSA300_0379,SAUSA300_0380	1	2.108	1.09516	0.928592
SAUSA300_1332-dynA	SAUSA300_1332,SAUSA300_1333	2	4.338	1.06436	0.930319
mntC-mntB-mntA	SAUSA300_0618,SAUSA300_0619,SAUSA300_0620	1	2.499	0.923812	0.935939
cap1C-cap1B-cap1A	SAUSA300_2596,SAUSA300_2597,SAUSA300_2598	1	2.135	1.08131	0.93844
adk-secY-rplO-rpmD-rpsE-rplR-rplF-rpsH-rpsN-rplE-rplX-rplN-rpsQ-rpmC-rplP-rpsC-rplV-rpsS-rplB-rplW-rplD-rplC-rpsJ	SAUSA300_2183,SAUSA300_2184,SAUSA300_2185,SAUSA300_2186,SAUSA300_2187,SAUSA300_2188,SAUSA300_2189,SAUSA300_2190,SAUSA300_2191,SAUSA300_2192,SAUSA300_2193,SAUSA300_2194,SAUSA300_2195,SAUSA300_2196,SAUSA300_2197,SAUSA300_2198,SAUSA300_2199,SAUSA300_2200,SAUSA300_2201,SAUSA300_2202,SAUSA300_2203,SAUSA300_2204,SAUSA300_2205	5	11.154	1.03488	0.938999
purE-purK-purC-purS-purQ-purL-purF-purM-purN-purH-purD	SAUSA300_0966,SAUSA300_0967,SAUSA300_0968,SAUSA300_0969,SAUSA300_0970,SAUSA300_0971,SAUSA300_0972,SAUSA300_0973,SAUSA300_0974,SAUSA300_0975,SAUSA300_0976	5	11.171	1.0333	0.941689
rimP-nusA-SAUSA300_1160-SAUSA300_1161-infB	SAUSA300_1158,SAUSA300_1159,SAUSA300_1160,SAUSA300_1161,SAUSA300_1162	2	4.404	1.04841	0.947026
radA-SAUSA300_0512	SAUSA300_0511,SAUSA300_0512	1	2.462	0.937696	0.948109
lpl1-SAUSA300_0411-SAUSA300_0412	SAUSA300_0410,SAUSA300_0411,SAUSA300_0412	1	2.46	0.938458	0.94877
rsgA-cfxE-thiN	SAUSA300_1114,SAUSA300_1115,SAUSA300_1116	1	2.168	1.06486	0.950375
nanT-nanA	SAUSA300_0314,SAUSA300_0315	1	2.453	0.941136	0.951089
glnQ-SAUSA300_1808	SAUSA300_1807,SAUSA300_1808	1	2.172	1.06289	0.951814
murF-ddl	SAUSA300_2038,SAUSA300_2039	1	2.443	0.944988	0.95441
citC-citZ	SAUSA300_1640,SAUSA300_1641	1	2.438	0.946926	0.956075
SAUSA300_0013-gdpP-rplI-dnaC	SAUSA300_0013,SAUSA300_0014,SAUSA300_0015,SAUSA300_0016	2	4.795	0.962922	0.957047
lytN-fmhC	SAUSA300_1140,SAUSA300_1141	1	2.423	0.952788	0.961082
lpl3-lpl4-lpl5	SAUSA300_0413,SAUSA300_0414,SAUSA300_0415	1	2.415	0.955945	0.963761
SAUSA300_0350-SAUSA300_0351-SAUSA300_0352-SAUSA300_0353	SAUSA300_0350,SAUSA300_0351,SAUSA300_0352,SAUSA300_0353	1	2.409	0.958326	0.965775
malK-malE-malF-SAUSA300_0211	SAUSA300_0208,SAUSA300_0209,SAUSA300_0210,SAUSA300_0211	2	4.493	1.02765	0.969327
comFA-comFC-saHPF	SAUSA300_0734,SAUSA300_0735,SAUSA300_0736	1	2.382	0.969188	0.974882
ackA-SAUSA300_1658	SAUSA300_1657,SAUSA300_1658	1	2.237	1.03201	0.974976
hprK-lgt-SAUSA300_0745-SAUSA300_0746-trxB	SAUSA300_0743,SAUSA300_0744,SAUSA300_0745,SAUSA300_0746,SAUSA300_0747	2	4.719	0.97843	0.975269
nfo-cshB	SAUSA300_1517,SAUSA300_1518	1	2.246	1.02787	0.978149
phoR-phoP	SAUSA300_1638,SAUSA300_1639	1	2.365	0.976155	0.980652
SAUSA300_0591-SAUSA300_0592-SAUSA300_0593	SAUSA300_0591,SAUSA300_0592,SAUSA300_0593	1	2.36	0.978223	0.982355
walR-walK-walH-walI	SAUSA300_0020,SAUSA300_0021,SAUSA300_0022,SAUSA300_0023	2	4.656	0.991669	0.990532
pabA-pabB-SAUSA300_0700	SAUSA300_0698,SAUSA300_0699,SAUSA300_0700	1	2.336	0.988273	0.990562
SAUSA300_0458-tmk-pstA	SAUSA300_0458,SAUSA300_0459,SAUSA300_0460	1	2.313	0.9981	0.998481

## Sheet: type C>I
Operon enrichment analysis (type C>I variants)
OPERON	operon_gene_list	n_mutations	operon_length	enrichment	glm.pval
agrB-agrD-agrC-agrA	SAUSA300_1989,SAUSA300_1990,SAUSA300_1991,SAUSA300_1992	9	2.758	21.2308	6.43314e-10
ung-SAUSA300_0564	SAUSA300_0563,SAUSA300_0564	2	1.037	12.5479	0.01108
holA-comEC-comEB	SAUSA300_1546,SAUSA300_1547,SAUSA300_1548	3	3.668	5.32122	0.0227837
def2-fmt-sun-rlmN-stp1-pknB	SAUSA300_1108,SAUSA300_1109,SAUSA300_1110,SAUSA300_1111,SAUSA300_1112,SAUSA300_1113	4	6.558	3.96833	0.0241506
sucB-sucA	SAUSA300_1305,SAUSA300_1306	3	4.08	4.78388	0.0306675
mepR-mepA	SAUSA300_0334,SAUSA300_0335	2	1.881	6.91767	0.0374924
psmβ1-psmβ2	SAUSA300_1067,SAUSA300_1068	1	0.325	20.0187	0.0429505
gpsA-engA	SAUSA300_1363,SAUSA300_1364	2	2.325	5.59662	0.0572371
SAUSA300_pUSA030010-SAUSA300_pUSA030011-SAUSA300_pUSA030012-SAUSA300_pUSA030013-SAUSA300_pUSA030014-SAUSA300_pUSA030015-SAUSA300_pUSA030016-SAUSA300_pUSA030017-SAUSA300_pUSA030018-SAUSA300_pUSA030019-SAUSA300_pUSA030020	SAUSA300_pUSA030010,SAUSA300_pUSA030011,SAUSA300_pUSA030012,SAUSA300_pUSA030013,SAUSA300_pUSA030014,SAUSA300_pUSA030015,SAUSA300_pUSA030016,SAUSA300_pUSA030017,SAUSA300_pUSA030018,SAUSA300_pUSA030019,SAUSA300_pUSA030020	0	11.594	0	0.0585297
budA1-budB	SAUSA300_2165,SAUSA300_2166	2	2.405	5.41046	0.0611922
SAUSA300_0105-norC	SAUSA300_0105,SAUSA300_0106	2	2.568	5.06703	0.0696096
crtN-crtM-crtQ-crtP-crtO	SAUSA300_2498,SAUSA300_2499,SAUSA300_2500,SAUSA300_2501,SAUSA300_2502	3	5.527	3.53143	0.0696853
vraF-vraG	SAUSA300_0647,SAUSA300_0648	2	2.64	4.92884	0.0734778
sigB-rsbW-rsbV-rsbU	SAUSA300_2022,SAUSA300_2023,SAUSA300_2024,SAUSA300_2025	2	2.672	4.86981	0.0752259
malA-malR	SAUSA300_1456,SAUSA300_1457	2	2.684	4.84804	0.0758861
mnhG-mnhF-mnhE-mnhD-mnhC-mnhB-mnhA	SAUSA300_0849,SAUSA300_0850,SAUSA300_0851,SAUSA300_0852,SAUSA300_0853,SAUSA300_0854,SAUSA300_0855	3	5.764	3.38623	0.0777821
SAUSA300_0778-SAUSA300_0779	SAUSA300_0778,SAUSA300_0779	1	0.564	11.5356	0.0798453
recU-pbp2	SAUSA300_1340,SAUSA300_1341	2	2.806	4.63726	0.0827367
vraA-vraB-vraC	SAUSA300_0559,SAUSA300_0560,SAUSA300_0561	2	2.857	4.55448	0.0856746
SAUSA300_0842-sufA	SAUSA300_0842,SAUSA300_0843	1	0.608	10.7008	0.0868787
SAUSA300_0826-SAUSA300_0827-SAUSA300_0828	SAUSA300_0826,SAUSA300_0827,SAUSA300_0828	2	3.034	4.28878	0.0962016
rplY-pth-mfd-SAUSA300_0482-SAUSA300_0483-SAUSA300_0484-divIC	SAUSA300_0479,SAUSA300_0480,SAUSA300_0481,SAUSA300_0482,SAUSA300_0483,SAUSA300_0484,SAUSA300_0485	0	8.421	0	0.107113
gbaA-gbaB-SAUSA300_2517-SAUSA300_2518	SAUSA300_2515,SAUSA300_2516,SAUSA300_2517,SAUSA300_2518	2	3.212	4.0511	0.107289
secE-nusG	SAUSA300_0520,SAUSA300_0521	1	0.743	8.75649	0.1088
ptpA-SAUSA300_1863	SAUSA300_1862,SAUSA300_1863	1	0.746	8.72128	0.109292
murC-ftsK-SAUSA300_1688-SAUSA300_1689-SAUSA300_1690-SAUSA300_1691	SAUSA300_1686,SAUSA300_1687,SAUSA300_1688,SAUSA300_1689,SAUSA300_1690,SAUSA300_1691	0	8.216	0	0.111494
SAUSA300_0670-SAUSA300_0671	SAUSA300_0670,SAUSA300_0671	2	3.301	3.94188	0.113015
comGD-comGC-comGB-comGA-SAUSA300_1505-SAUSA300_1506-glk-SAUSA300_1508-SAUSA300_1509-SAUSA300_1510	SAUSA300_1501,SAUSA300_1502,SAUSA300_1503,SAUSA300_1504,SAUSA300_1505,SAUSA300_1506,SAUSA300_1507,SAUSA300_1508,SAUSA300_1509,SAUSA300_1510	3	6.947	2.80959	0.125213
rpoB-rpoC	SAUSA300_0527,SAUSA300_0528	0	7.311	0	0.133339
est-rnr-smpB	SAUSA300_0763,SAUSA300_0764,SAUSA300_0765	2	3.632	3.58264	0.13532
addB-addA	SAUSA300_0869,SAUSA300_0870	0	7.13	0	0.138255
tatC-tatA	SAUSA300_0347,SAUSA300_0348	1	0.942	6.90666	0.14184
SAUSA300_2522-SAUSA300_2523-SAUSA300_2524	SAUSA300_2522,SAUSA300_2523,SAUSA300_2524	1	0.945	6.88473	0.142344
hisI-hisF-hisA-hisH-hisB-SAUSA300_2610-hisD-hisG-hisZ	SAUSA300_2605,SAUSA300_2606,SAUSA300_2607,SAUSA300_2608,SAUSA300_2609,SAUSA300_2610,SAUSA300_2611,SAUSA300_2612,SAUSA300_2613	0	6.925	0	0.14407
atpE-atpB	SAUSA300_2063,SAUSA300_2064	1	0.983	6.61859	0.14873
recO-era-cdd-dgkA-ybeY-phoH	SAUSA300_1526,SAUSA300_1527,SAUSA300_1528,SAUSA300_1529,SAUSA300_1530,SAUSA300_1531	2	3.851	3.3789	0.150905
SAUSA300_1741-SAUSA300_1742-SAUSA300_1743	SAUSA300_1741,SAUSA300_1742,SAUSA300_1743	1	1.011	6.43528	0.153449
SAUSA300_0010-SAUSA300_0011	SAUSA300_0010,SAUSA300_0011	1	1.021	6.37226	0.155136
SAUSA300_0201-SAUSA300_0202-SAUSA300_0203-ggt	SAUSA300_0201,SAUSA300_0202,SAUSA300_0203,SAUSA300_0204	0	6.483	0	0.157566
SAUSA300_1303-SAUSA300_1304	SAUSA300_1303,SAUSA300_1304	1	1.041	6.24983	0.158516
SAUSA300_0609-mnhA2-mnhB2-mnhC2-mnhD2-mnhE2-mnhF2-mnhG2	SAUSA300_0609,SAUSA300_0610,SAUSA300_0611,SAUSA300_0612,SAUSA300_0613,SAUSA300_0614,SAUSA300_0615,SAUSA300_0616	0	6.414	0	0.159799
comEA-SAUSA300_1550-rsfS-SAUSA300_1552-nadD-SAUSA300_1554-aroE-SAUSA300_1556-SAUSA300_1557-mtnN	SAUSA300_1549,SAUSA300_1550,SAUSA300_1551,SAUSA300_1552,SAUSA300_1553,SAUSA300_1554,SAUSA300_1555,SAUSA300_1556,SAUSA300_1557,SAUSA300_1558	0	6.393	0	0.160486
ulaA-SAUSA300_0331-SAUSA300_0332-SAUSA300_0333	SAUSA300_0330,SAUSA300_0331,SAUSA300_0332,SAUSA300_0333	2	4.05	3.21288	0.165601
SAUSA300_2406-cntF-cntD-cnzC-cntB-cntA	SAUSA300_2406,SAUSA300_2407,SAUSA300_2408,SAUSA300_2409,SAUSA300_2410,SAUSA300_2411	0	6.171	0	0.167956
SAUSA300_1770-SAUSA300_1771	SAUSA300_1770,SAUSA300_1771	1	1.109	5.86661	0.170039
SAUSA300_1884-ligA-pcrA-pcrB	SAUSA300_1884,SAUSA300_1885,SAUSA300_1886,SAUSA300_1887	0	6.1	0	0.170428
SAUSA300_0003-recF-gyrB-gyrA	SAUSA300_0003,SAUSA300_0004,SAUSA300_0005,SAUSA300_0006	0	5.998	0	0.174052
gltB-gltD	SAUSA300_0445,SAUSA300_0446	0	5.98	0	0.174702
SAUSA300_0906-relQ-ppnK-SAUSA300_0909-mgtE-cpaA	SAUSA300_0906,SAUSA300_0907,SAUSA300_0908,SAUSA300_0909,SAUSA300_0910,SAUSA300_0911	0	5.936	0	0.176299
SAUSA300_1561-pxpA-SAUSA300_1563-SAUSA300_1564-SAUSA300_1565-SAUSA300_1566	SAUSA300_1561,SAUSA300_1562,SAUSA300_1563,SAUSA300_1564,SAUSA300_1565,SAUSA300_1566	0	5.521	0	0.192228
SAUSA300_0998-potA-potB-potC-potD-SAUSA300_1003	SAUSA300_0998,SAUSA300_0999,SAUSA300_1000,SAUSA300_1001,SAUSA300_1002,SAUSA300_1003	0	5.417	0	0.196477
SAUSA300_0072-SAUSA300_0073-opp-3B-opp-3C-SAUSA300_0076-SAUSA300_0077	SAUSA300_0072,SAUSA300_0073,SAUSA300_0074,SAUSA300_0075,SAUSA300_0076,SAUSA300_0077	0	5.276	0	0.202415
SAUSA300_0233-hmp	SAUSA300_0233,SAUSA300_0234	1	1.344	4.84083	0.210179
mutS-mutL-glpP	SAUSA300_1188,SAUSA300_1189,SAUSA300_1190	0	5.092	0	0.210484
asp23-SAUSA300_2143-amaP	SAUSA300_2142,SAUSA300_2143,SAUSA300_2144	1	1.372	4.74204	0.214986
mreD-mreC	SAUSA300_1604,SAUSA300_1605	1	1.372	4.74204	0.214986
SAUSA300_1479-SAUSA300_1480-SAUSA300_1481-SAUSA300_1482	SAUSA300_1479,SAUSA300_1480,SAUSA300_1481,SAUSA300_1482	0	4.843	0	0.222017
arcC-arcD-arcB-arcA	SAUSA300_2567,SAUSA300_2568,SAUSA300_2569,SAUSA300_2570	0	4.757	0	0.226174
hprK-lgt-SAUSA300_0745-SAUSA300_0746-trxB	SAUSA300_0743,SAUSA300_0744,SAUSA300_0745,SAUSA300_0746,SAUSA300_0747	0	4.719	0	0.228041
pdxS-pdxT	SAUSA300_0504,SAUSA300_0505	1	1.451	4.48385	0.228566
bmfBB-bfmBAB-bfmBAA-lpdA	SAUSA300_1464,SAUSA300_1465,SAUSA300_1466,SAUSA300_1467	0	4.699	0	0.229031
walR-walK-walH-walI	SAUSA300_0020,SAUSA300_0021,SAUSA300_0022,SAUSA300_0023	0	4.656	0	0.231176
gntP-gntK-gntR-SAUSA300_2445	SAUSA300_2442,SAUSA300_2443,SAUSA300_2444,SAUSA300_2445	0	4.65	0	0.231478
lysC-asd-dapA-dapB-dapD	SAUSA300_1286,SAUSA300_1287,SAUSA300_1288,SAUSA300_1289,SAUSA300_1290	0	4.612	0	0.233397
rplGB-rpsL-rpsG-fusA-tuf	SAUSA300_0529,SAUSA300_0530,SAUSA300_0531,SAUSA300_0532,SAUSA300_0533	2	4.907	2.65175	0.233995
splF-splE-splD-splC-splB-splA	SAUSA300_1753,SAUSA300_1754,SAUSA300_1755,SAUSA300_1756,SAUSA300_1757,SAUSA300_1758	2	4.915	2.64744	0.234668
zapA-SAUSA300_1041-polX-mutS2	SAUSA300_1040,SAUSA300_1041,SAUSA300_1042,SAUSA300_1043	2	4.931	2.63885	0.236017
ctsR-mcsA-mcsB-clpC	SAUSA300_0507,SAUSA300_0508,SAUSA300_0509,SAUSA300_0510	0	4.513	0	0.238488
malK-malE-malF-SAUSA300_0211	SAUSA300_0208,SAUSA300_0209,SAUSA300_0210,SAUSA300_0211	0	4.493	0	0.239533
menF-menD-menH-menB	SAUSA300_0945,SAUSA300_0946,SAUSA300_0947,SAUSA300_0948	0	4.475	0	0.240478
rimP-nusA-SAUSA300_1160-SAUSA300_1161-infB	SAUSA300_1158,SAUSA300_1159,SAUSA300_1160,SAUSA300_1161,SAUSA300_1162	0	4.404	0	0.24425
parE-parC	SAUSA300_1250,SAUSA300_1251	0	4.399	0	0.244518
ssl13-ssl14	SAUSA300_1060,SAUSA300_1061	1	1.545	4.21105	0.244752
ureA-ureB-ureC-ureE-ureF-ureG-ureD	SAUSA300_2238,SAUSA300_2239,SAUSA300_2240,SAUSA300_2241,SAUSA300_2242,SAUSA300_2243,SAUSA300_2244	2	5.048	2.57768	0.245945
SAUSA300_1332-dynA	SAUSA300_1332,SAUSA300_1333	0	4.338	0	0.247821
hepT-ubiE	SAUSA300_1359,SAUSA300_1360	1	1.563	4.16255	0.247854
mupG-murQ-murP-murR	SAUSA300_0192,SAUSA300_0193,SAUSA300_0194,SAUSA300_0195	0	4.295	0	0.250182
argB-argJ-argC-argD	SAUSA300_0184,SAUSA300_0185,SAUSA300_0186,SAUSA300_0187	0	4.287	0	0.250624
mpsA-mpsB	SAUSA300_0425,SAUSA300_0426	0	4.202	0	0.255383
SAUSA300_2322-cobI	SAUSA300_2322,SAUSA300_2323	1	1.613	4.03352	0.256472
folP-folB-folK	SAUSA300_0492,SAUSA300_0493,SAUSA300_0494	1	1.619	4.01857	0.257506
sbcD-sbcC	SAUSA300_1242,SAUSA300_1243	0	4.154	0	0.258119
hom-thrC-thrB-SAUSA300_1229	SAUSA300_1226,SAUSA300_1227,SAUSA300_1228,SAUSA300_1229	0	4.124	0	0.259848
SAUSA300_0324-gcvH-L-SAUSA300_0326-sirTM-lplA2	SAUSA300_0324,SAUSA300_0325,SAUSA300_0326,SAUSA300_0327,SAUSA300_0328	0	4.102	0	0.261125
dltA-dltB-dltC-dltD	SAUSA300_0835,SAUSA300_0836,SAUSA300_0837,SAUSA300_0838	0	4.094	0	0.261591
SAUSA300_2616-SAUSA300_2617-SAUSA300_2618-SAUSA300_2619	SAUSA300_2616,SAUSA300_2617,SAUSA300_2618,SAUSA300_2619	0	4.026	0	0.265596
sfnaC-sfnaB-sfnaA	SAUSA300_2137,SAUSA300_2138,SAUSA300_2139	0	4.014	0	0.26631
greA-udk-SAUSA300_1569-SAUSA300_1570-SAUSA300_1571	SAUSA300_1567,SAUSA300_1568,SAUSA300_1569,SAUSA300_1570,SAUSA300_1571	0	3.971	0	0.26889
qoxD-qoxC-qoxB-qoxA	SAUSA300_0960,SAUSA300_0961,SAUSA300_0962,SAUSA300_0963	0	3.97	0	0.268951
SAUSA300_0701-SAUSA300_0702	SAUSA300_0701,SAUSA300_0702	1	1.698	3.83161	0.271128
SAUSA300_0659-SAUSA300_0660	SAUSA300_0659,SAUSA300_0660	1	1.705	3.81588	0.272335
folC-valS	SAUSA300_1610,SAUSA300_1611	0	3.914	0	0.272359
SAUSA300_2102-SAUSA300_2103	SAUSA300_2102,SAUSA300_2103	1	1.707	3.81141	0.27268
SAUSA300_0576-SAUSA300_0577	SAUSA300_0576,SAUSA300_0577	1	1.725	3.77164	0.275783
SAUSA300_1215-cls1	SAUSA300_1215,SAUSA300_1216	1	1.736	3.74774	0.27768
SAUSA300_0132-SAUSA300_0133-SAUSA300_0134	SAUSA300_0132,SAUSA300_0133,SAUSA300_0134	0	3.805	0	0.279149
fepA-fepB-fepC	SAUSA300_0344,SAUSA300_0345,SAUSA300_0346	0	3.773	0	0.281182
SAUSA300_0981-SAUSA300_0982	SAUSA300_0981,SAUSA300_0982	1	1.768	3.67991	0.283197
xerC-clpQ-hslU-codY	SAUSA300_1145,SAUSA300_1146,SAUSA300_1147,SAUSA300_1148	0	3.705	0	0.285566
SAUSA300_0704-recQ1	SAUSA300_0704,SAUSA300_0705	0	3.676	0	0.287462
cstA-cstB-sqr	SAUSA300_0085,SAUSA300_0086,SAUSA300_0087	0	3.644	0	0.289572
fruR-fruB-fruA	SAUSA300_0683,SAUSA300_0684,SAUSA300_0685	0	3.642	0	0.289705
coaBC-priA	SAUSA300_1104,SAUSA300_1105	0	3.607	0	0.292037
SAUSA300_1329-ilvA1-ald1	SAUSA300_1329,SAUSA300_1330,SAUSA300_1331	0	3.606	0	0.292104
aroA-aroB-aroC	SAUSA300_1355,SAUSA300_1356,SAUSA300_1357	0	3.564	0	0.294936
pmtD-pmtC-pmtB-pmtA-pmtR	SAUSA300_1910,SAUSA300_1911,SAUSA300_1912,SAUSA300_1913,SAUSA300_1914	0	3.563	0	0.295003
nrdI-nrdE-nrdF	SAUSA300_0715,SAUSA300_0716,SAUSA300_0717	0	3.555	0	0.295547
SAUSA300_0241-SAUSA300_0242-SAUSA300_0243-SAUSA300_0244	SAUSA300_0241,SAUSA300_0242,SAUSA300_0243,SAUSA300_0244	0	3.547	0	0.296092
lytH-dtd-relA	SAUSA300_1588,SAUSA300_1589,SAUSA300_1590	0	3.546	0	0.29616
ssuB-ssuA-ssuC-SAUSA300_0177	SAUSA300_0174,SAUSA300_0175,SAUSA300_0176,SAUSA300_0177	0	3.53	0	0.297253
SAUSA300_2374-SAUSA300_2375	SAUSA300_2374,SAUSA300_2375	0	3.521	0	0.297871
dapI-alr2-lysA	SAUSA300_1291,SAUSA300_1292,SAUSA300_1293	0	3.496	0	0.299594
SAUSA300_1851-SAUSA300_1852-SAUSA300_1853-recX	SAUSA300_1851,SAUSA300_1852,SAUSA300_1853,SAUSA300_1854	0	3.487	0	0.300218
pheS-pheT	SAUSA300_1037,SAUSA300_1038	0	3.46	0	0.302099
vraD-vraE-SAUSA300_2635-SAUSA300_2636	SAUSA300_2633,SAUSA300_2634,SAUSA300_2635,SAUSA300_2636	0	3.46	0	0.302099
opp-3B-opp-3C-opp-3D-opp-3F-opp-3A	SAUSA300_0887,SAUSA300_0888,SAUSA300_0889,SAUSA300_0890,SAUSA300_0891	2	5.7	2.28283	0.303295
hemY-hemH-hemE	SAUSA300_1781,SAUSA300_1782,SAUSA300_1783	0	3.442	0	0.303362
SAUSA300_2257-fdhA	SAUSA300_2257,SAUSA300_2258	0	3.427	0	0.304419
phoU-pstB-pstA-pstC	SAUSA300_1279,SAUSA300_1280,SAUSA300_1281,SAUSA300_1282	0	3.391	0	0.306976
SAUSA300_0879-SAUSA300_0880-SAUSA300_0881-SAUSA300_0882	SAUSA300_0879,SAUSA300_0880,SAUSA300_0881,SAUSA300_0882	0	3.38	0	0.307762
lukD-lukE	SAUSA300_1768,SAUSA300_1769	1	1.92	3.38858	0.309384
kdpD-kdpE	SAUSA300_2035,SAUSA300_2036	0	3.352	0	0.309777
glpK-glpD	SAUSA300_1192,SAUSA300_1193	0	3.327	0	0.31159
ribH-ribA-ribB-ribD	SAUSA300_1712,SAUSA300_1713,SAUSA300_1714,SAUSA300_1715	0	3.312	0	0.312685
SAUSA300_1217-SAUSA300_1218-SAUSA300_1219-SAUSA300_1220	SAUSA300_1217,SAUSA300_1218,SAUSA300_1219,SAUSA300_1220	0	3.302	0	0.313417
murE-SAUSA300_0920-prfC	SAUSA300_0919,SAUSA300_0920,SAUSA300_0921	0	3.287	0	0.31452
hptR-hptS-hptA	SAUSA300_0217,SAUSA300_0218,SAUSA300_0219	0	3.272	0	0.315628
truA-ecfT-cbiO1-cbiO	SAUSA300_2173,SAUSA300_2174,SAUSA300_2175,SAUSA300_2176	0	3.27	0	0.315776
opp-2F-opp-2D-opp-2C-opp-2B	SAUSA300_1273,SAUSA300_1274,SAUSA300_1275,SAUSA300_1276	0	3.263	0	0.316295
SAUSA300_0311-psuG-SAUSA300_0313	SAUSA300_0311,SAUSA300_0312,SAUSA300_0313	0	3.247	0	0.317486
sdhC-sdhA-sdhB	SAUSA300_1046,SAUSA300_1047,SAUSA300_1048	0	3.247	0	0.317486
yajC-tgt-queA-ruvB-ruvA-thrR-obgE	SAUSA300_1594,SAUSA300_1595,SAUSA300_1596,SAUSA300_1597,SAUSA300_1598,SAUSA300_1599,SAUSA300_1600	2	5.88	2.21295	0.319659
fapR-plsX-fabD-fabG	SAUSA300_1121,SAUSA300_1122,SAUSA300_1123,SAUSA300_1124	0	3.209	0	0.320338
gatB-gatA-gatC	SAUSA300_1880,SAUSA300_1881,SAUSA300_1882	0	3.201	0	0.320942
SAUSA300_1660-thiI-nifZ	SAUSA300_1660,SAUSA300_1661,SAUSA300_1662	0	3.176	0	0.322842
arlS-arlR	SAUSA300_1307,SAUSA300_1308	1	2.011	3.23524	0.325036
recD2-SAUSA300_1577	SAUSA300_1576,SAUSA300_1577	0	3.147	0	0.325063
nagB-hxlA-hxlB	SAUSA300_0554,SAUSA300_0555,SAUSA300_0556	1	2.017	3.22562	0.326067
SAUSA300_0146-SAUSA300_0147	SAUSA300_0146,SAUSA300_0147	0	3.13	0	0.326375
SAUSA300_0579-SAUSA300_0580	SAUSA300_0579,SAUSA300_0580	1	2.039	3.19082	0.329847
gtfB-gtfA-secA2-asp3-asp2-asp1-secY2	SAUSA300_2582,SAUSA300_2583,SAUSA300_2584,SAUSA300_2585,SAUSA300_2586,SAUSA300_2587,SAUSA300_2588	3	10.527	1.85411	0.329911
hssR-hssS	SAUSA300_2308,SAUSA300_2309	1	2.04	3.18925	0.330018
mccA-mccB	SAUSA300_0433,SAUSA300_0434	1	2.04	3.18925	0.330018
tagG-tagB-tagX	SAUSA300_0625,SAUSA300_0626,SAUSA300_0627	0	3.072	0	0.330903
aspS-hisS	SAUSA300_1586,SAUSA300_1587	0	3.044	0	0.333119
SAUSA300_1351-SAUSA300_1352-SAUSA300_1353-SAUSA300_1354	SAUSA300_1351,SAUSA300_1352,SAUSA300_1353,SAUSA300_1354	0	3.021	0	0.334954
modC-modB-modA	SAUSA300_2228,SAUSA300_2229,SAUSA300_2230	1	2.073	3.13848	0.335684
SAUSA300_1859-ampS-SAUSA300_1861	SAUSA300_1859,SAUSA300_1860,SAUSA300_1861	1	2.079	3.12942	0.336714
ccrB-ccrA	SAUSA300_0037,SAUSA300_0038	0	2.999	0	0.336722
sirC-sirB-sirA	SAUSA300_0115,SAUSA300_0116,SAUSA300_0117	0	2.998	0	0.336803
mvaK1-mvaD-mvaK2	SAUSA300_0572,SAUSA300_0573,SAUSA300_0574	0	2.997	0	0.336883
acyP-xpaC-SAUSA300_1299	SAUSA300_1297,SAUSA300_1298,SAUSA300_1299	1	2.085	3.12042	0.337743
lukG-lukH	SAUSA300_1974,SAUSA300_1975	1	2.093	3.10849	0.339116
holB-SAUSA300_0462-SAUSA300_0463	SAUSA300_0461,SAUSA300_0462,SAUSA300_0463	1	2.094	3.10701	0.339287
cntM-cntL-cntK	SAUSA300_2412,SAUSA300_2413,SAUSA300_2414	0	2.944	0	0.341197
ahpF-ahpC	SAUSA300_0379,SAUSA300_0380	1	2.108	3.08637	0.341689
hsdS2-hsdM2	SAUSA300_1751,SAUSA300_1752	0	2.931	0	0.342266
SAUSA300_0934-SAUSA300_0935-SAUSA300_0936	SAUSA300_0934,SAUSA300_0935,SAUSA300_0936	0	2.925	0	0.342761
SAUSA300_1194-miaA-hfq	SAUSA300_1194,SAUSA300_1195,SAUSA300_1196	1	2.115	3.07616	0.342889
rasP-proS	SAUSA300_1155,SAUSA300_1156	0	2.907	0	0.344252
SAUSA300_2287-SAUSA300_2288	SAUSA300_2287,SAUSA300_2288	1	2.124	3.06312	0.344432
SAUSA300_1439-SAUSA300_1440	SAUSA300_1439,SAUSA300_1440	0	2.888	0	0.345835
cidC-cidB-cidA	SAUSA300_2477,SAUSA300_2478,SAUSA300_2479	0	2.863	0	0.347934
SAUSA300_0238-SAUSA300_0239-SAUSA300_0240	SAUSA300_0238,SAUSA300_0239,SAUSA300_0240	0	2.849	0	0.349116
SAUSA300_0900-trfB-pepF	SAUSA300_0900,SAUSA300_0901,SAUSA300_0902	0	2.841	0	0.349795
apt-recJ	SAUSA300_1591,SAUSA300_1592	0	2.813	0	0.352182
SAUSA300_1698-SAUSA300_1699-SAUSA300_1700	SAUSA300_1698,SAUSA300_1699,SAUSA300_1700	0	2.792	0	0.353988
dnaI-dnaB-nrdR	SAUSA300_1630,SAUSA300_1631,SAUSA300_1632	0	2.791	0	0.354074
thiX-thiW-thiV	SAUSA300_0977,SAUSA300_0978,SAUSA300_0979	0	2.789	0	0.354247
lpl9-SAUSA300_0420-SAUSA300_0421-SAUSA300_0422	SAUSA300_0419,SAUSA300_0420,SAUSA300_0421,SAUSA300_0422	0	2.783	0	0.354766
metS-SAUSA300_0468	SAUSA300_0467,SAUSA300_0468	0	2.777	0	0.355285
saeS-saeR-saeQ	SAUSA300_0690,SAUSA300_0691,SAUSA300_0692	1	2.189	2.97217	0.355564
SAUSA300_1703-leuS	SAUSA300_1703,SAUSA300_1704	0	2.75	0	0.357637
SAUSA300_0832-nagD-SAUSA300_0834	SAUSA300_0832,SAUSA300_0833,SAUSA300_0834	1	2.205	2.9506	0.358302
tcyC-tcyB-tcyA	SAUSA300_2357,SAUSA300_2358,SAUSA300_2359	1	2.207	2.94793	0.358644
trpE-trpG-trpD-trpC-trpF-trpB-trpA	SAUSA300_1262,SAUSA300_1263,SAUSA300_1264,SAUSA300_1265,SAUSA300_1266,SAUSA300_1267,SAUSA300_1268	2	6.317	2.05986	0.360177
SAUSA300_2425-SAUSA300_2426-SAUSA300_2427-SAUSA300_2428-SAUSA300_2429	SAUSA300_2425,SAUSA300_2426,SAUSA300_2427,SAUSA300_2428,SAUSA300_2429	0	2.721	0	0.360187
clpX-tig	SAUSA300_1621,SAUSA300_1622	0	2.714	0	0.360806
pgpB-murG-SAUSA300_1312	SAUSA300_1310,SAUSA300_1311,SAUSA300_1312	1	2.222	2.92803	0.361209
SAUSA300_1301-SAUSA300_1302	SAUSA300_1301,SAUSA300_1302	0	2.691	0	0.362851
cls2-SAUSA300_2045	SAUSA300_2044,SAUSA300_2045	1	2.234	2.9123	0.36326
SAUSA300_0259-bglA	SAUSA300_0259,SAUSA300_0260	1	2.243	2.90061	0.364798
nfo-cshB	SAUSA300_1517,SAUSA300_1518	1	2.246	2.89674	0.36531
mraY-murD-divIB-ftsA-ftsZ	SAUSA300_1076,SAUSA300_1077,SAUSA300_1078,SAUSA300_1079,SAUSA300_1080	2	6.374	2.04144	0.365536
graX-graR-graS	SAUSA300_0644,SAUSA300_0645,SAUSA300_0646	0	2.646	0	0.366898
sspC-sspB-sspA	SAUSA300_0949,SAUSA300_0950,SAUSA300_0951	0	2.64	0	0.367442
sdaAA-sdaAB-SAUSA300_2471	SAUSA300_2469,SAUSA300_2470,SAUSA300_2471	0	2.639	0	0.367533
SAUSA300_1182-SAUSA300_1183	SAUSA300_1182,SAUSA300_1183	0	2.627	0	0.368626
gnd-SAUSA300_1460	SAUSA300_1459,SAUSA300_1460	0	2.607	0	0.370456
nadE-pncB	SAUSA300_1893,SAUSA300_1894	1	2.283	2.84979	0.371627
emrB-SAUSA300_2299	SAUSA300_2298,SAUSA300_2299	0	2.591	0	0.37193
copA-SAUSA300_0079	SAUSA300_0078,SAUSA300_0079	0	2.587	0	0.3723
femA-femB	SAUSA300_1269,SAUSA300_1270	0	2.579	0	0.373041
nhaC-SAUSA300_2251	SAUSA300_2250,SAUSA300_2251	0	2.577	0	0.373226
rplQ-rpoA-rpsK-rpsM-rpmJ-infA	SAUSA300_2177,SAUSA300_2178,SAUSA300_2179,SAUSA300_2180,SAUSA300_2181,SAUSA300_2182	0	2.568	0	0.374063
dhaK-dhaL-dhaM-SAUSA300_0639	SAUSA300_0636,SAUSA300_0637,SAUSA300_0638,SAUSA300_0639	0	2.562	0	0.374622
rocD-gudB	SAUSA300_0860,SAUSA300_0861	0	2.543	0	0.376401
SAUSA300_0298-SAUSA300_0299-SAUSA300_0300-SAUSA300_0301-SAUSA300_0302	SAUSA300_0298,SAUSA300_0299,SAUSA300_0300,SAUSA300_0301,SAUSA300_0302	0	2.533	0	0.377342
gcp-rimI-tsaB-tsaE	SAUSA300_2002,SAUSA300_2003,SAUSA300_2004,SAUSA300_2005	0	2.532	0	0.377436
recQ2-SAUSA300_1372	SAUSA300_1371,SAUSA300_1372	1	2.322	2.80193	0.378277
mntC-mntB-mntA	SAUSA300_0618,SAUSA300_0619,SAUSA300_0620	0	2.499	0	0.380566
hflX-SAUSA300_1199	SAUSA300_1198,SAUSA300_1199	0	2.495	0	0.380947
menC-menE	SAUSA300_1735,SAUSA300_1737	0	2.484	0	0.382
opuBA-opuBB	SAUSA300_0706,SAUSA300_0707	0	2.484	0	0.382
lytS-lytR	SAUSA300_0254,SAUSA300_0255	0	2.482	0	0.382192
radA-SAUSA300_0512	SAUSA300_0511,SAUSA300_0512	0	2.462	0	0.384118
lpl1-SAUSA300_0411-SAUSA300_0412	SAUSA300_0410,SAUSA300_0411,SAUSA300_0412	0	2.46	0	0.384312
srrB-srrA	SAUSA300_1441,SAUSA300_1442	0	2.457	0	0.384602
nanT-nanA	SAUSA300_0314,SAUSA300_0315	0	2.453	0	0.384989
SAUSA300_2129-SAUSA300_2130-SAUSA300_2131	SAUSA300_2129,SAUSA300_2130,SAUSA300_2131	0	2.448	0	0.385475
SAUSA300_2447-SAUSA300_2448	SAUSA300_2447,SAUSA300_2448	0	2.447	0	0.385572
murF-ddl	SAUSA300_2038,SAUSA300_2039	0	2.443	0	0.385961
fruC-scrB	SAUSA300_1993,SAUSA300_1994	0	2.44	0	0.386253
citC-citZ	SAUSA300_1640,SAUSA300_1641	0	2.438	0	0.386448
miaB-SAUSA300_1186-SAUSA300_1187	SAUSA300_1185,SAUSA300_1186,SAUSA300_1187	0	2.428	0	0.387424
lytN-fmhC	SAUSA300_1140,SAUSA300_1141	0	2.423	0	0.387914
lpl3-lpl4-lpl5	SAUSA300_0413,SAUSA300_0414,SAUSA300_0415	0	2.415	0	0.388699
SAUSA300_0350-SAUSA300_0351-SAUSA300_0352-SAUSA300_0353	SAUSA300_0350,SAUSA300_0351,SAUSA300_0352,SAUSA300_0353	0	2.409	0	0.38929
SAUSA300_1532-SAUSA300_1533-SAUSA300_1534	SAUSA300_1532,SAUSA300_1533,SAUSA300_1534	0	2.405	0	0.389684
rumA-dgkB	SAUSA300_1878,SAUSA300_1879	0	2.389	0	0.391267
nrdG-nrdD	SAUSA300_2550,SAUSA300_2551	0	2.383	0	0.391863
comFA-comFC-saHPF	SAUSA300_0734,SAUSA300_0735,SAUSA300_0736	0	2.382	0	0.391962
cydA-cydB	SAUSA300_0986,SAUSA300_0987	0	2.377	0	0.39246
SAUSA300_2086-hmrA	SAUSA300_2086,SAUSA300_2087	0	2.377	0	0.39246
phoR-phoP	SAUSA300_1638,SAUSA300_1639	0	2.365	0	0.393658
SAUSA300_0591-SAUSA300_0592-SAUSA300_0593	SAUSA300_0591,SAUSA300_0592,SAUSA300_0593	0	2.36	0	0.394159
ltaA-ugtP	SAUSA300_0917,SAUSA300_0918	0	2.343	0	0.395869
pabA-pabB-SAUSA300_0700	SAUSA300_0698,SAUSA300_0699,SAUSA300_0700	0	2.336	0	0.396577
esaA-essA-esaB-essB-essC-esxC-esxB-esaE-esxD-esaD-esaG	SAUSA300_0279,SAUSA300_0280,SAUSA300_0281,SAUSA300_0282,SAUSA300_0283,SAUSA300_0284,SAUSA300_0285,SAUSA300_0286,SAUSA300_0287,SAUSA300_0288,SAUSA300_0289	1	13.608	0.478106	0.398521
SAUSA300_0458-tmk-pstA	SAUSA300_0458,SAUSA300_0459,SAUSA300_0460	0	2.313	0	0.398913
sek-seq-SAUSA300_0802-SAUSA300_0803	SAUSA300_0800,SAUSA300_0801,SAUSA300_0802,SAUSA300_0803	0	2.299	0	0.400345
ipk-purR-yabJ-spoVG	SAUSA300_0472,SAUSA300_0473,SAUSA300_0474,SAUSA300_0475	1	2.457	2.64797	0.401226
SAUSA300_0383-SAUSA300_0384-SAUSA300_0385	SAUSA300_0383,SAUSA300_0384,SAUSA300_0385	0	2.286	0	0.401681
dat-SAUSA300_1697	SAUSA300_1696,SAUSA300_1697	0	2.261	0	0.40427
mnmA-iscS	SAUSA300_1578,SAUSA300_1579	0	2.261	0	0.40427
trnaG-trnaC-trnaQ-trnaH-trnaW-trnaY-trnaT-trnaL-trnaD-trnaM-trnaS-trnaD-trnaS-trnaM-trnaM-trnaA-trnaP-trnaR-trnaL-trnaG-trnaL-trnaK-trnaT-trnaV-rrfC	SAUSA300_1813,SAUSA300_1814,SAUSA300_1815,SAUSA300_1816,SAUSA300_1817,SAUSA300_1818,SAUSA300_1819,SAUSA300_1820,SAUSA300_1821,SAUSA300_1822,SAUSA300_1823,SAUSA300_1824,SAUSA300_1825,SAUSA300_1826,SAUSA300_1827,SAUSA300_1828,SAUSA300_1829,SAUSA300_1830,SAUSA300_1831,SAUSA300_1832,SAUSA300_1833,SAUSA300_1834,SAUSA300_1835,SAUSA300_1836,SAUSA300_1837	0	2.258	0	0.404582
rbsK-rbsD-rbsU	SAUSA300_0262,SAUSA300_0263,SAUSA300_0264	0	2.242	0	0.406253
ackA-SAUSA300_1658	SAUSA300_1657,SAUSA300_1658	0	2.237	0	0.406777
feoB-feoA	SAUSA300_2487,SAUSA300_2488	0	2.233	0	0.407197
SAUSA300_0362-SAUSA300_0363-ychF	SAUSA300_0362,SAUSA300_0363,SAUSA300_0364	0	2.223	0	0.40825
SAUSA300_0599-SAUSA300_0600-SAUSA300_0601	SAUSA300_0599,SAUSA300_0600,SAUSA300_0601	1	2.508	2.59413	0.409864
ssl11-SAUSA300_0408	SAUSA300_0407,SAUSA300_0408	0	2.207	0	0.409944
pepT-SAUSA300_0728-SAUSA300_0729	SAUSA300_0727,SAUSA300_0728,SAUSA300_0729	1	2.513	2.58897	0.41071
fabH-fabF	SAUSA300_0885,SAUSA300_0886	0	2.197	0	0.411007
ilvC-leuA-leuB-leuC-leuD-ilvA2	SAUSA300_2009,SAUSA300_2010,SAUSA300_2011,SAUSA300_2012,SAUSA300_2013,SAUSA300_2014	2	6.852	1.89903	0.411033
cdr-SAUSA300_0874	SAUSA300_0873,SAUSA300_0874	0	2.192	0	0.411541
SAUSA300_2496-SAUSA300_2497	SAUSA300_2496,SAUSA300_2497	0	2.175	0	0.413361
glnQ-SAUSA300_1808	SAUSA300_1807,SAUSA300_1808	0	2.172	0	0.413684
rsgA-cfxE-thiN	SAUSA300_1114,SAUSA300_1115,SAUSA300_1116	0	2.168	0	0.414115
rpsP-rimM-trmD-rplS	SAUSA300_1131,SAUSA300_1132,SAUSA300_1133,SAUSA300_1134	0	2.156	0	0.41541
recN-argR	SAUSA300_1468,SAUSA300_1469	0	2.147	0	0.416386
metN1-metP1-metQ1	SAUSA300_0796,SAUSA300_0797,SAUSA300_0798	1	2.552	2.5494	0.417303
cap1C-cap1B-cap1A	SAUSA300_2596,SAUSA300_2597,SAUSA300_2598	0	2.135	0	0.417693
SAUSA300_0824-SAUSA300_0825	SAUSA300_0824,SAUSA300_0825	0	2.121	0	0.419225
metN2-metP2-metQ2	SAUSA300_0435,SAUSA300_0436,SAUSA300_0437	1	2.567	2.5345	0.419835
argH-argG	SAUSA300_0863,SAUSA300_0864	1	2.574	2.52761	0.421017
SAUSA300_0321-SAUSA300_0322	SAUSA300_0321,SAUSA300_0322	0	2.099	0	0.421649
sucC-sucD	SAUSA300_1138,SAUSA300_1139	0	2.096	0	0.421981
SAUSA300_0338-SAUSA300_0339-SAUSA300_0340	SAUSA300_0338,SAUSA300_0339,SAUSA300_0340	1	2.581	2.52076	0.422198
zur-znuB-znuC	SAUSA300_1514,SAUSA300_1515,SAUSA300_1516	0	2.087	0	0.42298
fabZ-murA1-SAUSA300_2056	SAUSA300_2054,SAUSA300_2055,SAUSA300_2056	0	2.083	0	0.423425
SAUSA300_0039-SAUSA300_0040	SAUSA300_0039,SAUSA300_0040	0	2.077	0	0.424094
SAUSA300_2020-SAUSA300_2021	SAUSA300_2020,SAUSA300_2021	1	2.598	2.50426	0.425064
deoD1-tet38	SAUSA300_0138,SAUSA300_0139	0	2.066	0	0.425325
arsR-arsB-arsC	SAUSA300_1717,SAUSA300_1718,SAUSA300_1719	0	2.052	0	0.426899
gatD-murT	SAUSA300_1872,SAUSA300_1873	0	2.046	0	0.427576
SAUSA300_0595-argS	SAUSA300_0595,SAUSA300_0596	0	2.041	0	0.428142
SAUSA300_1118-fakA	SAUSA300_1118,SAUSA300_1119	0	2.035	0	0.428822
fni-corA	SAUSA300_2292,SAUSA300_2293	0	2.027	0	0.429731
panD-panC-panB	SAUSA300_2532,SAUSA300_2533,SAUSA300_2534	0	2.02	0	0.43053
SAUSA300_1376-SAUSA300_1377-SAUSA300_1378	SAUSA300_1376,SAUSA300_1377,SAUSA300_1378	0	2.006	0	0.432133
rluB-scpB-scpA	SAUSA300_1443,SAUSA300_1444,SAUSA300_1445	0	1.996	0	0.433283
ptsH-ptsI	SAUSA300_0983,SAUSA300_0984	0	1.987	0	0.434323
SAUSA300_1906-SAUSA300_1907-SAUSA300_1908	SAUSA300_1906,SAUSA300_1907,SAUSA300_1908	0	1.98	0	0.435134
groEL-groES	SAUSA300_1982,SAUSA300_1983	0	1.976	0	0.435599
argF-arcC1	SAUSA300_1062,SAUSA300_1063	0	1.956	0	0.437934
SAUSA300_1785-ecsA	SAUSA300_1785,SAUSA300_1786	0	1.956	0	0.437934
perR-SAUSA300_1843-SAUSA300_1844	SAUSA300_1842,SAUSA300_1843,SAUSA300_1844	0	1.954	0	0.438168
folE2-bshB2-SAUSA300_0553	SAUSA300_0551,SAUSA300_0552,SAUSA300_0553	0	1.932	0	0.44076
hlgC-hlgB	SAUSA300_2366,SAUSA300_2367	0	1.926	0	0.441471
pykA-pfkA	SAUSA300_1644,SAUSA300_1645	1	2.702	2.40787	0.442553
rnjA-rpoY	SAUSA300_0989,SAUSA300_0990	0	1.915	0	0.442779
sepA-sdrM	SAUSA300_2127,SAUSA300_2128	0	1.915	0	0.442779
icaB-icaC	SAUSA300_2601,SAUSA300_2602	0	1.911	0	0.443256
truB-ribC	SAUSA300_1164,SAUSA300_1165	0	1.903	0	0.444213
murI-SAUSA300_1050-SAUSA300_1051	SAUSA300_1049,SAUSA300_1050,SAUSA300_1051	0	1.895	0	0.445172
SAUSA300_0442-SAUSA300_0443	SAUSA300_0442,SAUSA300_0443	0	1.891	0	0.445653
nos-pheA	SAUSA300_1895,SAUSA300_1896	0	1.89	0	0.445774
deoC1-deoB	SAUSA300_0140,SAUSA300_0141	0	1.868	0	0.448435
SAUSA300_1321-cvfC-SAUSA300_1323	SAUSA300_1321,SAUSA300_1322,SAUSA300_1323	0	1.866	0	0.448679
gapR-gapA-pgk-tpiA-pgm-eno	SAUSA300_0755,SAUSA300_0756,SAUSA300_0757,SAUSA300_0758,SAUSA300_0759,SAUSA300_0760	2	7.242	1.79676	0.448765
SAUSA300_2377-SAUSA300_2378	SAUSA300_2377,SAUSA300_2378	0	1.861	0	0.449287
SAUSA300_1669-serA	SAUSA300_1669,SAUSA300_1670	1	2.751	2.36498	0.450763
tilS-hprT	SAUSA300_0487,SAUSA300_0488	0	1.839	0	0.451982
hsdM1-hsdS1	SAUSA300_0405,SAUSA300_0406	1	2.76	2.35727	0.452269
vraR-vraS-vraT-vraU	SAUSA300_1865,SAUSA300_1866,SAUSA300_1867,SAUSA300_1868	1	2.761	2.35642	0.452436
rpsB-tsf	SAUSA300_1149,SAUSA300_1150	0	1.83	0	0.453091
acuA-acuC	SAUSA300_1680,SAUSA300_1681	0	1.826	0	0.453586
eutD-lipL	SAUSA300_0570,SAUSA300_0571	0	1.825	0	0.45371
SAUSA300_0464-SAUSA300_0465-rsmI	SAUSA300_0464,SAUSA300_0465,SAUSA300_0466	0	1.807	0	0.455946
queE-queD-queC	SAUSA300_0695,SAUSA300_0696,SAUSA300_0697	0	1.806	0	0.456071
accA-accD	SAUSA300_1646,SAUSA300_1647	0	1.801	0	0.456696
SAUSA300_1519-trmK	SAUSA300_1519,SAUSA300_1520	0	1.78	0	0.459334
SAUSA300_0938-tarM	SAUSA300_0938,SAUSA300_0939	0	1.774	0	0.460092
SAUSA300_1684-SAUSA300_1685	SAUSA300_1684,SAUSA300_1685	0	1.764	0	0.46136
airR-airS	SAUSA300_1798,SAUSA300_1799	0	1.757	0	0.462251
SAUSA300_1607-radC-comC	SAUSA300_1607,SAUSA300_1608,SAUSA300_1609	0	1.742	0	0.46417
SAUSA300_0308-SAUSA300_0309	SAUSA300_0308,SAUSA300_0309	0	1.739	0	0.464555
SAUSA300_0957-SAUSA300_0958	SAUSA300_0957,SAUSA300_0958	0	1.735	0	0.465069
glnR-glnA	SAUSA300_1200,SAUSA300_1201	0	1.727	0	0.466101
hrtA-htrB	SAUSA300_2306,SAUSA300_2307	0	1.72	0	0.467006
fhuC-fhuB-fhuG	SAUSA300_0633,SAUSA300_0634,SAUSA300_0635	1	2.85	2.28283	0.46729
SAUSA300_0666-SAUSA300_0667-SAUSA300_0668	SAUSA300_0666,SAUSA300_0667,SAUSA300_0668	0	1.712	0	0.468045
SAUSA300_0846-SAUSA300_0847	SAUSA300_0846,SAUSA300_0847	0	1.709	0	0.468435
SAUSA300_0197-SAUSA300_0198-SAUSA300_0199	SAUSA300_0197,SAUSA300_0198,SAUSA300_0199	1	2.866	2.27009	0.469953
SAUSA300_0866-spsA-spsB	SAUSA300_0866,SAUSA300_0867,SAUSA300_0868	0	1.695	0	0.470264
SAUSA300_1314-crr-msrB-msrA1	SAUSA300_1314,SAUSA300_1315,SAUSA300_1316,SAUSA300_1317	0	1.687	0	0.471314
SAUSA300_1342-nth-dnaD	SAUSA300_1342,SAUSA300_1343,SAUSA300_1344	0	1.681	0	0.472104
SAUSA300_0091-SAUSA300_0092	SAUSA300_0091,SAUSA300_0092	0	1.674	0	0.473028
hutI-hutU	SAUSA300_2277,SAUSA300_2278	1	2.899	2.24425	0.475438
efp-pepQ2	SAUSA300_1490,SAUSA300_1491	0	1.644	0	0.477023
SAUSA300_2216-SAUSA300_2217	SAUSA300_2216,SAUSA300_2217	0	1.644	0	0.477023
pitR-pitA	SAUSA300_0649,SAUSA300_0650	0	1.64	0	0.47756
galE-SAUSA300_0131	SAUSA300_0130,SAUSA300_0131	0	1.635	0	0.478233
rbgA-rnhB	SAUSA300_1136,SAUSA300_1137	0	1.635	0	0.478233
SAUSA300_2334-SAUSA300_2335-SAUSA300_2336	SAUSA300_2334,SAUSA300_2335,SAUSA300_2336	0	1.633	0	0.478502
SAUSA300_2451-SAUSA300_2452	SAUSA300_2451,SAUSA300_2452	0	1.62	0	0.480259
lpl7-lpl8	SAUSA300_0417,SAUSA300_0418	0	1.619	0	0.480395
thiE-thiM-thiD-tenA	SAUSA300_2047,SAUSA300_2048,SAUSA300_2049,SAUSA300_2050	1	2.93	2.2205	0.480582
cspR-queG	SAUSA300_1805,SAUSA300_1806	0	1.602	0	0.48271
SAUSA300_0748-SAUSA300_0749-whiA	SAUSA300_0748,SAUSA300_0749,SAUSA300_0750	1	2.957	2.20023	0.485056
uppS-cdsA	SAUSA300_1153,SAUSA300_1154	0	1.559	0	0.488648
SAUSA300_1623-SAUSA300_1624	SAUSA300_1623,SAUSA300_1624	0	1.556	0	0.489067
htsC-htsB-htsA	SAUSA300_2134,SAUSA300_2135,SAUSA300_2136	1	2.991	2.17522	0.49068
pncA-ppaC	SAUSA300_1899,SAUSA300_1900	0	1.542	0	0.491029
moaB-moeB	SAUSA300_2226,SAUSA300_2227	0	1.541	0	0.49117
SAUSA300_1795-SAUSA300_1796	SAUSA300_1795,SAUSA300_1796	0	1.537	0	0.491733
SAUSA300_2512-SAUSA300_2513-SAUSA300_2514	SAUSA300_2512,SAUSA300_2513,SAUSA300_2514	0	1.534	0	0.492156
SAUSA300_1706-SAUSA300_1707	SAUSA300_1706,SAUSA300_1707	0	1.513	0	0.495136
SAUSA300_0476-glmU	SAUSA300_0476,SAUSA300_0477	0	1.506	0	0.496136
pflB-pflA	SAUSA300_0220,SAUSA300_0221	1	3.027	2.14935	0.496622
mhqE-mhqD	SAUSA300_2457,SAUSA300_2458	0	1.487	0	0.498867
SAUSA300_1018-SAUSA300_1019	SAUSA300_1018,SAUSA300_1019	0	1.487	0	0.498867
SAUSA300_2318-iruO	SAUSA300_2318,SAUSA300_2319	0	1.471	0	0.501187
SAUSA300_2453-SAUSA300_2454	SAUSA300_2453,SAUSA300_2454	0	1.467	0	0.50177
SAUSA300_0544-azo1	SAUSA300_0544,SAUSA300_0545	0	1.456	0	0.503379
SAUSA300_0429-SAUSA300_0430	SAUSA300_0429,SAUSA300_0430	0	1.445	0	0.504996
rnmV-ksgA	SAUSA300_0469,SAUSA300_0470	0	1.44	0	0.505734
SAUSA300_1462-SAUSA300_1463	SAUSA300_1462,SAUSA300_1463	0	1.431	0	0.507068
SAUSA300_2398-SAUSA300_2399	SAUSA300_2398,SAUSA300_2399	0	1.431	0	0.507068
lspA-SAUSA300_1090	SAUSA300_1089,SAUSA300_1090	0	1.408	0	0.510503
SAUSA300_2246-sarY-SAUSA300_2248	SAUSA300_2246,SAUSA300_2247,SAUSA300_2248	1	3.114	2.0893	0.510934
dprA-topA	SAUSA300_1142,SAUSA300_1143	1	3.121	2.08461	0.512082
ctaB-ctaM	SAUSA300_1016,SAUSA300_1017	0	1.397	0	0.51216
glmM-SAUSA300_2112-dacA	SAUSA300_2111,SAUSA300_2112,SAUSA300_2113	1	3.125	2.08194	0.512738
queF-SAUSA300_0714	SAUSA300_0713,SAUSA300_0714	0	1.386	0	0.513827
xerD-fur	SAUSA300_1447,SAUSA300_1448	0	1.385	0	0.513979
trmB-SAUSA300_1695	SAUSA300_1694,SAUSA300_1695	0	1.384	0	0.514131
galM-SAUSA300_2286	SAUSA300_2285,SAUSA300_2286	0	1.375	0	0.515502
SAUSA300_2465-SAUSA300_2466	SAUSA300_2465,SAUSA300_2466	0	1.372	0	0.515961
SAUSA300_pUSA030034-SAUSA300_pUSA030035	SAUSA300_pUSA030034,SAUSA300_pUSA030035	0	1.372	0	0.515961
SAUSA300_1523-ccpN	SAUSA300_1523,SAUSA300_1524	0	1.368	0	0.516574
SAUSA300_1997-SAUSA300_1998	SAUSA300_1997,SAUSA300_1998	0	1.363	0	0.517342
SAUSA300_0212-SAUSA300_0213-SAUSA300_0214	SAUSA300_0212,SAUSA300_0213,SAUSA300_0214	1	3.164	2.05628	0.519125
fakB2-dfrA	SAUSA300_1318,SAUSA300_1319	0	1.333	0	0.52199
SAUSA300_pUSA030021-SAUSA300_pUSA030022	SAUSA300_pUSA030021,SAUSA300_pUSA030022	0	1.326	0	0.523086
rplK-rplA	SAUSA300_0522,SAUSA300_0523	0	1.322	0	0.523713
czrA-czrB	SAUSA300_2098,SAUSA300_2099	0	1.302	0	0.526872
pyrH-frr	SAUSA300_1151,SAUSA300_1152	0	1.295	0	0.527986
SAUSA300_0275-SAUSA300_0276	SAUSA300_0275,SAUSA300_0276	0	1.274	0	0.531352
dck-dgk	SAUSA300_0541,SAUSA300_0542	0	1.272	0	0.531674
ugpQ-maoC	SAUSA300_0030,SAUSA300_0031	0	1.268	0	0.532321
SAUSA300_0056-SAUSA300_0057-SAUSA300_0058-SAUSA300_0059	SAUSA300_0056,SAUSA300_0057,SAUSA300_0058,SAUSA300_0059	0	1.267	0	0.532482
gpsB-SAUSA300_1338-SAUSA300_1339	SAUSA300_1337,SAUSA300_1338,SAUSA300_1339	0	1.264	0	0.532968
SAUSA300_2431-SAUSA300_2432	SAUSA300_2431,SAUSA300_2432	1	3.255	1.99879	0.533971
SAUSA300_0586-SAUSA300_0587	SAUSA300_0586,SAUSA300_0587	0	1.241	0	0.53672
SAUSA300_0674-SAUSA300_0675	SAUSA300_0674,SAUSA300_0675	0	1.23	0	0.538532
SAUSA300_1733-rppH	SAUSA300_1733,SAUSA300_1734	0	1.23	0	0.538532
SAUSA300_0393-SAUSA300_0394	SAUSA300_0393,SAUSA300_0394	0	1.223	0	0.53969
mecR1-rplL	SAUSA300_0033,SAUSA300_0035	0	1.218	0	0.54052
spoIIIE-SAUSA300_1170-SAUSA300_1171-SAUSA300_1172-SAUSA300_1173-SAUSA300_1174-SAUSA300_1175-pgsA	SAUSA300_1169,SAUSA300_1170,SAUSA300_1171,SAUSA300_1172,SAUSA300_1173,SAUSA300_1174,SAUSA300_1175,SAUSA300_1176	2	8.202	1.58646	0.543081
SAUSA300_2095-manA	SAUSA300_2095,SAUSA300_2096	0	1.199	0	0.543697
yjbH-SAUSA300_0904	SAUSA300_0903,SAUSA300_0904	0	1.194	0	0.544539
SAUSA300_0655-SAUSA300_0656	SAUSA300_0655,SAUSA300_0656	0	1.189	0	0.545383
rplT-rpmI-infC	SAUSA300_1625,SAUSA300_1626,SAUSA300_1627	0	1.159	0	0.550499
purE-purK-purC-purS-purQ-purL-purF-purM-purN-purH-purD	SAUSA300_0966,SAUSA300_0967,SAUSA300_0968,SAUSA300_0969,SAUSA300_0970,SAUSA300_0971,SAUSA300_0972,SAUSA300_0973,SAUSA300_0974,SAUSA300_0975,SAUSA300_0976	1	11.171	0.582407	0.551181
sbnA-sbnB-sbnC-sbnD-sbnE-sbnF-sbnG-sbnH-sbnI	SAUSA300_0118,SAUSA300_0119,SAUSA300_0120,SAUSA300_0121,SAUSA300_0122,SAUSA300_0123,SAUSA300_0124,SAUSA300_0125,SAUSA300_0126	1	11.157	0.583138	0.552197
adk-secY-rplO-rpmD-rpsE-rplR-rplF-rpsH-rpsN-rplE-rplX-rplN-rpsQ-rpmC-rplP-rpsC-rplV-rpsS-rplB-rplW-rplD-rplC-rpsJ	SAUSA300_2183,SAUSA300_2184,SAUSA300_2185,SAUSA300_2186,SAUSA300_2187,SAUSA300_2188,SAUSA300_2189,SAUSA300_2190,SAUSA300_2191,SAUSA300_2192,SAUSA300_2193,SAUSA300_2194,SAUSA300_2195,SAUSA300_2196,SAUSA300_2197,SAUSA300_2198,SAUSA300_2199,SAUSA300_2200,SAUSA300_2201,SAUSA300_2202,SAUSA300_2203,SAUSA300_2204,SAUSA300_2205	1	11.154	0.583295	0.552415
lrgA-lrgB	SAUSA300_0256,SAUSA300_0257	0	1.137	0	0.554308
SAUSA300_0567-SAUSA300_0568	SAUSA300_0567,SAUSA300_0568	0	1.115	0	0.558167
rpsF-ssb-rpsR	SAUSA300_0366,SAUSA300_0367,SAUSA300_0368	0	1.114	0	0.558344
tarI'-tarJ'-tarL'	SAUSA300_0245,SAUSA300_0246,SAUSA300_0247	1	3.408	1.90906	0.55874
SAUSA300_pUSA030004-SAUSA300_pUSA030005	SAUSA300_pUSA030004,SAUSA300_pUSA030005	0	1.102	0	0.560472
SAUSA300_2624-SAUSA300_2625	SAUSA300_2624,SAUSA300_2625	0	1.095	0	0.56172
SAUSA300_2519-SAUSA300_2520-SAUSA300_2521	SAUSA300_2519,SAUSA300_2520,SAUSA300_2521	1	3.428	1.89792	0.561959
SAUSA300_1210-SAUSA300_1211-SAUSA300_1212-SAUSA300_1213	SAUSA300_1210,SAUSA300_1211,SAUSA300_1212,SAUSA300_1213	0	1.084	0	0.563693
srtB-isdG	SAUSA300_1034,SAUSA300_1035	0	1.076	0	0.565136
fadA-fadB	SAUSA300_0225,SAUSA300_0226	1	3.475	1.87225	0.569509
rsmD-coaD	SAUSA300_1023,SAUSA300_1024	0	1.026	0	0.57432
epiG-epiE-epiF-epiP-epiD-epiC-epiB-epiA	SAUSA300_1760,SAUSA300_1761,SAUSA300_1762,SAUSA300_1763,SAUSA300_1764,SAUSA300_1765,SAUSA300_1766,SAUSA300_1767	2	8.523	1.52671	0.574839
opuCD-opuCC-opuCB-opuCA	SAUSA300_2390,SAUSA300_2391,SAUSA300_2392,SAUSA300_2393	1	3.511	1.85305	0.575275
tauE-cstR	SAUSA300_0083,SAUSA300_0084	0	1.015	0	0.576379
SAUSA300_0293-SAUSA300_0294	SAUSA300_0293,SAUSA300_0294	0	1.011	0	0.577132
SAUSA300_0792-SAUSA300_0793	SAUSA300_0792,SAUSA300_0793	0	0.993	0	0.580543
phnE1-phnE2-phnC-phnD	SAUSA300_0142,SAUSA300_0143,SAUSA300_0144,SAUSA300_0145	1	3.557	1.82909	0.582623
msrA3-SAUSA300_2595	SAUSA300_2594,SAUSA300_2595	0	0.979	0	0.583226
SAUSA300_2168-SAUSA300_2169-SAUSA300_2170	SAUSA300_2168,SAUSA300_2169,SAUSA300_2170	1	3.563	1.82601	0.583579
dsbA-SAUSA300_2355	SAUSA300_2354,SAUSA300_2355	0	0.965	0	0.585932
mnaA-upp-glyA-SAUSA300_2068	SAUSA300_2065,SAUSA300_2066,SAUSA300_2067,SAUSA300_2068	1	3.597	1.80875	0.588993
isdC-isdD-isdE-isdF	SAUSA300_1030,SAUSA300_1031,SAUSA300_1032,SAUSA300_1033	1	3.612	1.80124	0.591377
rpmA-SAUSA300_1602-rplU	SAUSA300_1601,SAUSA300_1602,SAUSA300_1603	0	0.93	0	0.592811
SAUSA300_0453-recR	SAUSA300_0453,SAUSA300_0454	0	0.92	0	0.594807
rplJ-rplL	SAUSA300_0524,SAUSA300_0525	0	0.911	0	0.596615
SAUSA300_2294-SAUSA300_2295	SAUSA300_2294,SAUSA300_2295	0	0.907	0	0.597423
SAUSA300_2310-SAUSA300_2311	SAUSA300_2310,SAUSA300_2311	0	0.895	0	0.599858
SAUSA300_0295-SAUSA300_0296	SAUSA300_0295,SAUSA300_0296	0	0.888	0	0.601289
htrA2-ktrD	SAUSA300_0923,SAUSA300_0924	1	3.684	1.76603	0.602787
SAUSA300_pUSA030023-SAUSA300_pUSA030024	SAUSA300_pUSA030023,SAUSA300_pUSA030024	0	0.879	0	0.603139
SAUSA300_0440-SAUSA300_0441	SAUSA300_0440,SAUSA300_0441	0	0.87	0	0.605
cysE-cysS-mrnC-SAUSA300_0517-SAUSA300_0518	SAUSA300_0514,SAUSA300_0515,SAUSA300_0516,SAUSA300_0517,SAUSA300_0518	1	3.706	1.75555	0.606262
SAUSA300_1572-SAUSA300_1573-SAUSA300_1574-alaS	SAUSA300_1572,SAUSA300_1573,SAUSA300_1574,SAUSA300_1575	1	3.708	1.7546	0.606578
SAUSA300_2419-SAUSA300_2420	SAUSA300_2419,SAUSA300_2420	0	0.856	0	0.607921
rpsI-rplM	SAUSA300_2171,SAUSA300_2172	0	0.849	0	0.609393
gmk-rpoZ	SAUSA300_1102,SAUSA300_1103	0	0.841	0	0.611084
ilvD-ilvB-ilvH	SAUSA300_2006,SAUSA300_2007,SAUSA300_2008	1	3.739	1.74006	0.611464
SAUSA300_0806-SAUSA300_0807-SAUSA300_0808	SAUSA300_0806,SAUSA300_0807,SAUSA300_0808	0	0.837	0	0.611933
SAUSA300_1081-SAUSA300_1082-sepF-SAUSA300_1084-SAUSA300_1085-SAUSA300_1086	SAUSA300_1081,SAUSA300_1082,SAUSA300_1083,SAUSA300_1084,SAUSA300_1085,SAUSA300_1086	1	3.749	1.73542	0.613038
SAUSA300_2641-SAUSA300_2642	SAUSA300_2641,SAUSA300_2642	0	0.816	0	0.616435
SAUSA300_1492-SAUSA300_1493	SAUSA300_1492,SAUSA300_1493	0	0.813	0	0.617084
SAUSA300_1026-rpmF	SAUSA300_1026,SAUSA300_1027	0	0.81	0	0.617734
SAUSA300_1366-cmk	SAUSA300_1366,SAUSA300_1367	0	0.806	0	0.618604
SAUSA300_2474-SAUSA300_2475	SAUSA300_2474,SAUSA300_2475	0	0.796	0	0.62079
SAUSA300_0931-SAUSA300_0932	SAUSA300_0931,SAUSA300_0932	0	0.793	0	0.621449
sstA-sstB-sstC-sstD	SAUSA300_0718,SAUSA300_0719,SAUSA300_0720,SAUSA300_0721	1	3.819	1.70361	0.624024
SAUSA300_1803-SAUSA300_1804	SAUSA300_1803,SAUSA300_1804	0	0.776	0	0.625214
SAUSA300_1891-SAUSA300_1892	SAUSA300_1891,SAUSA300_1892	0	0.756	0	0.629709
treP-treC-treR	SAUSA300_0448,SAUSA300_0449,SAUSA300_0450	1	3.884	1.6751	0.634174
isdI-SAUSA300_0169	SAUSA300_0168,SAUSA300_0169	0	0.716	0	0.638923
gcvPB-gcvPA-gcvT	SAUSA300_1496,SAUSA300_1497,SAUSA300_1498	1	3.922	1.65887	0.640085
SAUSA300_0794-SAUSA300_0795	SAUSA300_0794,SAUSA300_0795	0	0.675	0	0.648699
mraZ-mraW-ftsL-pbp1	SAUSA300_1072,SAUSA300_1073,SAUSA300_1074,SAUSA300_1075	1	4.012	1.62165	0.654018
SAUSA300_1010-SAUSA300_1011	SAUSA300_1010,SAUSA300_1011	0	0.651	0	0.654589
SAUSA300_1488-SAUSA300_1489	SAUSA300_1488,SAUSA300_1489	0	0.636	0	0.658337
ptpB-SAUSA300_2070-prmC-prfA-tdk	SAUSA300_2069,SAUSA300_2070,SAUSA300_2071,SAUSA300_2072,SAUSA300_2073	1	4.045	1.60842	0.659103
trnaK-trnaQ-trnaY-trnaV-trnaE-trnaN-rrfF	SAUSA300_2116,SAUSA300_2117,SAUSA300_2118,SAUSA300_2119,SAUSA300_2120,SAUSA300_2121,SAUSA300_2122	0	0.631	0	0.659598
pyrP-pyrB-pyrC-carA-carB-pyrF-pyrE-SAUSA300_1099	SAUSA300_1092,SAUSA300_1093,SAUSA300_1094,SAUSA300_1095,SAUSA300_1096,SAUSA300_1097,SAUSA300_1098,SAUSA300_1099	2	9.431	1.37972	0.664545
rnpA-rpmH	SAUSA300_2647,SAUSA300_2648	0	0.611	0	0.664702
moaA-mobA-moaD-moaE-mobB-moeA	SAUSA300_2219,SAUSA300_2220,SAUSA300_2221,SAUSA300_2222,SAUSA300_2223,SAUSA300_2224	1	4.088	1.59151	0.665709
trnaE-trnaN-trnaG-trnaH-trnaF-trnaD-trnaM	SAUSA300_1773,SAUSA300_1774,SAUSA300_1775,SAUSA300_1776,SAUSA300_1777,SAUSA300_1778,SAUSA300_1779	0	0.599	0	0.667813
alr-acpS-SAUSA300_2029-SAUSA300_2030-SAUSA300_2031	SAUSA300_2027,SAUSA300_2028,SAUSA300_2029,SAUSA300_2030,SAUSA300_2031	1	4.11	1.58299	0.66908
coaE-mutM-polA	SAUSA300_1634,SAUSA300_1635,SAUSA300_1636	1	4.157	1.56509	0.676264
dnaE-pde2	SAUSA300_1649,SAUSA300_1650	1	4.159	1.56434	0.676569
SAUSA300_2401-SAUSA300_2402	SAUSA300_2401,SAUSA300_2402	0	0.523	0	0.688421
SAUSA300_1483-SAUSA300_1484-SAUSA300_1485-SAUSA300_1486	SAUSA300_1483,SAUSA300_1484,SAUSA300_1485,SAUSA300_1486	1	4.245	1.53264	0.689641
SAUSA300_2352-SAUSA300_2353	SAUSA300_2352,SAUSA300_2353	0	0.517	0	0.690121
SAUSA300_2042-SAUSA300_2043	SAUSA300_2042,SAUSA300_2043	0	0.514	0	0.690975
SAUSA300_0804-SAUSA300_0805	SAUSA300_0804,SAUSA300_0805	0	0.507	0	0.692979
kdpC-kdpB-kdpA	SAUSA300_2032,SAUSA300_2033,SAUSA300_2034	1	4.302	1.51234	0.698256
SAUSA300_0767-SAUSA300_0768	SAUSA300_0767,SAUSA300_0768	0	0.485	0	0.699385
SAUSA300_0271-SAUSA300_0272-SAUSA300_0273-SAUSA300_0274	SAUSA300_0271,SAUSA300_0272,SAUSA300_0273,SAUSA300_0274	1	4.347	1.49668	0.70503
SAUSA300_0607-SAUSA300_0608	SAUSA300_0607,SAUSA300_0608	0	0.444	0	0.711781
fadD-fadE-fadX	SAUSA300_0227,SAUSA300_0228,SAUSA300_0229	1	4.431	1.46831	0.717607
capA-capB-capC-capD-capE-capF-capG-capH-capI-capJ-capK-capL-capM-capN-capO-capP	SAUSA300_0152,SAUSA300_0153,SAUSA300_0154,SAUSA300_0155,SAUSA300_0156,SAUSA300_0157,SAUSA300_0158,SAUSA300_0159,SAUSA300_0160,SAUSA300_0161,SAUSA300_0162,SAUSA300_0163,SAUSA300_0164,SAUSA300_0165,SAUSA300_0166,SAUSA300_0167	2	16.569	0.785331	0.72034
nasF-nasE-nasD-nirR	SAUSA300_2344,SAUSA300_2345,SAUSA300_2346,SAUSA300_2347	1	4.488	1.44966	0.726091
SAUSA300_2213-femX	SAUSA300_2213,SAUSA300_2214	1	4.549	1.43022	0.735127
SAUSA300_1581-csbD	SAUSA300_1581,SAUSA300_1582	0	0.368	0	0.736602
SAUSA300_2556-SAUSA300_2557-nsaS-nsaR-SAUSA300_2560	SAUSA300_2556,SAUSA300_2557,SAUSA300_2558,SAUSA300_2559,SAUSA300_2560	1	4.649	1.39946	0.74984
nreC-nreB-nreA-narI-narJ-narH-narG	SAUSA300_2337,SAUSA300_2338,SAUSA300_2339,SAUSA300_2340,SAUSA300_2341,SAUSA300_2342,SAUSA300_2343	1	8.682	0.749375	0.761185
SAUSA300_0013-gdpP-rplI-dnaC	SAUSA300_0013,SAUSA300_0014,SAUSA300_0015,SAUSA300_0016	1	4.795	1.35685	0.771095
uvrB-uvrA	SAUSA300_0741,SAUSA300_0742	1	4.839	1.34451	0.777448
SAUSA300_2575-manP-pmi	SAUSA300_2575,SAUSA300_2576,SAUSA300_2577	1	4.855	1.34008	0.779752
pdhA-pdhB-pdhC-pdhD	SAUSA300_0993,SAUSA300_0994,SAUSA300_0995,SAUSA300_0996	1	4.886	1.33157	0.784208
xpt-pbuX-guaB-guaA	SAUSA300_0386,SAUSA300_0387,SAUSA300_0388,SAUSA300_0389	1	4.916	1.32345	0.788507
noc-gidB-gidA-trmE	SAUSA300_2643,SAUSA300_2644,SAUSA300_2645,SAUSA300_2646	1	4.924	1.3213	0.789652
rrfC-trnaA	SAUSA300_0497,SAUSA300_0498	0	0.202	0	0.803213
trnaL-SAUSA300_1812	SAUSA300_1811,SAUSA300_1812	0	0.196	0	0.806098
cbf1-SAUSA300_1792-SAUSA300_1793	SAUSA300_1791,SAUSA300_1792,SAUSA300_1793	1	5.06	1.28579	0.808988
ispA-xseB-xseA-nusB-SAUSA300_1474-accC-accB	SAUSA300_1470,SAUSA300_1471,SAUSA300_1472,SAUSA300_1473,SAUSA300_1474,SAUSA300_1475,SAUSA300_1476	1	5.081	1.28047	0.811953
trnaG-trnaL	SAUSA300_2018,SAUSA300_2019	0	0.178	0	0.815048
SAUSA300_1839-SAUSA300_1840	SAUSA300_1839,SAUSA300_1840	0	0.17	0	0.819178
trnaS-trnaN	SAUSA300_0926,SAUSA300_0927	0	0.165	0	0.821812
trnaE-trnaD	SAUSA300_0018,SAUSA300_0019	0	0.154	0	0.827758
tarI-tarJ-tarL-tarS	SAUSA300_0249,SAUSA300_0250,SAUSA300_0251,SAUSA300_0252	1	5.201	1.25093	0.828786
mtlF-mtlR-mtlA-mtlD	SAUSA300_2105,SAUSA300_2106,SAUSA300_2107,SAUSA300_2108	1	5.257	1.2376	0.836579
bioX-bioW-bioF-bioB-bioA-bioD	SAUSA300_2368,SAUSA300_2369,SAUSA300_2370,SAUSA300_2371,SAUSA300_2372,SAUSA300_2373	1	5.305	1.2264	0.843227
mtaB-rsmE-prmA-dnaJ-dnaK-grpE-hrcA	SAUSA300_1536,SAUSA300_1537,SAUSA300_1538,SAUSA300_1539,SAUSA300_1540,SAUSA300_1541,SAUSA300_1542	1	7.86	0.827745	0.84484
ausA-SAUSA300_0182	SAUSA300_0181,SAUSA300_0182	1	7.832	0.830704	0.847826
atpC-atpD-atpG-atpA-atpH-atpF	SAUSA300_2057,SAUSA300_2058,SAUSA300_2059,SAUSA300_2060,SAUSA300_2061,SAUSA300_2062	1	5.345	1.21723	0.848744
arcC-arcB-SAUSA300_0063-arcD-arcA	SAUSA300_0061,SAUSA300_0062,SAUSA300_0063,SAUSA300_0064,SAUSA300_0065	1	5.458	1.19203	0.86422
sufC-sufD-sufS-sufU-sufB	SAUSA300_0818,SAUSA300_0819,SAUSA300_0820,SAUSA300_0821,SAUSA300_0822	1	5.524	1.17778	0.873183
opp-4A-opp-4D-opp-4F-opp-4B-opp-4C	SAUSA300_0892,SAUSA300_0893,SAUSA300_0894,SAUSA300_0895,SAUSA300_0896	1	5.583	1.16534	0.881149
mdh-metE-metF-metC-metI	SAUSA300_0356,SAUSA300_0357,SAUSA300_0358,SAUSA300_0359,SAUSA300_0360	1	7.09	0.917641	0.930346
dinG-birA-papS-bshA	SAUSA300_1346,SAUSA300_1347,SAUSA300_1348,SAUSA300_1349	1	6.024	1.08003	0.939281
hemL-hemB-hemD-hemC-hemX-hemA	SAUSA300_1614,SAUSA300_1615,SAUSA300_1616,SAUSA300_1617,SAUSA300_1618,SAUSA300_1619	1	6.152	1.05755	0.95569
lacG-lacE-lacF-lacD-lacC-lacB-lacA	SAUSA300_2149,SAUSA300_2150,SAUSA300_2151,SAUSA300_2152,SAUSA300_2153,SAUSA300_2154,SAUSA300_2155	1	6.369	1.02152	0.983034
smc-ftsY-SAUSA300_1129-ffh	SAUSA300_1127,SAUSA300_1128,SAUSA300_1129,SAUSA300_1130	1	6.528	0.996641	0.997308

## Sheet: type I>I
Operon enrichment analysis (type I>I variants)
OPERON	operon_gene_list	n_mutations	operon_length	enrichment	glm.pval
agrB-agrD-agrC-agrA	SAUSA300_1989,SAUSA300_1990,SAUSA300_1991,SAUSA300_1992	13	2.758	21.9048	7.43782e-14
walR-walK-walH-walI	SAUSA300_0020,SAUSA300_0021,SAUSA300_0022,SAUSA300_0023	11	4.656	10.9792	9.00482e-09
rpoB-rpoC	SAUSA300_0527,SAUSA300_0528	8	7.311	5.08515	0.000264931
vraR-vraS-vraT-vraU	SAUSA300_1865,SAUSA300_1866,SAUSA300_1867,SAUSA300_1868	5	2.761	8.41578	0.000395617
yjbH-SAUSA300_0904	SAUSA300_0903,SAUSA300_0904	3	1.194	11.6764	0.00231191
secE-nusG	SAUSA300_0520,SAUSA300_0521	2	0.743	12.5093	0.0111788
greA-udk-SAUSA300_1569-SAUSA300_1570-SAUSA300_1571	SAUSA300_1567,SAUSA300_1568,SAUSA300_1569,SAUSA300_1570,SAUSA300_1571	4	3.971	4.68113	0.0135977
ptpB-SAUSA300_2070-prmC-prfA-tdk	SAUSA300_2069,SAUSA300_2070,SAUSA300_2071,SAUSA300_2072,SAUSA300_2073	4	4.045	4.5955	0.0145229
ipk-purR-yabJ-spoVG	SAUSA300_0472,SAUSA300_0473,SAUSA300_0474,SAUSA300_0475	3	2.457	5.67423	0.0190934
rocD-gudB	SAUSA300_0860,SAUSA300_0861	3	2.543	5.48234	0.0210429
SAUSA300_pUSA030010-SAUSA300_pUSA030011-SAUSA300_pUSA030012-SAUSA300_pUSA030013-SAUSA300_pUSA030014-SAUSA300_pUSA030015-SAUSA300_pUSA030016-SAUSA300_pUSA030017-SAUSA300_pUSA030018-SAUSA300_pUSA030019-SAUSA300_pUSA030020	SAUSA300_pUSA030010,SAUSA300_pUSA030011,SAUSA300_pUSA030012,SAUSA300_pUSA030013,SAUSA300_pUSA030014,SAUSA300_pUSA030015,SAUSA300_pUSA030016,SAUSA300_pUSA030017,SAUSA300_pUSA030018,SAUSA300_pUSA030019,SAUSA300_pUSA030020	0	11.594	0	0.0252014
purE-purK-purC-purS-purQ-purL-purF-purM-purN-purH-purD	SAUSA300_0966,SAUSA300_0967,SAUSA300_0968,SAUSA300_0969,SAUSA300_0970,SAUSA300_0971,SAUSA300_0972,SAUSA300_0973,SAUSA300_0974,SAUSA300_0975,SAUSA300_0976	0	11.171	0	0.0280257
sbnA-sbnB-sbnC-sbnD-sbnE-sbnF-sbnG-sbnH-sbnI	SAUSA300_0118,SAUSA300_0119,SAUSA300_0120,SAUSA300_0121,SAUSA300_0122,SAUSA300_0123,SAUSA300_0124,SAUSA300_0125,SAUSA300_0126	0	11.157	0	0.0281246
thiE-thiM-thiD-tenA	SAUSA300_2047,SAUSA300_2048,SAUSA300_2049,SAUSA300_2050	3	2.93	4.75822	0.0312617
gtfB-gtfA-secA2-asp3-asp2-asp1-secY2	SAUSA300_2582,SAUSA300_2583,SAUSA300_2584,SAUSA300_2585,SAUSA300_2586,SAUSA300_2587,SAUSA300_2588	0	10.527	0	0.0329724
pyrP-pyrB-pyrC-carA-carB-pyrF-pyrE-SAUSA300_1099	SAUSA300_1092,SAUSA300_1093,SAUSA300_1094,SAUSA300_1095,SAUSA300_1096,SAUSA300_1097,SAUSA300_1098,SAUSA300_1099	0	9.431	0	0.043594
pncA-ppaC	SAUSA300_1899,SAUSA300_1900	2	1.542	6.02749	0.049509
lytH-dtd-relA	SAUSA300_1588,SAUSA300_1589,SAUSA300_1590	3	3.546	3.93164	0.0525949
pmtD-pmtC-pmtB-pmtA-pmtR	SAUSA300_1910,SAUSA300_1911,SAUSA300_1912,SAUSA300_1913,SAUSA300_1914	3	3.563	3.91288	0.0532738
holA-comEC-comEB	SAUSA300_1546,SAUSA300_1547,SAUSA300_1548	3	3.668	3.80087	0.0575745
recO-era-cdd-dgkA-ybeY-phoH	SAUSA300_1526,SAUSA300_1527,SAUSA300_1528,SAUSA300_1529,SAUSA300_1530,SAUSA300_1531	3	3.851	3.62025	0.0655139
ausA-SAUSA300_0182	SAUSA300_0181,SAUSA300_0182	0	7.832	0	0.0659965
treP-treC-treR	SAUSA300_0448,SAUSA300_0449,SAUSA300_0450	3	3.884	3.58949	0.0670055
comEA-SAUSA300_1550-rsfS-SAUSA300_1552-nadD-SAUSA300_1554-aroE-SAUSA300_1556-SAUSA300_1557-mtnN	SAUSA300_1549,SAUSA300_1550,SAUSA300_1551,SAUSA300_1552,SAUSA300_1553,SAUSA300_1554,SAUSA300_1555,SAUSA300_1556,SAUSA300_1557,SAUSA300_1558	4	6.393	2.90768	0.0687465
SAUSA300_0201-SAUSA300_0202-SAUSA300_0203-ggt	SAUSA300_0201,SAUSA300_0202,SAUSA300_0203,SAUSA300_0204	4	6.483	2.86731	0.0718929
def2-fmt-sun-rlmN-stp1-pknB	SAUSA300_1108,SAUSA300_1109,SAUSA300_1110,SAUSA300_1111,SAUSA300_1112,SAUSA300_1113	4	6.558	2.83452	0.074579
sucB-sucA	SAUSA300_1305,SAUSA300_1306	3	4.08	3.41706	0.0762409
gapR-gapA-pgk-tpiA-pgm-eno	SAUSA300_0755,SAUSA300_0756,SAUSA300_0757,SAUSA300_0758,SAUSA300_0759,SAUSA300_0760	0	7.242	0	0.0771176
mdh-metE-metF-metC-metI	SAUSA300_0356,SAUSA300_0357,SAUSA300_0358,SAUSA300_0359,SAUSA300_0360	0	7.09	0	0.080297
rluB-scpB-scpA	SAUSA300_1443,SAUSA300_1444,SAUSA300_1445	2	1.996	4.65651	0.082238
hisI-hisF-hisA-hisH-hisB-SAUSA300_2610-hisD-hisG-hisZ	SAUSA300_2605,SAUSA300_2606,SAUSA300_2607,SAUSA300_2608,SAUSA300_2609,SAUSA300_2610,SAUSA300_2611,SAUSA300_2612,SAUSA300_2613	0	6.925	0	0.0839086
ilvC-leuA-leuB-leuC-leuD-ilvA2	SAUSA300_2009,SAUSA300_2010,SAUSA300_2011,SAUSA300_2012,SAUSA300_2013,SAUSA300_2014	0	6.852	0	0.085562
smc-ftsY-SAUSA300_1129-ffh	SAUSA300_1127,SAUSA300_1128,SAUSA300_1129,SAUSA300_1130	0	6.528	0	0.093337
rsgA-cfxE-thiN	SAUSA300_1114,SAUSA300_1115,SAUSA300_1116	2	2.168	4.28708	0.09646
saeS-saeR-saeQ	SAUSA300_0690,SAUSA300_0691,SAUSA300_0692	2	2.189	4.24595	0.0982605
trpE-trpG-trpD-trpC-trpF-trpB-trpA	SAUSA300_1262,SAUSA300_1263,SAUSA300_1264,SAUSA300_1265,SAUSA300_1266,SAUSA300_1267,SAUSA300_1268	0	6.317	0	0.0988103
SAUSA300_2406-cntF-cntD-cnzC-cntB-cntA	SAUSA300_2406,SAUSA300_2407,SAUSA300_2408,SAUSA300_2409,SAUSA300_2410,SAUSA300_2411	0	6.171	0	0.102802
SAUSA300_1884-ligA-pcrA-pcrB	SAUSA300_1884,SAUSA300_1885,SAUSA300_1886,SAUSA300_1887	0	6.1	0	0.104806
SAUSA300_2401-SAUSA300_2402	SAUSA300_2401,SAUSA300_2402	1	0.523	8.88565	0.107099
gltB-gltD	SAUSA300_0445,SAUSA300_0446	0	5.98	0	0.108291
hprK-lgt-SAUSA300_0745-SAUSA300_0746-trxB	SAUSA300_0743,SAUSA300_0744,SAUSA300_0745,SAUSA300_0746,SAUSA300_0747	3	4.719	2.95435	0.110754
SAUSA300_0778-SAUSA300_0779	SAUSA300_0778,SAUSA300_0779	1	0.564	8.23971	0.116544
opp-3B-opp-3C-opp-3D-opp-3F-opp-3A	SAUSA300_0887,SAUSA300_0888,SAUSA300_0889,SAUSA300_0890,SAUSA300_0891	0	5.7	0	0.116929
SAUSA300_1532-SAUSA300_1533-SAUSA300_1534	SAUSA300_1532,SAUSA300_1533,SAUSA300_1534	2	2.405	3.86461	0.117552
crtN-crtM-crtQ-crtP-crtO	SAUSA300_2498,SAUSA300_2499,SAUSA300_2500,SAUSA300_2501,SAUSA300_2502	0	5.527	0	0.122643
sufC-sufD-sufS-sufU-sufB	SAUSA300_0818,SAUSA300_0819,SAUSA300_0820,SAUSA300_0821,SAUSA300_0822	0	5.524	0	0.122745
SAUSA300_1561-pxpA-SAUSA300_1563-SAUSA300_1564-SAUSA300_1565-SAUSA300_1566	SAUSA300_1561,SAUSA300_1562,SAUSA300_1563,SAUSA300_1564,SAUSA300_1565,SAUSA300_1566	0	5.521	0	0.122847
arcC-arcB-SAUSA300_0063-arcD-arcA	SAUSA300_0061,SAUSA300_0062,SAUSA300_0063,SAUSA300_0064,SAUSA300_0065	0	5.458	0	0.125008
rnpA-rpmH	SAUSA300_2647,SAUSA300_2648	1	0.611	7.60588	0.127453
SAUSA300_0072-SAUSA300_0073-opp-3B-opp-3C-SAUSA300_0076-SAUSA300_0077	SAUSA300_0072,SAUSA300_0073,SAUSA300_0074,SAUSA300_0075,SAUSA300_0076,SAUSA300_0077	0	5.276	0	0.131491
dhaK-dhaL-dhaM-SAUSA300_0639	SAUSA300_0636,SAUSA300_0637,SAUSA300_0638,SAUSA300_0639	2	2.562	3.62779	0.132418
rplQ-rpoA-rpsK-rpsM-rpmJ-infA	SAUSA300_2177,SAUSA300_2178,SAUSA300_2179,SAUSA300_2180,SAUSA300_2181,SAUSA300_2182	2	2.568	3.61931	0.132999
nhaC-SAUSA300_2251	SAUSA300_2250,SAUSA300_2251	2	2.577	3.60667	0.133873
SAUSA300_0338-SAUSA300_0339-SAUSA300_0340	SAUSA300_0338,SAUSA300_0339,SAUSA300_0340	2	2.581	3.60108	0.134263
tarI-tarJ-tarL-tarS	SAUSA300_0249,SAUSA300_0250,SAUSA300_0251,SAUSA300_0252	0	5.201	0	0.134271
SAUSA300_1010-SAUSA300_1011	SAUSA300_1010,SAUSA300_1011	1	0.651	7.13855	0.1368
ispA-xseB-xseA-nusB-SAUSA300_1474-accC-accB	SAUSA300_1470,SAUSA300_1471,SAUSA300_1472,SAUSA300_1473,SAUSA300_1474,SAUSA300_1475,SAUSA300_1476	0	5.081	0	0.138857
vraF-vraG	SAUSA300_0647,SAUSA300_0648	2	2.64	3.5206	0.140053
ureA-ureB-ureC-ureE-ureF-ureG-ureD	SAUSA300_2238,SAUSA300_2239,SAUSA300_2240,SAUSA300_2241,SAUSA300_2242,SAUSA300_2243,SAUSA300_2244	0	5.048	0	0.140148
adk-secY-rplO-rpmD-rpsE-rplR-rplF-rpsH-rpsN-rplE-rplX-rplN-rpsQ-rpmC-rplP-rpsC-rplV-rpsS-rplB-rplW-rplD-rplC-rpsJ	SAUSA300_2183,SAUSA300_2184,SAUSA300_2185,SAUSA300_2186,SAUSA300_2187,SAUSA300_2188,SAUSA300_2189,SAUSA300_2190,SAUSA300_2191,SAUSA300_2192,SAUSA300_2193,SAUSA300_2194,SAUSA300_2195,SAUSA300_2196,SAUSA300_2197,SAUSA300_2198,SAUSA300_2199,SAUSA300_2200,SAUSA300_2201,SAUSA300_2202,SAUSA300_2203,SAUSA300_2204,SAUSA300_2205	5	11.154	2.0832	0.141504
zapA-SAUSA300_1041-polX-mutS2	SAUSA300_1040,SAUSA300_1041,SAUSA300_1042,SAUSA300_1043	0	4.931	0	0.144837
mtlF-mtlR-mtlA-mtlD	SAUSA300_2105,SAUSA300_2106,SAUSA300_2107,SAUSA300_2108	3	5.257	2.652	0.144843
rplGB-rpsL-rpsG-fusA-tuf	SAUSA300_0529,SAUSA300_0530,SAUSA300_0531,SAUSA300_0532,SAUSA300_0533	0	4.907	0	0.145821
pdhA-pdhB-pdhC-pdhD	SAUSA300_0993,SAUSA300_0994,SAUSA300_0995,SAUSA300_0996	0	4.886	0	0.146687
clpX-tig	SAUSA300_1621,SAUSA300_1622	2	2.714	3.42461	0.147444
SAUSA300_1479-SAUSA300_1480-SAUSA300_1481-SAUSA300_1482	SAUSA300_1479,SAUSA300_1480,SAUSA300_1481,SAUSA300_1482	0	4.843	0	0.14848
uvrB-uvrA	SAUSA300_0741,SAUSA300_0742	0	4.839	0	0.148648
atpC-atpD-atpG-atpA-atpH-atpF	SAUSA300_2057,SAUSA300_2058,SAUSA300_2059,SAUSA300_2060,SAUSA300_2061,SAUSA300_2062	3	5.345	2.60834	0.150836
arcC-arcD-arcB-arcA	SAUSA300_2567,SAUSA300_2568,SAUSA300_2569,SAUSA300_2570	0	4.757	0	0.15214
bmfBB-bfmBAB-bfmBAA-lpdA	SAUSA300_1464,SAUSA300_1465,SAUSA300_1466,SAUSA300_1467	0	4.699	0	0.154666
lysC-asd-dapA-dapB-dapD	SAUSA300_1286,SAUSA300_1287,SAUSA300_1288,SAUSA300_1289,SAUSA300_1290	0	4.612	0	0.158544
SAUSA300_1891-SAUSA300_1892	SAUSA300_1891,SAUSA300_1892	1	0.756	6.14708	0.161557
malK-malE-malF-SAUSA300_0211	SAUSA300_0208,SAUSA300_0209,SAUSA300_0210,SAUSA300_0211	0	4.493	0	0.16403
nasF-nasE-nasD-nirR	SAUSA300_2344,SAUSA300_2345,SAUSA300_2346,SAUSA300_2347	0	4.488	0	0.164265
menF-menD-menH-menB	SAUSA300_0945,SAUSA300_0946,SAUSA300_0947,SAUSA300_0948	0	4.475	0	0.164878
SAUSA300_1332-dynA	SAUSA300_1332,SAUSA300_1333	0	4.338	0	0.171502
SAUSA300_1366-cmk	SAUSA300_1366,SAUSA300_1367	1	0.806	5.76575	0.173439
mupG-murQ-murP-murR	SAUSA300_0192,SAUSA300_0193,SAUSA300_0194,SAUSA300_0195	0	4.295	0	0.173644
mpsA-mpsB	SAUSA300_0425,SAUSA300_0426	0	4.202	0	0.178381
dnaE-pde2	SAUSA300_1649,SAUSA300_1650	0	4.159	0	0.180622
coaE-mutM-polA	SAUSA300_1634,SAUSA300_1635,SAUSA300_1636	0	4.157	0	0.180727
dltA-dltB-dltC-dltD	SAUSA300_0835,SAUSA300_0836,SAUSA300_0837,SAUSA300_0838	0	4.094	0	0.184071
moaA-mobA-moaD-moaE-mobB-moeA	SAUSA300_2219,SAUSA300_2220,SAUSA300_2221,SAUSA300_2222,SAUSA300_2223,SAUSA300_2224	0	4.088	0	0.184393
esaA-essA-esaB-essB-essC-esxC-esxB-esaE-esxD-esaD-esaG	SAUSA300_0279,SAUSA300_0280,SAUSA300_0281,SAUSA300_0282,SAUSA300_0283,SAUSA300_0284,SAUSA300_0285,SAUSA300_0286,SAUSA300_0287,SAUSA300_0288,SAUSA300_0289	1	13.608	0.341505	0.189718
dprA-topA	SAUSA300_1142,SAUSA300_1143	2	3.121	2.97802	0.190473
qoxD-qoxC-qoxB-qoxA	SAUSA300_0960,SAUSA300_0961,SAUSA300_0962,SAUSA300_0963	0	3.97	0	0.190865
gcvPB-gcvPA-gcvT	SAUSA300_1496,SAUSA300_1497,SAUSA300_1498	0	3.922	0	0.193573
folC-valS	SAUSA300_1610,SAUSA300_1611	0	3.914	0	0.194028
SAUSA300_0453-recR	SAUSA300_0453,SAUSA300_0454	1	0.92	5.0513	0.200694
SAUSA300_1081-SAUSA300_1082-sepF-SAUSA300_1084-SAUSA300_1085-SAUSA300_1086	SAUSA300_1081,SAUSA300_1082,SAUSA300_1083,SAUSA300_1084,SAUSA300_1085,SAUSA300_1086	0	3.749	0	0.203712
ilvD-ilvB-ilvH	SAUSA300_2006,SAUSA300_2007,SAUSA300_2008	0	3.739	0	0.204317
hptR-hptS-hptA	SAUSA300_0217,SAUSA300_0218,SAUSA300_0219	2	3.272	2.84058	0.207373
htrA2-ktrD	SAUSA300_0923,SAUSA300_0924	0	3.684	0	0.207682
SAUSA300_0704-recQ1	SAUSA300_0704,SAUSA300_0705	0	3.676	0	0.208177
cstA-cstB-sqr	SAUSA300_0085,SAUSA300_0086,SAUSA300_0087	0	3.644	0	0.21017
fruR-fruB-fruA	SAUSA300_0683,SAUSA300_0684,SAUSA300_0685	0	3.642	0	0.210296
est-rnr-smpB	SAUSA300_0763,SAUSA300_0764,SAUSA300_0765	0	3.632	0	0.210924
coaBC-priA	SAUSA300_1104,SAUSA300_1105	0	3.607	0	0.212504
glpK-glpD	SAUSA300_1192,SAUSA300_1193	2	3.327	2.79362	0.213643
aroA-aroB-aroC	SAUSA300_1355,SAUSA300_1356,SAUSA300_1357	0	3.564	0	0.215254
SAUSA300_2168-SAUSA300_2169-SAUSA300_2170	SAUSA300_2168,SAUSA300_2169,SAUSA300_2170	0	3.563	0	0.215318
nrdI-nrdE-nrdF	SAUSA300_0715,SAUSA300_0716,SAUSA300_0717	0	3.555	0	0.215835
SAUSA300_0241-SAUSA300_0242-SAUSA300_0243-SAUSA300_0244	SAUSA300_0241,SAUSA300_0242,SAUSA300_0243,SAUSA300_0244	0	3.547	0	0.216353
dapI-alr2-lysA	SAUSA300_1291,SAUSA300_1292,SAUSA300_1293	0	3.496	0	0.21969
phoU-pstB-pstA-pstC	SAUSA300_1279,SAUSA300_1280,SAUSA300_1281,SAUSA300_1282	2	3.391	2.7409	0.221014
fadA-fadB	SAUSA300_0225,SAUSA300_0226	0	3.475	0	0.221081
pheS-pheT	SAUSA300_1037,SAUSA300_1038	0	3.46	0	0.222082
hemY-hemH-hemE	SAUSA300_1781,SAUSA300_1782,SAUSA300_1783	0	3.442	0	0.22329
SAUSA300_2519-SAUSA300_2520-SAUSA300_2521	SAUSA300_2519,SAUSA300_2520,SAUSA300_2521	2	3.428	2.71132	0.22531
tarI'-tarJ'-tarL'	SAUSA300_0245,SAUSA300_0246,SAUSA300_0247	0	3.408	0	0.225593
ribH-ribA-ribB-ribD	SAUSA300_1712,SAUSA300_1713,SAUSA300_1714,SAUSA300_1715	0	3.312	0	0.232251
SAUSA300_1217-SAUSA300_1218-SAUSA300_1219-SAUSA300_1220	SAUSA300_1217,SAUSA300_1218,SAUSA300_1219,SAUSA300_1220	0	3.302	0	0.232958
SAUSA300_0670-SAUSA300_0671	SAUSA300_0670,SAUSA300_0671	0	3.301	0	0.233029
SAUSA300_2374-SAUSA300_2375	SAUSA300_2374,SAUSA300_2375	2	3.521	2.6397	0.236219
SAUSA300_2431-SAUSA300_2432	SAUSA300_2431,SAUSA300_2432	0	3.255	0	0.236316
gbaA-gbaB-SAUSA300_2517-SAUSA300_2518	SAUSA300_2515,SAUSA300_2516,SAUSA300_2517,SAUSA300_2518	0	3.212	0	0.23944
fapR-plsX-fabD-fabG	SAUSA300_1121,SAUSA300_1122,SAUSA300_1123,SAUSA300_1124	0	3.209	0	0.23966
gatB-gatA-gatC	SAUSA300_1880,SAUSA300_1881,SAUSA300_1882	0	3.201	0	0.240247
SAUSA300_1660-thiI-nifZ	SAUSA300_1660,SAUSA300_1661,SAUSA300_1662	0	3.176	0	0.242094
SAUSA300_0212-SAUSA300_0213-SAUSA300_0214	SAUSA300_0212,SAUSA300_0213,SAUSA300_0214	0	3.164	0	0.242986
recD2-SAUSA300_1577	SAUSA300_1576,SAUSA300_1577	0	3.147	0	0.244258
mnaA-upp-glyA-SAUSA300_2068	SAUSA300_2065,SAUSA300_2066,SAUSA300_2067,SAUSA300_2068	2	3.597	2.58393	0.245248
glmM-SAUSA300_2112-dacA	SAUSA300_2111,SAUSA300_2112,SAUSA300_2113	0	3.125	0	0.245915
SAUSA300_2246-sarY-SAUSA300_2248	SAUSA300_2246,SAUSA300_2247,SAUSA300_2248	0	3.114	0	0.246749
SAUSA300_0567-SAUSA300_0568	SAUSA300_0567,SAUSA300_0568	1	1.115	4.16789	0.247642
tagG-tagB-tagX	SAUSA300_0625,SAUSA300_0626,SAUSA300_0627	0	3.072	0	0.249964
SAUSA300_0826-SAUSA300_0827-SAUSA300_0828	SAUSA300_0826,SAUSA300_0827,SAUSA300_0828	0	3.034	0	0.252918
pflB-pflA	SAUSA300_0220,SAUSA300_0221	0	3.027	0	0.253466
SAUSA300_1351-SAUSA300_1352-SAUSA300_1353-SAUSA300_1354	SAUSA300_1351,SAUSA300_1352,SAUSA300_1353,SAUSA300_1354	0	3.021	0	0.253938
sirC-sirB-sirA	SAUSA300_0115,SAUSA300_0116,SAUSA300_0117	0	2.998	0	0.255755
mvaK1-mvaD-mvaK2	SAUSA300_0572,SAUSA300_0573,SAUSA300_0574	0	2.997	0	0.255835
htsC-htsB-htsA	SAUSA300_2134,SAUSA300_2135,SAUSA300_2136	0	2.991	0	0.256312
xerC-clpQ-hslU-codY	SAUSA300_1145,SAUSA300_1146,SAUSA300_1147,SAUSA300_1148	2	3.705	2.50861	0.258246
cysE-cysS-mrnC-SAUSA300_0517-SAUSA300_0518	SAUSA300_0514,SAUSA300_0515,SAUSA300_0516,SAUSA300_0517,SAUSA300_0518	2	3.706	2.50793	0.258367
SAUSA300_1572-SAUSA300_1573-SAUSA300_1574-alaS	SAUSA300_1572,SAUSA300_1573,SAUSA300_1574,SAUSA300_1575	2	3.708	2.50658	0.25861
SAUSA300_0748-SAUSA300_0749-whiA	SAUSA300_0748,SAUSA300_0749,SAUSA300_0750	0	2.957	0	0.259035
cntM-cntL-cntK	SAUSA300_2412,SAUSA300_2413,SAUSA300_2414	0	2.944	0	0.260086
SAUSA300_0934-SAUSA300_0935-SAUSA300_0936	SAUSA300_0934,SAUSA300_0935,SAUSA300_0936	0	2.925	0	0.261631
rasP-proS	SAUSA300_1155,SAUSA300_1156	0	2.907	0	0.263105
hutI-hutU	SAUSA300_2277,SAUSA300_2278	0	2.899	0	0.263764
SAUSA300_1439-SAUSA300_1440	SAUSA300_1439,SAUSA300_1440	0	2.888	0	0.264673
cidC-cidB-cidA	SAUSA300_2477,SAUSA300_2478,SAUSA300_2479	0	2.863	0	0.266753
vraA-vraB-vraC	SAUSA300_0559,SAUSA300_0560,SAUSA300_0561	0	2.857	0	0.267255
SAUSA300_2095-manA	SAUSA300_2095,SAUSA300_2096	1	1.199	3.87589	0.267923
SAUSA300_0238-SAUSA300_0239-SAUSA300_0240	SAUSA300_0238,SAUSA300_0239,SAUSA300_0240	0	2.849	0	0.267926
SAUSA300_0132-SAUSA300_0133-SAUSA300_0134	SAUSA300_0132,SAUSA300_0133,SAUSA300_0134	2	3.805	2.44268	0.270448
apt-recJ	SAUSA300_1591,SAUSA300_1592	0	2.813	0	0.270974
recU-pbp2	SAUSA300_1340,SAUSA300_1341	0	2.806	0	0.271572
SAUSA300_1698-SAUSA300_1699-SAUSA300_1700	SAUSA300_1698,SAUSA300_1699,SAUSA300_1700	0	2.792	0	0.272772
thiX-thiW-thiV	SAUSA300_0977,SAUSA300_0978,SAUSA300_0979	0	2.789	0	0.27303
metS-SAUSA300_0468	SAUSA300_0467,SAUSA300_0468	0	2.777	0	0.274065
hsdM1-hsdS1	SAUSA300_0405,SAUSA300_0406	0	2.76	0	0.27554
SAUSA300_1703-leuS	SAUSA300_1703,SAUSA300_1704	0	2.75	0	0.276413
SAUSA300_0586-SAUSA300_0587	SAUSA300_0586,SAUSA300_0587	1	1.241	3.74472	0.278065
SAUSA300_2425-SAUSA300_2426-SAUSA300_2427-SAUSA300_2428-SAUSA300_2429	SAUSA300_2425,SAUSA300_2426,SAUSA300_2427,SAUSA300_2428,SAUSA300_2429	0	2.721	0	0.278962
pykA-pfkA	SAUSA300_1644,SAUSA300_1645	0	2.702	0	0.280649
SAUSA300_1182-SAUSA300_1183	SAUSA300_1182,SAUSA300_1183	0	2.627	0	0.287432
gnd-SAUSA300_1460	SAUSA300_1459,SAUSA300_1460	0	2.607	0	0.289276
emrB-SAUSA300_2299	SAUSA300_2298,SAUSA300_2299	0	2.591	0	0.290762
copA-SAUSA300_0079	SAUSA300_0078,SAUSA300_0079	0	2.587	0	0.291136
femA-femB	SAUSA300_1269,SAUSA300_1270	0	2.579	0	0.291883
argH-argG	SAUSA300_0863,SAUSA300_0864	0	2.574	0	0.292352
SAUSA300_0105-norC	SAUSA300_0105,SAUSA300_0106	0	2.568	0	0.292916
metN2-metP2-metQ2	SAUSA300_0435,SAUSA300_0436,SAUSA300_0437	0	2.567	0	0.29301
metN1-metP1-metQ1	SAUSA300_0796,SAUSA300_0797,SAUSA300_0798	0	2.552	0	0.294426
SAUSA300_0298-SAUSA300_0299-SAUSA300_0300-SAUSA300_0301-SAUSA300_0302	SAUSA300_0298,SAUSA300_0299,SAUSA300_0300,SAUSA300_0301,SAUSA300_0302	0	2.533	0	0.296232
gcp-rimI-tsaB-tsaE	SAUSA300_2002,SAUSA300_2003,SAUSA300_2004,SAUSA300_2005	0	2.532	0	0.296327
pepT-SAUSA300_0728-SAUSA300_0729	SAUSA300_0727,SAUSA300_0728,SAUSA300_0729	0	2.513	0	0.298148
hflX-SAUSA300_1199	SAUSA300_1198,SAUSA300_1199	0	2.495	0	0.299886
opuBA-opuBB	SAUSA300_0706,SAUSA300_0707	0	2.484	0	0.300955
lytS-lytR	SAUSA300_0254,SAUSA300_0255	0	2.482	0	0.30115
radA-SAUSA300_0512	SAUSA300_0511,SAUSA300_0512	0	2.462	0	0.303108
srrB-srrA	SAUSA300_1441,SAUSA300_1442	0	2.457	0	0.303599
nanT-nanA	SAUSA300_0314,SAUSA300_0315	0	2.453	0	0.303994
SAUSA300_2129-SAUSA300_2130-SAUSA300_2131	SAUSA300_2129,SAUSA300_2130,SAUSA300_2131	0	2.448	0	0.304487
murF-ddl	SAUSA300_2038,SAUSA300_2039	0	2.443	0	0.304982
lytN-fmhC	SAUSA300_1140,SAUSA300_1141	0	2.423	0	0.306972
SAUSA300_0324-gcvH-L-SAUSA300_0326-sirTM-lplA2	SAUSA300_0324,SAUSA300_0325,SAUSA300_0326,SAUSA300_0327,SAUSA300_0328	2	4.102	2.26582	0.307547
lpl3-lpl4-lpl5	SAUSA300_0413,SAUSA300_0414,SAUSA300_0415	0	2.415	0	0.307773
SAUSA300_0350-SAUSA300_0351-SAUSA300_0352-SAUSA300_0353	SAUSA300_0350,SAUSA300_0351,SAUSA300_0352,SAUSA300_0353	0	2.409	0	0.308375
budA1-budB	SAUSA300_2165,SAUSA300_2166	0	2.405	0	0.308777
SAUSA300_2465-SAUSA300_2466	SAUSA300_2465,SAUSA300_2466	1	1.372	3.38717	0.309674
nrdG-nrdD	SAUSA300_2550,SAUSA300_2551	0	2.383	0	0.311002
comFA-comFC-saHPF	SAUSA300_0734,SAUSA300_0735,SAUSA300_0736	0	2.382	0	0.311104
cydA-cydB	SAUSA300_0986,SAUSA300_0987	0	2.377	0	0.311612
SAUSA300_2086-hmrA	SAUSA300_2086,SAUSA300_2087	0	2.377	0	0.311612
phoR-phoP	SAUSA300_1638,SAUSA300_1639	0	2.365	0	0.312838
SAUSA300_0591-SAUSA300_0592-SAUSA300_0593	SAUSA300_0591,SAUSA300_0592,SAUSA300_0593	0	2.36	0	0.31335
ltaA-ugtP	SAUSA300_0917,SAUSA300_0918	0	2.343	0	0.315101
pabA-pabB-SAUSA300_0700	SAUSA300_0698,SAUSA300_0699,SAUSA300_0700	0	2.336	0	0.315826
gpsA-engA	SAUSA300_1363,SAUSA300_1364	0	2.325	0	0.316969
SAUSA300_0458-tmk-pstA	SAUSA300_0458,SAUSA300_0459,SAUSA300_0460	0	2.313	0	0.318222
sek-seq-SAUSA300_0802-SAUSA300_0803	SAUSA300_0800,SAUSA300_0801,SAUSA300_0802,SAUSA300_0803	0	2.299	0	0.319692
SAUSA300_0383-SAUSA300_0384-SAUSA300_0385	SAUSA300_0383,SAUSA300_0384,SAUSA300_0385	0	2.286	0	0.321065
nadE-pncB	SAUSA300_1893,SAUSA300_1894	0	2.283	0	0.321383
trnaG-trnaC-trnaQ-trnaH-trnaW-trnaY-trnaT-trnaL-trnaD-trnaM-trnaS-trnaD-trnaS-trnaM-trnaM-trnaA-trnaP-trnaR-trnaL-trnaG-trnaL-trnaK-trnaT-trnaV-rrfC	SAUSA300_1813,SAUSA300_1814,SAUSA300_1815,SAUSA300_1816,SAUSA300_1817,SAUSA300_1818,SAUSA300_1819,SAUSA300_1820,SAUSA300_1821,SAUSA300_1822,SAUSA300_1823,SAUSA300_1824,SAUSA300_1825,SAUSA300_1826,SAUSA300_1827,SAUSA300_1828,SAUSA300_1829,SAUSA300_1830,SAUSA300_1831,SAUSA300_1832,SAUSA300_1833,SAUSA300_1834,SAUSA300_1835,SAUSA300_1836,SAUSA300_1837	0	2.258	0	0.324049
rbsK-rbsD-rbsU	SAUSA300_0262,SAUSA300_0263,SAUSA300_0264	0	2.242	0	0.325771
SAUSA300_1483-SAUSA300_1484-SAUSA300_1485-SAUSA300_1486	SAUSA300_1483,SAUSA300_1484,SAUSA300_1485,SAUSA300_1486	2	4.245	2.18949	0.325822
SAUSA300_0362-SAUSA300_0363-ychF	SAUSA300_0362,SAUSA300_0363,SAUSA300_0364	0	2.223	0	0.327831
pgpB-murG-SAUSA300_1312	SAUSA300_1310,SAUSA300_1311,SAUSA300_1312	0	2.222	0	0.32794
ssl11-SAUSA300_0408	SAUSA300_0407,SAUSA300_0408	0	2.207	0	0.329579
tcyC-tcyB-tcyA	SAUSA300_2357,SAUSA300_2358,SAUSA300_2359	0	2.207	0	0.329579
SAUSA300_0544-azo1	SAUSA300_0544,SAUSA300_0545	1	1.456	3.19175	0.3299
cdr-SAUSA300_0874	SAUSA300_0873,SAUSA300_0874	0	2.192	0	0.33123
glnQ-SAUSA300_1808	SAUSA300_1807,SAUSA300_1808	0	2.172	0	0.333447
SAUSA300_2318-iruO	SAUSA300_2318,SAUSA300_2319	1	1.471	3.15921	0.333507
rpsP-rimM-trmD-rplS	SAUSA300_1131,SAUSA300_1132,SAUSA300_1133,SAUSA300_1134	0	2.156	0	0.335235
recN-argR	SAUSA300_1468,SAUSA300_1469	0	2.147	0	0.336247
SAUSA300_0824-SAUSA300_0825	SAUSA300_0824,SAUSA300_0825	0	2.121	0	0.339192
SAUSA300_1194-miaA-hfq	SAUSA300_1194,SAUSA300_1195,SAUSA300_1196	0	2.115	0	0.339877
ahpF-ahpC	SAUSA300_0379,SAUSA300_0380	0	2.108	0	0.340678
SAUSA300_0321-SAUSA300_0322	SAUSA300_0321,SAUSA300_0322	0	2.099	0	0.341711
sucC-sucD	SAUSA300_1138,SAUSA300_1139	0	2.096	0	0.342057
holB-SAUSA300_0462-SAUSA300_0463	SAUSA300_0461,SAUSA300_0462,SAUSA300_0463	0	2.094	0	0.342287
lukG-lukH	SAUSA300_1974,SAUSA300_1975	0	2.093	0	0.342403
zur-znuB-znuC	SAUSA300_1514,SAUSA300_1515,SAUSA300_1516	0	2.087	0	0.343096
acyP-xpaC-SAUSA300_1299	SAUSA300_1297,SAUSA300_1298,SAUSA300_1299	0	2.085	0	0.343328
fabZ-murA1-SAUSA300_2056	SAUSA300_2054,SAUSA300_2055,SAUSA300_2056	0	2.083	0	0.343559
SAUSA300_0039-SAUSA300_0040	SAUSA300_0039,SAUSA300_0040	0	2.077	0	0.344256
modC-modB-modA	SAUSA300_2228,SAUSA300_2229,SAUSA300_2230	0	2.073	0	0.344721
deoD1-tet38	SAUSA300_0138,SAUSA300_0139	0	2.066	0	0.345538
parE-parC	SAUSA300_1250,SAUSA300_1251	2	4.399	2.11284	0.345765
rimP-nusA-SAUSA300_1160-SAUSA300_1161-infB	SAUSA300_1158,SAUSA300_1159,SAUSA300_1160,SAUSA300_1161,SAUSA300_1162	2	4.404	2.11044	0.346417
gatD-murT	SAUSA300_1872,SAUSA300_1873	0	2.046	0	0.347885
SAUSA300_0595-argS	SAUSA300_0595,SAUSA300_0596	0	2.041	0	0.348475
mccA-mccB	SAUSA300_0433,SAUSA300_0434	0	2.04	0	0.348593
SAUSA300_1118-fakA	SAUSA300_1118,SAUSA300_1119	0	2.035	0	0.349185
fni-corA	SAUSA300_2292,SAUSA300_2293	0	2.027	0	0.350135
moaB-moeB	SAUSA300_2226,SAUSA300_2227	1	1.541	3.0157	0.350316
nagB-hxlA-hxlB	SAUSA300_0554,SAUSA300_0555,SAUSA300_0556	0	2.017	0	0.351327
arlS-arlR	SAUSA300_1307,SAUSA300_1308	0	2.011	0	0.352045
SAUSA300_1376-SAUSA300_1377-SAUSA300_1378	SAUSA300_1376,SAUSA300_1377,SAUSA300_1378	0	2.006	0	0.352644
groEL-groES	SAUSA300_1982,SAUSA300_1983	0	1.976	0	0.356272
argF-arcC1	SAUSA300_1062,SAUSA300_1063	0	1.956	0	0.35872
SAUSA300_1785-ecsA	SAUSA300_1785,SAUSA300_1786	0	1.956	0	0.35872
ctsR-mcsA-mcsB-clpC	SAUSA300_0507,SAUSA300_0508,SAUSA300_0509,SAUSA300_0510	2	4.513	2.05947	0.360689
folE2-bshB2-SAUSA300_0553	SAUSA300_0551,SAUSA300_0552,SAUSA300_0553	0	1.932	0	0.361688
hlgC-hlgB	SAUSA300_2366,SAUSA300_2367	0	1.926	0	0.362435
lukD-lukE	SAUSA300_1768,SAUSA300_1769	0	1.92	0	0.363184
capA-capB-capC-capD-capE-capF-capG-capH-capI-capJ-capK-capL-capM-capN-capO-capP	SAUSA300_0152,SAUSA300_0153,SAUSA300_0154,SAUSA300_0155,SAUSA300_0156,SAUSA300_0157,SAUSA300_0158,SAUSA300_0159,SAUSA300_0160,SAUSA300_0161,SAUSA300_0162,SAUSA300_0163,SAUSA300_0164,SAUSA300_0165,SAUSA300_0166,SAUSA300_0167	2	16.569	0.560951	0.363345
sepA-sdrM	SAUSA300_2127,SAUSA300_2128	0	1.915	0	0.36381
icaB-icaC	SAUSA300_2601,SAUSA300_2602	0	1.911	0	0.364312
truB-ribC	SAUSA300_1164,SAUSA300_1165	0	1.903	0	0.365318
SAUSA300_2213-femX	SAUSA300_2213,SAUSA300_2214	2	4.549	2.04317	0.365428
SAUSA300_0442-SAUSA300_0443	SAUSA300_0442,SAUSA300_0443	0	1.891	0	0.366835
nos-pheA	SAUSA300_1895,SAUSA300_1896	0	1.89	0	0.366962
SAUSA300_2322-cobI	SAUSA300_2322,SAUSA300_2323	1	1.613	2.88109	0.367558
mepR-mepA	SAUSA300_0334,SAUSA300_0335	0	1.881	0	0.368106
lpl7-lpl8	SAUSA300_0417,SAUSA300_0418	1	1.619	2.87041	0.368992
SAUSA300_1321-cvfC-SAUSA300_1323	SAUSA300_1321,SAUSA300_1322,SAUSA300_1323	0	1.866	0	0.370024
SAUSA300_2377-SAUSA300_2378	SAUSA300_2377,SAUSA300_2378	0	1.861	0	0.370667
SAUSA300_2334-SAUSA300_2335-SAUSA300_2336	SAUSA300_2334,SAUSA300_2335,SAUSA300_2336	1	1.633	2.8458	0.372338
tilS-hprT	SAUSA300_0487,SAUSA300_0488	0	1.839	0	0.373512
pitR-pitA	SAUSA300_0649,SAUSA300_0650	1	1.64	2.83366	0.37401
rpsB-tsf	SAUSA300_1149,SAUSA300_1150	0	1.83	0	0.374684
acuA-acuC	SAUSA300_1680,SAUSA300_1681	0	1.826	0	0.375207
SAUSA300_0464-SAUSA300_0465-rsmI	SAUSA300_0464,SAUSA300_0465,SAUSA300_0466	0	1.807	0	0.377705
queE-queD-queC	SAUSA300_0695,SAUSA300_0696,SAUSA300_0697	0	1.806	0	0.377837
accA-accD	SAUSA300_1646,SAUSA300_1647	0	1.801	0	0.378498
SAUSA300_2556-SAUSA300_2557-nsaS-nsaR-SAUSA300_2560	SAUSA300_2556,SAUSA300_2557,SAUSA300_2558,SAUSA300_2559,SAUSA300_2560	2	4.649	1.99922	0.378653
SAUSA300_0938-tarM	SAUSA300_0938,SAUSA300_0939	0	1.774	0	0.382099
SAUSA300_0981-SAUSA300_0982	SAUSA300_0981,SAUSA300_0982	0	1.768	0	0.382905
SAUSA300_1684-SAUSA300_1685	SAUSA300_1684,SAUSA300_1685	0	1.764	0	0.383444
airR-airS	SAUSA300_1798,SAUSA300_1799	0	1.757	0	0.38439
SAUSA300_1215-cls1	SAUSA300_1215,SAUSA300_1216	0	1.736	0	0.387248
SAUSA300_0957-SAUSA300_0958	SAUSA300_0957,SAUSA300_0958	0	1.735	0	0.387385
glnR-glnA	SAUSA300_1200,SAUSA300_1201	0	1.727	0	0.388482
SAUSA300_0666-SAUSA300_0667-SAUSA300_0668	SAUSA300_0666,SAUSA300_0667,SAUSA300_0668	0	1.712	0	0.390552
SAUSA300_0846-SAUSA300_0847	SAUSA300_0846,SAUSA300_0847	0	1.709	0	0.390967
SAUSA300_2102-SAUSA300_2103	SAUSA300_2102,SAUSA300_2103	0	1.707	0	0.391245
SAUSA300_0659-SAUSA300_0660	SAUSA300_0659,SAUSA300_0660	0	1.705	0	0.391523
SAUSA300_0701-SAUSA300_0702	SAUSA300_0701,SAUSA300_0702	0	1.698	0	0.392497
SAUSA300_0866-spsA-spsB	SAUSA300_0866,SAUSA300_0867,SAUSA300_0868	0	1.695	0	0.392916
hrtA-htrB	SAUSA300_2306,SAUSA300_2307	1	1.72	2.70186	0.393077
SAUSA300_1314-crr-msrB-msrA1	SAUSA300_1314,SAUSA300_1315,SAUSA300_1316,SAUSA300_1317	0	1.687	0	0.394036
SAUSA300_0576-SAUSA300_0577	SAUSA300_0576,SAUSA300_0577	1	1.725	2.69403	0.394267
SAUSA300_1342-nth-dnaD	SAUSA300_1342,SAUSA300_1343,SAUSA300_1344	0	1.681	0	0.394878
SAUSA300_0091-SAUSA300_0092	SAUSA300_0091,SAUSA300_0092	0	1.674	0	0.395865
SAUSA300_0308-SAUSA300_0309	SAUSA300_0308,SAUSA300_0309	1	1.739	2.67234	0.397594
SAUSA300_1607-radC-comC	SAUSA300_1607,SAUSA300_1608,SAUSA300_1609	1	1.742	2.66774	0.398307
efp-pepQ2	SAUSA300_1490,SAUSA300_1491	0	1.644	0	0.400134
SAUSA300_2216-SAUSA300_2217	SAUSA300_2216,SAUSA300_2217	0	1.644	0	0.400134
galE-SAUSA300_0131	SAUSA300_0130,SAUSA300_0131	0	1.635	0	0.401427
rbgA-rnhB	SAUSA300_1136,SAUSA300_1137	0	1.635	0	0.401427
SAUSA300_2451-SAUSA300_2452	SAUSA300_2451,SAUSA300_2452	0	1.62	0	0.403597
folP-folB-folK	SAUSA300_0492,SAUSA300_0493,SAUSA300_0494	0	1.619	0	0.403742
cspR-queG	SAUSA300_1805,SAUSA300_1806	0	1.602	0	0.406223
SAUSA300_1519-trmK	SAUSA300_1519,SAUSA300_1520	1	1.78	2.61078	0.407326
hepT-ubiE	SAUSA300_1359,SAUSA300_1360	0	1.563	0	0.411998
uppS-cdsA	SAUSA300_1153,SAUSA300_1154	0	1.559	0	0.412598
SAUSA300_1623-SAUSA300_1624	SAUSA300_1623,SAUSA300_1624	0	1.556	0	0.413048
splF-splE-splD-splC-splB-splA	SAUSA300_1753,SAUSA300_1754,SAUSA300_1755,SAUSA300_1756,SAUSA300_1757,SAUSA300_1758	2	4.915	1.89103	0.41423
ssl13-ssl14	SAUSA300_1060,SAUSA300_1061	0	1.545	0	0.414705
noc-gidB-gidA-trmE	SAUSA300_2643,SAUSA300_2644,SAUSA300_2645,SAUSA300_2646	2	4.924	1.88757	0.415443
SAUSA300_1795-SAUSA300_1796	SAUSA300_1795,SAUSA300_1796	0	1.537	0	0.415917
SAUSA300_2512-SAUSA300_2513-SAUSA300_2514	SAUSA300_2512,SAUSA300_2513,SAUSA300_2514	0	1.534	0	0.416372
eutD-lipL	SAUSA300_0570,SAUSA300_0571	1	1.825	2.54641	0.41798
SAUSA300_1706-SAUSA300_1707	SAUSA300_1706,SAUSA300_1707	0	1.513	0	0.419582
SAUSA300_0476-glmU	SAUSA300_0476,SAUSA300_0477	0	1.506	0	0.420661
mhqE-mhqD	SAUSA300_2457,SAUSA300_2458	0	1.487	0	0.423608
SAUSA300_1018-SAUSA300_1019	SAUSA300_1018,SAUSA300_1019	0	1.487	0	0.423608
SAUSA300_2453-SAUSA300_2454	SAUSA300_2453,SAUSA300_2454	0	1.467	0	0.426744
deoC1-deoB	SAUSA300_0140,SAUSA300_0141	1	1.868	2.48779	0.428134
epiG-epiE-epiF-epiP-epiD-epiC-epiB-epiA	SAUSA300_1760,SAUSA300_1761,SAUSA300_1762,SAUSA300_1763,SAUSA300_1764,SAUSA300_1765,SAUSA300_1766,SAUSA300_1767	3	8.523	1.63576	0.429154
pdxS-pdxT	SAUSA300_0504,SAUSA300_0505	0	1.451	0	0.429278
SAUSA300_0429-SAUSA300_0430	SAUSA300_0429,SAUSA300_0430	0	1.445	0	0.430235
rnmV-ksgA	SAUSA300_0469,SAUSA300_0470	0	1.44	0	0.431034
SAUSA300_1462-SAUSA300_1463	SAUSA300_1462,SAUSA300_1463	0	1.431	0	0.432478
SAUSA300_2398-SAUSA300_2399	SAUSA300_2398,SAUSA300_2399	0	1.431	0	0.432478
murI-SAUSA300_1050-SAUSA300_1051	SAUSA300_1049,SAUSA300_1050,SAUSA300_1051	1	1.895	2.45235	0.434496
lspA-SAUSA300_1090	SAUSA300_1089,SAUSA300_1090	0	1.408	0	0.436203
ctaB-ctaM	SAUSA300_1016,SAUSA300_1017	0	1.397	0	0.438002
mutS-mutL-glpP	SAUSA300_1188,SAUSA300_1189,SAUSA300_1190	2	5.092	1.82529	0.438175
rnjA-rpoY	SAUSA300_0989,SAUSA300_0990	1	1.915	2.42673	0.439201
queF-SAUSA300_0714	SAUSA300_0713,SAUSA300_0714	0	1.386	0	0.439812
xerD-fur	SAUSA300_1447,SAUSA300_1448	0	1.385	0	0.439977
trmB-SAUSA300_1695	SAUSA300_1694,SAUSA300_1695	0	1.384	0	0.440142
galM-SAUSA300_2286	SAUSA300_2285,SAUSA300_2286	0	1.375	0	0.441633
asp23-SAUSA300_2143-amaP	SAUSA300_2142,SAUSA300_2143,SAUSA300_2144	0	1.372	0	0.442132
mreD-mreC	SAUSA300_1604,SAUSA300_1605	0	1.372	0	0.442132
SAUSA300_pUSA030034-SAUSA300_pUSA030035	SAUSA300_pUSA030034,SAUSA300_pUSA030035	0	1.372	0	0.442132
SAUSA300_1523-ccpN	SAUSA300_1523,SAUSA300_1524	0	1.368	0	0.442799
SAUSA300_1997-SAUSA300_1998	SAUSA300_1997,SAUSA300_1998	0	1.363	0	0.443634
nreC-nreB-nreA-narI-narJ-narH-narG	SAUSA300_2337,SAUSA300_2338,SAUSA300_2339,SAUSA300_2340,SAUSA300_2341,SAUSA300_2342,SAUSA300_2343	3	8.682	1.6058	0.44538
SAUSA300_0233-hmp	SAUSA300_0233,SAUSA300_0234	0	1.344	0	0.44683
perR-SAUSA300_1843-SAUSA300_1844	SAUSA300_1842,SAUSA300_1843,SAUSA300_1844	1	1.954	2.3783	0.448358
fakB2-dfrA	SAUSA300_1318,SAUSA300_1319	0	1.333	0	0.448697
SAUSA300_pUSA030021-SAUSA300_pUSA030022	SAUSA300_pUSA030021,SAUSA300_pUSA030022	0	1.326	0	0.449891
rplK-rplA	SAUSA300_0522,SAUSA300_0523	0	1.322	0	0.450575
czrA-czrB	SAUSA300_2098,SAUSA300_2099	0	1.302	0	0.454023
SAUSA300_1906-SAUSA300_1907-SAUSA300_1908	SAUSA300_1906,SAUSA300_1907,SAUSA300_1908	1	1.98	2.34707	0.454449
pyrH-frr	SAUSA300_1151,SAUSA300_1152	0	1.295	0	0.45524
ptsH-ptsI	SAUSA300_0983,SAUSA300_0984	1	1.987	2.3388	0.456087
SAUSA300_0275-SAUSA300_0276	SAUSA300_0275,SAUSA300_0276	0	1.274	0	0.45892
dck-dgk	SAUSA300_0541,SAUSA300_0542	0	1.272	0	0.459273
ugpQ-maoC	SAUSA300_0030,SAUSA300_0031	0	1.268	0	0.45998
SAUSA300_0056-SAUSA300_0057-SAUSA300_0058-SAUSA300_0059	SAUSA300_0056,SAUSA300_0057,SAUSA300_0058,SAUSA300_0059	0	1.267	0	0.460157
gpsB-SAUSA300_1338-SAUSA300_1339	SAUSA300_1337,SAUSA300_1338,SAUSA300_1339	0	1.264	0	0.460689
panD-panC-panB	SAUSA300_2532,SAUSA300_2533,SAUSA300_2534	1	2.02	2.30059	0.463798
SAUSA300_0674-SAUSA300_0675	SAUSA300_0674,SAUSA300_0675	0	1.23	0	0.466786
SAUSA300_1733-rppH	SAUSA300_1733,SAUSA300_1734	0	1.23	0	0.466786
bioX-bioW-bioF-bioB-bioA-bioD	SAUSA300_2368,SAUSA300_2369,SAUSA300_2370,SAUSA300_2371,SAUSA300_2372,SAUSA300_2373	2	5.305	1.75201	0.467219
SAUSA300_0393-SAUSA300_0394	SAUSA300_0393,SAUSA300_0394	0	1.223	0	0.468057
SAUSA300_0579-SAUSA300_0580	SAUSA300_0579,SAUSA300_0580	1	2.039	2.27915	0.468229
hssR-hssS	SAUSA300_2308,SAUSA300_2309	1	2.04	2.27804	0.468462
mecR1-rplL	SAUSA300_0033,SAUSA300_0035	0	1.218	0	0.468968
arsR-arsB-arsC	SAUSA300_1717,SAUSA300_1718,SAUSA300_1719	1	2.052	2.26471	0.471258
SAUSA300_0655-SAUSA300_0656	SAUSA300_0655,SAUSA300_0656	0	1.189	0	0.474311
SAUSA300_1859-ampS-SAUSA300_1861	SAUSA300_1859,SAUSA300_1860,SAUSA300_1861	1	2.079	2.2353	0.477538
rplT-rpmI-infC	SAUSA300_1625,SAUSA300_1626,SAUSA300_1627	0	1.159	0	0.479943
lrgA-lrgB	SAUSA300_0256,SAUSA300_0257	0	1.137	0	0.484142
SAUSA300_2287-SAUSA300_2288	SAUSA300_2287,SAUSA300_2288	1	2.124	2.18794	0.487977
rpsF-ssb-rpsR	SAUSA300_0366,SAUSA300_0367,SAUSA300_0368	0	1.114	0	0.488598
SAUSA300_1770-SAUSA300_1771	SAUSA300_1770,SAUSA300_1771	0	1.109	0	0.489576
cap1C-cap1B-cap1A	SAUSA300_2596,SAUSA300_2597,SAUSA300_2598	1	2.135	2.17667	0.490523
SAUSA300_pUSA030004-SAUSA300_pUSA030005	SAUSA300_pUSA030004,SAUSA300_pUSA030005	0	1.102	0	0.49095
SAUSA300_2624-SAUSA300_2625	SAUSA300_2624,SAUSA300_2625	0	1.095	0	0.492331
SAUSA300_1210-SAUSA300_1211-SAUSA300_1212-SAUSA300_1213	SAUSA300_1210,SAUSA300_1211,SAUSA300_1212,SAUSA300_1213	0	1.084	0	0.494513
srtB-isdG	SAUSA300_1034,SAUSA300_1035	0	1.076	0	0.496111
SAUSA300_2496-SAUSA300_2497	SAUSA300_2496,SAUSA300_2497	1	2.175	2.13664	0.499763
SAUSA300_1303-SAUSA300_1304	SAUSA300_1303,SAUSA300_1304	0	1.041	0	0.503204
ung-SAUSA300_0564	SAUSA300_0563,SAUSA300_0564	0	1.037	0	0.504026
fabH-fabF	SAUSA300_0885,SAUSA300_0886	1	2.197	2.11525	0.504832
rsmD-coaD	SAUSA300_1023,SAUSA300_1024	0	1.026	0	0.506297
SAUSA300_0832-nagD-SAUSA300_0834	SAUSA300_0832,SAUSA300_0833,SAUSA300_0834	1	2.205	2.10757	0.506674
SAUSA300_0010-SAUSA300_0011	SAUSA300_0010,SAUSA300_0011	0	1.021	0	0.507336
tauE-cstR	SAUSA300_0083,SAUSA300_0084	0	1.015	0	0.508586
SAUSA300_0293-SAUSA300_0294	SAUSA300_0293,SAUSA300_0294	0	1.011	0	0.509423
SAUSA300_1741-SAUSA300_1742-SAUSA300_1743	SAUSA300_1741,SAUSA300_1742,SAUSA300_1743	0	1.011	0	0.509423
feoB-feoA	SAUSA300_2487,SAUSA300_2488	1	2.233	2.08114	0.513108
SAUSA300_0792-SAUSA300_0793	SAUSA300_0792,SAUSA300_0793	0	0.993	0	0.513218
cls2-SAUSA300_2045	SAUSA300_2044,SAUSA300_2045	1	2.234	2.08021	0.513338
ackA-SAUSA300_1658	SAUSA300_1657,SAUSA300_1658	1	2.237	2.07742	0.514026
atpE-atpB	SAUSA300_2063,SAUSA300_2064	0	0.983	0	0.515348
SAUSA300_0259-bglA	SAUSA300_0259,SAUSA300_0260	1	2.243	2.07187	0.515402
nfo-cshB	SAUSA300_1517,SAUSA300_1518	1	2.246	2.0691	0.51609
msrA3-SAUSA300_2595	SAUSA300_2594,SAUSA300_2595	0	0.979	0	0.516204
dsbA-SAUSA300_2355	SAUSA300_2354,SAUSA300_2355	0	0.965	0	0.519222
dat-SAUSA300_1697	SAUSA300_1696,SAUSA300_1697	1	2.261	2.05537	0.519528
mnmA-iscS	SAUSA300_1578,SAUSA300_1579	1	2.261	2.05537	0.519528
SAUSA300_2522-SAUSA300_2523-SAUSA300_2524	SAUSA300_2522,SAUSA300_2523,SAUSA300_2524	0	0.945	0	0.523585
tatC-tatA	SAUSA300_0347,SAUSA300_0348	0	0.942	0	0.524245
rpmA-SAUSA300_1602-rplU	SAUSA300_1601,SAUSA300_1602,SAUSA300_1603	0	0.93	0	0.526901
rplJ-rplL	SAUSA300_0524,SAUSA300_0525	0	0.911	0	0.531154
SAUSA300_2294-SAUSA300_2295	SAUSA300_2294,SAUSA300_2295	0	0.907	0	0.532057
recQ2-SAUSA300_1372	SAUSA300_1371,SAUSA300_1372	1	2.322	2.00138	0.53346
SAUSA300_2310-SAUSA300_2311	SAUSA300_2310,SAUSA300_2311	0	0.895	0	0.534784
SAUSA300_0295-SAUSA300_0296	SAUSA300_0295,SAUSA300_0296	0	0.888	0	0.536386
SAUSA300_pUSA030023-SAUSA300_pUSA030024	SAUSA300_pUSA030023,SAUSA300_pUSA030024	0	0.879	0	0.538459
SAUSA300_0440-SAUSA300_0441	SAUSA300_0440,SAUSA300_0441	0	0.87	0	0.540547
SAUSA300_2419-SAUSA300_2420	SAUSA300_2419,SAUSA300_2420	0	0.856	0	0.543824
rpsI-rplM	SAUSA300_2171,SAUSA300_2172	0	0.849	0	0.545476
yajC-tgt-queA-ruvB-ruvA-thrR-obgE	SAUSA300_1594,SAUSA300_1595,SAUSA300_1596,SAUSA300_1597,SAUSA300_1598,SAUSA300_1599,SAUSA300_1600	2	5.88	1.58068	0.546438
gmk-rpoZ	SAUSA300_1102,SAUSA300_1103	0	0.841	0	0.547376
SAUSA300_0806-SAUSA300_0807-SAUSA300_0808	SAUSA300_0806,SAUSA300_0807,SAUSA300_0808	0	0.837	0	0.54833
rumA-dgkB	SAUSA300_1878,SAUSA300_1879	1	2.389	1.94525	0.548677
SAUSA300_2641-SAUSA300_2642	SAUSA300_2641,SAUSA300_2642	0	0.816	0	0.553393
SAUSA300_1492-SAUSA300_1493	SAUSA300_1492,SAUSA300_1493	0	0.813	0	0.554123
SAUSA300_1026-rpmF	SAUSA300_1026,SAUSA300_1027	0	0.81	0	0.554855
miaB-SAUSA300_1186-SAUSA300_1187	SAUSA300_1185,SAUSA300_1186,SAUSA300_1187	1	2.428	1.914	0.557492
SAUSA300_2474-SAUSA300_2475	SAUSA300_2474,SAUSA300_2475	0	0.796	0	0.558296
SAUSA300_0931-SAUSA300_0932	SAUSA300_0931,SAUSA300_0932	0	0.793	0	0.559039
citC-citZ	SAUSA300_1640,SAUSA300_1641	1	2.438	1.90615	0.559747
fruC-scrB	SAUSA300_1993,SAUSA300_1994	1	2.44	1.90459	0.560198
SAUSA300_2447-SAUSA300_2448	SAUSA300_2447,SAUSA300_2448	1	2.447	1.89914	0.561775
SAUSA300_1803-SAUSA300_1804	SAUSA300_1803,SAUSA300_1804	0	0.776	0	0.563284
mtaB-rsmE-prmA-dnaJ-dnaK-grpE-hrcA	SAUSA300_1536,SAUSA300_1537,SAUSA300_1538,SAUSA300_1539,SAUSA300_1540,SAUSA300_1541,SAUSA300_1542	1	7.86	0.591246	0.563781
lpl1-SAUSA300_0411-SAUSA300_0412	SAUSA300_0410,SAUSA300_0411,SAUSA300_0412	1	2.46	1.8891	0.564702
menC-menE	SAUSA300_1735,SAUSA300_1737	1	2.484	1.87085	0.570095
ptpA-SAUSA300_1863	SAUSA300_1862,SAUSA300_1863	0	0.746	0	0.570928
mntC-mntB-mntA	SAUSA300_0618,SAUSA300_0619,SAUSA300_0620	1	2.499	1.85962	0.573459
SAUSA300_0599-SAUSA300_0600-SAUSA300_0601	SAUSA300_0599,SAUSA300_0600,SAUSA300_0601	1	2.508	1.85295	0.575475
isdI-SAUSA300_0169	SAUSA300_0168,SAUSA300_0169	0	0.716	0	0.578777
hemL-hemB-hemD-hemC-hemX-hemA	SAUSA300_1614,SAUSA300_1615,SAUSA300_1616,SAUSA300_1617,SAUSA300_1618,SAUSA300_1619	2	6.152	1.51079	0.584105
SAUSA300_0794-SAUSA300_0795	SAUSA300_0794,SAUSA300_0795	0	0.675	0	0.589861
SAUSA300_2020-SAUSA300_2021	SAUSA300_2020,SAUSA300_2021	1	2.598	1.78876	0.595543
SAUSA300_1488-SAUSA300_1489	SAUSA300_1488,SAUSA300_1489	0	0.636	0	0.600814
trnaK-trnaQ-trnaY-trnaV-trnaE-trnaN-rrfF	SAUSA300_2116,SAUSA300_2117,SAUSA300_2118,SAUSA300_2119,SAUSA300_2120,SAUSA300_2121,SAUSA300_2122	0	0.631	0	0.602249
sdaAA-sdaAB-SAUSA300_2471	SAUSA300_2469,SAUSA300_2470,SAUSA300_2471	1	2.639	1.76097	0.604627
sspC-sspB-sspA	SAUSA300_0949,SAUSA300_0950,SAUSA300_0951	1	2.64	1.7603	0.604848
graX-graR-graS	SAUSA300_0644,SAUSA300_0645,SAUSA300_0646	1	2.646	1.75631	0.606174
SAUSA300_0842-sufA	SAUSA300_0842,SAUSA300_0843	0	0.608	0	0.608944
trnaE-trnaN-trnaG-trnaH-trnaF-trnaD-trnaM	SAUSA300_1773,SAUSA300_1774,SAUSA300_1775,SAUSA300_1776,SAUSA300_1777,SAUSA300_1778,SAUSA300_1779	0	0.599	0	0.611608
sigB-rsbW-rsbV-rsbU	SAUSA300_2022,SAUSA300_2023,SAUSA300_2024,SAUSA300_2025	1	2.672	1.73922	0.611911
malA-malR	SAUSA300_1456,SAUSA300_1457	1	2.684	1.73144	0.614553
SAUSA300_1301-SAUSA300_1302	SAUSA300_1301,SAUSA300_1302	1	2.691	1.72694	0.616094
SAUSA300_1669-serA	SAUSA300_1669,SAUSA300_1670	1	2.751	1.68927	0.629249
lpl9-SAUSA300_0420-SAUSA300_0421-SAUSA300_0422	SAUSA300_0419,SAUSA300_0420,SAUSA300_0421,SAUSA300_0422	1	2.783	1.66985	0.636232
SAUSA300_2352-SAUSA300_2353	SAUSA300_2352,SAUSA300_2353	0	0.517	0	0.637114
dnaI-dnaB-nrdR	SAUSA300_1630,SAUSA300_1631,SAUSA300_1632	1	2.791	1.66506	0.637974
SAUSA300_2042-SAUSA300_2043	SAUSA300_2042,SAUSA300_2043	0	0.514	0	0.638093
SAUSA300_0804-SAUSA300_0805	SAUSA300_0804,SAUSA300_0805	0	0.507	0	0.640391
addB-addA	SAUSA300_0869,SAUSA300_0870	1	7.13	0.65178	0.644151
SAUSA300_0767-SAUSA300_0768	SAUSA300_0767,SAUSA300_0768	0	0.485	0	0.647741
SAUSA300_0900-trfB-pepF	SAUSA300_0900,SAUSA300_0901,SAUSA300_0902	1	2.841	1.63576	0.648829
fhuC-fhuB-fhuG	SAUSA300_0633,SAUSA300_0634,SAUSA300_0635	1	2.85	1.63059	0.650776
SAUSA300_0197-SAUSA300_0198-SAUSA300_0199	SAUSA300_0197,SAUSA300_0198,SAUSA300_0199	1	2.866	1.62149	0.654234
SAUSA300_0607-SAUSA300_0608	SAUSA300_0607,SAUSA300_0608	0	0.444	0	0.661997
hsdS2-hsdM2	SAUSA300_1751,SAUSA300_1752	1	2.931	1.58553	0.668221
ccrB-ccrA	SAUSA300_0037,SAUSA300_0038	1	2.999	1.54958	0.682747
SAUSA300_1581-csbD	SAUSA300_1581,SAUSA300_1582	0	0.368	0	0.690643
aspS-hisS	SAUSA300_1586,SAUSA300_1587	1	3.044	1.52667	0.692299
comGD-comGC-comGB-comGA-SAUSA300_1505-SAUSA300_1506-glk-SAUSA300_1508-SAUSA300_1509-SAUSA300_1510	SAUSA300_1501,SAUSA300_1502,SAUSA300_1503,SAUSA300_1504,SAUSA300_1505,SAUSA300_1506,SAUSA300_1507,SAUSA300_1508,SAUSA300_1509,SAUSA300_1510	2	6.947	1.3379	0.693804
psmβ1-psmβ2	SAUSA300_1067,SAUSA300_1068	0	0.325	0	0.708399
SAUSA300_0146-SAUSA300_0147	SAUSA300_0146,SAUSA300_0147	1	3.13	1.48473	0.71042
SAUSA300_0609-mnhA2-mnhB2-mnhC2-mnhD2-mnhE2-mnhF2-mnhG2	SAUSA300_0609,SAUSA300_0610,SAUSA300_0611,SAUSA300_0612,SAUSA300_0613,SAUSA300_0614,SAUSA300_0615,SAUSA300_0616	1	6.414	0.724539	0.732964
SAUSA300_0311-psuG-SAUSA300_0313	SAUSA300_0311,SAUSA300_0312,SAUSA300_0313	1	3.247	1.43123	0.734786
sdhC-sdhA-sdhB	SAUSA300_1046,SAUSA300_1047,SAUSA300_1048	1	3.247	1.43123	0.734786
opp-2F-opp-2D-opp-2C-opp-2B	SAUSA300_1273,SAUSA300_1274,SAUSA300_1275,SAUSA300_1276	1	3.263	1.42421	0.738092
mraY-murD-divIB-ftsA-ftsZ	SAUSA300_1076,SAUSA300_1077,SAUSA300_1078,SAUSA300_1079,SAUSA300_1080	1	6.374	0.729086	0.738236
lacG-lacE-lacF-lacD-lacC-lacB-lacA	SAUSA300_2149,SAUSA300_2150,SAUSA300_2151,SAUSA300_2152,SAUSA300_2153,SAUSA300_2154,SAUSA300_2155	1	6.369	0.729658	0.738897
truA-ecfT-cbiO1-cbiO	SAUSA300_2173,SAUSA300_2174,SAUSA300_2175,SAUSA300_2176	1	3.27	1.42116	0.739537
murE-SAUSA300_0920-prfC	SAUSA300_0919,SAUSA300_0920,SAUSA300_0921	1	3.287	1.41381	0.74304
kdpD-kdpE	SAUSA300_2035,SAUSA300_2036	1	3.352	1.38639	0.756369
SAUSA300_0879-SAUSA300_0880-SAUSA300_0881-SAUSA300_0882	SAUSA300_0879,SAUSA300_0880,SAUSA300_0881,SAUSA300_0882	1	3.38	1.37491	0.762078
rrfC-trnaA	SAUSA300_0497,SAUSA300_0498	0	0.202	0	0.76811
trnaL-SAUSA300_1812	SAUSA300_1811,SAUSA300_1812	0	0.196	0	0.771483
SAUSA300_2257-fdhA	SAUSA300_2257,SAUSA300_2258	1	3.427	1.35605	0.771619
vraD-vraE-SAUSA300_2635-SAUSA300_2636	SAUSA300_2633,SAUSA300_2634,SAUSA300_2635,SAUSA300_2636	1	3.46	1.34312	0.778285
trnaG-trnaL	SAUSA300_2018,SAUSA300_2019	0	0.178	0	0.781951
SAUSA300_1851-SAUSA300_1852-SAUSA300_1853-recX	SAUSA300_1851,SAUSA300_1852,SAUSA300_1853,SAUSA300_1854	1	3.487	1.33272	0.783719
dinG-birA-papS-bshA	SAUSA300_1346,SAUSA300_1347,SAUSA300_1348,SAUSA300_1349	1	6.024	0.771447	0.785822
SAUSA300_1839-SAUSA300_1840	SAUSA300_1839,SAUSA300_1840	0	0.17	0	0.786787
opuCD-opuCC-opuCB-opuCA	SAUSA300_2390,SAUSA300_2391,SAUSA300_2392,SAUSA300_2393	1	3.511	1.32361	0.788534
SAUSA300_0003-recF-gyrB-gyrA	SAUSA300_0003,SAUSA300_0004,SAUSA300_0005,SAUSA300_0006	1	5.998	0.774791	0.789463
trnaS-trnaN	SAUSA300_0926,SAUSA300_0927	0	0.165	0	0.789871
ssuB-ssuA-ssuC-SAUSA300_0177	SAUSA300_0174,SAUSA300_0175,SAUSA300_0176,SAUSA300_0177	1	3.53	1.31649	0.792335
trnaE-trnaD	SAUSA300_0018,SAUSA300_0019	0	0.154	0	0.796838
phnE1-phnE2-phnC-phnD	SAUSA300_0142,SAUSA300_0143,SAUSA300_0144,SAUSA300_0145	1	3.557	1.30649	0.797722
SAUSA300_0906-relQ-ppnK-SAUSA300_0909-mgtE-cpaA	SAUSA300_0906,SAUSA300_0907,SAUSA300_0908,SAUSA300_0909,SAUSA300_0910,SAUSA300_0911	1	5.936	0.782883	0.798206
SAUSA300_1329-ilvA1-ald1	SAUSA300_1329,SAUSA300_1330,SAUSA300_1331	1	3.606	1.28874	0.807452
isdC-isdD-isdE-isdF	SAUSA300_1030,SAUSA300_1031,SAUSA300_1032,SAUSA300_1033	1	3.612	1.2866	0.808639
mnhG-mnhF-mnhE-mnhD-mnhC-mnhB-mnhA	SAUSA300_0849,SAUSA300_0850,SAUSA300_0851,SAUSA300_0852,SAUSA300_0853,SAUSA300_0854,SAUSA300_0855	1	5.764	0.806245	0.822909
fepA-fepB-fepC	SAUSA300_0344,SAUSA300_0345,SAUSA300_0346	1	3.773	1.2317	0.840162
sstA-sstB-sstC-sstD	SAUSA300_0718,SAUSA300_0719,SAUSA300_0720,SAUSA300_0721	1	3.819	1.21686	0.84905
opp-4A-opp-4D-opp-4F-opp-4B-opp-4C	SAUSA300_0892,SAUSA300_0893,SAUSA300_0894,SAUSA300_0895,SAUSA300_0896	1	5.583	0.832383	0.849625
spoIIIE-SAUSA300_1170-SAUSA300_1171-SAUSA300_1172-SAUSA300_1173-SAUSA300_1174-SAUSA300_1175-pgsA	SAUSA300_1169,SAUSA300_1170,SAUSA300_1171,SAUSA300_1172,SAUSA300_1173,SAUSA300_1174,SAUSA300_1175,SAUSA300_1176	2	8.202	1.13319	0.862074
murC-ftsK-SAUSA300_1688-SAUSA300_1689-SAUSA300_1690-SAUSA300_1691	SAUSA300_1686,SAUSA300_1687,SAUSA300_1688,SAUSA300_1689,SAUSA300_1690,SAUSA300_1691	2	8.216	1.13125	0.863899
SAUSA300_0998-potA-potB-potC-potD-SAUSA300_1003	SAUSA300_0998,SAUSA300_0999,SAUSA300_1000,SAUSA300_1001,SAUSA300_1002,SAUSA300_1003	1	5.417	0.857891	0.874788
mraZ-mraW-ftsL-pbp1	SAUSA300_1072,SAUSA300_1073,SAUSA300_1074,SAUSA300_1075	1	4.012	1.15832	0.885759
sfnaC-sfnaB-sfnaA	SAUSA300_2137,SAUSA300_2138,SAUSA300_2139	1	4.014	1.15775	0.886135
SAUSA300_2616-SAUSA300_2617-SAUSA300_2618-SAUSA300_2619	SAUSA300_2616,SAUSA300_2617,SAUSA300_2618,SAUSA300_2619	1	4.026	1.1543	0.888386
rplY-pth-mfd-SAUSA300_0482-SAUSA300_0483-SAUSA300_0484-divIC	SAUSA300_0479,SAUSA300_0480,SAUSA300_0481,SAUSA300_0482,SAUSA300_0483,SAUSA300_0484,SAUSA300_0485	2	8.421	1.10372	0.890462
ulaA-SAUSA300_0331-SAUSA300_0332-SAUSA300_0333	SAUSA300_0330,SAUSA300_0331,SAUSA300_0332,SAUSA300_0333	1	4.05	1.14746	0.892877
alr-acpS-SAUSA300_2029-SAUSA300_2030-SAUSA300_2031	SAUSA300_2027,SAUSA300_2028,SAUSA300_2029,SAUSA300_2030,SAUSA300_2031	1	4.11	1.1307	0.904042
hom-thrC-thrB-SAUSA300_1229	SAUSA300_1226,SAUSA300_1227,SAUSA300_1228,SAUSA300_1229	1	4.124	1.12687	0.906634
sbcD-sbcC	SAUSA300_1242,SAUSA300_1243	1	4.154	1.11873	0.912172
cbf1-SAUSA300_1792-SAUSA300_1793	SAUSA300_1791,SAUSA300_1792,SAUSA300_1793	1	5.06	0.918418	0.931088
argB-argJ-argC-argD	SAUSA300_0184,SAUSA300_0185,SAUSA300_0186,SAUSA300_0187	1	4.287	1.08402	0.936453
kdpC-kdpB-kdpA	SAUSA300_2032,SAUSA300_2033,SAUSA300_2034	1	4.302	1.08024	0.939163
SAUSA300_0271-SAUSA300_0272-SAUSA300_0273-SAUSA300_0274	SAUSA300_0271,SAUSA300_0272,SAUSA300_0273,SAUSA300_0274	1	4.347	1.06906	0.947262
xpt-pbuX-guaB-guaA	SAUSA300_0386,SAUSA300_0387,SAUSA300_0388,SAUSA300_0389	1	4.916	0.94532	0.954657
fadD-fadE-fadX	SAUSA300_0227,SAUSA300_0228,SAUSA300_0229	1	4.431	1.04879	0.962244
SAUSA300_2575-manP-pmi	SAUSA300_2575,SAUSA300_2576,SAUSA300_2577	1	4.855	0.957198	0.964792
SAUSA300_0013-gdpP-rplI-dnaC	SAUSA300_0013,SAUSA300_0014,SAUSA300_0015,SAUSA300_0016	1	4.795	0.969175	0.97485
gntP-gntK-gntR-SAUSA300_2445	SAUSA300_2442,SAUSA300_2443,SAUSA300_2444,SAUSA300_2445	1	4.65	0.999397	0.999518
