# Supplementary material for: Niche-specific genome degradation and convergent evolution shaping Staphylococcus aureus adaptation during severe infections
Source: eLife journal article supplement (doi:10.7554/elife.77195), 2022-06-08
Supplement: supp [file elife-77195-supp-v1.zip › elife_poa_e77195_Supplementary_file_6.xlsx]

## Sheet: all
Gene set enrichment analysis (complete dataset)
GO term	size of the GO set	Enrichment score	Normalised enrichment score (NES)	unadjusted p value	FDR-adjusted p value	Number of mutated genes in the set	Mutated genes
phosphorelay signal transduction system	33	0.706348	2.09147	0.000904858	0.0497672	5	agrA,saeR,walR,walK,vraS
plasma membrane	325	0.40781	1.38609	0.000508321	0.0497672	158	ebh,mprF,vraG,era,pbp2,walK,sbi,sgtB,spoIIIE,msa,mnhB,pstS,vraS,mnhE,comGB,mnhA2,secDF,atpH,SAUSA300_0866,SAUSA300_2384,copA,gltT,SAUSA300_0784,SAUSA300_2315,vraE,SAUSA300_0568,ulaA,brnQ1,gtfB,modB,lytS,comEC,tarL',ezrA,nptA,lmrS,cudT,glvC,pmtD,secE,opuD2,SAUSA300_1064,SAUSA300_0676,SAUSA300_0482,dtpT,ctpA,glcC,essC,mtlF,murP,scrA,SAUSA300_2627,SAUSA300_0914,proP,atpE,mgtE,uhpT,SAUSA300_2273,dnaA…
DNA binding	190	0.426078	1.41716	0.00487071	0.118411	35	agrA,saeR,accB,walR,purR,mgrA,greA,holA,rpoB,SAUSA300_2322,sarR,spoIIIE,SAUSA300_1247,recD2,priA,dinG,farR,SAUSA300_2547,topB,parE,vga,SAUSA300_0704,dnaG,hsdM2,hsdM1,SAUSA300_1204,sigB,essC,parC,dnaC,SAUSA300_0677,rpoZ,tnp3,ccrA,glnA
GTPase activity	17	0.732226	1.97927	0.00538232	0.118411	10	era,fusA,ureG,prfC,trmE,ffh,rsgA,ftsY,hflX,tuf
protein phosphopantetheinylation	18	0.696943	1.89564	0.00430909	0.118411	8	mprF,SAUSA300_0604,femX,sucB,bmfBB,femB,fmhA,fmhC
response to antibiotic	47	0.600405	1.83387	0.00747334	0.136787	18	mprF,rpoB,pbp2,rplC,walK,folP,fusA,sgtB,vraS,parE,lmrS,parC,uhpT,tet38,sdrM,murA1,femB,uppP
regulation of cell shape	25	0.57888	1.65012	0.00896444	0.136787	15	sgtB,murE,murF,glmU,murD,murT,murA1,femB,murA2,uppP,fmhA,fmhC,rodA,ddl,mraY
peptidyl-histidine phosphorylation	16	0.700073	1.87006	0.00994816	0.136787	5	agrC,walK,vraS,lytS,hptS
regulatory region nucleic acid binding	16	0.665944	1.77889	0.0117989	0.144209	4	saeR,walR,mgrA,sarR
phosphorelay response regulator activity	10	0.717221	1.77193	0.0151694	0.151694	3	saeR,walR,walK
DNA-directed DNA polymerase activity	11	0.692203	1.75017	0.0147377	0.151694	4	holA,dinG,SAUSA300_1875,SAUSA300_1259
ATP binding	297	0.37618	1.27287	0.0166719	0.152826	165	SAUSA300_2399,walK,clpX,thiM,recG,carB,nanK,spoIIIE,vraS,SAUSA300_2070,recD2,priA,carA,SAUSA300_0809,dinG,copA,parE,kdpB,udk,vga,SAUSA300_0704,ftsH,dnaG,SAUSA300_2094,sbcC,SAUSA300_0309,sbnC,lytS,SAUSA300_1847,recN,groEL,SAUSA300_2001,pyrG,vraD,SAUSA300_1852,sigB,cshA,lysS,murE,SAUSA300_2103,essC,gatA,gltX,parC,gatB,leuS,dnaC,thiW,radA,dnaA,murF,accC,murD,glnA,rho,murT,tilS,pycA,folC,argS,tyrS,pm…
magnesium ion binding	56	0.51934	1.59914	0.025974	0.191114	26	thiE,thiM,menC,ilvB,farR,topB,kdpB,recU,pgcA,menD,SAUSA300_0190,lysS,purF,murE,glmU,eno,budB,papS,metK,ribA,sucC,rpoC,rnhC,prs,pheS,fni
biosynthetic process	13	0.617793	1.6091	0.0295359	0.191114	8	aspB,menF,kbl,pabB,SAUSA300_2610,metX,SAUSA300_1025,patA
peptidoglycan biosynthetic process	22	0.577272	1.61676	0.0262892	0.191114	13	pbp2,sgtB,murE,murF,glmU,murD,murT,murA1,murA2,uppP,ddl,mraY,sgtA
transmembrane transport	147	0.413727	1.36399	0.026973	0.191114	68	SAUSA300_2399,vraG,mnhA2,gltT,vraE,modB,SAUSA300_1847,lmrS,cudT,cntA,pmtD,opuD2,SAUSA300_0073,SAUSA300_0676,opuBB,lysP,opp-5A,SAUSA300_1808,SAUSA300_2538,SAUSA300_2627,SAUSA300_0914,proP,uhpT,SAUSA300_2265,tet38,mntH,sdrM,SAUSA300_0432,SAUSA300_1329,pyrP,pbuX,sbnD,SAUSA300_0091,SAUSA300_2217,ltaA,SAUSA300_2406,pbuG,abcA,narK,SAUSA300_2451,SAUSA300_0881,kimA,pitA,htsC,isdF,opp-4B,opp-3B,phnD,SAUSA…
catalytic activity, acting on a protein	15	0.612961	1.619	0.0289555	0.191114	6	SAUSA300_0604,atpH,sucB,bmfBB,SAUSA300_1569,hmrA
GTP binding	29	0.542424	1.57927	0.0332032	0.202908	12	era,fusA,ureG,prfC,trmE,ffh,rsgA,ftsY,hflX,tuf,ribA,SAUSA300_1556
cellular amino acid biosynthetic process	14	0.600971	1.57877	0.0385016	0.222904	9	dat,ilvA2,purB,aroC,aroA2,aroB,arcB,argF,arcB
phosphorelay sensor kinase activity	14	0.596115	1.56601	0.0416233	0.223478	8	walK,vraS,lytS,hptS,hptR,SAUSA300_1219,hprK,gdpS
DNA biosynthetic process	14	0.593997	1.56045	0.0426639	0.223478	4	holA,dinG,SAUSA300_1875,SAUSA300_1259
carbohydrate transmembrane transport	26	0.511466	1.46696	0.0474268	0.226824	15	ulaA,glvC,glcC,mtlF,murP,scrA,SAUSA300_0240,SAUSA300_1809,SAUSA300_2507,SAUSA300_0310,SAUSA300_2575,SAUSA300_0333,rbsU,glcU,SAUSA300_0259
cell wall organization	43	0.475303	1.44069	0.045954	0.226824	29	sgtB,pbp3,lytS,murE,SAUSA300_0651,murF,glmU,murD,murT,murA1,femB,murA2,uppP,lytH,fmhA,fmhC,ddl,tagO,SAUSA300_1480,atl,msrR,mraY,gdpS,SAUSA300_0739,murI,SAUSA300_2256,tagA,tarI,SAUSA300_0958
DNA recombination	22	0.532834	1.4923	0.0515672	0.228571	12	recG,priA,recJ,recU,tkt,sbcC,recN,ccrA,int,sbcD,recA,ruvB
transmembrane transporter activity	65	0.436418	1.36328	0.0519481	0.228571	29	lmrS,cudT,opuD2,SAUSA300_0676,opuBB,SAUSA300_1808,SAUSA300_2538,SAUSA300_2627,proP,uhpT,tet38,sdrM,SAUSA300_1329,pyrP,pbuX,sbnD,SAUSA300_0091,SAUSA300_2217,ltaA,SAUSA300_2406,narK,SAUSA300_2451,SAUSA300_0881,kimA,htsC,isdF,phnD,SAUSA300_0599,opuCC
glutamine metabolic process	12	0.578271	1.48388	0.0584485	0.229619	4	carB,carA,pyrG,purF
pyridoxal phosphate binding	33	0.473169	1.40104	0.0581162	0.229619	11	dat,iscS,ilvA2,aspB,sufS,kbl,argD,metI,ilvA1,SAUSA300_2610,cysK
cation transmembrane transport	15	0.564858	1.49195	0.0548087	0.229619	10	mnhB,mnhE,copA,brnQ1,ktrD,brnQ3,ktrB,czrB,SAUSA300_0171,SAUSA300_2363
proteolysis	95	0.41013	1.31621	0.0619381	0.234937	32	SAUSA300_1856,SAUSA300_1613,pbp2,SAUSA300_0932,SAUSA300_1534,clpX,SAUSA300_0604,sgtB,SAUSA300_1278,atpH,pbp3,sasF,ftsH,pepF,est,ctpA,pepZ,SAUSA300_2335,epiP,radA,SAUSA300_1172,SAUSA300_1569,rasP,hmrA,sspB,SAUSA300_1890,SAUSA300_1691,pepQ2,hrcA,pepQ,SAUSA300_1261,gcp
integral component of plasma membrane	25	0.495269	1.41179	0.0684794	0.242991	15	tatC,mscL,kdpB,divIB,lctP1,arcD,arcD,nrgA,kdpA,pstA,nixA,menA,rarD,znuB,phnE1
sodium ion transport	13	0.561297	1.46195	0.0664557	0.242991	4	mnhB,mnhE,SAUSA300_2384,SAUSA300_0914
tRNA binding	24	0.472253	1.33925	0.0967742	0.24789	9	rpsJ,rnpA,SAUSA300_2070,SAUSA300_1101,gltX,thiI,papS,alaS,pheS
DNA repair	28	0.462322	1.34214	0.0936556	0.24789	12	recG,recJ,dinG,SAUSA300_1875,recU,sbcC,recN,SAUSA300_1259,nfo,sbcD,recA,ruvB
peptidase activity	24	0.478193	1.3561	0.0887097	0.24789	4	SAUSA300_1856,SAUSA300_0932,SAUSA300_1534,clpX
cation transmembrane transporter activity	14	0.54102	1.42128	0.0790843	0.24789	9	mnhB,mnhE,brnQ1,ktrD,brnQ3,ktrB,czrB,SAUSA300_0171,SAUSA300_2363
protein-N(PI)-phosphohistidine-sugar phosphotransferase activity	21	0.501658	1.39691	0.0729483	0.24789	12	ulaA,glvC,glcC,murP,scrA,SAUSA300_0240,SAUSA300_1809,SAUSA300_2507,SAUSA300_0310,SAUSA300_2575,SAUSA300_0333,SAUSA300_0259
menaquinone biosynthetic process	13	0.540436	1.40761	0.0833333	0.24789	6	menC,ilvB,menD,SAUSA300_0190,budB,ilvD
phosphoenolpyruvate-dependent sugar phosphotransferase system	32	0.459366	1.3533	0.0781563	0.24789	17	ulaA,ptsI,glvC,glcC,mtlF,murP,scrA,SAUSA300_0240,SAUSA300_1809,SAUSA300_2507,SAUSA300_0310,SAUSA300_2575,lacD,SAUSA300_0333,dhaM,ecfT,SAUSA300_0259
pathogenesis	86	0.389549	1.24113	0.0949051	0.24789	10	ebh,mprF,saeR,mgrA,sbi,sarR,isdB,psmβ2,sasA,ssl1
nickel cation transport	32	0.460801	1.35753	0.0771543	0.24789	18	modB,cntA,SAUSA300_0073,opuBB,SAUSA300_1808,pstA,opp-4B,opp-3B,cntB,opp-3B,opp-4C,cnzC,SAUSA300_0211,phnE1,cntD,potC,potB,opp-3C
hydrolase activity	134	0.36862	1.20783	0.0979021	0.24789	80	xpaC,SAUSA300_0604,ribD,SAUSA300_2020,SAUSA300_1247,SAUSA300_0809,atpH,pncA,sdrC,kdpB,SAUSA300_2267,comEC,vraD,SAUSA300_1852,sigB,SAUSA300_0042,SAUSA300_2103,gatA,atpE,cstB,SAUSA300_1569,pmtC,kdpA,int,SAUSA300_0871,fmtA,hmrA,SAUSA300_0534,SAUSA300_0641,SAUSA300_2517,SAUSA300_0044,ssuA,drp35,metX,SAUSA300_2473,sirTM,pde2,cbf1,hprK,htrB,SAUSA300_2296,SAUSA300_1194,SAUSA300_1565,SAUSA300_2148,atpG,S…
cell wall macromolecule biosynthetic process	12	0.537565	1.37942	0.0945802	0.24789	6	femX,tarL',femB,fmhA,fmhC,tagB
metal ion binding	164	0.360873	1.19386	0.0939061	0.24789	53	stp1,walK,folP,carB,SAUSA300_1278,tgt,iscS,gehB,copA,moeA,parE,isdB,tkt,pepF,ptsI,budA1,pyrG,panB,sdhB,mgtE,trmE,epiP,leuC,radA,cydA,accC,mntH,glnA,isdE,pdp,pycA,SAUSA300_1172,folC,SAUSA300_1171,rsgA,purD,hflX,ilvD,coaBC,SAUSA300_2086,rasP,hmrA,pfkA,SAUSA300_1858,purK,isdH,SAUSA300_1691,ddl,aroB,pepQ2,pepQ,mutY,SAUSA300_1261
D-glucosamine PTS permease activity	13	0.528841	1.37741	0.0991561	0.24789	6	ulaA,glvC,glcC,murP,scrA,SAUSA300_0240
SOS response	18	0.493058	1.34108	0.11168	0.267062	8	recG,sbcC,recN,cshA,sbcD,recA,ruvB,uvrA
antiporter activity	15	0.510866	1.34934	0.109617	0.267062	3	mnhB,mnhE,mnhA2
catalytic activity	17	0.496556	1.34223	0.115897	0.271249	7	saeR,SAUSA300_1858,mupG,bfmBAB,graX,SAUSA300_0753,SAUSA300_1183
metalloendopeptidase activity	11	0.523551	1.32375	0.12886	0.283493	4	SAUSA300_1278,sasF,ftsH,pepF
zinc ion binding	46	0.40641	1.23868	0.126873	0.283493	21	clpX,manA,ribD,priA,metE,ftsH,dnaG,gltX,murT,nfo,ribA,alaS,rpoC,dnaJ,metF,uvrA,pmi,rnz,mutM,fbaA,accD
kinase activity	43	0.406112	1.23096	0.127872	0.283493	23	nanK,relQ,ptsI,glvC,cap1C,glcC,mtlF,murP,scrA,rpoZ,murQ,SAUSA300_0311,fruC,prs,mvaD,SAUSA300_1565,nsaS,fakB2,nnrD,glpF,SAUSA300_1671,SAUSA300_0259,sbnI
identical protein binding	14	0.50072	1.31541	0.134235	0.289527	11	mscL,pyrG,pycA,argD,pfkA,hla,dgkB,murI,esaA,nagB,rocD
peptidoglycan-based cell wall biogenesis	11	0.517988	1.30968	0.14164	0.299623	7	tarL',femB,fmhA,fmhC,tagB,tagA,tarF
phosphorylation	86	0.372029	1.18531	0.146853	0.30479	53	fakA,thiM,nanK,udk,relQ,ptsI,glvC,hptR,cap1C,glcC,mtlF,murP,scrA,rpoZ,uppP,murQ,lysC,lacC,SAUSA300_0311,fruC,prs,mvaD,lacD,ribC,dhaK,dgkB,arcC,arcC1,mvaK1,bmrU,SAUSA300_1565,nsaS,ipk,fakB2,nnrD,thiD,glpF,SAUSA300_1671,dhaM,coaA,SAUSA300_0259,sbnI,SAUSA300_1695,pyrH,SAUSA300_1566,relP,dck,adk,thiN,gmk,tmk,dgk,tdk
nucleic acid binding	31	0.424999	1.25096	0.156469	0.318734	8	recG,recJ,SAUSA300_1875,recU,prmC,cshA,lysS,cspA
cell adhesion	11	0.49842	1.26021	0.167199	0.328427	3	fnbA,sdrC,sasA
manganese ion binding	13	0.487481	1.26969	0.164557	0.328427	6	menD,rnhB,cap1C,pepZ,ribA,SAUSA300_0534
ATPase activity	56	0.378689	1.16605	0.17982	0.347021	28	SAUSA300_2399,clpX,vga,SAUSA300_0704,SAUSA300_2094,SAUSA300_0309,thiW,opuCA,SAUSA300_2288,malK,opp-4D,SAUSA300_1369,opuBA,metN1,uvrA,SAUSA300_1217,pmtA,cntD,cbiO,SAUSA300_2168,fhuC,znuC,SAUSA300_0076,sufC,ecsA,tcyC,SAUSA300_2453,epiF
ATP-binding cassette (ABC) transporter complex	19	0.450226	1.23389	0.183861	0.348702	12	cntA,SAUSA300_0073,opuBB,opp-5A,SAUSA300_2103,SAUSA300_1808,phnD,opuCC,znuB,tagG,znuC,SAUSA300_1218
cell cycle	16	0.458554	1.2249	0.198969	0.364777	6	spoIIIE,murE,murF,murD,murA1,murA2
cell division	31	0.41128	1.21058	0.197593	0.364777	11	clpX,spoIIIE,murE,essC,murF,murD,murA1,murA2,ftsY,ftsW,rodA
lyase activity	44	0.380248	1.15438	0.210789	0.380112	23	accB,dat,capE,menD,SAUSA300_1304,SAUSA300_0677,sufS,argD,mutY,SAUSA300_1214,SAUSA300_2610,cysK,SAUSA300_1090,truB,mccA,SAUSA300_2512,hisF,pflA,nirR,SAUSA300_0701,bglR,SAUSA300_1173,SAUSA300_1699
cell wall	19	0.436078	1.19512	0.217569	0.383491	4	fnbA,sdrC,isdB,sasA
DNA replication	20	0.436185	1.20516	0.219636	0.383491	6	holA,dinG,SAUSA300_1875,sbcC,dnaJ,sbcD
carbohydrate derivative biosynthetic process	10	0.483987	1.19571	0.240343	0.41309	6	pgcA,tarL',tagB,gtaB,tagA,tarF
helicase activity	17	0.4295	1.16097	0.260513	0.440868	5	dinG,SAUSA300_2315,cshA,cspA,rho
extracellular region	84	0.342519	1.09026	0.270729	0.451215	44	sbi,fnbA,ptpA,gehB,sdrC,isdB,psmβ2,sasA,ssl1,eno,lytH,sspB,SAUSA300_1890,isdH,SAUSA300_1480,plc,esxA,atl,lukG,sspA,hlgB,hla,ssl4,ssl3,SAUSA300_1720,ssaA,SAUSA300_2256,SAUSA300_2503,sek,seq,sasD,splB,splD,ssl12,splA,ssl5,SAUSA300_1559,ssl8,ssl9,ssl2,ssl6,ssl7,isdC,ssl11
ligase activity	25	0.399296	1.13821	0.277946	0.456329	5	sbnF,ausA,sbnC,sbnE,acsA
nucleic acid phosphodiester bond hydrolysis	46	0.36076	1.09955	0.287712	0.465417	16	recD2,recJ,dinG,SAUSA300_1875,recU,sbcC,hsdM2,recN,hsdM1,rny/cvfA,nfo,SAUSA300_2401,sbcD,gcp,SAUSA300_0047,uvrA
negative regulation of transcription, DNA-templated	11	0.449918	1.13757	0.294995	0.470281	10	purR,manA,sigB,hrcA,codY,spxA,rex,lexA,fapR,rsbW
transaminase activity	28	0.37976	1.10246	0.306143	0.481082	12	iscS,aspB,sufS,SAUSA300_1199,kbl,gcvT,SAUSA300_1214,SAUSA300_2610,patA,SAUSA300_0137,bglR,gntR
carbohydrate metabolic process	28	0.375074	1.08886	0.327291	0.507071	12	bglA,manA,pgcA,murQ,pmi,hprK,nanA,citZ,nagB,tal,nanE,hxlA
fatty acid biosynthetic process	15	0.412384	1.08923	0.344364	0.526112	6	accB,accC,mvaS,fabD,fabH,accD
nucleoside metabolic process	10	0.441636	1.09108	0.359442	0.541625	4	purR,purF,tilS,prs
N-acetyltransferase activity	26	0.372199	1.06752	0.368315	0.547495	24	SAUSA300_0785,SAUSA300_1312,SAUSA300_2348,SAUSA300_2232,SAUSA300_0440,SAUSA300_0662,SAUSA300_0591,SAUSA300_2505,SAUSA300_0451,SAUSA300_2468,paiA,SAUSA300_0643,SAUSA300_2595,speG,SAUSA300_0943,SAUSA300_2615,SAUSA300_0441,rimI,SAUSA300_0771,SAUSA300_1980,SAUSA300_0665,SAUSA300_0343,ptpB,fosB
nucleotide binding	25	0.364579	1.03925	0.41289	0.603924	9	capE,SAUSA300_2315,fmhA,fmhC,aroB,ilvA1,graS,sirTM,nsaS
endonuclease activity	20	0.374304	1.03418	0.418016	0.603924	8	sbcC,hsdM2,hsdM1,rny/cvfA,SAUSA300_2401,sbcD,gcp,SAUSA300_0047
carbohydrate derivative binding	10	0.420355	1.03851	0.422747	0.603924	6	murQ,graS,nsaS,SAUSA300_2264,murR,SAUSA300_2271
transferase activity, transferring glycosyl groups	13	0.389451	1.01436	0.459916	0.648599	6	bshA,csbB,sgtA,hisZ,SAUSA300_0326,queE
'de novo' IMP biosynthetic process	12	0.38909	0.998428	0.470776	0.655511	4	purF,purB,purD,purK
cytoplasm	335	0.29346	0.998115	0.490509	0.674451	167	saeR,walR,yjbH,mgrA,era,thiE,fusA,sarR,rsfS,carB,thyA,SAUSA300_2020,ptpA,SAUSA300_2070,iscS,femX,ureG,udk,recU,dnaG,ptsI,ureC,hutU,groEL,hptR,hutH,rnhB,cshA,lysS,murE,pepZ,cspA,gltX,panB,parC,prfC,leuS,recX,trmE,dnaA,murF,glmU,murD,glnA,tilS,pycA,folC,argS,murA1,tyrS,femB,murA2,rsgA,ftsY,fmhA,fmhC,hflX,arcA,arcA,thiI,lysC,metK,pgk,argD,tuf,hmrA,alaS,pfkA,dnaJ,rnhC,rpoA,sigA,aroA2,prs,ddl,aroB,phe…
proton transmembrane transport	13	0.368826	0.960641	0.526371	0.714825	2	SAUSA300_2384,lctP1
RNA binding	46	0.312756	0.953239	0.549451	0.728187	22	glpP,SAUSA300_0517,rnhB,rny/cvfA,rho,hfq,tyrS,rnhC,SAUSA300_1554,SAUSA300_1161,fmt,SAUSA300_1090,truB,glcT,SAUSA300_1800,truA,SAUSA300_1336,nusA,splB,splD,rpsI,SAUSA300_1699
methylation	32	0.322705	0.950692	0.548096	0.728187	19	SAUSA300_1977,thyA,metE,rsmC,panB,radA,gcvT,metF,cntL,SAUSA300_1336,SAUSA300_0261,rsmE,SAUSA300_0464,hemD,SAUSA300_0072,SAUSA300_1707,SAUSA300_2485,SAUSA300_0036,SAUSA300_0056
hypoxanthine phosphoribosyltransferase activity	10	0.376425	0.929974	0.583691	0.750315	2	purR,purF
peptide transport	12	0.359489	0.922469	0.58661	0.750315	6	cntA,opp-4D,SAUSA300_0352,opp-2D,SAUSA300_0076,opp-2F
guanine phosphoribosyltransferase activity	10	0.376425	0.929974	0.583691	0.750315	2	purR,purF
dephosphorylation	25	0.314474	0.896423	0.623364	0.788161	15	rsbU,hptR,phoB,uppP,SAUSA300_0307,fbp,SAUSA300_0874,nagD,SAUSA300_1069,SAUSA300_0429,SAUSA300_0557,SAUSA300_2450,SAUSA300_0375,adsA,SAUSA300_1557
endopeptidase activity	10	0.357715	0.883751	0.639485	0.796277	7	ctpA,SAUSA300_2162,SAUSA300_2405,splD,splA,srtA,SAUSA300_0207
serine-type endopeptidase activity	13	0.318386	0.829266	0.71097	0.796277	8	epiP,radA,hrcA,sspA,splB,lexA,spsB,spsA
cytosol	107	0.281911	0.910331	0.683317	0.796277	26	rplC,folP,bglA,rplI,tgt,dinG,nusG,SAUSA300_1875,moeA,tkt,SAUSA300_0190,pyrG,SAUSA300_0517,leuA,lacG,dnaC,pdp,purB,hfq,ilvD,ribA,sucC,aroC,fabD,rpsQ,lacC
glycolytic process	11	0.323709	0.818466	0.713525	0.796277	4	eno,pgk,fdaB,fbaA
regulation of transcription, DNA-templated	117	0.277543	0.904478	0.71029	0.796277	53	saeR,accB,walR,mgrA,rsp,walK,sarR,glpP,hptR,tnp3,glnA,hfq,hutR,SAUSA300_0311,saeS,rbsR,SAUSA300_2575,malR,scrR,graS,pmi,fmt,SAUSA300_1455,SAUSA300_0333,nsaS,gltC,SAUSA300_2264,murR,SAUSA300_0878,ccpE,sarT,SAUSA300_2271,SAUSA300_2445,fruR,SAUSA300_0137,nusA,SAUSA300_0095,sarY,SAUSA300_2336,srrA,bglR,phoP,arcR,kdpE,SAUSA300_2261,SAUSA300_1560,SAUSA300_0063,gntR,mepR,nsaR,arlR,nreC,sarX
protein folding	10	0.336812	0.83211	0.697425	0.796277	3	clpX,dnaJ,prsA
methyltransferase activity	25	0.300166	0.855637	0.678751	0.796277	14	SAUSA300_1977,rsmC,panB,radA,cntL,SAUSA300_1336,SAUSA300_0261,rsmE,SAUSA300_0464,hemD,SAUSA300_0072,SAUSA300_1707,SAUSA300_0036,SAUSA300_0056
metallopeptidase activity	10	0.352715	0.871398	0.659871	0.796277	5	pepQ,SAUSA300_2162,SAUSA300_2405,ampS,SAUSA300_0207
transferase activity, transferring acyl groups	15	0.311416	0.82254	0.716649	0.796277	9	ausA,bmfBB,kbl,lipL,SAUSA300_1070,fapR,SAUSA300_0745,vraA,crtO
isomerase activity	23	0.303796	0.856746	0.677778	0.796277	22	SAUSA300_1690,dmpI,leuC,SAUSA300_0214,queA,SAUSA300_0789,menB,cntK,aroD,dsbA,SAUSA300_0375,leuD,SAUSA300_1909,rnmV,scpB,hxlB,SAUSA300_0783,SAUSA300_0794,folB,SAUSA300_2492,upp,rplU
ATPase-coupled transmembrane transporter activity	10	0.345792	0.854295	0.68133	0.796277	4	SAUSA300_1847,SAUSA300_0671,abcA,znuB
RNA phosphodiester bond hydrolysis, endonucleolytic	10	0.356694	0.881229	0.645923	0.796277	3	rnpA,rnhB,rnhC
ribosome	54	0.275286	0.846051	0.748252	0.815382	5	rpsJ,rplC,rplI,nusG,rpmH
cytosolic ribosome	11	0.312602	0.790384	0.748669	0.815382	10	rpmD,rplV,rplB,rplN,rpsB,rplA,rplJ,rpsE,rplO,rpsG
membrane	18	0.276586	0.752295	0.807377	0.862247	7	sasA,isdE,opuCA,opuBA,SAUSA300_1194,metQ1,lpl5
4 iron, 4 sulfur cluster binding	19	0.279051	0.764768	0.801839	0.862247	8	leuC,ilvD,mutY,bioB,pflA,queE,sdaAB,SAUSA300_0597
DNA-binding transcription factor activity	72	0.246099	0.77603	0.882118	0.933009	49	mgrA,rsp,sarR,hptR,hutR,hrcA,SAUSA300_2575,scrR,SAUSA300_1455,gltC,SAUSA300_2264,murR,SAUSA300_0878,ccpE,sarT,codY,SAUSA300_2271,fruR,SAUSA300_0137,nusA,SAUSA300_0095,bglR,arcR,SAUSA300_2261,SAUSA300_1560,gntR,mepR,rex,fapR,sigH,icaR,rsbW,SAUSA300_2485,rot,SAUSA300_2452,tcaR,SAUSA300_2563,argR,fur,argR,argR,perR,sarZ,SAUSA300_0332,SAUSA300_2216,mhqR,mraZ,SAUSA300_0954,zur
structural constituent of ribosome	58	0.239291	0.738275	0.912088	0.94858	6	rpsJ,rplC,rplI,nusG,rpmH,rpmD
rRNA binding	39	0.230916	0.692448	0.914086	0.94858	36	rplC,rplI,rsgA,rpsQ,rplV,rplB,rplR,rplN,rnc,rplA,rpsC,rpsD,rplE,rnmV,rpsE,rplF,rplO,rplP,rpsL,mrnC,rpsH,rpsK,rpsG,rpsM,rplT,rplD,rplX,rplU,rpsF,rpsS,rplW,rpsO,rpsN2,rpmE2,rpsT,rpsR
gluconeogenesis	12	0.227479	0.583724	0.947928	0.956624	6	pycA,pgk,fbp,sdaAB,SAUSA300_0375,pgi
translation	65	0.228449	0.71363	0.94006	0.956624	8	rpsJ,rplC,rplI,nusG,rpmH,rpmD,gatA,gatB
ribonucleoprotein complex	32	0.213693	0.629542	0.946894	0.956624	31	rplC,rplI,rpsQ,rplR,rplQ,rpsI,rpsC,saHPF,rplE,rplF,rplM,rplP,rplK,rpsH,rpsK,rpsM,rplT,rplS,rplX,rpsF,rplY,rpmA,rpsP,rplW,rpsO,rpsN2,rpsT,rpsR,rpmC,rpmI,rpsN
transferase activity	60	0.193112	0.598294	0.986014	0.986014	47	gtfB,asp1,gatA,gatB,accC,uppP,int,capI,cstA,queA,SAUSA300_1703,sirTM,miaA,rplB,SAUSA300_1025,fruR,cobB,SAUSA300_1695,capL,SAUSA300_0701,SAUSA300_0958,kdpE,SAUSA300_1560,tsaB,capH,srtA,capM,crr,SAUSA300_0239,sufU,bstA,SAUSA300_0332,tsaE,mtlA,purE,pdxT,SAUSA300_1495,SAUSA300_0858,SAUSA300_1212,lacF,gatC,SAUSA300_1210,SAUSA300_2460,purQ,ptsH,SAUSA300_0131,bioW

## Sheet: type C>C
Gene set enrichment analysis (type C>C variants)
GO term	size of the GO set	Enrichment score	Normalised enrichment score (NES)	unadjusted p value	FDR-adjusted p value	Number of mutated genes in the set	Mutated genes
helicase activity	17	0.623752	1.85788	0.00971169	0.142711	10	cspA,SAUSA300_0097,dinG,secA,cshA,secA2,SAUSA300_2315,recQ2,SAUSA300_2021,rho
ATP binding	297	0.320978	1.30781	0.00978953	0.142711	202	SAUSA300_2399,nanK,recG,clpX,leuS,argS,sigB,SAUSA300_2103,sbcC,pfkA,mcsB,metN1,spoIIIE,carB,dinG,SAUSA300_2094,uvrA,secA,recD2,cshA,priA,copA,secA2,SAUSA300_0809,ndk,purL,ybeY,fhs,SAUSA300_0671,folK,copA,SAUSA300_2556,parE,pknB,kdpB,gdpP,srrB,vga,SAUSA300_0704,walK,dnaG,aspS,pykA,sbnC,lytS,SAUSA300_1847,pycA,recN,dnaX,groEL,SAUSA300_2001,pyrG,SAUSA300_1285,pckA,uvrB,coaE,gntK,SAUSA300_1852,SAUSA3…
plasma membrane	325	0.325285	1.32816	0.00978953	0.142711	202	ebh,pbp2,sbi,pstS,gltT,SAUSA300_0866,uppP,metN1,spoIIIE,SAUSA300_1998,tarF,yajC,qoxD,SAUSA300_0241,epiB,comGC,ulaA,mdeA,gtfB,alsT,secA,mnhD2,gtfA,msa,copA,glcC,mnhA2,secA2,esaA,secDF,comEC,ybeY,SAUSA300_2384,mnhE,copA,SAUSA300_2556,gdpP,manP,srrB,spsA,SAUSA300_2448,vraE,lepA,walK,ribU,lytS,vraG,tarL',ezrA,tarL,nptA,ltaS,cudT,plsY,glvC,SAUSA300_0784,opuD2,cls2,SAUSA300_1064,SAUSA300_0676,SAUSA300_…
cell adhesion	11	0.692784	1.89727	0.00561391	0.142711	5	fnbA,fnbB,clfB,sdrC,SAUSA300_2351
peptidase activity	24	0.616113	1.94584	0.00162361	0.142711	4	SAUSA300_1856,SAUSA300_0932,clpX,SAUSA300_1534
menaquinone biosynthetic process	13	0.668358	1.90696	0.0104742	0.142711	8	ilvB,menC,budB,ilvD,cidC,menD,SAUSA300_0190,ubiE
transmembrane transport	147	0.371747	1.44677	0.00665537	0.142711	104	SAUSA300_2399,gltT,mdeA,SAUSA300_1231,alsT,mnhD2,mnhA2,opp-3A,SAUSA300_2556,vraE,ribU,kimA,SAUSA300_1847,vraG,SAUSA300_2395,cudT,cntA,opuD2,SAUSA300_0073,SAUSA300_0676,opuBB,lysP,SAUSA300_0566,SAUSA300_0201,opp-5A,SAUSA300_1808,SAUSA300_2538,modB,SAUSA300_2627,proP,SAUSA300_2389,norC,uhpT,SAUSA300_2265,SAUSA300_0305,aapA,mepA,tet38,mntH,sdrM,SAUSA300_0432,SAUSA300_1329,pyrP,pbuX,sbnD,SAUSA300_018…
RNA phosphodiester bond hydrolysis, endonucleolytic	10	0.700124	1.8669	0.00848382	0.142711	6	rnhB,rnhC,rnpA,ybeY,rnjB,rnjA
D-glucosamine PTS permease activity	13	0.658021	1.87747	0.0136082	0.16481	7	SAUSA300_0240,SAUSA300_0241,ulaA,glcC,glvC,murP,scrA
magnesium ion binding	56	0.425073	1.55016	0.0160711	0.172676	32	ilvB,rnhC,menC,purL,topB,budB,cidC,kdpB,farR,pgcA,pykA,menD,SAUSA300_0190,rpoC,SAUSA300_1571,thiE,lysS,purF,murE,glmM,glmU,eno,purA,papS,metK,ribA,deoB,sucC,thiM,pheS,fni,dinP
ribosome	54	0.430156	1.56381	0.0187746	0.172676	12	rpsJ,rpsQ,rplR,rplQ,rpsI,SAUSA300_0486,cshA,rplI,gdpP,rplF,SAUSA300_0343,nusG
protein-N(PI)-phosphohistidine-sugar phosphotransferase activity	21	0.564913	1.73714	0.0195276	0.172676	14	SAUSA300_2575,SAUSA300_0240,SAUSA300_0241,ulaA,glcC,mtlR,glvC,murP,scrA,SAUSA300_0238,SAUSA300_1809,SAUSA300_2507,SAUSA300_2471,SAUSA300_0310
cytosolic ribosome	11	-0.449337	-1.74721	0.0205944	0.172676
cell wall	19	0.552024	1.67472	0.0255123	0.18539	7	fnbA,fnbB,clfB,sdrC,hysA,spa,isdB
phosphoenolpyruvate-dependent sugar phosphotransferase system	32	0.489119	1.63967	0.0253036	0.18539	13	SAUSA300_2575,SAUSA300_0240,SAUSA300_0241,ulaA,dhaM,glcC,mtlR,manP,ptsI,glvC,murP,scrA,SAUSA300_0238
response to antibiotic	47	0.425697	1.51992	0.031	0.206095	18	pbp2,folP,uppP,fusA,arsC,parE,rplF,walK,rpoC,cls2,norC,uhpT,mepA,tet38,sdrM,arsB,murA1,femB
zinc ion binding	46	0.42599	1.51646	0.034034	0.206095	21	ribD,clpX,metF,manA,uvrA,priA,SAUSA300_2351,metE,ybeY,rnjB,dnaG,rnjA,rpoC,gltX,ftsH,cysS,murT,hutI,pepT,ribA,dnaJ
transmembrane transporter activity	65	0.395947	1.45805	0.032967	0.206095	42	mdeA,SAUSA300_1231,kimA,SAUSA300_2395,cudT,opuD2,SAUSA300_0676,opuBB,SAUSA300_0566,SAUSA300_1808,SAUSA300_2538,SAUSA300_2627,proP,SAUSA300_2389,norC,uhpT,SAUSA300_0305,tet38,sdrM,SAUSA300_1329,pyrP,pbuX,sbnD,SAUSA300_0180,SAUSA300_0091,SAUSA300_2217,ltaA,SAUSA300_2406,SAUSA300_2397,narK,SAUSA300_2451,SAUSA300_0881,SAUSA300_2349,fhuG,fhuB,htsC,pyrB,isdF,phnD,sstB,SAUSA300_0599,opuCC
nucleic acid binding	31	0.468804	1.55693	0.0367347	0.207459	16	recG,cspA,dnaE,SAUSA300_0486,cshA,recJ,gdpP,SAUSA300_1875,aspS,lysS,nuc,recQ2,SAUSA300_2021,asnC,prmC,rpsA
N-acetyltransferase activity	26	0.479154	1.54745	0.0380658	0.207459	9	SAUSA300_0785,SAUSA300_0440,SAUSA300_0591,SAUSA300_2505,SAUSA300_2595,SAUSA300_1312,SAUSA300_0771,SAUSA300_0665,SAUSA300_0343
ATPase activity	56	0.398802	1.45436	0.040959	0.212597	43	SAUSA300_2399,clpX,metN1,SAUSA300_2094,vraA,uvrA,SAUSA300_2542,vga,SAUSA300_0704,SAUSA300_1285,uvrB,SAUSA300_0936,fadE,SAUSA300_0309,hslU,thiW,rarA,cntF,opuCA,malK,opp-3D,SAUSA300_1369,opuBA,SAUSA300_1217,SAUSA300_2288,pmtA,opp-3F,cbiO1,cntD,cbiO,opp-4F,fhuC,opp-4D,SAUSA300_1302,znuC,SAUSA300_0076,salA,sufC,SAUSA300_2557,mntA,ssuB,ecsA,tcyC
DNA-directed DNA polymerase activity	11	0.577021	1.58024	0.0469274	0.217198	5	holA,dnaE,dinG,SAUSA300_1875,dnaX
GTPase activity	17	0.548152	1.6327	0.0483095	0.217198	11	ureG,fusA,prfC,typA,lepA,trmE,ffh,ftsY,hflX,tuf,ftsZ
peptidoglycan biosynthetic process	22	0.479613	1.49068	0.0557308	0.217198	11	pbp2,uppP,murE,murF,glmM,glmU,murD,murT,gatD,murA1,murA2
SOS response	18	0.498308	1.49751	0.055794	0.217198	11	recG,sbcC,uvrA,cshA,recN,uvrB,cshB,sbcD,recA,dinP,ruvB
carbohydrate transmembrane transport	26	0.46394	1.49832	0.0524691	0.217198	15	SAUSA300_2575,SAUSA300_0240,SAUSA300_0241,ulaA,glcC,mtlR,glvC,murP,scrA,SAUSA300_0238,SAUSA300_0659,SAUSA300_1809,SAUSA300_2507,SAUSA300_2471,SAUSA300_0310
negative regulation of transcription, DNA-templated	11	0.572131	1.56684	0.0502793	0.217198	3	sigB,manA,hrcA
nucleic acid phosphodiester bond hydrolysis	46	0.408937	1.45575	0.049049	0.217198	15	sbcC,dnaE,dinG,uvrA,recD2,rny/cvfA,ndk,recJ,SAUSA300_1875,hsdM2,recN,uvrB,hsdM1,nth,nuc
proteolysis	95	0.348374	1.32216	0.0709291	0.266595	31	SAUSA300_1856,pbp2,SAUSA300_1613,SAUSA300_0932,clpX,SAUSA300_1534,hrcA,ybeY,SAUSA300_0591,pbp3,sasF,spsA,pepF,SAUSA300_2531,ctpA,pepZ,SAUSA300_1509,ftsH,hslU,epiP,radA,SAUSA300_1172,SAUSA300_1569,est,ampS,pepT,rasP,hmrA,sspB,SAUSA300_1890,SAUSA300_0604
cell wall macromolecule biosynthetic process	12	0.536059	1.50756	0.0763274	0.277323	8	tarF,femX,tarL',tarL,femB,fmhA,fmhC,tagB
tRNA binding	24	0.438275	1.38418	0.105318	0.31955	10	rpsJ,rnpA,SAUSA300_1101,gltX,thiI,papS,rlmN,mnmA,pheS,SAUSA300_2070
cytoplasm	335	0.283945	1.16117	0.0939061	0.31955	166	thyA,iscS,mgrA,leuS,ureG,saeR,argS,rnhB,panB,pfkA,rnhC,fusA,cspA,dnaE,carB,femX,tig,pgi,rsfS,uvrA,secA,gtfA,cshA,secA2,prfC,ndk,purL,SAUSA300_2020,smpB,ptpA,rimP,ybeY,rnjB,ftnA,gdpP,gidA,hprT,dnaG,aspS,pycA,ptsI,ureC,xpt,rnjA,hutU,treC,groEL,pckA,uvrB,coaE,miaB,thiE,hutH,mntR,cysE,lysS,murE,pepZ,deoC1,gltX,purQ,cysS,nuc,thrD,argH,recQ2,trmE,dnaA,murF,walR,glmU,murD,cshB,glnA,sun,tilS,asnC,gsaB,se…
integral component of plasma membrane	25	0.434146	1.38461	0.108471	0.31955	20	tatC,nixA,divIB,mscL,kdpA,kdpB,lctP2,lctP1,arcD,arcD,nrgA,mntB,lgt,menA,rarD,pstA,znuB,phnE1,phnE2,kdpD
DNA recombination	22	0.445893	1.38587	0.0935857	0.31955	13	recG,sbcC,priA,recJ,tkt,recN,ccrB,recQ2,ccrA,int,sbcD,recA,ruvB
kinase activity	43	0.383174	1.34646	0.104313	0.31955	13	nanK,relQ,murQ,rpoZ,glcC,ybeY,folK,pykA,ptsI,glvC,pckA,murP,scrA
ligase activity	25	0.435385	1.38856	0.107438	0.31955	11	vraA,SAUSA300_2542,ausA,sbnF,sbnC,sbnE,acsA,SAUSA300_1673,sfnaD,fadE,hslU
DNA biosynthetic process	14	0.496384	1.43049	0.106987	0.31955	5	holA,dnaE,dinG,SAUSA300_1875,dnaX
regulation of cell shape	25	0.43251	1.37939	0.112603	0.322994	17	uppP,murE,murF,glmU,murD,murT,gatD,murA1,femB,murA2,fmhA,fmhC,rodA,ddl,mreC,SAUSA300_0749,mraY
phosphorelay signal transduction system	33	0.379779	1.27811	0.168857	0.323323	10	agrA,saeR,srrB,walK,lytS,airR,hptS,graR,hssS,walR
DNA binding	190	0.296725	1.18059	0.125874	0.323323	50	agrA,accB,mgrA,saeR,sigB,holA,hrcA,rpoZ,spoIIIE,SAUSA300_0373,comGC,dinG,uvrA,recD2,priA,topB,mtlR,SAUSA300_1247,greA,topA,parE,vga,SAUSA300_0704,ccpN,farR,hprT,dnaG,SAUSA300_2547,hsdM2,dnaX,ccrB,rpoC,uvrB,airR,SAUSA300_2322,hsdM1,SAUSA300_0034,mntR,nth,graR,dnaC,norG,SAUSA300_0677,tnp3,walR,ccrA,SAUSA300_0391,glnA,ftsK,SAUSA300_1170
RNA binding	46	0.353793	1.25945	0.176176	0.323323	35	glpP,rnhB,rnhC,SAUSA300_1161,rpsI,rny/cvfA,smpB,rnjB,rnjA,cshB,rho,sun,tyrS,SAUSA300_0517,SAUSA300_0981,SAUSA300_1336,SAUSA300_1085,rnr,pyrB,ksgA,fmt,SAUSA300_1090,truB,glcT,SAUSA300_0909,phoH,SAUSA300_1800,truA,SAUSA300_1036,rluB,splB,splF,splD,splE,SAUSA300_1699
structural constituent of ribosome	58	0.347661	1.27065	0.143856	0.323323	9	rpsJ,rpsQ,SAUSA300_1161,rplR,rplQ,rpsI,rplI,rplF,nusG
catalytic activity	17	0.442984	1.31945	0.159871	0.323323	14	saeR,cidC,SAUSA300_1858,SAUSA300_0859,mupG,SAUSA300_0329,SAUSA300_2387,bfmBAB,pdhB,SAUSA300_0538,graX,SAUSA300_0753,SAUSA300_1183,SAUSA300_1706
metalloendopeptidase activity	11	0.477309	1.30717	0.188827	0.323323	6	ybeY,sasF,pepF,ftsH,spdB,rasP
GTP binding	29	0.395976	1.3047	0.152508	0.323323	14	ureG,fusA,prfC,typA,lepA,trmE,ffh,purA,ftsY,hflX,tuf,ribA,ftsZ,SAUSA300_1556
cytosol	107	0.314392	1.2015	0.157842	0.323323	41	folP,fabD,rpsQ,moeA,dinG,rplR,bglA,rplQ,rpsI,rplI,ilvD,tkt,rplF,nusG,SAUSA300_1875,pykA,purN,dhaL,SAUSA300_2492,SAUSA300_0190,pyrG,leuA,glpK,rplY,pncB,lacG,dnaC,mtnN,glmM,pdp,purB,trpA,SAUSA300_0517,fabF,estA,ribA,rpsA,sucC,aroC,alr,tgt
gluconeogenesis	12	0.470578	1.32341	0.179204	0.323323	7	pgi,SAUSA300_0783,pycA,fbp,pckA,gpmA,pgk
'de novo' IMP biosynthetic process	12	0.465104	1.30801	0.186947	0.323323	7	purL,purN,purF,purQ,purB,purD,purK
DNA replication	20	0.429507	1.31707	0.152059	0.323323	6	sbcC,holA,dnaE,dinG,SAUSA300_1875,dnaX
glutamine metabolic process	12	0.471921	1.32718	0.175885	0.323323	6	carB,pabA,pyrG,purF,purQ,gatD
fatty acid biosynthetic process	15	0.452971	1.31451	0.171585	0.323323	2	accB,fabD
sodium ion transport	13	0.463859	1.32348	0.158765	0.323323	3	alsT,SAUSA300_2384,mnhE
transaminase activity	28	0.382965	1.25109	0.190134	0.323323	15	iscS,patA,SAUSA300_2539,norG,SAUSA300_1170,gsaB,hemL,aspB,sufS,SAUSA300_1199,kbl,bioF,gcvT,SAUSA300_1214,SAUSA300_2610
biosynthetic process	13	0.462706	1.32019	0.164278	0.323323	9	patA,norG,aspB,menF,kbl,pabB,bioF,SAUSA300_2610,metX
peptidoglycan-based cell wall biogenesis	11	0.505103	1.38328	0.138547	0.323323	7	tarF,tarL',tarL,femB,fmhA,fmhC,tagB
pathogenesis	86	0.317492	1.19052	0.192807	0.323323	9	ebh,sbi,mgrA,saeR,ssl3,esxA,clfB,spa,esaA
nickel cation transport	32	0.389301	1.30505	0.146761	0.323323	31	cntA,SAUSA300_0073,opuBB,SAUSA300_0201,SAUSA300_1808,modB,ssuC,SAUSA300_0202,opp-3C,opp-2C,opp-2B,opp-4B,opp-3B,cntB,opp-3B,pstC,pstA,opp-4C,cnzC,SAUSA300_0211,phnE1,cntD,potC,phnE2,potB,opp-3C,tcyB,metP1,opuCD,metP2,opuCB
phosphorylation	86	0.319752	1.19899	0.183816	0.323323	51	fakA,nanK,relQ,uppP,murQ,rpoZ,dhaM,glcC,ybeY,folK,ptsI,dhaL,glvC,pckA,coaE,gntK,glpK,murP,scrA,thrD,hptR,lysC,argB,cap1C,thiM,SAUSA300_0311,ppnK,pdxK,SAUSA300_2525,mvaD,lacD,ribC,dhaK,prs,dgkB,arcC,arcC1,arcC,mvaK1,bmrU,thrB,SAUSA300_1565,psuG,nsaS,lacC,ipk,fakB2,fruC,nnrD,thiD,glpF
peptidyl-histidine phosphorylation	16	0.452589	1.33597	0.153261	0.323323	9	agrC,srrB,walK,lytS,hptS,hssS,SAUSA300_1219,saeS,vraS
pyridoxal phosphate binding	33	0.398746	1.34194	0.116279	0.323323	18	dat,iscS,patA,SAUSA300_2539,norG,gsaB,hemL,aspB,sufS,rocD,kbl,argD,alr,mccB,bioF,metI,ilvA1,SAUSA300_2610
identical protein binding	14	0.462335	1.33236	0.161572	0.323323	8	pfkA,esaA,mscL,rnjB,pycA,pyrG,rocD,argD
ATP-binding cassette (ABC) transporter complex	19	0.423642	1.28524	0.173959	0.323323	17	SAUSA300_2103,opp-3A,cntA,SAUSA300_0073,opuBB,opp-5A,SAUSA300_1808,potA,mntB,phnD,opuCC,znuB,tagG,phnE2,znuC,SAUSA300_1218,tcyB
metal ion binding	164	0.29205	1.14589	0.18981	0.323323	70	stp1,iscS,panB,folP,pfkA,adsA,carB,moeA,secA,ndk,fepC,ilvD,topA,gehB,copA,parE,gdpP,isdB,tkt,SAUSA300_0709,nudF,walK,pepF,hprT,pycA,ptsI,ltaS,pyrG,pckA,miaB,nth,mgtE,trmE,epiP,leuC,radA,cydA,accC,mntH,mtaB,budA1,budA2,glnA,pdp,SAUSA300_1172,folC,SAUSA300_1171,purD,ampS,hflX,coaBC,SAUSA300_2086,rasP,hmrA,nagA,SAUSA300_1858,tgt,SAUSA300_2464,purK,ppnK,rlmN,sdhB,SAUSA300_1691,ddl,aroB,pepQ2,pepQ,mut…
cell wall organization	43	0.370993	1.30365	0.131394	0.323323	25	uppP,atl,SAUSA300_0958,pbp3,lytS,ltaS,murE,murF,glmU,murD,murT,gatD,murA1,femB,murA2,fmhA,fmhC,SAUSA300_0651,ddl,tagO,SAUSA300_1480,sle1,msrR,lytH,mraY
carbohydrate derivative biosynthetic process	10	0.490226	1.3072	0.178694	0.323323	4	tarF,pgcA,tarL',tarL
DNA repair	28	0.379982	1.24134	0.1963	0.324193	7	recG,sbcC,dinG,SAUSA300_0440,recJ,SAUSA300_1875,recN
dephosphorylation	25	0.389394	1.24188	0.209711	0.341171	8	rsbU,uppP,adsA,SAUSA300_0709,SAUSA300_0783,fbp,SAUSA300_0740,phoB
endonuclease activity	20	0.399525	1.22513	0.222809	0.35715	6	sbcC,rny/cvfA,ndk,hsdM2,hsdM1,nth
phosphorelay response regulator activity	10	0.468695	1.24979	0.232532	0.362085	5	saeR,srrB,walK,hssS,walR
protein folding	10	0.468263	1.24864	0.232532	0.362085	2	clpX,tig
manganese ion binding	13	0.42825	1.22188	0.246968	0.377231	11	rnhB,menD,pepZ,cap1C,ribA,deoB,SAUSA300_0534,hutG,ppaC,uppS,capC
cation transmembrane transport	15	0.419484	1.21733	0.24918	0.377231	7	copA,mnhE,copA,ktrA,ktrD,brnQ3,ktrB
extracellular region	84	0.305012	1.14278	0.261738	0.390815	60	sbi,atl,ssl3,esxA,fnbA,fnbB,clfB,sdrC,hysA,spa,ptpA,gehB,isdB,ltaS,ssl1,eno,ssl13,sspB,SAUSA300_1890,lukH,SAUSA300_1480,lukG,icaB,lytH,hlgB,hla,lukE,ssl4,hlgA,SAUSA300_1720,hlgC,ssaA,lukD,plc,SAUSA300_2256,isdH,SAUSA300_2503,sspA,sek,seq,sasD,ssl14,splB,splF,splD,splC,ssl12,splE,splA,ssl5,SAUSA300_1559,isdA,ssl8,ssl9,ssl2,ssl6,ssl7,ssl10,isdC,ssl11
cellular amino acid biosynthetic process	14	0.413951	1.19293	0.277293	0.408444	8	dat,purB,aroC,aroA2,aroB,arcB,argF,arcB
methylation	32	0.347604	1.16527	0.288462	0.419231	7	thyA,panB,metF,SAUSA300_1977,metE,ubiE,rsmC
regulatory region nucleic acid binding	16	0.396611	1.17073	0.295652	0.424027	2	mgrA,saeR
carbohydrate metabolic process	28	0.347825	1.13629	0.308325	0.43646	25	murQ,manA,bglA,hysA,pgcA,malA,glmM,pxpA,nagA,SAUSA300_2464,SAUSA300_2614,potA,icaB,pmi,hprK,nanA,nagB,galM,tal,icaC,murG,nanE,hxlA,upp,citZ
phosphorelay sensor kinase activity	14	0.392849	1.13212	0.335153	0.44225	8	srrB,walK,lytS,hptS,hssS,hptR,SAUSA300_1219,vraS
serine-type endopeptidase activity	13	0.398918	1.13819	0.330761	0.44225	5	hrcA,spsA,SAUSA300_1509,epiP,radA
glycolytic process	11	0.413864	1.13341	0.338547	0.44225	9	pgi,pykA,gpmA,eno,pgk,fdaB,fbaA,glk,tpiA
translation	65	0.299516	1.10295	0.33966	0.44225	12	rpsJ,rpsQ,rplR,rplQ,rpsI,rplI,rimP,rplF,nusG,rplY,gatA,gatB
protein phosphopantetheinylation	18	0.374327	1.12492	0.33691	0.44225	14	femX,bmfBB,femB,fmhA,fmhC,SAUSA300_0604,lipM,lgt,moeB,mprF,birA,lplA1,tcaD,lplA2
cell division	31	0.333399	1.10724	0.340816	0.44225	12	clpX,spoIIIE,tig,murE,murF,murD,ftsK,murA1,murA2,ftsY,ftsW,rodA
proton transmembrane transport	13	0.401847	1.14655	0.320838	0.44225	5	SAUSA300_2384,manP,lctP2,lctP1,SAUSA300_0659
hydrolase activity	134	0.275475	1.06909	0.351648	0.445694	97	xpaC,ribD,sigB,SAUSA300_2103,acuC,SAUSA300_0847,sdrC,SAUSA300_0440,gtfA,copA,SAUSA300_0809,comEC,SAUSA300_2020,SAUSA300_1247,kdpA,rppH,kdpB,gdpP,SAUSA300_2131,SAUSA300_2492,cls2,SAUSA300_2267,SAUSA300_1852,SAUSA300_0042,gatA,atpD,cstB,SAUSA300_1569,int,vraD,fmtA,hmrA,SAUSA300_0534,SAUSA300_0604,SAUSA300_2464,menH,SAUSA300_0321,SAUSA300_0641,SAUSA300_2517,SAUSA300_0044,SAUSA300_0702,ssuA,drp35,met…
4 iron, 4 sulfur cluster binding	19	0.368283	1.11729	0.348986	0.445694	17	ilvD,miaB,nth,leuC,mtaB,rlmN,mutY,bioB,sdaAA,lipA,SAUSA300_1706,pflA,moaA,nreB,queE,sdaAB,SAUSA300_0597
cell cycle	16	0.375378	1.10806	0.357609	0.448038	11	spoIIIE,tig,murE,murF,murD,murA1,murA2,mraY,xerC,xerD,whiA
peptide transport	12	0.390712	1.0988	0.365044	0.452157	10	cntA,cntF,opp-3D,opp-3F,SAUSA300_0352,opp-4F,opp-4D,opp-2D,SAUSA300_0076,opp-2F
ribonucleoprotein complex	32	0.320715	1.07513	0.393725	0.482202	6	rpsQ,rplR,rplQ,rpsI,rplI,rplF
antiporter activity	15	0.360546	1.0463	0.425137	0.509759	3	mnhD2,mnhA2,mnhE
transferase activity, transferring glycosyl groups	13	0.361489	1.0314	0.425579	0.509759	11	gtfA,SAUSA300_1637,bshA,icaB,csbB,pdxS,sgtA,hisZ,SAUSA300_0326,queE,tagX
carbohydrate derivative binding	10	0.373751	0.996618	0.459336	0.544213	8	murQ,nanR,nsaS,SAUSA300_2264,murR,kdpD,SAUSA300_2271,graS
endopeptidase activity	10	0.366576	0.977484	0.476518	0.558499	10	ctpA,SAUSA300_2162,SAUSA300_2405,splF,splD,splC,splE,splA,srtA,SAUSA300_0207
lyase activity	44	0.281952	0.994802	0.496489	0.575717	36	accB,dat,capE,SAUSA300_2512,menD,SAUSA300_0677,sufS,argD,mccB,SAUSA300_1304,SAUSA300_1898,mutY,SAUSA300_1214,SAUSA300_2610,cysK,SAUSA300_1090,truB,mccA,sbnA,trpD,capC,hisF,pflA,rluB,nirR,SAUSA300_0701,bglR,SAUSA300_1173,SAUSA300_1699,ilvE,hisI,SAUSA300_0700,cvfC,hisH,SAUSA300_0666,metC
nucleoside metabolic process	10	0.330736	0.881917	0.60252	0.691312	10	purF,gpmA,tilS,prs,purR,deoD1,comFC,upp,pyrE,pyrR
hypoxanthine phosphoribosyltransferase activity	10	0.324893	0.866336	0.624284	0.694357	10	hprT,xpt,purF,prs,purR,comFC,upp,pyrE,pyrR,apt
cation transmembrane transporter activity	14	0.303221	0.87383	0.616812	0.694357	8	mnhE,ktrA,ktrD,brnQ3,ktrB,czrB,SAUSA300_0171,SAUSA300_2363
guanine phosphoribosyltransferase activity	10	0.324893	0.866336	0.624284	0.694357	10	hprT,xpt,purF,prs,purR,comFC,upp,pyrE,pyrR,apt
ATPase-coupled transmembrane transporter activity	10	0.317983	0.847909	0.640321	0.705	5	SAUSA300_0671,SAUSA300_1847,mntB,metN2,znuB
metallopeptidase activity	10	0.307982	0.821243	0.670103	0.730412	9	ampS,pepT,pepQ,SAUSA300_2162,lytM,SAUSA300_2405,radC,prsS,SAUSA300_0207
nucleotide binding	25	0.256286	0.817366	0.711777	0.768155	12	capE,adsA,gtfA,hprT,SAUSA300_2315,fmhA,fmhC,aroB,ilvA1,sirTM,sucD,nsaS
transferase activity, transferring acyl groups	15	0.261657	0.759323	0.761749	0.814026	3	vraA,ausA,SAUSA300_0745
membrane	18	0.244974	0.736195	0.784335	0.825862	10	SAUSA300_2492,SAUSA300_1673,opuCA,metQ2,isdE,opuBA,SAUSA300_1194,metQ1,lpl5,ssuB
catalytic activity, acting on a protein	15	0.254219	0.737739	0.787978	0.825862	10	bmfBB,SAUSA300_1569,hmrA,SAUSA300_0604,menH,nsaS,SAUSA300_2518,SAUSA300_0601,lplA1,lplA2
methyltransferase activity	25	0.226842	0.723462	0.816116	0.847206	2	panB,SAUSA300_1977
isomerase activity	23	0.212202	0.665819	0.863257	0.887689	18	SAUSA300_1690,SAUSA300_0783,SAUSA300_2492,leuC,queA,menB,cntK,SAUSA300_0214,galM,aroD,upp,dsbA,SAUSA300_0375,leuD,SAUSA300_1909,hxlB,scpB,rnmV
transferase activity	60	0.190048	0.696665	0.88012	0.896571	15	uppP,capL,SAUSA300_0958,SAUSA300_1703,gtfB,ltaS,asp1,gatA,purQ,gatB,SAUSA300_0131,accC,gatD,lacR,int
regulation of transcription, DNA-templated	117	0.17463	0.672053	0.954046	0.96288	5	accB,mgrA,glpP,saeR,SAUSA300_2575
DNA-binding transcription factor activity	72	0.149105	0.553831	0.969031	0.969031	66	mgrA,SAUSA300_2575,hrcA,SAUSA300_0104,mntR,rsp,norG,SAUSA300_1170,lacR,hptR,nanR,ccpA,hutR,cidR,scrR,SAUSA300_1455,gltC,SAUSA300_2264,murR,SAUSA300_0878,ccpE,codY,SAUSA300_2271,fruR,SAUSA300_0137,sarS,SAUSA300_0095,sarU,treR,bglR,arcR,SAUSA300_2261,gntR,rex,fapR,sigH,icaR,nusA,SAUSA300_2485,rot,SAUSA300_1560,rsbW,SAUSA300_2452,tcaR,SAUSA300_2563,argR,fur,argR,argR,perR,sarZ,SAUSA300_0332,SAUSA300…

## Sheet: type C>I
Gene set enrichment analysis (type C>I variants)
GO term	size of the GO set	Enrichment score	Normalised enrichment score (NES)	unadjusted p value	FDR-adjusted p value	Number of mutated genes in the set	Mutated genes
response to antibiotic	47	0.61818	1.81358	0.0203783	0.179058	34	norC,fusA,pgsA,rplC,folP,lukE,vraS,mepA,norB,lmrS,cls2,rpoC,rpoB,ileS,gyrA,mprF,parC,pbp2,mecA,parE,gyrB,walK,aur,tcaA,uhpT,glpT,tet38,sdrM,femA,pbp4,arsB,lysA,murA1,femB
phosphorelay signal transduction system	33	0.676942	1.93694	0.0171956	0.179058	5	agrA,saeR,vraS,arlS,hssS
DNA binding	190	0.496935	1.55011	0.00179479	0.179058	48	agrA,SAUSA300_0267,SAUSA300_0577,mgrA,accB,SAUSA300_1247,farR,gbaA,SAUSA300_2547,SAUSA300_2322,saeR,sarS,purR,hutR,SAUSA300_1372,holA,ccpA,malR,hsdS1,polX,essC,polC,mtlR,ftsK,spoIIIE,rpoC,rpoB,polA,dinG,hsdR,gyrA,uvrA,SAUSA300_2431,recD2,priA,parC,pcrA,topB,topA,ligA,parE,uvrB,gyrB,vga,SAUSA300_0704,dnaG,recQ1,uvrC
DNA-directed DNA polymerase activity	11	0.70535	1.70914	0.0208721	0.179058	8	SAUSA300_1875,holA,dinP,polC,polA,dinG,dnaE,dnaX
GTPase activity	17	0.644827	1.68963	0.0157523	0.179058	15	fusA,ureG,era,ftsZ,typA,dynA,infB,lepA,prfC,trmE,ffh,obgE,ftsY,hflX,tuf
cell wall	19	0.643509	1.73127	0.0209823	0.179058	12	sasA,clfA,sdrD,fnbA,clfB,sdrC,isdH,fnbB,hysA,isdB,sdrE,spa
plasma membrane	325	0.426358	1.33508	0.0106863	0.179058	161	mnhB,norC,atpE,vraG,comEC,msa,ebh,mreD,pgsA,modB,SAUSA300_0010,metP1,opuCD,SAUSA300_0827,SAUSA300_0941,era,arcC,fhuG,metN2,vraS,opp-3C,comGB,norA,SAUSA300_2397,gltS,SAUSA300_0659,ulaA,brnQ1,mepA,arlS,gtfB,hssS,norB,SAUSA300_2389,lmrS,cls1,SAUSA300_0566,atpA,cls2,SAUSA300_0914,SAUSA300_0200,tarL,oatA,manP,essC,spoIIIE,htrA2,secA2,mnhA,secA,mprF,farE,copA,mnhA2,epiB,esaA,secDF,pbp2,SAUSA300_2384,gl…
sodium ion transport	13	0.715569	1.7987	0.0102979	0.179058	9	mnhB,gltS,SAUSA300_0914,mnhA,SAUSA300_2384,SAUSA300_0617,putP,nanT,alsT
cell adhesion	11	0.740371	1.794	0.014775	0.179058	9	sasA,clfA,sdrD,fnbA,clfB,sdrC,fnbB,sdrE,SAUSA300_2351
isomerase activity	23	0.626729	1.72651	0.0193746	0.179058	5	dmpI,SAUSA300_0789,hxlB,upp,SAUSA300_0214
cytosolic ribosome	11	-0.509353	-1.93124	0.00430742	0.179058
ATPase-coupled transmembrane transporter activity	10	0.702508	1.64651	0.0215532	0.179058	7	metN2,SAUSA300_0670,SAUSA300_0671,abcA,SAUSA300_2375,SAUSA300_1847,SAUSA300_2374
DNA biosynthetic process	14	0.665364	1.69892	0.0137113	0.179058	9	SAUSA300_1875,holA,dinP,polX,polC,polA,dinG,dnaE,dnaX
regulatory region nucleic acid binding	16	0.634285	1.64582	0.0299145	0.181713	4	mgrA,saeR,sarS,ccpA
GTP binding	29	0.554369	1.5662	0.0286299	0.181713	22	fusA,ureG,upp,era,ftsZ,engA,typA,relA,infB,feoB,lepA,prfC,trmE,ffh,obgE,purA,ftsY,hflX,tuf,ribA,SAUSA300_1556,ychF
pathogenesis	86	0.515309	1.56042	0.031968	0.181713	23	psmβ2,norC,sasA,mgrA,ebh,clfA,saeR,ssl14,sarS,tpiA,lukE,plc,lukH,arlS,hssS,norB,essC,clfB,isdH,mprF,clpC,esaA,clpL
antiporter activity	15	0.636076	1.64012	0.031016	0.181713	8	mnhB,mepA,mnhA,mnhA2,mnhD2,mnhD,mpsA,nhaC
peptidyl-histidine phosphorylation	16	0.632601	1.64145	0.0299145	0.181713	10	agrC,vraS,arlS,hssS,kdpD,walK,srrB,lytS,phoR,hptS
nucleic acid phosphodiester bond hydrolysis	46	0.560616	1.6408	0.0281407	0.181713	21	recU,SAUSA300_1875,SAUSA300_1793,polX,polC,mutS2,sbcC,polA,dinG,hsdR,uvrA,recD2,recJ,dnaE,mutL,uvrB,uvrC,hsdM2,recN,rny/cvfA,hsdM1
transmembrane transporter activity	65	0.505369	1.50906	0.038961	0.191263	56	norC,tcyB,fhuG,SAUSA300_2397,norB,SAUSA300_2389,lmrS,SAUSA300_0566,SAUSA300_2395,kimA,SAUSA300_2213,emrB,opuD1,cudT,sdcS,opuD2,SAUSA300_0676,nanT,opuBB,SAUSA300_1808,SAUSA300_1231,SAUSA300_2538,SAUSA300_2627,proP,uhpT,SAUSA300_0268,mdeA,tet38,sdrM,SAUSA300_1329,pyrP,SAUSA300_2449,pbuX,sbnD,SAUSA300_0180,SAUSA300_0091,SAUSA300_2217,ltaA,sfnaA,SAUSA300_2406,SAUSA300_2434,SAUSA300_1705,narK,SAUSA300…
pyridoxal phosphate binding	33	0.543446	1.55496	0.0384615	0.191263	28	ilvA2,SAUSA300_2284,bioF,mccB,hemL,gsaB,norG,SAUSA300_0503,SAUSA300_2539,bioA,aspB,lysA,sufS,glyA,rocD,kbl,argD,metC,patA,SAUSA300_2497,alr,iscS,metI,alr2,thrC,hisC,ilvA1,SAUSA300_2610
proton transmembrane transport	13	0.637273	1.60189	0.0374449	0.191263	8	SAUSA300_0659,lctP2,manP,SAUSA300_2384,SAUSA300_0617,fruA,cpaA,lctP1
DNA repair	28	0.542795	1.5322	0.0409417	0.192248	11	recU,SAUSA300_1875,dinP,recG,sbcC,polA,dinG,recJ,ligA,recQ1,recN
protein-N(PI)-phosphohistidine-sugar phosphotransferase activity	21	0.565826	1.5446	0.0456906	0.199664	18	ulaA,SAUSA300_0333,mtlR,SAUSA300_0238,glcB,glcA,SAUSA300_2575,glvC,glcC,ptaA,murP,scrA,treP,SAUSA300_0241,SAUSA300_1809,SAUSA300_2507,SAUSA300_2471,SAUSA300_0310
SOS response	18	0.585175	1.56069	0.0462185	0.199664	11	dinP,cshB,recG,mfd,sbcC,uvrA,uvrB,recQ1,uvrC,recN,cshA
transmembrane transport	147	0.455083	1.40611	0.04995	0.207048	86	norC,vraG,modB,metP1,opuCD,tcyB,phnE2,fhuG,opp-3C,norA,SAUSA300_2397,mepA,norB,SAUSA300_2389,lmrS,cls1,SAUSA300_0566,SAUSA300_0914,SAUSA300_0670,SAUSA300_2395,opp-4A,abcA,kimA,mnhA,SAUSA300_2213,mnhA2,SAUSA300_2556,emrB,vraE,SAUSA300_2375,SAUSA300_1847,SAUSA300_2374,opp-3A,opuD1,cudT,cntA,sdcS,opuD2,SAUSA300_0073,SAUSA300_0676,nanT,opuBB,mnhD2,mnhD,lysP,mpsA,SAUSA300_0201,opp-5A,alsT,SAUSA300_180…
D-glucosamine PTS permease activity	13	0.617625	1.5525	0.0517621	0.207048	10	ulaA,glcB,glcA,lacE,glvC,glcC,ptaA,murP,scrA,SAUSA300_0241
helicase activity	17	0.588658	1.54245	0.0539683	0.208163	11	mfd,secA2,secA,SAUSA300_0097,dinG,SAUSA300_2021,SAUSA300_0146,cshA,dnaB,recQ2,rho
magnesium ion binding	56	0.481002	1.42256	0.0600601	0.216216	33	recU,farR,upp,thiE,dinP,glmM,budB,pykA,purL,rpoC,pheT,topB,pnpA,kdpB,pgcA,ilvB,cidC,menD,SAUSA300_0190,lysS,purF,murE,bioA,glmU,eno,obgE,purA,papS,ackA,metK,ribA,deoB,sucC
phosphoenolpyruvate-dependent sugar phosphotransferase system	32	0.513104	1.46663	0.0597166	0.216216	18	ulaA,manP,SAUSA300_0333,mtlR,SAUSA300_0238,glcB,glcA,fruA,SAUSA300_2575,ptsI,lacE,glvC,mtlF,glcC,ptaA,murP,scrA,treP
DNA replication	20	0.549347	1.49041	0.06875	0.239516	9	SAUSA300_0463,SAUSA300_1875,holA,sbcC,dinG,dnaE,ligA,recQ1,dnaX
extracellular region	84	0.438494	1.32397	0.0789211	0.266359	22	psmβ2,sasA,ptpA,clfA,splF,ssl14,lukE,plc,lukH,gehA,sdrD,atl,fnbA,clfB,sdrC,isdH,fnbB,hysA,gehB,ltaS,isdB,SAUSA300_2579
ATP binding	297	0.387819	1.21553	0.0869131	0.268189	144	carA,splF,tcyB,SAUSA300_2557,SAUSA300_2288,arcC,SAUSA300_0702,metN2,vraS,SAUSA300_2070,opp-3D,SAUSA300_2168,cshB,arlS,hssS,thrD,atpA,SAUSA300_0200,SAUSA300_1285,SAUSA300_0670,SAUSA300_0671,abcA,pykA,essC,pknB,recG,ftsH,purL,ftsK,spoIIIE,mutS2,mfd,secA2,pycA,carB,secA,sbcC,alaS,dinG,hsdR,ileS,gyrA,valS,clpB,uvrA,SAUSA300_2431,mutS,recD2,clpC,leuS,priA,copA,pheT,parC,SAUSA300_0809,pcrA,clpL,copA,mu…
biosynthetic process	13	0.589704	1.48232	0.0837004	0.268189	13	bioF,trpE,norG,SAUSA300_0503,aspB,menF,kbl,patA,SAUSA300_2497,pabB,SAUSA300_1025,SAUSA300_2610,metX
carbohydrate transmembrane transport	26	0.508291	1.42473	0.0861538	0.268189	20	SAUSA300_0659,ulaA,SAUSA300_0333,mtlR,SAUSA300_0238,SAUSA300_2575,lacE,glvC,mtlF,glcC,ptaA,murP,scrA,treP,malE,SAUSA300_0241,SAUSA300_1809,SAUSA300_2507,SAUSA300_2471,SAUSA300_0310
N-acetyltransferase activity	26	0.498323	1.39679	0.102564	0.299376	2	SAUSA300_2348,SAUSA300_1312
ligase activity	25	0.503171	1.39982	0.101852	0.299376	16	pdxT,bioF,sfnaD,sbnF,sbnC,sbnE,acsA,bshC,SAUSA300_2542,fadE,hslU,vraA,femA,SAUSA300_0133,kbl,capJ
phosphorelay sensor kinase activity	14	0.559355	1.42824	0.113883	0.321429	8	vraS,arlS,hssS,walK,srrB,lytS,phoR,hptS
RNA binding	46	0.445383	1.30354	0.117588	0.321429	13	SAUSA300_1336,hfq,splF,SAUSA300_0517,SAUSA300_0981,sun,cshB,rnr,citB,pnpA,rnjB,rnjA,rny/cvfA
glutamine metabolic process	12	0.569391	1.41447	0.125	0.321429	6	carA,carB,glmS,pyrG,guaA,purF
cell wall macromolecule biosynthetic process	12	0.569767	1.41541	0.123884	0.321429	10	femX,tarL,tarL',SAUSA300_2314,femA,femB,fmhA,fmhC,tarF,tagB
cation transmembrane transport	15	0.550156	1.41858	0.122995	0.321429	8	mnhB,brnQ1,copA,copA,ktrD,brnQ3,ktrB,brnQ2
catalytic activity	17	0.521934	1.36761	0.140741	0.341035	4	SAUSA300_2284,saeR,pdhB,SAUSA300_0329
cytosol	107	0.396892	1.21213	0.144855	0.341035	19	hfq,cdd,rplI,SAUSA300_1875,pdxT,upp,rplC,SAUSA300_0517,folP,tgt,moeA,glmM,bglA,pncB,ilvD,pykA,dinG,citB,mutS
DNA recombination	22	0.500643	1.36874	0.135892	0.341035	11	recU,recG,sbcC,priA,recJ,tkt,recQ1,recN,ccrB,recQ2,ccrA
transaminase activity	28	0.469957	1.32659	0.148414	0.341035	21	bioF,hemL,gsaB,norG,SAUSA300_0503,SAUSA300_2539,SAUSA300_0458,SAUSA300_1651,aspB,argJ,sufS,SAUSA300_1199,glyA,kbl,SAUSA300_1669,patA,SAUSA300_2497,iscS,gcvT,SAUSA300_1214,SAUSA300_2610
nickel cation transport	32	0.45824	1.30981	0.147773	0.341035	6	modB,metP1,opuCD,tcyB,phnE2,opp-3C
nucleic acid binding	31	0.455528	1.29694	0.162107	0.346935	13	recU,SAUSA300_1875,recG,recJ,SAUSA300_2021,dnaE,gdpP,aspS,cshA,lysS,recQ2,xseA,asnC
cation transmembrane transporter activity	14	0.527962	1.34808	0.165944	0.346935	2	mnhB,brnQ1
regulation of cell shape	25	0.472123	1.31344	0.161523	0.346935	18	mreD,SAUSA300_0749,murE,murF,glmU,murD,murC,murT,femA,pbp4,murA1,femB,murA2,fmhA,fmhC,rodA,murG,ddl
negative regulation of transcription, DNA-templated	11	0.551824	1.33713	0.167043	0.346935	2	spxA,purR
cell wall organization	43	0.438304	1.27469	0.15493	0.346935	29	tarI',SAUSA300_0651,sle1,pbp1,atl,pbp3,ltaS,lytS,murE,tarM,murF,glmU,murD,murC,murT,femA,pbp4,murA1,femB,murA2,fmhA,fmhC,SAUSA300_0958,lytN,gdpS,murG,ddl,tagO,SAUSA300_1480
protein phosphopantetheinylation	18	0.497381	1.32654	0.173319	0.353179	15	SAUSA300_0604,femX,sucB,mprF,ggt,femA,pdhC,bmfBB,femB,fmhA,fmhC,lplA2,moeB,lplA1,birA
peptidoglycan-based cell wall biogenesis	11	0.54673	1.32478	0.17833	0.356659	9	tarL,tarL',SAUSA300_2314,femA,femB,fmhA,fmhC,tarF,tagB
metalloendopeptidase activity	11	0.530539	1.28555	0.209932	0.399706	7	SAUSA300_1278,ftsH,sasF,pepF,aur,lyrA,rasP
hypoxanthine phosphoribosyltransferase activity	10	0.548556	1.28568	0.210956	0.399706	2	upp,purR
guanine phosphoribosyltransferase activity	10	0.548556	1.28568	0.210956	0.399706	2	upp,purR
regulation of transcription, DNA-templated	117	0.371155	1.1354	0.225774	0.406394	23	hfq,rsp,mepR,mgrA,accB,saeR,sarS,hutR,SAUSA300_1372,ccpA,malR,sun,SAUSA300_0333,SAUSA300_2248,mtlR,mfd,SAUSA300_2431,SAUSA300_0104,clpL,SAUSA300_0238,rbf,SAUSA300_2575,walK
proteolysis	95	0.37682	1.1443	0.221778	0.406394	45	SAUSA300_1278,splF,est,SAUSA300_0604,SAUSA300_2518,SAUSA300_1613,SAUSA300_2168,SAUSA300_1976,pepT,ampS,arlS,ftsH,htrA2,clpB,clpC,pbp2,clpL,pbp3,mecA,ggt,sasF,pepF,SAUSA300_2531,aur,flp,ctpA,pepZ,SAUSA300_1509,SAUSA300_1697,hslU,epiP,radA,pbp4,SAUSA300_1172,htrA1,SAUSA300_1569,clpX,rasP,hmrA,sspB,SAUSA300_0105,SAUSA300_1890,lytN,prsS,SAUSA300_1460
ATP-binding cassette (ABC) transporter complex	19	0.473577	1.27409	0.222455	0.406394	9	tcyB,phnE2,opp-4A,opp-3A,cntA,SAUSA300_0073,opuBB,opp-5A,SAUSA300_1808
cytoplasm	335	0.348952	1.09372	0.233766	0.408327	133	recU,trpB,ureA,fusA,spxA,mgrA,SAUSA300_2020,ptpA,ureG,thiE,ung,saeR,sarS,tpiA,era,arcC,SAUSA300_0749,dinP,SAUSA300_2070,SAUSA300_2168,ftsZ,pepT,hutI,femX,hemL,gsaB,sun,gid,cshB,argH,thrD,pgm,treC,gidA,polC,purL,pflB,mfd,rnr,secA2,pycA,carB,secA,alaS,polA,ileS,gyrA,valS,clpB,uvrA,leuS,pheT,parC,pcrA,infB,pnpA,dnaE,uvrB,metS,gdpP,thrS,gyrB,glmS,dnaG,recQ1,uvrC,aspS,rnjB,ptsI,ureC,proS,rnjA,argS,hut…
zinc ion binding	46	0.404421	1.18365	0.238191	0.408327	22	cdd,pepT,hutI,ftsH,rpoC,alaS,ileS,uvrA,priA,metE,metF,dnaG,rnjB,rnjA,SAUSA300_2351,gltX,SAUSA300_1697,cysS,murT,pyrC,clpX,glyA
menaquinone biosynthetic process	13	0.496941	1.24914	0.237885	0.408327	7	budB,ilvD,ilvB,cidC,menD,SAUSA300_0190,menE
nucleoside metabolic process	10	0.525047	1.23058	0.244755	0.413024	2	upp,purR
phosphorelay response regulator activity	10	0.519954	1.21865	0.254079	0.422162	4	saeR,hssS,walK,srrB
glycolytic process	11	0.500844	1.2136	0.266366	0.435871	7	tpiA,pgm,pykA,pgi,eno,pdhC,pgk
catalytic activity, acting on a protein	15	0.465	1.199	0.279144	0.449964	11	SAUSA300_0604,SAUSA300_2518,sucB,flp,pdhC,bmfBB,SAUSA300_1569,hmrA,lytN,lplA2,lplA1
tRNA binding	24	0.4151	1.14913	0.324408	0.476528	14	SAUSA300_2070,alaS,ileS,pheT,metS,thrS,SAUSA300_1101,gltX,thiI,papS,SAUSA300_1025,rlmN,mnmA,pheS
integral component of plasma membrane	25	0.410579	1.14223	0.322016	0.476528	11	tatC,phnE2,lctP2,kdpA,kdpD,kdpB,lctP1,arcD,arcD,divIB,nrgA
carbohydrate metabolic process	28	0.403074	1.13779	0.32651	0.476528	22	upp,SAUSA300_2614,glmM,bglA,malA,hysA,pgcA,glmS,ptaA,SAUSA300_0503,nagA,citZ,potA,murG,icaC,galM,manA,pmi,hprK,murQ,nanA,icaB
cellular amino acid biosynthetic process	14	0.455802	1.16383	0.315618	0.476528	10	ilvA2,fumC,aroA,purB,aroC,aroA2,aroB,arcB,argF,arcB
peptidoglycan biosynthetic process	22	0.422264	1.15445	0.323651	0.476528	20	glmM,pbp2,murE,murF,glmU,murD,murC,murT,pbp4,murA1,murA2,alr,alr2,murG,ddl,mraY,sgtA,uppP,sgtB,murI
membrane	18	0.432294	1.15295	0.313025	0.476528	4	sasA,isdE,pbp1,mecA
metal ion binding	164	0.344098	1.06595	0.320679	0.476528	80	stp1,SAUSA300_1278,SAUSA300_1081,budA1,sbnG,SAUSA300_1181,folP,isdE,htsA,tgt,SAUSA300_1976,ampS,moeA,ilvD,gehA,pycA,carB,secA,citB,isdH,adsA,topA,gehB,copA,ligA,parE,gdpP,ltaS,isdB,thrS,gyrB,tkt,walK,pepF,ptsI,fepC,pyrG,pckA,miaB,SAUSA300_0147,aur,SAUSA300_0925,mgtE,tcaA,trmE,epiP,leuC,radA,cydA,SAUSA300_1563,accC,mntH,mtaB,glnA,pdp,SAUSA300_1172,folC,SAUSA300_1171,purD,hflX,coaBC,SAUSA300_2086,r…
methyltransferase activity	25	0.403512	1.12257	0.347737	0.489772	3	SAUSA300_1336,SAUSA300_1977,SAUSA300_0981
peptide transport	12	0.440893	1.09526	0.358259	0.489772	3	opp-3D,SAUSA300_0200,opp-4A
ATPase activity	56	0.366145	1.08287	0.351351	0.489772	22	SAUSA300_2557,SAUSA300_2288,opp-3D,SAUSA300_2168,SAUSA300_0200,SAUSA300_1285,mutS2,clpB,uvrA,clpC,clpL,mutL,uvrB,vga,SAUSA300_0704,SAUSA300_2617,SAUSA300_2542,fadE,hslU,thiW,vraA,SAUSA300_2094
cell division	31	0.387544	1.10338	0.357649	0.489772	17	essC,ftsK,spoIIIE,SAUSA300_2213,murE,SAUSA300_1482,murF,murD,murC,tig,murA1,clpX,murA2,ftsY,ftsW,SAUSA300_1560,rodA
carbohydrate derivative biosynthetic process	10	0.474865	1.11297	0.342657	0.489772	5	tarL,pgcA,glmS,tarL',SAUSA300_2314
nucleotide binding	25	0.378885	1.05406	0.436214	0.547804	19	dynA,kdpD,adsA,SAUSA300_0147,SAUSA300_0925,gtfA,SAUSA300_0828,femA,fmhA,fmhC,mnaA,airS,aroB,graS,ilvA1,capE,sirTM,sucD,nsaS
gluconeogenesis	12	0.421672	1.04751	0.41183	0.547804	6	tpiA,pycA,fbp,pckA,pgi,pgk
cell cycle	16	0.409297	1.06203	0.410256	0.547804	13	spoIIIE,murE,murF,murD,murC,tig,murA1,murA2,murG,mraY,whiA,xerC,xerD
dephosphorylation	25	0.38281	1.06497	0.427984	0.547804	9	SAUSA300_0540,SAUSA300_0600,rsbU,adsA,fbp,SAUSA300_0147,SAUSA300_0925,phoB,SAUSA300_0828
transferase activity, transferring glycosyl groups	13	0.418504	1.05198	0.4163	0.547804	12	SAUSA300_1637,glmS,gtfA,bshA,crtQ,tagX,csbB,sgtA,pdxS,icaB,hisZ,SAUSA300_0326
manganese ion binding	13	0.410328	1.03143	0.433921	0.547804	7	capC,pgm,menD,pepZ,ribA,deoB,SAUSA300_0534
carbohydrate derivative binding	10	0.444877	1.04268	0.426573	0.547804	10	hxlB,kdpD,glmS,graS,murQ,nsaS,SAUSA300_2264,murR,nanR,SAUSA300_2271
ribonucleoprotein complex	32	0.356049	1.01771	0.470648	0.584252	2	rplI,rplC
metallopeptidase activity	10	0.415272	0.973298	0.495338	0.607915	2	pepT,ampS
protein folding	10	0.398092	0.933032	0.530303	0.636364	5	grpE,dnaK,tig,clpX,dnaJ
methylation	32	0.339541	0.970528	0.525304	0.636364	6	SAUSA300_1336,SAUSA300_1977,SAUSA300_0981,metE,rbf,metF
identical protein binding	14	0.359361	0.91758	0.55423	0.657767	10	pycA,esaA,rnjB,pyrG,essB,rocD,argD,hla,dgkB,pfkA
hydrolase activity	134	0.311545	0.957573	0.562438	0.660253	23	atpE,comEC,SAUSA300_2020,SAUSA300_1247,SAUSA300_2267,SAUSA300_0540,SAUSA300_0604,SAUSA300_2518,SAUSA300_2102,SAUSA300_0702,engA,cls1,atpA,cls2,kdpA,sdrC,SAUSA300_2431,copA,SAUSA300_0809,relA,kdpB,gdpP,thrS
lyase activity	44	0.32056	0.934175	0.573441	0.665931	6	accB,capC,SAUSA300_1304,SAUSA300_1898,mccB,pflB
DNA-binding transcription factor activity	72	0.312043	0.937523	0.581419	0.666182	11	rsp,mepR,mgrA,sarS,hutR,ccpA,SAUSA300_2248,SAUSA300_2431,SAUSA300_0104,rbf,SAUSA300_2575
peptidase activity	24	0.325569	0.901276	0.585994	0.666182	5	SAUSA300_2168,SAUSA300_1976,clpB,clpC,clpL
'de novo' IMP biosynthetic process	12	0.356312	0.885145	0.601562	0.676758	7	purL,purF,purH,purB,purD,purK,purM
endonuclease activity	20	0.320684	0.870036	0.630208	0.694515	6	mutS2,sbcC,mutL,hsdM2,rny/cvfA,hsdM1
4 iron, 4 sulfur cluster binding	19	0.319515	0.859611	0.627492	0.694515	18	ilvD,citB,miaB,leuC,mtaB,rlmN,mutY,nreB,moaA,bioB,SAUSA300_1706,lipA,sdaAA,pflA,queE,sdaAB,nth,SAUSA300_0597
kinase activity	43	0.303799	0.883515	0.65996	0.717305	15	upp,pykA,relA,glcB,glcA,ptsI,lacE,glvC,pckA,mtlF,glcC,ptaA,murP,scrA,treP
transferase activity, transferring acyl groups	15	0.323448	0.834012	0.664171	0.717305	7	SAUSA300_2518,vraA,pdhC,bmfBB,dltB,kbl,SAUSA300_1905
endopeptidase activity	10	0.344478	0.807374	0.693473	0.741536	1	splF
rRNA binding	39	0.293001	0.842807	0.703927	0.745335	2	rplI,rplC
fatty acid biosynthetic process	15	0.306139	0.78938	0.712299	0.746877	1	accB
serine-type endopeptidase activity	13	0.257027	0.646081	0.848018	0.872247	8	htrA2,SAUSA300_1509,epiP,radA,htrA1,sspA,hrcA,pyrB
transferase activity	60	0.253503	0.755662	0.848	0.872247	21	pdxT,SAUSA300_2215,SAUSA300_0749,SAUSA300_0702,gtfB,ltaS,uvrC,tarS,asp1,guaA,tarM,gatA,gatB,accC,int,SAUSA300_1560,SAUSA300_0958,capL,metC,SAUSA300_1025,capI
ribosome	54	0.245156	0.722376	0.860861	0.877104	3	rplI,rplC,cshB
phosphorylation	86	0.243483	0.737296	0.875125	0.883304	72	upp,arcC,thrD,relA,glcB,glcA,ptsI,lacE,fakA,glvC,pckA,gntK,mtlF,glcC,glpK,ptaA,murP,scrA,treP,lysC,ackA,SAUSA300_1671,SAUSA300_0311,mvaK2,mvaD,lacD,ribC,dhaK,prs,fruC,dgkB,arcC,arcC1,lacC,psuG,mvaK1,bmrU,thrB,SAUSA300_1565,murQ,nsaS,uppP,SAUSA300_2525,nanK,ipk,fakB2,nnrD,pdxK,thiD,glpF,ppnK,coaA,SAUSA300_0259,thiM,cap1C,sbnI,argB,hptR,SAUSA300_1695,pyrH,SAUSA300_1566,relP,dck,cmk,adk,thiN,relQ,gm…
RNA phosphodiester bond hydrolysis, endonucleolytic	10	-0.168679	-0.609674	0.9375	0.9375

## Sheet: type I>I
Gene set enrichment analysis (type I>I)
GO term	size of the GO set	Enrichment score	Normalised enrichment score (NES)	unadjusted p value	FDR-adjusted p value	Number of mutated genes in the set	Mutated genes
DNA binding	190	0.513036	1.67504	7.84006e-05	0.00862407	54	agrA,rpoB,walR,purR,sarR,greA,saeR,pmtC,rpoA,SAUSA300_1204,SAUSA300_0453,sarX,SAUSA300_1309,mcsA,parC,SAUSA300_2322,vraR,hssR,comEA,treR,sarU,nfo,xerC,essC,SAUSA300_1658,holA,malR,rpoC,hsdS2,rarA,norG,SAUSA300_2431,uvrA,hsdR,gyrA,polA,SAUSA300_0034,recD2,priA,ccrB,dnaX,pcrA,topB,mtlR,uvrC,ligA,parE,uvrB,vga,SAUSA300_0704,dnaG,recQ1,gyrB,hsdM2
phosphorelay signal transduction system	33	0.712738	2.08654	0.000378975	0.0208436	10	agrA,walR,walK,saeR,vraS,vraR,hssR,hptR,graS,gdpS
response to antibiotic	47	0.641464	1.93137	0.000785436	0.0260708	19	mprF,rpoB,sgtB,walK,rplC,vraS,parC,graS,rpoC,rlmN,arsB,pbp4,lmrS,ileS,gyrA,cls2,pbp2,fusA,parE
plasma membrane	325	0.433561	1.4397	0.000948031	0.0260708	168	mprF,ebh,sgtB,era,atpH,walK,pmtD,vraS,SAUSA300_0180,secE,mtlF,mnhC2,vraG,SAUSA300_2556,comEC,mnhE,SAUSA300_0784,SAUSA300_2315,opuCB,SAUSA300_0568,SAUSA300_2466,lpl8,cbiO1,yidC,pstC,essC,sstB,opp-4D,opp-2B,SAUSA300_1533,fhuB,graS,SAUSA300_2471,htrB,SAUSA300_0640,gdpS,comGB,SAUSA300_0202,SAUSA300_2397,sfnaA,tcaB,SAUSA300_2379,lyrA,essB,esaA,brnQ1,SAUSA300_0268,nhaC,atpD,lmrS,SAUSA300_0201,glcC,secA…
ATP binding	297	0.423544	1.40373	0.00279337	0.0532466	138	walK,udk,thiM,pmtC,prs,vraS,SAUSA300_2070,panD,SAUSA300_2556,rsbW,parC,clpC,kdpC,mutS,alaS,cmk,SAUSA300_0309,bioW,splE,ssuB,mntA,vraD,SAUSA300_1302,cbiO1,SAUSA300_2288,thrB,lacC,essC,sstB,pycA,opp-4D,mnmA,potA,SAUSA300_1025,SAUSA300_1560,clpX,rarA,serS,carB,asnC,SAUSA300_2094,recQ2,cysS,SAUSA300_2431,hslU,uvrA,atpD,hsdR,ileS,gyrA,valS,glpK,clpB,cshA,secA,gntK,recD2,leuS,priA,pckA,pheT,secA2,SAUSA…
pathogenesis	86	0.532941	1.66022	0.00290436	0.0532466	20	mprF,ebh,sarR,saeR,sarX,clpC,isdH,clfB,ssl1,ssl10,splE,splC,sarU,essC,sspA,graS,sasA,essB,esaA,clfA
phosphorelay response regulator activity	10	0.792669	1.89102	0.00604108	0.0949313	3	walR,walK,saeR
N-acetyltransferase activity	26	-0.289057	-1.68693	0.00841523	0.115709
regulatory region nucleic acid binding	16	0.727496	1.90186	0.0101714	0.124317	4	walR,sarR,saeR,sarU
transmembrane transport	147	0.434456	1.40009	0.0169723	0.186695	90	pmtD,SAUSA300_0180,mnhC2,vraG,SAUSA300_2556,opuCB,SAUSA300_2213,cbiO1,SAUSA300_0272,pstC,eta,sstB,opp-2B,fhuB,SAUSA300_0640,SAUSA300_0202,SAUSA300_2397,sfnaA,aapA,SAUSA300_0268,nhaC,lmrS,SAUSA300_0201,SAUSA300_0914,mnhA,mnhA2,abcA,SAUSA300_2374,SAUSA300_2375,emrB,vraE,kimA,SAUSA300_1847,opp-4A,opp-3A,opuD1,SAUSA300_2395,SAUSA300_0670,cudT,cntA,sdcS,opuD2,SAUSA300_0073,SAUSA300_0676,nanT,opuBB,mnh…
tRNA binding	24	0.591162	1.65287	0.0371134	0.221477	12	SAUSA300_2070,rnpA,dtd,alaS,mnmA,rlmN,SAUSA300_1025,ileS,pheT,metS,thrS,SAUSA300_1101
structural constituent of ribosome	58	0.498779	1.52067	0.033	0.221477	7	rplC,rpmH,rpmD,rplV,rplN,nusG,rplD
hypoxanthine phosphoribosyltransferase activity	10	0.730333	1.74231	0.0340522	0.221477	2	purR,prs
cytoplasm	335	0.382861	1.27227	0.0238812	0.221477	148	walR,yjbH,era,sarR,udk,saeR,rpoA,prs,SAUSA300_2070,rocD,SAUSA300_0453,gidA,rbfA,rsfS,panD,uspA2,sarX,dtd,parC,scpB,clpP,alaS,thiE,cmk,sarU,hptR,recX,rsgA,hchA,xerC,thrB,pycA,eutD,moeB,prfA,mnmA,rlmN,citZ,SAUSA300_1025,nusA,deoB,dnaE,purA,serS,carB,asnC,recQ2,cysS,uvrA,ileS,gyrA,valS,polA,clpB,cshA,secA,miaB,prfC,leuS,pckA,pheT,secA2,rnr,treC,pflB,pcrA,purL,rnjA,pnpA,fusA,aspS,uvrC,uvrB,metS,thrS,…
cell adhesion	11	0.697327	1.6902	0.0380313	0.221477	7	clfB,sdrC,sasA,sdrD,fnbA,fnbB,clfA
nucleoside metabolic process	10	0.710241	1.69438	0.0397276	0.221477	2	purR,prs
peptidyl-histidine phosphorylation	16	0.677721	1.77174	0.0267666	0.221477	5	agrC,walK,vraS,graS,gdpS
protein phosphopantetheinylation	18	0.650328	1.73697	0.0360169	0.221477	5	mprF,ggt,SAUSA300_0604,moeB,sucB
cytosolic ribosome	11	0.693362	1.68059	0.0402685	0.221477	3	rpmD,rplV,rplN
guanine phosphoribosyltransferase activity	10	0.730333	1.74231	0.0340522	0.221477	2	purR,prs
GTPase activity	17	0.621012	1.635	0.0512821	0.240013	15	era,rsgA,dynA,prfC,fusA,typA,lepA,infB,trmE,ffh,obgE,ftsY,hflX,tuf,ftsZ
transmembrane transporter activity	65	0.469167	1.43362	0.052	0.240013	55	SAUSA300_0180,SAUSA300_2213,sstB,fhuB,SAUSA300_2397,sfnaA,SAUSA300_0268,lmrS,emrB,kimA,opuD1,SAUSA300_2395,cudT,sdcS,opuD2,SAUSA300_0676,nanT,opuBB,SAUSA300_0566,SAUSA300_1808,SAUSA300_1231,SAUSA300_2538,SAUSA300_2627,proP,SAUSA300_2389,norB,norC,uhpT,mdeA,tet38,sdrM,SAUSA300_1329,pyrP,SAUSA300_2449,pbuX,sbnD,SAUSA300_0091,SAUSA300_2217,ltaA,SAUSA300_2406,SAUSA300_2434,SAUSA300_1705,narK,SAUSA300…
pyridoxal phosphate binding	33	0.531607	1.55628	0.0523666	0.240013	29	rocD,bioW,dat,alr,norG,SAUSA300_0503,SAUSA300_2539,bioA,gsaB,hemL,aspB,ilvA2,lysA,sufS,glyA,kbl,argD,metC,patA,SAUSA300_2497,mccB,iscS,bioF,metI,alr2,thrC,hisC,ilvA1,SAUSA300_2610
negative regulation of transcription, DNA-templated	11	0.670327	1.62476	0.0469799	0.240013	3	purR,rsbW,manA
phosphorelay sensor kinase activity	14	0.611734	1.56409	0.0740741	0.291005	10	walK,vraS,hptR,gdpS,srrB,lytS,phoR,hptS,hssS,arlS
translation	65	0.453455	1.38561	0.07	0.291005	7	rplC,rpmH,rpmD,rplV,rplN,nusG,rplD
proteolysis	95	0.421981	1.32236	0.0699301	0.291005	56	sgtB,atpH,SAUSA300_2335,ggt,clpC,clpP,radC,SAUSA300_1534,splE,splC,SAUSA300_0604,SAUSA300_0601,sspA,ampS,clpX,pbp4,hslU,SAUSA300_1509,clpB,htrA2,SAUSA300_2531,pbp2,clpL,pbp3,SAUSA300_1278,sasF,pepF,mecA,aur,ftsH,flp,ctpA,pepZ,SAUSA300_1697,epiP,radA,arlS,SAUSA300_1172,htrA1,SAUSA300_1569,pepT,SAUSA300_1976,rasP,hmrA,sspB,SAUSA300_0105,SAUSA300_1890,lytN,prsS,SAUSA300_2168,SAUSA300_1460,SAUSA300_1…
protein-N(PI)-phosphohistidine-sugar phosphotransferase activity	21	0.547395	1.51138	0.0737279	0.291005	18	SAUSA300_2471,glcC,mtlR,SAUSA300_0238,glcB,SAUSA300_2575,SAUSA300_0333,glvC,glcA,ptaA,murP,scrA,treP,ulaA,SAUSA300_0241,SAUSA300_1809,SAUSA300_2507,SAUSA300_0310
cell wall	19	0.54865	1.47731	0.0879237	0.293333	9	isdH,clfB,sdrC,sasA,sdrD,fnbA,fnbB,clfA,isdB
phosphoenolpyruvate-dependent sugar phosphotransferase system	32	0.496092	1.44606	0.0847629	0.293333	19	mtlF,SAUSA300_2471,glcC,mtlR,SAUSA300_0238,glcB,fruA,SAUSA300_2575,manP,SAUSA300_0333,ptsI,lacE,glvC,glcA,ptaA,murP,scrA,treP,ulaA
antiporter activity	15	0.588794	1.5243	0.0849462	0.293333	9	mnhC2,mnhE,nhaC,mnhA,mnhA2,mnhD2,mnhD,mpsA,mepA
ATPase activity	56	0.448559	1.36579	0.088	0.293333	25	clpC,SAUSA300_0309,ssuB,mntA,SAUSA300_1302,cbiO1,SAUSA300_2288,opp-4D,clpX,rarA,SAUSA300_2094,hslU,uvrA,clpB,fadE,mutS2,SAUSA300_2617,clpL,mutL,uvrB,vga,SAUSA300_0704,SAUSA300_1285,SAUSA300_2542,SAUSA300_0200
identical protein binding	14	0.600072	1.53427	0.0827887	0.293333	8	rocD,mscL,clpP,pycA,essB,esaA,rnjB,pyrG
magnesium ion binding	56	0.438639	1.33558	0.103	0.298158	33	thiM,prs,thiE,bioW,menC,rpoC,deoB,purA,pheT,purL,topB,pnpA,kdpB,pgcA,ilvB,pykA,cidC,menD,budB,SAUSA300_0190,lysS,purF,murE,bioA,glmM,glmU,eno,obgE,papS,ackA,metK,ribA,sucC
GTP binding	29	0.500621	1.43664	0.102747	0.298158	21	era,rsgA,purA,prfC,fusA,feoB,typA,lepA,infB,trmE,ffh,relA,engA,obgE,ftsY,hflX,tuf,ribA,ftsZ,SAUSA300_1556,ychF
sodium ion transport	13	0.585259	1.4721	0.0994475	0.298158	8	mnhE,SAUSA300_0914,mnhA,SAUSA300_2384,SAUSA300_0617,putP,nanT,alsT
rRNA binding	39	0.470928	1.39184	0.0964824	0.298158	6	rplC,rplV,rplN,rplD,rsgA,rlmN
D-glucosamine PTS permease activity	13	0.587506	1.47775	0.0972376	0.298158	10	glcC,glcB,lacE,glvC,glcA,ptaA,murP,scrA,ulaA,SAUSA300_0241
biosynthetic process	13	0.575273	1.44698	0.111602	0.314775	13	SAUSA300_1025,norG,trpE,SAUSA300_0503,aspB,menF,kbl,patA,SAUSA300_2497,pabB,bioF,SAUSA300_2610,metX
carbohydrate transmembrane transport	26	0.492315	1.38718	0.115108	0.316547	20	mtlF,SAUSA300_2471,glcC,mtlR,SAUSA300_0238,SAUSA300_2575,SAUSA300_0333,lacE,glvC,ptaA,murP,scrA,treP,ulaA,malE,SAUSA300_0241,SAUSA300_0659,SAUSA300_1809,SAUSA300_2507,SAUSA300_0310
peptidoglycan biosynthetic process	22	0.495533	1.37824	0.13354	0.349749	16	sgtB,alr,pbp4,pbp2,murE,murF,glmM,glmU,murD,murC,murT,murA1,murA2,alr2,murG,ddl
nucleic acid phosphodiester bond hydrolysis	46	0.439274	1.3174	0.132265	0.349749	18	SAUSA300_2401,mcsA,nfo,dnaE,uvrA,hsdR,polA,rny/cvfA,recD2,mutS2,recJ,uvrC,mutL,uvrB,hsdM2,polX,recN,hsdM1
ligase activity	25	0.479645	1.34401	0.141393	0.361704	17	panD,ausA,SAUSA300_0133,hslU,fadE,bshC,sfnaD,sbnF,sbnC,sbnE,acsA,SAUSA300_2542,vraA,femA,kbl,capJ,bioF
transaminase activity	28	0.462342	1.32358	0.156028	0.390071	22	treR,norG,SAUSA300_0503,SAUSA300_2539,SAUSA300_0458,SAUSA300_1651,gsaB,hemL,aspB,argJ,sufS,SAUSA300_1199,glyA,kbl,SAUSA300_1669,patA,SAUSA300_2497,iscS,bioF,gcvT,SAUSA300_1214,SAUSA300_2610
helicase activity	17	0.506071	1.33239	0.169872	0.399129	9	SAUSA300_2315,recQ2,dnaB,cshA,secA,secA2,SAUSA300_0146,SAUSA300_2021,rho
regulation of transcription, DNA-templated	117	0.374841	1.19383	0.171828	0.399129	26	walR,sarR,walK,saeR,sarT,rsp,sarX,vraR,hssR,treR,sarU,hptR,malR,graS,nusA,SAUSA300_1560,norG,SAUSA300_2431,mtlR,clpL,SAUSA300_0238,SAUSA300_2248,SAUSA300_2575,SAUSA300_0333,rbf,phoR
zinc ion binding	46	0.412383	1.23676	0.186373	0.399129	24	mcsA,alaS,nfo,manA,rpoC,clpX,cysS,uvrA,ileS,priA,metE,rnjA,metF,dnaG,rnjB,SAUSA300_2351,ftsH,gltX,SAUSA300_1697,murT,pyrC,glyA,hutI,pepT
regulation of cell shape	25	0.454242	1.27283	0.1875	0.399129	17	sgtB,pbp4,murE,murF,glmU,murD,murC,murT,femA,murA1,femB,murA2,fmhA,fmhC,rodA,murG,ddl
menaquinone biosynthetic process	13	0.516784	1.29986	0.185635	0.399129	8	menC,ilvB,cidC,ilvD,menD,budB,SAUSA300_0190,menE
SOS response	18	0.485693	1.29724	0.183263	0.399129	14	mcsA,uvrA,cshA,recG,uvrC,uvrB,recQ1,recN,cshB,sbcD,recF,recA,dinP,ruvB
cell wall macromolecule biosynthetic process	12	0.528257	1.30597	0.188679	0.399129	10	tarL',tarL,SAUSA300_2314,femA,femX,femB,fmhA,fmhC,tarF,tagB
cell division	31	0.438241	1.2702	0.18541	0.399129	18	scpB,SAUSA300_2213,xerC,essC,SAUSA300_1560,clpX,murE,SAUSA300_1482,murF,murD,spoIIIE,murC,tig,murA1,murA2,ftsY,ftsW,rodA
peptidase activity	24	0.449638	1.25717	0.209278	0.423094	7	SAUSA300_2335,clpC,SAUSA300_1534,clpX,hslU,clpB,clpL
peptidoglycan-based cell wall biogenesis	11	0.51741	1.25411	0.219239	0.423094	9	tarL',tarL,SAUSA300_2314,femA,femB,fmhA,fmhC,tarF,tagB
transferase activity, transferring acyl groups	15	0.492361	1.27465	0.217204	0.423094	9	SAUSA300_1070,ausA,SAUSA300_0601,SAUSA300_1905,vraA,pdhC,bmfBB,dltB,kbl
cell wall organization	43	0.407517	1.21533	0.216867	0.423094	30	sgtB,lytH,gdpS,pbp4,pbp3,ltaS,lytS,murE,tarM,murF,glmU,murD,pbp1,murC,murT,femA,murA1,femB,murA2,fmhA,fmhC,SAUSA300_0958,lytN,murG,ddl,tagO,SAUSA300_1480,sle1,msrR,mraY
catalytic activity, acting on a protein	15	0.494239	1.27951	0.215054	0.423094	10	atpH,SAUSA300_0604,SAUSA300_0601,sucB,flp,pdhC,bmfBB,SAUSA300_1569,hmrA,lytN
nucleotide binding	25	0.436488	1.22308	0.235656	0.439358	21	SAUSA300_1050,SAUSA300_2315,capE,graS,dynA,adsA,SAUSA300_0147,SAUSA300_0925,gtfA,SAUSA300_0828,femA,fmhA,fmhC,mnaA,airS,aroB,ilvA1,sirTM,sucD,nsaS,kdpD
ATPase-coupled transmembrane transporter activity	10	0.517198	1.23385	0.23269	0.439358	6	abcA,SAUSA300_2374,SAUSA300_2375,SAUSA300_1847,SAUSA300_0671,SAUSA300_0670
kinase activity	43	0.396182	1.18153	0.254016	0.458292	17	prs,mtlF,cap1C,fruC,SAUSA300_1671,glcC,pckA,glcB,pykA,ptsI,lacE,glvC,glcA,ptaA,murP,scrA,treP
proton transmembrane transport	13	0.482675	1.21407	0.254144	0.458292	7	SAUSA300_2384,SAUSA300_0617,fruA,cpaA,manP,lctP2,lctP1
DNA repair	28	0.408932	1.17068	0.276596	0.490734	10	mcsA,comEA,hchA,nfo,polA,recJ,recG,ligA,recQ1,recN
catalytic activity	17	0.442225	1.16429	0.297009	0.518586	15	saeR,SAUSA300_0538,SAUSA300_0859,cidC,SAUSA300_1858,capF,mupG,SAUSA300_0329,bfmBAB,pdhB,SAUSA300_1706,graX,SAUSA300_0753,SAUSA300_1183,SAUSA300_2387
cellular amino acid biosynthetic process	14	0.446955	1.14278	0.313725	0.539216	11	dat,fumC,aroA,purB,ilvA2,aroC,aroA2,aroB,arcB,argF,arcB
metalloendopeptidase activity	11	0.472364	1.14493	0.319911	0.541387	6	lyrA,SAUSA300_1278,sasF,pepF,aur,ftsH
RNA binding	46	0.370208	1.11027	0.326653	0.544422	12	SAUSA300_1554,scpB,splE,rluB,SAUSA300_1036,SAUSA300_0909,nusA,citB,rny/cvfA,rnr,rnjA,pnpA
nucleic acid binding	31	0.382031	1.10728	0.338399	0.548749	13	prmC,rpsA,dnaE,asnC,recQ2,cshA,recJ,recG,aspS,gdpP,lysS,SAUSA300_2021,xseA
serine-type endopeptidase activity	13	0.444102	1.11705	0.339227	0.548749	7	clpP,sspA,SAUSA300_1509,htrA2,epiP,radA,htrA1
DNA replication	20	0.406847	1.11249	0.354298	0.556754	7	scpB,holA,rarA,dnaE,dnaX,ligA,recQ1
manganese ion binding	13	0.437531	1.10052	0.350276	0.556754	8	cap1C,hutG,deoB,menD,pgm,pepZ,ribA,SAUSA300_0534
ribosome	54	0.353795	1.07704	0.371	0.574789	4	rplC,rpmH,nusG,rplD
integral component of plasma membrane	25	0.380443	1.06603	0.397541	0.58306	10	mscL,kdpC,pstA,divIB,kdpB,kdpA,lctP2,lctP1,arcD,arcD
cell cycle	16	0.406706	1.06324	0.395075	0.58306	13	xerC,murE,murF,murD,spoIIIE,murC,tig,murA1,murA2,murG,mraY,whiA,xerD
nickel cation transport	32	0.366208	1.06746	0.39556	0.58306	32	opuCB,pstA,pstC,opp-2B,SAUSA300_0202,SAUSA300_0201,cntA,SAUSA300_0073,opuBB,SAUSA300_1808,malF,opp-3C,opp-4B,opp-3B,cntB,opp-3B,opp-4C,cnzC,SAUSA300_0211,opp-2C,phnE1,cntD,potC,phnE2,potB,opp-3C,ssuC,tcyB,metP1,opuCD,modB,metP2
DNA biosynthetic process	14	0.414365	1.05945	0.385621	0.58306	9	holA,dnaE,polA,dnaX,polX,SAUSA300_1259,dnaN,recF,dinP
DNA-directed DNA polymerase activity	11	0.434455	1.05304	0.404922	0.586071	4	holA,dnaE,polA,dnaX
carbohydrate derivative biosynthetic process	10	0.43348	1.03413	0.415437	0.593481	7	pgcA,glmS,tarL',tarL,SAUSA300_2314,tarF,tagB
transferase activity, transferring glycosyl groups	13	0.407956	1.02613	0.424309	0.598385	13	glmS,gtfA,SAUSA300_1637,bshA,crtQ,tagX,csbB,sgtA,pdxS,icaB,hisZ,SAUSA300_0326,queE
phosphorylation	86	0.328713	1.02401	0.433566	0.6037	25	udk,thiM,prs,mtlF,cmk,hptR,cap1C,thrB,lacC,fruC,SAUSA300_1671,glpK,glcC,gntK,pckA,glcB,ptsI,lacE,fakA,glvC,glcA,ptaA,murP,scrA,treP
DNA-binding transcription factor activity	72	0.331372	1.021	0.442	0.60465	11	sarR,sarT,rsp,rsbW,treR,sarU,hptR,nusA,SAUSA300_1560,norG,SAUSA300_2431
endopeptidase activity	10	0.417073	0.994985	0.46311	0.60465	2	splE,splC
endonuclease activity	20	0.363776	0.994714	0.483229	0.60465	6	SAUSA300_2401,rny/cvfA,mutS2,mutL,hsdM2,hsdM1
extracellular region	84	0.321249	0.999245	0.484515	0.60465	20	isaB,isdH,clfB,ssl1,ssl10,sdrC,splE,splC,lytH,sspA,sasA,sdrD,fnbA,fnbB,clfA,gehB,gehA,ltaS,isdB,SAUSA300_2579
carbohydrate metabolic process	28	0.351	1.00484	0.462006	0.60465	21	manA,potA,citZ,nagA,bglA,pgcA,glmS,malA,ptaA,SAUSA300_0503,glmM,SAUSA300_2614,hysA,murG,icaC,galM,pmi,hprK,murQ,nanA,icaB
peptide transport	12	0.39883	0.986002	0.476138	0.60465	12	opp-4D,opp-4A,cntA,SAUSA300_0200,opp-3D,opp-4F,opp-3F,SAUSA300_0352,opp-2D,SAUSA300_0076,cntF,opp-2F
ATP-binding cassette (ABC) transporter complex	19	0.37586	1.01205	0.450212	0.60465	18	potA,opp-4A,opp-3A,cntA,SAUSA300_0073,opuBB,opp-5A,SAUSA300_1808,phnD,opuCC,znuB,mntB,tagG,phnE2,znuC,SAUSA300_2103,SAUSA300_1218,tcyB
metal ion binding	164	0.309422	1.00517	0.471528	0.60465	81	stp1,walK,tgt,SAUSA300_1050,isdH,radC,sdhB,SAUSA300_0544,rsgA,hemB,pycA,rlmN,nagA,ampS,carB,mtaB,citB,secA,miaB,pckA,adsA,gehB,gehA,copA,ligA,parE,SAUSA300_1278,ltaS,isdB,thrS,tkt,pepF,gyrB,ptsI,gdpP,ilvD,fepC,pyrG,topA,SAUSA300_0147,aur,SAUSA300_0925,mgtE,tcaA,trmE,epiP,leuC,radA,cydA,SAUSA300_1563,accC,mntH,glnA,pdp,SAUSA300_1172,folC,SAUSA300_1171,moeA,purD,hflX,SAUSA300_1976,coaBC,SAUSA300_20…
RNA phosphodiester bond hydrolysis, endonucleolytic	10	0.40881	0.975273	0.489217	0.60465	3	rnpA,rnjA,rnjB
cation transmembrane transport	15	0.382307	0.989733	0.469892	0.60465	10	mnhE,brnQ1,copA,ktrD,brnQ3,ktrB,brnQ2,copA,czrB,SAUSA300_0171
glycolytic process	11	0.383476	0.92948	0.536913	0.656227	11	pykA,pgm,pgi,eno,pdhC,pgk,glk,fdaB,fbaA,tpiA,gpmA
DNA recombination	22	0.333727	0.928206	0.552795	0.668214	13	recQ2,priA,ccrB,recJ,recG,tkt,recQ1,recN,ccrA,int,sbcD,recA,ruvB
protein folding	10	0.374742	0.893998	0.582293	0.674234	7	ppiB,clpX,dnaK,tig,dnaJ,prsA,hslO
metallopeptidase activity	10	0.382621	0.912796	0.568672	0.674234	8	radC,ampS,SAUSA300_1697,pepT,prsS,pepQ,lytM,SAUSA300_2162
cation transmembrane transporter activity	14	0.350707	0.896691	0.574074	0.674234	6	mnhE,brnQ1,ktrD,brnQ3,ktrB,brnQ2
carbohydrate derivative binding	10	0.375381	0.895523	0.580023	0.674234	9	graS,glmS,murQ,nsaS,SAUSA300_2264,murR,kdpD,nanR,SAUSA300_2271
4 iron, 4 sulfur cluster binding	19	0.318783	0.858363	0.617585	0.707649	13	rlmN,mtaB,citB,miaB,ilvD,leuC,mutY,nreB,moaA,bioB,SAUSA300_1706,lipA,sdaAA
glutamine metabolic process	12	0.339327	0.838896	0.647059	0.733778	5	carB,glmS,pyrG,guaA,purF
isomerase activity	23	0.302158	0.840887	0.654283	0.734399	2	SAUSA300_1690,scpB
'de novo' IMP biosynthetic process	12	0.32938	0.814304	0.674806	0.749784	7	purL,purF,purH,purB,purD,purK,purM
ribonucleoprotein complex	32	0.284474	0.829215	0.685166	0.753683	1	rplC
membrane	18	0.296608	0.792213	0.715042	0.778759	13	ssuB,sasA,mecA,menE,pbp1,opuCA,qoxA,opuBA,SAUSA300_1194,isdE,metQ2,metQ1,lpl5
cytosol	107	0.264366	0.835569	0.78022	0.833366	26	rplC,tgt,gcvH,nusG,mutS,SAUSA300_1050,lacC,hemB,alr,rpsA,fabF,bglA,citB,glpK,ligA,tkt,pykA,ilvD,SAUSA300_0190,pyrG,guaA,leuA,purH,pncB,lacG,dnaC
methyltransferase activity	25	0.255629	0.716296	0.78791	0.833366	10	rsmC,SAUSA300_1550,mnmA,rbf,radA,glyA,SAUSA300_1561,SAUSA300_0483,SAUSA300_0981,SAUSA300_1336
dephosphorylation	25	0.25691	0.719885	0.781762	0.833366	24	hptR,SAUSA300_0307,adsA,fbp,SAUSA300_0147,SAUSA300_0925,phoB,SAUSA300_0828,rsbU,uppP,SAUSA300_0874,SAUSA300_2464,nagD,SAUSA300_0600,SAUSA300_1069,SAUSA300_0540,SAUSA300_0429,SAUSA300_0740,SAUSA300_0557,SAUSA300_2450,SAUSA300_0375,SAUSA300_0783,SAUSA300_0709,SAUSA300_1557
gluconeogenesis	12	0.278655	0.6889	0.803552	0.841816	5	pycA,pckA,fbp,pgi,pgk
hydrolase activity	134	0.252855	0.811832	0.832168	0.862058	99	atpH,pncA,pmtC,SAUSA300_0871,comEC,kdpC,sdrC,vraD,SAUSA300_0604,SAUSA300_0601,SAUSA300_0544,htrB,SAUSA300_1671,SAUSA300_2431,atpD,cls2,SAUSA300_0809,kdpB,thrS,gdpP,kdpA,SAUSA300_1852,SAUSA300_0925,atpA,gtfA,flp,SAUSA300_0042,cls1,gatA,relA,cstB,engA,SAUSA300_1569,int,SAUSA300_0483,fmtA,hmrA,SAUSA300_0534,acuC,lytN,copA,SAUSA300_1519,comFA,SAUSA300_0641,SAUSA300_2517,SAUSA300_0044,SAUSA300_0702,ri…
methylation	32	0.235158	0.685465	0.838547	0.862058	16	rsmC,SAUSA300_1550,mnmA,metE,metF,rbf,radA,glyA,SAUSA300_1561,SAUSA300_0483,SAUSA300_0981,SAUSA300_1336,gcvT,hemE,nasF,thyA
lyase activity	44	0.228248	0.681608	0.872618	0.888777	32	rluB,dat,capE,pflB,uvrC,menD,SAUSA300_0677,sufS,argD,metC,mccB,cvfC,SAUSA300_1898,ilvE,mutY,SAUSA300_1214,SAUSA300_2610,trpD,cysK,sbnA,SAUSA300_1090,truB,mccA,SAUSA300_1304,capC,hisF,pflA,nirR,SAUSA300_0701,bglR,SAUSA300_1173,SAUSA300_1699
fatty acid biosynthetic process	15	0.181165	0.469007	0.969892	0.978791	8	fabF,accC,mvaS,plsX,accA,fabH,fabD,accD
transferase activity	60	0.137863	0.420871	0.996	0.996	38	bioW,SAUSA300_1025,SAUSA300_1560,uvrC,ltaS,tarS,asp1,guaA,tarM,gatA,gatB,gtfB,accC,int,SAUSA300_0958,capL,metC,capI,cstA,queA,SAUSA300_0702,SAUSA300_0749,sirTM,miaA,sbnA,uppP,rplB,SAUSA300_2215,fruR,lacR,gatD,cobB,SAUSA300_1695,SAUSA300_0701,kdpE,SAUSA300_0131,purQ,tsaB
