# Supplementary figures and images for: Niche-specific genome degradation and convergent evolution shaping Staphylococcus aureus adaptation during severe infections
Source: eLife journal article supplement (doi:10.7554/elife.77195), 2022-06-08

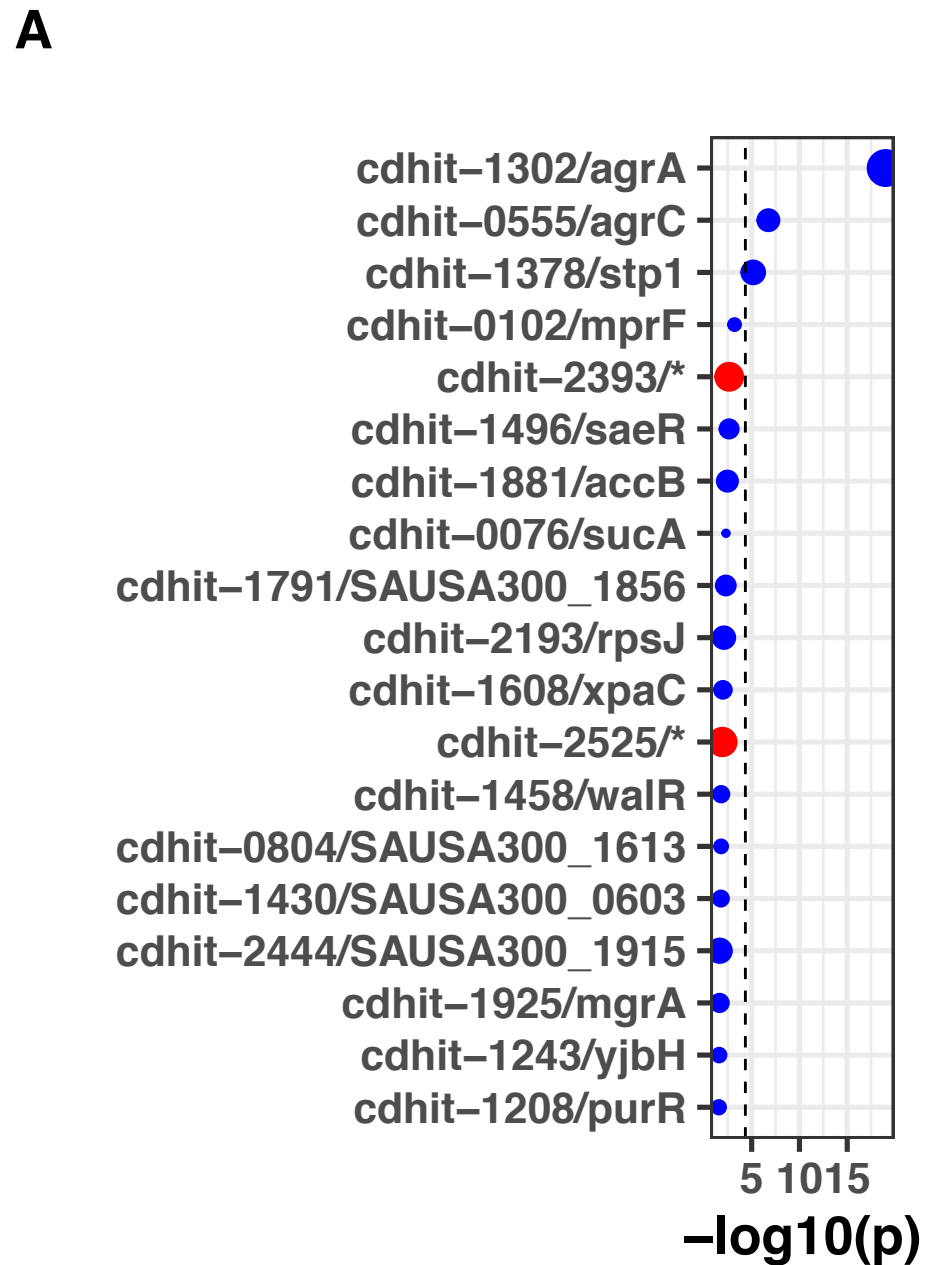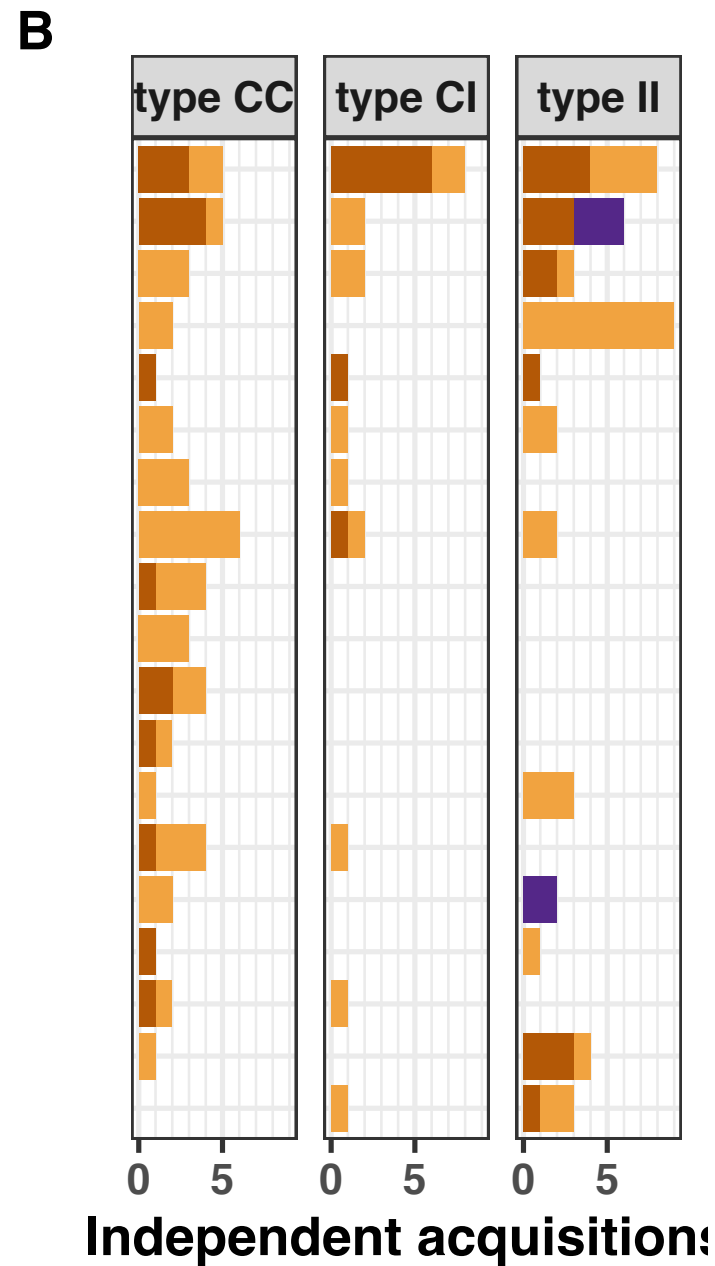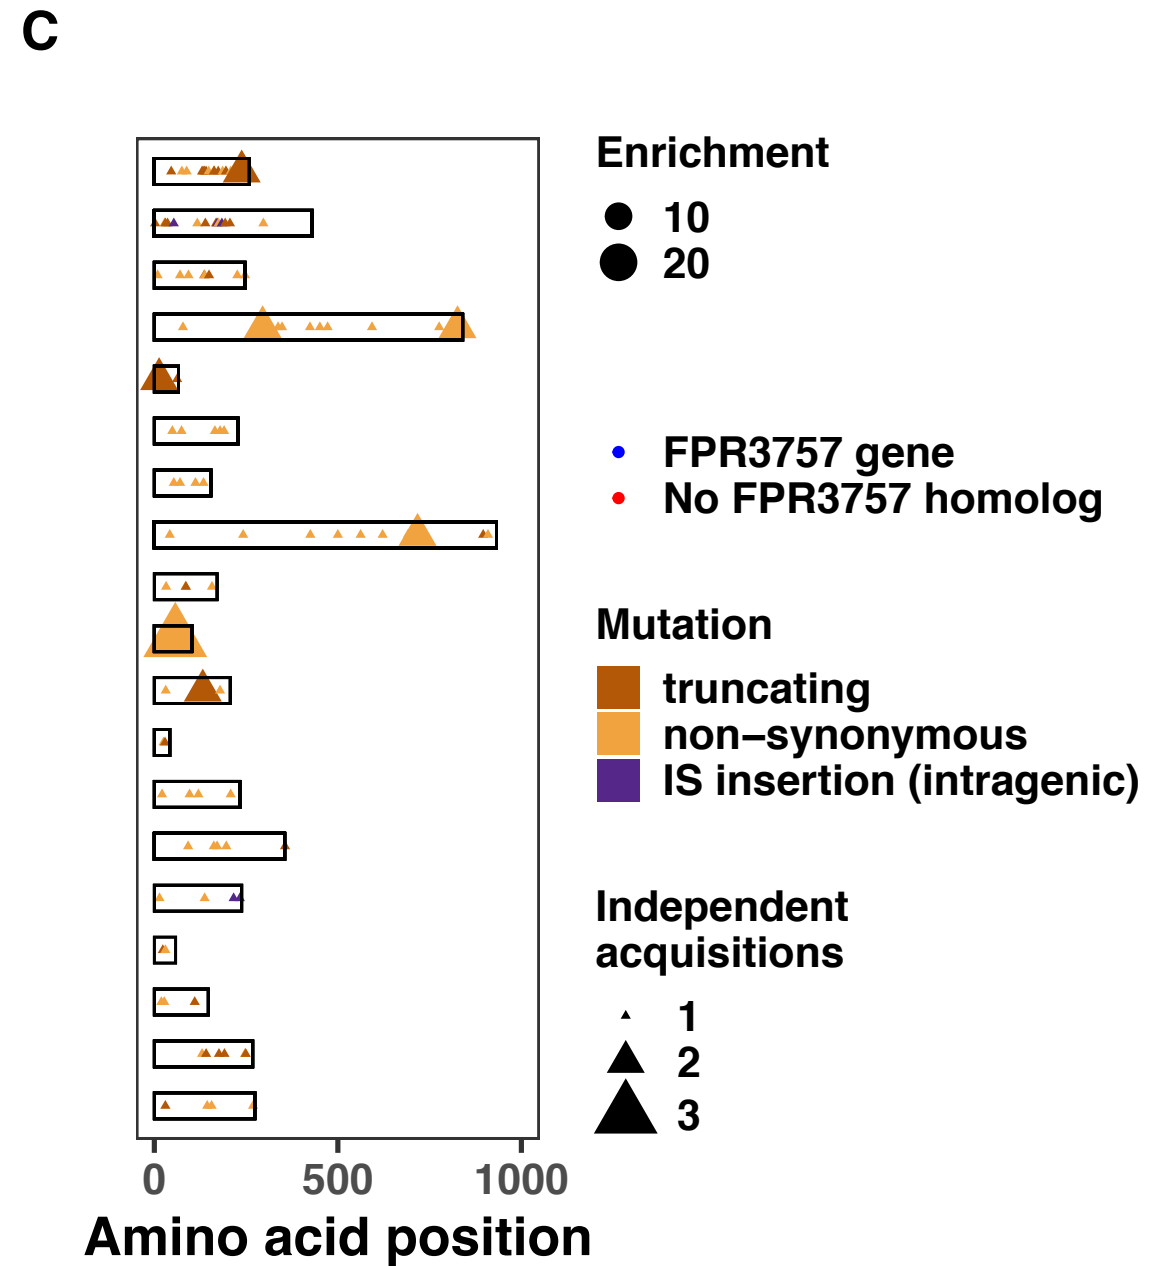

Supplement: supp [file elife-77195-supp-v1.zip]

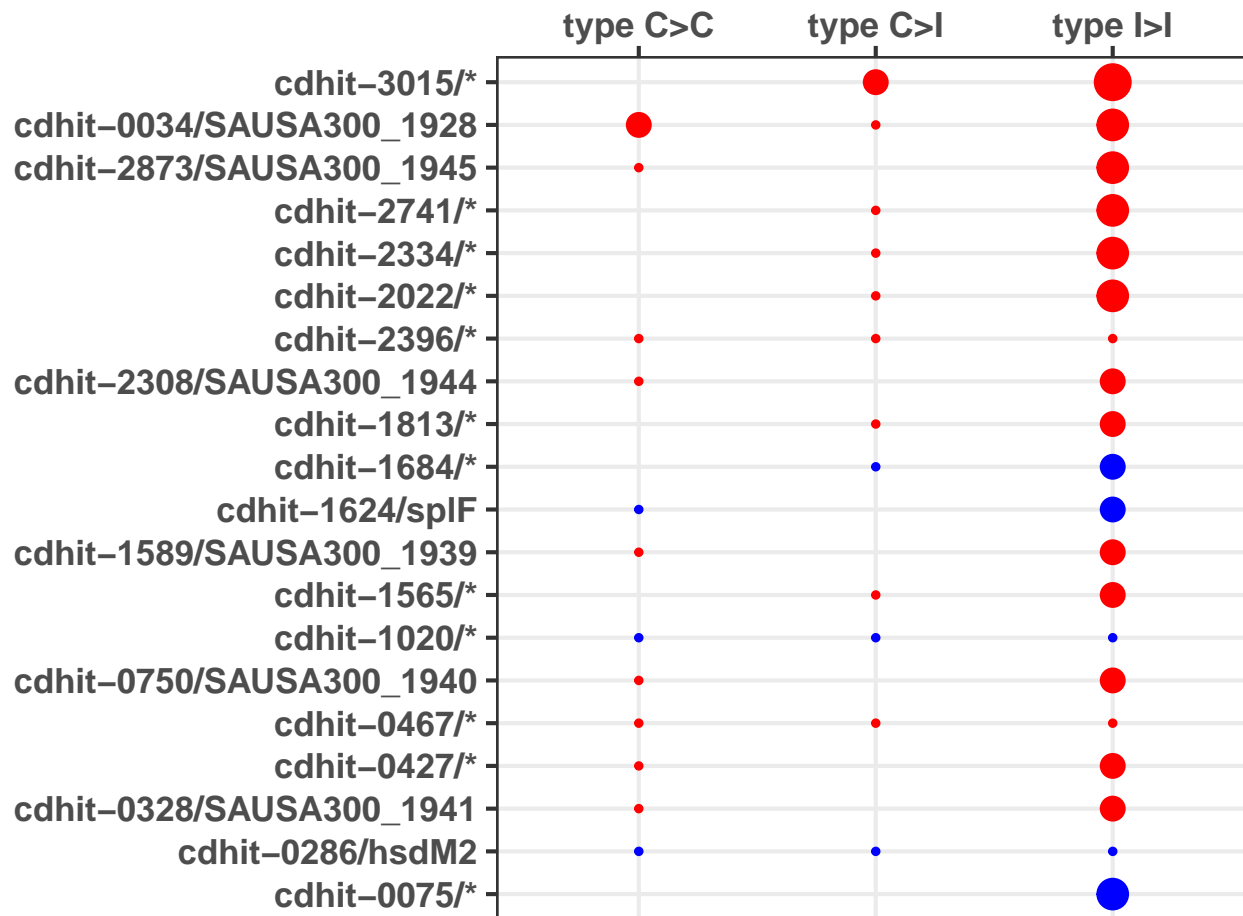

## Phage gene

- No
- Yes

## Independent deletions

- 1
- 2
- 3
- 4

Supplement: supp [file elife-77195-supp-v1.zip]

**A**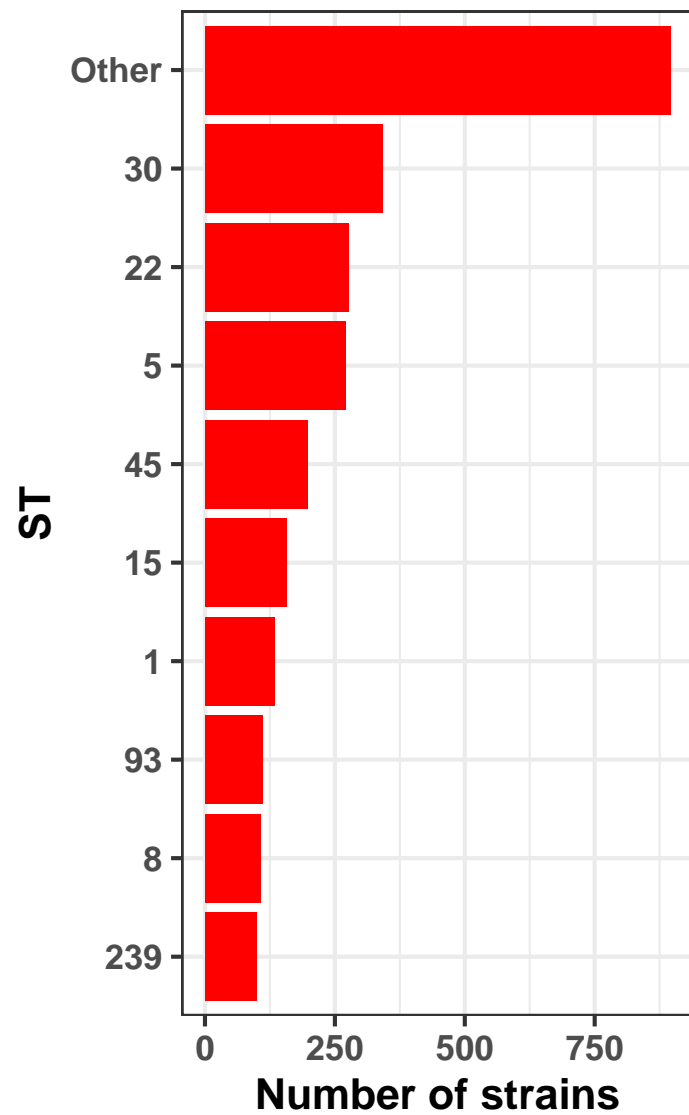**B**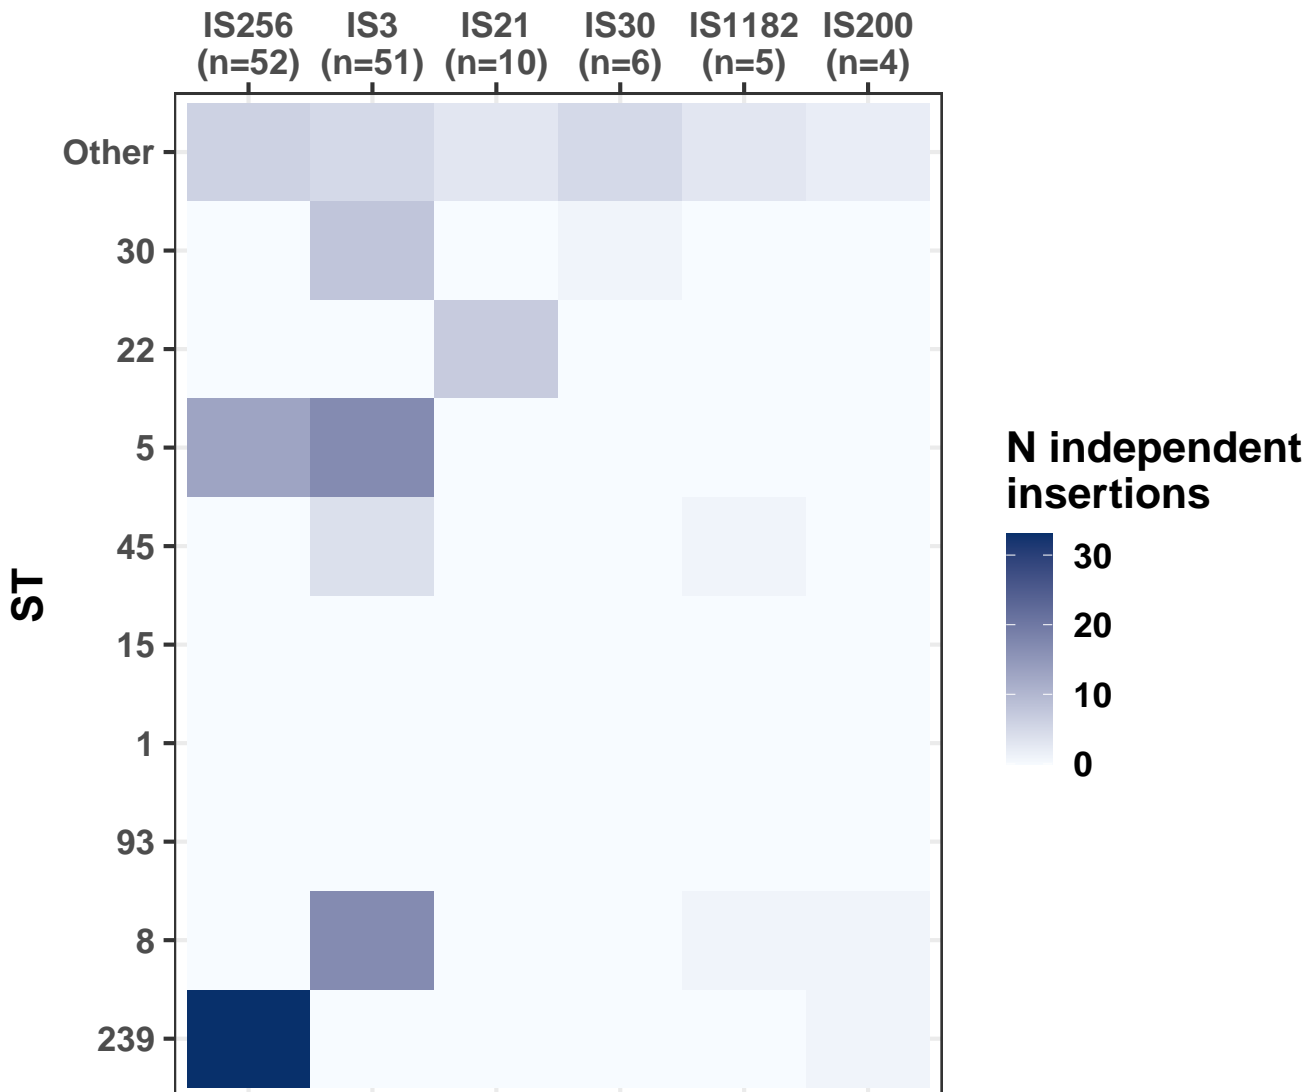

Supplement: supp [file elife-77195-supp-v1.zip]

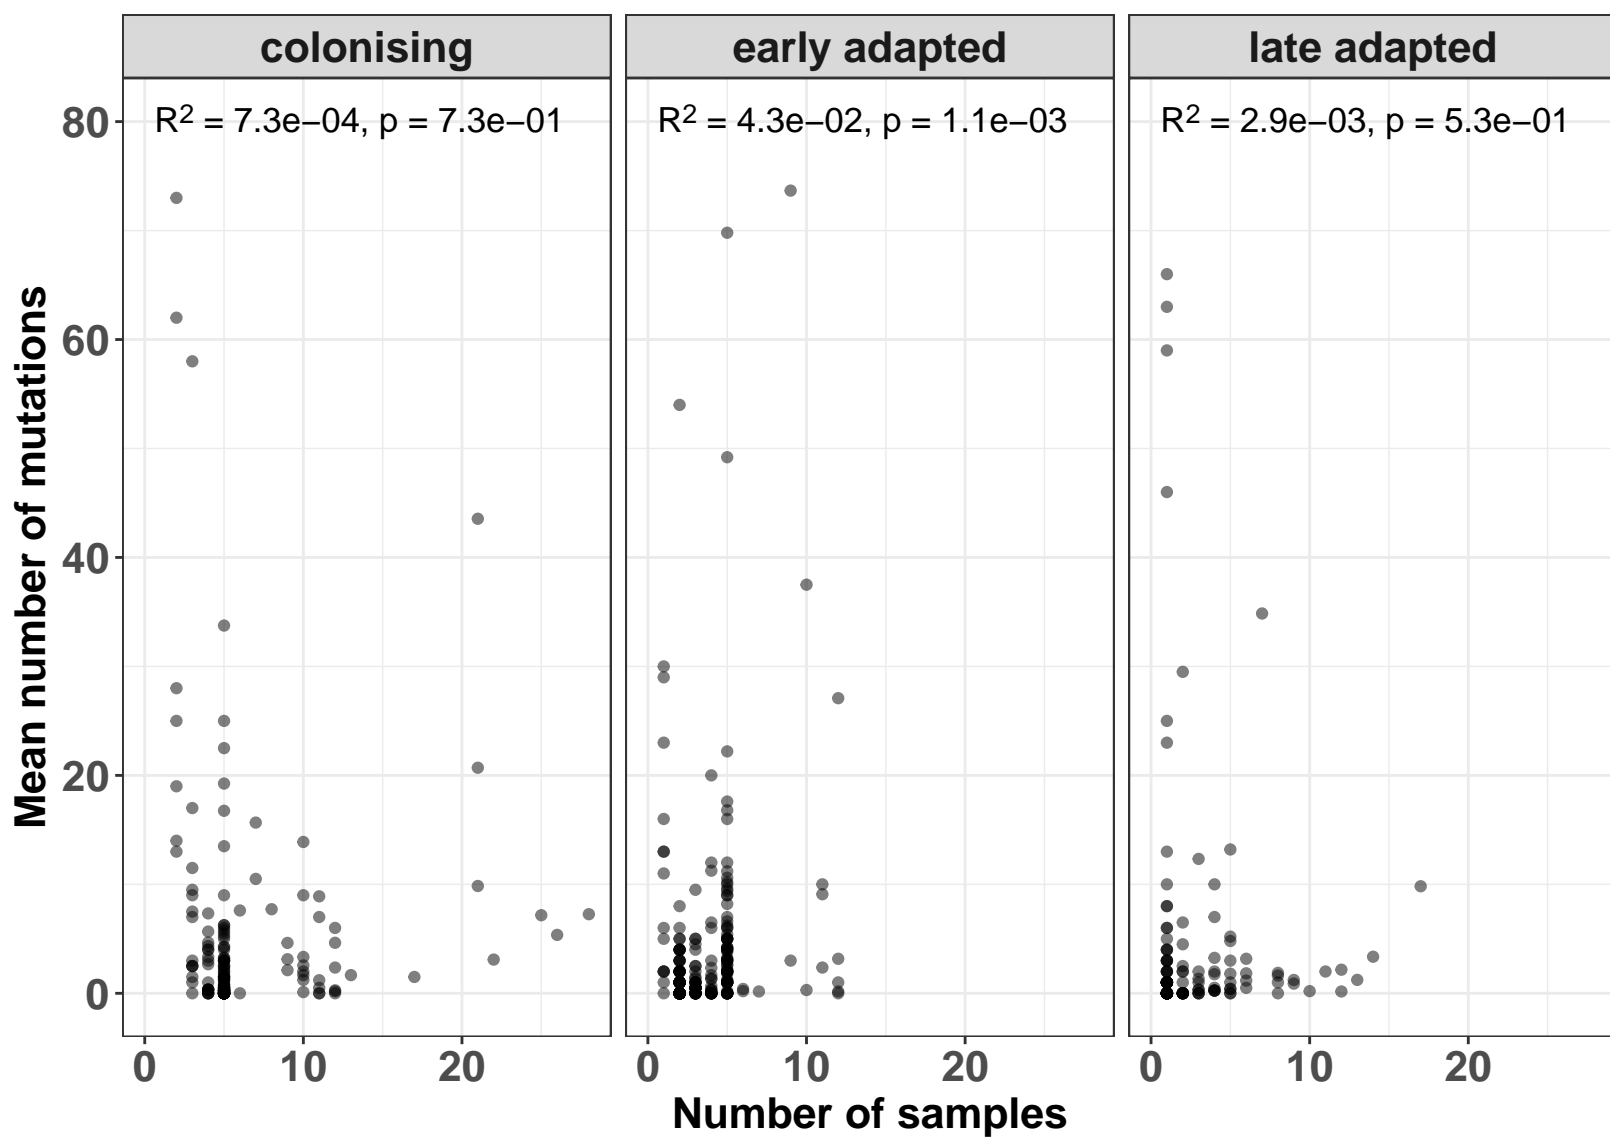

Supplement: supp [file elife-77195-supp-v1.zip]

Infection episode

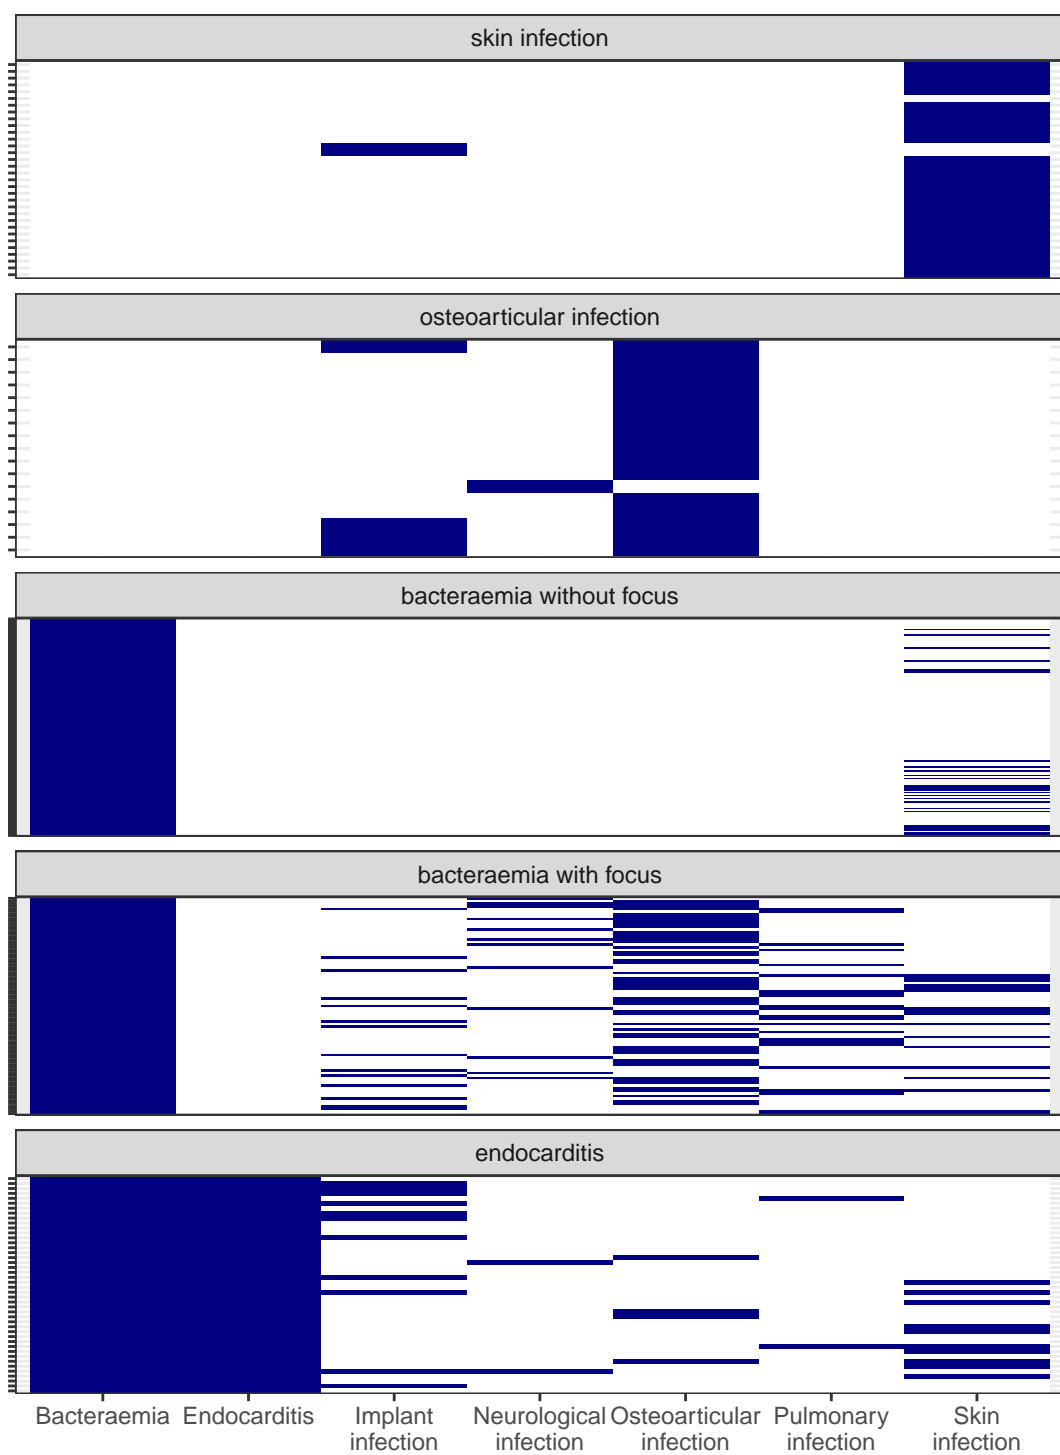

Supplement: supp [file elife-77195-supp-v1.zip]

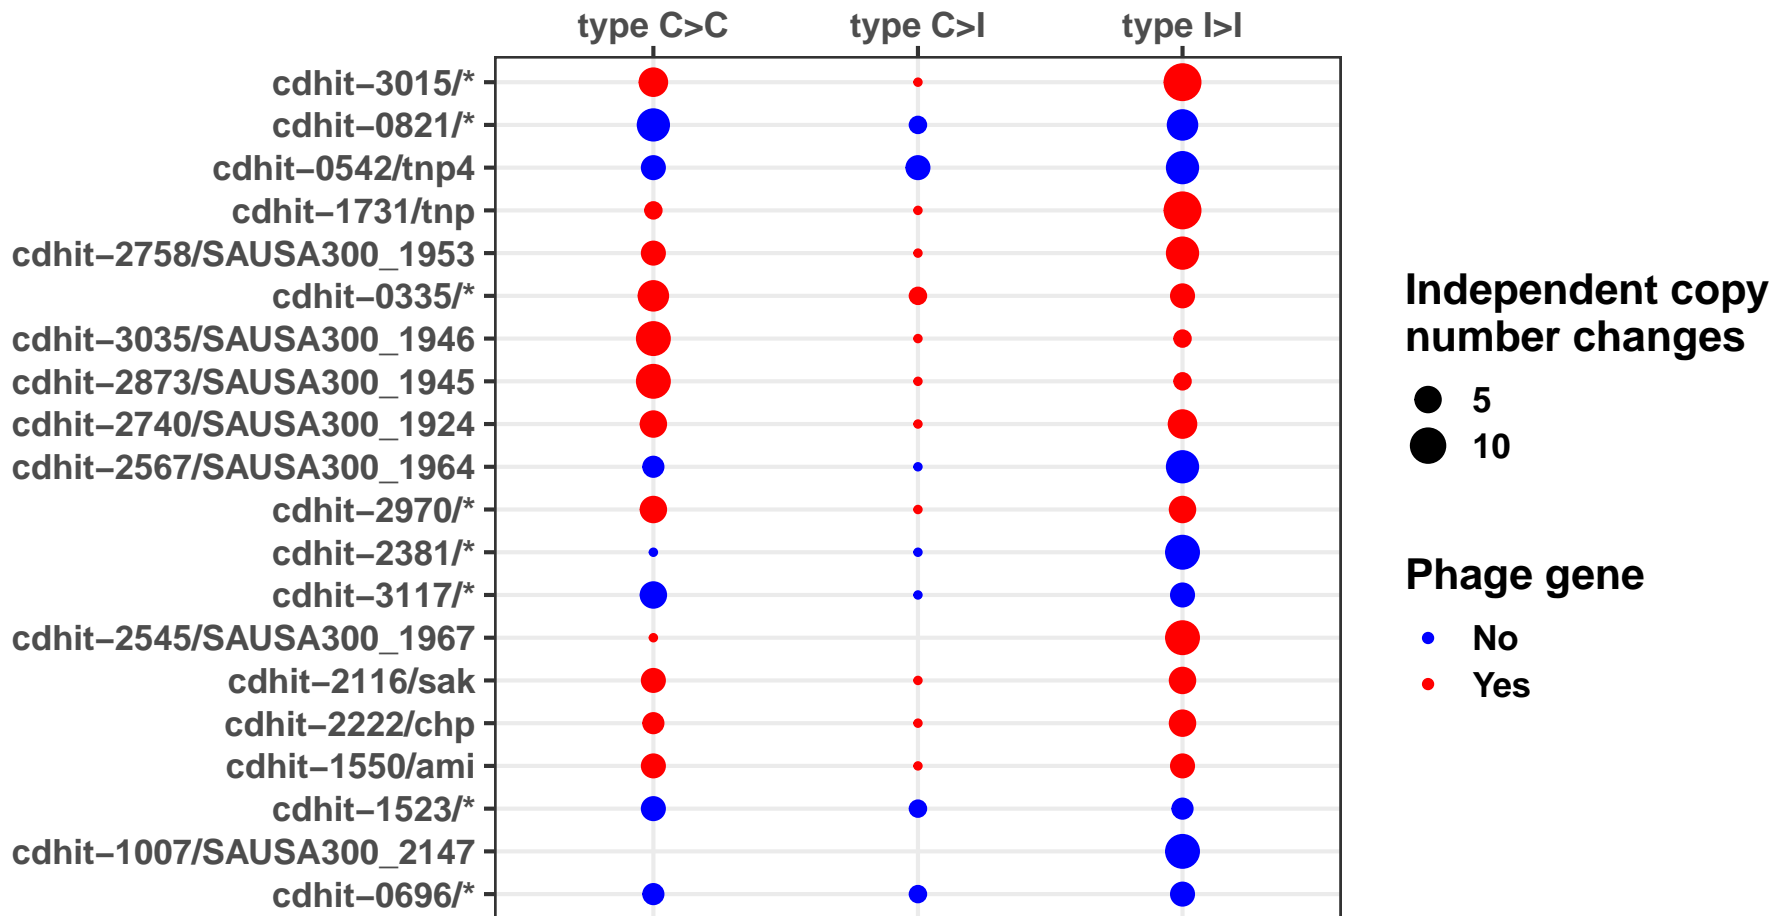

Supplement: supp [file elife-77195-supp-v1.zip]

$-\log_{10}(\text{p value})$

type CC

type CI

type II

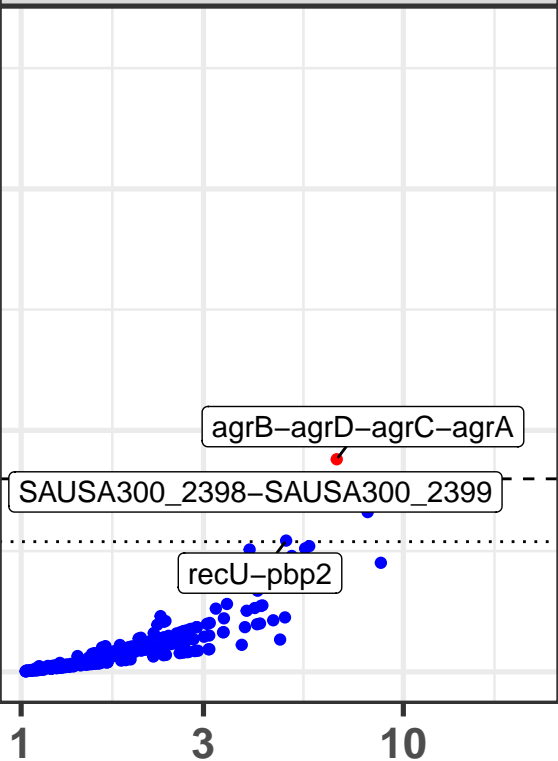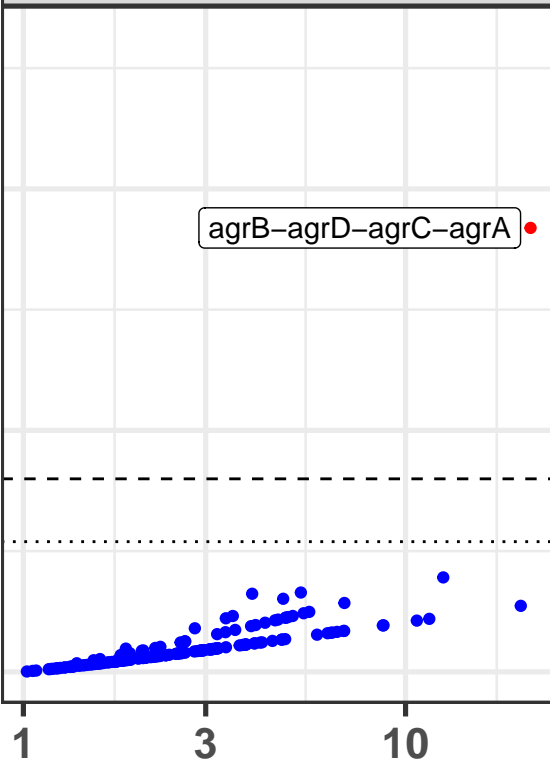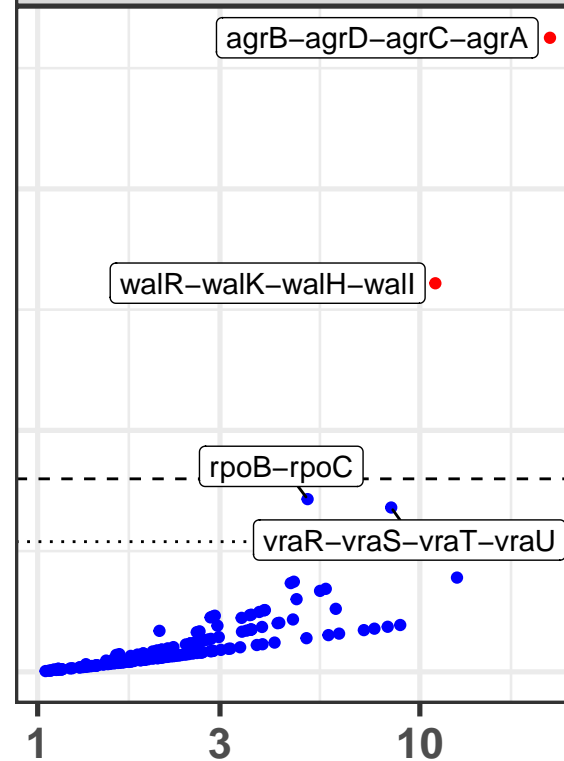

Enrichment

Supplement: supp [file elife-77195-supp-v1.zip]

Number of episode-specific variants

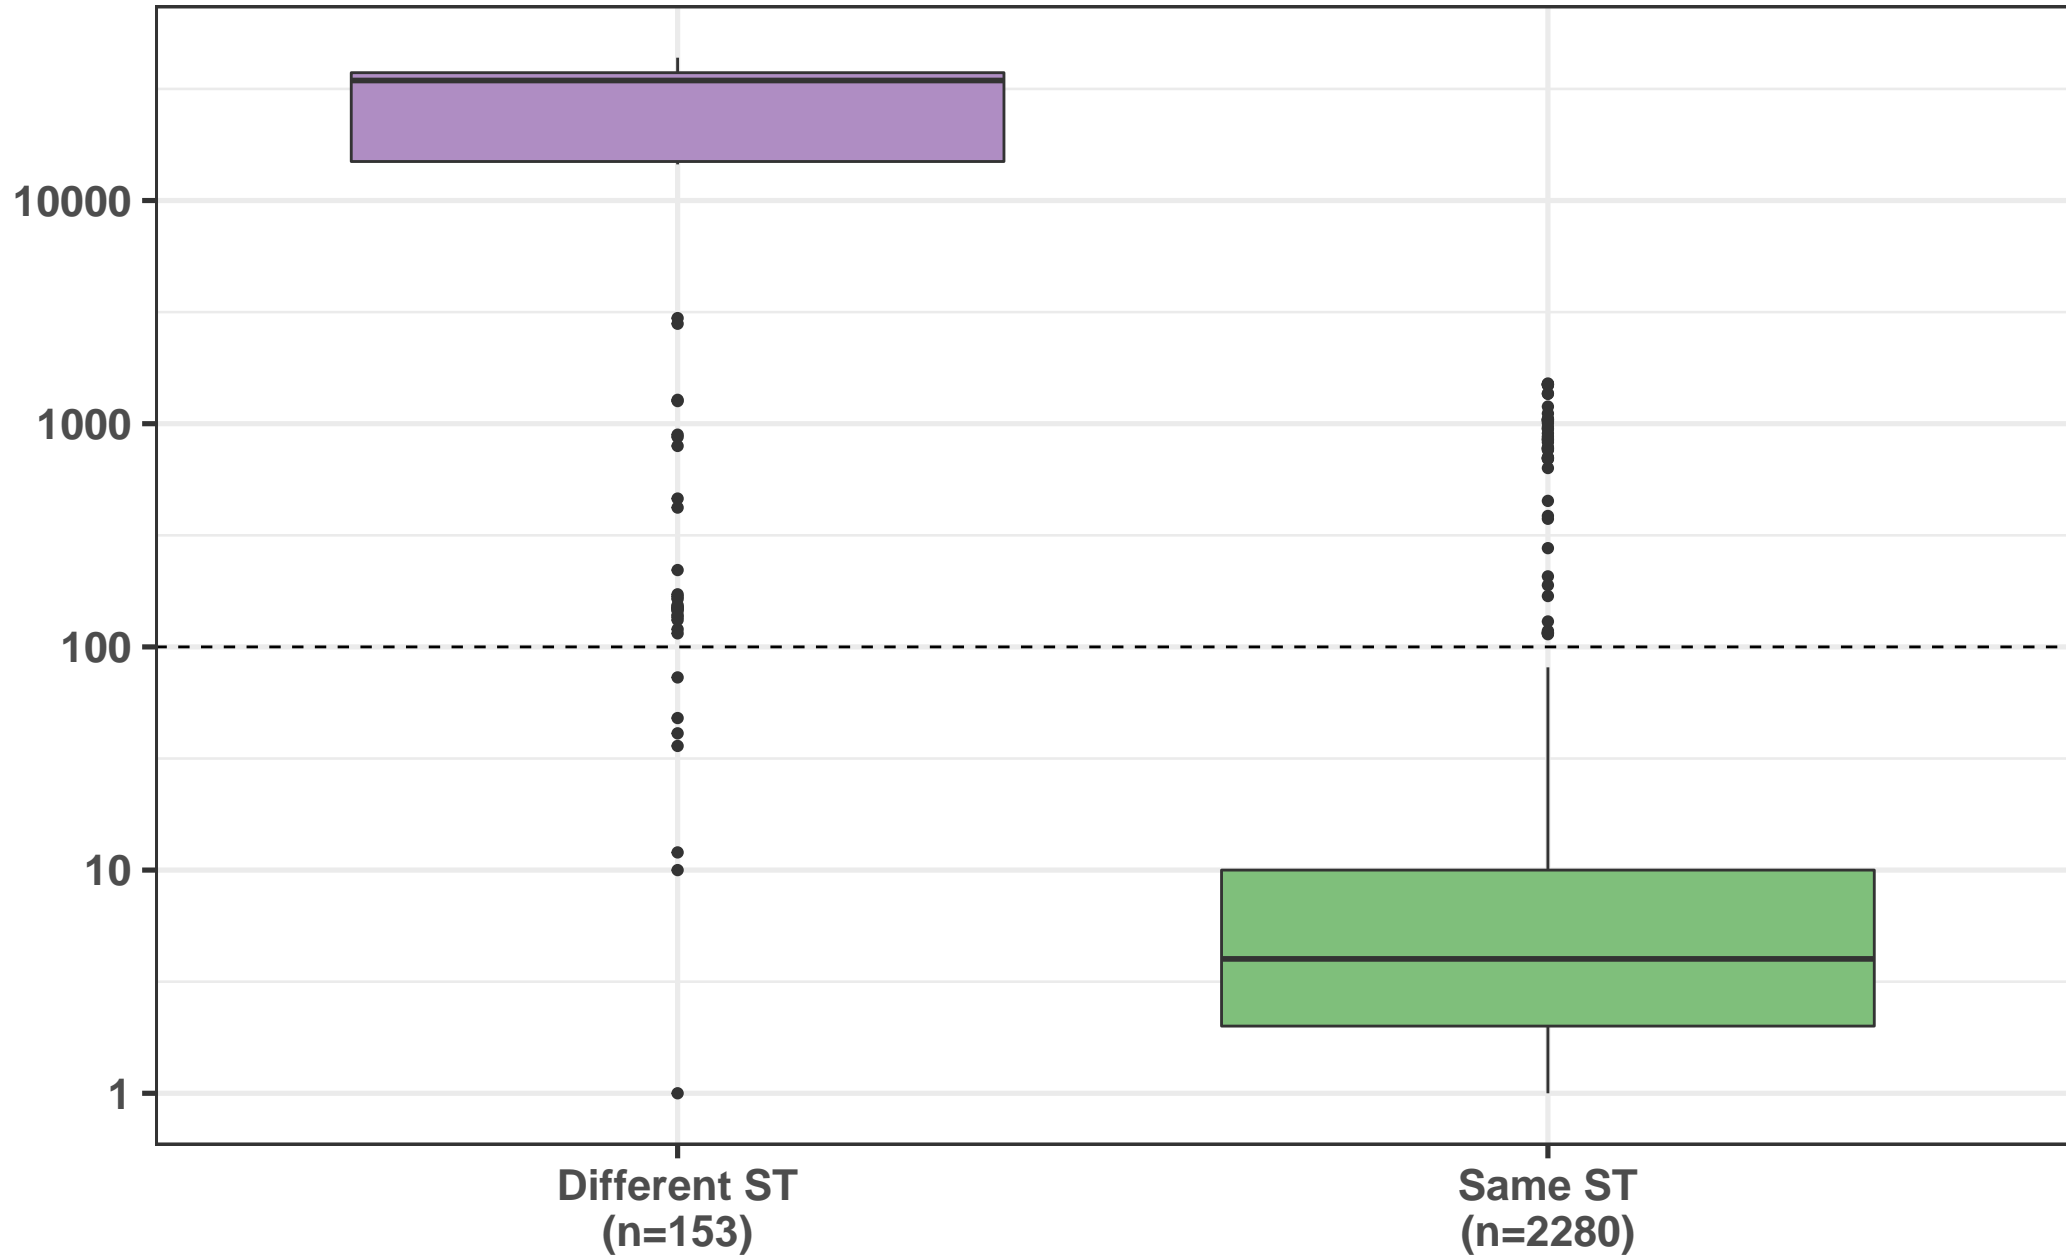

Supplement: supp [file elife-77195-supp-v1.zip]

A

## Missense mutations

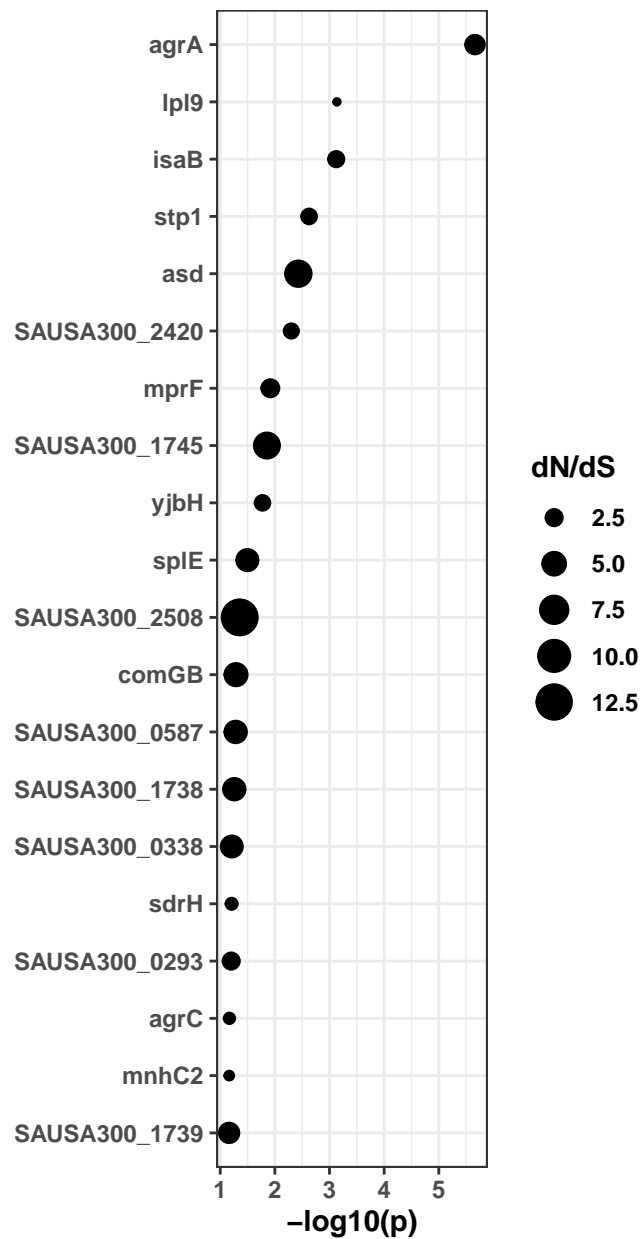

B

## Nonsense mutations

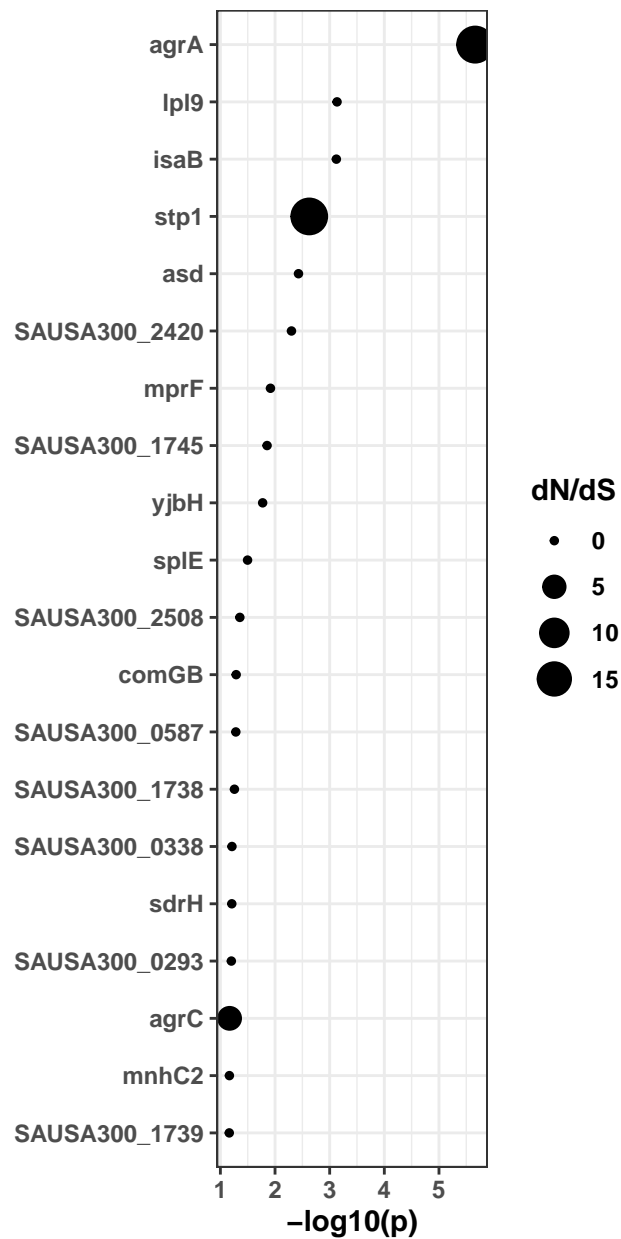

C

## Indels

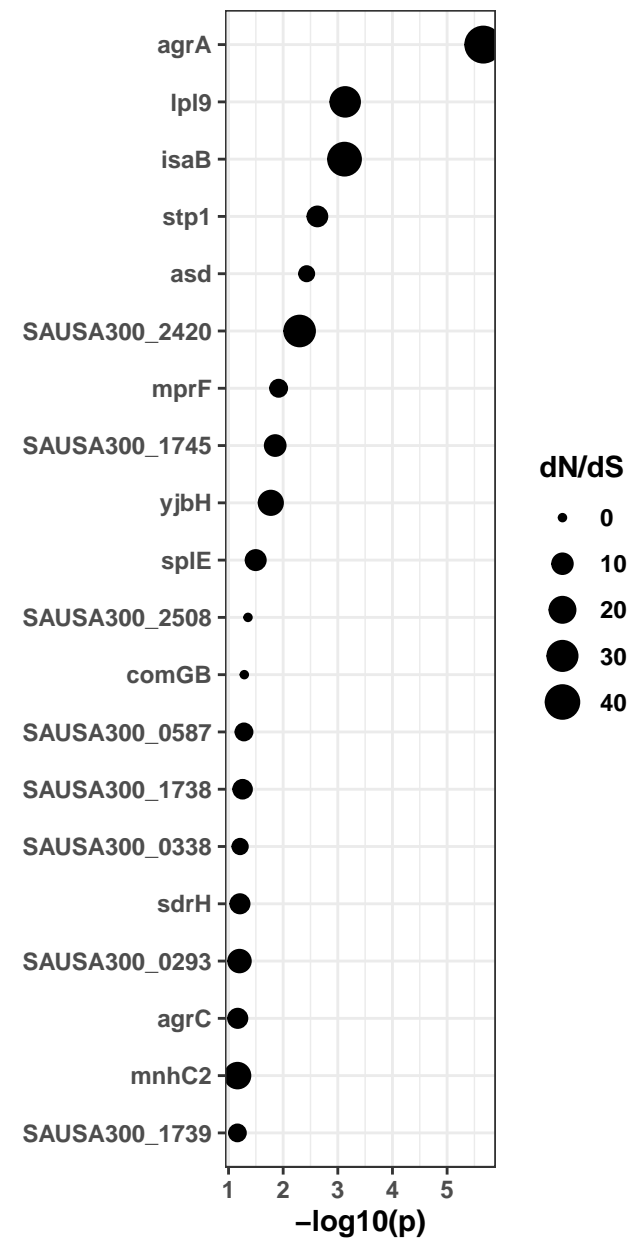

Supplement: supp [file elife-77195-supp-v1.zip]

A

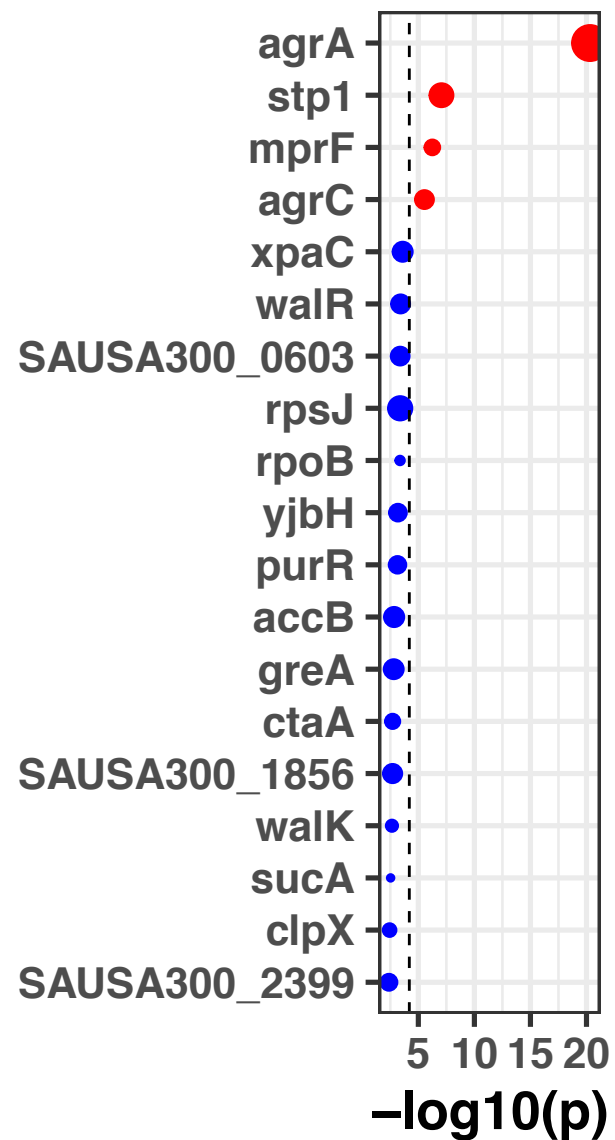

B

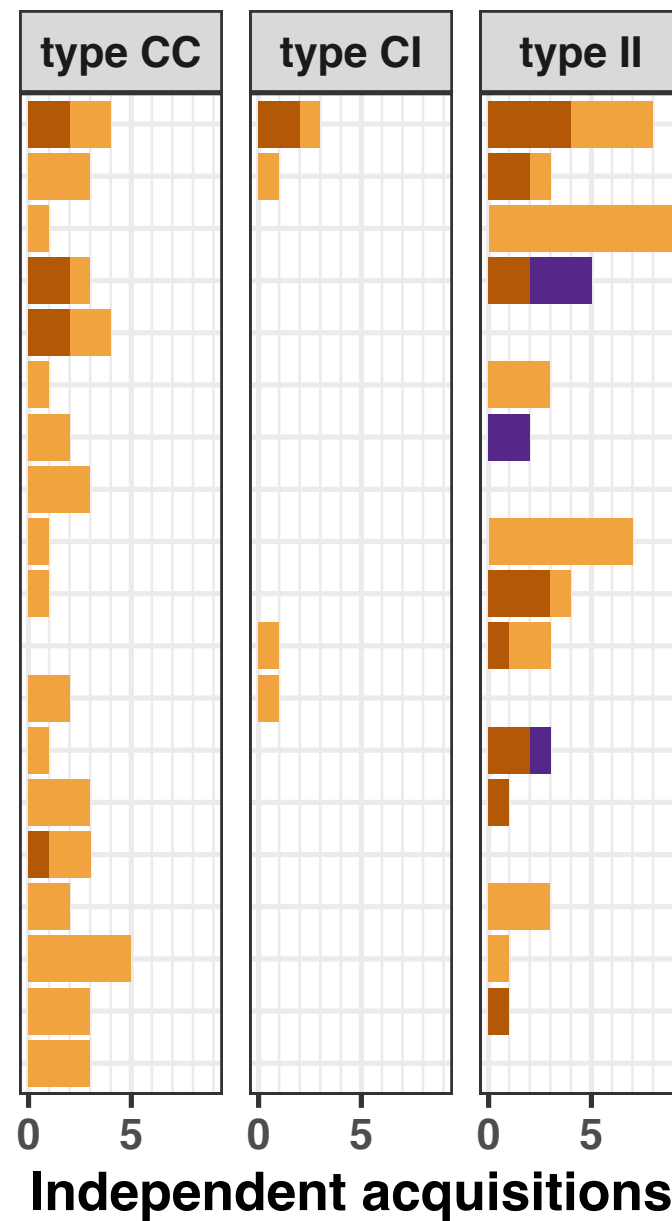

C

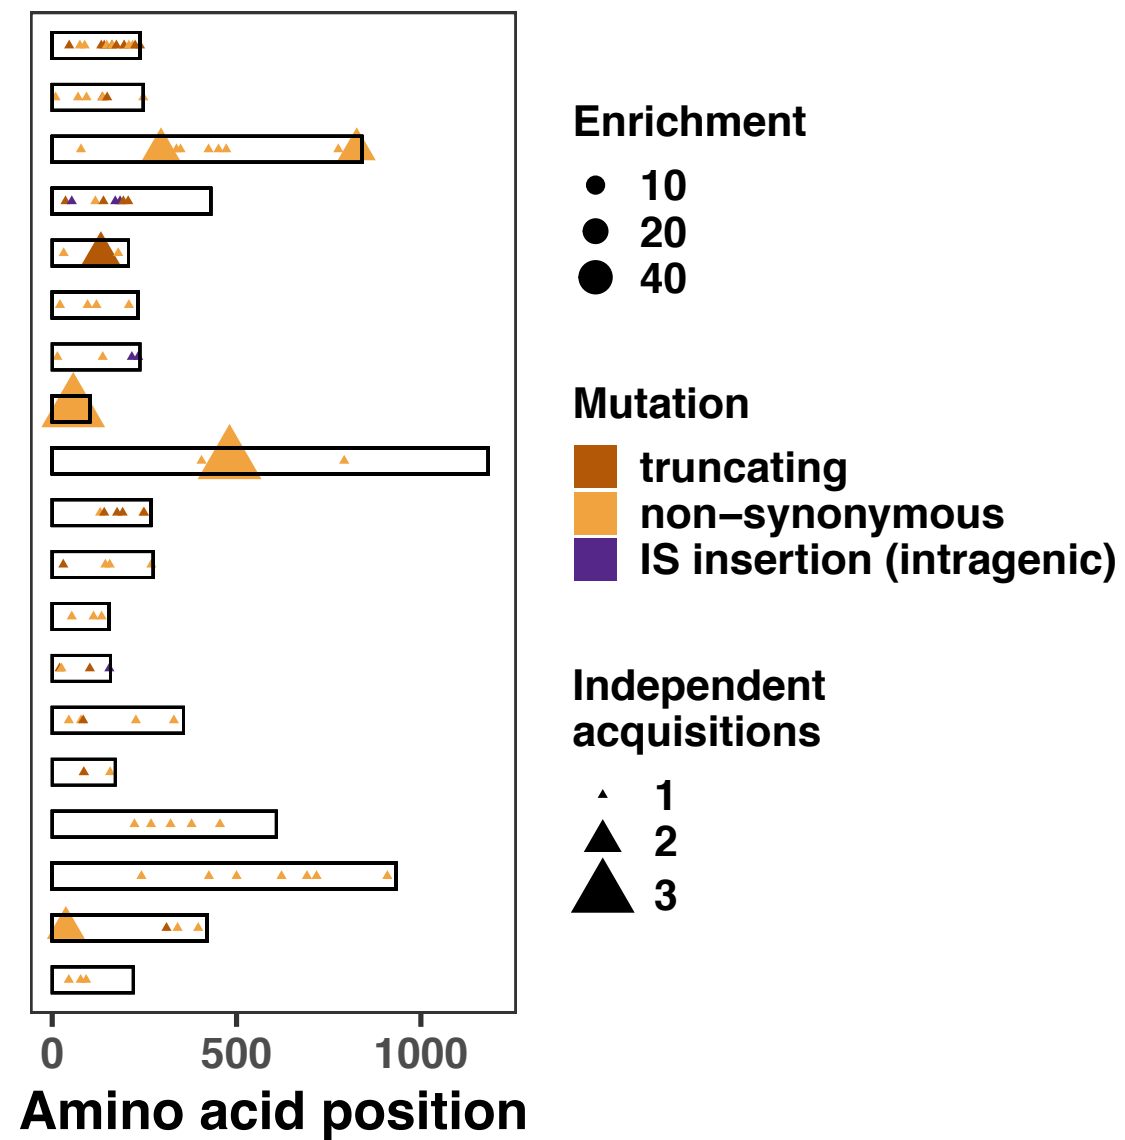

Supplement: supp [file elife-77195-supp-v1.zip]

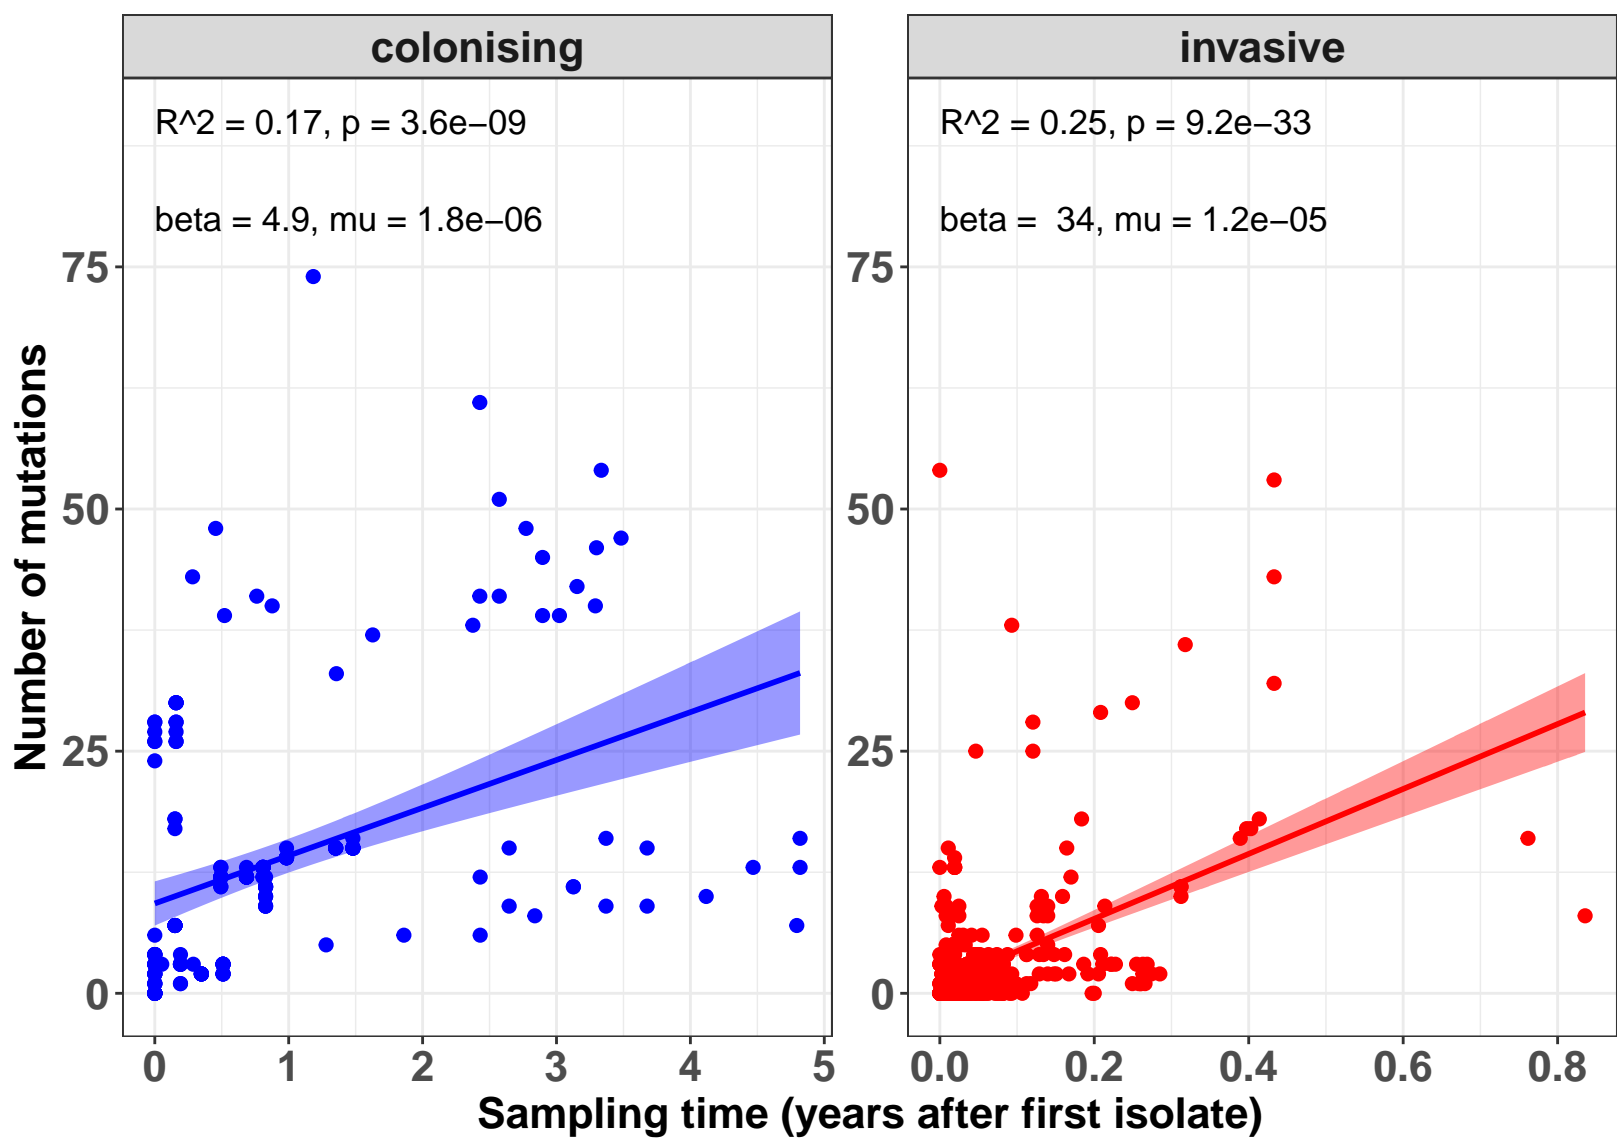

Supplement: supp [file elife-77195-supp-v1.zip]

**A**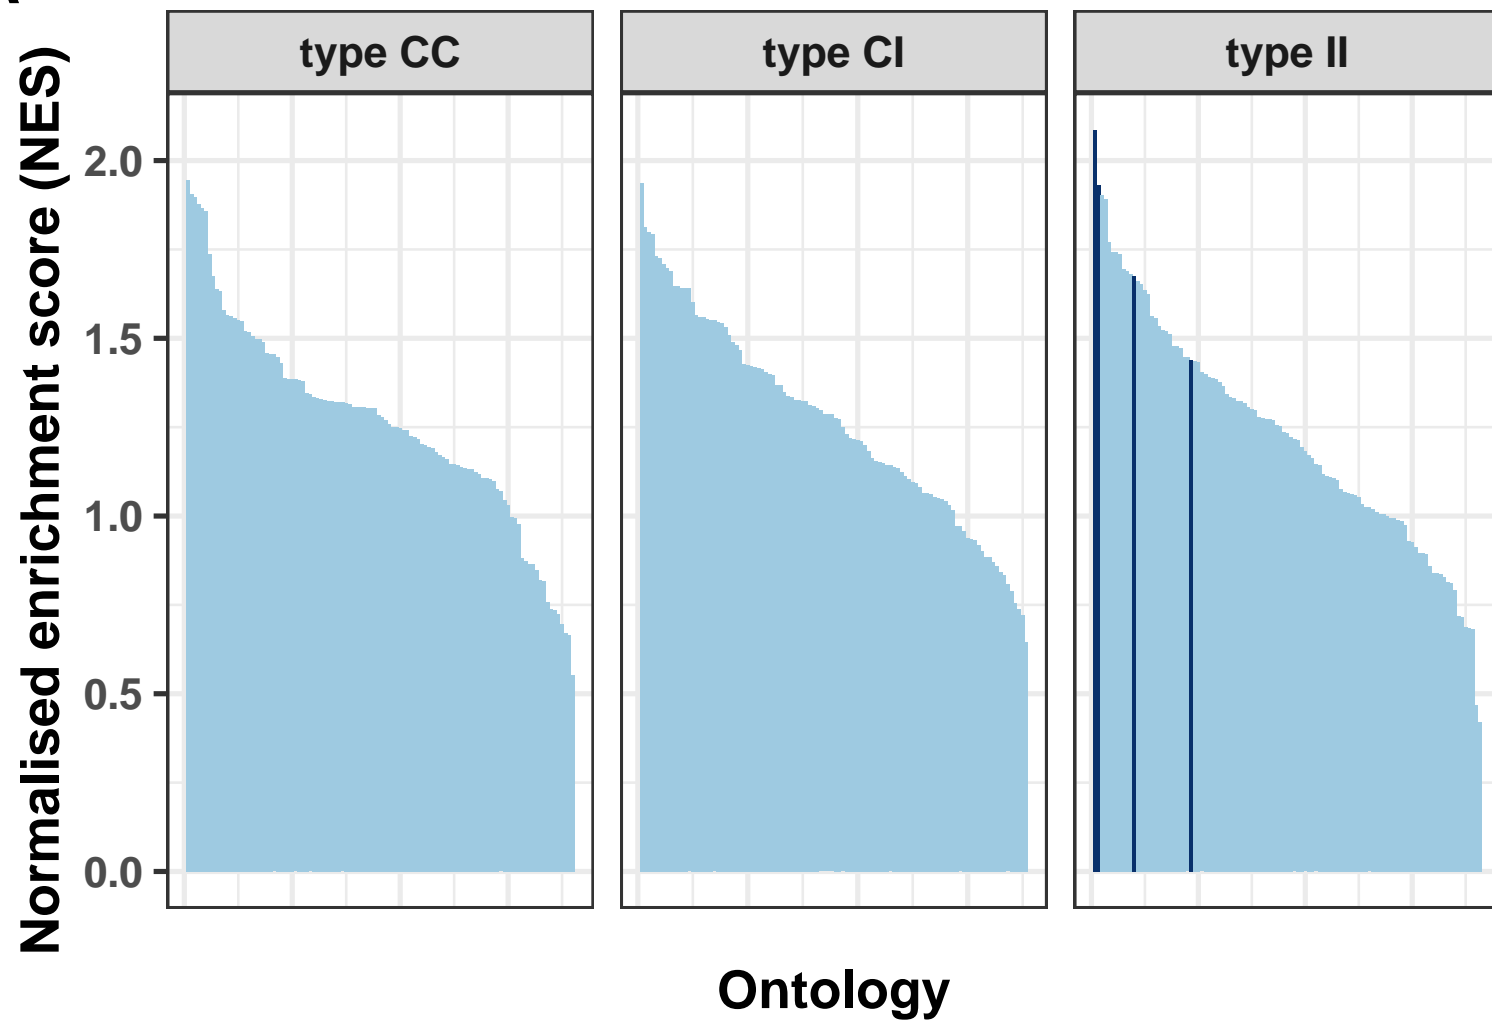**B**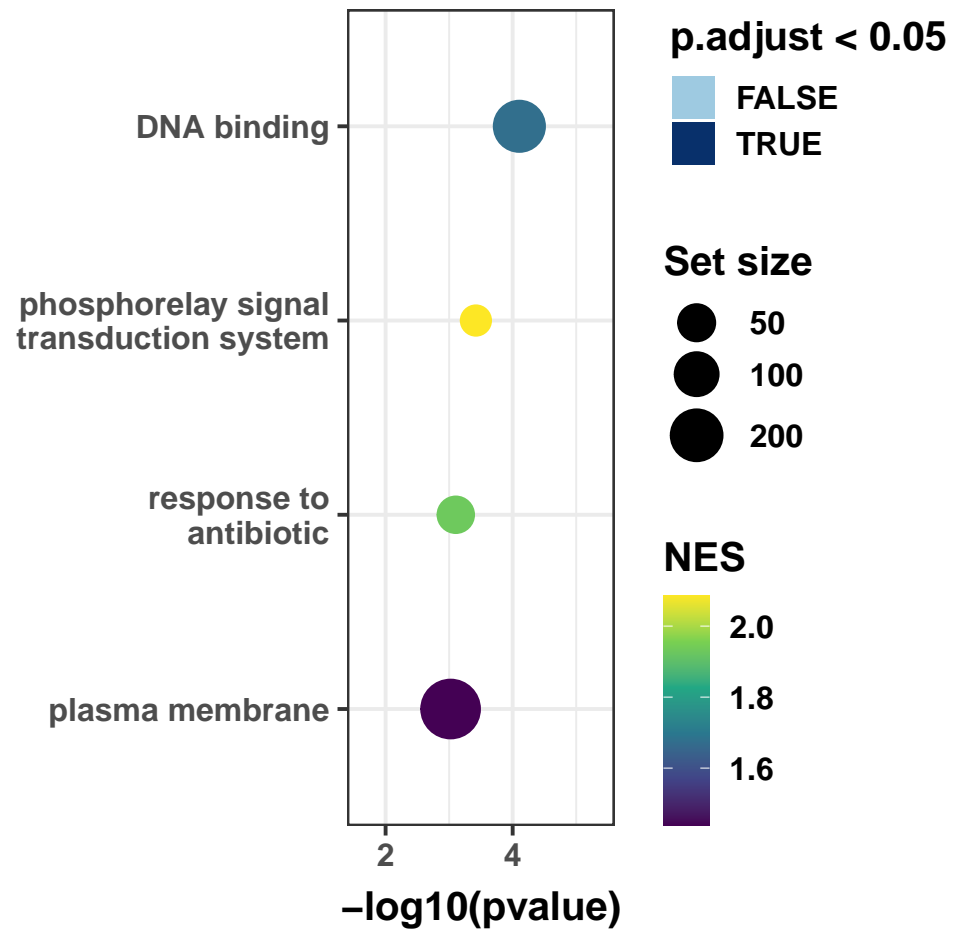

Supplement: supp [file elife-77195-supp-v1.zip]

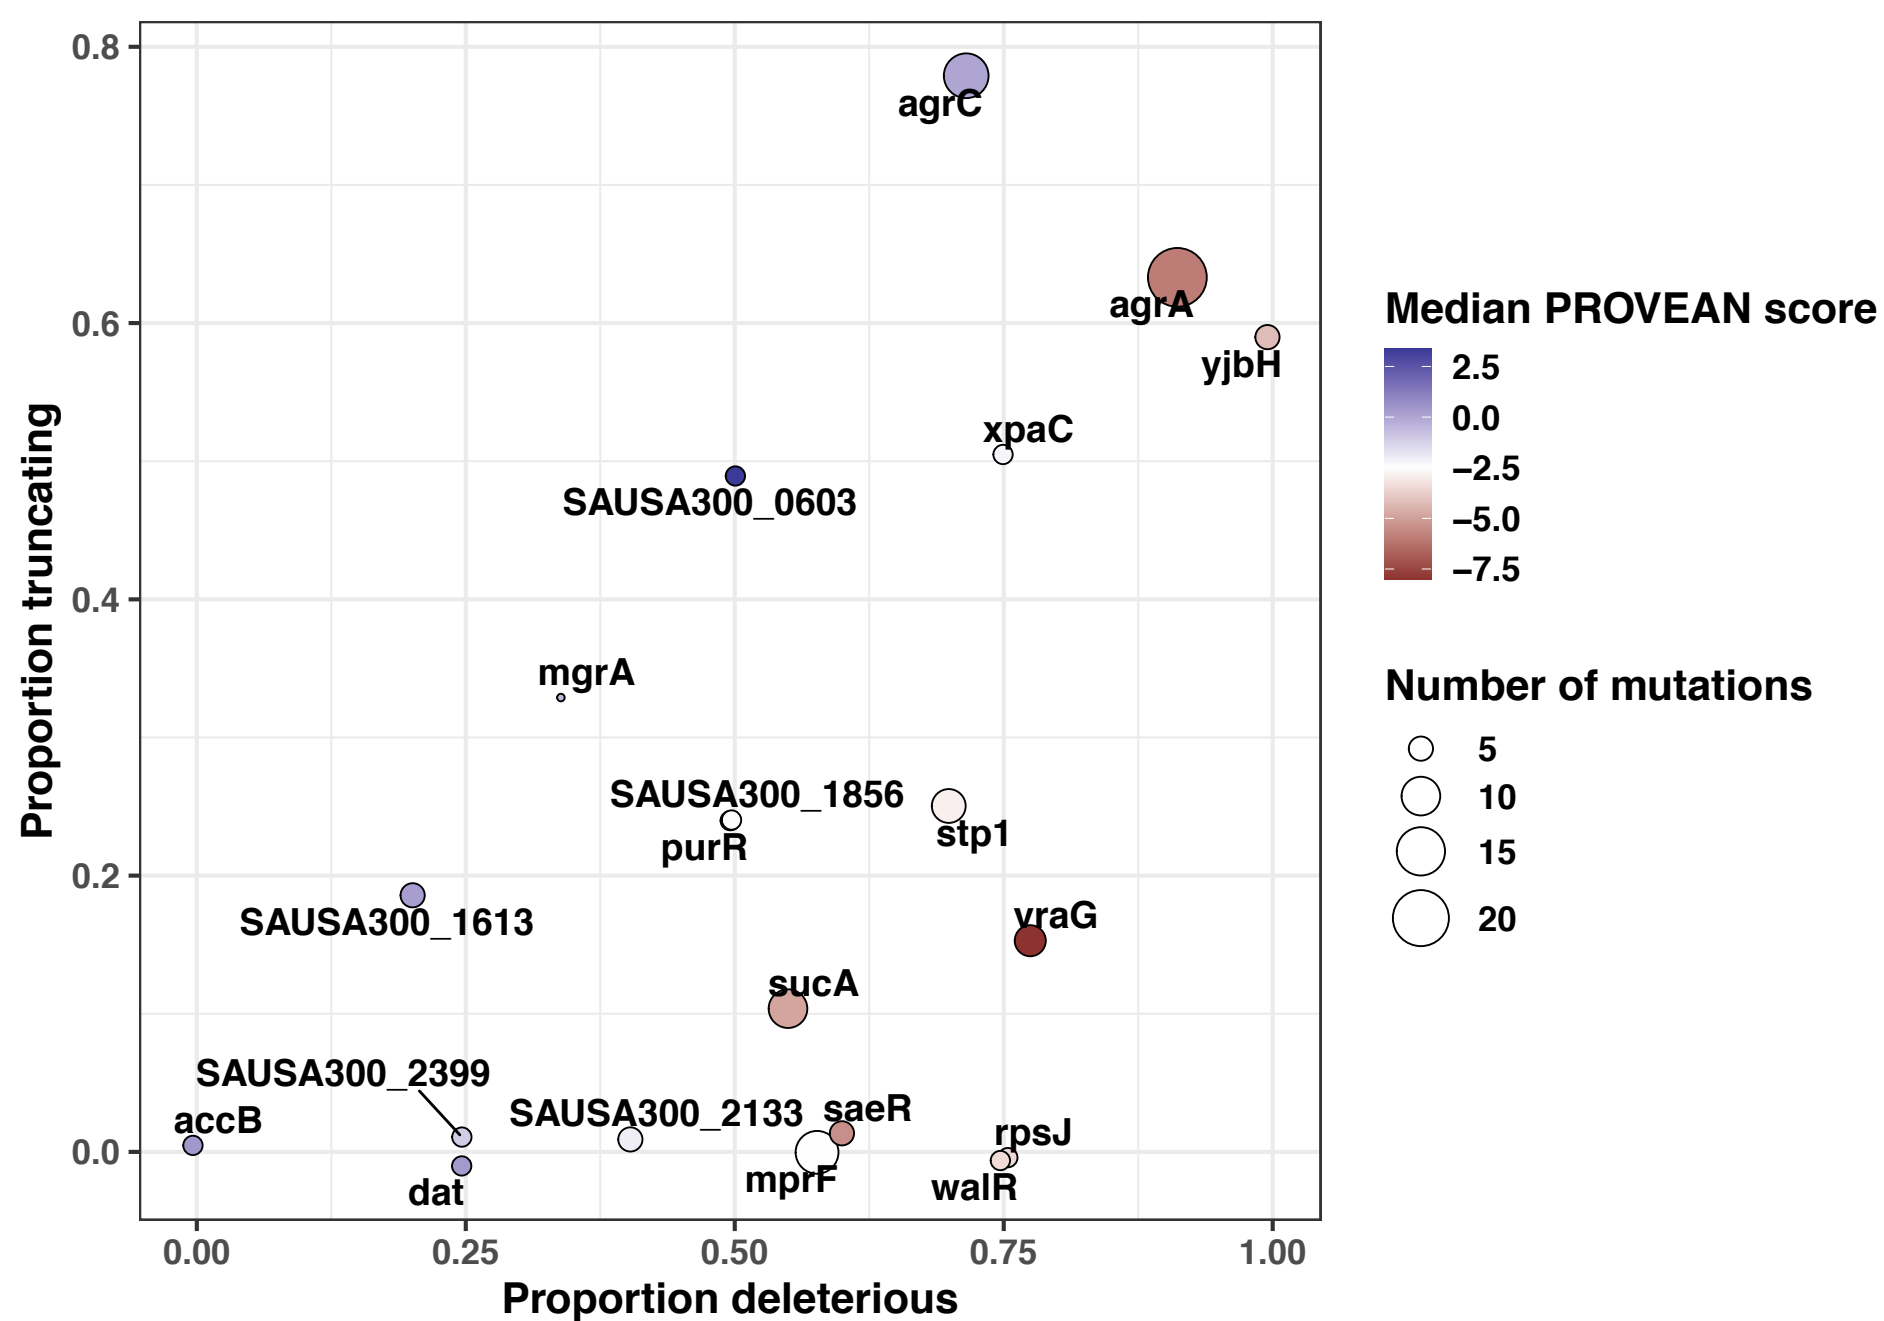

Supplement: supp [file elife-77195-supp-v1.zip]
